# Supplementary material for: Comparative Analysis of miRNA-mRNA Regulation in the Testes of Gobiocypris rarus following 17α-Methyltestosterone Exposure
Source: MDPI journal article supplement (doi:10.3390/ijms24044239), 2023-02-20
Supplement: s1 [file s1]

Table S5 The significant top 5 KEGG pathways gathered according to the comparison between different concentrations of 17MT addition. 35 hits have been matched in metabolic KEGG pathways in 25 ng/L 17MT groups when compared with controls.

| Comparison        | Top 5 pathways                          | hits | Q-value  |
|-------------------|-----------------------------------------|------|----------|
| Con-M-VS-MT25-M   | Metabolic pathways                      | 35   | 9.22E-01 |
|                   | Cell adhesion molecules (CAMs)          | 19   | 6.70E-05 |
|                   | Neuroactive ligand-receptor interaction | 18   | 2.45E-01 |
|                   | Phagosome                               | 12   | 5.29E-02 |
|                   | Oxidative phosphorylation               | 10   | 5.29E-02 |
| Con-M-VS-MT50-M   | Metabolic pathways                      | 61   | 3.93E-01 |
|                   | Cytokine-cytokine receptor interaction  | 30   | 2.88E-07 |
|                   | Phagosome                               | 22   | 1.81E-04 |
|                   | Biosynthesis of secondary metabolites   | 19   | 5.46E-01 |
|                   | Neuroactive ligand-receptor interaction | 19   | 7.71E-01 |
| Con-M-VS-MT100-M  | Metabolic pathways                      | 91   | 0.000174 |
|                   | Biosynthesis of secondary metabolites   | 31   | 0.010379 |
|                   | Neuroactive ligand-receptor interaction | 22   | 0.693384 |
|                   | Biosynthesis of antibiotics             | 22   | 0.003869 |
|                   | Phagosome                               | 16   | 0.078623 |
| MT25-M-VS-MT50-M  | Metabolic pathways                      | 107  | 5.62E-01 |
|                   | Neuroactive ligand-receptor interaction | 45   | 1.69E-01 |
|                   | Cell adhesion molecules (CAMs)          | 44   | 1.01E-07 |
|                   | Cytokine-cytokine receptor interaction  | 44   | 3.62E-07 |
|                   | Phagosome                               | 36   | 8.78E-06 |
| MT25-M-VS-MT100-M | Metabolic pathways                      | 120  | 1.35E-05 |
|                   | Biosynthesis of secondary metabolites   | 42   | 3.06E-03 |
|                   | Neuroactive ligand-receptor interaction | 37   | 1.27E-01 |
|                   | Biosynthesis of antibiotics             | 23   | 2.58E-02 |
|                   | Calcium signaling pathway               | 21   | 1.00E+00 |
| MT50-M-VS-MT100-M | Metabolic pathways                      | 51   | 9.99E-01 |
|                   | Cytokine-cytokine receptor interaction  | 41   | 3.46E-11 |
|                   | Neuroactive ligand-receptor interaction | 30   | 2.94E-01 |
|                   | Calcium signaling pathway               | 27   | 2.94E-01 |
|                   | Cell adhesion molecules (CAMs)          | 24   | 4.49E-03 |
