# Supplementary material for: Comparative Analysis of miRNA-mRNA Regulation in the Testes of Gobiocypris rarus following 17α-Methyltestosterone Exposure
Source: MDPI journal article supplement (doi:10.3390/ijms24044239), 2023-02-20
Supplement: s1 [file s1]

Table S6 The mRNA and miRNA profile in the comparison by STEM analysis.

| RNA ID-Profile15 | MT25-M | MT50-M | MT100-M | Note                                                                   |
|------------------|--------|--------|---------|------------------------------------------------------------------------|
| <i>cyp2j2</i>    | -0.06  | 1.83   | 2.21    | cytochrome P450 2J2-like                                               |
| <i>pcyt1b</i>    | -0.11  | 1.48   | 1.43    | choline-phosphate cytidyltransferase B-like                            |
| <i>anpep</i>     | -0.63  | 1.95   | 2.16    | aminopeptidase N-like                                                  |
| <i>ptgds</i>     | -0.24  | 1.11   | 1.33    | prostaglandin-H2 D-isomerase-like                                      |
| <i>hsd11b1l</i>  | -0.03  | 1.5    | 1.74    | 11-beta-hydroxysteroid dehydrogenase-like protein                      |
| <i>adh5</i>      | -0.14  | 1.41   | 1.81    | alcohol dehydrogenase                                                  |
| <i>gapdh</i>     | -0.36  | 1.33   | 1.21    | Gapdh protein, partial                                                 |
| <i>spaml</i>     | 0.18   | 1.66   | 2.14    | hyaluronidase PH-20-like                                               |
| <i>acp5</i>      | -0.78  | 0.84   | 0.81    | tartrate-resistant acid phosphatase type 5-like                        |
| <i>gstz1</i>     | -0.08  | 1      | 0.98    | glutathione S-transferase zeta                                         |
| <i>bhmt</i>      | -0.19  | 1.44   | 1.35    | Bhmt protein                                                           |
| <i>gys2</i>      | -0.11  | 1.21   | 0.84    | glycogen [starch] synthase, liver-like                                 |
| <i>pygl</i>      | -0.45  | 1.32   | 1.35    | glycogen phosphorylase, liver form-like                                |
| <i>lipc</i>      | -0.32  | 1.66   | 2.15    | hepatic triacylglycerol lipase isoform X1                              |
| <i>agmat</i>     | 0.01   | 1.01   | 1.29    | agmatinase, mitochondrial                                              |
| <i>hao1</i>      | -0.3   | 1.45   | 1.62    | hydroxyacid oxidase 1                                                  |
| <i>pkm</i>       | -0.03  | 1.52   | 0.81    | pyruvate kinase                                                        |
| <i>cbs</i>       | 0.08   | 1.12   | 1.44    | cystathionine beta-synthase-like                                       |
| <i>kynu</i>      | 0.01   | 1.92   | 1.84    | kynureninase-like isoform X1                                           |
| <i>acmsd</i>     | -0.23  | 1.09   | 1.41    | 2-amino-3-carboxymuconate-6-semialdehyde decarboxylase-like isoform X1 |
| <i>ftcd</i>      | -0.5   | 1.14   | 1.3     | formimidoyltransferase-cyclodeaminase-like                             |
| <i>uox</i>       | -0.17  | 0.92   | 1.29    | uricase-like                                                           |
| <i>msmo1</i>     | 0.19   | 1.28   | 1.4     | methylsterol monooxygenase 1 isoform X1                                |
| <i>kmo</i>       | -0.09  | 0.82   | 1.01    | kynurenine 3-monooxygenase                                             |
| <i>ugt2b20</i>   | -0.03  | 1.66   | 1.66    | UDP-glucuronosyltransferase 2B15-like isoform X1                       |
| <i>grhpr</i>     | -0.21  | 1.28   | 1.47    | glyoxylate reductase/hydroxypyruvate reductase-like                    |
| <i>tdo2a</i>     | -0.5   | 1.32   | 1.14    | Tdo2 protein                                                           |
| <i>hpd</i>       | -0.2   | 1.49   | 1.78    | 4-hydroxyphenylpyruvate dioxygenase                                    |
| <i>ugt2a2</i>    | 0.25   | 1.16   | 1.45    | UDP-glucuronosyltransferase 2A2                                        |
| <i>dpys</i>      | 0.23   | 1.74   | 2.01    | dihydropyrimidinase                                                    |

|                          |       |      |       |                                                                       |
|--------------------------|-------|------|-------|-----------------------------------------------------------------------|
| <i>pah</i>               | -0.09 | 1.42 | 1.5   | phenylalanine-4-hydroxylase                                           |
| <i>ldhbb</i>             | -0.55 | 1.48 | 0.99  | L-lactate dehydrogenase B-B chain                                     |
| <i>cyp27a1</i>           | 0.1   | 0.88 | 1.18  | sterol 26-hydroxylase, mitochondrial-like                             |
| <i>gamt</i>              | -0.59 | 1.01 | 0.82  | guanidinoacetate N-methyltransferase                                  |
| <i>tat</i>               | 0.54  | 2.24 | 2.25  | tyrosine aminotransferase isoform X1                                  |
| <i>pck1</i>              | -0.3  | 1.03 | 1.01  | phosphoenolpyruvate carboxylase                                       |
| <i>pla2g12b</i>          | -0.29 | 1.82 | 1.41  | group XIIB secretory phospholipase A2-like protein isoform X1         |
| <i>sds</i>               | -0.37 | 0.79 | 0.83  | serine dehydratase-like                                               |
| <i>fah</i>               | -0.17 | 0.98 | 0.81  | fumarylacetoacetase-like                                              |
| <i>anpep</i>             | 0.48  | 2.8  | 2.44  | aminopeptidase N-like                                                 |
| <i>agxt2</i>             | -0.18 | 0.81 | 1.07  | alanine--glyoxylate aminotransferase 2, mitochondrial-like isoform X1 |
| <i>scp2</i>              | 0.15  | 0.98 | 1.17  | non-specific lipid-transfer protein isoform X2                        |
| <i>hgd</i>               | -0.18 | 0.94 | 1.23  | homogentisate 1,2-dioxygenase-like isoform X1                         |
| <i>me3</i>               | -0.72 | 0.87 | 0.88  | NADP-dependent malic enzyme-like                                      |
| <i>aldob</i>             | 0.03  | 1.79 | 1.91  | fructose-bisphosphate aldolase B-like                                 |
| <i>upb1</i>              | -0.04 | 1.18 | 1.5   | beta-ureidopropionase                                                 |
| <i>gpt2l</i>             | 0.18  | 1.11 | 1.24  | alanine aminotransferase 2-like isoform X1                            |
| <i>hmgcr</i>             | -0.18 | 0.78 | 0.95  | 3-hydroxy-3-methylglutaryl-coenzyme A reductase                       |
| <i>tdo2b</i>             | -0.38 | 1.17 | 1.39  | tryptophan 2,3-dioxygenase B isoform X2                               |
| <i>cda</i>               | -0.54 | 1.38 | 1.49  | cytidine deaminase-like                                               |
| <i>anpep</i>             | 0.34  | 5.6  | 3.05  | aminopeptidase N protein                                              |
| <i>haao</i>              | -0.68 | 1.19 | 1.58  | 3-hydroxyanthranilate 3,4-dioxygenase                                 |
| <b>miRNA ID-Profile5</b> |       |      |       |                                                                       |
| <i>mir-9-x</i>           | -0.89 | 0.48 | 0.36  |                                                                       |
| <i>mir-7133-y</i>        | -2.14 | 0.05 | 0.16  |                                                                       |
| <i>mir-551-y</i>         | -1.64 | 0.02 | -0.27 |                                                                       |
| <i>mir-409-x</i>         | -1.78 | 0.6  | -0.64 |                                                                       |
| <i>mir-3963-x</i>        | -4.23 | 2.5  | -0.16 |                                                                       |
| <i>mir-409-y</i>         | -6.19 | 1.27 | -0.9  |                                                                       |
| <i>mir-335-x</i>         | -4.23 | 3.14 | 2.04  |                                                                       |
| <i>mir-4968-y</i>        | -5.74 | 1.12 | 0.54  |                                                                       |
| <i>mir-2422-x</i>        | -4.59 | 1.49 | 1.95  |                                                                       |

**miRNA ID-Profile11**

|                   |       |      |       |
|-------------------|-------|------|-------|
| <i>mir-215-x</i>  | -0.42 | 1.72 | 0.42  |
| <i>mir-459-x</i>  | -1.73 | 2.45 | 0.18  |
| <i>mir-459-y</i>  | -1.33 | 2.91 | -1.67 |
| <i>mir-4792-x</i> | 0     | 5.96 | 0     |
| <i>mir-279-y</i>  | 0     | 6.7  | 0     |
| <i>mir-1966-x</i> | 0     | 6.14 | 0     |

**miRNA ID-Profile12**

|                   |       |      |      |
|-------------------|-------|------|------|
| <i>mir-192-x</i>  | -0.3  | 1.62 | 0.7  |
| <i>mir-194-x</i>  | -0.33 | 1.41 | 0.74 |
| <i>mir-31-x</i>   | -0.25 | 0.99 | 0.61 |
| <i>mir-192-z</i>  | 0.04  | 1.65 | 1.13 |
| <i>mir-72-x</i>   | -0.35 | 0.9  | 0.63 |
| <i>mir-722-y</i>  | -0.48 | 0.98 | 0.76 |
| <i>mir-122-y</i>  | -0.32 | 1.01 | 0.61 |
| <i>mir-9083-x</i> | -1.25 | 2.93 | 1.34 |
| <i>mir-733-x</i>  | -0.53 | 1.33 | 1.21 |

**miRNA ID-Profile13**

|                  |       |       |       |                                                    |
|------------------|-------|-------|-------|----------------------------------------------------|
| <i>mir-133-z</i> | 0.67  | 0.11  | -0.82 |                                                    |
| <i>soat2</i>     | -0.71 | 1.36  | 1.28  | sterol O-acyltransferase 2-like isoform X1         |
| <i>inhbb</i>     | -1.08 | 1.42  | 1.23  | inhibin beta B chain-like                          |
| <i>ihhb</i>      | -0.14 | 1.46  | 1.89  | indian hedgehog B protein-like isoform X1          |
| <i>gadm</i>      | 0.04  | 1.55  | 1.36  | glycine amidinotransferase, mitochondrial          |
| <i>faxdc2</i>    | -0.42 | 1.21  | 1.43  | fatty acid hydroxylase domain-containing protein 2 |
| <i>ebp</i>       | -0.39 | 1.22  | 1.72  | 3-beta-hydroxysteroid-Delta(8),Delta(7)-isomerase  |
| <i>cyp1a1</i>    | -0.34 | 1.66  | 1.37  | cytochrome P450 1a                                 |
| <i>miR-122-x</i> | -0.41 | 1.12  | 1.02  |                                                    |
| <i>miR-574-x</i> | -2.08 | -0.28 | -0.3  |                                                    |
| <i>miR-430-y</i> | -0.37 | 1.07  | -0.27 |                                                    |
| <i>miR-217-x</i> | -0.91 | 0.94  | -0.45 |                                                    |
| <i>lin-4-x</i>   | 0.56  | 0.19  | -0.72 |                                                    |
| <i>miR-7-y</i>   | 0.27  | -0.93 | -2.33 |                                                    |
