# Supplementary material for: Comparative Analysis of miRNA-mRNA Regulation in the Testes of Gobiocypris rarus following 17α-Methyltestosterone Exposure
Source: MDPI journal article supplement (doi:10.3390/ijms24044239), 2023-02-20
Supplement: s1 [file s1]

Table S3 Statistical analysis of DEGs and DEMs ( $n=3$ ). In the comparison of 25 ng L<sup>-1</sup> 17MT group with the controls, 59 DEGs (including 26 upregulated and 33 downregulated genes) were identified. In the comparison of 25 ng L<sup>-1</sup> 17MT group with the controls, 49 of the total DEMs (including 15 upregulated and 34 downregulated genes) were identified. Table description: (1) Pair: control versus experimental group name; (2) Up: the number of upregulated genes with significant differences; (3) Down: the number of downregulated genes with significant difference; novel miRNAs.

| Pair              | DGEs, DEMs/known/novel<br>(Up) | DGEs, DEMs/known/novel<br>(Down) |
|-------------------|--------------------------------|----------------------------------|
| Con-M-VS-MT25-M   | 26, 15/4/11                    | 33, 34/7/27                      |
| Con-M-VS-MT50-M   | 52, 25/19/13                   | 25, 41/2/15                      |
| Con-M-VS-MT100-M  | 35, 32/6/19                    | 31, 17/14/27                     |
| MT25-M-VS-MT50-M  | 91, 68/27/41                   | 209, 19/7/12                     |
| MT25-M-VS-MT100-M | 114, 43/12/31                  | 132, 37/13/24                    |
| MT50-M-VS-MT100-M | 118, 24/5/19                   | 17, 34/18/16                     |
