# Supplementary material for: Comparative Analysis of miRNA-mRNA Regulation in the Testes of Gobiocypris rarus following 17α-Methyltestosterone Exposure
Source: MDPI journal article supplement (doi:10.3390/ijms24044239), 2023-02-20
Supplement: s1 [file s1]

Table S8 Correlations between miRNAs and mRNAs<sup>a</sup>.

|               | miR-122-x | miR-574-x | miR-430-y | miR-217-x | lin-4-x | miR-7-y |
|---------------|-----------|-----------|-----------|-----------|---------|---------|
| <i>faxdc2</i> | 0.831     | -0.876    | 0.602     | 0.268     | -0.302  | -0.968  |
| <i>inhbb</i>  | 0.995     | 0.996     | 0.640     | 0.711     | -0.704  | -0.897  |
| <i>ihhb</i>   | 0.927     | 0.914     | 0.679     | 0.467     | -0.964  | -0.897  |
| <i>soat2</i>  | 0.987     | 0.984     | 0.820     | 0.871     | -0.492  | -0.450  |
| <i>gatm</i>   | 0.998     | 0.997     | 0.759     | 0.819     | -0.575  | -0.811  |
| <i>ebp</i>    | 0.861     | 0.870     | 0.262     | 0.354     | 0.460   | 0.346   |
| <i>cyplal</i> | 0.998     | 0.999     | 0.673     | 0.741     | 0.364   | 0.354   |

Analyses were performed with SPSS Statistics 22.0.

<sup>a</sup> Analysis was carried out using Pearson's correlation coefficient.
