# Supplementary material for: Comparative Analysis of miRNA-mRNA Regulation in the Testes of Gobiocypris rarus following 17α-Methyltestosterone Exposure
Source: MDPI journal article supplement (doi:10.3390/ijms24044239), 2023-02-20
Supplement: s1 [file s1]

Table S1 Primer sequences for qRT-PCR. The original sequence was acquired from the *G. rarus* transcriptome database compiled in the present study. Primers were designed based on the original sequence. *soat2* (sterol O-acyltransferase 2-like isoform X1, steroid biosynthesis and lipid metabolism), *inhbb* (inhibin beta B chain-like, cytokine-cytokine receptor interaction), *ihhb* (indian hedgehog B protein-like isoform X1, hedgehog signaling pathway), *gatm* (glycine amidinotransferase, arginine and proline metabolism), *faxdc2* (fatty acid hydroxylase domain-containing protein 2, biosynthesis of antibiotics), *ebp* (3 $\beta$ hydroxysteroid- $\Delta$ 8,7-isomerase, biosynthesis of secondary metabolites) and *cyp1a1* (cytochrome P450 1a, retinol metabolism) has been selected for qRT-PCR verification. The miRNAs' name were as follows: *miR-122-x*, *miR-574-x*, *miR-430-y*, *miR-217-x*, *lin-4-x* and *miR-7-y*.

| Gene             | primer 5'-3'                                          |
|------------------|-------------------------------------------------------|
| <i>soat2</i>     | F: AAGCACCAACAACAGGCACA<br>R: TGACCGTACTCAACTGACCAAAC |
| <i>inhbb</i>     | F: CTCGGAGTCGTTCTCGTGG<br>R: ACCGTCTGCGTGATGTTTCG     |
| <i>ihhb</i>      | F: AGTGGTGGTCAATGGTGTCGT<br>R: CCAGTGCAGCAGTGAGGAATA  |
| <i>gatm</i>      | F: CTCCGACGCCTCTTATTCCA<br>R: CGATACCGAGATTTTCAAACATT |
| <i>faxdc2</i>    | F: ACTTCACCTCGCCTTGGG<br>R: AACAGCACCGTCTTCGCC        |
| <i>ebp</i>       | F: CGCAACCTGTCTATTCCCAAC<br>R: ACCTTCTCCCTCCGCTCAA    |
| <i>cyp1a1</i>    | F: TGTCGTCTATCTCGTGCGGTAT<br>R: GGTGAAGGGAAGGAAGGAGG  |
| <i>ef1a</i>      | F: ACAAATGCGGTGGAATCG<br>R: TCAAACCTCCAGAGAGCGATA     |
| <i>u6</i>        | GCGCGGCCTGCATTGTACACAC                                |
| <i>miR-122-x</i> | GCCGTGGAGTGTGACAATGGTGTGTTGT                          |
| <i>miR-574-x</i> | CCGGTGAGTGTGTGAGTGTGAGTGTGA                           |
| <i>miR-430-y</i> | GCCGCGTAAGTGCTATTTGTTGGGGTAG                          |
| <i>miR-217-x</i> | CCGGGTACTGCATCAGGAAGTATTGGA                           |
| <i>lin-4-x</i>   | CCGCCTCCCTGAGACCCTACTTGTG                             |
| <i>miR-7-y</i>   | GCCGGCCAACAAGTCATAGTCTTCCTCA                          |
