# Supplementary material for: Comparative Analysis of miRNA-mRNA Regulation in the Testes of Gobiocypris rarus following 17α-Methyltestosterone Exposure
Source: MDPI journal article supplement (doi:10.3390/ijms24044239), 2023-02-20
Supplement: s1 [file s1]

Table S2 Quality of sequencing data ( $n=3$ )

| Sample      | Genes<br>Num-R<br>NA | Ratio-R<br>NA | total  | rRNA   | snRNA  | snoRNA | tRNA   | known<br>mirna<br>num | novel<br>mirna<br>num | miRNA<br>_numbe<br>r | target_g<br>ene_nu<br>mber |
|-------------|----------------------|---------------|--------|--------|--------|--------|--------|-----------------------|-----------------------|----------------------|----------------------------|
| Con         | 67300±<br>988        | 0.92±0.<br>01 | 841909 |        |        |        |        |                       |                       |                      |                            |
|             |                      |               | ±25275 | 6725±1 |        |        | 2378±9 |                       |                       | 1145±3               | 23850±                     |
|             |                      |               | 3      | 338    | 615±46 | 158±7  | 8      | 424±43                | 721±65                | 2                    | 13                         |
| MT25-<br>M  | 67823±<br>1166       | 0.92±0.<br>02 | 725271 |        |        |        |        |                       |                       |                      |                            |
|             |                      |               | ±22838 | 6590±5 |        |        | 2265±1 |                       |                       | 1082±4               | 23819±                     |
|             |                      |               | 2      | 91     | 703±77 | 159±18 | 25     | 408±71                | 674±34                | 5                    | 79                         |
| MT50-<br>M  | 67709±<br>551        | 0.92±0.<br>01 | 773402 |        |        |        |        |                       |                       |                      |                            |
|             |                      |               | ±29053 | 8817±1 |        |        | 2753±7 | 504±10                |                       | 1238±5               | 23961±                     |
|             |                      |               | 1      | 612    | 754±59 | 198±31 | 2      | 9                     | 734±78                | 3                    | 70                         |
| MT100<br>-M | 68633±<br>873        | 0.93±0.<br>01 | 720409 |        |        |        |        |                       |                       |                      |                            |
|             |                      |               | ±26674 | 8650±2 |        |        | 2681±1 |                       | 691±10                | 1105±8               | 23822±                     |
|             |                      |               | 1      | 77     | 756±32 | 150±13 | 51     | 414±37                | 0                     | 4                    | 69                         |
