# Supplementary material for: Comparative Analysis of miRNA-mRNA Regulation in the Testes of Gobiocypris rarus following 17α-Methyltestosterone Exposure
Source: Int J Mol Sci. 2023 Feb 20;24(4):4239. doi: 10.3390/ijms24044239 (PMC9968023; doi:10.3390/ijms24044239)
Supplement: Supplementary file 1 [file ijms-24-04239-s001.zip]

Archive with 19 entries (19 files):
- Figure S1(a,b).jpg
- Figure S1(c).tif
- Figure S2.jpg
- Figure S3.jpg
- Supplementary Figure and Table legends.pdf
- Table S1.pdf
- Table S2.pdf
- Table S3-Con-M-VS-MT100-M.annot.xls
- Table S3-Con-M-VS-MT25-M.annot.xls
- Table S3-Con-M-VS-MT50-M.annot.xls
- Table S3-MT25-M-VS-MT100-M.annot.xls
- Table S3-MT25-M-VS-MT50-M.annot.xls
- Table S3-MT50-M-VS-MT100-M.annot.xls
- Table S3.pdf
- Table S4.xls
- Table S5.pdf
- Table S6.pdf
- Table S7.pdf
- Table S8.pdf
