# Supplementary material for: Comparative Analysis of miRNA-mRNA Regulation in the Testes of Gobiocypris rarus following 17α-Methyltestosterone Exposure
Source: Int J Mol Sci. 2023 Feb 20;24(4):4239. doi: 10.3390/ijms24044239 (PMC9968023; doi:10.3390/ijms24044239)
Supplement: Supplementary file 1 [file ijms-24-04239-s001.zip › Table S3-Con-M-VS-MT25-M.annot.xls]

GeneID	Con-M_count	MT25-M_count	Con-M1_rpkm	Con-M2_rpkm	Con-M3_rpkm	MT25-M1_rpkm	MT25-M2_rpkm	MT25-M3_rpkm	Con-M_rpkm	MT25-M_rpkm	log2 Ratio(MT25-M/Con-M)	Pvalue	FDR	no	Symbol	Description	Pathway	GO Component	GO Function	GO Process
Unigene0063955	249.3333333	0	3.4684	4.1679	3.2189	0	0	0	3.6184	0.001	-11.82113619	1.31E-27	9.49E-23	no	Alb	serum albumin preproprotein [Mus musculus]	-	GO:0031982//vesicle;GO:0044464//cell part;GO:0032991//macromolecular complex;GO:0043231//intracellular membrane-bounded organelle;GO:0043226//organelle;GO:0044421//extracellular region part;GO:0044424//intracellular part;GO:0005578//proteinaceous extracellular matrix;GO:0005576//extracellular region;GO:0043229//intracellular organelle;GO:0031988//membrane-bounded vesicle;GO:0031012//extracellular…	GO:0005515//protein binding;GO:0097159//organic cyclic compound binding;GO:0043169//cation binding;GO:0003676//nucleic acid binding;GO:0046914//transition metal ion binding;GO:0046872//metal ion binding;GO:0043168//anion binding;GO:0043167//ion binding;GO:0005488//binding;GO:0008289//lipid binding;GO:1901363//heterocyclic compound binding	GO:0044763//single-organism cellular process;GO:0051701//interaction with host;GO:0051715//cytolysis in other organism;GO:0007622//rhythmic behavior;GO:0051704//multi-organism process;GO:0003013//circulatory system process;GO:0008219//cell death;GO:0001907//killing by symbiont of host cells;GO:0044403//symbiosis, encompassing mutualism through parasitism;GO:0044419//interspecies interaction betwe…
Unigene0023992	134.3333333	0	3.2833	6.5349	4.8777	0	0	0	4.898633333	0.001	-12.25816359	4.30E-20	1.56E-15	no	Mup2	predicted gene, 21320 precursor [Mus musculus]	-	GO:0005576//extracellular region;GO:0044421//extracellular region part	GO:0005488//binding;GO:0005549//odorant binding	GO:0051234//establishment of localization;GO:0051179//localization
Unigene0013256	79.33333333	0	2.0994	2.5418	1.7575	0	0	0	2.1329	0.001	-11.05860061	7.85E-17	1.90E-12	no	MT-CO1	cytochrome c oxidase subunit I, partial (mitochondrion) [Homo sapiens]	ko01100//Metabolic pathways//Global and Overview//Metabolism;ko04260//Cardiac muscle contraction//Circulatory system//Organismal Systems;ko00190//Oxidative phosphorylation//Energy metabolism//Metabolism	-	-	-
Unigene0059886	45.33333333	0	1.4866	2.1709	1.6625	0	0	0	1.773333333	0.001	-10.79224803	6.23E-13	1.13E-08	no	MT-ATP6	ATP synthase F0 subunit 6 (mitochondrion) [Homo sapiens]	ko01100//Metabolic pathways//Global and Overview//Metabolism;ko00190//Oxidative phosphorylation//Energy metabolism//Metabolism	-	-	-
Unigene0030299	57	0	3.1715	1.708	0.8742	0	0	0	1.9179	0.001	-10.90531178	3.36E-12	4.87E-08	no	-	--	-	-	-	-
Unigene0013257	37.33333333	0	2.2518	2.2966	1.4448	0	0	0	1.997733333	0.001	-10.9641483	1.86E-11	2.25E-07	no	MT-CO1	cytochrome oxidase I, partial (mitochondrion) [Homo sapiens]	ko01100//Metabolic pathways//Global and Overview//Metabolism;ko04260//Cardiac muscle contraction//Circulatory system//Organismal Systems;ko00190//Oxidative phosphorylation//Energy metabolism//Metabolism	-	-	-
Unigene0069858	53	0.666666667	2.6187	4.4036	2.4058	0	0	0.1085	3.1427	0.036166667	-6.441200113	2.48E-11	2.56E-07	no	Apoe	apolipoprotein E, isoform CRA_a, partial [Mus musculus]	-	GO:0005737//cytoplasm;GO:0032991//macromolecular complex;GO:0044424//intracellular part;GO:0015630//microtubule cytoskeleton;GO:0031988//membrane-bounded vesicle;GO:0034358//plasma lipoprotein particle;GO:0032994//protein-lipid complex;GO:0097458//neuron part;GO:0043232//intracellular non-membrane-bounded organelle;GO:0044425//membrane part;GO:0044444//cytoplasmic part;GO:0005623//cell;GO:0044459…	GO:0043167//ion binding;GO:0022892//substrate-specific transporter activity;GO:0005319//lipid transporter activity;GO:0015245//fatty acid transporter activity;GO:0008289//lipid binding;GO:0008047//enzyme activator activity;GO:0033218//amide binding;GO:0005515//protein binding;GO:0005539//glycosaminoglycan binding;GO:0097367//carbohydrate derivative binding;GO:0070325//lipoprotein particle recepto…	GO:0010543//regulation of platelet activation;GO:0070555//response to interleukin-1;GO:0031325//positive regulation of cellular metabolic process;GO:0046068//cGMP metabolic process;GO:0032879//regulation of localization;GO:0051172//negative regulation of nitrogen compound metabolic process;GO:0065003//macromolecular complex assembly;GO:0006811//ion transport;GO:0072359//circulatory system develop…
Unigene0003110	66.33333333	0.333333333	3.5104	1.5004	0.6508	0	0	0.026	1.8872	0.008666667	-7.766554391	8.65E-11	7.84E-07	no	-	--	-	-	-	-
Unigene0066219	58	0	2.7839	0.4029	3.4704	0	0	0	2.219066667	0.001	-11.1157373	3.34E-10	2.49E-06	no	-	--	-	-	-	-
Unigene0014361	118	7.333333333	2.0316	2.5041	2.067	0.2565	0.1084	0.1019	2.2009	0.1556	-3.822179631	3.43E-10	2.49E-06	no	EEF1A1	PREDICTED: elongation factor 1-alpha 1-like [Ovis aries]	ko03013//RNA transport//Translation//Genetic Information Processing	GO:0043234//protein complex;GO:0044424//intracellular part;GO:0005737//cytoplasm;GO:0070013//intracellular organelle lumen;GO:0005623//cell;GO:0044421//extracellular region part;GO:0044464//cell part;GO:0031981//nuclear lumen;GO:0044428//nuclear part;GO:0043233//organelle lumen;GO:0031982//vesicle;GO:0032991//macromolecular complex;GO:0016020//membrane;GO:0005634//nucleus;GO:0044444//cytoplasmic …	GO:0032550//purine ribonucleoside binding;GO:0036094//small molecule binding;GO:0097367//carbohydrate derivative binding;GO:0005488//binding;GO:0016818//hydrolase activity, acting on acid anhydrides, in phosphorus-containing anhydrides;GO:0016462//pyrophosphatase activity;GO:0005515//protein binding;GO:0097159//organic cyclic compound binding;GO:0003723//RNA binding;GO:0017111//nucleoside-triphos…	GO:0006807//nitrogen compound metabolic process;GO:0006351//transcription, DNA-templated;GO:0044699//single-organism process;GO:0009261//ribonucleotide catabolic process;GO:0019439//aromatic compound catabolic process;GO:0046700//heterocycle catabolic process;GO:0006915//apoptotic process;GO:0065003//macromolecular complex assembly;GO:0032774//RNA biosynthetic process;GO:0010467//gene expression;…
Unigene0068087	28.33333333	0	1.3766	1.8226	1.4838	0	0	0	1.561	0.001	-10.60825482	4.57E-10	3.01E-06	no	MT-CO2	cytochrome oxidase subunit II (mitochondrion) [Homo sapiens]	ko01100//Metabolic pathways//Global and Overview//Metabolism;ko04260//Cardiac muscle contraction//Circulatory system//Organismal Systems;ko00190//Oxidative phosphorylation//Energy metabolism//Metabolism	-	-	-
Unigene0014912	29.66666667	0	2.3369	0.5688	2.9604	0	0	0	1.955366667	0.001	-10.93322345	2.48E-08	0.000149672	no	-	--	-	-	-	-
Unigene0068316	23.33333333	0	1.8552	0.6851	1.9892	0	0	0	1.509833333	0.001	-10.56017359	4.21E-08	0.000234622	no	MT-ND4L	NADH dehydrogenase subunit 4L (mitochondrion) [Homo sapiens]	ko01100//Metabolic pathways//Global and Overview//Metabolism;ko00190//Oxidative phosphorylation//Energy metabolism//Metabolism	-	-	-
Unigene0014543	0	50.66666667	0	0	0	2.3232	2.604	0.0498	0.001	1.659	10.69609817	1.12E-07	0.000552404	no	-	--	-	-	-	-
Unigene0055752	89.66666667	8	4.2174	2.1761	5.0706	0.2111	0.4414	0.4227	3.821366667	0.3584	-3.414446151	1.14E-07	0.000552404	no	-	--	-	-	-	-
Unigene0067331	0	62	0	0	0	4.8167	2.602	0.03	0.001	2.4829	11.27781044	2.31E-07	0.001045963	no	-	--	-	-	-	-
Unigene0066321	0	105	0	0	0	29.4062	18.2216	0	0.001	15.87593333	13.95455379	2.45E-07	0.001045963	no	-	--	-	-	-	-
Unigene0048013	26.66666667	0	2.3903	1.117	0.2973	0	0	0	1.2682	0.001	-10.30856657	2.93E-07	0.001181912	no	-	--	-	-	-	-
Unigene0000584	6.333333333	74.66666667	0.3005	0.0836	0.4449	3.921	1.6475	4.6151	0.276333333	3.394533333	3.618731746	3.56E-07	0.00134888	no	-	--	-	-	-	-
Unigene0044242	761.3333333	41.33333333	22.8594	1.2364	23.481	0.7689	1.0482	0.9332	15.85893333	0.916766667	-4.11259734	3.72E-07	0.00134888	no	-	--	-	-	-	-
Unigene0045409	0	66	0	0	0	2.4502	2.3713	0	0.001	1.607166667	10.65030383	6.67E-07	0.002302767	no	-	--	-	-	-	-
Unigene0012433	0	18.33333333	0	0	0	0.7346	0.7587	2.1397	0.001	1.211	10.24198315	8.09E-07	0.002665135	no	MTA	--	-	-	-	-
Unigene0023740	3.666666667	37	0.2648	0.3223	0.1373	2.4027	2.0022	3.3784	0.241466667	2.594433333	3.425523514	1.05E-06	0.003142191	no	-	--	-	-	-	-
Unigene0043241	2	101.6666667	0.3866	0.0941	0.1002	3.6285	29.5665	1.0569	0.193633333	11.4173	5.881750378	1.08E-06	0.003142191	no	-	--	-	-	-	-
Unigene0059237	19.66666667	0	2.2311	0.4204	1.6411	0	0	0	1.430866667	0.001	-10.48267353	1.08E-06	0.003142191	no	-	--	-	-	-	-
Unigene0066976	14	0	1.3483	1.5939	1.098	0	0	0	1.346733333	0.001	-10.3952485	1.50E-06	0.004168857	no	-	SHLP4 [Homo sapiens]	-	-	-	-
Unigene0045872	65	6.666666667	2.1549	1.1843	3.5305	0.2609	0.2425	0.2533	2.2899	0.252233333	-3.182453748	1.89E-06	0.005068084	no	Tmem63b	PREDICTED: CSC1-like protein 2 isoform X1 [Sinocyclocheilus anshuiensis]	-	-	-	-
Unigene0071789	0	49.66666667	0	0	0	3.9617	1.0887	0	0.001	1.683466667	10.71721944	3.21E-06	0.008317279	no	-	--	-	-	-	-
Unigene0020857	0	38.33333333	0	0	0	3.7904	1.952	0	0.001	1.914133333	10.90247561	3.99E-06	0.00997264	no	-	--	-	-	-	-
Unigene0046244	63	0	11.9295	0	2.333	0	0	0	4.754166667	0.001	-12.21497677	4.21E-06	0.010174221	no	-	--	-	-	-	-
Unigene0039370	39.33333333	1009.666667	0.1401	0.6518	1.0651	0.5845	22.1652	25.1813	0.619	15.977	4.689913319	4.68E-06	0.010952796	no	MR1	MHC class I antigen, partial [Ctenopharyngodon idella]	ko04144//Endocytosis//Transport and catabolism//Cellular Processes;ko04514//Cell adhesion molecules (CAMs)//Signaling molecules and interaction//Environmental Information Processing;ko04145//Phagosome//Transport and catabolism//Cellular Processes	-	-	-
Unigene0025467	7.666666667	87.33333333	0.1436	0.2795	1.2647	7.634	11.4364	2.6159	0.5626	7.228766667	3.683568066	5.40E-06	0.012238436	no	Ighv3-6	immunoglobulin zeta heavy chain, partial [Danio rerio]	-	-	-	-
Unigene0063269	13	0	0.7806	0.38	1.0403	0	0	0	0.733633333	0.001	-9.51891538	7.20E-06	0.01581893	no	-	--	-	-	-	-
Unigene0008726	3	72.33333333	0.0768	0.0748	0.0199	3.3164	1.6753	0.07	0.057166667	1.687233333	4.883341522	7.84E-06	0.016297228	no	-	PREDICTED: histone H2A.Z-specific chaperone CHZ1-like isoform X1 [Astyanax mexicanus]	-	-	-	-
Unigene0044821	337.3333333	0.666666667	10.5588	0	0.5928	0	0	0.02	3.7172	0.006666667	-9.123035003	7.87E-06	0.016297228	no	HLA-DPA1	MHC class II alpha antigen [Ctenopharyngodon idella]	ko04514//Cell adhesion molecules (CAMs)//Signaling molecules and interaction//Environmental Information Processing;ko04145//Phagosome//Transport and catabolism//Cellular Processes;ko04672//Intestinal immune network for IgA production//Immune system//Organismal Systems	GO:0044459//plasma membrane part;GO:0098796//membrane protein complex;GO:0005623//cell;GO:0071944//cell periphery;GO:0098797//plasma membrane protein complex;GO:0044464//cell part;GO:0044425//membrane part;GO:0005886//plasma membrane;GO:0031224//intrinsic component of membrane;GO:0042611//MHC protein complex;GO:0016020//membrane;GO:0043234//protein complex;GO:0032991//macromolecular complex	-	GO:0019882//antigen processing and presentation;GO:0002376//immune system process
Unigene0033277	24.33333333	0	0.8699	1.4116	0.0334	0	0	0	0.771633333	0.001	-9.591771657	9.99E-06	0.020115587	no	Bank1	PREDICTED: B-cell scaffold protein with ankyrin repeats-like [Sinocyclocheilus rhinocerous]	-	-	-	-
Unigene0009325	133.3333333	7	0.6144	0.4365	5.7828	0.0623	0.1545	0.1513	2.2779	0.1227	-4.21449726	1.04E-05	0.020361171	no	Samd3	PREDICTED: sterile alpha motif domain-containing protein 3-like isoform X1 [Oreochromis niloticus]	-	-	-	-
Unigene0025001	13.33333333	82.33333333	0.3185	0.4134	0.3301	4.2837	1.2346	1.886	0.354	2.4681	2.801579584	1.22E-05	0.023262743	no	-	PREDICTED: uncharacterized protein LOC109199857 [Oreochromis niloticus]	-	-	-	-
Unigene0055899	223.3333333	733.3333333	0.8734	1.244	0.7581	4.5436	2.9922	2.9714	0.9585	3.5024	1.869493523	1.28E-05	0.023742256	no	-	PREDICTED: nesprin-1-like [Sinocyclocheilus rhinocerous]	-	-	-	-
Unigene0041677	3.333333333	89.33333333	0	0.3011	0.0801	3.435	0.2698	6.7286	0.127066667	3.4778	4.774517445	1.38E-05	0.024992873	no	COL1A2	PREDICTED: collagen alpha-1(X) chain [Danio rerio]	-	-	-	-
Unigene0046773	6.333333333	56.33333333	0.3647	0.4882	0	4.221	2.7569	1.786	0.2843	2.9213	3.361124518	1.48E-05	0.025210824	no	-	--	-	-	-	-
Unigene0027093	29.66666667	0	2.0604	0	1.8241	0	0	0	1.294833333	0.001	-10.3385507	1.49E-05	0.025210824	no	-	PREDICTED: vegetative cell wall protein gp1-like isoform X1 [Sinocyclocheilus grahami]	-	-	-	-
Unigene0020979	31	0	2.6058	0	1.4168	0	0	0	1.340866667	0.001	-10.38895007	1.51E-05	0.025210824	no	-	--	-	-	-	-
Unigene0014489	0.333333333	14.33333333	0.0652	0	0	1.0611	0.5311	1.3671	0.021733333	0.986433333	5.504240183	1.56E-05	0.025210824	no	-	PREDICTED: inositol hexakisphosphate and diphosphoinositol-pentakisphosphate kinase 2-like, partial [Notothenia coriiceps]	-	-	-	-
Unigene0056512	0	10	0	0	0	1.0145	0.7334	1.1491	0.001	0.965666667	9.915381469	1.57E-05	0.025210824	no	-	PREDICTED: nesprin-1-like [Sinocyclocheilus rhinocerous]	-	-	-	-
Unigene0071309	2.333333333	35.33333333	0.042	0	0.261	0.6302	2.4408	1.6827	0.101	1.584566667	3.971661161	1.67E-05	0.025210824	no	-	--	-	-	-	-
Unigene0017409	35	1.333333333	1.8766	0.2076	2.4755	0.0534	0	0.1166	1.5199	0.056666667	-4.745332256	1.68E-05	0.025210824	no	-	PREDICTED: putative nuclease HARBI1 [Oreochromis niloticus]	-	-	-	-
Unigene0070141	12.66666667	0	0.9932	2.3636	0.8007	0	0	0	1.385833333	0.001	-10.43653805	1.69E-05	0.025210824	no	FTL	PREDICTED: LOW QUALITY PROTEIN: ferritin light chain-like [Nomascus leucogenys]	ko04978//Mineral absorption//Digestive system//Organismal Systems	GO:0031982//vesicle;GO:0044464//cell part;GO:0005623//cell;GO:0043227//membrane-bounded organelle;GO:0005622//intracellular;GO:0043226//organelle;GO:0044444//cytoplasmic part;GO:0005737//cytoplasm;GO:0044424//intracellular part;GO:0031988//membrane-bounded vesicle	GO:0043167//ion binding;GO:0005488//binding;GO:0046872//metal ion binding;GO:0005515//protein binding;GO:0005506//iron ion binding;GO:0043169//cation binding;GO:0046914//transition metal ion binding	GO:0046916//cellular transition metal ion homeostasis;GO:0016192//vesicle-mediated transport;GO:0006812//cation transport;GO:1902578//single-organism localization;GO:0051641//cellular localization;GO:0000041//transition metal ion transport;GO:0055082//cellular chemical homeostasis;GO:0051234//establishment of localization;GO:0098771//inorganic ion homeostasis;GO:0006811//ion transport;GO:0046907/…
Unigene0006186	79.66666667	289	0.7863	1.3967	1.1152	5.1264	3.9787	4.047	1.0994	4.384033333	1.995542383	1.70E-05	0.025210824	no	-	PREDICTED: LOW QUALITY PROTEIN: nuclear anchorage protein 1-like [Sinocyclocheilus grahami]	-	-	-	-
Unigene0062088	0	25	0	0	0	3.5935	2.2267	0	0.001	1.940066667	10.92189051	1.78E-05	0.025585935	no	-	--	-	-	-	-
Unigene0047902	212	5	10.6268	0.0399	2.4666	0.0513	0.1193	0.1495	4.377766667	0.1067	-5.35856298	1.80E-05	0.025585935	no	H2-Eb1	MHC class II antigen beta chain [Cyprinus carpio 'jian']	ko04514//Cell adhesion molecules (CAMs)//Signaling molecules and interaction//Environmental Information Processing;ko04145//Phagosome//Transport and catabolism//Cellular Processes;ko04672//Intestinal immune network for IgA production//Immune system//Organismal Systems	GO:0005886//plasma membrane;GO:0031224//intrinsic component of membrane;GO:0032991//macromolecular complex;GO:0005623//cell;GO:0044459//plasma membrane part;GO:0098797//plasma membrane protein complex;GO:0016020//membrane;GO:0044425//membrane part;GO:0042611//MHC protein complex;GO:0043234//protein complex;GO:0071944//cell periphery;GO:0044464//cell part;GO:0098796//membrane protein complex	-	GO:0019882//antigen processing and presentation;GO:0002376//immune system process
Unigene0049496	504.6666667	65.66666667	7.6483	2.5418	0.9403	0.4799	0.6433	0.4704	3.710133333	0.5312	-2.804143983	2.11E-05	0.029402138	no	KIRREL	PREDICTED: kin of IRRE-like protein 1 [Sinocyclocheilus rhinocerous]	-	-	-	GO:0072010//glomerular epithelium development;GO:0048731//system development;GO:0001822//kidney development;GO:0007399//nervous system development;GO:0044767//single-organism developmental process;GO:0048646//anatomical structure formation involved in morphogenesis;GO:0032501//multicellular organismal process;GO:0009653//anatomical structure morphogenesis;GO:0071840//cellular component organizati…
Unigene0064925	0.666666667	59	0	0	0.171	0	5.3738	9.0963	0.057	4.823366667	6.402934757	2.33E-05	0.031834847	no	-	--	-	-	-	-
Unigene0051091	0.666666667	65.66666667	0.0876	0	0	0.2739	9.521	0.1994	0.0292	3.331433333	6.834030844	2.38E-05	0.031946811	no	-	--	-	-	-	-
Unigene0017717	32	2.666666667	1.8889	0.4304	1.5829	0.1006	0.0935	0.1465	1.300733333	0.113533333	-3.518137382	2.46E-05	0.032149931	no	-	--	-	-	-	-
Unigene0043350	26.33333333	0	3.9977	0	6.0859	0	0	0	3.3612	0.001	-11.71476067	2.50E-05	0.032149931	no	-	--	-	-	-	-
Unigene0000456	3	28.66666667	0	0.2057	0.4381	2.0272	2.5396	2.0537	0.2146	2.206833333	3.362255696	2.53E-05	0.032149931	no	-	--	-	-	-	-
Unigene0057550	0	11	0	0	0	0.3434	1.1172	0.9378	0.001	0.799466667	9.642894072	2.78E-05	0.034796123	no	-	--	-	-	-	-
Unigene0071764	16	0	0.2085	0.3553	1.9994	0	0	0	0.8544	0.001	-9.738767837	3.99E-05	0.049002937	no	-	PREDICTED: uncharacterized protein LOC107694418 isoform X1 [Sinocyclocheilus anshuiensis]	-	-	-	-
Unigene0056890	97	14.33333333	2.4596	1.2828	2.7087	0.4946	0.4597	0.1401	2.150366667	0.3648	-2.559405045	4.33E-05	0.05187674	no	-	--	-	-	-	-
Unigene0052795	5	46.66666667	0.0878	0.4704	0.091	4.3418	2.0944	0.8004	0.2164	2.4122	3.478577124	4.43E-05	0.05187674	no	-	--	-	-	-	-
Unigene0068830	6.333333333	51.66666667	0.0743	0.3615	0.0257	1.8893	1.6697	0.8119	0.153833333	1.456966667	3.243527819	4.48E-05	0.05187674	no	-	--	-	-	-	-
Unigene0057146	0.666666667	17	0	0	0.1004	1.5146	0.3379	0.8823	0.033466667	0.9116	4.767604156	4.51E-05	0.05187674	no	Muc2	mucin2-like protein, partial [Megalobrama amblycephala]	-	-	-	-
Unigene0011873	65.66666667	1.333333333	4.9812	0.159	0.2257	0	0.0317	0.0744	1.788633333	0.035366667	-5.660323607	4.71E-05	0.05301937	no	TMED6	PREDICTED: transmembrane emp24 domain-containing protein 6-like [Sinocyclocheilus grahami]	-	GO:0044425//membrane part;GO:0016020//membrane;GO:0031224//intrinsic component of membrane	-	-
Unigene0041676	17.33333333	362.3333333	0.1009	0.4913	0.1494	4.4019	0.1341	10.9688	0.2472	5.168266667	4.385929862	4.75E-05	0.05301937	no	COL10A1	PREDICTED: collagen alpha-1(X) chain-like [Sinocyclocheilus grahami]	-	-	-	-
Unigene0001966	51.66666667	0.666666667	2.4038	0	4.5299	0.1094	0	0	2.311233333	0.036466667	-5.985940774	5.34E-05	0.058682865	no	Tpsab1	PREDICTED: trypsin-3-like [Sinocyclocheilus anshuiensis]	-	-	GO:0070011//peptidase activity, acting on L-amino acid peptides;GO:0004175//endopeptidase activity;GO:0003824//catalytic activity;GO:0016787//hydrolase activity;GO:0008233//peptidase activity	GO:0016485//protein processing;GO:0051604//protein maturation;GO:0006508//proteolysis;GO:0019538//protein metabolic process;GO:0043170//macromolecule metabolic process;GO:0010467//gene expression;GO:0071704//organic substance metabolic process;GO:0044238//primary metabolic process;GO:0008152//metabolic process
Unigene0067080	4795.333333	317	229.2998	9.0786	11.1206	5.1402	4.7777	7.5332	83.16633333	5.817033333	-3.837644151	5.46E-05	0.059030609	no	CPB1	PREDICTED: carboxypeptidase B [Cyprinus carpio]	-	-	GO:0043167//ion binding;GO:0008237//metallopeptidase activity;GO:0070011//peptidase activity, acting on L-amino acid peptides;GO:0046914//transition metal ion binding;GO:0005488//binding;GO:0008235//metalloexopeptidase activity;GO:0008233//peptidase activity;GO:0008238//exopeptidase activity;GO:0016787//hydrolase activity;GO:0046872//metal ion binding;GO:0003824//catalytic activity;GO:0043169//ca…	GO:0019538//protein metabolic process;GO:0009410//response to xenobiotic stimulus;GO:0043170//macromolecule metabolic process;GO:0042221//response to chemical;GO:0050896//response to stimulus;GO:0008152//metabolic process;GO:0051604//protein maturation;GO:0071704//organic substance metabolic process;GO:0016485//protein processing;GO:0006508//proteolysis;GO:0010467//gene expression;GO:0044238//pri…
Unigene0000217	40.33333333	163	0.4944	0.6761	0.244	2.6365	1.5881	2.0807	0.4715	2.101766667	2.156272837	5.71E-05	0.060872576	no	-	PREDICTED: nesprin-1-like [Sinocyclocheilus rhinocerous]	-	-	-	-
Unigene0018336	3	21	0.1229	0.1795	0.2548	1.3072	1.7153	1.2318	0.185733333	1.4181	2.932654608	6.53E-05	0.068005744	no	eps15	PREDICTED: trichohyalin-like [Cyprinus carpio]	-	-	-	-
Unigene0010173	0.333333333	10.66666667	0.0441	0	0	0.386	0.5638	0.5621	0.0147	0.503966667	5.099440254	6.57E-05	0.068005744	no	OTC	PREDICTED: ornithine carbamoyltransferase, mitochondrial-like isoform X2 [Sinocyclocheilus anshuiensis]	ko01100//Metabolic pathways//Global and Overview//Metabolism;ko01110//Biosynthesis of secondary metabolites//Global and Overview//Metabolism;ko01130//Biosynthesis of antibiotics//Global and Overview//Metabolism;ko01230//Biosynthesis of amino acids//Global and Overview//Metabolism;ko00220//Arginine biosynthesis//Amino acid metabolism//Metabolism	-	GO:0003824//catalytic activity;GO:0043168//anion binding;GO:0005488//binding;GO:0031406//carboxylic acid binding;GO:0043177//organic acid binding;GO:0043167//ion binding;GO:0036094//small molecule binding	GO:0044699//single-organism process;GO:0044281//small molecule metabolic process;GO:0044763//single-organism cellular process;GO:0008152//metabolic process;GO:0009987//cellular process;GO:0019752//carboxylic acid metabolic process;GO:0006082//organic acid metabolic process;GO:0071704//organic substance metabolic process;GO:0044710//single-organism metabolic process;GO:0043436//oxoacid metabolic p…
Unigene0009115	138.3333333	22.66666667	13.4893	5.7655	3.4669	1.5781	0.8291	1.5988	7.5739	1.335333333	-2.503836453	6.78E-05	0.069275514	no	-	--	-	-	-	-
Unigene0065765	0	9	0	0	0	0.3233	0.8264	0.7063	0.001	0.618666667	9.273018494	7.77E-05	0.077964396	no	-	--	-	-	-	-
Unigene0008761	39.66666667	267	0.2214	0.1886	1.2765	4.1728	2.3336	5.2323	0.562166667	3.9129	2.799168423	7.85E-05	0.077964396	no	cckar	PREDICTED: cholecystokinin receptor-like isoform X1 [Cyprinus carpio]	ko04080//Neuroactive ligand-receptor interaction//Signaling molecules and interaction//Environmental Information Processing;ko04020//Calcium signaling pathway//Signal transduction//Environmental Information Processing	-	-	-
Unigene0014842	16.33333333	69.66666667	0.5845	0.5989	0.3188	2.0785	3.1483	1.8778	0.500733333	2.3682	2.241676523	8.24E-05	0.080685965	no	CTRL	PREDICTED: chymotrypsin-like protease CTRL-1 [Sinocyclocheilus anshuiensis]	-	-	GO:0070011//peptidase activity, acting on L-amino acid peptides;GO:0003824//catalytic activity;GO:0016787//hydrolase activity;GO:0008233//peptidase activity;GO:0004175//endopeptidase activity	GO:0019538//protein metabolic process;GO:0006508//proteolysis;GO:0008152//metabolic process;GO:0016485//protein processing;GO:0044238//primary metabolic process;GO:0071704//organic substance metabolic process;GO:0010467//gene expression;GO:0051604//protein maturation;GO:0043170//macromolecule metabolic process
Unigene0000278	9.666666667	47.66666667	0.2543	0.2682	0.0878	1.3521	0.8871	1.0811	0.203433333	1.106766667	2.443723104	8.48E-05	0.081959061	no	-	--	-	-	-	-
Unigene0018744	129.3333333	5.333333333	2.7227	1.1671	0.0211	0.1017	0.0473	0.037	1.303633333	0.062	-4.394126121	9.23E-05	0.088019197	no	Synpo2l	PREDICTED: synaptopodin 2-like protein isoform X1 [Sinocyclocheilus rhinocerous]	-	-	-	-
Unigene0062428	0	8.333333333	0	0	0	0.5843	0.3879	0.7902	0.001	0.587466667	9.198363184	9.83E-05	0.090719873	no	-	--	-	-	-	-
Unigene0063641	13	0.333333333	0.7357	1.8304	0.5931	0	0.0951	0	1.053066667	0.0317	-5.053970122	9.86E-05	0.090719873	no	METTL21C	PREDICTED: protein-lysine methyltransferase METTL21C-like [Salmo salar]	-	-	-	-
Unigene0029614	5.333333333	34.66666667	0.3827	0.5962	0.238	1.5325	2.6708	4.0452	0.405633333	2.7495	2.760921169	9.98E-05	0.090719873	no	-	--	-	-	-	-
Unigene0006886	1	16.33333333	0	0.1734	0	0.5944	1.5194	1.028	0.0578	1.047266667	4.179415541	0.000100113	0.090719873	no	-	--	-	-	-	-
Unigene0073204	31.66666667	1.333333333	2.144	1.6371	0.1743	0.1578	0.0489	0	1.318466667	0.0689	-4.258213304	0.000105684	0.094586157	notest	S100Z	PREDICTED: protein S100-Z-like isoform X1 [Sinocyclocheilus anshuiensis]	-	-	GO:0046872//metal ion binding;GO:0043167//ion binding;GO:0005488//binding;GO:0043169//cation binding	-
Unigene0017491	3	26.33333333	0	0.0796	0.2965	1.3808	0.9032	1.2289	0.125366667	1.170966667	3.223474297	0.000114499	0.101225664	no	-	PREDICTED: uncharacterized protein LOC109060760 [Cyprinus carpio]	-	-	-	-
Unigene0014312	0	12.66666667	0	0	0	0.2071	0.6738	2.1869	0.001	1.0226	9.998026216	0.000118192	0.102035913	no	BETV1G	--	-	-	-	-
Unigene0070876	72	14.66666667	1.5142	2.3051	2.1402	0.3445	0.2882	0.6271	1.9865	0.419933333	-2.241996578	0.000118231	0.102035913	no	Mtco1	cytochrome c oxidase subunit I (mitochondrion) [Mus musculus]	ko01100//Metabolic pathways//Global and Overview//Metabolism;ko04260//Cardiac muscle contraction//Circulatory system//Organismal Systems;ko00190//Oxidative phosphorylation//Energy metabolism//Metabolism	GO:0044464//cell part;GO:0031224//intrinsic component of membrane;GO:0044446//intracellular organelle part;GO:0043231//intracellular membrane-bounded organelle;GO:0005622//intracellular;GO:0044424//intracellular part;GO:0019866//organelle inner membrane;GO:0043227//membrane-bounded organelle;GO:0043229//intracellular organelle;GO:0044422//organelle part;GO:0031090//organelle membrane;GO:0031967//…	GO:0046906//tetrapyrrole binding;GO:0043167//ion binding;GO:0043169//cation binding;GO:1901363//heterocyclic compound binding;GO:0003824//catalytic activity;GO:0046872//metal ion binding;GO:0005488//binding;GO:0097159//organic cyclic compound binding;GO:0046914//transition metal ion binding	GO:0044710//single-organism metabolic process;GO:0015992//proton transport;GO:0006810//transport;GO:0051179//localization;GO:0055114//oxidation-reduction process;GO:0044763//single-organism cellular process;GO:0044237//cellular metabolic process;GO:1902578//single-organism localization;GO:0006811//ion transport;GO:0045333//cellular respiration;GO:0009987//cellular process;GO:0006091//generation o…
Unigene0035473	157.6666667	555	9.8275	9.9981	3.2595	34.1856	39.7183	18.5351	7.695033333	30.813	2.001539671	0.000120091	0.102116273	no	-	--	-	-	-	-
Unigene0062869	13	0.666666667	1.3582	0.9917	0.9678	0	0	0.1547	1.1059	0.051566667	-4.422638336	0.000122237	0.102116273	no	-	--	-	-	-	-
Unigene0019261	20.33333333	464	0.8898	2.0383	0.217	2.3578	80.2343	1.8122	1.048366667	28.13476667	4.746138705	0.000122763	0.102116273	no	GIF	transcobalamin-like precursor [Danio rerio]	-	-	-	-
Unigene0056751	1.333333333	74.66666667	0	0.1208	0.1286	0	14.572	1.2433	0.083133333	5.271766667	5.986715647	0.00012564	0.102116273	no	-	PREDICTED: junctional adhesion molecule A-like, partial [Sinocyclocheilus grahami]	-	-	-	-
Unigene0070728	0.666666667	19	0.1976	0	0	4.4517	0.3448	1.6208	0.065866667	2.1391	5.021311577	0.0001273	0.102116273	no	-	--	-	-	-	-
Unigene0040601	140	496	1.6088	0.5825	0.6064	3.9346	2.7525	3.9916	0.932566667	3.559566667	1.932422853	0.00012763	0.102116273	no	CRB1	PREDICTED: protein crumbs homolog 2-like [Sinocyclocheilus rhinocerous]	-	GO:0016020//membrane;GO:0032991//macromolecular complex	-	GO:0009987//cellular process;GO:0051179//localization;GO:0044707//single-multicellular organism process;GO:0007163//establishment or maintenance of cell polarity;GO:0007154//cell communication;GO:0007155//cell adhesion;GO:0050896//response to stimulus;GO:0009790//embryo development;GO:0044763//single-organism cellular process;GO:0008104//protein localization;GO:0007166//cell surface receptor sign…
Unigene0017492	1.666666667	21.66666667	0	0.1333	0.2128	0.942	0.8755	2.6813	0.115366667	1.4996	3.700279385	0.000129881	0.102116273	no	-	PREDICTED: uncharacterized protein LOC109085272 [Cyprinus carpio]	-	-	-	-
Unigene0062584	0	9	0	0	0	1.4152	0.3289	1.0305	0.001	0.924866667	9.853101584	0.000129912	0.102116273	no	-	--	-	-	-	-
Unigene0029421	0.666666667	14.33333333	0	0	0.097	1.171	0.9252	0.2558	0.032333333	0.784	4.599759503	0.000131001	0.102116273	no	samhd1	PREDICTED: deoxynucleoside triphosphate triphosphohydrolase SAMHD1-like [Cyprinus carpio]	-	-	-	-
Unigene0059190	20.33333333	1.666666667	2.3836	0.8595	2.1961	0.3314	0	0.1609	1.813066667	0.1641	-3.46578483	0.000134847	0.10378388	no	-	--	-	-	-	-
Unigene0055323	1	14.66666667	0.0798	0	0.1654	2.196	1.2061	0.6542	0.081733333	1.3521	4.048133472	0.000136397	0.10378388	no	-	--	-	-	-	-
Unigene0033563	6.666666667	41.33333333	0.365	0.6091	0.054	3.588	2.2435	1.5201	0.3427	2.450533333	2.838077674	0.000137436	0.10378388	no	-	--	-	-	-	-
Unigene0071423	4.666666667	117.6666667	0.6663	0.1622	0.3453	1.3548	32.4498	0.3794	0.391266667	11.39466667	4.864062704	0.000143726	0.106918227	no	-	PREDICTED: tripartite motif-containing protein 65-like [Poecilia reticulata]	-	-	-	-
Unigene0046645	8.666666667	0	1.0594	0.3967	0.6757	0	0	0	0.7106	0.001	-9.472893878	0.000144536	0.106918227	no	-	--	-	-	-	-
Unigene0011788	23.66666667	0.666666667	1.1605	0.0404	1.8043	0	0.0482	0.0378	1.001733333	0.028666667	-5.126980537	0.000150051	0.109876573	no	-	PREDICTED: protein piccolo-like [Sinocyclocheilus grahami]	-	-	-	-
Unigene0014892	0	98	0	0	0	0	0	6.888	0.001	2.296	11.16490693	0.000152623	0.110642864	no	-	--	-	-	-	-
Unigene0065524	54.66666667	1.333333333	0	9.8227	3.8344	0.1052	0	0.2298	4.552366667	0.111666667	-5.349346263	0.000158281	0.113608477	no	-	--	-	-	-	-
Unigene0026517	0	97	0	0	0	15.5046	0	0	0.001	5.1682	12.33544619	0.000161616	0.114864606	no	-	PREDICTED: uncharacterized protein LOC109093630 [Cyprinus carpio]	-	-	-	-
Unigene0001541	4866.333333	108.6666667	251.7123	1.7008	1.6478	0.5028	1.8693	3.3587	85.0203	1.910266667	-5.475961397	0.000163758	0.115257031	no	AMY2	PREDICTED: pancreatic alpha-amylase-like [Sinocyclocheilus anshuiensis]	ko01100//Metabolic pathways//Global and Overview//Metabolism;ko00500//Starch and sucrose metabolism//Carbohydrate metabolism//Metabolism	-	GO:0016787//hydrolase activity;GO:0003824//catalytic activity	GO:0008152//metabolic process;GO:0044238//primary metabolic process
Unigene0057247	4.333333333	30.66666667	0.3378	0.3289	0.2101	4.5653	2.0431	0.7387	0.292266667	2.449033333	3.066855208	0.000169903	0.117685801	no	-	--	-	-	-	-
Unigene0009493	7.333333333	42.33333333	0.1854	0.4513	0.032	1.6241	1.258	1.4079	0.2229	1.43	2.681546625	0.000170456	0.117685801	no	-	--	-	-	-	-
Unigene0004240	9	43	0.1991	0.6204	0.2477	1.7442	2.5013	1.4515	0.355733333	1.899	2.416371835	0.000183824	0.125718141	no	-	--	-	-	-	-
Unigene0065794	12.33333333	0	0.0772	1.0524	1.7607	0	0	0	0.963433333	0.001	-9.91204103	0.000205625	0.137713598	no	-	--	-	-	-	-
Unigene0023252	1	175.6666667	0.0183	0.0357	0	0.0459	0	8.7675	0.018	2.9378	7.350595466	0.000205646	0.137713598	no	-	PREDICTED: caldesmon-like [Cyprinus carpio]	-	-	-	-
Unigene0010528	38.66666667	126.6666667	1.009	1.2824	0.9586	4.8746	3.064	3.7538	1.083333333	3.897466667	1.847059467	0.000207328	0.137713598	no	-	--	-	-	-	-
Unigene0013356	2.333333333	18	0.1534	0.1493	0.053	0.8957	1.3082	0.8385	0.118566667	1.014133333	3.096476965	0.000208962	0.137713598	no	-	pol-like protein [Danio rerio]	-	-	-	-
Unigene0002723	6.333333333	30.33333333	0.4025	0.3919	0.7509	2.8205	2.8088	2.4205	0.5151	2.683266667	2.381065994	0.000218748	0.141891826	no	-	--	-	-	-	-
Unigene0035712	4394.333333	135.6666667	248.9936	2.8254	1.5339	1.8037	1.5424	4.6056	84.45096667	2.650566667	-4.993741204	0.000219217	0.141891826	no	CPA1	PREDICTED: carboxypeptidase A1-like [Sinocyclocheilus grahami]	-	-	GO:0008238//exopeptidase activity;GO:0008233//peptidase activity;GO:0043169//cation binding;GO:0005488//binding;GO:0008235//metalloexopeptidase activity;GO:0003824//catalytic activity;GO:0070011//peptidase activity, acting on L-amino acid peptides;GO:0046872//metal ion binding;GO:0008237//metallopeptidase activity;GO:0016787//hydrolase activity;GO:0046914//transition metal ion binding;GO:0043167/…	GO:0016485//protein processing;GO:0043170//macromolecule metabolic process;GO:0019538//protein metabolic process;GO:0051604//protein maturation;GO:0071704//organic substance metabolic process;GO:0044238//primary metabolic process;GO:0006508//proteolysis;GO:0010467//gene expression;GO:0008152//metabolic process
Unigene0017841	90.33333333	320.6666667	2.5524	1.9238	3.0154	10.7492	15.7687	3.876	2.4972	10.1313	2.02043603	0.000226693	0.145432345	no	PSMB8	proteasome subunit beta 8f [Danio rerio]	ko03050//Proteasome//Folding, sorting and degradation//Genetic Information Processing	GO:0043229//intracellular organelle;GO:0043226//organelle;GO:0043227//membrane-bounded organelle;GO:0005622//intracellular;GO:0043231//intracellular membrane-bounded organelle;GO:0044464//cell part;GO:0043234//protein complex;GO:0044424//intracellular part;GO:0005623//cell;GO:0000502//proteasome complex;GO:0032991//macromolecular complex	GO:0003824//catalytic activity;GO:0070011//peptidase activity, acting on L-amino acid peptides;GO:0008233//peptidase activity;GO:0004175//endopeptidase activity;GO:0016787//hydrolase activity	GO:0019538//protein metabolic process;GO:0071704//organic substance metabolic process;GO:0008152//metabolic process;GO:0044238//primary metabolic process;GO:0006508//proteolysis;GO:0009987//cellular process;GO:0032502//developmental process;GO:0044763//single-organism cellular process;GO:0043170//macromolecule metabolic process;GO:0044767//single-organism developmental process;GO:0048869//cellula…
Unigene0007445	1.333333333	15.66666667	0	0.1512	0	0.6803	0.813	0.5308	0.0504	0.6747	3.742750523	0.00023101	0.145881988	no	-	--	-	-	-	-
Unigene0029260	16296	509	1401.8925	12.4369	14.9981	4.7918	8.9078	30.2043	476.4425	14.63463333	-5.024843606	0.000233257	0.145881988	no	CTRB1	PREDICTED: chymotrypsin A-like [Sinocyclocheilus anshuiensis]	-	-	GO:0008233//peptidase activity;GO:0070011//peptidase activity, acting on L-amino acid peptides;GO:0016787//hydrolase activity;GO:0003824//catalytic activity	GO:0051604//protein maturation;GO:0071704//organic substance metabolic process;GO:0019538//protein metabolic process;GO:0043170//macromolecule metabolic process;GO:0016485//protein processing;GO:0044238//primary metabolic process;GO:0008152//metabolic process;GO:0006508//proteolysis;GO:0010467//gene expression
Unigene0039594	5609	133.6666667	220.0872	0.9135	1.4109	0.8269	1.2604	3.2392	74.1372	1.7755	-5.383900363	0.00023343	0.145881988	no	CEL	PREDICTED: bile salt-activated lipase-like [Sinocyclocheilus anshuiensis]	ko01100//Metabolic pathways//Global and Overview//Metabolism;ko00561//Glycerolipid metabolism//Lipid metabolism//Metabolism;ko00100//Steroid biosynthesis//Lipid metabolism//Metabolism	-	-	-
Unigene0000218	3.333333333	20.33333333	0.1953	0.1141	0.081	1.2709	0.7269	0.6763	0.130133333	0.891366667	2.776028459	0.000236234	0.146372457	no	EPS15	PREDICTED: extracellular matrix-binding protein ebh-like, partial [Sinocyclocheilus anshuiensis]	-	-	-	-
Unigene0045768	12.33333333	0	2.9428	0.1146	1.3421	0	0	0	1.4665	0.001	-10.51816136	0.000249583	0.153332634	no	-	--	-	-	-	-
Unigene0004552	5	28	0.2692	0.3669	0.1674	1.7513	2.5669	0.8338	0.267833333	1.717333333	2.680762664	0.000258321	0.157367543	no	-	--	-	-	-	-
Unigene0022316	79.66666667	12	3.507	0.6282	2.6462	0.4564	0.4568	0.2301	2.260466667	0.3811	-2.56837913	0.000262008	0.15741624	no	-	--	-	-	-	-
Unigene0049543	12.33333333	0.666666667	0.6533	0.3914	0.8334	0	0.1169	0	0.626033333	0.038966667	-4.005927047	0.000265387	0.15741624	no	-	--	-	-	-	-
Unigene0060762	0.666666667	10.66666667	0.0883	0.0859	0	1.3256	0.7187	1.0457	0.058066667	1.03	4.148790309	0.000266749	0.15741624	no	-	--	-	-	-	-
Unigene0035221	1	52	0.0629	0	0.1304	0.3149	11.0482	0.0573	0.064433333	3.8068	5.884627734	0.000269564	0.15741624	no	-	--	-	-	-	-
Unigene0027565	0	59.66666667	0	0	0	0	0	2.8568	0.001	0.952266667	9.895221823	0.000270237	0.15741624	no	ORF1	--	-	-	-	-
Unigene0031183	4.333333333	33.33333333	0	0.6345	0.1228	2.0759	1.516	2.6993	0.252433333	2.097066667	3.054398393	0.00027143	0.15741624	no	-	--	-	-	-	-
Unigene0021845	0.333333333	8.666666667	0	0	0.0947	0.7999	1.0622	0.7489	0.031566667	0.870333333	4.785094222	0.000278065	0.159984202	no	-	--	-	-	-	-
Unigene0023849	11636	546.6666667	911.1108	12.6436	15.0494	8.6804	10.4762	25.6504	312.9346	14.93566667	-4.389027641	0.000283806	0.162001986	no	Cela1	pancreatic elastase precursor [Ctenopharyngodon idella]	-	-	GO:0003824//catalytic activity;GO:0008233//peptidase activity;GO:0016787//hydrolase activity;GO:0070011//peptidase activity, acting on L-amino acid peptides;GO:0004175//endopeptidase activity	GO:0043170//macromolecule metabolic process;GO:0010467//gene expression;GO:0051604//protein maturation;GO:0044238//primary metabolic process;GO:0016485//protein processing;GO:0019538//protein metabolic process;GO:0071704//organic substance metabolic process;GO:0008152//metabolic process;GO:0006508//proteolysis
Unigene0017173	0.333333333	41.33333333	0.0936	0	0	0	13.1702	0.2558	0.0312	4.475333333	7.164305302	0.000287843	0.163022303	no	-	--	-	-	-	-
Unigene0035597	1.333333333	13.66666667	0.3595	0.1167	0	2.0994	1.9513	1.4195	0.158733333	1.8234	3.521954056	0.000308135	0.173162225	no	-	--	-	-	-	-
Unigene0016132	3	24.33333333	0	0.1309	0.4877	1.5981	1.3291	2.2662	0.2062	1.731133333	3.069600609	0.00031297	0.173601773	no	-	--	-	-	-	-
Unigene0070537	0.333333333	9	0.0507	0	0	0.6349	0.6491	0.2774	0.0169	0.520466667	4.944710617	0.000313706	0.173601773	no	-	--	-	-	-	-
Unigene0024465	491.6666667	4.666666667	0.0793	113.637	0.1644	0.3969	0.5533	0.289	37.96023333	0.413066667	-6.521970407	0.000325087	0.1781718	no	IGHV3-23	immunoglobulin zeta heavy chain, partial [Danio rerio]	-	GO:0016020//membrane;GO:0031224//intrinsic component of membrane;GO:0044425//membrane part	-	-
Unigene0055495	23	112	0.6166	0.1774	0.1743	1.28	1.0594	2.5281	0.322766667	1.6225	2.329654979	0.000329791	0.1781718	no	-	--	-	-	-	-
Unigene0054568	116.3333333	24.66666667	9.5579	3.9778	12.2509	1.3694	1.188	2.9915	8.595533333	1.849633333	-2.216347856	0.000330431	0.1781718	no	-	PREDICTED: high mobility group protein B2-like [Astyanax mexicanus]	-	-	-	-
Unigene0072608	2.333333333	31.33333333	0	0.5388	0	0.5936	2.5746	4.3221	0.1796	2.496766667	3.797201746	0.000331796	0.1781718	notest	-	--	-	-	-	-
Unigene0070002	2.333333333	21.33333333	0.2457	0	0.1019	1.1682	0.5715	1.567	0.115866667	1.102233333	3.249892176	0.000335546	0.178860699	no	-	--	-	-	-	-
Unigene0014217	13.66666667	0	2.2365	0	2.6841	0	0	0	1.6402	0.001	-10.67965603	0.000343525	0.180783731	no	-	--	-	-	-	-
Unigene0046937	0	6	0	0	0	0.4151	0.3215	0.3527	0.001	0.3631	8.50422312	0.000344141	0.180783731	no	-	--	-	-	-	-
Unigene0020777	11.66666667	0.666666667	0.6914	0.6731	0.4961	0.1331	0	0	0.6202	0.044366667	-3.805185455	0.000346988	0.180967971	no	TRIM39	PREDICTED: nuclear factor 7, brain-like [Sinocyclocheilus rhinocerous]	-	-	-	-
Unigene0014050	4126.333333	105	372.0049	1.5376	2.487	1.4822	1.2717	6.6417	125.3431667	3.131866667	-5.322716743	0.000351704	0.182117178	no	CELA2A	PREDICTED: chymotrypsin-like elastase family member 2A [Sinocyclocheilus anshuiensis]	-	-	GO:0070011//peptidase activity, acting on L-amino acid peptides;GO:0003824//catalytic activity;GO:0008233//peptidase activity;GO:0016787//hydrolase activity	GO:0016485//protein processing;GO:0008152//metabolic process;GO:0010467//gene expression;GO:0019538//protein metabolic process;GO:0071704//organic substance metabolic process;GO:0006508//proteolysis;GO:0044238//primary metabolic process;GO:0051604//protein maturation;GO:0043170//macromolecule metabolic process
Unigene0019742	0	7	0	0	0	0.63	0.4685	1.1011	0.001	0.7332	9.518062976	0.000357525	0.183818662	no	-	--	-	-	-	-
Unigene0013573	0	7.333333333	0	0	0	0.9392	0.3741	1.1724	0.001	0.828566667	9.694473971	0.000361693	0.184652029	no	-	hypothetical protein cypCar_00047735 [Cyprinus carpio]	-	-	-	-
Unigene0018674	11.66666667	0.333333333	2.637	0.6697	0.713	0.1435	0	0	1.3399	0.047833333	-4.807965192	0.000366202	0.18564661	no	-	--	-	-	-	-
Unigene0063554	6113.666667	164.3333333	581.1346	2.647	2.9175	3.282	2.7529	9.8216	195.5663667	5.2855	-5.209474513	0.000370328	0.186434602	no	CELA2A	PREDICTED: chymotrypsin-like elastase family member 2A [Sinocyclocheilus rhinocerous]	-	-	GO:0016787//hydrolase activity;GO:0003824//catalytic activity;GO:0008233//peptidase activity;GO:0004175//endopeptidase activity;GO:0070011//peptidase activity, acting on L-amino acid peptides	GO:0006508//proteolysis;GO:0019538//protein metabolic process;GO:0016485//protein processing;GO:0051604//protein maturation;GO:0010467//gene expression;GO:0008152//metabolic process;GO:0044238//primary metabolic process;GO:0043170//macromolecule metabolic process;GO:0071704//organic substance metabolic process
Unigene0027564	0	47.33333333	0	0	0	0	0	3.9569	0.001	1.318966667	10.36519239	0.000375835	0.187902088	no	ORF1	--	-	-	-	-
Unigene0066165	9	0.333333333	0.9631	0.9376	1.3726	0.1506	0	0	1.0911	0.0502	-4.441952157	0.000382714	0.190030464	no	-	--	-	-	-	-
Unigene0038268	478.6666667	1242.666667	2.182	1.4162	0.9996	5.0957	3.529	4.4082	1.5326	4.3443	1.503142523	0.000403364	0.198921747	no	pol	Retrovirus-related Pol polyprotein from transposon 297 [Larimichthys crocea]	-	-	-	-
Unigene0000219	96.66666667	277.6666667	2.1967	3.135	1.8887	9.9015	5.5161	7.4146	2.4068	7.610733333	1.66091921	0.000410516	0.201080685	no	-	PREDICTED: extracellular matrix-binding protein ebh-like, partial [Sinocyclocheilus anshuiensis]	-	-	-	-
Unigene0048063	1514.333333	3761.333333	9.5625	7.9032	7.5374	17.8004	15.9126	31.0426	8.334366667	21.5852	1.372897983	0.000415987	0.20239293	no	Igfbp5	IGFBP5B [Ctenopharyngodon idella]	-	-	-	GO:0040007//growth;GO:0009987//cellular process;GO:0044699//single-organism process;GO:0016049//cell growth;GO:0044763//single-organism cellular process
Unigene0050635	20.66666667	87.33333333	0.377	1.0094	0.5536	3.3416	4.8598	1.2595	0.646666667	3.153633333	2.285920779	0.000424353	0.205086941	no	-	PREDICTED: GTPase IMAP family member 4-like isoform X2 [Sinocyclocheilus rhinocerous]	-	-	-	-
Unigene0009431	4206	130.6666667	399.0771	3.9162	3.0687	0.8054	1.8714	9.4415	135.354	4.039433333	-5.066440792	0.000446491	0.213933286	no	CTRB1	chymotrypsin-like precursor [Danio rerio]	-	-	GO:0003824//catalytic activity;GO:0070011//peptidase activity, acting on L-amino acid peptides;GO:0004175//endopeptidase activity;GO:0016787//hydrolase activity;GO:0008233//peptidase activity	GO:0008152//metabolic process;GO:0019538//protein metabolic process;GO:0006508//proteolysis;GO:0071704//organic substance metabolic process;GO:0016485//protein processing;GO:0051604//protein maturation;GO:0010467//gene expression;GO:0043170//macromolecule metabolic process;GO:0044238//primary metabolic process
Unigene0064896	0.666666667	10.33333333	0	0	0.2356	1.849	1.0576	1.0357	0.078533333	1.3141	4.064626122	0.000448559	0.213933286	no	-	--	-	-	-	-
Unigene0065691	4088	117	255.0735	1.559	1.7908	0.58	1.1763	5.3945	86.1411	2.3836	-5.175487689	0.00045352	0.214885599	no	CTRB1	PREDICTED: chymotrypsin B-like [Sinocyclocheilus rhinocerous]	-	-	GO:0004175//endopeptidase activity;GO:0016787//hydrolase activity;GO:0008233//peptidase activity;GO:0003824//catalytic activity;GO:0070011//peptidase activity, acting on L-amino acid peptides	GO:0008152//metabolic process;GO:0043170//macromolecule metabolic process;GO:0051604//protein maturation;GO:0044238//primary metabolic process;GO:0016485//protein processing;GO:0006508//proteolysis;GO:0019538//protein metabolic process;GO:0071704//organic substance metabolic process;GO:0010467//gene expression
Unigene0055696	129.6666667	457.3333333	7.4773	8.5041	11.3716	74.063	17.3928	19.8018	9.117666667	37.08586667	2.024132912	0.000458067	0.215630772	no	-	PREDICTED: A-kinase anchor protein 9-like [Sinocyclocheilus anshuiensis]	-	-	-	-
Unigene0043619	0.333333333	11	0.0866	0	0	1.5162	0.2013	1.3406	0.028866667	1.019366667	5.142124748	0.000473783	0.221443007	no	-	--	-	-	-	-
Unigene0016716	16133.33333	454.3333333	1598.5636	9.7017	10.3635	2.8872	7.973	33.1808	539.5429333	14.68033333	-5.199781133	0.000476524	0.221443007	no	Try3	PREDICTED: trypsin-3-like [Sinocyclocheilus anshuiensis]	ko04080//Neuroactive ligand-receptor interaction//Signaling molecules and interaction//Environmental Information Processing	-	GO:0070011//peptidase activity, acting on L-amino acid peptides;GO:0016787//hydrolase activity;GO:0008233//peptidase activity;GO:0003824//catalytic activity	GO:0051604//protein maturation;GO:0043170//macromolecule metabolic process;GO:0008152//metabolic process;GO:0019538//protein metabolic process;GO:0010467//gene expression;GO:0016485//protein processing;GO:0071704//organic substance metabolic process;GO:0044238//primary metabolic process;GO:0006508//proteolysis
Unigene0020413	2	16	0.0786	0.153	0.2444	2.2618	0.914	1.0741	0.158666667	1.416633333	3.158395416	0.00048659	0.224680741	no	-	--	-	-	-	-
Unigene0033512	1.666666667	15.66666667	0.0974	0.2844	0.1009	2.9242	0.7927	1.4195	0.1609	1.712133333	3.411558826	0.000497478	0.227774157	no	-	--	-	-	-	-
Unigene0025228	30.66666667	2.666666667	1.5395	0.4684	0.1995	0	0.1399	0.0658	0.7358	0.068566667	-3.423734383	0.000499574	0.227774157	no	-	PREDICTED: activity-regulated cytoskeleton-associated protein-like [Austrofundulus limnaeus]	-	-	-	-
Unigene0016906	0	6	0	0	0	0.1902	0.2652	0.277	0.001	0.244133333	7.93152548	0.000507357	0.229877168	no	PCSK5	PREDICTED: proprotein convertase subtilisin/kexin type 5-like [Sinocyclocheilus rhinocerous]	-	-	GO:0016787//hydrolase activity;GO:0003824//catalytic activity	GO:0048856//anatomical structure development;GO:0032502//developmental process;GO:0007275//multicellular organism development;GO:0044767//single-organism developmental process;GO:0048925//lateral line system development;GO:0048882//lateral line development;GO:0009888//tissue development;GO:0048880//sensory system development;GO:0048731//system development;GO:0044707//single-multicellular organism…
Unigene0015940	16	1.333333333	1.8651	0.5084	1.2372	0	0.0868	0.2039	1.203566667	0.0969	-3.63467558	0.000523518	0.234737665	no	-	--	-	-	-	-
Unigene0039943	3.666666667	21	0.5219	0.7621	0.1352	3.4283	1.9726	3.4474	0.473066667	2.949433333	2.640322386	0.000524561	0.234737665	no	-	--	-	-	-	-
Unigene0035569	37.66666667	277	1.1211	0.9004	1.162	2.0691	23.632	1.2002	1.061166667	8.9671	3.078990223	0.000532582	0.236865103	no	TAR1-A	PREDICTED: translation initiation factor IF-2-like [Bos taurus]	-	-	-	-
Unigene0001555	0	38	0	0	0	0	0	5.0292	0.001	1.6764	10.71115071	0.000549346	0.242831125	no	ORF5	--	-	-	-	-
Unigene0027296	8.666666667	62.33333333	0	1.1077	0.5241	6.723	1.6173	4.6074	0.543933333	4.3159	2.988159693	0.000557475	0.243600508	no	-	--	-	-	-	-
Unigene0047863	1	11.66666667	0.1563	0	0.081	0.8798	0.7269	1.2813	0.0791	0.962666667	3.605286737	0.000559114	0.243600508	no	-	PREDICTED: epidermal growth factor receptor substrate 15-like [Cyprinus carpio]	-	-	-	-
Unigene0070881	15.66666667	60.66666667	0.617	0.8318	0.7871	4.2168	4.361	1.3839	0.7453	3.320566667	2.155536299	0.000561168	0.243600508	no	-	PREDICTED: uncharacterized protein LOC109098287 [Cyprinus carpio]	-	-	-	-
Unigene0024477	3.333333333	20	0.1518	0.4433	0.1573	1.0445	2.4713	1.452	0.2508	1.655933333	2.723035339	0.0005753	0.24727545	no	-	--	-	-	-	-
Unigene0067205	72	13.33333333	1.5088	0.3016	1.131	0.2191	0.1253	0.2332	0.980466667	0.192533333	-2.348360342	0.000576455	0.24727545	no	KIAA1462	PREDICTED: junctional protein associated with coronary artery disease-like [Cyprinus carpio]	-	-	-	-
Unigene0060754	0	10.66666667	0	0	0	1.8655	1.53	0	0.001	1.131833333	10.14444582	0.00059162	0.252287692	no	-	--	-	-	-	-
Unigene0058520	2	18.33333333	0	0.0741	0.3944	1.7142	2.3899	0.6934	0.156166667	1.599166667	3.356161853	0.000601067	0.253839785	no	-	--	-	-	-	-
Unigene0069524	1.333333333	11.66666667	0.1839	0.0895	0.0953	1.4959	1.0696	1.0055	0.1229	1.190333333	3.275808812	0.000602907	0.253839785	no	-	unnamed protein product, partial [Oncorhynchus mykiss]	-	-	-	-
Unigene0069993	8.666666667	0	0.2136	1.7675	0.7748	0	0	0	0.918633333	0.001	-9.843345324	0.000605764	0.253839785	no	-	LOC400590 protein [Homo sapiens]	-	-	-	-
Unigene0052794	19.66666667	81	0.6094	1.6429	0.4859	5.6896	5.3974	2.0074	0.912733333	4.3648	2.257650224	0.000616563	0.256879843	no	-	--	-	-	-	-
Unigene0015939	3	20.33333333	0.074	0.2161	0.3834	1.0183	1.4627	2.2244	0.2245	1.568466667	2.804567519	0.000628326	0.260284738	no	-	--	-	-	-	-
Unigene0016785	104.3333333	14.33333333	3.1147	0.2448	2.7872	0.4599	0.2025	0.2644	2.0489	0.308933333	-2.729482124	0.000634311	0.2612713	no	Pol	Retrovirus-related Pol polyprotein LINE-1 [Larimichthys crocea]	-	-	-	-
Unigene0013556	15.33333333	0.333333333	0.1308	2.4193	0.4067	0	0	0.0596	0.9856	0.019866667	-5.632580521	0.000643857	0.263704763	no	-	--	-	-	-	-
Unigene0014888	16	60.66666667	0.7055	1.1096	0.7875	6.1799	2.3355	2.6703	0.867533333	3.728566667	2.10363004	0.000650806	0.265053345	no	-	--	-	-	-	-
Unigene0025693	40.33333333	157.3333333	4.1142	4.3391	1.8656	24.8821	5.4828	14.4476	3.439633333	14.9375	2.118612027	0.000655033	0.26510365	no	-	--	-	-	-	-
Unigene0068286	18	1.333333333	2.2071	0.307	1.7974	0	0.0917	0.2155	1.437166667	0.1024	-3.810939759	0.000658243	0.26510365	no	-	--	-	-	-	-
Unigene0024091	7	35.66666667	0.6491	0.632	1.4802	10.0721	3.0199	2.9573	0.920433333	5.349766667	2.539090832	0.000670026	0.268154051	no	-	--	-	-	-	-
Unigene0047904	40.66666667	0	2.9374	0	0	0	0	0	0.979133333	0.001	-9.935361522	0.000675161	0.268154051	no	HLA-DPB1	PREDICTED: H-2 class II histocompatibility antigen, I-E beta chain-like [Sinocyclocheilus anshuiensis]	ko04514//Cell adhesion molecules (CAMs)//Signaling molecules and interaction//Environmental Information Processing;ko04145//Phagosome//Transport and catabolism//Cellular Processes;ko04672//Intestinal immune network for IgA production//Immune system//Organismal Systems	GO:0042611//MHC protein complex;GO:0005886//plasma membrane;GO:0044464//cell part;GO:0098797//plasma membrane protein complex;GO:0043234//protein complex;GO:0005623//cell;GO:0098796//membrane protein complex;GO:0044425//membrane part;GO:0031224//intrinsic component of membrane;GO:0044459//plasma membrane part;GO:0071944//cell periphery;GO:0016020//membrane;GO:0032991//macromolecular complex	-	GO:0002376//immune system process;GO:0019882//antigen processing and presentation
Unigene0018092	2	16	0.096	0.2803	0.1989	1.561	0.8928	2.3607	0.191733333	1.604833333	3.065250397	0.00067793	0.268154051	no	-	--	-	-	-	-
Unigene0015967	18.66666667	74.66666667	0.2667	0.805	0.4147	1.2348	3.2261	2.017	0.495466667	2.1593	2.12370379	0.000680613	0.268154051	no	POL	PREDICTED: LOW QUALITY PROTEIN: paraneoplastic antigen Ma1, partial [Xiphophorus maculatus]	-	-	-	-
Unigene0006925	55.66666667	9	0.8717	0.9792	3.8571	0.2097	0.156	0.5498	1.902666667	0.305166667	-2.640353544	0.000687921	0.269568488	no	-	pol-like protein [Danio rerio]	-	-	-	-
Unigene0065052	0	10.66666667	0	0	0	2.1643	0	1.5759	0.001	1.246733333	10.2839372	0.000718134	0.279894728	no	-	--	-	-	-	-
Unigene0043741	139	408	0.5368	1.3804	0.4959	3.4754	2.5856	1.9511	0.804366667	2.6707	1.731292725	0.000732881	0.282127591	no	VCAN	PREDICTED: versican core protein-like [Sinocyclocheilus rhinocerous]	ko04514//Cell adhesion molecules (CAMs)//Signaling molecules and interaction//Environmental Information Processing	GO:0044421//extracellular region part;GO:0005576//extracellular region;GO:0031012//extracellular matrix	GO:0005539//glycosaminoglycan binding;GO:0097367//carbohydrate derivative binding;GO:0005488//binding	GO:0044707//single-multicellular organism process;GO:0044699//single-organism process;GO:0009987//cellular process;GO:0044767//single-organism developmental process;GO:0044763//single-organism cellular process;GO:0032501//multicellular organismal process;GO:0016477//cell migration;GO:0048731//system development;GO:0032502//developmental process;GO:0007275//multicellular organism development;GO:00…
Unigene0000911	11	43	0.5687	1.2655	0.8421	5.8961	2.6457	3.183	0.8921	3.908266667	2.131251565	0.000734549	0.282127591	no	-	--	-	-	-	-
Unigene0043436	35.33333333	166.3333333	1.6425	2.7983	2.8373	6.5938	29.0521	3.5542	2.426033333	13.0667	2.429223556	0.000738299	0.282127591	no	-	--	-	-	-	-
Unigene0028806	332.6666667	44.66666667	9.0157	1.1052	0.8796	0.8551	0.5127	0.3214	3.666833333	0.563066667	-2.703157042	0.00073943	0.282127591	no	GFRA4	PREDICTED: GDNF family receptor alpha-4-like [Sinocyclocheilus rhinocerous]	-	-	-	-
Unigene0047272	5	25.33333333	0.1029	0.5007	0.1599	1.2227	1.4355	1.5463	0.2545	1.4015	2.461234183	0.000744417	0.282543266	no	-	--	-	-	-	-
Unigene0011281	4.333333333	22.33333333	0.1865	0.4842	0.1289	1.7893	1.0846	1.6428	0.266533333	1.505566667	2.497918716	0.000751764	0.283845627	no	-	--	-	-	-	-
Unigene0050373	10	42.33333333	0.3924	0.6494	0.122	2.553	1.4147	1.573	0.387933333	1.8469	2.251225104	0.000765239	0.284969595	no	-	pol-like protein [Danio rerio]	-	-	-	-
Unigene0030133	32	105	1.1048	0.9302	0.8356	6.0527	2.4656	2.2309	0.956866667	3.583066667	1.904805073	0.000767218	0.284969595	no	-	--	-	-	-	-
Unigene0059429	0.333333333	8.666666667	0.1147	0	0	2.0085	1.0668	0.4179	0.038233333	1.1644	4.928611949	0.000768478	0.284969595	no	-	--	-	-	-	-
Unigene0007180	0	5.333333333	0	0	0	0.8355	0.5177	0.6084	0.001	0.653866667	9.352852668	0.000770464	0.284969595	no	-	--	-	-	-	-
Unigene0056128	2.333333333	17.33333333	0.0963	0.1875	0.3993	3.0128	0.8961	1.6673	0.2277	1.858733333	3.02911361	0.000783983	0.288497656	no	-	--	-	-	-	-
Unigene0066624	0.666666667	11	0	0	0.212	1.7914	0.4757	1.3976	0.070666667	1.221566667	4.111558931	0.000796096	0.290462475	no	Olfr1044	PREDICTED: olfactory receptor 52E4-like [Sinocyclocheilus rhinocerous]	-	GO:0044425//membrane part;GO:0031224//intrinsic component of membrane;GO:0016020//membrane	GO:0099600//transmembrane receptor activity;GO:0038023//signaling receptor activity;GO:0004871//signal transducer activity;GO:0004888//transmembrane signaling receptor activity;GO:0004872//receptor activity;GO:0060089//molecular transducer activity	GO:0007606//sensory perception of chemical stimulus;GO:0050794//regulation of cellular process;GO:0050896//response to stimulus;GO:0032501//multicellular organismal process;GO:0065007//biological regulation;GO:0003008//system process;GO:0007165//signal transduction;GO:0009987//cellular process;GO:0023052//signaling;GO:0044699//single-organism process;GO:0007600//sensory perception;GO:0044763//sin…
Unigene0029779	0.666666667	16.33333333	0.0793	0	0.0822	4.1674	0.3689	0.2167	0.053833333	1.584333333	4.879232332	0.000797335	0.290462475	no	-	--	-	-	-	-
Unigene0043877	61	246.6666667	1.1442	0.6463	0.8052	5.9918	0.8871	4.4659	0.865233333	3.7816	2.127835618	0.000824463	0.296022709	no	-	transposase-like [Salmo salar]	-	-	-	-
Unigene0022476	826	25.66666667	85.6558	0.8868	0.2542	0.1753	0.5297	1.9152	28.93226667	0.8734	-5.049893013	0.000825353	0.296022709	no	Sycn	PREDICTED: syncollin [Sinocyclocheilus anshuiensis]	-	-	-	-
Unigene0021806	23.66666667	4	1.2376	0.8675	1.4367	0.3097	0.2303	0.1353	1.1806	0.2251	-2.390882285	0.000827581	0.296022709	no	GJA8	PREDICTED: gap junction alpha-8 protein-like isoform X3 [Lates calcarifer]	-	GO:0016020//membrane;GO:0031224//intrinsic component of membrane;GO:0005911//cell-cell junction;GO:0044425//membrane part;GO:0005921//gap junction;GO:0030054//cell junction	-	GO:0044763//single-organism cellular process;GO:0009987//cellular process;GO:0044699//single-organism process
Unigene0065977	12.33333333	0	0	0.6886	2.2808	0	0	0	0.9898	0.001	-9.950993232	0.000828932	0.296022709	no	-	--	-	-	-	-
Unigene0072808	4.666666667	28.66666667	0.1078	0.3499	0.0372	2.2034	0.7105	0.6549	0.164966667	1.1896	2.850230106	0.000835877	0.296251798	notest	-	PREDICTED: nesprin-1 isoform X1 [Danio rerio]	-	-	-	-
Unigene0044246	68.66666667	228.3333333	2.0122	0.8824	0.8455	7.2133	2.4246	4.1623	1.2467	4.600066667	1.883540426	0.000840798	0.296251798	no	-	--	-	-	-	-
Unigene0023075	20	80.66666667	0.7661	2.0244	0.4537	7.5319	3.0549	4.1881	1.0814	4.924966667	2.187213699	0.000841833	0.296251798	no	-	--	-	-	-	-
Unigene0007310	14.33333333	60.66666667	0.6933	0.675	0.6228	1.0411	4.3006	3.5376	0.6637	2.959766667	2.156880266	0.000856899	0.300096848	no	-	PREDICTED: S-arrestin-like [Sinocyclocheilus grahami]	-	-	-	-
Unigene0014872	16	1	0.9697	0.295	1.6961	0.1517	0.0705	0	0.986933333	0.074066667	-3.736056319	0.000863391	0.300916822	no	ZBED1	PREDICTED: zinc finger BED domain-containing protein 1-like [Astyanax mexicanus]	-	-	-	-
Unigene0052069	86.33333333	367.3333333	0.3766	0.2901	0.4118	0.6681	0.6836	3.1338	0.3595	1.495166667	2.056242635	0.000888254	0.304546937	no	VWDE	PREDICTED: von Willebrand factor D and EGF domain-containing protein-like [Sinocyclocheilus rhinocerous]	-	-	-	-
Unigene0065995	3.333333333	20	0.1362	0.1326	0.4234	1.6187	0.9502	1.799	0.230733333	1.455966667	2.657678981	0.000891409	0.304546937	no	-	--	-	-	-	-
Unigene0024092	28.66666667	87.33333333	3.4052	4.1746	3.268	16.4124	8.9476	11.1464	3.615933333	12.1688	1.750746923	0.000892971	0.304546937	no	-	hypothetical protein N302_14822, partial [Corvus brachyrhynchos]	-	-	-	-
Unigene0033163	3264.666667	72	275.8807	0.9662	0.8817	0.2129	0.6926	4.8831	92.5762	1.929533333	-5.584317473	0.000895692	0.304546937	no	lce	PREDICTED: low choriolytic enzyme-like isoform X2 [Cyprinus carpio]	-	-	GO:0043169//cation binding;GO:0046872//metal ion binding;GO:0004175//endopeptidase activity;GO:0016787//hydrolase activity;GO:0043167//ion binding;GO:0008233//peptidase activity;GO:0070011//peptidase activity, acting on L-amino acid peptides;GO:0003824//catalytic activity;GO:0005488//binding;GO:0046914//transition metal ion binding	GO:0043170//macromolecule metabolic process;GO:0010467//gene expression;GO:0006508//proteolysis;GO:0016485//protein processing;GO:0071704//organic substance metabolic process;GO:0019538//protein metabolic process;GO:0051604//protein maturation;GO:0008152//metabolic process;GO:0044238//primary metabolic process
Unigene0017283	8.333333333	39.33333333	0.3851	0.2307	0.1228	2.0759	0.5513	1.2417	0.2462	1.289633333	2.389058272	0.00089747	0.304546937	no	MUC2	PREDICTED: mucin-2-like [Cyprinus carpio]	-	-	-	-
Unigene0019689	28547.33333	865.3333333	2824.7551	15.0031	17.1483	3.7565	11.1341	67.4405	952.3021667	27.4437	-5.116872509	0.000899013	0.304546937	no	Try3	trypsin 1 [Cyprinus carpio]	ko04080//Neuroactive ligand-receptor interaction//Signaling molecules and interaction//Environmental Information Processing	-	GO:0008233//peptidase activity;GO:0070011//peptidase activity, acting on L-amino acid peptides;GO:0003824//catalytic activity;GO:0016787//hydrolase activity;GO:0004175//endopeptidase activity	GO:0006508//proteolysis;GO:0019538//protein metabolic process;GO:0016485//protein processing;GO:0044238//primary metabolic process;GO:0051604//protein maturation;GO:0010467//gene expression;GO:0008152//metabolic process;GO:0043170//macromolecule metabolic process;GO:0071704//organic substance metabolic process
Unigene0061627	67.33333333	210.3333333	2.0788	1.6822	1.707	7.3307	9.8909	2.4353	1.822666667	6.5523	1.845950671	0.000917229	0.308032051	no	PSMB7	PSMB10 proteasome subunit beta type 10 [Oplegnathus fasciatus]	ko03050//Proteasome//Folding, sorting and degradation//Genetic Information Processing	GO:0005622//intracellular;GO:0043231//intracellular membrane-bounded organelle;GO:0000502//proteasome complex;GO:0043234//protein complex;GO:0043229//intracellular organelle;GO:0044424//intracellular part;GO:0005623//cell;GO:0043226//organelle;GO:0032991//macromolecular complex;GO:0044464//cell part;GO:0043227//membrane-bounded organelle	GO:0008233//peptidase activity;GO:0070011//peptidase activity, acting on L-amino acid peptides;GO:0003824//catalytic activity;GO:0004175//endopeptidase activity;GO:0016787//hydrolase activity	GO:0071704//organic substance metabolic process;GO:0043170//macromolecule metabolic process;GO:0044238//primary metabolic process;GO:0019538//protein metabolic process;GO:0008152//metabolic process;GO:0006508//proteolysis
Unigene0069498	2	14.33333333	0.0726	0.2119	0.1504	0.9988	1.7722	0.7272	0.144966667	1.166066667	3.00785716	0.000917799	0.308032051	no	-	PREDICTED: nesprin-1-like [Sinocyclocheilus rhinocerous]	-	-	-	-
Unigene0029753	8.333333333	32.33333333	0.3477	0.1538	0.2948	1.0282	1.1395	1.1519	0.265433333	1.106533333	2.05962545	0.000949593	0.314633552	no	-	PREDICTED: excitatory amino acid transporter 5-like [Sinocyclocheilus rhinocerous]	-	-	-	-
Unigene0012380	2.333333333	27	0.1818	0	0.2513	4.8535	0.8459	0.2761	0.144366667	1.991833333	3.786287358	0.00095168	0.314633552	no	-	--	-	-	-	-
Unigene0068126	0.666666667	9	0	0	0.2408	1.1628	1.2159	1.0584	0.080266667	1.1457	3.835284529	0.00095219	0.314633552	no	-	--	-	-	-	-
Unigene0069530	8.666666667	0.333333333	0.4013	1.0744	1.1438	0	0.1167	0	0.873166667	0.0389	-4.488414996	0.000954829	0.314633552	no	-	Retrovirus-related Pol polyprotein from transposon 297 [Larimichthys crocea]	-	-	-	-
Unigene0051092	0.666666667	29.33333333	0.162	0	0	0.2027	8.0069	0.0738	0.054	2.761133333	5.676157339	0.000970298	0.317097671	no	-	pG1 protein, partial [Homo sapiens]	-	-	-	-
Unigene0025022	35.33333333	659.3333333	1.1832	0.319	0.4339	0.7972	0.2752	32.0094	0.645366667	11.02726667	4.094812359	0.000972527	0.317097671	no	CKM	PREDICTED: creatine kinase M-type isoform X1 [Danio rerio]	ko01100//Metabolic pathways//Global and Overview//Metabolism;ko00330//Arginine and proline metabolism//Amino acid metabolism//Metabolism	-	GO:0001883//purine nucleoside binding;GO:0016772//transferase activity, transferring phosphorus-containing groups;GO:0097367//carbohydrate derivative binding;GO:1901363//heterocyclic compound binding;GO:0032550//purine ribonucleoside binding;GO:0097159//organic cyclic compound binding;GO:0032549//ribonucleoside binding;GO:0036094//small molecule binding;GO:0016740//transferase activity;GO:0005488…	GO:0009987//cellular process;GO:0044237//cellular metabolic process;GO:0008152//metabolic process;GO:0006796//phosphate-containing compound metabolic process;GO:0006793//phosphorus metabolic process
Unigene0007539	11.66666667	48.33333333	1.2752	1.0505	1.1184	10.4331	2.624	3.3069	1.148033333	5.454666667	2.248326505	0.000975429	0.317097671	no	-	--	-	-	-	-
Unigene0028060	0	5.666666667	0	0	0	0.6477	0.301	0.6288	0.001	0.525833333	9.038461789	0.000985745	0.318034227	no	-	pol-like protein [Tetraodon nigroviridis]	-	-	-	-
Unigene0024999	0	5	0	0	0	0.8244	0.7662	0.6003	0.001	0.7303	9.51234542	0.000987931	0.318034227	no	-	PREDICTED: uncharacterized protein LOC109202850 [Oreochromis niloticus]	-	-	-	-
Unigene0005381	76	263.6666667	1.3341	5.7299	1.7894	17.2821	9.1725	8.5086	2.951133333	11.6544	1.981533724	0.000991472	0.318034227	no	-	PREDICTED: uncharacterized protein LOC107395943 [Nothobranchius furzeri]	-	-	-	-
Unigene0017174	0	16.66666667	0	0	0	0.132	6.0134	0	0.001	2.048466667	11.0003287	0.00100936	0.322346161	no	-	--	-	-	-	-
Unigene0014671	0.666666667	11	0	0	0.1716	0.6214	0.5776	1.5836	0.0572	0.927533333	4.019312078	0.001029096	0.327207362	no	-	PREDICTED: golgin subfamily B member 1-like [Cyprinus carpio]	-	-	-	-
Unigene0041894	146.6666667	3	29.2271	0.1302	0.0693	0	0.1556	0.4266	9.808866667	0.194066667	-5.659462211	0.001056412	0.334425867	no	PRF1	PREDICTED: perforin-1-like [Sinocyclocheilus rhinocerous]	-	-	-	-
Unigene0023820	0	26.66666667	0	0	0	0	0	3.007	0.001	1.002333333	9.969146652	0.001064555	0.335538634	no	ORF3	--	-	-	-	-
Unigene0050699	265	66.66666667	3.6553	3.7823	9.3957	2.4306	0.8502	1.3702	5.6111	1.550333333	-1.855705185	0.001072854	0.336690284	no	-	PREDICTED: uncharacterized protein LOC107569435 [Sinocyclocheilus grahami]	-	-	-	-
Unigene0008552	12	59	0.7769	0.1719	0.3294	4.8164	0.9446	1.4479	0.426066667	2.402966667	2.495665544	0.001113084	0.346943816	no	-	--	-	-	-	-
Unigene0001670	1.333333333	15.33333333	0	0.2803	0	2.2514	1.2556	0.3934	0.093433333	1.300133333	3.798578436	0.001116501	0.346943816	no	-	--	-	-	-	-
Unigene0040770	10.66666667	0	0.9726	1.3839	0	0	0	0	0.7855	0.001	-9.617467465	0.001119884	0.346943816	no	-	--	-	-	-	-
Unigene0028706	0	15.66666667	0	0	0	0.2511	0	4.1133	0.001	1.4548	10.50660512	0.001131761	0.349077325	no	-	--	-	-	-	-
Unigene0044818	29.33333333	0	2.7879	0	0	0	0	0	0.9293	0.001	-9.860000598	0.001136621	0.349077325	no	H2-Aa	major histocompatibility complex class II integral membrane alpha chain precursor [Danio rerio]	ko04514//Cell adhesion molecules (CAMs)//Signaling molecules and interaction//Environmental Information Processing;ko04145//Phagosome//Transport and catabolism//Cellular Processes;ko04672//Intestinal immune network for IgA production//Immune system//Organismal Systems	GO:0016020//membrane;GO:0044425//membrane part	-	GO:0002376//immune system process
Unigene0016447	6.666666667	34.33333333	0.1358	0.7273	0.4927	5.0985	1.3427	1.6088	0.451933333	2.683333333	2.569844407	0.001141216	0.349077325	no	-	--	-	-	-	-
Unigene0032623	11.66666667	0	2.292	0.6611	0	0	0	0	0.984366667	0.001	-9.943051995	0.001171726	0.356903864	no	-	--	-	-	-	-
Unigene0029528	19.33333333	0	0	2.6674	0.0498	0	0	0	0.905733333	0.001	-9.822942543	0.001209368	0.366828183	no	Ctsz	PREDICTED: LOW QUALITY PROTEIN: cathepsin Z-like [Cyprinus carpio]	ko04142//Lysosome//Transport and catabolism//Cellular Processes	-	GO:0008233//peptidase activity;GO:0016787//hydrolase activity;GO:0003824//catalytic activity;GO:0070011//peptidase activity, acting on L-amino acid peptides	GO:0009653//anatomical structure morphogenesis;GO:0048856//anatomical structure development;GO:0048646//anatomical structure formation involved in morphogenesis;GO:0032502//developmental process
Unigene0027195	46.66666667	138.3333333	0.8403	1.7342	2.1599	6.8972	4.9254	3.828	1.578133333	5.216866667	1.72496446	0.001221143	0.368856383	no	-	--	-	-	-	-
Unigene0050372	2.333333333	16.66666667	0.3918	0	0.1624	2.3532	1.1847	0.9281	0.184733333	1.488666667	3.010504635	0.001241475	0.373441872	no	-	pol-like protein [Danio rerio]	ko03410//Base excision repair//Replication and repair//Genetic Information Processing	-	-	-
Unigene0014893	0.333333333	45	0.059	0	0	0	0	7.2556	0.019666667	2.418533333	6.942236158	0.001277171	0.381795114	no	-	--	-	-	-	-
Unigene0064675	0	5	0	0	0	0.6695	0.5186	0.325	0.001	0.504366667	8.978329122	0.001280248	0.381795114	no	-	--	-	-	-	-
Unigene0015976	27.33333333	4.333333333	1.3914	0.3737	2.2379	0.1801	0.2232	0.2623	1.334333333	0.221866667	-2.588354277	0.001285044	0.381795114	no	-	--	-	-	-	-
Unigene0071574	0	5.333333333	0	0	0	0.9653	0.4486	0.82	0.001	0.744633333	9.540386389	0.001298555	0.383377212	no	NECAB1	PREDICTED: LOW QUALITY PROTEIN: N-terminal EF-hand calcium-binding protein 1-like [Cyprinus carpio]	-	-	-	-
Unigene0016016	11.66666667	43.66666667	0.7309	0.4186	0.3565	3.5508	1.7002	1.2144	0.502	2.155133333	2.102017859	0.001300946	0.383377212	no	-	--	-	-	-	-
Unigene0014704	3.666666667	22.33333333	0.2635	0.0641	0.4097	2.061	0.6896	1.9809	0.245766667	1.577166667	2.681973963	0.001315288	0.386034364	no	-	--	-	-	-	-
Unigene0040599	95.33333333	285.6666667	1.3314	0.8555	0.3404	2.7099	2.3742	3.0973	0.842433333	2.727133333	1.69475081	0.001324499	0.386957276	no	Crb2	PREDICTED: protein crumbs homolog 2-like [Sinocyclocheilus rhinocerous]	-	GO:0032991//macromolecular complex;GO:0016020//membrane	-	GO:0050789//regulation of biological process;GO:0007275//multicellular organism development;GO:0051179//localization;GO:0098602//single organism cell adhesion;GO:0022610//biological adhesion;GO:0007163//establishment or maintenance of cell polarity;GO:0007165//signal transduction;GO:0048598//embryonic morphogenesis;GO:0044700//single organism signaling;GO:0007166//cell surface receptor signaling …
Unigene0035645	2.333333333	14.33333333	0.0619	0.241	0.1283	1.2389	0.9356	0.7893	0.143733333	0.987933333	2.781019013	0.001334047	0.386957276	no	-	--	-	-	-	-
Unigene0009557	26.33333333	130.3333333	0.5098	0.6145	0.8052	0.4556	4.9692	4.4237	0.643166667	3.282833333	2.351676964	0.001334446	0.386957276	no	sag	PREDICTED: S-arrestin-like [Sinocyclocheilus rhinocerous]	ko04744//Phototransduction//Sensory system//Organismal Systems	-	-	-
Unigene0058705	7.666666667	0.333333333	1.048	0.5565	0.5925	0.1192	0	0	0.732333333	0.039733333	-4.204078729	0.001381168	0.398909994	no	-	PREDICTED: protocadherin-15-like [Sinocyclocheilus grahami]	-	-	-	-
Unigene0069020	10	0	0.8115	0	1.4528	0	0	0	0.754766667	0.001	-9.559886899	0.001400471	0.400181697	no	-	--	-	-	-	-
Unigene0022865	1	10.33333333	0	0.156	0	0.6013	0.5589	0.6325	0.052	0.597566667	3.522516146	0.001404419	0.400181697	no	-	--	-	-	-	-
Unigene0050216	1.333333333	11.66666667	0	0.3119	0.1107	1.6036	0.8694	1.5569	0.140866667	1.3433	3.253379367	0.001405863	0.400181697	no	-	--	-	-	-	-
Unigene0016981	14.33333333	1.666666667	1.0148	0.2964	0.894	0.0635	0.118	0.0925	0.735066667	0.091333333	-3.008661708	0.001407652	0.400181697	no	-	PREDICTED: interferon regulatory factor 1-like [Cyprinus carpio]	-	-	GO:0005488//binding;GO:0003676//nucleic acid binding;GO:0097159//organic cyclic compound binding;GO:1901363//heterocyclic compound binding	GO:0010467//gene expression;GO:1901360//organic cyclic compound metabolic process;GO:0006351//transcription, DNA-templated;GO:0043170//macromolecule metabolic process;GO:0009987//cellular process;GO:0009058//biosynthetic process;GO:0034645//cellular macromolecule biosynthetic process;GO:1901362//organic cyclic compound biosynthetic process;GO:0044238//primary metabolic process;GO:0034641//cellula…
Unigene0063322	3	17	0.3668	0.2857	0	1.0098	1.7919	1.2701	0.2175	1.357266667	2.641616894	0.001416777	0.401202571	no	-	--	-	-	-	-
Unigene0025023	23	399.6666667	0.9293	0.5089	0.5719	0.4361	0.304	31.1698	0.670033333	10.63663333	3.988664907	0.001449288	0.408811939	no	CKM	PREDICTED: creatine kinase M-type-like [Sinocyclocheilus grahami]	ko01100//Metabolic pathways//Global and Overview//Metabolism;ko00330//Arginine and proline metabolism//Amino acid metabolism//Metabolism	-	GO:1901363//heterocyclic compound binding;GO:0032550//purine ribonucleoside binding;GO:0001883//purine nucleoside binding;GO:0001882//nucleoside binding;GO:0016740//transferase activity;GO:0003824//catalytic activity;GO:0036094//small molecule binding;GO:0032549//ribonucleoside binding;GO:0016772//transferase activity, transferring phosphorus-containing groups;GO:0097159//organic cyclic compound …	GO:0006796//phosphate-containing compound metabolic process;GO:0044237//cellular metabolic process;GO:0006793//phosphorus metabolic process;GO:0008152//metabolic process;GO:0009987//cellular process
Unigene0022032	30	517.3333333	2.5871	0.9819	0.3636	0.823	1.173	60.4885	1.310866667	20.82816667	3.989943	0.001475891	0.414604308	no	pvalb2	parvalbumin 1 [Carassius auratus]	-	-	GO:0043169//cation binding;GO:0005488//binding;GO:0043167//ion binding;GO:0046872//metal ion binding	-
Unigene0035148	15	57.66666667	0.2895	1.0567	0.2625	2.0373	3.2823	1.6483	0.536233333	2.322633333	2.11482861	0.001484896	0.414604308	no	-	--	-	-	-	-
Unigene0034064	1.333333333	19	0.0838	0	0.2606	0.6292	4.5815	0.3055	0.1148	1.838733333	4.001517718	0.001489346	0.414604308	no	-	--	-	-	-	-
Unigene0069085	10.66666667	0.333333333	0.092	0.9848	0.3813	0.0575	0	0	0.486033333	0.019166667	-4.6643839	0.001499187	0.414604308	no	-	PREDICTED: LOW QUALITY PROTEIN: immunoglobulin superfamily member 10-like [Sinocyclocheilus anshuiensis]	-	-	-	-
Unigene0001449	206	2001	2.1353	0.9536	0.9543	0.6537	2.2024	33.5139	1.347733333	12.12333333	3.169179451	0.001502685	0.414604308	no	MYH4	myosin heavy chain b [Culter alburnus]	ko04530//Tight junction//Cellular commiunity//Cellular Processes	GO:0043229//intracellular organelle;GO:0043228//non-membrane-bounded organelle;GO:0015629//actin cytoskeleton;GO:0005623//cell;GO:0005622//intracellular;GO:0044424//intracellular part;GO:0043232//intracellular non-membrane-bounded organelle;GO:0043226//organelle;GO:0044464//cell part;GO:0005856//cytoskeleton	GO:0001882//nucleoside binding;GO:0017111//nucleoside-triphosphatase activity;GO:0016818//hydrolase activity, acting on acid anhydrides, in phosphorus-containing anhydrides;GO:0016787//hydrolase activity;GO:0016817//hydrolase activity, acting on acid anhydrides;GO:0005488//binding;GO:0005515//protein binding;GO:0016462//pyrophosphatase activity;GO:0032550//purine ribonucleoside binding;GO:0001883…	-
Unigene0047762	50.66666667	173.3333333	1.1359	2.8229	0.5267	7.9298	4.3806	4.957	1.495166667	5.7558	1.944710152	0.001504137	0.414604308	no	-	--	-	-	-	-
Unigene0071935	6	27	0.4414	0.4297	0.1144	2.7617	1.0909	1.2066	0.3285	1.6864	2.359981496	0.001512435	0.415312487	no	-	--	-	-	-	-
Unigene0007956	3	14.66666667	0.373	0.3632	0.3866	2.0227	2.6031	1.4728	0.374266667	2.032866667	2.441377125	0.001542876	0.422072584	no	-	--	-	-	-	-
Unigene0025041	6	26	0.1924	0.2497	0.7311	2.4073	1.4171	1.6945	0.391066667	1.839633333	2.233931769	0.001565486	0.426647863	no	-	hypothetical protein A306_05159, partial [Columba livia]	-	-	-	-
Unigene0058129	20.66666667	68.66666667	1.7657	1.6115	3.5458	9.9421	11.1661	4.7257	2.307666667	8.6113	1.899796202	0.001581748	0.429465436	no	-	--	-	-	-	-
Unigene0026380	5	21.66666667	0.4272	0.5198	0.6641	2.6726	1.6147	3.1137	0.537033333	2.467	2.199674172	0.001589754	0.430028397	no	-	--	-	-	-	-
Unigene0066094	0.333333333	6.666666667	0	0.1228	0	1.1047	0.5867	1.0342	0.040933333	0.908533333	4.472191387	0.001596465	0.430238285	no	-	--	-	-	-	-
Unigene0050311	39	169	0.4776	0.9998	1.3367	6.8432	0.8333	5.3964	0.938033333	4.357633333	2.215833713	0.001623941	0.43602217	no	BTN2A2	PREDICTED: E3 ubiquitin/ISG15 ligase TRIM25-like [Cyprinus carpio]	-	-	GO:0043169//cation binding;GO:0046914//transition metal ion binding;GO:0005488//binding;GO:0046872//metal ion binding;GO:0043167//ion binding	-
Unigene0035024	22.33333333	2.666666667	0.3838	1.388	1.9324	0.1372	0.3189	0.05	1.234733333	0.1687	-2.871667616	0.001632867	0.436800917	no	-	--	-	-	-	-
Unigene0049547	25	166.3333333	1.0721	0	0.4321	5.4654	4.6874	1.3748	0.5014	3.842533333	2.938023874	0.001648634	0.439397227	no	rnf19b	PREDICTED: probable E3 ubiquitin-protein ligase ARI7 [Sinocyclocheilus grahami]	-	-	-	-
Unigene0015713	24	4.666666667	1.2385	0.6029	1.6293	0.1788	0.277	0.2604	1.1569	0.238733333	-2.276792243	0.001665117	0.442164844	no	-	ReO_6 [Oryzias latipes]	ko03015//mRNA surveillance pathway//Translation//Genetic Information Processing	-	-	-
Unigene0033268	3.333333333	23	0.6428	0.2503	0.3998	0.4826	4.4859	4.2171	0.430966667	3.061866667	2.828763267	0.001686842	0.446298875	no	-	PREDICTED: S-antigen protein-like [Cavia porcellus]	-	-	-	-
Unigene0014721	0.333333333	7.666666667	0	0	0.122	1.4729	1.369	0.3218	0.040666667	1.054566667	4.696659749	0.001710932	0.450745076	no	-	--	-	-	-	-
Unigene0005648	5.666666667	29.66666667	0.2778	0.0902	1.2478	3.0128	3.1234	2.8688	0.5386	3.001666667	2.47847764	0.001716082	0.450745076	no	-	--	-	-	-	-
Unigene0009633	214	620.6666667	1.2462	0.6695	0.5237	5.063	2.015	1.1804	0.813133333	2.7528	1.759335955	0.001769105	0.462994579	no	Gvin1	PREDICTED: interferon-induced very large GTPase 1-like [Lepisosteus oculatus]	-	-	-	-
Unigene0064486	14.66666667	53	0.3862	0.1612	0.6863	1.5535	1.2835	1.8601	0.411233333	1.5657	1.928778693	0.001808325	0.471556474	no	-	--	-	-	-	-
Unigene0051305	216	522.3333333	1.244	0.8994	0.8248	2.1346	2.0638	3.3587	0.9894	2.519033333	1.348244408	0.00183437	0.476243917	no	PTCHD2	PREDICTED: protein dispatched homolog 3-like [Sinocyclocheilus rhinocerous]	-	-	-	-
Unigene0070952	2.666666667	15	0.231	0.1499	0.2394	2.0231	0.8954	0.9821	0.206766667	1.3002	2.65265803	0.001839439	0.476243917	no	-	--	-	-	-	-
Unigene0070880	9.666666667	38.33333333	0.325	0.58	0.6736	3.6597	2.7717	0.8389	0.5262	2.423433333	2.203369242	0.001866961	0.480141303	no	-	PREDICTED: uncharacterized protein LOC109095791 [Cyprinus carpio]	-	-	-	-
Unigene0022605	6.333333333	35.33333333	0.398	0.2113	0.075	3.3503	0.7995	0.4286	0.2281	1.526133333	2.74214266	0.001867739	0.480141303	no	gpt2	PREDICTED: alanine aminotransferase 2-like [Sinocyclocheilus grahami]	ko01100//Metabolic pathways//Global and Overview//Metabolism;ko01120//Microbial metabolism in diverse environments//Global and Overview//Metabolism;ko01200//Carbon metabolism//Global and Overview//Metabolism;ko01230//Biosynthesis of amino acids//Global and Overview//Metabolism;ko00250//Alanine, aspartate and glutamate metabolism//Amino acid metabolism//Metabolism;ko00220//Arginine biosynthesis//A…	-	-	-
Unigene0008548	75.33333333	15.33333333	3.1847	1.802	1.1567	0.0681	0.6965	0.5456	2.0478	0.436733333	-2.229250267	0.001885882	0.482135482	no	TMEM116	PREDICTED: transmembrane protein 116-like [Cyprinus carpio]	-	-	-	-
Unigene0046453	18	1	1.4421	0.1027	0.3646	0.044	0.0818	0	0.636466667	0.041933333	-3.923915537	0.00189396	0.482135482	no	tmx3	PREDICTED: protein disulfide-isomerase TMX3-like isoform X1 [Sinocyclocheilus grahami]	-	GO:0016020//membrane;GO:0044425//membrane part;GO:0031224//intrinsic component of membrane	GO:0016491//oxidoreductase activity;GO:0016667//oxidoreductase activity, acting on a sulfur group of donors;GO:0003824//catalytic activity;GO:0015036//disulfide oxidoreductase activity	GO:0048856//anatomical structure development;GO:0019725//cellular homeostasis;GO:0048731//system development;GO:0018904//ether metabolic process;GO:0044699//single-organism process;GO:0008152//metabolic process;GO:0044763//single-organism cellular process;GO:0032501//multicellular organismal process;GO:0065008//regulation of biological quality;GO:0065007//biological regulation;GO:0009987//cellula…
Unigene0034649	0.666666667	8	0.2609	0	0	1.1428	1.0622	1.1887	0.086966667	1.131233333	3.701290188	0.001895448	0.482135482	no	-	--	-	-	-	-
Unigene0012037	5.333333333	26	0.0516	0.5529	0.214	2.1318	0.9007	1.4112	0.272833333	1.481233333	2.4407071	0.001910247	0.484200902	no	-	--	-	-	-	-
Unigene0048730	17.33333333	71.66666667	1.6836	0.1261	1.6108	5.1048	6.0251	4.2481	1.140166667	5.126	2.168588749	0.001944884	0.489527046	no	-	hypothetical protein cypCar_00040387 [Cyprinus carpio]	-	-	-	-
Unigene0051186	7.333333333	0.333333333	1.3488	0.5969	0.7625	0	0	0.1117	0.902733333	0.037233333	-4.599633195	0.001947091	0.489527046	no	-	--	-	-	-	-
Unigene0023272	7.333333333	37.66666667	1.3807	0.2444	1.1709	10.8374	1.7518	3.6597	0.932	5.4163	2.53890579	0.001951518	0.489527046	no	-	--	-	-	-	-
Unigene0042004	3.666666667	20.66666667	0	0.6181	0.376	3.1778	1.0549	1.9834	0.331366667	2.072033333	2.644546823	0.001989921	0.497439102	no	-	--	-	-	-	-
Unigene0028597	1.666666667	13.33333333	0.1376	0.2009	0	1.7216	0.48	0.8775	0.112833333	1.026366667	3.185280984	0.002008732	0.500415896	no	-	--	-	-	-	-
Unigene0049683	4	17.33333333	0.2251	0.2191	0.4666	1.4082	1.658	1.2305	0.3036	1.432233333	2.238022854	0.002049832	0.508905902	no	-	--	-	-	-	-
Unigene0072627	9	0.666666667	1.648	0.9168	0.61	0.1473	0.1369	0	1.058266667	0.094733333	-3.481687251	0.002061967	0.510171552	notest	-	--	-	-	-	-
Unigene0063673	0	5	0	0	0	1.1153	0.2962	0.6961	0.001	0.702533333	9.456422869	0.002069636	0.510327192	no	-	--	-	-	-	-
Unigene0028563	10.66666667	0	0	1.2066	0.2379	0	0	0	0.4815	0.001	-8.911391988	0.002079371	0.510989529	no	-	PREDICTED: granzyme-like protein 1 [Cyprinus carpio]	-	-	-	-
Unigene0018181	2.333333333	45.66666667	0.07	0.0341	0.1451	0.0876	0.0814	4.2397	0.083066667	1.469566667	4.144977335	0.002115368	0.518079316	no	pol	PREDICTED: uncharacterized protein LOC102193952 [Pundamilia nyererei]	-	-	-	-
Unigene0033655	26.33333333	84.33333333	0.2024	0.1396	0.3321	0.517	0.7061	1.0141	0.2247	0.745733333	1.730659705	0.002165804	0.528645856	no	mmp11	PREDICTED: stromelysin-3-like [Sinocyclocheilus rhinocerous]	-	-	-	-
Unigene0004298	2032.666667	76.33333333	171.8115	0.7746	0.7069	0.4623	0.4958	5.2043	57.76433333	2.054133333	-4.813577239	0.002207475	0.537009016	no	CELA2A	PREDICTED: chymotrypsin-like elastase family member 2A [Sinocyclocheilus grahami]	-	-	GO:0016787//hydrolase activity;GO:0070011//peptidase activity, acting on L-amino acid peptides;GO:0008233//peptidase activity;GO:0003824//catalytic activity	GO:0071704//organic substance metabolic process;GO:0019538//protein metabolic process;GO:0051604//protein maturation;GO:0043170//macromolecule metabolic process;GO:0044238//primary metabolic process;GO:0016485//protein processing;GO:0006508//proteolysis;GO:0008152//metabolic process;GO:0010467//gene expression
Unigene0000697	18.33333333	1.333333333	0.1388	0.4393	1.3672	0.0434	0.1211	0	0.648433333	0.054833333	-3.563833173	0.002216856	0.537487513	no	-	vacuolar protein sorting 52 [Salmo salar]	-	-	-	-
Unigene0068472	7.666666667	33	0.2969	0.8094	0.2462	2.3035	1.036	2.8676	0.450833333	2.069033333	2.198290795	0.002257289	0.543992897	no	-	--	-	-	-	-
Unigene0067314	22.66666667	573	1.8203	0.7975	0.4717	0.5694	0.1059	70.7773	1.029833333	23.81753333	4.53154123	0.002262106	0.543992897	no	pvalb2	PREDICTED: parvalbumin beta-like [Cyprinus carpio]	-	-	GO:0043169//cation binding;GO:0005488//binding;GO:0046872//metal ion binding;GO:0043167//ion binding	-
Unigene0063279	2.666666667	13.33333333	0.0654	0.3183	0.1356	1.0638	0.9887	0.8342	0.1731	0.962233333	2.474781053	0.002266199	0.543992897	no	-	--	-	-	-	-
Unigene0054307	0	4.666666667	0	0	0	0.4222	0.2943	0.538	0.001	0.418166667	8.707934255	0.002294841	0.54726968	no	-	--	-	-	-	-
Unigene0059890	8	31.33333333	0.3805	1.0373	0.3944	2.476	4.0717	1.5256	0.604066667	2.6911	2.155416318	0.002294948	0.54726968	no	-	--	-	-	-	-
Unigene0063768	1.666666667	11	0.164	0.0798	0.17	0.7182	1.049	1.1207	0.137933333	0.962633333	2.803015236	0.002330745	0.552744078	no	-	--	-	-	-	-
Unigene0034895	160.3333333	399	1.6773	1.5938	1.5719	3.0916	3.3058	6.1129	1.614333333	4.1701	1.369143478	0.002340691	0.552744078	no	Npnt	PREDICTED: nephronectin-like isoform X3 [Sinocyclocheilus rhinocerous]	-	-	GO:0046872//metal ion binding;GO:0005488//binding;GO:0043169//cation binding;GO:0043167//ion binding	GO:0007507//heart development;GO:0007275//multicellular organism development;GO:0072359//circulatory system development;GO:0044767//single-organism developmental process;GO:0003205//cardiac chamber development;GO:0048731//system development;GO:0048513//animal organ development;GO:0009653//anatomical structure morphogenesis;GO:0003007//heart morphogenesis;GO:0032501//multicellular organismal proce…
Unigene0066318	0	4.666666667	0	0	0	0.478	0.8886	0.5801	0.001	0.6489	9.341852356	0.002344253	0.552744078	no	-	--	-	-	-	-
Unigene0007132	30.66666667	7	1.1435	0.7221	0.993	0.2707	0.2875	0.1689	0.952866667	0.242366667	-1.975083059	0.002348404	0.552744078	no	POL	PREDICTED: protein NYNRIN-like, partial [Nothobranchius furzeri]	-	-	-	-
Unigene0014495	0.666666667	8	0.0643	0	0.0666	0.8044	0.2991	0.5857	0.043633333	0.563066667	3.68980315	0.002367269	0.553550986	no	-	--	-	-	-	-
Unigene0046328	128.6666667	23.66666667	0.2401	3.6668	1.8508	0.2816	0.4538	0.4102	1.919233333	0.381866667	-2.329389223	0.002370895	0.553550986	no	-	PREDICTED: uncharacterized protein LOC102081651 [Oreochromis niloticus]	-	-	-	-
Unigene0062906	0.666666667	8.333333333	0.0999	0.0973	0	1.5007	0.465	0.8196	0.065733333	0.928433333	3.820101269	0.002374739	0.553550986	no	-	--	-	-	-	-
Unigene0035212	8	30.66666667	0.248	0.6277	0.3084	2.3583	2.0766	0.8134	0.3947	1.749433333	2.148059264	0.002414434	0.559546134	no	-	--	-	-	-	-
Unigene0005382	31	91.33333333	1.4809	2.4398	1.3578	8.3385	3.2459	5.6047	1.7595	5.7297	1.703294089	0.002415932	0.559546134	no	-	PREDICTED: uncharacterized protein LOC107395943 [Nothobranchius furzeri]	-	-	-	-
Unigene0009540	21.33333333	59.33333333	0.4185	0.388	0.4751	1.5211	1.1357	1.2347	0.4272	1.297166667	1.602380304	0.002429822	0.559546134	no	-	PREDICTED: trichohyalin-like isoform X1 [Sinocyclocheilus anshuiensis]	-	-	-	-
Unigene0027916	0	4.666666667	0	0	0	0.8467	0.3373	0.3523	0.001	0.5121	9.000281749	0.002435192	0.559546134	no	-	--	-	-	-	-
Unigene0001388	0	18.33333333	0	0	0	0	0	3.8249	0.001	1.274966667	10.31624381	0.002439891	0.559546134	no	ORF3	--	-	-	-	-
Unigene0058487	21.66666667	3.333333333	1.0058	0.5222	2.9189	0.1678	0.2339	0.3055	1.4823	0.235733333	-2.652609782	0.002448737	0.559546134	no	-	Pol polyprotein [Dicentrarchus labrax]	-	-	-	-
Unigene0024904	29	243	0.327	0.3491	0.2405	0.2112	0.3926	6.5446	0.305533333	2.3828	2.963256174	0.002458747	0.559546134	no	atp2a1	PREDICTED: sarcoplasmic/endoplasmic reticulum calcium ATPase 1 isoform X1 [Sinocyclocheilus anshuiensis]	ko04020//Calcium signaling pathway//Signal transduction//Environmental Information Processing	GO:0016020//membrane;GO:0031224//intrinsic component of membrane;GO:0044425//membrane part	GO:0022804//active transmembrane transporter activity;GO:0015405//P-P-bond-hydrolysis-driven transmembrane transporter activity;GO:0016817//hydrolase activity, acting on acid anhydrides;GO:0016820//hydrolase activity, acting on acid anhydrides, catalyzing transmembrane movement of substances;GO:0016818//hydrolase activity, acting on acid anhydrides, in phosphorus-containing anhydrides;GO:0015075/…	GO:0044699//single-organism process;GO:0072511//divalent inorganic cation transport;GO:0006811//ion transport;GO:0030001//metal ion transport;GO:0070838//divalent metal ion transport;GO:0044765//single-organism transport;GO:0051179//localization;GO:0051234//establishment of localization;GO:1902578//single-organism localization;GO:0006812//cation transport;GO:0006810//transport;GO:0006816//calcium…
Unigene0066068	0	5	0	0	0	0.805	0.2494	0.6839	0.001	0.579433333	9.178498871	0.002462207	0.559546134	no	-	hypothetical protein cypCar_00042598 [Cyprinus carpio]	-	-	-	-
Unigene0058440	0.333333333	6.333333333	0	0	0.0871	0.6312	0.3912	0.6895	0.029033333	0.570633333	4.296781901	0.002501216	0.566634766	no	Tf2-11	Retrotransposable element Tf2 protein type 1 [Larimichthys crocea]	-	-	-	-
Unigene0025231	1157.666667	67	76.6624	0.7016	0.8637	0.8172	3.5361	0.7592	26.0759	1.704166667	-3.935578705	0.00255051	0.5749486	no	Apcs	PREDICTED: jeltraxin-like [Sinocyclocheilus grahami]	-	-	-	-
Unigene0005467	7.666666667	58.33333333	0.1612	0.3532	0.4178	0.3027	0.797	5.5829	0.310733333	2.227533333	2.841698103	0.002553776	0.5749486	no	-	--	-	-	-	-
Unigene0068601	16.33333333	0.666666667	0.4766	0	0.6586	0.0568	0	0	0.3784	0.018933333	-4.320911755	0.002568855	0.575091065	no	-	--	-	-	-	-
Unigene0027308	10.66666667	33.33333333	0.1409	0.2351	0.2712	0.8058	0.749	0.6601	0.215733333	0.7383	1.774958051	0.002570275	0.575091065	no	-	PREDICTED: nesprin-2-like [Sinocyclocheilus anshuiensis]	-	-	-	-
Unigene0052622	35.33333333	94.66666667	1.1959	1.6779	0.8385	4.4891	4.2134	2.5317	1.237433333	3.744733333	1.597512184	0.002609045	0.580397708	no	-	PREDICTED: CD48 antigen-like [Sinocyclocheilus grahami]	-	-	-	-
Unigene0010040	241.6666667	30.66666667	16.3712	0.3481	1.853	0.5752	0.802	1.0937	6.190766667	0.823633333	-2.910043961	0.002610004	0.580397708	no	DPT	PREDICTED: hemagglutinin/amebocyte aggregation factor-like [Cyprinus carpio]	-	-	-	-
Unigene0003684	61.66666667	158.3333333	1.0295	2.0956	1.1883	3.4838	4.5443	4.029	1.4378	4.019033333	1.482985534	0.002633336	0.583795376	no	-	--	-	-	-	-
Unigene0023990	15.66666667	2.666666667	1.2131	0.9841	0.9779	0.253	0.1568	0.1842	1.058366667	0.198	-2.418267194	0.002677031	0.591672913	no	-	--	-	-	-	-
Unigene0012004	18.33333333	168.6666667	0.8728	0.3595	0.6263	0.504	0.7027	14.5584	0.619533333	5.255033333	3.084446103	0.002694066	0.593628062	no	TNNI2	PREDICTED: troponin I, fast skeletal muscle-like [Cyprinus carpio]	-	GO:0005623//cell;GO:0044422//organelle part;GO:0043232//intracellular non-membrane-bounded organelle;GO:0005622//intracellular;GO:0044430//cytoskeletal part;GO:0030016//myofibril;GO:0036379//myofilament;GO:0043228//non-membrane-bounded organelle;GO:0005865//striated muscle thin filament;GO:0043229//intracellular organelle;GO:0043226//organelle;GO:0005737//cytoplasm;GO:0044449//contractile fiber p…	-	GO:0009987//cellular process;GO:0010927//cellular component assembly involved in morphogenesis;GO:0016043//cellular component organization;GO:0032989//cellular component morphogenesis;GO:0044699//single-organism process;GO:0044767//single-organism developmental process;GO:0009653//anatomical structure morphogenesis;GO:0032502//developmental process;GO:0071840//cellular component organization or b…
Unigene0066200	14.33333333	66	0.4451	0.5417	3.9216	11.2789	9.448	4.4613	1.636133333	8.396066667	2.359423299	0.002737456	0.598586438	no	-	--	-	-	-	-
Unigene0069023	3	27	0.2251	0	0.1166	0.0939	1.9197	1.1963	0.1139	1.069966667	3.2317262	0.002742033	0.598586438	no	BCO2	PREDICTED: beta,beta-carotene 9',10'-oxygenase-like [Cyprinus carpio]	-	GO:0043229//intracellular organelle;GO:0043227//membrane-bounded organelle;GO:0005623//cell;GO:0044424//intracellular part;GO:0043231//intracellular membrane-bounded organelle;GO:0043226//organelle;GO:0044464//cell part;GO:0005622//intracellular	GO:0016702//oxidoreductase activity, acting on single donors with incorporation of molecular oxygen, incorporation of two atoms of oxygen;GO:0003824//catalytic activity;GO:0016491//oxidoreductase activity;GO:0016701//oxidoreductase activity, acting on single donors with incorporation of molecular oxygen;GO:0010436//carotenoid dioxygenase activity;GO:0051213//dioxygenase activity	GO:0044710//single-organism metabolic process;GO:0044699//single-organism process;GO:0008152//metabolic process
Unigene0061212	7.666666667	29	0.5592	0.3464	0.2634	2.6716	1.6554	0.7874	0.389666667	1.7048	2.129290069	0.002743326	0.598586438	no	-	PREDICTED: zinc finger protein 124-like isoform X3 [Cyprinus carpio]	-	-	-	-
Unigene0005112	3.666666667	22	0.1273	0.4339	0.132	0.8763	3.4802	0.4641	0.231066667	1.606866667	2.797869164	0.002749597	0.598586438	no	-	PREDICTED: urokinase plasminogen activator surface receptor-like [Sinocyclocheilus grahami]	-	-	-	-
Unigene0069240	1.333333333	11.66666667	0.258	0	0.0891	2.0444	1.1001	0.3917	0.1157	1.178733333	3.348776603	0.002768238	0.60084022	no	-	--	-	-	-	-
Unigene0018853	0.666666667	7	0.1104	0.1074	0	0.8285	0.8984	0.8044	0.0726	0.843766667	3.538802641	0.002784801	0.602630964	no	-	--	-	-	-	-
Unigene0016708	11.66666667	1.666666667	0.618	1.2033	1.2811	0.1105	0.2054	0.1609	1.034133333	0.158933333	-2.701928568	0.002798646	0.603353214	no	-	Kinase suppressor of Ras 1 [Larimichthys crocea]	-	-	-	-
Unigene0018687	5.666666667	23.66666667	0.4433	0.2158	1.2634	3.4666	2.7066	2.5242	0.640833333	2.899133333	2.177600588	0.002804784	0.603353214	no	-	PREDICTED: CD48 antigen-like isoform X2 [Cyprinus carpio]	-	-	-	-
Unigene0069223	9.333333333	1	1.0386	0.7584	0.628	0.1083	0	0.1577	0.808333333	0.088666667	-3.188486596	0.002840928	0.60609874	no	-	--	-	-	-	-
Unigene0052625	2.666666667	18.33333333	0.161	0.0784	0.4172	3.3241	0.4681	1.2469	0.218866667	1.6797	2.940079432	0.002841311	0.60609874	no	-	--	-	-	-	-
Unigene0060674	0.666666667	14.66666667	0	0	0.1842	2.5578	0	1.7005	0.0614	1.419433333	4.530932626	0.002847672	0.60609874	no	-	--	-	-	-	-
Unigene0016237	10.66666667	0	0	0.2302	2.3693	0	0	0	0.8665	0.001	-9.759055939	0.002859196	0.60609874	no	-	--	-	-	-	-
Unigene0042452	332	11.66666667	1.1222	107.1804	0.5816	3.3702	1.3052	0.1023	36.29473333	1.592566667	-4.510334545	0.002860489	0.60609874	no	IGHV3-23	immunoglobulin zeta heavy chain, partial [Danio rerio]	-	-	-	-
Unigene0053310	1	12.33333333	0.0926	0.1803	0	2.8969	0.2154	0.8438	0.090966667	1.3187	3.857634594	0.002867711	0.60609874	no	-	PREDICTED: protein IWS1 homolog isoform X6 [Takifugu rubripes]	-	-	-	-
Unigene0030529	9.666666667	31.33333333	0.7357	1.3429	0.5719	3.3371	3.7434	2.5137	0.8835	3.198066667	1.855897974	0.002907275	0.612360644	no	-	--	-	-	-	-
Unigene0013352	1	36.33333333	0.274	0	0	0	11.3653	0.1664	0.091333333	3.8439	5.395285507	0.002914233	0.612360644	no	-	--	-	-	-	-
Unigene0038147	32	102	0.9375	2.6241	2.0649	10.9246	3.1348	5.9261	1.8755	6.661833333	1.828643998	0.002934054	0.614743658	no	-	--	-	-	-	-
Unigene0053362	47.33333333	157	0.3263	0.3615	0.9329	3.6604	1.832	0.7278	0.540233333	2.0734	1.940343903	0.002959684	0.618326514	no	-	--	-	-	-	-
Unigene0052356	4.333333333	21.66666667	0.1079	0.4201	0.1677	0.54	2.3212	0.983	0.2319	1.2814	2.466146171	0.0029934	0.623573401	no	-	--	-	-	-	-
Unigene0029219	9.333333333	1	0.7895	0.4891	0.7439	0	0.167	0.0654	0.674166667	0.077466667	-3.121457729	0.003046255	0.631818544	no	GRM3	PREDICTED: metabotropic glutamate receptor 3-like, partial [Sinocyclocheilus rhinocerous]	ko04080//Neuroactive ligand-receptor interaction//Signaling molecules and interaction//Environmental Information Processing	GO:0044425//membrane part;GO:0031224//intrinsic component of membrane;GO:0016020//membrane	GO:0060089//molecular transducer activity	GO:0065007//biological regulation;GO:0009987//cellular process;GO:0007165//signal transduction;GO:0050896//response to stimulus;GO:0007154//cell communication;GO:0007166//cell surface receptor signaling pathway;GO:0050789//regulation of biological process;GO:0044699//single-organism process;GO:0044700//single organism signaling;GO:0044763//single-organism cellular process;GO:0051716//cellular res…
Unigene0031041	12.66666667	59.66666667	0.5058	0.2561	0	1.4684	1.0354	1.4195	0.253966667	1.307766667	2.364394097	0.003050411	0.631818544	no	-	PREDICTED: uncharacterized protein LOC107575365 isoform X3 [Sinocyclocheilus grahami]	-	-	-	-
Unigene0049879	11.33333333	0.333333333	2.3515	0	1.9241	0	0.1439	0	1.4252	0.047966667	-4.892988392	0.00306824	0.633700833	no	-	--	-	-	-	-
Unigene0017833	8.333333333	0	0.8216	0.3764	0	0	0	0	0.399333333	0.001	-8.641449692	0.003091976	0.636788923	no	-	--	-	-	-	-
Unigene0022455	40.66666667	1.333333333	0.0801	0	4.9836	0	0.0932	0.073	1.6879	0.0554	-4.929199647	0.003105978	0.637860585	no	IFI27L2	PREDICTED: interferon alpha-inducible protein 27-like protein 2A [Cyprinus carpio]	-	-	-	-
Unigene0055593	318	781.6666667	1.9745	2.0792	0.7205	6.5865	3.0873	3.5477	1.5914	4.407166667	1.469554952	0.003117234	0.638363777	no	Samd3	PREDICTED: LOW QUALITY PROTEIN: protein turtle homolog A-like [Cyprinus carpio]	-	-	-	-
Unigene0070940	0.666666667	7.666666667	0	0.107	0.1139	1.6501	0.6391	0.6008	0.073633333	0.963333333	3.709604169	0.003140015	0.641217555	no	-	--	-	-	-	-
Unigene0066415	1	11.33333333	0.091	0.1772	0	2.1638	1.3761	0.1659	0.0894	1.235266667	3.78840388	0.003166915	0.644894213	no	-	--	-	-	-	-
Unigene0016294	3	16.66666667	0.3539	0	0.1834	1.4762	0.8232	0.9674	0.1791	1.088933333	2.60407839	0.003196088	0.649011806	no	-	--	-	-	-	-
Unigene0016922	3.666666667	24.66666667	0.1655	0	0.0643	0.7249	0.1444	0.7541	0.0766	0.541133333	2.820567816	0.003211891	0.650398892	no	SLITRK6	PREDICTED: SLIT and NTRK-like protein 6 [Sinocyclocheilus rhinocerous]	-	-	-	-
Unigene0057385	8.333333333	0	1.6106	0	0.6492	0	0	0	0.753266667	0.001	-9.557016879	0.003236282	0.650668461	no	-	--	-	-	-	-
Unigene0065334	8.333333333	0	0.1731	0.0843	1.9736	0	0	0	0.743666667	0.001	-9.538512298	0.003238108	0.650668461	no	-	--	-	-	-	-
Unigene0016982	15.33333333	1.666666667	1.1997	0.3144	0.6217	0.1732	0.1073	0	0.711933333	0.0935	-2.928703881	0.003260792	0.650668461	no	IRF2	PREDICTED: interferon regulatory factor 1-like [Cyprinus carpio]	-	GO:0044424//intracellular part;GO:0043229//intracellular organelle;GO:0005623//cell;GO:0005622//intracellular;GO:0043226//organelle;GO:0043227//membrane-bounded organelle;GO:0043231//intracellular membrane-bounded organelle;GO:0044464//cell part	GO:0003676//nucleic acid binding;GO:0005488//binding;GO:0001067//regulatory region nucleic acid binding;GO:0097159//organic cyclic compound binding;GO:1901363//heterocyclic compound binding	GO:0097659//nucleic acid-templated transcription;GO:0034641//cellular nitrogen compound metabolic process;GO:0044238//primary metabolic process;GO:0090304//nucleic acid metabolic process;GO:0044237//cellular metabolic process;GO:0009059//macromolecule biosynthetic process;GO:0046483//heterocycle metabolic process;GO:0071704//organic substance metabolic process;GO:0016070//RNA metabolic process;GO…
Unigene0025373	12.33333333	133.3333333	0.5482	0.2809	0.2392	0.1083	0.5704	9.9891	0.3561	3.555933333	3.319873936	0.003263074	0.650668461	no	TNNT3	troponin T, fast skeletal muscle isoform 2 [Danio rerio]	-	-	-	GO:0044767//single-organism developmental process;GO:0044763//single-organism cellular process;GO:0090257//regulation of muscle system process;GO:0050789//regulation of biological process;GO:0048646//anatomical structure formation involved in morphogenesis;GO:0044057//regulation of system process;GO:0030029//actin filament-based process;GO:0061061//muscle structure development;GO:0070925//organel…
Unigene0063301	17.66666667	0	0	2.0276	0	0	0	0	0.675866667	0.001	-9.400594853	0.003274078	0.650668461	no	-	--	-	-	-	-
Unigene0051672	24	1.333333333	1.3591	0	1.0651	0	0	0.1208	0.808066667	0.040266667	-4.326816368	0.003275727	0.650668461	no	-	PREDICTED: NACHT, LRR and PYD domains-containing protein 3-like [Sinocyclocheilus anshuiensis]	-	-	-	-
Unigene0039224	6.666666667	0.333333333	1.1082	0.5394	0.5743	0.1387	0	0	0.740633333	0.046233333	-4.001754195	0.003276145	0.650668461	no	-	--	-	-	-	-
Unigene0059385	21.66666667	69	1.3845	1.0436	0.4629	5.8121	2.2336	2.4416	0.963666667	3.495766667	1.859002784	0.003285026	0.650668461	no	-	PREDICTED: uncharacterized protein LOC107653204 isoform X1 [Sinocyclocheilus anshuiensis]	-	-	-	-
Unigene0070335	1	11.33333333	0.1784	0	0.0924	1.5622	0.2074	1.4625	0.090266667	1.077366667	3.577172191	0.003304172	0.652677495	no	-	--	-	-	-	-
Unigene0070075	1.333333333	10.33333333	0.347	0	0.1199	1.7366	1.7486	0.6323	0.155633333	1.3725	3.140583156	0.003377878	0.665396884	no	-	--	-	-	-	-
Unigene0014116	11.33333333	37.66666667	0.1731	0.632	0.6728	1.6787	1.661	1.9321	0.492633333	1.757266667	1.834746984	0.003396054	0.665396884	no	-	--	-	-	-	-
Unigene0018237	9.666666667	1	1.1551	0.482	0.7697	0.2065	0	0.0752	0.802266667	0.0939	-3.094884793	0.0033961	0.665396884	no	-	PREDICTED: uncharacterized protein LOC107702002 [Sinocyclocheilus anshuiensis]	-	-	-	-
Unigene0007595	25.33333333	81.33333333	1.0594	0.7367	2.0915	8.2693	3.6964	2.2982	1.295866667	4.754633333	1.875416803	0.003410019	0.666323165	no	-	--	-	-	-	-
Unigene0064386	3	13.33333333	0.2968	0.2167	0.1538	1.2068	1.3805	0.7435	0.222433333	1.110266667	2.31946132	0.003428526	0.667322165	no	-	--	-	-	-	-
Unigene0027092	15	0.666666667	1.5716	0	1.086	0	0.1354	0	0.885866667	0.045133333	-4.294824334	0.003442696	0.667322165	no	-	--	-	-	-	-
Unigene0052299	0.666666667	13	0	0.1316	0	1.4372	1.7287	0	0.043866667	1.0553	4.588384292	0.003442747	0.667322165	no	-	--	-	-	-	-
Unigene0054356	1028.333333	375.6666667	8.0591	4.7236	3.0525	2.3153	2.3253	1.7702	5.2784	2.136933333	-1.304558783	0.003452066	0.667344126	no	Megf6	PREDICTED: multiple epidermal growth factor-like domains protein 6 [Sinocyclocheilus anshuiensis]	-	-	GO:0046872//metal ion binding;GO:0043169//cation binding;GO:0043167//ion binding;GO:0005488//binding	-
Unigene0039048	957.6666667	142.6666667	35.9469	2.2928	1.3133	1.7061	1.4577	2.9866	13.18433333	2.050133333	-2.685034977	0.003477355	0.670445183	no	Cpa2	Carboxypeptidase A2 (pancreatic) [Danio rerio]	-	-	GO:0046914//transition metal ion binding;GO:0043169//cation binding;GO:0005488//binding;GO:0008237//metallopeptidase activity;GO:0016787//hydrolase activity;GO:0008238//exopeptidase activity;GO:0070011//peptidase activity, acting on L-amino acid peptides;GO:0003824//catalytic activity;GO:0046872//metal ion binding;GO:0008233//peptidase activity;GO:0043167//ion binding;GO:0008235//metalloexopeptid…	GO:0043170//macromolecule metabolic process;GO:0051604//protein maturation;GO:0006508//proteolysis;GO:0071704//organic substance metabolic process;GO:0019538//protein metabolic process;GO:0008152//metabolic process;GO:0010467//gene expression;GO:0016485//protein processing;GO:0044238//primary metabolic process
Unigene0047512	53.33333333	128.3333333	1.3963	0.9647	1.2605	3.2689	3.117	3.078	1.207166667	3.154633333	1.385847454	0.003492625	0.671603137	no	-	--	-	-	-	-
Unigene0018304	9.333333333	35.33333333	0.1486	0.5209	0.154	1.153	0.6569	1.5167	0.2745	1.108866667	2.014207848	0.003507651	0.672002205	no	GABRA2	PREDICTED: gamma-aminobutyric acid receptor subunit alpha-2-like [Cyprinus carpio]	ko04080//Neuroactive ligand-receptor interaction//Signaling molecules and interaction//Environmental Information Processing	-	-	-
Unigene0000816	6.666666667	29.66666667	0	0.3088	0.3288	1.3097	0.7378	1.0404	0.212533333	1.0293	2.275902498	0.003519484	0.672002205	no	-	PREDICTED: LOW QUALITY PROTEIN: tetra-peptide repeat homeobox protein 1-like [Coturnix japonica]	-	-	-	-
Unigene0047763	25.66666667	86	1.3939	2.2444	0.4446	8.6541	2.8683	4.0545	1.360966667	5.1923	1.931742009	0.003522827	0.672002205	no	-	--	-	-	-	-
Unigene0026363	28.66666667	5	1.1191	0.5282	1.3005	0.3819	0.1972	0.0309	0.9826	0.203333333	-2.272757497	0.00353178	0.672002205	no	-	PREDICTED: leucine-rich repeat-containing protein 16A-like [Austrofundulus limnaeus]	-	-	-	-
Unigene0008222	30	98.33333333	0.3953	2.4534	1.5877	6.4302	3.6205	5.7627	1.4788	5.271133333	1.833686237	0.003555866	0.673726981	no	-	--	-	-	-	-
Unigene0039097	153.6666667	331	1.9413	1.6425	1.7606	3.9329	5.0935	3.6008	1.781466667	4.209066667	1.240434871	0.003559432	0.673726981	no	atoh8	protein atonal homolog 8 [Danio rerio]	-	-	GO:0005515//protein binding;GO:0005488//binding	GO:0044699//single-organism process;GO:0044767//single-organism developmental process;GO:0007275//multicellular organism development;GO:0048856//anatomical structure development;GO:0001654//eye development;GO:0043010//camera-type eye development;GO:0032502//developmental process;GO:0048513//animal organ development;GO:0048731//system development;GO:0003407//neural retina development;GO:0044707//s…
Unigene0039300	983.3333333	2764	9.5684	12.4548	9.1504	18.9052	12.2844	56.4898	10.3912	29.22646667	1.491913155	0.003608336	0.681204982	no	MYOC	PREDICTED: myocilin-like [Sinocyclocheilus anshuiensis]	-	-	-	-
Unigene0037855	3.333333333	93.66666667	0.3704	0	0.096	0	14.9169	0.1688	0.155466667	5.028566667	5.015470043	0.003627918	0.681776751	no	-	--	-	-	-	-
Unigene0023165	27	103.3333333	0.123	0.5189	1.0411	4.1297	2.3603	0.9339	0.561	2.474633333	2.141142101	0.003630174	0.681776751	no	TAGLN	PREDICTED: transgelin-like [Astyanax mexicanus]	-	GO:0005856//cytoskeleton;GO:0044464//cell part;GO:0043228//non-membrane-bounded organelle;GO:0043232//intracellular non-membrane-bounded organelle;GO:0005623//cell;GO:0005622//intracellular;GO:0043229//intracellular organelle;GO:0044424//intracellular part;GO:0043226//organelle	GO:0005488//binding;GO:0005515//protein binding;GO:0008092//cytoskeletal protein binding	GO:0071840//cellular component organization or biogenesis;GO:0009987//cellular process;GO:0007010//cytoskeleton organization;GO:0032502//developmental process;GO:0032989//cellular component morphogenesis;GO:0044699//single-organism process;GO:0016043//cellular component organization;GO:0044763//single-organism cellular process;GO:0048856//anatomical structure development;GO:0006996//organelle org…
Unigene0043649	13	1	1.7185	0.2952	1.9907	0.1265	0.2351	0	1.3348	0.120533333	-3.469119509	0.003643766	0.682199987	no	-	--	-	-	-	-
Unigene0022594	14.33333333	118.3333333	0.6509	0.6733	0.4217	0.5091	0.5678	12.3437	0.581966667	4.473533333	2.942406339	0.003651248	0.682199987	no	MYL1	fast skeletal myosin light chain 3 [Cyprinus carpio]	-	-	-	-
Unigene0056266	3.666666667	15.33333333	0.4414	0.2578	0.2745	2.2094	1.4375	0.9653	0.324566667	1.5374	2.243905827	0.003662986	0.682633626	no	-	transposase, partial [Siniperca chuatsi]	-	-	-	-
Unigene0026702	124.6666667	43	4.3173	2.856	3.2127	1.1774	0.9334	1.6642	3.462	1.258333333	-1.460091581	0.003730999	0.692881381	no	ripply3	PREDICTED: protein ripply3 [Sinocyclocheilus rhinocerous]	-	-	-	GO:1901362//organic cyclic compound biosynthetic process;GO:0044271//cellular nitrogen compound biosynthetic process;GO:0006139//nucleobase-containing compound metabolic process;GO:0090304//nucleic acid metabolic process;GO:0009058//biosynthetic process;GO:1901360//organic cyclic compound metabolic process;GO:0018130//heterocycle biosynthetic process;GO:0034641//cellular nitrogen compound metabol…
Unigene0011023	1	11	0.2415	0	0	0.3022	1.4044	1.1002	0.0805	0.9356	3.538831173	0.00373709	0.692881381	no	-	PREDICTED: sister chromatid cohesion protein PDS5 homolog B [Esox lucius]	-	-	-	-
Unigene0001334	48.66666667	201	1.3216	0.6433	1.9451	3.3074	14.0182	1.1319	1.303333333	6.1525	2.238966646	0.003773004	0.697605872	no	IGHV3-23	immunoglobulin HY heavy chain [Ctenopharyngodon idella]	-	-	-	-
Unigene0015877	8	50.66666667	0.0747	0	0.8518	2.2904	1.3034	2.4846	0.308833333	2.026133333	2.713828736	0.003783331	0.697605872	no	-	PREDICTED: transposon Tf2-1 polyprotein [Salmo salar]	ko00563//Glycosylphosphatidylinositol(GPI)-anchor biosynthesis//Glycan biosynthesis and metabolism//Metabolism	-	-	-
Unigene0067497	0.666666667	7.333333333	0.1215	0.1183	0	1.2162	1.413	0.4428	0.079933333	1.024	3.679274652	0.003791894	0.697605872	no	-	--	-	-	-	-
Unigene0008660	45.66666667	122.6666667	0.5026	0.5749	0.6511	2.1695	2.4403	0.7212	0.5762	1.777	1.624802116	0.003801992	0.697605872	no	Tap2	PREDICTED: antigen peptide transporter 2 [Latimeria chalumnae]	ko04145//Phagosome//Transport and catabolism//Cellular Processes;ko02010//ABC transporters//Membrane transport//Environmental Information Processing	-	-	-
Unigene0029613	17	67.66666667	0.7118	0.2887	0.5226	0.5196	3.7598	2.1618	0.5077	2.147066667	2.080318823	0.003810687	0.697605872	no	-	--	-	-	-	-
Unigene0067252	0.333333333	8	0	0.0966	0	0.993	0.1154	1.3557	0.0322	0.821366667	4.672893806	0.003831044	0.69956594	no	-	--	-	-	-	-
Unigene0014237	195.3333333	40	4.068	0.3127	1.9529	0.1741	0.635	0.5462	2.1112	0.451766667	-2.224413524	0.003890907	0.708372848	no	slc7a2	PREDICTED: cationic amino acid transporter 2-like [Sinocyclocheilus anshuiensis]	-	GO:0044425//membrane part;GO:0016020//membrane;GO:0031224//intrinsic component of membrane	GO:0022891//substrate-specific transmembrane transporter activity;GO:0005342//organic acid transmembrane transporter activity;GO:0022892//substrate-specific transporter activity;GO:0008509//anion transmembrane transporter activity;GO:0015075//ion transmembrane transporter activity;GO:0022857//transmembrane transporter activity;GO:0005215//transporter activity;GO:0046943//carboxylic acid transmemb…	GO:0006811//ion transport;GO:0044699//single-organism process;GO:0044765//single-organism transport;GO:0006810//transport;GO:0051234//establishment of localization;GO:1902578//single-organism localization;GO:0015849//organic acid transport;GO:0071702//organic substance transport;GO:0051179//localization;GO:0015711//organic anion transport;GO:0071705//nitrogen compound transport;GO:0006820//anion …
Unigene0067482	4.666666667	19	0.2993	0.437	0.3102	1.217	1.0442	2.1814	0.348833333	1.480866667	2.085831939	0.003905593	0.708372848	no	-	--	-	-	-	-
Unigene0067781	0.333333333	7	0	0	0.1107	0.8018	0.2484	1.265	0.0369	0.771733333	4.3864097	0.003908902	0.708372848	no	-	--	-	-	-	-
Unigene0000593	78.33333333	208	5.4583	5.3743	3.7287	23.6717	6.4925	12.9417	4.853766667	14.36863333	1.565746186	0.003926824	0.708372848	no	-	--	-	-	-	-
Unigene0052685	40.66666667	4.333333333	4.8273	0.254	0.2254	0.1088	0.1012	0.3566	1.7689	0.188866667	-3.227412485	0.00392813	0.708372848	no	sepm	fep15 selenoprotein precursor [Danio rerio]	-	-	-	-
Unigene0014580	6.666666667	24	0.4674	0.8342	0.2422	2.5343	1.8119	1.8453	0.5146	2.063833333	2.003803107	0.0039726	0.713631693	no	-	--	-	-	-	-
Unigene0020322	2.666666667	13.66666667	0.3861	0.2255	0	1.6425	0.8082	1.0553	0.203866667	1.168666667	2.519165684	0.00397698	0.713631693	no	-	--	-	-	-	-
Unigene0011541	6906.333333	13718	41.5247	102.8604	66.1213	159.0126	176.5052	127.7548	70.1688	154.4242	1.137997261	0.003989279	0.714071105	no	MR1	MHC class I alpha chain, partial [Megalobrama amblycephala]	ko04144//Endocytosis//Transport and catabolism//Cellular Processes;ko04514//Cell adhesion molecules (CAMs)//Signaling molecules and interaction//Environmental Information Processing;ko04145//Phagosome//Transport and catabolism//Cellular Processes	-	-	-
Unigene0051346	11	34.33333333	0.3904	1.077	0.6745	2.5242	2.1191	2.6088	0.713966667	2.417366667	1.759507693	0.004020654	0.716276411	no	-	--	-	-	-	-
Unigene0015485	3.333333333	16.66666667	0.1976	0.449	0	1.4015	1.6857	0.6603	0.215533333	1.249166667	2.534983066	0.00402136	0.716276411	no	-	--	-	-	-	-
Unigene0031503	71.66666667	184.6666667	7.0201	4.2715	5.9533	23.9569	8.6286	16.0634	5.7483	16.2163	1.496237422	0.004039749	0.71778817	no	-	PREDICTED: A-kinase anchor protein 9-like [Sinocyclocheilus anshuiensis]	-	-	-	-
Unigene0006795	5.666666667	23	0.8225	0.0801	0.5115	2.0584	1.7219	2.3232	0.471366667	2.0345	2.109752635	0.004061182	0.718097033	no	-	--	-	-	-	-
Unigene0013714	10.33333333	32.66666667	0.4746	0.6931	0.2952	2.6132	1.3249	1.2974	0.487633333	1.745166667	1.83949617	0.004061299	0.718097033	no	-	--	-	-	-	-
Unigene0070607	4	16.66666667	0.1952	0.1901	0.4047	1.5471	0.6812	1.3044	0.263333333	1.177566667	2.160846681	0.00409117	0.720069028	no	-	--	-	-	-	-
Unigene0049567	19	63	1.1536	0.9827	0.5978	2.8269	6.3731	1.2263	0.911366667	3.475433333	1.931089361	0.00409865	0.720069028	no	ZBBX	PREDICTED: zinc finger B-box domain-containing protein 1-like, partial [Cyprinus carpio]	-	-	-	-
Unigene0003213	11	32.66666667	0.5378	0.8508	0.8361	3.2804	2.1891	1.8987	0.741566667	2.456066667	1.72770142	0.00410225	0.720069028	no	-	--	-	-	-	-
Unigene0010081	12.33333333	41.33333333	0.2288	0.3464	0.3688	0.5089	1.3303	1.459	0.314666667	1.0994	1.804820121	0.004114515	0.720477417	no	-	pol-like protein [Danio rerio]	-	-	-	-
Unigene0023392	14	46	0.4815	0.8439	0.6988	3.9768	1.0641	2.3254	0.674733333	2.455433333	1.863588312	0.004146387	0.724308826	no	-	Nipped-B-like B, partial [Merops nubicus]	-	-	-	-
Unigene0039503	12.33333333	1.666666667	0.495	0.5852	0.2199	0	0.0823	0.0967	0.433366667	0.059666667	-2.860591103	0.004172598	0.726447945	no	WNT5A	PREDICTED: protein Wnt-5a-like [Sinocyclocheilus grahami]	ko04310//Wnt signaling pathway//Signal transduction//Environmental Information Processing;ko04916//Melanogenesis//Endocrine system//Organismal Systems;ko04340//Hedgehog signaling pathway//Signal transduction//Environmental Information Processing	-	-	-
Unigene0041742	5.666666667	0	0.8056	0.098	0.835	0	0	0	0.579533333	0.001	-9.178747834	0.004201275	0.726447945	no	-	PREDICTED: zinc finger BED domain-containing protein 1-like [Austrofundulus limnaeus]	-	-	-	-
Unigene0061281	1.666666667	11.33333333	0	0.1015	0.4323	0.9133	1.5765	1.3301	0.177933333	1.2733	2.83916366	0.004206483	0.726447945	no	-	--	-	-	-	-
Unigene0012766	0.333333333	6	0.1157	0	0	1.3025	0.8071	0.3161	0.038566667	0.808566667	4.389940366	0.004214967	0.726447945	no	-	--	-	-	-	-
Unigene0060360	0.666666667	13	0	0	0.1726	2.2927	0	1.29	0.057533333	1.194233333	4.375542874	0.004215652	0.726447945	no	-	--	-	-	-	-
Unigene0019859	8.333333333	0	0	0.6081	2.5897	0	0	0	1.065933333	0.001	-10.0579015	0.004218757	0.726447945	no	-	--	-	-	-	-
Unigene0007963	2.666666667	16.66666667	0.1655	0.3223	0.1716	0.8285	3.3691	0.5279	0.2198	1.575166667	2.841241195	0.004243435	0.727329739	no	-	--	-	-	-	-
Unigene0013692	1.333333333	10	0.0632	0	0.0655	0.2373	0.5881	0.2304	0.0429	0.351933333	3.036252612	0.004243944	0.727329739	no	NPNT	PREDICTED: nephronectin-like [Danio rerio]	-	-	-	-
Unigene0072667	0.666666667	7.333333333	0	0.1146	0.122	0.8837	0.5476	1.287	0.078866667	0.9061	3.522182706	0.004259013	0.728015298	notest	-	--	-	-	-	-
Unigene0048702	24	5	1.842	0.6301	1.1352	0.1869	0.4053	0.2268	1.202433333	0.273	-2.138984052	0.004271685	0.728015298	no	-	PREDICTED: uncharacterized protein LOC109053541 [Cyprinus carpio]	-	-	-	-
Unigene0039566	211.6666667	482.3333333	0.9981	1.0591	1.3137	4.4474	3.0342	1.3473	1.123633333	2.942966667	1.389099873	0.004287854	0.728015298	no	CACNA2D1	PREDICTED: voltage-dependent calcium channel subunit alpha-2/delta-1-like isoform X2 [Sinocyclocheilus rhinocerous]	ko04010//MAPK signaling pathway//Signal transduction//Environmental Information Processing;ko04261//Adrenergic signaling in cardiomyocytes//Circulatory system//Organismal Systems;ko04260//Cardiac muscle contraction//Circulatory system//Organismal Systems	-	-	-
Unigene0054902	85	22.66666667	4.5218	1.9653	3.8917	1.7682	0.7983	0.5886	3.4596	1.0517	-1.717882012	0.004288114	0.728015298	no	-	--	-	-	-	-
Unigene0026854	0	5	0	0	0	1.3417	0.2494	0.2931	0.001	0.628066667	9.294773893	0.004359964	0.738484252	no	-	--	-	-	-	-
Unigene0029165	10.33333333	0.666666667	0.842	0.149	1.4281	0.1916	0	0	0.806366667	0.063866667	-3.658300942	0.004405695	0.744490645	no	-	PREDICTED: sterile alpha motif domain-containing protein 3-like isoform X1 [Oreochromis niloticus]	-	-	-	-
Unigene0007449	343.6666667	101.3333333	3.2154	0.8506	1.1899	0.8263	0.4549	0.4489	1.751966667	0.5767	-1.603082399	0.004423447	0.745751996	no	TY3B-I	PREDICTED: contactin-associated protein-like 5 [Sinocyclocheilus grahami]	-	-	-	-
Unigene0057059	239.6666667	55.66666667	6.7847	1.4457	1.5815	0.2046	1.0299	1.1172	3.270633333	0.7839	-2.060828499	0.004459568	0.748552017	no	-	PREDICTED: uncharacterized protein LOC101482357 isoform X1 [Maylandia zebra]	-	-	-	-
Unigene0052358	4	22.33333333	0.0692	0.6059	0.1433	0.5192	3.1366	1.3861	0.2728	1.680633333	2.623089454	0.004460707	0.748552017	no	-	--	-	-	-	-
Unigene0049548	26.33333333	157	0.9762	0	0.2986	3.8046	4.1505	0.8457	0.424933333	2.9336	2.787363748	0.004500932	0.751727421	no	-	--	-	-	-	-
Unigene0011287	0	9.333333333	0	0	0	2.7115	0	0.0731	0.001	0.9282	9.858291887	0.004501581	0.751727421	no	-	--	-	-	-	-
Unigene0061619	30	4	1.4374	0.3149	1.5271	0	0.418	0.0655	1.093133333	0.161166667	-2.761844088	0.004519318	0.751727421	no	-	--	-	-	-	-
Unigene0044350	2.666666667	14	0.0857	0.3338	0.2665	1.5015	0.6978	1.64	0.228666667	1.279766667	2.484562814	0.004521107	0.751727421	no	-	--	-	-	-	-
Unigene0020204	19	73.66666667	2.0592	0.1383	1.9135	5.7751	8.5885	3.3642	1.370333333	5.909266667	2.108452234	0.004566438	0.757527176	no	-	--	-	-	-	-
Unigene0049545	24.33333333	5.333333333	0.2599	0.782	0.6857	0.0591	0.1649	0.1722	0.575866667	0.132066667	-2.124468436	0.004580319	0.758095064	no	-	--	-	-	-	-
Unigene0000729	9.333333333	46.66666667	0.5272	0.2717	0.0643	0.3104	1.587	2.4866	0.287733333	1.461333333	2.344481028	0.004621835	0.763223871	no	-	--	-	-	-	-
Unigene0016014	5	0	0.8861	0.3834	0.2041	0	0	0	0.4912	0.001	-8.94016675	0.00464324	0.765016072	no	-	--	-	-	-	-
Unigene0025765	0.666666667	6.666666667	0.1142	0.1111	0	0.9999	0.5311	0.9361	0.0751	0.822366667	3.452896976	0.004677226	0.768868082	no	-	--	-	-	-	-
Unigene0040981	3.333333333	13.66666667	0.3053	0.2972	0.1582	0.9551	1.0652	1.3213	0.253566667	1.113866667	2.135139538	0.004693647	0.769821865	no	-	--	-	-	-	-
Unigene0039709	16.33333333	0.666666667	3.857	0.0834	0.2665	0.2145	0	0	1.4023	0.0715	-4.293707972	0.004735149	0.774875549	no	-	--	-	-	-	-
Unigene0025468	4	15.33333333	0.1409	0.1372	0.292	0.8814	0.7646	0.7274	0.190033333	0.791133333	2.057668358	0.004755489	0.776451332	no	Pol	LINE-1 reverse transcriptase [Larimichthys crocea]	-	-	-	-
Unigene0002082	8	30.66666667	1.1873	0.8002	0.1893	4.3425	1.5933	3.2453	0.7256	3.060366667	2.076458154	0.004776985	0.777751479	no	-	--	-	-	-	-
Unigene0062251	12	2	1.0103	0.4918	1.122	0.0903	0.1679	0.1973	0.8747	0.151833333	-2.526299741	0.004784909	0.777751479	no	-	--	-	-	-	-
Unigene0055620	6	22.33333333	0.4362	0.546	0.1292	1.2476	2.1743	1.1924	0.370466667	1.5381	2.053733659	0.004834129	0.78399407	no	RNH1	PREDICTED: ribonuclease inhibitor-like, partial [Sinocyclocheilus rhinocerous]	-	-	-	-
Unigene0027237	68	152.6666667	2.5224	3.1463	2.3693	7.496	6.8757	5.6019	2.679333333	6.657866667	1.313185902	0.004854078	0.785472166	no	-	--	-	-	-	-
Unigene0064226	0.333333333	6.333333333	0.1077	0	0	0.2694	1.1269	0.7848	0.0359	0.727033333	4.339965762	0.00491362	0.791718488	no	-	--	-	-	-	-
Unigene0021971	11.66666667	2	0.7073	0.8416	1.2219	0.0983	0.2742	0.1432	0.9236	0.1719	-2.425698628	0.004914521	0.791718488	no	Cilp	PREDICTED: cartilage intermediate layer protein 1-like [Sinocyclocheilus grahami]	-	-	-	-
Unigene0018391	4.333333333	0	0.5021	0.7332	0.3903	0	0	0	0.541866667	0.001	-9.081794091	0.004974157	0.796063159	no	MT-CO3	cytochrome c oxidase subunit III, partial (mitochondrion) [Homo sapiens]	ko01100//Metabolic pathways//Global and Overview//Metabolism;ko04260//Cardiac muscle contraction//Circulatory system//Organismal Systems;ko00190//Oxidative phosphorylation//Energy metabolism//Metabolism	-	-	-
Unigene0000428	36.33333333	107.6666667	0.3379	1.6953	0.7812	2.8295	2.7508	3.4338	0.938133333	3.0047	1.679356067	0.004975618	0.796063159	no	-	--	-	-	-	-
Unigene0026896	15	1.333333333	0.076	0.6659	0.0985	0	0.0442	0.0346	0.280133333	0.026266667	-3.414808627	0.004981976	0.796063159	no	CHRNA7	PREDICTED: CHRNA7-FAM7A fusion protein-like [Cyprinus carpio]	ko04080//Neuroactive ligand-receptor interaction//Signaling molecules and interaction//Environmental Information Processing;ko04020//Calcium signaling pathway//Signal transduction//Environmental Information Processing	GO:0005887//integral component of plasma membrane;GO:0098805//whole membrane;GO:0016021//integral component of membrane;GO:0097060//synaptic membrane;GO:0005886//plasma membrane;GO:0044425//membrane part;GO:0044459//plasma membrane part;GO:0044456//synapse part;GO:0016020//membrane;GO:0031226//intrinsic component of plasma membrane;GO:0098589//membrane region;GO:0005623//cell;GO:0045202//synapse;…	GO:0015276//ligand-gated ion channel activity;GO:0005230//extracellular ligand-gated ion channel activity;GO:0015075//ion transmembrane transporter activity;GO:0022891//substrate-specific transmembrane transporter activity;GO:0005216//ion channel activity;GO:0005231//excitatory extracellular ligand-gated ion channel activity;GO:0022838//substrate-specific channel activity;GO:0004872//receptor act…	GO:0044699//single-organism process;GO:0006810//transport;GO:0051234//establishment of localization;GO:1902578//single-organism localization;GO:0044765//single-organism transport;GO:0051179//localization
Unigene0008216	5.333333333	22.66666667	0.1484	0.4334	0.6152	3.806	1.0354	1.0139	0.399	1.951766667	2.290319938	0.004985415	0.796063159	no	-	Receptor-type tyrosine-protein phosphatase O [Larimichthys crocea]	-	-	-	-
Unigene0030378	8.666666667	28.66666667	0.5029	0.6528	0.2896	2.7967	1.2347	1.3746	0.481766667	1.802	1.903192529	0.005006718	0.797707692	no	-	--	-	-	-	-
Unigene0052504	3.333333333	14.66666667	0.3989	0.3107	0.0827	2.0962	1.1134	0.7995	0.2641	1.336366667	2.339159696	0.005042219	0.801602321	no	-	--	-	-	-	-
Unigene0062314	0.333333333	5.666666667	0	0.1161	0	0.4478	0.6938	0.9783	0.0387	0.706633333	4.190556334	0.005065227	0.803497954	no	-	--	-	-	-	-
Unigene0055753	298.3333333	24	0.0295	0.8624	12.7463	0.4803	0.0687	0.565	4.546066667	0.371333333	-3.613832109	0.005102906	0.807707632	no	-	PREDICTED: guanylate-binding protein 1-like [Sinocyclocheilus rhinocerous]	-	-	-	-
Unigene0014486	0.333333333	6	0	0.0452	0	0.4643	0.1079	0.3381	0.015066667	0.303433333	4.331947403	0.005123716	0.808470683	no	-	PREDICTED: ubiquitin carboxyl-terminal hydrolase 43-like, partial [Sinocyclocheilus rhinocerous]	-	-	GO:0003824//catalytic activity;GO:0016787//hydrolase activity;GO:0008233//peptidase activity;GO:0070011//peptidase activity, acting on L-amino acid peptides	GO:0016485//protein processing;GO:0071704//organic substance metabolic process;GO:0019538//protein metabolic process;GO:0043170//macromolecule metabolic process;GO:0006508//proteolysis;GO:0051604//protein maturation;GO:0008152//metabolic process;GO:0010467//gene expression;GO:0044238//primary metabolic process
Unigene0021162	0	6.666666667	0	0	0	0	1.0225	1.2016	0.001	0.741366667	9.53404344	0.005130032	0.808470683	no	-	--	-	-	-	-
Unigene0053354	2	13.66666667	0	0.1364	0.2905	0.8767	0.4889	1.596	0.1423	0.9872	2.794406733	0.005157056	0.810966578	no	-	--	-	-	-	-
Unigene0060100	7	22.66666667	0.3622	0.2645	0.3285	0.9631	1.4217	0.99	0.3184	1.124933333	1.820927265	0.005178535	0.811709501	no	-	--	-	-	-	-
Unigene0023994	71.66666667	10	9.3678	0.573	0.61	0.3069	0.7416	0.5363	3.516933333	0.528266667	-2.734979703	0.005184174	0.811709501	no	ERP27	PREDICTED: endoplasmic reticulum resident protein 27-like [Sinocyclocheilus anshuiensis]	-	-	-	-
Unigene0005602	12.66666667	51	0.5534	0.6157	0.3278	0.3957	3.1263	2.7733	0.498966667	2.098433333	2.072297285	0.005205628	0.813312044	no	-	--	-	-	-	-
Unigene0019835	7.333333333	27	0.6588	1.6677	0.5463	3.9571	2.2987	5.0424	0.9576	3.766066667	1.975563481	0.005220122	0.813822674	no	-	--	-	-	-	-
Unigene0024160	0	4	0	0	0	0.0939	0.1745	0.2051	0.001	0.157833333	7.302258115	0.005247352	0.814563441	no	LRAT	PREDICTED: lecithin retinol acyltransferase-like [Sinocyclocheilus rhinocerous]	ko00830//Retinol metabolism//Metabolism of cofactors and vitamins//Metabolism	-	GO:0003824//catalytic activity;GO:0016747//transferase activity, transferring acyl groups other than amino-acyl groups;GO:0016746//transferase activity, transferring acyl groups;GO:0008374//O-acyltransferase activity;GO:0016740//transferase activity	GO:0044763//single-organism cellular process;GO:0044699//single-organism process;GO:0044255//cellular lipid metabolic process;GO:0044710//single-organism metabolic process;GO:0008152//metabolic process;GO:0006721//terpenoid metabolic process;GO:0044237//cellular metabolic process;GO:0001523//retinoid metabolic process;GO:0016101//diterpenoid metabolic process;GO:0006629//lipid metabolic process;G…
Unigene0069900	38.66666667	0.666666667	5.428	0	0	0	0.1088	0	1.809333333	0.036266667	-5.640670259	0.005257239	0.814563441	no	RBCS	--	-	-	-	-
Unigene0030146	708	258	5.4287	6.6261	9.6158	4.6257	2.0967	2.1317	7.223533333	2.951366667	-1.291321526	0.005258583	0.814563441	no	Ampd1	PREDICTED: AMP deaminase 1 isoform X2 [Danio rerio]	ko01100//Metabolic pathways//Global and Overview//Metabolism;ko01110//Biosynthesis of secondary metabolites//Global and Overview//Metabolism;ko01130//Biosynthesis of antibiotics//Global and Overview//Metabolism;ko00230//Purine metabolism//Nucleotide metabolism//Metabolism	-	GO:0016814//hydrolase activity, acting on carbon-nitrogen (but not peptide) bonds, in cyclic amidines;GO:0003824//catalytic activity;GO:0016810//hydrolase activity, acting on carbon-nitrogen (but not peptide) bonds;GO:0016787//hydrolase activity;GO:0019239//deaminase activity;GO:0047623//adenosine-phosphate deaminase activity	GO:0019637//organophosphate metabolic process;GO:1901566//organonitrogen compound biosynthetic process;GO:0034641//cellular nitrogen compound metabolic process;GO:1901135//carbohydrate derivative metabolic process;GO:1901576//organic substance biosynthetic process;GO:0006793//phosphorus metabolic process;GO:0019693//ribose phosphate metabolic process;GO:0019438//aromatic compound biosynthetic pro…
Unigene0025223	3	18.33333333	0.373	0.1211	0.6444	0.7779	1.88	4.1919	0.3795	2.283266667	2.588927574	0.005280188	0.815207859	no	-	--	-	-	-	-
Unigene0003118	215.3333333	452	1.5152	1.234	0.9734	2.3141	3.0153	3.0709	1.240866667	2.8001	1.174130247	0.005285233	0.815207859	no	asic1	PREDICTED: acid-sensing ion channel 1-like isoform X1 [Sinocyclocheilus rhinocerous]	-	GO:0016020//membrane;GO:0044425//membrane part;GO:0031224//intrinsic component of membrane	GO:0008324//cation transmembrane transporter activity;GO:0005215//transporter activity;GO:0022890//inorganic cation transmembrane transporter activity;GO:0022857//transmembrane transporter activity;GO:0015077//monovalent inorganic cation transmembrane transporter activity;GO:0005272//sodium channel activity;GO:0015075//ion transmembrane transporter activity;GO:0022892//substrate-specific transpor…	GO:0015672//monovalent inorganic cation transport;GO:0006811//ion transport;GO:0044699//single-organism process;GO:0006810//transport;GO:0051234//establishment of localization;GO:1902578//single-organism localization;GO:0044765//single-organism transport;GO:0051179//localization;GO:0006812//cation transport;GO:0006814//sodium ion transport;GO:0030001//metal ion transport
Unigene0037294	1.333333333	10.33333333	0.2198	0	0	0.7563	0.4473	0.6508	0.073266667	0.618133333	3.07668918	0.005298002	0.815442382	no	-	--	-	-	-	-
Unigene0005377	5.666666667	0.333333333	0.6159	0.4997	0.6384	0	0.1194	0	0.584666667	0.0398	-3.876774006	0.005354804	0.822438916	no	-	--	-	-	-	-
Unigene0047104	69.33333333	8	6.7006	0.412	0.2193	0.4854	0.2871	0.1928	2.443966667	0.321766667	-2.925137825	0.005408438	0.828920286	no	-	PREDICTED: zinc finger BED domain-containing protein 1-like isoform X1 [Maylandia zebra]	-	-	-	-
Unigene0054973	4.666666667	0	0.3062	0.5962	0.1587	0	0	0	0.3537	0.001	-8.466382409	0.005421437	0.829159666	no	-	--	-	-	-	-
Unigene0048064	72.66666667	182	7.0284	5.7577	5.9522	11.583	12.5605	24.3658	6.2461	16.16976667	1.372271288	0.005433431	0.829244552	no	-	--	-	-	-	-
Unigene0039372	25.66666667	314	3.234	0.2714	0.8091	0	22.5674	30.177	1.438166667	17.58146667	3.611752645	0.005457318	0.831140416	no	H2-Q9	MHC class I antigen [Ctenopharyngodon idella]	ko04144//Endocytosis//Transport and catabolism//Cellular Processes;ko04514//Cell adhesion molecules (CAMs)//Signaling molecules and interaction//Environmental Information Processing;ko04145//Phagosome//Transport and catabolism//Cellular Processes	-	-	-
Unigene0025694	3	16.33333333	0.7357	0.1194	0.2542	2.9151	0.8556	2.6813	0.369766667	2.150666667	2.540096857	0.005509082	0.837248854	no	-	--	-	-	-	-
Unigene0051678	48.66666667	146.3333333	0.7059	0.3436	0.8807	4.0403	0.8514	1.6199	0.6434	2.170533333	1.754261737	0.005525154	0.837248854	no	-	PREDICTED: uncharacterized protein LOC107677180 isoform X3 [Sinocyclocheilus anshuiensis]	-	-	-	-
Unigene0009558	329.6666667	705.3333333	2.5459	1.3432	1.2681	3.1792	4.6868	4.0512	1.719066667	3.9724	1.208385407	0.005532074	0.837248854	no	SAMD9L	PREDICTED: sterile alpha motif domain-containing protein 9-like [Cyprinus carpio]	-	-	-	-
Unigene0043740	15.66666667	47.66666667	0.3857	0.9075	0.1999	2.212	1.6448	1.2886	0.4977	1.715133333	1.784972443	0.005581988	0.843043043	no	VCAN	PREDICTED: versican core protein-like [Cyprinus carpio]	ko04514//Cell adhesion molecules (CAMs)//Signaling molecules and interaction//Environmental Information Processing	-	GO:0005488//binding	GO:0044699//single-organism process;GO:0001503//ossification;GO:0032502//developmental process;GO:0032501//multicellular organismal process;GO:0007275//multicellular organism development;GO:0044707//single-multicellular organism process;GO:0044767//single-organism developmental process;GO:0048856//anatomical structure development;GO:0036072//direct ossification;GO:0048731//system development
Unigene0021959	0.333333333	6.333333333	0	0	0.0527	0.1908	0.7095	0.1853	0.017566667	0.361866667	4.364545854	0.005651532	0.85125841	no	-	PREDICTED: glycogenin-1-like isoform X1 [Cyprinus carpio]	-	-	-	-
Unigene0048240	24	5	0.9133	2.3117	1.1359	0.6095	0.2124	0.2219	1.453633333	0.347933333	-2.062780601	0.005659869	0.85125841	no	-	--	-	-	-	-
Unigene0012136	10.33333333	30.66666667	0.2433	0.4061	0.4323	1.5222	1.0106	1.0134	0.360566667	1.182066667	1.712973468	0.005695817	0.854891363	no	-	--	-	-	-	-
Unigene0059746	200	407.6666667	0.5909	0.7241	0.7781	1.3961	1.8757	1.3871	0.6977	1.552966667	1.154348125	0.00572736	0.857849612	no	-	PREDICTED: uncharacterized protein si:dkey-264b2.3 [Danio rerio]	-	-	-	-
Unigene0021332	12	36.33333333	0.253	0.2709	0.3933	1.3611	0.5296	1.1063	0.305733333	0.999	1.708210824	0.005751113	0.859631314	no	Pol	pol-like protein [Tetraodon nigroviridis]	ko03410//Base excision repair//Replication and repair//Genetic Information Processing	-	-	-
Unigene0007730	0	4	0	0	0	0.7928	0.2948	0.5773	0.001	0.554966667	9.11625731	0.005777271	0.860936504	no	-	--	-	-	-	-
Unigene0046434	1.333333333	11.33333333	0.1984	0.1931	0	2.9789	0.4615	0.5423	0.1305	1.327566667	3.346662599	0.00579477	0.860936504	no	-	--	-	-	-	-
Unigene0007336	19.66666667	51.66666667	0.4263	0.441	0.718	1.7004	1.5495	1.311	0.528433333	1.5203	1.524562659	0.005795473	0.860936504	no	-	--	-	-	-	-
Unigene0022226	1.333333333	10.33333333	0	0.4865	0	1.8759	1.7436	0.7968	0.162166667	1.4721	3.182326468	0.005814294	0.861966128	no	-	--	-	-	-	-
Unigene0066433	23	4.666666667	0.5815	1.7498	1.315	0.1984	0.0615	0.4817	1.215433333	0.2472	-2.297720115	0.00583827	0.863754101	no	Mtco3	cytochrome c oxidase subunit III (mitochondrion) (mitochondrion) [Mus musculus musculus]	ko01100//Metabolic pathways//Global and Overview//Metabolism;ko04260//Cardiac muscle contraction//Circulatory system//Organismal Systems;ko00190//Oxidative phosphorylation//Energy metabolism//Metabolism	GO:0043229//intracellular organelle;GO:0044424//intracellular part;GO:0043231//intracellular membrane-bounded organelle;GO:0043227//membrane-bounded organelle;GO:0044464//cell part;GO:0005623//cell;GO:0044425//membrane part;GO:0043226//organelle;GO:0031224//intrinsic component of membrane;GO:0016020//membrane;GO:0005622//intracellular	GO:0003824//catalytic activity;GO:0016491//oxidoreductase activity	GO:0022900//electron transport chain;GO:0008152//metabolic process;GO:0044710//single-organism metabolic process;GO:0044237//cellular metabolic process;GO:0015992//proton transport;GO:0015672//monovalent inorganic cation transport;GO:0009987//cellular process;GO:0006812//cation transport;GO:0044699//single-organism process;GO:0051234//establishment of localization;GO:0044763//single-organism cell…
Unigene0011227	1.666666667	11	0.3162	0	0.0819	1.286	0.5517	1.0085	0.1327	0.948733333	2.837834266	0.005962538	0.880342575	no	-	--	-	-	-	-
Unigene0054661	90.66666667	17.33333333	3.6386	0.5542	2.6168	0.6194	0.8061	0.0902	2.269866667	0.505233333	-2.167585824	0.006094847	0.892914894	no	THAP6	PREDICTED: THAP domain-containing protein 6-like [Sinocyclocheilus rhinocerous]	-	-	-	-
Unigene0015124	8	29.66666667	0.2216	0.1079	0.3446	1.7333	0.4189	0.6563	0.2247	0.936166667	2.058765273	0.00610183	0.892914894	no	Mixl1	PREDICTED: homeobox protein Mix.2-like [Sinocyclocheilus anshuiensis]	-	GO:0043227//membrane-bounded organelle;GO:0005623//cell;GO:0043226//organelle;GO:0044424//intracellular part;GO:0043229//intracellular organelle;GO:0043231//intracellular membrane-bounded organelle;GO:0044464//cell part;GO:0005622//intracellular	GO:0003676//nucleic acid binding;GO:0005488//binding;GO:0003677//DNA binding;GO:0001071//nucleic acid binding transcription factor activity;GO:0097159//organic cyclic compound binding;GO:1901363//heterocyclic compound binding	GO:0048731//system development;GO:0034645//cellular macromolecule biosynthetic process;GO:0043170//macromolecule metabolic process;GO:1901576//organic substance biosynthetic process;GO:0044238//primary metabolic process;GO:0044699//single-organism process;GO:0009888//tissue development;GO:0010467//gene expression;GO:0034641//cellular nitrogen compound metabolic process;GO:0046483//heterocycle met…
Unigene0050266	7	0	0	0.4312	0.1836	0	0	0	0.204933333	0.001	-7.679010854	0.006104482	0.892914894	no	Farp1	PREDICTED: FERM, RhoGEF and pleckstrin domain-containing protein 1-like [Sinocyclocheilus grahami]	-	GO:0044425//membrane part;GO:0043229//intracellular organelle;GO:0019898//extrinsic component of membrane;GO:0042995//cell projection;GO:0016020//membrane;GO:0043228//non-membrane-bounded organelle;GO:0071944//cell periphery;GO:0005623//cell;GO:0019897//extrinsic component of plasma membrane;GO:0005622//intracellular;GO:0044424//intracellular part;GO:0044464//cell part;GO:0005737//cytoplasm;GO:00…	GO:0051020//GTPase binding;GO:0017048//Rho GTPase binding;GO:0017016//Ras GTPase binding;GO:0098772//molecular function regulator;GO:0031267//small GTPase binding;GO:0019899//enzyme binding;GO:0005515//protein binding;GO:0005085//guanyl-nucleotide exchange factor activity;GO:0005488//binding;GO:0005088//Ras guanyl-nucleotide exchange factor activity;GO:0005089//Rho guanyl-nucleotide exchange fact…	GO:0044699//single-organism process;GO:0065007//biological regulation;GO:0048699//generation of neurons;GO:0048869//cellular developmental process;GO:0031399//regulation of protein modification process;GO:0035304//regulation of protein dephosphorylation;GO:0043087//regulation of GTPase activity;GO:0016358//dendrite development;GO:0030030//cell projection organization;GO:0016043//cellular componen…
Unigene0010488	5.666666667	20.33333333	0.0911	0.1183	0.3148	0.7601	0.5652	0.6918	0.174733333	0.672366667	1.94409335	0.006111273	0.892914894	no	NTNG2	PREDICTED: netrin-G2-like isoform X1 [Sinocyclocheilus anshuiensis]	ko04514//Cell adhesion molecules (CAMs)//Signaling molecules and interaction//Environmental Information Processing	-	-	-
Unigene0043446	2.333333333	12	0.1772	0.2587	0.1836	0.665	1.3393	1.372	0.2065	1.125433333	2.446266912	0.006123799	0.892914894	no	-	--	-	-	-	-
Unigene0022877	0.666666667	9.666666667	0.1249	0	0.1295	3.7517	0.2906	0.3415	0.0848	1.461266667	4.107011405	0.006131963	0.892914894	no	-	--	-	-	-	-
Unigene0040866	1	10.66666667	0	0.2677	0	0.9174	0.3198	1.7535	0.089233333	0.9969	3.481794155	0.006133909	0.892914894	no	-	PREDICTED: signal transducer and activator of transcription 1-like [Sinocyclocheilus grahami]	-	-	-	-
Unigene0057268	2	10.33333333	0.1077	0.3144	0.2232	1.6166	1.2522	0.8829	0.2151	1.250566667	2.539502539	0.006179234	0.89313207	no	-	PREDICTED: uncharacterized protein K02A2.6-like [Oreochromis niloticus]	-	-	-	-
Unigene0051883	3.666666667	19.66666667	0.2056	0.2002	0.0426	0.1544	1.3871	1.0117	0.149466667	0.851066667	2.50944837	0.006196326	0.89313207	no	-	--	-	-	-	-
Unigene0051452	1052.666667	2063.333333	9.7505	11.9474	6.8628	14.7202	24.3471	21.363	9.520233333	20.14343333	1.081240765	0.006197668	0.89313207	no	AHNAK	PREDICTED: neuroblast differentiation-associated protein AHNAK isoform X1 [Sinocyclocheilus anshuiensis]	-	-	-	-
Unigene0030367	156.6666667	381.6666667	2.604	1.9834	1.762	4.592	2.9815	8.3962	2.116466667	5.323233333	1.330645038	0.006208554	0.89313207	no	Lox	protein-lysine 6-oxidase precursor [Danio rerio]	-	-	GO:0043167//ion binding;GO:0046872//metal ion binding;GO:0016638//oxidoreductase activity, acting on the CH-NH2 group of donors;GO:0003824//catalytic activity;GO:0016491//oxidoreductase activity;GO:0005488//binding;GO:0043169//cation binding;GO:0046914//transition metal ion binding	GO:0032502//developmental process;GO:0032501//multicellular organismal process;GO:0007275//multicellular organism development;GO:0048856//anatomical structure development;GO:0048513//animal organ development;GO:0007399//nervous system development;GO:0044707//single-multicellular organism process;GO:0044699//single-organism process;GO:0048731//system development;GO:0008152//metabolic process;GO:00…
Unigene0043071	9.666666667	31	0.3749	0.3982	0.212	0.6398	1.11	1.5529	0.328366667	1.1009	1.74530384	0.006212888	0.89313207	no	Btn2a2	PREDICTED: tripartite motif-containing protein 35-like [Sinocyclocheilus grahami]	-	-	-	-
Unigene0040029	196	444.6666667	2.0737	1.2989	1.1142	2.6615	3.1211	4.8833	1.4956	3.5553	1.249246925	0.006213045	0.89313207	no	Bmp7	PREDICTED: bone morphogenetic protein 7-like isoform X2 [Cyprinus carpio]	ko04350//TGF-beta signaling pathway//Signal transduction//Environmental Information Processing	-	GO:0005102//receptor binding;GO:0005488//binding;GO:0005515//protein binding	-
Unigene0003660	12.66666667	36.66666667	1.3899	0.9021	0.6403	2.3189	3.7718	3.0956	0.977433333	3.0621	1.647451188	0.006221642	0.89313207	no	-	--	-	-	-	-
Unigene0064889	29	4	3.0443	0.1694	0.586	0.0544	0.2023	0.2774	1.266566667	0.178033333	-2.830703728	0.006246365	0.894398627	no	-	--	-	-	-	-
Unigene0051455	303.6666667	614.6666667	7.1085	12.3899	6.5063	22.9185	19.5353	16.166	8.668233333	19.53993333	1.172615651	0.006261417	0.894398627	no	-	--	-	-	-	-
Unigene0056616	312	983.3333333	2.8167	5.4252	1.1342	26.0407	6.3397	3.3049	3.125366667	11.8951	1.928270039	0.006281052	0.894398627	no	Timp2	Tissue inhibitor of metalloproteinase 2b [Danio rerio]	-	-	-	-
Unigene0046300	0.333333333	20	0.0654	0	0	0	0	3.575	0.0218	1.191666667	5.772508796	0.00628514	0.894398627	no	-	--	-	-	-	-
Unigene0003962	41.33333333	111.6666667	0.5983	0.7169	1.5741	2.1595	2.4353	3.5432	0.9631	2.712666667	1.493954272	0.006307797	0.894398627	no	-	PREDICTED: proline and serine-rich protein 1-like [Danio rerio]	-	-	-	-
Unigene0072119	0.666666667	7	0.1167	0	0.1209	1.4599	1.0856	0.3189	0.0792	0.9548	3.591626231	0.006309156	0.894398627	no	-	--	-	-	-	-
Unigene0050864	49.66666667	120.3333333	1.1549	1.8739	0.7714	4.6242	3.1937	2.5722	1.266733333	3.463366667	1.451062287	0.006316828	0.894398627	no	-	--	-	-	-	-
Unigene0031427	4.333333333	0	0.9375	0.2282	0.3644	0	0	0	0.510033333	0.001	-8.994447728	0.006381633	0.901813052	no	-	--	-	-	-	-
Unigene0073242	41	113	3.6895	3.0787	9.6967	23.7424	11.9535	14.0467	5.4883	16.58086667	1.595088168	0.006425233	0.904534088	notest	-	--	-	-	-	-
Unigene0023455	40	10.66666667	1.6454	1.6018	3.1907	0.3321	0.2469	1.1123	2.145966667	0.563766667	-1.928457582	0.006436617	0.904534088	no	-	--	-	-	-	-
Unigene0036511	88.66666667	210	1.0187	1.2722	0.4266	2.7553	2.0464	2.2969	0.905833333	2.3662	1.385254486	0.00643832	0.904534088	no	Lrrc15	PREDICTED: carboxypeptidase N subunit 2-like isoform X1 [Sinocyclocheilus grahami]	-	-	-	-
Unigene0046068	0.333333333	8.666666667	0	0.0536	0	0	0.8966	0.602	0.017866667	0.499533333	4.805238546	0.006451996	0.904702058	no	-	--	-	-	-	-
Unigene0029326	22.33333333	72.66666667	0.8026	3.0138	3.9216	17.9331	6.134	4.9099	2.579333333	9.659	1.904875606	0.006545532	0.913643948	no	-	--	-	-	-	-
Unigene0067369	8.666666667	33.66666667	1.0832	0.1055	0.2245	2.3042	1.6378	2.0233	0.471066667	1.988433333	2.07762904	0.006550777	0.913643948	no	-	--	-	-	-	-
Unigene0001774	101	319.3333333	2.1808	4.1439	1.5795	4.8001	21.116	2.8967	2.634733333	9.604266667	1.86601851	0.006553575	0.913643948	no	MFAP4	PREDICTED: microfibril-associated glycoprotein 4-like isoform X1 [Sinocyclocheilus anshuiensis]	-	-	-	-
Unigene0000600	6.333333333	23	0.5133	0.7995	0.6384	4.3673	1.0745	2.4319	0.6504	2.624566667	2.012680081	0.006607209	0.919353177	no	-	--	-	-	-	-
Unigene0069905	0	3.666666667	0	0	0	0.6404	0.4464	0.4663	0.001	0.5177	9.015972508	0.006650745	0.923069661	no	-	--	-	-	-	-
Unigene0006581	754.6666667	1637.333333	14.4167	38.9308	20.1489	90.2789	61.3028	32.2149	24.4988	61.26553333	1.322364588	0.006659385	0.923069661	no	-	--	-	-	-	-
Unigene0047589	1.333333333	9	0	0.1398	0.1488	1.0777	0.5009	0.5886	0.0962	0.7224	2.908689094	0.006682507	0.924506987	no	epb4.1l4	PREDICTED: band 4.1-like protein 4 isoform X2 [Sinocyclocheilus anshuiensis]	-	GO:0005622//intracellular;GO:0044464//cell part;GO:0044424//intracellular part;GO:0005623//cell	GO:0005488//binding;GO:0005515//protein binding	-
Unigene0030476	22.33333333	6	0.9044	0.566	0.703	0.1617	0.1878	0.2649	0.724466667	0.2048	-1.822703596	0.006704952	0.925845357	no	-	gag-pol fusion polyprotein [Takifugu rubripes]	-	-	-	-
Unigene0017334	11	0.666666667	0.5483	0.2089	0.0247	0	0.0555	0	0.260633333	0.0185	-3.816424431	0.006778276	0.934190771	no	Gucy1b2	PREDICTED: guanylate cyclase soluble subunit beta-2-like [Sinocyclocheilus grahami]	ko04270//Vascular smooth muscle contraction//Circulatory system//Organismal Systems;ko00230//Purine metabolism//Nucleotide metabolism//Metabolism;ko04540//Gap junction//Cellular commiunity//Cellular Processes	-	-	-
Unigene0069083	17	48	0.2974	0.3281	0.3904	1.3643	0.5533	1.1741	0.338633333	1.030566667	1.605641938	0.00680796	0.934847316	no	-	PREDICTED: trichohyalin-like isoform X2 [Sinocyclocheilus anshuiensis]	-	-	-	-
Unigene0021681	3	13.33333333	0.1698	0.2204	0.1173	1.0622	0.3291	1.0313	0.169166667	0.807533333	2.255076491	0.006831194	0.934847316	no	-	--	-	-	-	-
Unigene0017645	14	41.66666667	0.3642	0.7599	1.0786	3.6461	1.5734	2.0386	0.734233333	2.419366667	1.720318916	0.006833354	0.934847316	no	-	--	-	-	-	-
Unigene0007912	7	23	0.5758	0.1682	0.4774	1.2968	1.741	1.3115	0.407133333	1.449766667	1.832247474	0.006851868	0.934847316	no	-	--	-	-	-	-
Unigene0066335	0.666666667	6.666666667	0.1273	0.124	0	1.5933	0.5924	0.6961	0.083766667	0.9606	3.519487638	0.00685885	0.934847316	no	-	--	-	-	-	-
Unigene0032261	59.33333333	154.3333333	0.8822	1.6244	0.8945	1.9438	2.6543	4.5956	1.1337	3.064566667	1.434644165	0.006862966	0.934847316	no	-	--	-	-	-	-
Unigene0014082	11.66666667	42.66666667	0.3184	0.2536	0.45	0.3622	1.6159	1.8461	0.340666667	1.274733333	1.90376278	0.006873308	0.934847316	no	MPDZ	PREDICTED: multiple PDZ domain protein-like [Sinocyclocheilus rhinocerous]	-	-	-	-
Unigene0068412	0	4.666666667	0	0	0	1.6088	0.4486	0.1171	0.001	0.724833333	9.501505493	0.006916731	0.937504398	no	-	--	-	-	-	-
Unigene0000336	7.333333333	24	0.2449	0.2781	0.3807	0.8681	0.8543	1.3758	0.301233333	1.032733333	1.77751445	0.006918708	0.937504398	no	-	--	-	-	-	-
Unigene0007911	181.3333333	415	8.3687	9.7213	7.7869	41.4106	12.83	13.7337	8.625633333	22.6581	1.393324594	0.006970681	0.940025217	no	-	--	-	-	-	-
Unigene0041580	4.333333333	17.33333333	0.148	0.4321	0.3834	2.4068	0.6883	1.2133	0.321166667	1.436133333	2.160795627	0.006974935	0.940025217	no	-	--	-	-	-	-
Unigene0065951	4.666666667	22.33333333	0	0.6741	0.1196	2.0938	0.9395	1.2618	0.264566667	1.4317	2.43602601	0.006983649	0.940025217	no	-	--	-	-	-	-
Unigene0031896	18.66666667	4.666666667	0.9275	1.0033	0.9613	0.2579	0.1199	0.3756	0.964033333	0.251133333	-1.940629499	0.007010292	0.940025217	no	-	PREDICTED: uncharacterized protein LOC109056028 isoform X1 [Cyprinus carpio]	-	-	-	-
Unigene0015878	0	4.333333333	0	0	0	1.2447	0.1446	0.4532	0.001	0.614166667	9.262486403	0.007013426	0.940025217	no	-	--	-	-	-	-
Unigene0066384	1	8.666666667	0.2534	0.1234	0	1.5857	0.4422	1.501	0.1256	1.1763	3.227347678	0.007015114	0.940025217	no	-	--	-	-	-	-
Unigene0047075	10	34.66666667	0.2153	0.5989	0.0956	1.9245	0.7155	0.9529	0.303266667	1.197633333	1.981527442	0.007082605	0.947317997	no	-	--	-	-	-	-
Unigene0056486	4.666666667	24.33333333	0.1859	1.0857	0	3.0233	1.0808	3.1329	0.423866667	2.412333333	2.50874685	0.00712143	0.950213071	no	-	--	-	-	-	-
Unigene0061493	3.333333333	15.66666667	0.091	0.6202	0.1887	2.961	1.4819	0.5805	0.299966667	1.674466667	2.480827559	0.007130465	0.950213071	no	-	PREDICTED: uncharacterized protein LOC107705643 [Sinocyclocheilus rhinocerous]	-	-	-	GO:0050789//regulation of biological process;GO:0044700//single organism signaling;GO:0023052//signaling;GO:0006950//response to stress;GO:0006955//immune response;GO:0002376//immune system process;GO:0051716//cellular response to stimulus;GO:0007154//cell communication;GO:0031349//positive regulation of defense response;GO:0048584//positive regulation of response to stimulus;GO:0009987//cellular…
Unigene0056770	36	88.33333333	2.0243	2.7372	1.2822	7.6694	4.0548	4.816	2.014566667	5.5134	1.452472725	0.007161248	0.952240021	no	-	--	-	-	-	-
Unigene0020581	14.33333333	68.33333333	0.6428	0	2.1988	8.2047	3.2897	3.4557	0.9472	4.983366667	2.395379743	0.007176985	0.952240021	no	-	--	-	-	-	-
Unigene0054689	218.6666667	495.3333333	1.0234	0.548	0.841	1.4453	1.4921	2.7275	0.804133333	1.8883	1.231581349	0.007190153	0.952240021	no	TECTA	PREDICTED: apolipophorins-like [Cyprinus carpio]	-	-	-	-
Unigene0002095	6.333333333	29.33333333	0.3485	1.1874	0.0903	6.3228	1.7225	1.0319	0.542066667	3.025733333	2.480742645	0.007207353	0.952240021	no	-	--	-	-	-	-
Unigene0016238	7	0	0	0.4465	2.0202	0	0	0	0.822233333	0.001	-9.68340405	0.007211352	0.952240021	no	-	--	-	-	-	-
Unigene0045210	451	889	5.6604	3.2353	3.4917	10.6927	7.4964	8.5263	4.129133333	8.905133333	1.108798207	0.007230163	0.952960042	no	bmp2	PREDICTED: bone morphogenetic protein 2-like [Sinocyclocheilus rhinocerous]	ko04060//Cytokine-cytokine receptor interaction//Signaling molecules and interaction//Environmental Information Processing;ko04350//TGF-beta signaling pathway//Signal transduction//Environmental Information Processing;ko04340//Hedgehog signaling pathway//Signal transduction//Environmental Information Processing	-	-	-
Unigene0054053	0	3.666666667	0	0	0	0.3112	0.5785	0.5665	0.001	0.4854	8.923030298	0.007243096	0.952960042	no	-	--	-	-	-	-
Unigene0011272	1348	2690	22.8742	14.8181	32.9306	75.036	51.0773	32.3799	23.54096667	52.83106667	1.166212975	0.007260234	0.953484482	no	-	--	-	-	-	-
Unigene0005575	22	55	0.5797	0.8318	0.6009	2.2144	1.4905	1.8071	0.6708	1.837333333	1.453658793	0.007295339	0.956362262	no	-	Sterile alpha motif domain-containing protein 3 [Larimichthys crocea]	-	-	-	-
Unigene0064456	2.666666667	12.33333333	0.0772	0.2255	0.3201	0.773	1.0777	1.196	0.2076	1.015566667	2.290406599	0.007354281	0.962318113	no	-	PREDICTED: pituitary adenylate cyclase-activating polypeptide type I receptor-like [Sinocyclocheilus rhinocerous]	ko04080//Neuroactive ligand-receptor interaction//Signaling molecules and interaction//Environmental Information Processing	GO:0031224//intrinsic component of membrane;GO:0044425//membrane part;GO:0016020//membrane	GO:0004888//transmembrane signaling receptor activity;GO:0004871//signal transducer activity;GO:0038023//signaling receptor activity;GO:0004930//G-protein coupled receptor activity;GO:0099600//transmembrane receptor activity;GO:0004872//receptor activity;GO:0060089//molecular transducer activity	GO:0050789//regulation of biological process;GO:0044699//single-organism process;GO:0044700//single organism signaling;GO:0050794//regulation of cellular process;GO:0065007//biological regulation;GO:0051716//cellular response to stimulus;GO:0007186//G-protein coupled receptor signaling pathway;GO:0007165//signal transduction;GO:0050896//response to stimulus;GO:0007154//cell communication;GO:00447…
Unigene0047270	38.66666667	103.3333333	1.4177	4.6425	1.3358	7.4989	7.4947	6.8695	2.465333333	7.2877	1.563680847	0.007367321	0.962318113	no	-	PREDICTED: A-kinase anchor protein 9-like [Sinocyclocheilus anshuiensis]	-	-	-	-
Unigene0047949	6	0.333333333	0.2559	0.2491	0.6631	0	0.0744	0	0.389366667	0.0248	-3.972717356	0.007409639	0.965663067	no	-	--	-	-	-	-
Unigene0008601	51.33333333	115.6666667	1.6748	2.5405	1.7763	6.5306	4.3034	4.1875	1.9972	5.007166667	1.326015665	0.00741957	0.965663067	no	-	--	-	-	-	-
Unigene0029161	70.33333333	19.33333333	1.6367	0.3477	1.1875	0.242	0.1557	0.4881	1.0573	0.295266667	-1.840294386	0.007455497	0.968599938	no	-	PREDICTED: uncharacterized protein LOC109084903 [Cyprinus carpio]	-	-	-	-
Unigene0068287	0	4.333333333	0	0	0	0.152	0.4239	0.9963	0.001	0.524066667	9.033606539	0.007476504	0.969591544	no	-	--	-	-	-	-
Unigene0014293	0.333333333	6	0	0.0789	0	1.1148	0.471	0.1476	0.0263	0.5778	4.457435499	0.007502063	0.970398872	no	-	--	-	-	-	-
Unigene0019776	21.66666667	56.66666667	1.1374	0.7382	1.6841	4.6085	2.6457	2.9609	1.186566667	3.405033333	1.520875762	0.0075185	0.970398872	no	-	--	-	-	-	-
Unigene0064025	23.33333333	5.333333333	1.528	2.621	0.905	0.2731	0.5924	0.3978	1.684666667	0.4211	-2.000228383	0.007522887	0.970398872	no	-	--	-	-	-	-
Unigene0063270	1	9.333333333	0.2127	0	0.1102	2.5288	0.7422	0.2907	0.107633333	1.187233333	3.463406658	0.007543005	0.971265788	no	-	--	-	-	-	-
Unigene0030680	11.66666667	1.333333333	1.1405	2.4674	0.7881	0.3171	0.2948	0	1.465333333	0.203966667	-2.844823582	0.007583702	0.974131151	no	-	--	-	-	-	-
Unigene0024834	13.33333333	2.333333333	0.6594	1.1769	0.3417	0.0688	0.1278	0.2003	0.726	0.1323	-2.456156487	0.007592133	0.974131151	no	MRPL53	PREDICTED: 39S ribosomal protein L53, mitochondrial-like [Sinocyclocheilus anshuiensis]	-	-	-	-
Unigene0042838	0	3.666666667	0	0	0	0.2651	0.0821	0.0965	0.001	0.1479	7.208478242	0.007605953	0.974180122	no	-	--	-	-	-	-
Unigene0071410	6.333333333	21	0.3402	0.2839	0.3022	1.1554	0.6782	1.4169	0.308766667	1.0835	1.811110235	0.007627233	0.975182757	no	-	--	-	-	-	-
Unigene0031333	6.666666667	0.333333333	0.3324	0.4315	1.4932	0.1387	0	0	0.752366667	0.046233333	-4.024430645	0.007649195	0.976268881	no	-	--	-	-	-	-
Unigene0071821	13.33333333	44.66666667	0.5318	0.0518	0.4961	1.6304	1.1752	1.1387	0.3599	1.314766667	1.869138778	0.00768918	0.979647531	no	-	--	-	-	-	-
Unigene0001518	13504	23595.66667	29.0016	48.4123	42.2822	83.0817	70.3905	74.6444	39.8987	76.03886667	0.930395289	0.007724177	0.98116259	no	gag-pol	PREDICTED: protein NYNRIN-like isoform X2 [Oreochromis niloticus]	-	-	-	-
Unigene0024929	32	81.66666667	2.8536	2.0836	3.6971	5.4676	7.6749	9.9126	2.8781	7.685033333	1.416934798	0.007728141	0.98116259	no	-	--	-	-	-	-
Unigene0028053	5.666666667	0.333333333	0.2383	0.174	0.0926	0	0.0346	0	0.1683	0.011533333	-3.867153734	0.007756275	0.982924906	no	CLDN6	PREDICTED: claudin-9-like [Sinocyclocheilus anshuiensis]	ko04530//Tight junction//Cellular commiunity//Cellular Processes;ko04514//Cell adhesion molecules (CAMs)//Signaling molecules and interaction//Environmental Information Processing	-	-	-
Unigene0021762	26	64.33333333	1.1989	2.0691	0.9602	4.5005	3.7395	3.3764	1.4094	3.872133333	1.458047512	0.007769139	0.982924906	no	-	--	-	-	-	-
Unigene0033369	3.333333333	14.33333333	0.1488	0.2173	0.3855	0.8378	1.817	0.8812	0.250533333	1.178666667	2.234081303	0.007804832	0.984535677	no	-	PREDICTED: protein unc-13 homolog C-like [Cyprinus carpio]	-	-	-	-
Unigene0009199	10	34.66666667	0.1053	1.0252	0.4366	1.9766	3.0619	1.1514	0.522366667	2.0633	1.981818858	0.00782693	0.984535677	no	ADAMTS5	PREDICTED: A disintegrin and metalloproteinase with thrombospondin motifs 5 [Cyprinus carpio]	-	GO:0031012//extracellular matrix	-	-
Unigene0031261	119.6666667	367.6666667	13.7197	7.7818	21.8867	118.3798	24.698	14.3484	14.46273333	52.4754	1.859301024	0.007837872	0.984535677	no	-	--	-	-	-	-
Unigene0027669	38.33333333	87	1.3939	1.2578	1.2686	3.1907	3.1634	3.2836	1.306766667	3.212566667	1.297724833	0.00785485	0.984535677	no	-	--	-	-	-	-
Unigene0017991	3.333333333	16.33333333	0.1558	0.1896	0.0404	0.1949	1.2684	0.6033	0.1286	0.688866667	2.421334127	0.007864461	0.984535677	no	-	PREDICTED: uncharacterized protein LOC108191602 [Danio rerio]	-	-	-	-
Unigene0031638	10.33333333	34	0.3116	1.8201	1.0765	6.1082	2.2951	3.4068	1.0694	3.9367	1.880185193	0.007875766	0.984535677	no	-	--	-	-	-	-
Unigene0053278	253.3333333	582.6666667	3.563	8.6719	2.6672	12.0623	10.1296	14.8071	4.967366667	12.333	1.311970629	0.007876937	0.984535677	no	-	--	-	-	-	-
Unigene0013407	13.33333333	2.333333333	0.5405	1.754	1.3072	0.1127	0.4191	0.1642	1.200566667	0.232	-2.371518807	0.00789169	0.98468188	no	-	--	-	-	-	-
Unigene0070366	26	5.333333333	3.0814	0.7143	1.9771	0.6426	0.512	0.2005	1.924266667	0.4517	-2.090871924	0.007910408	0.985321565	no	-	--	-	-	-	-
Unigene0015084	4.666666667	15.66666667	0.2993	0.3642	0.3877	1.5915	1.1312	1.1589	0.3504	1.293866667	1.884614275	0.007970545	0.990100962	no	-	--	-	-	-	-
Unigene0062468	16.33333333	2.666666667	1.5616	0.3649	1.1654	0.1563	0	0.3415	1.030633333	0.165933333	-2.634855524	0.007976094	0.990100962	no	-	--	-	-	-	-
Unigene0058372	5.666666667	0	0.9891	0	0.9112	0	0	0	0.633433333	0.001	-9.307048978	0.008003449	0.991798345	no	-	--	-	-	-	-
Unigene0069643	5.666666667	0	0.9293	0	1.0836	0	0	0	0.670966667	0.001	-9.390097286	0.008041943	0.992996202	no	-	PREDICTED: BTB/POZ domain-containing protein KCTD1-like [Cynoglossus semilaevis]	-	-	-	-
Unigene0042252	48.66666667	9.666666667	7.274	0.7263	1.0955	0.4668	0.3615	1.0196	3.031933333	0.615966667	-2.299313846	0.00804713	0.992996202	no	DDX59	PREDICTED: probable ATP-dependent RNA helicase DDX59 [Sinocyclocheilus grahami]	-	-	GO:0016817//hydrolase activity, acting on acid anhydrides;GO:0017111//nucleoside-triphosphatase activity;GO:0036094//small molecule binding;GO:0001883//purine nucleoside binding;GO:0016787//hydrolase activity;GO:0042623//ATPase activity, coupled;GO:0016887//ATPase activity;GO:0032549//ribonucleoside binding;GO:0001882//nucleoside binding;GO:0097367//carbohydrate derivative binding;GO:1901363//het…	GO:0009987//cellular process;GO:1901575//organic substance catabolic process;GO:0009154//purine ribonucleotide catabolic process;GO:1901292//nucleoside phosphate catabolic process;GO:1901136//carbohydrate derivative catabolic process;GO:0044763//single-organism cellular process;GO:1901361//organic cyclic compound catabolic process;GO:0044270//cellular nitrogen compound catabolic process;GO:190136…
Unigene0010831	4.333333333	16.33333333	0.458	0.2229	0.3164	1.8146	0.7102	1.5299	0.332433333	1.351566667	2.023495721	0.008058793	0.992996202	no	-	--	-	-	-	-
Unigene0033075	49.33333333	111.6666667	0.888	0.9397	1.0404	3.5749	2.0655	1.6709	0.956033333	2.4371	1.350032624	0.008073793	0.992996202	no	-	--	-	-	-	-
Unigene0029697	62.33333333	361.3333333	1.6973	0.568	1.0629	1.1946	0.6991	16.0447	1.1094	5.979466667	2.43023718	0.008081603	0.992996202	no	Mylpf	myosin light chain-2 [Tanakia koreensis]	ko04510//Focal adhesion//Cellular commiunity//Cellular Processes;ko04810//Regulation of actin cytoskeleton//Cell motility//Cellular Processes;ko04530//Tight junction//Cellular commiunity//Cellular Processes	-	-	-
Unigene0019642	1	7.666666667	0.0916	0.1784	0	1.2614	0.5329	0.5845	0.09	0.792933333	3.139202668	0.008161425	0.99419792	no	-	--	-	-	-	-
Unigene0059848	21.66666667	4	3.0926	0.772	1.315	0	0.4611	0.5057	1.726533333	0.322266667	-2.42155131	0.008164771	0.99419792	no	-	--	-	-	-	-
Unigene0052731	162	428.6666667	1.1214	4.0971	0.8228	8.0407	7.2245	3.2489	2.013766667	6.171366667	1.615693484	0.008167064	0.99419792	no	-	PREDICTED: uncharacterized protein LOC108262767 [Ictalurus punctatus]	-	-	-	-
Unigene0020318	0.666666667	7	0	0.1417	0	1.0015	0.3385	0.3978	0.047233333	0.579266667	3.616350391	0.008187542	0.99419792	no	-	--	-	-	-	-
Unigene0021849	20.33333333	62.66666667	0.6237	0.2819	0.4618	1.7281	0.544	2.131	0.4558	1.4677	1.68708428	0.008194751	0.99419792	no	-	--	-	-	-	-
Unigene0019858	6.333333333	0	0	0.7584	1.7493	0	0	0	0.8359	0.001	-9.707186551	0.008198766	0.99419792	no	-	--	-	-	-	-
Unigene0067282	6	0	0	0.3677	0.4893	0	0	0	0.285666667	0.001	-8.158188893	0.008207772	0.99419792	no	-	--	-	-	-	-
Unigene0066158	6	0	0	0.8058	1.0723	0	0	0	0.626033333	0.001	-9.290095666	0.008208255	0.99419792	no	-	--	-	-	-	-
Unigene0051013	17.33333333	63.33333333	0.8297	0.1553	0.6945	1.2378	1.2247	3.6633	0.559833333	2.041933333	1.86686647	0.008214812	0.99419792	no	zmynd10	PREDICTED: dihydroxyacetone phosphate acyltransferase-like [Sinocyclocheilus anshuiensis]	-	-	-	-
Unigene0018337	24.66666667	64.66666667	0.2837	0.7497	0.4621	2.2567	1.3198	0.9047	0.4985	1.493733333	1.583257206	0.00823456	0.994926997	no	-	PREDICTED: golgin subfamily A member 6-like protein 22 [Cyprinus carpio]	-	-	-	-
Unigene0023811	0.333333333	4.666666667	0	0.1156	0	0.7431	0.6907	0.4329	0.038533333	0.622233333	4.013276786	0.008252708	0.995460645	no	-	--	-	-	-	-
Unigene0061275	1	7.333333333	0	0.2158	0.1149	0.832	0.7733	1.0097	0.110233333	0.871666667	2.983215996	0.008276247	0.996641664	no	-	--	-	-	-	-
Unigene0003986	4.333333333	15	0.4837	0.7064	0.376	2.5725	2.2505	1.3223	0.522033333	2.048433333	1.972307106	0.008319448	0.998326418	no	-	--	-	-	-	-
Unigene0006194	602	1118.666667	15.0064	17.674	16.4257	44.8889	35.0638	22.821	16.3687	34.2579	1.06549697	0.008327911	0.998326418	no	-	--	-	-	-	-
Unigene0012055	19	58.33333333	0.4503	0.2391	0.4879	0.4866	1.952	1.38	0.392433333	1.272866667	1.69756181	0.008331551	0.998326418	no	Mitf	microphthalmia-associated transcription factor a [Cyprinus carpio]	ko04916//Melanogenesis//Endocrine system//Organismal Systems	GO:0031981//nuclear lumen;GO:0044422//organelle part;GO:0043231//intracellular membrane-bounded organelle;GO:0043229//intracellular organelle;GO:0031974//membrane-enclosed lumen;GO:0005634//nucleus;GO:0044464//cell part;GO:0043233//organelle lumen;GO:0043226//organelle;GO:0044424//intracellular part;GO:0043227//membrane-bounded organelle;GO:0044446//intracellular organelle part;GO:0005622//intrac…	GO:0005488//binding;GO:0003700//transcription factor activity, sequence-specific DNA binding;GO:0005515//protein binding;GO:0001071//nucleic acid binding transcription factor activity	GO:0044271//cellular nitrogen compound biosynthetic process;GO:0044238//primary metabolic process;GO:0044249//cellular biosynthetic process;GO:0010467//gene expression;GO:0019438//aromatic compound biosynthetic process;GO:0097659//nucleic acid-templated transcription;GO:0090304//nucleic acid metabolic process;GO:0034645//cellular macromolecule biosynthetic process;GO:0043473//pigmentation;GO:1901…
Unigene0059055	23.66666667	75	3.7629	0.634	0.75	7.0627	5.9755	5.0109	1.715633333	6.016366667	1.810151243	0.008435269	1	no	-	--	-	-	-	-
Unigene0060572	3	11.66666667	0.2749	0.3569	0.19	0.9174	1.4922	1.0855	0.273933333	1.165033333	2.088474498	0.008493726	1	no	-	--	-	-	-	-
Unigene0029505	0.666666667	7.666666667	0	0.1648	0	1.5882	0.3937	0.3084	0.054933333	0.763433333	3.796748438	0.008531751	1	no	-	--	-	-	-	-
Unigene0068319	0.333333333	8.333333333	0	0.0851	0	1.9687	0	0.5575	0.028366667	0.842066667	4.89166592	0.008539092	1	no	-	--	-	-	-	-
Unigene0017964	13	1.666666667	0.8489	0.6611	1.8477	0.4249	0	0.0773	1.119233333	0.1674	-2.741139402	0.008558418	1	no	-	--	-	-	-	-
Unigene0064008	1	10.33333333	0.1122	0.1093	0.1163	3.3702	0.1305	0.6135	0.1126	1.3714	3.606370695	0.00858917	1	no	-	PREDICTED: uncharacterized protein LOC106529713 [Austrofundulus limnaeus]	-	-	-	-
Unigene0056541	1090	449.6666667	6.2107	5.4117	4.9287	1.7516	3.8908	1.8878	5.517033333	2.510066667	-1.136167015	0.008662041	1	no	Tf2-9	Retrotransposable element Tf2 protein type 1 [Larimichthys crocea]	-	-	-	-
Unigene0056711	1964.333333	3491	12.4136	9.59	7.9855	17.0347	20.5473	20.0262	9.996366667	19.20273333	0.941835954	0.008696032	1	no	Nhsl1	PREDICTED: uncharacterized protein KIAA1522 homolog isoform X1 [Sinocyclocheilus anshuiensis]	-	-	-	-
Unigene0014990	12	34.66666667	0.329	0.4805	0.682	1.1836	1.2436	2.0609	0.497166667	1.496033333	1.589340844	0.008739144	1	no	-	--	-	-	-	-
Unigene0012587	3.333333333	12.33333333	0.1318	0.3207	0.2049	1.1541	0.7662	0.7804	0.219133333	0.900233333	2.038490029	0.008744244	1	no	-	--	-	-	-	-
Unigene0057280	11	1.666666667	0.3056	0.9917	0.3695	0.1275	0.0592	0.0928	0.5556	0.093166667	-2.576160817	0.00875353	1	no	DRD3	Dopamine receptor D3 [Danio rerio]	ko04080//Neuroactive ligand-receptor interaction//Signaling molecules and interaction//Environmental Information Processing	GO:0044425//membrane part;GO:0016020//membrane;GO:0016021//integral component of membrane;GO:0031224//intrinsic component of membrane	GO:0099600//transmembrane receptor activity;GO:0004872//receptor activity;GO:0004888//transmembrane signaling receptor activity;GO:0038023//signaling receptor activity;GO:0004930//G-protein coupled receptor activity;GO:0060089//molecular transducer activity;GO:0004871//signal transducer activity	GO:0050896//response to stimulus;GO:0009987//cellular process;GO:0044700//single organism signaling;GO:0007154//cell communication;GO:0007193//adenylate cyclase-inhibiting G-protein coupled receptor signaling pathway;GO:0050794//regulation of cellular process;GO:0007165//signal transduction;GO:0044699//single-organism process;GO:0007187//G-protein coupled receptor signaling pathway, coupled to cy…
Unigene0062593	3	13.66666667	0	0.4193	0.2232	1.3472	1.5026	0.5232	0.214166667	1.124333333	2.392263959	0.008764389	1	no	-	--	-	-	-	-
Unigene0026750	11	0	0.9831	0	0	0	0	0	0.3277	0.001	-8.356231863	0.008772109	1	no	-	--	-	-	-	-
Unigene0003179	87.33333333	191.6666667	1.8058	1.5762	2.0868	6.5709	2.921	3.8013	1.822933333	4.431066667	1.281392231	0.008773791	1	no	-	--	-	-	-	-
Unigene0060568	0	6	0	0	0	0	0.5177	1.4195	0.001	0.645733333	9.334794692	0.008790239	1	no	-	--	-	-	-	-
Unigene0044426	171.3333333	844	10.0941	0.4212	1.8932	13.0817	53.2766	4.1825	4.136166667	23.5136	2.507129211	0.008800619	1	no	rnasel3	PREDICTED: ribonuclease-like 3 [Cyprinus carpio]	-	-	GO:0005488//binding;GO:0004518//nuclease activity;GO:0003824//catalytic activity;GO:1901363//heterocyclic compound binding;GO:0016787//hydrolase activity;GO:0016788//hydrolase activity, acting on ester bonds;GO:0097159//organic cyclic compound binding;GO:0003676//nucleic acid binding	GO:0009653//anatomical structure morphogenesis;GO:0006139//nucleobase-containing compound metabolic process;GO:0006950//response to stress;GO:0051707//response to other organism;GO:0048646//anatomical structure formation involved in morphogenesis;GO:0009617//response to bacterium;GO:0046483//heterocycle metabolic process;GO:0044260//cellular macromolecule metabolic process;GO:0098542//defense res…
Unigene0034803	751	1514.333333	11.2287	7.9968	8.3492	22.0376	11.427	25.5215	9.191566667	19.66203333	1.097029835	0.008805007	1	no	slc5a8	PREDICTED: sodium-coupled monocarboxylate transporter 1 [Sinocyclocheilus rhinocerous]	-	GO:0016020//membrane;GO:0031224//intrinsic component of membrane;GO:0044425//membrane part	GO:0005215//transporter activity;GO:0015291//secondary active transmembrane transporter activity;GO:0022804//active transmembrane transporter activity;GO:0022857//transmembrane transporter activity	GO:0044765//single-organism transport;GO:0015711//organic anion transport;GO:0030001//metal ion transport;GO:0071702//organic substance transport;GO:0046942//carboxylic acid transport;GO:0051234//establishment of localization;GO:0006820//anion transport;GO:0006810//transport;GO:0051179//localization;GO:0015849//organic acid transport;GO:0006811//ion transport;GO:0044699//single-organism process;G…
Unigene0028592	1.333333333	10	0.4586	0	0	2.2954	1.0668	0.6268	0.152866667	1.329666667	3.120718863	0.008857621	1	no	-	--	-	-	-	-
Unigene0060547	22.33333333	4	1.9945	0.9031	0.1923	0.058	0.1079	0.3804	1.029966667	0.1821	-2.49979482	0.008904963	1	no	-	--	-	-	-	-
Unigene0035756	151.3333333	317	2.2019	1.2983	1.2	5.1224	3.2462	2.6844	1.566733333	3.684333333	1.233643946	0.008906266	1	no	SAMD3	PREDICTED: sterile alpha motif domain-containing protein 3-like [Cyprinus carpio]	-	-	-	-
Unigene0028707	1.333333333	11.66666667	0.2547	0.2479	0	0.3187	1.1847	2.9004	0.167533333	1.467933333	3.131266374	0.008908556	1	no	-	--	-	-	-	-
Unigene0003386	6.666666667	0.666666667	1.0884	0.4709	0.8774	0.1513	0.1407	0	0.812233333	0.097333333	-3.060888367	0.008910294	1	no	-	--	-	-	-	-
Unigene0013482	4.333333333	16.33333333	0.4151	0.1617	0.5163	2.7011	1.0622	0.9078	0.364366667	1.557033333	2.095336942	0.008923845	1	no	-	--	-	-	-	-
Unigene0063271	0.333333333	5.333333333	0	0	0.1326	1.4409	0.4464	0.4663	0.0442	0.784533333	4.149716471	0.008937173	1	no	-	--	-	-	-	-
Unigene0054930	0.333333333	6.333333333	0.083	0	0	0.3117	1.3519	0.1513	0.027666667	0.604966667	4.450634912	0.008956347	1	no	-	--	-	-	-	-
Unigene0061056	52	5	14.5427	0.1875	0.2995	0.6026	0.224	0.702	5.0099	0.509533333	-3.297533372	0.009011883	1	no	Spink4	PREDICTED: probable pancreatic secretory proteinase inhibitor [Cyprinus carpio]	-	-	GO:0030234//enzyme regulator activity;GO:0004857//enzyme inhibitor activity;GO:0098772//molecular function regulator	GO:0050794//regulation of cellular process;GO:0032269//negative regulation of cellular protein metabolic process;GO:0032268//regulation of cellular protein metabolic process;GO:0010466//negative regulation of peptidase activity;GO:0048519//negative regulation of biological process;GO:0045861//negative regulation of proteolysis;GO:0044092//negative regulation of molecular function;GO:0010605//nega…
Unigene0026383	122	44	2.5532	1.6279	2.4413	1.1249	0.5019	0.9502	2.207466667	0.859	-1.361661616	0.009024946	1	no	Rnf222	PREDICTED: RING finger protein 222 [Cyprinus carpio]	-	-	-	-
Unigene0007458	5.333333333	18	0.1955	0.5709	0.8104	2.0789	1.705	1.959	0.5256	1.9143	1.864779759	0.009030215	1	no	-	--	-	-	-	-
Unigene0062458	6.333333333	0	0	0.522	1.5559	0	0	0	0.692633333	0.001	-9.435948009	0.009102907	1	no	-	--	-	-	-	-
Unigene0050730	1	7.666666667	0.0841	0	0.1743	0.526	0.4889	0.9959	0.086133333	0.670266667	2.960091619	0.009126529	1	no	-	--	-	-	-	-
Unigene0007631	811	330.6666667	30.8914	58.3231	24.0987	15.7783	19.6813	15.4612	37.77106667	16.9736	-1.153988942	0.009175795	1	no	-	PREDICTED: autoimmune regulator-like [Ficedula albicollis]	-	-	-	-
Unigene0016413	40.33333333	93	1.3885	1.1828	1.655	4.9949	3.916	2.119	1.408766667	3.676633333	1.383952627	0.009196464	1	no	psmb6l-b	PSMB9b-like protein [Salmo salar]	ko03050//Proteasome//Folding, sorting and degradation//Genetic Information Processing	GO:0005623//cell;GO:0005622//intracellular;GO:0043227//membrane-bounded organelle;GO:0000502//proteasome complex;GO:0044424//intracellular part;GO:0043234//protein complex;GO:0043231//intracellular membrane-bounded organelle;GO:0043226//organelle;GO:0032991//macromolecular complex;GO:0043229//intracellular organelle;GO:0044464//cell part	GO:0003824//catalytic activity;GO:0008233//peptidase activity;GO:0070011//peptidase activity, acting on L-amino acid peptides;GO:0016787//hydrolase activity;GO:0004175//endopeptidase activity	GO:0019538//protein metabolic process;GO:0071704//organic substance metabolic process;GO:0008152//metabolic process;GO:0043170//macromolecule metabolic process;GO:0006508//proteolysis;GO:0044238//primary metabolic process
Unigene0026974	11.33333333	36.33333333	0.8519	0.1885	0.2809	2.6163	0.9907	1.1642	0.440433333	1.5904	1.852394096	0.009221795	1	no	Gvin1	PREDICTED: interferon-induced very large GTPase 1-like [Lepisosteus oculatus]	-	-	-	-
Unigene0048431	4.666666667	16	0.4547	0.7746	0.3534	2.7024	2.2474	1.2428	0.527566667	2.0642	1.968157441	0.00927782	1	no	-	--	-	-	-	-
Unigene0073123	10.66666667	30	0.4926	0.3689	0.3534	1.8016	1.5424	0.5869	0.404966667	1.3103	1.694022094	0.009327214	1	notest	-	--	-	-	-	-
Unigene0016159	3.333333333	38.66666667	0.2192	0.0711	0.0757	0	0.1699	3.7279	0.122	1.299266667	3.412744513	0.009332264	1	no	Gin1	PREDICTED: protein NYNRIN-like [Clupea harengus]	-	-	-	-
Unigene0025921	1.333333333	7.666666667	0.1167	0.1136	0.2419	1.1679	0.9499	0.8504	0.1574	0.9894	2.652118359	0.009340801	1	no	-	PREDICTED: poly [ADP-ribose] polymerase 6-like isoform X1 [Sinocyclocheilus rhinocerous]	-	-	-	-
Unigene0036257	18.33333333	64.33333333	0.3597	1.6635	0.4195	7.0895	1.6212	1.4749	0.814233333	3.3952	2.059982372	0.009343114	1	no	-	--	-	-	-	-
Unigene0036994	3.666666667	0	0.4204	0.2046	0.1452	0	0	0	0.256733333	0.001	-8.004126812	0.009368575	1	no	-	--	-	-	-	-
Unigene0026327	0.333333333	5.333333333	0	0	0.1271	1.3808	0.713	0.2234	0.042366667	0.7724	4.188346635	0.009390485	1	no	-	--	-	-	-	-
Unigene0066999	11	32	0.324	0.7491	0.2518	1.4189	1.1304	1.6235	0.441633333	1.390933333	1.655132302	0.009413032	1	no	K02A2.6	Zgc:153522 [Danio rerio]	-	-	-	-
Unigene0018548	4	19	0.4081	0.0397	0.0423	0.4596	1.5188	0.5949	0.163366667	0.857766667	2.392471607	0.009448744	1	no	Chl1	PREDICTED: neural cell adhesion molecule L1-like protein isoform X4 [Sinocyclocheilus anshuiensis]	-	-	-	-
Unigene0042110	0	3.666666667	0	0	0	0.6156	0.0954	0.2988	0.001	0.3366	8.394891366	0.009478592	1	no	-	PREDICTED: LOW QUALITY PROTEIN: Werner syndrome ATP-dependent helicase-like [Cyprinus carpio]	-	-	-	-
Unigene0021424	48.33333333	14	5.909	6.4718	2.8435	1.8485	0.4909	2.3074	5.074766667	1.548933333	-1.712066439	0.009499931	1	no	-	--	-	-	-	-
Unigene0063001	4.333333333	15.33333333	0.1009	0.2456	0.3137	1.1362	0.5867	0.8274	0.220066667	0.8501	1.949691922	0.009547994	1	no	-	--	-	-	-	-
Unigene0025153	1.333333333	9.333333333	0	0.1882	0.2004	1.5724	0.3373	1.0569	0.129533333	0.988866667	2.932452609	0.009585649	1	no	-	--	-	-	-	-
Unigene0065414	2.666666667	11.33333333	0.3374	0.2463	0.0874	0.7388	0.8829	1.3833	0.2237	1.001666667	2.162765329	0.009601901	1	no	-	--	-	-	-	-
Unigene0055456	27	69	0.5273	0.6624	0.1763	1.2771	1.4046	1.1779	0.455333333	1.286533333	1.498493854	0.009608488	1	no	-	--	-	-	-	-
Unigene0016157	5	46	0	0.1905	0.3043	0.2041	0.1517	3.8337	0.164933333	1.3965	3.081860669	0.009610335	1	no	POL	LReO_3 [Oryzias latipes]	-	-	-	-
Unigene0061406	0	3.666666667	0	0	0	0.1916	0.6232	0.1395	0.001	0.3181	8.313336562	0.00962825	1	no	-	--	-	-	-	-
Unigene0029220	38.33333333	10.66666667	0.5832	0.8753	1.36	0.0608	0.1978	0.5092	0.9395	0.255933333	-1.876125102	0.00964468	1	no	GRM3	metabotropic glutamate receptor 3 precursor [Danio rerio]	ko04080//Neuroactive ligand-receptor interaction//Signaling molecules and interaction//Environmental Information Processing	GO:0016020//membrane;GO:0044425//membrane part;GO:0031224//intrinsic component of membrane	GO:0004872//receptor activity;GO:0099600//transmembrane receptor activity;GO:0038023//signaling receptor activity;GO:0004871//signal transducer activity;GO:0060089//molecular transducer activity;GO:0004888//transmembrane signaling receptor activity	GO:0009987//cellular process;GO:0044700//single organism signaling;GO:0050789//regulation of biological process;GO:0044699//single-organism process;GO:0050794//regulation of cellular process;GO:0065007//biological regulation;GO:0007165//signal transduction;GO:0051716//cellular response to stimulus;GO:0007166//cell surface receptor signaling pathway;GO:0007154//cell communication;GO:0023052//signa…
Unigene0066553	8.333333333	1	0.6327	0.704	0.9369	0	0.3154	0	0.757866667	0.105133333	-2.849723894	0.009660709	1	no	-	--	-	-	-	-
Unigene0005758	2	12.33333333	0.0913	0.3556	0.0947	0.7999	0.5311	2.0803	0.180533333	1.1371	2.655021991	0.009673314	1	no	-	--	-	-	-	-
Unigene0007665	1.333333333	9.666666667	0	0.1211	0.3866	2.1782	1.7354	0.3399	0.169233333	1.417833333	3.066602289	0.009705971	1	no	-	--	-	-	-	-
Unigene0055411	4	17.66666667	0	0.7584	0.1615	1.2671	1.9025	1.3485	0.306633333	1.506033333	2.296167259	0.00971688	1	no	-	--	-	-	-	-
Unigene0032323	94	193.3333333	1.767	2.3004	1.725	5.5277	3.6801	3.9501	1.9308	4.385966667	1.183696116	0.009739099	1	no	-	--	-	-	-	-
Unigene0068532	0.333333333	6.333333333	0	0.1107	0	1.849	0.1322	0.5178	0.0369	0.833	4.496623774	0.009762786	1	no	-	PREDICTED: nesprin-1-like [Sinocyclocheilus rhinocerous]	-	-	-	-
Unigene0051015	0	3.333333333	0	0	0	0.2484	0.1385	0.0724	0.001	0.1531	7.258330473	0.009791403	1	no	-	UPF0670 protein [Larimichthys crocea]	-	-	-	-
Unigene0060852	1.333333333	8.666666667	0.1177	0.1146	0.244	1.6202	0.4107	1.287	0.158766667	1.105966667	2.800327951	0.009791636	1	no	-	--	-	-	-	-
Unigene0040350	216	429	2.7411	3.3729	2.0914	8.8131	5.3429	4.2782	2.735133333	6.144733333	1.167739239	0.009805954	1	no	-	--	-	-	-	-
Unigene0007187	98.66666667	19	3.3994	10.7682	0.5785	1.0158	0.236	1.7105	4.915366667	0.987433333	-2.315543787	0.009809792	1	no	-	immunoglobulin mu heavy chain, partial [Danio rerio]	-	-	-	-
Unigene0064184	1	7.666666667	0	0.1627	0.0866	1.0454	0.2915	0.7612	0.0831	0.699366667	3.073128654	0.009832173	1	no	-	--	-	-	-	-
Unigene0019898	0.666666667	6.666666667	0.1157	0	0.1199	1.7366	0.6726	0.3161	0.078533333	0.908433333	3.532003606	0.009840668	1	no	-	--	-	-	-	-
Unigene0052985	0.333333333	7.666666667	0.0774	0	0	0	0.9907	0.8467	0.0258	0.612466667	4.569188357	0.009842355	1	no	-	PREDICTED: coxsackievirus and adenovirus receptor homolog [Sinocyclocheilus rhinocerous]	-	-	-	-
Unigene0046862	0.333333333	6.666666667	0	0	0.1111	2.1467	0.2494	0.1954	0.037033333	0.863833333	4.543856672	0.009895502	1	no	-	--	-	-	-	-
Unigene0060819	0.666666667	6	0	0.1161	0.1237	1.1942	0.8325	0.4348	0.079933333	0.8205	3.359634176	0.009906213	1	no	-	--	-	-	-	-
Unigene0052047	237	93	5.8073	3.1695	3.575	1.0129	1.8625	2.2769	4.183933333	1.717433333	-1.284605766	0.009928775	1	no	PPP2R5D	PREDICTED: serine/threonine-protein phosphatase 2A 56 kDa regulatory subunit delta isoform-like [Cyprinus carpio]	ko04261//Adrenergic signaling in cardiomyocytes//Circulatory system//Organismal Systems;ko04114//Oocyte meiosis//Cell growth and death//Cellular Processes;ko03015//mRNA surveillance pathway//Translation//Genetic Information Processing	GO:1902494//catalytic complex;GO:0032991//macromolecular complex;GO:0044464//cell part;GO:0005623//cell;GO:0043234//protein complex;GO:0008287//protein serine/threonine phosphatase complex;GO:1903293//phosphatase complex	-	GO:0044763//single-organism cellular process;GO:0007154//cell communication;GO:0009987//cellular process;GO:0044699//single-organism process
Unigene0060206	7.333333333	0	0.6428	0	0.0666	0	0	0	0.236466667	0.001	-7.885493019	0.009932155	1	no	colec10	PREDICTED: collectin-10-like [Sinocyclocheilus anshuiensis]	-	-	-	-
Unigene0069221	14.66666667	2.333333333	1.3621	0.2947	1.7255	0	0.176	0.3447	1.127433333	0.173566667	-2.699480316	0.009942687	1	no	-	--	-	-	-	-
Unigene0051843	107	30.33333333	12.5178	3.8484	26.7683	5.441	3.678	4.0819	14.37816667	4.4003	-1.708205941	0.009949013	1	no	-	--	-	-	-	-
Unigene0057020	275	557.6666667	3.7441	1.7329	3.0219	5.0946	7.448	6.0492	2.832966667	6.197266667	1.129318422	0.009962085	1	no	ALPL	PREDICTED: alkaline phosphatase-like [Sinocyclocheilus rhinocerous]	ko01100//Metabolic pathways//Global and Overview//Metabolism;ko00790//Folate biosynthesis//Metabolism of cofactors and vitamins//Metabolism	-	GO:0016787//hydrolase activity;GO:0016788//hydrolase activity, acting on ester bonds;GO:0042578//phosphoric ester hydrolase activity;GO:0016791//phosphatase activity;GO:0003824//catalytic activity	GO:0006796//phosphate-containing compound metabolic process;GO:0009987//cellular process;GO:0044237//cellular metabolic process;GO:0008152//metabolic process;GO:0006793//phosphorus metabolic process
Unigene0066127	1.333333333	9	0	0.4013	0	1.4185	0.9589	0.7512	0.133766667	1.042866667	2.962764157	0.009971627	1	no	-	--	-	-	-	-
Unigene0053311	10.33333333	30.66666667	0.9101	0.8861	1.0377	5.3526	1.6936	2.4049	0.944633333	3.150366667	1.737693402	0.00998689	1	no	-	--	-	-	-	-
Unigene0004133	447.3333333	69.66666667	1.3264	51.8189	2.9713	4.5508	2.3886	2.9628	18.70553333	3.300733333	-2.502606608	0.009992655	1	no	l-2	PREDICTED: ladderlectin-like [Cyprinus carpio]	-	-	-	-
Unigene0023891	5.333333333	0.333333333	0.7603	0.3701	0.9194	0	0	0.1155	0.683266667	0.0385	-4.149518395	0.009997433	1	no	-	--	-	-	-	-
Unigene0063531	0	4.333333333	0	0	0	1.5933	0.2962	0.116	0.001	0.6685	9.38478375	0.010003951	1	no	-	--	-	-	-	-
Unigene0052136	0.666666667	7	0	0.1211	0.1289	1.8671	0.2892	0.7931	0.083333333	0.983133333	3.560421495	0.01000779	1	no	-	--	-	-	-	-
Unigene0046067	0	5.666666667	0	0	0	0	0.3184	0.8106	0.001	0.376333333	8.55586727	0.010008144	1	no	-	--	-	-	-	-
Unigene0033496	11.66666667	1.333333333	2.7264	0.632	1.2111	0.4874	0.151	0	1.523166667	0.2128	-2.839503756	0.010043944	1	no	-	Xin actin-binding repeat-containing protein 1 [Cricetulus griseus]	-	-	-	-
Unigene0030519	88	31.33333333	4.3393	6.9924	8.53	1.5915	1.9143	3.7492	6.620566667	2.418333333	-1.452941592	0.010052245	1	no	-	--	-	-	-	-
Unigene0038536	11.66666667	2	2.0818	0.7882	1.1987	0.4342	0	0.3161	1.356233333	0.2501	-2.439028446	0.010058239	1	no	-	--	-	-	-	-
Unigene0026501	13	1.666666667	1.4125	1.0314	0.2928	0.1767	0.2464	0	0.912233333	0.141033333	-2.693366703	0.010108816	1	no	-	--	-	-	-	-
Unigene0066386	0	4	0	0	0	1.0197	0.1185	0.2784	0.001	0.4722	8.883254231	0.010112684	1	no	-	--	-	-	-	-
Unigene0051310	0	4	0	0	0	0.6868	0.0798	0.1876	0.001	0.318066667	8.313185375	0.010116457	1	no	-	--	-	-	-	-
Unigene0010187	27.66666667	72.66666667	0.7421	0.9716	0.3978	3.234	2.3809	0.8627	0.703833333	2.1592	1.617191135	0.010191818	1	no	-	--	-	-	-	-
Unigene0064169	1	7.333333333	0.0815	0	0.1689	0.7138	1.0426	0.297	0.083466667	0.684466667	3.035708223	0.01030373	1	no	-	--	-	-	-	-
Unigene0011707	286	540.6666667	2.8781	2.4132	1.845	4.6838	5.853	4.2973	2.378766667	4.9447	1.055669229	0.010315514	1	no	FAM134B	PREDICTED: reticulophagy receptor FAM134B-like [Sinocyclocheilus rhinocerous]	-	-	-	-
Unigene0033958	68.33333333	155.3333333	1.7729	1.7526	2.0921	7.7134	2.6965	3.8521	1.872533333	4.754	1.344150503	0.010318569	1	no	-	--	-	-	-	-
Unigene0015563	1.333333333	8.666666667	0.1872	0.0911	0.097	1.6395	0.3265	0.7674	0.1251	0.911133333	2.864580401	0.01032206	1	no	-	--	-	-	-	-
Unigene0023145	2.333333333	13.33333333	0.0571	0.3334	0	0.9285	0.2655	1.1962	0.130166667	0.796733333	2.613736887	0.010330896	1	no	-	--	-	-	-	-
Unigene0040764	20.66666667	4.333333333	1.6733	1.1797	0.7177	0.1444	0	0.5783	1.190233333	0.2409	-2.304738128	0.010340543	1	no	xk70a	PREDICTED: keratin, type I cytoskeletal 19-like [Sinocyclocheilus grahami]	-	GO:0043234//protein complex;GO:0032991//macromolecular complex	-	-
Unigene0038662	2.333333333	11.33333333	0.1255	0.2444	0.5204	2.8271	1.0219	1.0293	0.296766667	1.6261	2.454015021	0.010351874	1	no	-	--	-	-	-	-
Unigene0013643	13.66666667	3.333333333	0.9326	0.7869	0.8377	0.2334	0.2169	0.2266	0.8524	0.225633333	-1.917550377	0.010376302	1	no	-	--	-	-	-	-
Unigene0003839	4	24.33333333	0.213	0.1383	0.5152	5.242	0.1652	0.7763	0.288833333	2.061166667	2.835152013	0.010382381	1	no	-	PREDICTED: G2/M phase-specific E3 ubiquitin-protein ligase-like [Cyprinus carpio]	-	-	-	-
Unigene0060850	0	3.666666667	0	0	0	0.6933	0.6444	0.101	0.001	0.479566667	8.905587574	0.010404918	1	no	-	--	-	-	-	-
Unigene0052889	4	18	0.0943	0.1835	0.8792	1.4152	1.4251	2.4904	0.385666667	1.7769	2.203936128	0.010409162	1	no	-	--	-	-	-	-
Unigene0017213	0	3.333333333	0	0	0	0.2762	0.3423	0.2011	0.001	0.2732	8.093813673	0.010426057	1	no	Csmd3	PREDICTED: CUB and sushi domain-containing protein 3-like [Sinocyclocheilus grahami]	-	-	-	-
Unigene0053069	580.3333333	1424.333333	1.7159	1.219	4.5315	12.2021	3.5844	4.721	2.4888	6.835833333	1.457666923	0.01046503	1	no	SPTBN5	PREDICTED: spectrin beta chain, non-erythrocytic 2-like [Sinocyclocheilus rhinocerous]	-	-	-	-
Unigene0062337	3	14	0.2836	0.0552	0.1763	1.5612	0.9234	0.31	0.1717	0.931533333	2.439717355	0.010486927	1	no	G2E3	PREDICTED: G2/M phase-specific E3 ubiquitin-protein ligase-like [Sinocyclocheilus rhinocerous]	-	-	-	-
Unigene0024587	0.333333333	5.333333333	0	0	0.0478	0.2309	0.1073	0.4204	0.015933333	0.252866667	3.988256848	0.010507458	1	no	CHL1	PREDICTED: neural cell adhesion molecule L1-like protein isoform X2 [Sinocyclocheilus grahami]	-	-	-	-
Unigene0060668	0.333333333	4.666666667	0.1209	0	0	0.454	0.9846	0.4408	0.0403	0.626466667	3.958386004	0.010511177	1	no	-	--	-	-	-	-
Unigene0029472	4.666666667	16.66666667	0.0497	0.2903	0.3605	1.3057	0.8091	0.6791	0.2335	0.9313	1.995823429	0.010535523	1	no	CDK18	PREDICTED: cyclin-dependent kinase 18-like [Cyprinus carpio]	-	-	-	-
Unigene0067423	18.66666667	2	0.9066	2.6478	0	0.1621	0.1506	0.118	1.1848	0.143566667	-3.044850818	0.010540674	1	no	-	--	-	-	-	-
Unigene0046254	49.66666667	16	2.9033	2.8265	3.132	1.1862	1.4471	0.5938	2.953933333	1.0757	-1.457361483	0.010558142	1	no	-	PREDICTED: mucin-2-like [Cyprinus carpio]	-	-	-	-
Unigene0019640	4	19.33333333	0.1395	0.0543	0.1446	0.873	0.0649	0.7883	0.1128	0.5754	2.350798153	0.01059545	1	no	SLITRK6	PREDICTED: LOW QUALITY PROTEIN: SLIT and NTRK-like protein 6 [Cyprinus carpio]	-	-	-	-
Unigene0024728	0	3.333333333	0	0	0	0.0499	0.0928	0.0727	0.001	0.0718	6.165911939	0.010635074	1	no	Col25a1	PREDICTED: collagen alpha-1(XXV) chain [Sinocyclocheilus grahami]	-	-	-	-
Unigene0050698	29	6.666666667	2.6062	1.3715	2.1903	0	0.2458	1.0911	2.056	0.445633333	-2.205911209	0.010641941	1	no	-	PREDICTED: uncharacterized protein LOC109048274 [Cyprinus carpio]	-	-	-	-
Unigene0021835	0	6	0	0	0	0.05	0.3717	0	0.001	0.140566667	7.135110711	0.01064473	1	no	ntf7	PREDICTED: neurotrophin-7-like [Sinocyclocheilus anshuiensis]	ko04010//MAPK signaling pathway//Signal transduction//Environmental Information Processing;ko04210//Apoptosis//Cell growth and death//Cellular Processes	-	GO:0005515//protein binding;GO:0005488//binding;GO:0005102//receptor binding	-
Unigene0058874	921.6666667	1742	2.9998	3.689	1.6648	6.2079	4.8378	6.147	2.784533333	5.7309	1.041326159	0.010649102	1	no	Helz2	PREDICTED: helicase with zinc finger domain 2-like [Sinocyclocheilus grahami]	-	-	-	-
Unigene0010176	10	27.33333333	0.5926	0.3994	0.378	1.8253	1.4315	0.9553	0.456666667	1.404033333	1.620363795	0.010664031	1	no	-	--	-	-	-	-
Unigene0061906	2.333333333	12	0.3668	0	0.1521	1.5606	0.6826	0.7353	0.172966667	0.992833333	2.521057518	0.010675506	1	no	-	--	-	-	-	-
Unigene0062450	8.333333333	0.666666667	1.0637	0.1036	1.5434	0.1331	0	0.0969	0.903566667	0.076666667	-3.558959689	0.010688554	1	no	TRIM16	PREDICTED: neoverrucotoxin subunit beta-like [Sinocyclocheilus rhinocerous]	-	-	-	-
Unigene0017307	19	48	0.646	0.4267	0.2391	1.1547	1.2343	1.2192	0.437266667	1.202733333	1.459731528	0.010778372	1	no	-	PREDICTED: uncharacterized protein LOC106939156 [Poecilia latipinna]	-	-	-	-
Unigene0071265	1	7.333333333	0.2354	0	0.122	1.6202	0.9583	0.429	0.119133333	1.0025	3.072953198	0.01082384	1	no	-	--	-	-	-	-
Unigene0018610	7.666666667	23.66666667	0.4013	0.2232	0.713	1.5064	2.0669	0.9924	0.445833333	1.5219	1.771297176	0.010838635	1	no	-	--	-	-	-	-
Unigene0050522	1.333333333	9	0.1714	0	0.1777	0.3218	1.3956	0.781	0.116366667	0.8328	2.839292212	0.010907744	1	no	-	--	-	-	-	-
Unigene0063183	8.333333333	0.333333333	0	0.8815	1.9943	0	0	0.1031	0.9586	0.034366667	-4.801847108	0.010913494	1	no	-	--	-	-	-	-
Unigene0069115	0	3.333333333	0	0	0	0.1573	0.0975	0.1909	0.001	0.148566667	7.21496665	0.010918866	1	no	KCNK5	PREDICTED: potassium channel subfamily K member 17-like [Sinocyclocheilus anshuiensis]	-	-	-	-
Unigene0071744	1	7	0.073	0.1421	0	0.4565	0.5091	0.6648	0.0717	0.543466667	2.922146527	0.01095332	1	no	-	--	-	-	-	-
Unigene0046784	4	14.33333333	0.2153	0.2096	0.4464	1.886	0.8348	0.7848	0.290433333	1.168533333	2.008419941	0.010979872	1	no	-	--	-	-	-	-
Unigene0008079	415.3333333	20.33333333	0	145.7908	4.6179	7.4334	1.2955	0.4511	50.13623333	3.06	-4.034250055	0.011141364	1	no	-	immunoglobulin zeta heavy chain, partial [Danio rerio]	-	-	-	-
Unigene0008048	0	3.333333333	0	0	0	0.2432	0.113	0.1771	0.001	0.177766667	7.473841017	0.011142531	1	no	-	--	-	-	-	-
Unigene0011693	0	3.333333333	0	0	0	0.3993	0.1856	0.2907	0.001	0.291866667	8.189165644	0.011144702	1	no	-	--	-	-	-	-
Unigene0006038	3	18.33333333	0.1081	0.6315	0.2241	5.8165	1.383	0.0985	0.321233333	2.432666667	2.920845141	0.011155084	1	no	-	--	-	-	-	-
Unigene0056375	104	31	3.6575	0.9841	1.1049	0.391	0.9192	0.5526	1.9155	0.620933333	-1.625210739	0.011189659	1	no	-	PREDICTED: zinc finger protein 2-like isoform X1 [Sinocyclocheilus anshuiensis]	-	-	-	-
Unigene0072767	0.666666667	6	0	0.1211	0.1289	0.9335	0.4338	1.0196	0.083333333	0.795633333	3.255138125	0.011192749	1	notest	-	--	-	-	-	-
Unigene0054929	3.333333333	0	0.2935	0.2857	0.1521	0	0	0	0.243766667	0.001	-7.929357051	0.011196968	1	no	-	--	-	-	-	-
Unigene0044252	6	21	0.8184	0.0724	0.4627	2.3273	1.9901	1.0168	0.451166667	1.778066667	1.978577031	0.011296489	1	no	-	--	-	-	-	-
Unigene0049979	23.66666667	4.666666667	3.0623	1.531	1.2868	0.3107	0.9626	0.0754	1.960033333	0.449566667	-2.124271214	0.011308339	1	no	-	--	-	-	-	-
Unigene0058477	11	0.666666667	0.9761	1.1403	0	0	0.1514	0	0.705466667	0.050466667	-3.805175212	0.011375244	1	no	-	--	-	-	-	-
Unigene0051374	2089.333333	3944.666667	27.7207	38.7275	26.7568	88.1322	34.9241	68.9897	31.06833333	64.01533333	1.04297266	0.011389989	1	no	UBI1	ubquitin-like protein 1 [Carassius auratus]	ko03320//PPAR signaling pathway//Endocrine system//Organismal Systems	-	-	-
Unigene0013957	3.333333333	0	0.182	0.3544	0.3773	0	0	0	0.304566667	0.001	-8.250614244	0.011418801	1	no	ADAMTS20	PREDICTED: A disintegrin and metalloproteinase with thrombospondin motifs 20-like [Sinocyclocheilus grahami]	-	-	-	-
Unigene0016029	2.333333333	10.66666667	0.1129	0.11	0.1756	0.636	1.0509	0.3602	0.132833333	0.682366667	2.36092995	0.011441047	1	no	CHL1	PREDICTED: neural cell adhesion molecule L1-like protein [Cyprinus carpio]	-	-	-	-
Unigene0011807	10.33333333	28.33333333	0.2129	0.5804	0.5296	1.705	1.139	1.1639	0.440966667	1.335966667	1.599142502	0.011449793	1	no	-	unnamed protein product [Oncorhynchus mykiss]	-	-	-	-
Unigene0066724	1.333333333	11	0.1731	0.0843	0.0897	0.9747	0.1007	1.8138	0.1157	0.963066667	3.057246805	0.011468061	1	no	-	--	-	-	-	-
Unigene0064866	2.666666667	12	0.0883	0.2578	0.366	1.3256	0.6161	1.4479	0.237366667	1.129866667	2.250963276	0.011480288	1	no	-	--	-	-	-	-
Unigene0009802	17	3.333333333	0.1314	0.4479	0.2554	0.0822	0	0.0898	0.278233333	0.057333333	-2.278849206	0.011521392	1	no	ANKRD6	PREDICTED: ankyrin repeat domain-containing protein 6-like [Sinocyclocheilus rhinocerous]	-	-	-	-
Unigene0066632	0.666666667	7.333333333	0	0	0.2366	1.9999	0.2655	0.6241	0.078866667	0.963166667	3.610297891	0.011563628	1	no	-	--	-	-	-	-
Unigene0033757	42.66666667	97.66666667	0.9143	1.3782	1.4979	4.3178	2.0238	3.1441	1.263466667	3.1619	1.323404138	0.011586889	1	no	-	--	-	-	-	-
Unigene0043266	560.6666667	1093	6.3659	3.5489	8.3702	17.0344	11.1807	10.9635	6.095	13.05953333	1.099405219	0.011587201	1	no	Rnf166	PREDICTED: RING finger protein 166 [Danio rerio]	-	-	GO:0043167//ion binding;GO:0005488//binding;GO:0043169//cation binding	-
Unigene0022657	0.333333333	4.666666667	0	0	0.1002	0.8467	0.3373	0.3523	0.0334	0.5121	3.938505551	0.011589363	1	no	-	--	-	-	-	-
Unigene0021748	3.333333333	0	0.2441	0.1188	0.253	0	0	0	0.2053	0.001	-7.681589817	0.011592105	1	no	RELL1	PREDICTED: RELT-like protein 2, partial [Sinocyclocheilus grahami]	-	-	-	-
Unigene0073012	5.333333333	0	0	0.401	0.2562	0	0	0	0.219066667	0.001	-7.775226169	0.011600441	1	notest	-	PREDICTED: LOW QUALITY PROTEIN: immunoglobulin superfamily member 10-like [Sinocyclocheilus anshuiensis]	-	-	-	-
Unigene0011765	2.333333333	10.33333333	0.091	0.1772	0.0472	0.5694	0.5293	0.4561	0.105133333	0.518266667	2.301474448	0.011608635	1	no	-	--	-	-	-	-
Unigene0042003	1.333333333	8.333333333	0.0999	0	0.3108	1.1255	1.2786	0.4553	0.1369	0.953133333	2.7995556	0.011652673	1	no	-	--	-	-	-	-
Unigene0032800	256.6666667	497.3333333	9.3085	13.0181	5.9726	20.9843	21.6095	18.006	9.433066667	20.19993333	1.098551763	0.011699113	1	no	-	--	-	-	-	-
Unigene0047069	5	16.66666667	0.4796	0.2075	0.1105	1.1336	1.1156	0.7283	0.265866667	0.9925	1.900364193	0.011699372	1	no	-	--	-	-	-	-
Unigene0032356	1.333333333	19.33333333	0	0.2108	0.0748	0.3612	0	3.5507	0.0952	1.303966667	3.775801607	0.011714731	1	no	-	--	-	-	-	-
Unigene0007044	1	8.333333333	0	0	0.3242	1.9571	0.7276	0.38	0.108066667	1.021566667	3.240789861	0.011716058	1	no	-	--	-	-	-	-
Unigene0028729	13.33333333	39	0.4124	0.9814	0.4274	3.8415	1.3856	1.002	0.607066667	2.076366667	1.774134369	0.011761977	1	no	-	PREDICTED: RNA-directed DNA polymerase from mobile element jockey-like [Danio rerio]	-	-	-	-
Unigene0037878	116.3333333	243	0.9456	1.3253	0.5576	2.3256	1.9056	2.2282	0.942833333	2.153133333	1.191362991	0.011785845	1	no	Epor	PREDICTED: erythropoietin receptor-like isoform X1 [Cyprinus carpio]	ko04060//Cytokine-cytokine receptor interaction//Signaling molecules and interaction//Environmental Information Processing;ko04630//Jak-STAT signaling pathway//Signal transduction//Environmental Information Processing	GO:0031224//intrinsic component of membrane;GO:0016020//membrane;GO:0044425//membrane part	GO:0004871//signal transducer activity;GO:0004872//receptor activity;GO:0038023//signaling receptor activity;GO:0060089//molecular transducer activity	-
Unigene0045284	186.3333333	378.3333333	3.1902	3.2377	1.9653	6.7034	4.2529	7.3491	2.797733333	6.1018	1.124976435	0.011798862	1	no	Trim39	PREDICTED: E3 ubiquitin-protein ligase TRIM39-like [Cyprinus carpio]	-	-	-	-
Unigene0049051	632.3333333	1239	15.8033	9.8559	12.3107	21.1211	21.0222	35.6434	12.65663333	25.9289	1.034667304	0.011805108	1	no	-	--	-	-	-	-
Unigene0057319	0.666666667	5.333333333	0	0.075	0.0798	0.578	0.4477	0.3507	0.0516	0.4588	3.152422421	0.011874176	1	no	-	--	-	-	-	-
Unigene0002804	34.66666667	83	0.8466	0.6181	1.7235	2.9509	3.1295	2.2589	1.062733333	2.779766667	1.387184155	0.011892828	1	no	-	PREDICTED: receptor-type tyrosine-protein phosphatase mu-like [Cyprinus carpio]	-	-	-	-
Unigene0042675	6.666666667	0.666666667	0.8704	0.3632	1.2888	0	0.1446	0.1133	0.8408	0.085966667	-3.289913397	0.01191808	1	no	Lhx6	LIM/homeobox protein 6, partial [Astyanax mexicanus]	-	GO:0043226//organelle;GO:0043231//intracellular membrane-bounded organelle;GO:0005622//intracellular;GO:0044464//cell part;GO:0044424//intracellular part;GO:0043229//intracellular organelle;GO:0043227//membrane-bounded organelle;GO:0005623//cell	GO:0003676//nucleic acid binding;GO:0043167//ion binding;GO:1901363//heterocyclic compound binding;GO:0097159//organic cyclic compound binding;GO:0046872//metal ion binding;GO:0001071//nucleic acid binding transcription factor activity;GO:0046914//transition metal ion binding;GO:0043169//cation binding;GO:0005488//binding;GO:0003677//DNA binding	GO:0018130//heterocycle biosynthetic process;GO:0009058//biosynthetic process;GO:0009059//macromolecule biosynthetic process;GO:0008152//metabolic process;GO:0044249//cellular biosynthetic process;GO:1901576//organic substance biosynthetic process;GO:0044238//primary metabolic process;GO:0044260//cellular macromolecule metabolic process;GO:0090304//nucleic acid metabolic process;GO:0097659//nucle…
Unigene0071844	8	1	0.8978	0.9615	0.2792	0	0.1044	0.1636	0.712833333	0.089333333	-2.996294301	0.011963712	1	no	-	--	-	-	-	-
Unigene0022604	5.333333333	40	0.3018	0	0.9385	2.8325	7.8105	0.0688	0.413433333	3.5706	3.110439907	0.012019354	1	no	IGKV4-1	immunoglobulin light chain, partial [Cyprinus carpio]	-	-	-	-
Unigene0062675	6.333333333	0.666666667	0.685	0.778	0.7099	0.2857	0	0	0.7243	0.095233333	-2.92704884	0.01202361	1	no	-	--	-	-	-	-
Unigene0051380	15	46	1.3582	0.4722	2.6144	8.7403	3.6106	3.0054	1.4816	5.118766667	1.78864024	0.012061277	1	no	-	--	-	-	-	-
Unigene0064603	3.666666667	0	0.5113	0.0996	0.5299	0	0	0	0.380266667	0.001	-8.570867671	0.012070381	1	no	asic4	PREDICTED: acid-sensing ion channel 4-like [Danio rerio]	-	GO:0016021//integral component of membrane;GO:0031224//intrinsic component of membrane;GO:0016020//membrane;GO:0044425//membrane part	GO:0022838//substrate-specific channel activity;GO:0022892//substrate-specific transporter activity;GO:0005215//transporter activity;GO:0022857//transmembrane transporter activity;GO:0005216//ion channel activity;GO:0022891//substrate-specific transmembrane transporter activity;GO:0015267//channel activity;GO:0008324//cation transmembrane transporter activity;GO:0022803//passive transmembrane tra…	GO:0030001//metal ion transport;GO:0006812//cation transport;GO:0006811//ion transport;GO:0051234//establishment of localization;GO:1902578//single-organism localization;GO:0044765//single-organism transport;GO:0006810//transport;GO:0044699//single-organism process;GO:0051179//localization
Unigene0003515	6.666666667	23.66666667	0.1276	0.6834	0.463	1.3576	0.9649	2.3841	0.424666667	1.568866667	1.88531997	0.012109031	1	no	-	PREDICTED: LOW QUALITY PROTEIN: A disintegrin and metalloproteinase with thrombospondin motifs 12-like [Sinocyclocheilus rhinocerous]	-	-	-	-
Unigene0055250	7.333333333	1	0.7256	0.4415	0.8461	0.1135	0	0.1653	0.671066667	0.092933333	-2.852188037	0.012114853	1	no	-	--	-	-	-	-
Unigene0068125	0.333333333	6.666666667	0	0.0793	0	0.9177	1.0426	0	0.026433333	0.653433333	4.627609782	0.012118759	1	no	samhd1	PREDICTED: deoxynucleoside triphosphate triphosphohydrolase SAMHD1-like [Sinocyclocheilus grahami]	-	-	-	-
Unigene0029025	278.6666667	67	5.2236	1.0927	12.1259	2.3228	0.3264	2.006	6.1474	1.551733333	-1.986095711	0.012122305	1	no	-	PREDICTED: uncharacterized protein LOC103385744 [Cynoglossus semilaevis]	-	-	-	-
Unigene0022579	0.333333333	5.666666667	0	0.084	0	0.6477	0.1003	0.786	0.028	0.511333333	4.190765345	0.012139318	1	no	-	--	-	-	-	-
Unigene0052668	5.333333333	30.66666667	0.8828	0.2344	0.1664	0.1004	3.4537	3.9488	0.427866667	2.500966667	2.547252635	0.012206278	1	no	-	--	-	-	-	-
Unigene0027113	1.333333333	9.666666667	0	0.4865	0	2.3448	0.5812	1.1383	0.162166667	1.354766667	3.062495186	0.012207817	1	no	-	--	-	-	-	-
Unigene0008149	1.666666667	10.66666667	0.1488	0.0966	0	1.2412	0.5192	0.1356	0.0818	0.632	2.94975181	0.012272714	1	no	gpt2l	PREDICTED: alanine aminotransferase 2-like [Sinocyclocheilus grahami]	ko01100//Metabolic pathways//Global and Overview//Metabolism;ko01120//Microbial metabolism in diverse environments//Global and Overview//Metabolism;ko01200//Carbon metabolism//Global and Overview//Metabolism;ko01230//Biosynthesis of amino acids//Global and Overview//Metabolism;ko00250//Alanine, aspartate and glutamate metabolism//Amino acid metabolism//Metabolism;ko00220//Arginine biosynthesis//A…	-	-	-
Unigene0026804	3.333333333	0	0.6367	0.2479	0.3959	0	0	0	0.426833333	0.001	-8.737529037	0.012350184	1	no	-	--	-	-	-	-
Unigene0009188	5.666666667	0.333333333	0.0988	0.0481	0.2817	0	0	0.0225	0.142866667	0.0075	-4.251634943	0.012351749	1	no	-	--	-	-	-	-
Unigene0071681	1	7	0	0.1136	0.2419	0.584	1.0856	0.9568	0.1185	0.875466667	2.88516519	0.01238305	1	no	-	--	-	-	-	-
Unigene0062711	5.333333333	18.66666667	0.2648	0.6016	0.549	1.2151	1.2321	2.6545	0.4718	1.700566667	1.849768241	0.0123918	1	no	-	--	-	-	-	-
Unigene0069293	7.333333333	20.66666667	0.3691	0.3594	0.2869	1.097	1.0196	1.009	0.338466667	1.041866667	1.622084995	0.012391892	1	no	-	--	-	-	-	-
Unigene0044258	9.666666667	26.33333333	0.9094	1.1066	1.296	2.7024	3.1729	3.7285	1.104	3.201266667	1.535902687	0.012443098	1	no	-	--	-	-	-	-
Unigene0068848	2.333333333	14.33333333	0.1976	0.1924	0.0683	2.7205	0.613	0.1201	0.152766667	1.1512	2.913736807	0.012455302	1	no	-	--	-	-	-	-
Unigene0066181	19	4.666666667	0.9382	1.8267	1.3464	0.5418	0.1679	0.3945	1.370433333	0.368066667	-1.896593142	0.012458119	1	no	MT-CO1	cytochrome oxidase subunit 1, partial (mitochondrion) [Mus musculus domesticus]	ko01100//Metabolic pathways//Global and Overview//Metabolism;ko04260//Cardiac muscle contraction//Circulatory system//Organismal Systems;ko00190//Oxidative phosphorylation//Energy metabolism//Metabolism	-	-	-
Unigene0071518	13.33333333	2.666666667	0.9218	0.5982	0.9554	0	0.1429	0.3359	0.825133333	0.1596	-2.370166612	0.012502316	1	no	Grm3	PREDICTED: LOW QUALITY PROTEIN: metabotropic glutamate receptor 3-like [Cyprinus carpio]	ko04080//Neuroactive ligand-receptor interaction//Signaling molecules and interaction//Environmental Information Processing	GO:0031224//intrinsic component of membrane;GO:0044425//membrane part;GO:0016020//membrane	GO:0060089//molecular transducer activity	GO:0007154//cell communication;GO:0065007//biological regulation;GO:0007166//cell surface receptor signaling pathway;GO:0050896//response to stimulus;GO:0051716//cellular response to stimulus;GO:0009987//cellular process;GO:0044763//single-organism cellular process;GO:0023052//signaling;GO:0044699//single-organism process;GO:0050789//regulation of biological process;GO:0044700//single organism si…
Unigene0031020	64	18	1.1046	0.6965	0.6115	0.0628	0.4964	0.183	0.8042	0.2474	-1.700708836	0.01258753	1	no	Ggt1	PREDICTED: gamma-glutamyltranspeptidase 1-like [Sinocyclocheilus grahami]	ko01100//Metabolic pathways//Global and Overview//Metabolism;ko00480//Glutathione metabolism//Metabolism of other amino acids//Metabolism;ko00590//Arachidonic acid metabolism//Lipid metabolism//Metabolism;ko00430//Taurine and hypotaurine metabolism//Metabolism of other amino acids//Metabolism;ko00460//Cyanoamino acid metabolism//Metabolism of other amino acids//Metabolism	-	GO:0016740//transferase activity;GO:0016746//transferase activity, transferring acyl groups;GO:0016755//transferase activity, transferring amino-acyl groups;GO:0003824//catalytic activity	GO:0044237//cellular metabolic process;GO:0008152//metabolic process;GO:0006790//sulfur compound metabolic process;GO:0009987//cellular process
Unigene0038205	349.6666667	142.3333333	2.4119	1.7848	2.6683	0.6833	0.5066	1.6348	2.288333333	0.941566667	-1.281162068	0.012604337	1	no	Lrrc16b	leucine-rich repeat-containing protein 16B [Danio rerio]	-	-	-	-
Unigene0062723	10.33333333	1.666666667	0.2059	0.5213	0.555	0	0.0479	0.1501	0.4274	0.066	-2.695048978	0.012605976	1	no	-	--	-	-	-	-
Unigene0056655	215.3333333	454.3333333	9.6363	4.3411	5.4282	17.1506	9.3976	17.3147	6.468533333	14.62096667	1.176528159	0.012624306	1	no	WFDC3	PREDICTED: WAP four-disulfide core domain protein 3-like, partial [Sinocyclocheilus grahami]	-	-	-	-
Unigene0035162	441.6666667	929.6666667	16.4885	19.8557	40.6706	98.4147	40.4249	42.6619	25.6716	60.5005	1.23677385	0.012657351	1	no	-	--	-	-	-	-
Unigene0023432	17	45	1.5098	0.6125	1.1085	5.038	1.9755	2.5221	1.076933333	3.178533333	1.561432274	0.012719961	1	no	-	--	-	-	-	-
Unigene0060685	6.333333333	0.333333333	0.1118	0.7616	1.2741	0	0.13	0	0.715833333	0.043333333	-4.046074603	0.012783013	1	no	-	--	-	-	-	-
Unigene0056754	3	12.33333333	0.4974	0.6053	0	1.0891	2.0246	1.8127	0.367566667	1.642133333	2.159493427	0.012783127	1	no	-	hypothetical protein cypCar_00040400 [Cyprinus carpio]	-	-	-	-
Unigene0062210	2.666666667	14	0.1576	0.307	0.1634	3.0576	0.4584	0.4309	0.209333333	1.315633333	2.651883503	0.012787291	1	no	-	--	-	-	-	-
Unigene0044925	6.666666667	0	1.1487	0	0.1323	0	0	0	0.427	0.001	-8.73809226	0.012811481	1	no	Gimap5	PREDICTED: myb-like protein X [Danio rerio]	-	-	GO:0097367//carbohydrate derivative binding;GO:0036094//small molecule binding;GO:0001882//nucleoside binding;GO:0032550//purine ribonucleoside binding;GO:0001883//purine nucleoside binding;GO:0032549//ribonucleoside binding;GO:0005488//binding;GO:1901363//heterocyclic compound binding;GO:0097159//organic cyclic compound binding	-
Unigene0019476	9	26.33333333	0.562	1.0943	0.2184	2.3734	2.5329	1.3442	0.6249	2.0835	1.737311855	0.012821845	1	no	-	--	-	-	-	-
Unigene0051334	64.66666667	133	3.7553	2.742	3.1241	8.0996	8.6777	5.2675	3.207133333	7.348266667	1.196119649	0.012844943	1	no	-	--	-	-	-	-
Unigene0048243	3.333333333	12.33333333	0.3653	0.4446	0.0947	1.4856	0.8497	1.3314	0.301533333	1.222233333	2.019130332	0.01284902	1	no	-	--	-	-	-	-
Unigene0016571	6	0	0.4582	0	0.095	0	0	0	0.1844	0.001	-7.526694846	0.012921691	1	no	Endog	PREDICTED: endonuclease G, mitochondrial-like [Sinocyclocheilus rhinocerous]	ko04210//Apoptosis//Cell growth and death//Cellular Processes	-	-	-
Unigene0055960	1269.333333	129	1.4675	252.2661	5.722	20.8111	5.2829	5.3484	86.4852	10.4808	-3.044704427	0.012933287	1	no	IGKV4-1	PREDICTED: Ig kappa chain V-III region NG9 [Danio rerio]	-	GO:0016020//membrane;GO:0044425//membrane part;GO:0031224//intrinsic component of membrane	-	-
Unigene0065781	7	0.666666667	0.6949	0.1503	0.8003	0.0966	0.0898	0	0.5485	0.062133333	-3.142052261	0.012941818	1	no	-	--	-	-	-	-
Unigene0060047	31	79	0.3613	0.6684	0.6554	2.7353	1.723	0.5597	0.5617	1.672666667	1.574278262	0.012967602	1	no	-	--	-	-	-	-
Unigene0002271	91.66666667	34.33333333	2.7318	1.3931	3.1011	0.9441	1.0288	0.9482	2.408666667	0.9737	-1.306685507	0.013000718	1	no	-	--	-	-	-	-
Unigene0063460	2.666666667	12	0.2415	0	0.4172	1.511	1.1235	0.6601	0.219566667	1.0982	2.322409862	0.013012125	1	no	-	--	-	-	-	-
Unigene0029174	34	75.66666667	0.8731	0.6955	1.1518	2.6817	1.9694	1.9768	0.9068	2.2093	1.284733039	0.013021181	1	no	-	PREDICTED: uncharacterized protein LOC107572485 [Sinocyclocheilus grahami]	-	-	-	-
Unigene0020920	1.333333333	8.666666667	0	0	0.1852	0.503	0.3636	0.4069	0.061733333	0.4245	2.781642956	0.013042442	1	no	TCF24	PREDICTED: transcription factor 24-like [Sinocyclocheilus rhinocerous]	-	-	-	-
Unigene0016484	5.666666667	0.333333333	0.9809	0.191	0.5084	0.1227	0	0	0.5601	0.0409	-3.77551168	0.013065588	1	no	-	--	-	-	-	-
Unigene0006945	9.333333333	26.33333333	0.4935	0.3737	0.682	2.6073	1.2117	1.0992	0.5164	1.6394	1.666606997	0.013072887	1	no	-	--	-	-	-	-
Unigene0072068	10.66666667	2.333333333	0.9133	1.1855	1.1569	0.127	0.236	0.3698	1.085233333	0.244266667	-2.151476358	0.013080811	1	no	-	--	-	-	-	-
Unigene0009837	59	121.6666667	0.7694	0.6729	0.8785	2.0233	1.5621	1.6397	0.7736	1.7417	1.170836448	0.01308663	1	no	WNT7B	PREDICTED: protein Wnt-7b-like [Sinocyclocheilus anshuiensis]	ko04310//Wnt signaling pathway//Signal transduction//Environmental Information Processing;ko04916//Melanogenesis//Endocrine system//Organismal Systems;ko04340//Hedgehog signaling pathway//Signal transduction//Environmental Information Processing	-	-	-
Unigene0024088	0.333333333	4.666666667	0	0.1111	0	0.4285	0.3983	0.8321	0.037033333	0.552966667	3.9002962	0.013190691	1	no	-	--	-	-	-	-
Unigene0058151	21.66666667	5.333333333	1.3784	0.3834	1.4797	0.1232	0.229	0.4485	1.0805	0.2669	-2.017327862	0.013246688	1	no	-	--	-	-	-	-
Unigene0019998	1	7.333333333	0.0974	0.1896	0	1.3402	0.906	0.2662	0.095666667	0.837466667	3.129943532	0.013272865	1	no	CLEC4E	immune-related, lectin-like receptor 4 [Danio rerio]	-	-	-	-
Unigene0063229	0.333333333	5	0	0.1107	0	1.1379	0.661	0.2071	0.0369	0.668666667	4.179594479	0.01327837	1	no	TRIM29	PREDICTED: E3 ubiquitin-protein ligase TRIM39-like [Cyprinus carpio]	-	-	-	-
Unigene0049565	1	7.666666667	0.1249	0.2432	0	1.5632	0.2906	1.2521	0.1227	1.0353	3.076841725	0.013280879	1	no	-	--	-	-	-	-
Unigene0069751	1.666666667	10	0.1865	0.0908	0.1933	1.517	0.2169	1.2745	0.156866667	1.0028	2.676423176	0.013282448	1	no	-	--	-	-	-	-
Unigene0067381	2	9.666666667	0.1878	0.0914	0.292	1.6453	0.5462	0.8557	0.1904	1.015733333	2.415416309	0.013393828	1	no	-	--	-	-	-	-
Unigene0034806	59.66666667	131.3333333	2.0648	2.037	0.799	3.8583	4.7389	3.3613	1.6336	3.986166667	1.286947261	0.013429012	1	no	-	--	-	-	-	-
Unigene0018339	1.333333333	7.666666667	0	0.2252	0.2397	0.8683	1.3451	0.7376	0.154966667	0.983666667	2.66621159	0.013435905	1	no	-	PREDICTED: LOW QUALITY PROTEIN: golgin subfamily B member 1-like [Cyprinus carpio]	-	-	-	-
Unigene0059319	2	12.66666667	0.2354	0.1146	0.366	1.3256	0.2738	2.8958	0.238666667	1.4984	2.650353813	0.013438812	1	no	-	PREDICTED: transcription factor Sp3-like isoform X1 [Cyprinus carpio]	-	-	-	-
Unigene0070039	0	5.333333333	0	0	0	0.4582	0	1.4457	0.001	0.634633333	9.309779489	0.013462466	1	no	-	--	-	-	-	-
Unigene0023758	2	10	0.2499	0.0608	0.0647	0.8598	0.3632	0.7968	0.125133333	0.673266667	2.42771189	0.013491314	1	no	TMEM132D	PREDICTED: transmembrane protein 132D-like [Sinocyclocheilus anshuiensis]	-	-	-	-
Unigene0061442	0	9	0	0	0	0	0	2.9482	0.001	0.982733333	9.940656181	0.013518367	1	no	-	--	-	-	-	-
Unigene0027563	0	9	0	0	0	0	0	2.5254	0.001	0.8418	9.717333699	0.013519319	1	no	ORF2	--	-	-	-	-
Unigene0016284	13	42.66666667	0.2329	0.9718	0.069	1.707	1.277	1.6371	0.424566667	1.540366667	1.859210796	0.013570213	1	no	-	PREDICTED: extracellular matrix-binding protein ebh-like, partial [Sinocyclocheilus anshuiensis]	-	-	-	-
Unigene0033906	13	32.66666667	0.5248	0.4769	0.3626	1.4885	0.9359	1.307	0.454766667	1.2438	1.451556105	0.013586043	1	no	-	--	-	-	-	-
Unigene0012080	11.33333333	31.66666667	0.341	1.0513	0.5302	2.7024	1.1898	2.0196	0.640833333	1.9706	1.620613865	0.013615629	1	no	-	--	-	-	-	-
Unigene0067025	1	7.333333333	0.2102	0.1023	0	1.7096	0.4889	0.4788	0.104166667	0.892433333	3.098850712	0.013626062	1	no	-	--	-	-	-	-
Unigene0027842	5	0	0.5772	0.3746	0	0	0	0	0.317266667	0.001	-8.309552144	0.013647022	1	no	-	--	-	-	-	-
Unigene0015140	5	19.66666667	0.3191	0	0.4961	1.7302	1.0515	0.7753	0.271733333	1.185666667	2.125435018	0.013656455	1	no	IQSEC3	PREDICTED: IQ motif and SEC7 domain-containing protein 3-like [Cyprinus carpio]	ko04144//Endocytosis//Transport and catabolism//Cellular Processes	-	-	GO:0007154//cell communication;GO:0044763//single-organism cellular process;GO:0009987//cellular process;GO:0051716//cellular response to stimulus;GO:0023052//signaling;GO:0044700//single organism signaling;GO:0044699//single-organism process;GO:0050794//regulation of cellular process;GO:0050896//response to stimulus;GO:0007265//Ras protein signal transduction;GO:0065007//biological regulation;GO…
Unigene0015893	0.333333333	7.333333333	0.091	0	0	0	1.6936	0.4976	0.030333333	0.7304	4.589710816	0.01366174	1	no	BCO2	PREDICTED: beta,beta-carotene 9',10'-oxygenase-like [Cyprinus carpio]	-	GO:0044464//cell part;GO:0044424//intracellular part;GO:0005623//cell;GO:0043229//intracellular organelle;GO:0043227//membrane-bounded organelle;GO:0005622//intracellular;GO:0043231//intracellular membrane-bounded organelle;GO:0043226//organelle	GO:0016701//oxidoreductase activity, acting on single donors with incorporation of molecular oxygen;GO:0016491//oxidoreductase activity;GO:0010436//carotenoid dioxygenase activity;GO:0051213//dioxygenase activity;GO:0016702//oxidoreductase activity, acting on single donors with incorporation of molecular oxygen, incorporation of two atoms of oxygen;GO:0003824//catalytic activity	GO:0044699//single-organism process;GO:0044710//single-organism metabolic process;GO:0008152//metabolic process
Unigene0037390	1.333333333	8.333333333	0.0309	0.0301	0	0.1354	0.0719	0.1972	0.020333333	0.134833333	2.729258555	0.013689516	1	no	zgc:158412	PREDICTED: uncharacterized protein C11orf53 homolog [Cyprinus carpio]	-	-	-	-
Unigene0054484	3.666666667	14.66666667	0.4729	0.1151	0.0613	0.5918	1.5127	0.7541	0.216433333	0.952866667	2.138351645	0.013704307	1	no	-	PREDICTED: H-2 class I histocompatibility antigen, D-K alpha chain-like [Sinocyclocheilus anshuiensis]	-	-	-	-
Unigene0004573	20	74.33333333	2.2822	0.7016	0.6225	2.4047	12.0838	0.985	1.2021	5.157833333	2.10120824	0.013707916	1	no	-	--	-	-	-	-
Unigene0048503	0	3.333333333	0	0	0	0.832	0.1289	0.3029	0.001	0.421266667	8.718589955	0.013723849	1	no	-	--	-	-	-	-
Unigene0058452	3	11.66666667	0.2422	0.3144	0.1674	0.9093	0.5635	1.4714	0.241333333	0.9814	2.023814075	0.013766652	1	no	-	--	-	-	-	-
Unigene0057288	22	5	3.2512	0.6948	1.315	0.3969	0.6456	0.289	1.753666667	0.443833333	-1.982284622	0.01376847	1	no	-	--	-	-	-	-
Unigene0064202	0	3.666666667	0	0	0	0.0425	0.0791	0.2478	0.001	0.123133333	6.944077555	0.013797185	1	no	-	--	-	-	-	-
Unigene0008517	52	12	2.31	0.3877	3.6326	0.598	0.0926	0.7983	2.1101	0.4963	-2.088027012	0.013818956	1	no	-	PREDICTED: uncharacterized protein LOC109615401 [Esox lucius]	-	-	-	-
Unigene0043314	7.666666667	26.33333333	0.654	0.2729	0.1452	1.4612	2.3904	0.4256	0.357366667	1.425733333	1.996227189	0.013821185	1	no	Mr1	PREDICTED: major histocompatibility complex class I-related gene protein-like [Sinocyclocheilus rhinocerous]	ko04144//Endocytosis//Transport and catabolism//Cellular Processes;ko04514//Cell adhesion molecules (CAMs)//Signaling molecules and interaction//Environmental Information Processing;ko04145//Phagosome//Transport and catabolism//Cellular Processes	-	-	GO:0002376//immune system process
Unigene0061978	3	13.66666667	0.3579	0.2788	0	0.4478	1.998	0.7826	0.212233333	1.076133333	2.342133671	0.013845844	1	no	-	PREDICTED: uncharacterized protein LOC107573211 [Sinocyclocheilus grahami]	-	-	-	-
Unigene0056042	32	80.33333333	0.7264	1.5503	0.3764	3.8804	2.177	1.6037	0.884366667	2.5537	1.529872499	0.01385883	1	no	-	--	-	-	-	-
Unigene0060397	0	3.333333333	0	0	0	0.1171	0.4354	0.4264	0.001	0.3263	8.350055177	0.013868745	1	no	-	--	-	-	-	-
Unigene0058663	0.666666667	6.333333333	0	0	0.17	0.513	0.2861	0.8218	0.056666667	0.5403	3.253188436	0.013893444	1	no	-	PREDICTED: chondroitin sulfate proteoglycan 5-like [Sinocyclocheilus grahami]	-	-	-	-
Unigene0072537	4.333333333	15.66666667	0.5369	0.3484	0.2782	2.911	1.561	0.4892	0.387833333	1.653733333	2.092217907	0.013906616	1	notest	-	--	-	-	-	-
Unigene0070771	0.666666667	9.333333333	0	0	0.259	2.3448	0	1.4798	0.086333333	1.274866667	3.884284867	0.013909411	1	no	-	--	-	-	-	-
Unigene0040248	22	52	0.1746	0.1619	0.2155	0.4058	0.3965	0.5758	0.184	0.459366667	1.319940407	0.013952099	1	no	klhl31	PREDICTED: kelch-like protein 31 isoform X1 [Cyprinus carpio]	-	-	-	-
Unigene0046432	2.333333333	14.66666667	0.1182	0	0.7353	4.4384	0.5501	1.0773	0.2845	2.021933333	2.829234872	0.013960844	1	no	-	--	-	-	-	-
Unigene0000276	27	83	1.2673	0.6043	0.2145	5.0164	1.0228	1.414	0.695366667	2.4844	1.837051657	0.013963805	1	no	-	PREDICTED: uncharacterized protein LOC109202850 [Oreochromis niloticus]	-	-	-	-
Unigene0004444	6.666666667	1	0.8613	0.6289	0.6695	0.1347	0.1252	0.0981	0.7199	0.119333333	-2.592799432	0.013971741	1	no	-	--	-	-	-	-
Unigene0072116	1.333333333	8.666666667	0.2408	0	0.0832	1.5064	0.5601	0.3656	0.108	0.8107	2.908136831	0.013974603	1	no	-	--	-	-	-	-
Unigene0025430	7.666666667	1	0.8408	0.4093	1.1983	0.263	0	0.0958	0.816133333	0.1196	-2.770587478	0.013976487	1	no	KCNJ10	PREDICTED: ATP-sensitive inward rectifier potassium channel 10-like [Danio rerio]	-	-	-	-
Unigene0032341	489.6666667	964.6666667	8.8017	5.0478	9.8691	15.2986	12.4515	21.3028	7.9062	16.35096667	1.048319574	0.013982656	1	no	si:ch211-233f10.4	LOC794225 protein, partial [Danio rerio]	-	-	-	-
Unigene0063840	1.666666667	10	0.2657	0.1725	0	0.3325	1.2362	1.2106	0.146066667	0.926433333	2.665060179	0.014009304	1	no	-	--	-	-	-	-
Unigene0064520	9.333333333	0	0	2.464	0	0	0	0	0.821333333	0.001	-9.68182404	0.014012037	1	no	-	--	-	-	-	-
Unigene0042823	2.333333333	11.33333333	0.2588	0.168	0.1788	1.8351	1.4047	0.2358	0.201866667	1.158533333	2.520824944	0.014017698	1	no	-	--	-	-	-	-
Unigene0054196	1	6.666666667	0	0.1848	0.0984	1.069	0.552	0.519	0.0944	0.713333333	2.917717626	0.014072281	1	no	-	--	-	-	-	-
Unigene0009221	24	5.333333333	0.6948	0.6764	1.6098	0.4091	0.3327	0.0372	0.993666667	0.259666667	-1.936101142	0.014107345	1	no	-	--	-	-	-	-
Unigene0065138	4.666666667	19.33333333	0	0.306	0.8146	2.6552	1.3711	1.1457	0.373533333	1.724	2.206450877	0.014118241	1	no	-	--	-	-	-	-
Unigene0041133	42.33333333	112.6666667	0.1594	0.7617	0.9311	2.9007	1.584	1.1089	0.6174	1.864533333	1.594537201	0.014123807	1	no	-	PREDICTED: RNA-directed DNA polymerase from mobile element jockey-like [Sinocyclocheilus grahami]	-	-	-	-
Unigene0021454	1.666666667	9	0.0395	0.0384	0.1227	0.5927	0.1836	0.3956	0.066866667	0.390633333	2.546455957	0.014124384	1	no	-	--	-	-	-	-
Unigene0065944	16.66666667	1.333333333	0	0.1419	2.3673	0.0608	0.113	0.0443	0.8364	0.0727	-3.524165793	0.014125844	1	no	-	--	-	-	-	-
Unigene0014658	0	4.333333333	0	0	0	1.0914	0.0922	0.0722	0.001	0.4186	8.709428501	0.014157449	1	no	-	--	-	-	-	-
Unigene0010319	37	87.66666667	1.4797	0.586	0.7279	2.4793	1.7793	2.8108	0.9312	2.356466667	1.339462311	0.014191737	1	no	cyp2k4	PREDICTED: cytochrome P450 2K1-like [Sinocyclocheilus grahami]	-	-	GO:0046914//transition metal ion binding;GO:0005488//binding;GO:0016491//oxidoreductase activity;GO:0046872//metal ion binding;GO:0043169//cation binding;GO:0043167//ion binding;GO:0046906//tetrapyrrole binding;GO:0097159//organic cyclic compound binding;GO:0004497//monooxygenase activity;GO:0003824//catalytic activity;GO:1901363//heterocyclic compound binding	GO:0044710//single-organism metabolic process;GO:0044699//single-organism process;GO:0008152//metabolic process
Unigene0073295	29.66666667	68	1.1834	2.4139	1.4018	3.7371	3.9323	4.6723	1.666366667	4.1139	1.30380084	0.0141924	1	notest	-	--	-	-	-	-
Unigene0029616	5	16.33333333	0.5475	0.1333	0.3547	1.1989	1.7511	0.8106	0.345166667	1.253533333	1.860635307	0.014213043	1	no	-	--	-	-	-	-
Unigene0070265	5.666666667	17.33333333	0.2842	0.2213	0.4713	0.9956	0.9254	1.2428	0.3256	1.0546	1.695523297	0.014220697	1	no	Pol	PREDICTED: guanine nucleotide-binding protein G(o) subunit alpha [Latimeria chalumnae]	ko04110//Cell cycle//Cell growth and death//Cellular Processes;ko04350//TGF-beta signaling pathway//Signal transduction//Environmental Information Processing	-	-	-
Unigene0051170	18.33333333	4	1.8702	0.881	0.5628	0.0755	0.0702	0.5497	1.104666667	0.2318	-2.25265863	0.014389368	1	no	-	--	-	-	-	-
Unigene0037544	201	545.6666667	1.9552	2.6848	0.4513	8.2798	1.7179	5.36	1.6971	5.119233333	1.592856189	0.014398407	1	no	AIPL1	PREDICTED: aryl-hydrocarbon-interacting protein-like 1 [Sinocyclocheilus anshuiensis]	-	-	-	-
Unigene0037129	14	35.33333333	0.6816	0.6636	0.7065	1.2184	2.3216	1.9962	0.6839	1.8454	1.432076267	0.014456564	1	no	-	--	-	-	-	-
Unigene0057586	1	11	0.074	0.144	0	2.3143	0	0.5393	0.072666667	0.9512	3.710383081	0.014461795	1	no	-	--	-	-	-	-
Unigene0052723	0	4.333333333	0	0	0	0	0.2412	0.162	0.001	0.1344	7.070389328	0.014497704	1	no	DLC1	PREDICTED: stAR-related lipid transfer protein 13-like isoform X2 [Cyprinus carpio]	-	-	GO:0005488//binding	GO:0044699//single-organism process;GO:0044763//single-organism cellular process;GO:0009987//cellular process;GO:0007154//cell communication
Unigene0024711	3.333333333	13	0.5118	0.4983	0.2652	2.4015	2.9761	0.4663	0.4251	1.947966667	2.196094826	0.014502209	1	no	-	S-antigen protein [Bos mutus]	-	-	-	-
Unigene0008763	45	196.6666667	0.479	0.1555	0.3536	0.2634	4.4825	0.1984	0.329366667	1.6481	2.323037321	0.014519927	1	no	-	PREDICTED: SE-cephalotoxin-like [Cyprinus carpio]	-	-	-	-
Unigene0007221	41	13.33333333	1.4758	1.4368	2.0258	0.2995	0.9278	0.5088	1.646133333	0.5787	-1.508193647	0.014534674	1	no	-	--	-	-	-	-
Unigene0025541	96.33333333	207.6666667	5.2167	4.0044	5.3551	7.783	9.5093	15.3564	4.858733333	10.8829	1.163410888	0.014560645	1	no	-	Nipped-B-like B, partial [Merops nubicus]	-	-	-	-
Unigene0000352	2.333333333	10.66666667	0.2968	0.0722	0.1538	1.4853	0.5177	0.676	0.174266667	0.893	2.357363535	0.014575109	1	no	-	--	-	-	-	-
Unigene0002779	17.33333333	49.33333333	0.4079	0.4236	0.5919	0.5104	2.4035	1.4122	0.474466667	1.442033333	1.603725873	0.014593818	1	no	-	--	-	-	-	-
Unigene0062418	5.333333333	0.333333333	0.4547	0.2213	1.1782	0.1422	0	0	0.618066667	0.0474	-3.704803496	0.01459511	1	no	-	--	-	-	-	-
Unigene0073340	24	3.666666667	1.6288	0.1724	0.7707	0.1772	0.2883	0	0.8573	0.155166667	-2.465981476	0.014612165	1	notest	-	--	-	-	-	-
Unigene0031063	0.333333333	4.333333333	0	0.1121	0	0.4323	0.5357	0.6295	0.037366667	0.5325	3.832957748	0.014613941	1	no	-	--	-	-	-	-
Unigene0009057	120.3333333	14.33333333	21.569	0.2393	0.3822	0.3076	0.5718	1.7357	7.396833333	0.8717	-3.085004154	0.014621268	1	no	-	uncharacterized protein LOC561161 precursor [Danio rerio]	-	-	-	-
Unigene0060529	4.666666667	0.333333333	0.6367	0.4959	0.6599	0	0.1481	0	0.5975	0.049366667	-3.597329573	0.014628329	1	no	LGALS9C	PREDICTED: galectin-9 [Danio rerio]	-	-	GO:0005488//binding	-
Unigene0007782	138.6666667	262.3333333	1.5809	1.6952	1.496	3.0388	3.5839	3.1939	1.5907	3.2722	1.040599155	0.014638866	1	no	CCDC50	PREDICTED: coiled-coil domain-containing protein 50-like isoform X3 [Sinocyclocheilus rhinocerous]	-	-	-	-
Unigene0011874	5.666666667	0.333333333	0.8444	0.1495	0.3183	0	0	0.0699	0.4374	0.0233	-4.23055136	0.014656503	1	no	-	--	-	-	-	-
Unigene0056528	6	0.666666667	0.682	0.664	0.7069	0	0.2644	0	0.6843	0.088133333	-2.956869271	0.014656554	1	no	-	PREDICTED: LIM and calponin homology domains-containing protein 1 isoform X2 [Danio rerio]	-	-	-	-
Unigene0004599	1.333333333	8.666666667	0.2889	0.0938	0	1.6871	0.336	0.7898	0.127566667	0.937633333	2.877772459	0.014661323	1	no	-	--	-	-	-	-
Unigene0066674	1.666666667	9.333333333	0.1127	0.1097	0.3504	1.6923	0.3932	1.3349	0.190933333	1.140133333	2.578061654	0.014706576	1	no	-	--	-	-	-	-
Unigene0065578	7.333333333	0.666666667	1.1191	0.3632	0.1547	0.0934	0.0868	0	0.545666667	0.060066667	-3.183383406	0.014710633	1	no	-	--	-	-	-	-
Unigene0036687	743	339	51.5967	76.112	92.1138	23.321	30.6891	49.8717	73.27416667	34.62726667	-1.081396144	0.014728178	1	no	UBB	ubiquitin B, isoform CRA_e [Homo sapiens]	-	GO:0043229//intracellular organelle;GO:0044440//endosomal part;GO:0005622//intracellular;GO:0005634//nucleus;GO:0043226//organelle;GO:0044422//organelle part;GO:0043233//organelle lumen;GO:0070013//intracellular organelle lumen;GO:0044446//intracellular organelle part;GO:0012505//endomembrane system;GO:0016023//cytoplasmic, membrane-bounded vesicle;GO:0031974//membrane-enclosed lumen;GO:0005623//…	GO:0005488//binding	GO:1902578//single-organism localization;GO:0002768//immune response-regulating cell surface receptor signaling pathway;GO:0044772//mitotic cell cycle phase transition;GO:0010562//positive regulation of phosphorus metabolic process;GO:0072331//signal transduction by p53 class mediator;GO:1903508//positive regulation of nucleic acid-templated transcription;GO:0005977//glycogen metabolic process;GO…
Unigene0043160	85.66666667	252	0.6612	1.8239	7.1579	14.5248	9.5699	7.2294	3.214333333	10.44136667	1.699719106	0.014736393	1	no	-	--	-	-	-	-
Unigene0069284	0.333333333	4	0.0726	0	0	0.3632	0.3376	0.2645	0.0242	0.321766667	3.732935926	0.014765661	1	no	-	--	-	-	-	-
Unigene0065445	1	7	0	0.2724	0	0.8168	0.8677	0.5098	0.0908	0.731433333	3.009962173	0.0147809	1	no	-	--	-	-	-	-
Unigene0040319	5	18.66666667	0.7906	0.1539	0.2458	3.2646	0.8275	1.0085	0.396766667	1.7002	2.099341734	0.014799614	1	no	-	PREDICTED: probable ubiquitin-conjugating enzyme E2 W-B [Sinocyclocheilus grahami]	-	-	-	-
Unigene0071011	7.333333333	21.66666667	0.4837	0.157	0.2507	1.4124	0.797	0.7346	0.297133333	0.981333333	1.723632805	0.014869307	1	no	-	--	-	-	-	-
Unigene0009528	37.33333333	11.66666667	0.6525	0.3754	0.6455	0.1113	0.069	0.3378	0.5578	0.1727	-1.691479851	0.014869808	1	no	CNTN4	PREDICTED: contactin-3-like [Sinocyclocheilus grahami]	-	-	-	-
Unigene0049675	2	9.666666667	0.2277	0.0739	0.1573	0.9496	1.2357	0.3457	0.152966667	0.843666667	2.463455796	0.014873842	1	no	-	--	-	-	-	-
Unigene0018070	7.666666667	27.33333333	0.1944	0.1892	0.7555	0.6081	1.413	2.0811	0.3797	1.3674	1.848503426	0.014876253	1	no	-	--	-	-	-	-
Unigene0014115	1	7.333333333	0.096	0.0934	0.0995	0.8405	0.2232	1.1366	0.0963	0.733433333	2.929058132	0.014901663	1	no	-	--	-	-	-	-
Unigene0007043	8.666666667	27	0.5794	0.8863	0.6863	4.9711	0.9626	1.7344	0.717333333	2.556033333	1.833191073	0.014940371	1	no	-	--	-	-	-	-
Unigene0015804	1	7.666666667	0	0.3423	0	1.4664	0.4089	1.0678	0.1141	0.981033333	3.104003365	0.014966318	1	no	-	--	-	-	-	-
Unigene0030687	4	0	0.7999	0.0865	0.1842	0	0	0	0.356866667	0.001	-8.479241342	0.01501556	1	no	QRFPR	PREDICTED: pyroglutamylated RFamide peptide receptor-like [Sinocyclocheilus rhinocerous]	-	-	-	-
Unigene0047124	2504.666667	4457	37.6227	28.7549	19.7234	46.2444	50.7738	66.291	28.70033333	54.4364	0.923504169	0.015038316	1	no	Tmem27	PREDICTED: collectrin-like [Sinocyclocheilus grahami]	-	-	GO:0016787//hydrolase activity;GO:0070011//peptidase activity, acting on L-amino acid peptides;GO:0008233//peptidase activity;GO:0008238//exopeptidase activity;GO:0003824//catalytic activity	-
Unigene0059695	3	11.66666667	0.077	0.2998	0.3192	1.3487	0.8059	0.8418	0.232	0.9988	2.106071016	0.015038343	1	no	-	--	-	-	-	-
Unigene0053652	4.333333333	14.33333333	0.1969	0.1917	0.2551	1.3552	0.5725	0.4934	0.214566667	0.807033333	1.911202295	0.015041981	1	no	-	--	-	-	-	-
Unigene0069600	0	4	0	0	0	0.1428	0.2655	0.9361	0.001	0.448133333	8.807784232	0.015062233	1	no	MTF2	PREDICTED: PHD finger protein 1-like [Sinocyclocheilus rhinocerous]	-	-	-	-
Unigene0059353	33.33333333	96	0.9569	0.5273	0.3181	3.4789	0.5039	1.8094	0.600766667	1.930733333	1.684272245	0.015065313	1	no	ERVPABLB-1	PREDICTED: endogenous retrovirus group PABLB member 1 Env polyprotein-like [Poecilia reticulata]	-	-	-	-
Unigene0061394	0	8.666666667	0	0	0	0	0	2.8519	0.001	0.950633333	9.892745179	0.015074087	1	no	-	--	-	-	-	-
Unigene0069778	3.333333333	0	0.7426	0.241	0.2566	0	0	0	0.4134	0.001	-8.691394579	0.01513455	1	no	-	--	-	-	-	-
Unigene0062326	3.333333333	0	0.492	0.1597	0.17	0	0	0	0.2739	0.001	-8.097505456	0.015137161	1	no	-	--	-	-	-	-
Unigene0001911	35	77.33333333	0.8687	0.8251	0.5271	2.4656	1.3307	1.6409	0.7403	1.8124	1.291719462	0.015174597	1	no	-	--	-	-	-	-
Unigene0059092	614.6666667	1284.666667	2.6467	2.0521	2.0783	6.7932	1.9271	6.4161	2.259033333	5.045466667	1.159282155	0.015177717	1	no	-	PREDICTED: uncharacterized protein LOC109202258 [Oreochromis niloticus]	-	-	-	-
Unigene0061954	1.666666667	10.66666667	0.0646	0	0.2678	0.8083	0.2254	1.1183	0.1108	0.717333333	2.694685791	0.015198277	1	no	TTN	PREDICTED: titin-like [Sinocyclocheilus anshuiensis]	-	-	-	GO:0048869//cellular developmental process;GO:0006996//organelle organization;GO:0032989//cellular component morphogenesis;GO:0009987//cellular process;GO:0022607//cellular component assembly;GO:0009653//anatomical structure morphogenesis;GO:0044763//single-organism cellular process;GO:0044085//cellular component biogenesis;GO:0044699//single-organism process;GO:0016043//cellular component organi…
Unigene0047098	13.66666667	0.666666667	5.2706	0	0.1366	0.1649	0	0.1201	1.8024	0.095	-4.245847895	0.015215458	1	no	-	--	-	-	-	-
Unigene0033441	5.333333333	16.33333333	0.2149	0.4184	0.2227	1.4117	0.6873	0.8321	0.285333333	0.977033333	1.775759487	0.015222277	1	no	-	PREDICTED: uncharacterized protein LOC106097413 [Oreochromis niloticus]	-	-	-	-
Unigene0067279	0.666666667	5.666666667	0	0.2213	0	0.9956	0.3966	0.725	0.073766667	0.705733333	3.258082203	0.015230374	1	no	-	--	-	-	-	-
Unigene0066400	0.666666667	5.666666667	0	0.2467	0	1.11	0.4422	0.8082	0.082233333	0.7868	3.258201743	0.015232617	1	no	-	--	-	-	-	-
Unigene0009353	30.33333333	78.66666667	0.9334	0.3408	1.4209	2.2994	3.9691	1.4883	0.898366667	2.5856	1.5251228	0.01523285	1	no	-	--	-	-	-	-
Unigene0006582	9141.333333	14673.33333	151.1677	179.724	149.8738	345.6287	297.071	218.1567	160.2551667	286.9521333	0.84043923	0.015234736	1	no	-	PREDICTED: G protein-activated inward rectifier potassium channel 1-like [Sinocyclocheilus grahami]	-	-	-	-
Unigene0067950	6	0.333333333	0.7416	0.1031	1.098	0.1326	0	0	0.647566667	0.0442	-3.87291045	0.015247613	1	no	-	--	-	-	-	-
Unigene0027984	2.333333333	11	0.2171	0	0.5625	1.9015	0.8837	1.1868	0.259866667	1.324	2.349059627	0.015250007	1	no	-	--	-	-	-	-
Unigene0051306	17.66666667	45	1.8599	1.014	1.0795	3.1651	2.4227	4.9483	1.3178	3.512033333	1.414175106	0.01525679	1	no	-	--	-	-	-	-
Unigene0070902	1.666666667	12.66666667	0	0.4492	0	0.2309	2.0392	1.4294	0.149733333	1.233166667	3.041900466	0.015262959	1	no	-	--	-	-	-	-
Unigene0031269	12	34	0.3977	1.7809	0.6595	2.6871	2.4976	3.4784	0.946033333	2.8877	1.609957947	0.015289075	1	no	-	--	-	-	-	-
Unigene0002446	44	16	2.3054	2.2444	2.5562	0.7379	1.06	0.977	2.368666667	0.924966667	-1.356601907	0.015315287	1	no	-	--	-	-	-	-
Unigene0055952	6.666666667	23.33333333	0.8466	0.2943	0.0627	2.1942	0.9846	1.4876	0.4012	1.555466667	1.954953967	0.015319633	1	no	-	--	-	-	-	-
Unigene0022095	0	3	0	0	0	0.3655	0.3397	0.2662	0.001	0.3238	8.338959175	0.015330692	1	no	Dclk1	PREDICTED: serine/threonine-protein kinase DCLK1-like [Cyprinus carpio]	-	-	-	-
Unigene0068332	1.666666667	8.666666667	0.203	0.2964	0	1.1428	0.5901	1.1095	0.166466667	0.947466667	2.508841867	0.015330979	1	no	-	--	-	-	-	-
Unigene0032444	1.333333333	7.666666667	0.1215	0.3548	0	0.9121	1.413	0.7749	0.158766667	1.033333333	2.702325762	0.015403175	1	no	-	PREDICTED: 5'-AMP-activated protein kinase subunit gamma-1-like isoform X2 [Sinocyclocheilus anshuiensis]	ko04068//FoxO signaling pathway//Signal transduction//Environmental Information Processing;ko04910//Insulin signaling pathway//Endocrine system//Organismal Systems;ko04920//Adipocytokine signaling pathway//Endocrine system//Organismal Systems	-	GO:0005488//binding;GO:1901265//nucleoside phosphate binding;GO:1901363//heterocyclic compound binding;GO:0000166//nucleotide binding;GO:0017076//purine nucleotide binding;GO:0036094//small molecule binding;GO:0097159//organic cyclic compound binding	-
Unigene0057557	10	34	0.7016	0.8538	1.0908	4.2797	0.612	4.5546	0.882066667	3.148766667	1.835827249	0.015427391	1	no	-	--	-	-	-	-
Unigene0065940	0.333333333	4.666666667	0	0	0.08	0.6763	0.449	0.1407	0.026666667	0.422	3.984133595	0.015444176	1	no	Csmd3	PREDICTED: CUB and sushi domain-containing protein 3-like [Cyprinus carpio]	-	-	-	-
Unigene0044892	1.666666667	9	0	0.0826	0.3519	1.2746	0.7898	0.5414	0.144833333	0.8686	2.584298276	0.015452445	1	no	-	--	-	-	-	-
Unigene0057655	87	181.6666667	1.768	1.9384	0.7472	3.5868	3.9128	2.8464	1.484533333	3.448666667	1.216029203	0.015467016	1	no	-	--	-	-	-	-
Unigene0051633	105.3333333	211.3333333	1.9416	2.2133	1.0664	3.6546	4.439	3.4474	1.740433333	3.847	1.144287276	0.0154876	1	no	-	LOC100005456 protein, partial [Danio rerio]	-	-	-	-
Unigene0042005	1	7.666666667	0	0.1228	0.2614	0.3156	1.0268	1.6088	0.128066667	0.983733333	2.94137227	0.015491231	1	no	-	--	-	-	-	-
Unigene0056667	6	18.33333333	0.329	0.4271	0.2273	0.8234	1.7857	0.7494	0.3278	1.1195	1.771966769	0.015509934	1	no	-	--	-	-	-	-
Unigene0031897	2224.333333	1063	13.3324	11.4675	23.7095	8.4313	6.7829	9.4416	16.1698	8.2186	-0.976337271	0.015516695	1	no	-	Coiled-coil domain-containing protein 25 [Larimichthys crocea]	-	-	-	-
Unigene0038856	4	29.66666667	0.547	0	0	3.9928	0.1591	0.6645	0.182333333	1.605466667	3.138342474	0.015522647	1	no	-	--	-	-	-	-
Unigene0006039	1.666666667	8.666666667	0.1027	0.2998	0.1064	1.6699	0.9551	0.4677	0.169633333	1.0309	2.603412799	0.015532326	1	no	-	PREDICTED: glutamate receptor ionotropic, kainate 5-like, partial [Falco cherrug]	-	-	-	-
Unigene0051867	523	184	33.6445	17.6933	27.7106	10.7753	17.4105	3.695	26.34946667	10.62693333	-1.31004843	0.01555313	1	no	-	--	-	-	-	-
Unigene0014848	2.666666667	11.33333333	0	0.0516	0.055	0.199	0.185	0.1208	0.035533333	0.168266667	2.243504472	0.015555511	1	no	Cd34	PREDICTED: hematopoietic progenitor cell antigen CD34 [Esox lucius]	ko04514//Cell adhesion molecules (CAMs)//Signaling molecules and interaction//Environmental Information Processing	-	-	-
Unigene0031443	947.6666667	1704.666667	11.6384	16.4847	12.7787	42.6991	19.6096	20.5793	13.63393333	27.62933333	1.018998918	0.015596825	1	no	Serpine1	PREDICTED: plasminogen activator inhibitor 1 [Sinocyclocheilus rhinocerous]	ko04115//p53 signaling pathway//Cell growth and death//Cellular Processes	GO:0005576//extracellular region;GO:0044421//extracellular region part	GO:0005102//receptor binding;GO:0005515//protein binding;GO:0005125//cytokine activity;GO:0005488//binding	GO:0045861//negative regulation of proteolysis;GO:0048523//negative regulation of cellular process;GO:0050794//regulation of cellular process;GO:0051248//negative regulation of protein metabolic process;GO:0010468//regulation of gene expression;GO:0030162//regulation of proteolysis;GO:0032268//regulation of cellular protein metabolic process;GO:0044092//negative regulation of molecular function;G…
Unigene0065377	4	0	0.2303	0.1121	1.0742	0	0	0	0.4722	0.001	-8.883254231	0.015637314	1	no	-	--	-	-	-	-
Unigene0058855	0	4.333333333	0	0	0	1.0403	0	0.6493	0.001	0.5632	9.137503524	0.015638884	1	no	-	TPA_exp: replicase/helicase/endonuclease [Danio rerio]	-	-	-	-
Unigene0056640	16.66666667	3.333333333	2.1048	1.793	0.4545	0.2195	0	0.6392	1.450766667	0.286233333	-2.341551907	0.015659886	1	no	-	--	-	-	-	-
Unigene0041550	34.33333333	72.33333333	1.1435	1.4365	1.2234	3.0463	3.3034	2.4871	1.2678	2.9456	1.216234359	0.015662917	1	no	ZNF391	PREDICTED: gastrula zinc finger protein XlCGF7.1-like [Sinocyclocheilus rhinocerous]	-	-	-	-
Unigene0013323	25.66666667	5.666666667	1.4214	0.1412	0.6915	0.0363	0.1687	0.2907	0.751366667	0.165233333	-2.185012356	0.015668113	1	no	KIAA1462	PREDICTED: junctional protein associated with coronary artery disease-like [Cyprinus carpio]	-	-	-	-
Unigene0052054	45	15	4.2776	3.8101	4.245	2.5055	0.9527	1.161	4.1109	1.539733333	-1.416773766	0.015725049	1	no	-	PREDICTED: LIM domain-containing protein A-like [Corvus cornix cornix]	-	-	-	-
Unigene0030248	36	94	0.7658	0.174	0.4498	1.8846	1.7369	0.5466	0.4632	1.389366667	1.584720232	0.015738971	1	no	CYP7A1	PREDICTED: cholesterol 7-alpha-monooxygenase-like [Sinocyclocheilus rhinocerous]	ko01100//Metabolic pathways//Global and Overview//Metabolism;ko03320//PPAR signaling pathway//Endocrine system//Organismal Systems;ko00140//Steroid hormone biosynthesis//Lipid metabolism//Metabolism;ko00120//Primary bile acid biosynthesis//Lipid metabolism//Metabolism	-	-	-
Unigene0055494	9.333333333	47	0.9577	0.0717	0	1.2445	1.2852	2.8193	0.343133333	1.783	2.377465516	0.015748811	1	no	KIAA1161	PREDICTED: SITS-binding protein-like [Sinocyclocheilus rhinocerous]	-	-	-	-
Unigene0063856	3.666666667	14	0.3038	0.1479	0.105	1.6475	0.4712	0.3691	0.185566667	0.829266667	2.15989852	0.015768611	1	no	-	--	-	-	-	-
Unigene0066475	2.333333333	9.666666667	0.1553	0.3781	0	0.9719	0.9936	0.5661	0.1778	0.843866667	2.246759743	0.015783592	1	no	-	--	-	-	-	-
Unigene0052790	2.333333333	12.33333333	0.2102	0.307	0.2179	2.8932	0.2445	1.2449	0.245033333	1.460866667	2.575774583	0.015802474	1	no	-	--	-	-	-	-
Unigene0037543	2	13.33333333	0.1962	0.382	0	2.7003	0.1141	1.5194	0.192733333	1.4446	2.905992062	0.015860285	1	no	-	--	-	-	-	-
Unigene0018159	2.333333333	10	0.176	0.257	0.1824	1.2111	1.4327	0.4009	0.205133333	1.0149	2.306703735	0.015860652	1	no	-	--	-	-	-	-
Unigene0012866	1.666666667	11	0.2372	0.077	0.0819	1.6818	0.0919	1.0805	0.132033333	0.9514	2.849149825	0.015871439	1	no	-	PREDICTED: mucin-17-like [Cyprinus carpio]	-	-	-	-
Unigene0014331	7	22	0.1255	0.4481	0.3036	1.8848	0.7786	0.5337	0.2924	1.0657	1.865786153	0.015896658	1	no	-	PREDICTED: uncharacterized protein LOC107753515 isoform X2 [Sinocyclocheilus rhinocerous]	-	-	-	-
Unigene0049066	3.666666667	12.66666667	0.2719	0.2647	0.0564	0.6125	0.6958	0.8919	0.197666667	0.7334	1.891530662	0.015983895	1	no	-	hypothetical protein EH28_24164 [Larimichthys crocea]	-	-	-	-
Unigene0049583	11.33333333	1	2.2947	0	0.991	0	0.2224	0.0871	1.095233333	0.103166667	-3.408189447	0.01598914	1	no	-	--	-	-	-	-
Unigene0003928	1.333333333	8.666666667	0	0.0686	0.219	1.3221	0.6554	0.1925	0.095866667	0.723333333	2.915559462	0.015995816	1	no	PZP	PREDICTED: alpha-2-macroglobulin-like [Sinocyclocheilus anshuiensis]	-	-	-	-
Unigene0066306	24	6.333333333	1.2078	2.2677	2.7719	0.2159	1.1037	0.4716	2.082466667	0.597066667	-1.80232947	0.016026967	1	no	-	PREDICTED: uncharacterized protein LOC109071406 [Cyprinus carpio]	-	-	-	-
Unigene0001654	4	16	0.251	0.9776	0.2602	4.2407	0.7299	1.8299	0.496266667	2.266833333	2.191490862	0.016052898	1	no	-	--	-	-	-	-
Unigene0058877	1.666666667	8.666666667	0.4307	0.1048	0	0.943	1.1269	0.981	0.1785	1.016966667	2.510276413	0.016087048	1	no	-	--	-	-	-	-
Unigene0066210	8	0.666666667	0.1955	0.4757	1.722	0	0.2273	0	0.797733333	0.075766667	-3.396271379	0.016095906	1	no	-	--	-	-	-	-
Unigene0005817	37.66666667	93	0.8563	0.349	1.0733	3.6629	1.5749	1.1612	0.759533333	2.133	1.489698779	0.016135109	1	no	-	--	-	-	-	-
Unigene0008772	5.666666667	16.33333333	0.2308	0.3371	0.4186	1.0108	1.0066	1.0515	0.328833333	1.022966667	1.63733068	0.016150797	1	no	-	PREDICTED: cell wall protein DAN4-like [Sinocyclocheilus anshuiensis]	-	-	-	-
Unigene0064849	17	4.333333333	2.0258	1.2417	0.5444	0.2816	0.349	0.4102	1.270633333	0.346933333	-1.872817405	0.01615679	1	no	-	--	-	-	-	-
Unigene0021077	5.666666667	17	0.2808	0.2278	0.291	1.2296	0.5442	0.8527	0.266533333	0.8755	1.715791207	0.016195384	1	no	-	--	-	-	-	-
Unigene0068416	4.333333333	0	1.0042	0	0.6505	0	0	0	0.551566667	0.001	-9.107391462	0.016200536	1	no	-	--	-	-	-	-
Unigene0066283	6.666666667	0.666666667	0.9249	0.1637	0.61	0	0.0978	0.0766	0.5662	0.058133333	-3.28387421	0.016205808	1	no	-	--	-	-	-	-
Unigene0019165	66.33333333	20.66666667	4.0814	1.9004	2.8969	1.8874	0.6708	0.6063	2.959566667	1.054833333	-1.488370888	0.016259666	1	no	Cplx4	PREDICTED: complexin-4-like [Sinocyclocheilus grahami]	-	GO:0042995//cell projection;GO:0033267//axon part;GO:0044464//cell part;GO:0097458//neuron part;GO:0044463//cell projection part;GO:0030424//axon;GO:0005623//cell;GO:0043005//neuron projection	-	GO:0006810//transport;GO:0044699//single-organism process;GO:0051234//establishment of localization;GO:1902578//single-organism localization;GO:0044765//single-organism transport;GO:0051179//localization
Unigene0061595	22.33333333	6	1.4903	0.912	0.4413	0.1066	0.2971	0.388	0.947866667	0.2639	-1.844692783	0.016339878	1	no	-	--	-	-	-	-
Unigene0070080	3.666666667	11.66666667	0.1531	0.1987	0.2116	0.6385	0.8309	0.5115	0.1878	0.6603	1.813924583	0.016340752	1	no	ANKRD7	PREDICTED: probable serine/threonine-protein kinase irlB [Sinocyclocheilus rhinocerous]	ko04141//Protein processing in endoplasmic reticulum//Folding, sorting and degradation//Genetic Information Processing	-	-	-
Unigene0016285	3.333333333	12.66666667	0.4064	0.2638	0	1.2714	1.1029	0.5555	0.2234	0.9766	2.128138592	0.016363285	1	no	-	PREDICTED: extracellular matrix-binding protein ebh-like, partial [Sinocyclocheilus anshuiensis]	-	-	-	-
Unigene0011130	127	244	2.9036	4.0685	3.3751	9.847	5.7756	6.4037	3.449066667	7.3421	1.089986749	0.01637293	1	no	-	--	-	-	-	-
Unigene0004448	11.66666667	30	0.8918	1.2154	1.0167	3.7938	1.6594	3.25	1.0413	2.901066667	1.478197678	0.016379071	1	no	-	--	-	-	-	-
Unigene0059294	49.33333333	266	2.7663	0	1.0619	8.4614	1.698	11.1322	1.276066667	7.0972	2.475546259	0.016379801	1	no	VTCN1	PREDICTED: ICOS ligand-like isoform X1 [Cyprinus carpio]	-	-	-	-
Unigene0024921	256	101.3333333	7.6823	7.7929	5.1227	3.3947	1.1871	4.0382	6.865966667	2.873333333	-1.256737485	0.016387394	1	no	Adar	PREDICTED: double-stranded RNA-specific adenosine deaminase isoform X1 [Ochotona princeps]	ko04623//Cytosolic DNA-sensing pathway//Immune system//Organismal Systems	GO:0043227//membrane-bounded organelle;GO:0043229//intracellular organelle;GO:0044428//nuclear part;GO:0044424//intracellular part;GO:0005622//intracellular;GO:0044422//organelle part;GO:0043226//organelle;GO:0043231//intracellular membrane-bounded organelle;GO:0044464//cell part;GO:0005623//cell;GO:0044446//intracellular organelle part;GO:0005634//nucleus	GO:0005488//binding	GO:0044238//primary metabolic process;GO:0044763//single-organism cellular process;GO:0042221//response to chemical;GO:0009451//RNA modification;GO:0006139//nucleobase-containing compound metabolic process;GO:0051704//multi-organism process;GO:0044699//single-organism process;GO:0043412//macromolecule modification;GO:0090304//nucleic acid metabolic process;GO:0009987//cellular process;GO:1901360/…
Unigene0061878	1.333333333	7.333333333	0.2244	0.1093	0.1163	0.7021	1.4357	0.6135	0.15	0.9171	2.612116552	0.016430233	1	no	-	--	-	-	-	-
Unigene0029016	17	4	1.6289	0.4699	1.0005	0.3775	0.2105	0.2199	1.0331	0.2693	-1.939693773	0.016455378	1	no	-	PREDICTED: serine/threonine-protein kinase WNK2-like [Sinocyclocheilus grahami]	-	-	-	-
Unigene0008611	17	43	0.3287	0.8266	0.2271	1.5079	1.5609	0.8984	0.4608	1.3224	1.520946008	0.016461976	1	no	Ehbp1l1	PREDICTED: EH domain-binding protein 1-like [Cyprinus carpio]	-	-	-	-
Unigene0063935	7.666666667	0.666666667	0.3983	0.2908	1.6512	0.2492	0	0	0.7801	0.083066667	-3.231317505	0.016501727	1	no	-	--	-	-	-	-
Unigene0032144	9.666666667	0.666666667	0	0.6861	1.0347	0	0.1366	0	0.5736	0.045533333	-3.655050041	0.016523078	1	no	-	PREDICTED: leucine-rich repeat extensin-like protein 5 [Cyprinus carpio]	-	-	-	-
Unigene0063580	2.333333333	11.66666667	0	0.5766	0	0.847	1.0825	1.2336	0.1922	1.054366667	2.455696425	0.016527127	1	no	-	--	-	-	-	-
Unigene0005562	15.33333333	52	0.3044	2.8896	0.2366	5.8091	4.5143	3.0511	1.143533333	4.458166667	1.962952132	0.016599161	1	no	-	--	-	-	-	-
Unigene0010888	12.33333333	31.66666667	0.3947	0.5764	0.4909	0.9878	1.1936	1.7622	0.487333333	1.314533333	1.431569915	0.016607554	1	no	-	PREDICTED: golgin subfamily A member 6-like protein 6 [Cyprinus carpio]	-	-	-	-
Unigene0054151	0.333333333	4	0	0	0.1333	0.8044	0.4486	0.4686	0.044433333	0.573866667	3.691001297	0.01665241	1	no	-	--	-	-	-	-
Unigene0067550	13.33333333	3	1.1542	0.2957	1.0074	0.152	0.1413	0.2767	0.8191	0.19	-2.108040176	0.016692505	1	no	-	--	-	-	-	-
Unigene0026504	3.333333333	12.33333333	0.0569	0.1939	0.0295	0.3204	0.4963	0.337	0.093433333	0.384566667	2.041224475	0.016695833	1	no	-	--	-	-	-	-
Unigene0066904	4.666666667	15	0.3543	0.6899	0.1836	1.8842	1.0302	1.4527	0.409266667	1.4557	1.830599992	0.016698346	1	no	-	--	-	-	-	-
Unigene0067024	0.333333333	6.666666667	0.096	0	0	1.0807	0	0.9618	0.032	0.680833333	4.411157862	0.016728634	1	no	-	--	-	-	-	-
Unigene0002839	7.333333333	23.33333333	0.4885	0.1019	0.1808	0.6113	1.461	0.6359	0.257066667	0.902733333	1.812157329	0.01674847	1	no	-	--	-	-	-	-
Unigene0051935	4.666666667	0	0.6588	1.1545	0	0	0	0	0.604433333	0.001	-9.239439414	0.016775601	1	no	-	--	-	-	-	-
Unigene0027402	50.33333333	111.3333333	3.1281	1.6242	1.5563	4.0708	7.6644	3.7242	2.102866667	5.153133333	1.293092543	0.016787476	1	no	-	--	-	-	-	-
Unigene0038320	1	6.666666667	0.148	0	0.0767	0.3703	0.4302	0.7415	0.0749	0.514	2.778730736	0.016809265	1	no	-	PREDICTED: cytoplasmic dynein 2 heavy chain 1-like [Sinocyclocheilus anshuiensis]	-	-	-	-
Unigene0054341	24	60.66666667	0.8185	1.423	1.9998	7.3889	3.0599	1.9177	1.413766667	4.122166667	1.543858805	0.01681293	1	no	-	PREDICTED: receptor-type tyrosine-protein phosphatase zeta-like [Clupea harengus]	-	-	-	-
Unigene0031604	99	217.6666667	1.6504	0.8034	0.4582	2.6183	1.9538	2.4078	0.970666667	2.326633333	1.261196012	0.016827887	1	no	Pol	pol-like protein [Danio rerio]	-	-	-	-
Unigene0063380	3	13	0	0.3274	0.4357	1.5781	0.6845	1.3023	0.254366667	1.1883	2.223917576	0.016831926	1	no	-	--	-	-	-	-
Unigene0024903	6	41.33333333	0.1533	0.2686	0.1271	0.1534	0.0713	3.2957	0.183	1.173466667	2.680861308	0.016848303	1	no	atp2a1	PREDICTED: sarcoplasmic/endoplasmic reticulum calcium ATPase 1 isoform X2 [Haplochromis burtoni]	ko04020//Calcium signaling pathway//Signal transduction//Environmental Information Processing	GO:0044425//membrane part;GO:0016020//membrane;GO:0031224//intrinsic component of membrane	GO:0016887//ATPase activity;GO:0015399//primary active transmembrane transporter activity;GO:1901363//heterocyclic compound binding;GO:0042625//ATPase coupled ion transmembrane transporter activity;GO:0016817//hydrolase activity, acting on acid anhydrides;GO:0022804//active transmembrane transporter activity;GO:0016818//hydrolase activity, acting on acid anhydrides, in phosphorus-containing anhyd…	GO:1902578//single-organism localization;GO:0006810//transport;GO:0030001//metal ion transport;GO:0006811//ion transport;GO:0051234//establishment of localization;GO:0006816//calcium ion transport;GO:0006812//cation transport;GO:0044699//single-organism process;GO:0070838//divalent metal ion transport;GO:0044765//single-organism transport;GO:0051179//localization;GO:0072511//divalent inorganic ca…
Unigene0069039	6.333333333	24.33333333	0.1888	0.6894	0	0.8861	1.757	1.1184	0.292733333	1.253833333	2.098686651	0.016908966	1	no	pol	Retrovirus-related Pol polyprotein from transposon 297 [Larimichthys crocea]	-	-	-	-
Unigene0042018	345	704	4.0981	1.9667	2.5041	4.416	5.0443	8.6999	2.8563	6.0534	1.08359817	0.016928895	1	no	-	--	-	-	-	-
Unigene0016133	1.333333333	8.333333333	0	0.1211	0.3866	0.6224	0.8677	1.6994	0.169233333	1.063166667	2.651282113	0.016945765	1	no	-	--	-	-	-	-
Unigene0004798	15	35.33333333	1.2073	0.8081	1.4078	2.9269	3.3348	2.5438	1.141066667	2.935166667	1.363059342	0.016968405	1	no	-	--	-	-	-	-
Unigene0032485	1456.666667	3012	23.1744	9.4281	7.4806	17.362	38.6319	32.5959	13.36103333	29.52993333	1.14414651	0.016973975	1	no	LPL	lipoprotein lipase [Ctenopharyngodon idella]	ko03320//PPAR signaling pathway//Endocrine system//Organismal Systems;ko00561//Glycerolipid metabolism//Lipid metabolism//Metabolism	-	GO:0003824//catalytic activity	GO:0008152//metabolic process;GO:0044238//primary metabolic process
Unigene0012861	9.333333333	1.333333333	0.2393	0.1553	0.7442	0.0998	0	0.0727	0.3796	0.0575	-2.722846131	0.017086875	1	no	-	--	-	-	-	-
Unigene0052874	2	10.33333333	0.1748	0	0.3624	1.9687	0.61	0.5575	0.179066667	1.0454	2.545486355	0.017093577	1	no	-	--	-	-	-	-
Unigene0011952	17.33333333	39.66666667	0.9561	0.7447	0.7928	2.1535	2.4465	1.6988	0.8312	2.0996	1.336846943	0.01717089	1	no	-	--	-	-	-	-
Unigene0042207	2.666666667	10	0.1174	0.1523	0.0405	0.6853	0.4095	0.2495	0.1034	0.4481	2.115584541	0.017189731	1	no	-	--	-	-	-	-
Unigene0003784	9.333333333	25	0.9066	0.6304	0.2685	2.1878	1.3556	1.77	0.601833333	1.771133333	1.557236905	0.017191255	1	no	-	PREDICTED: mucin-5AC-like [Sinocyclocheilus anshuiensis]	-	-	-	-
Unigene0023464	16.66666667	43.66666667	1.8381	1.1387	1.2124	7.5272	3.8868	1.4464	1.3964	4.2868	1.618188848	0.017238493	1	no	-	PREDICTED: SLAM family member 5-like [Sinocyclocheilus anshuiensis]	-	-	-	-
Unigene0011670	35.66666667	86	0.7407	0.5449	0.4777	1.2564	0.8615	2.2797	0.587766667	1.465866667	1.318438435	0.017257621	1	no	MGAM	PREDICTED: sucrase-isomaltase, intestinal-like [Sinocyclocheilus rhinocerous]	ko01100//Metabolic pathways//Global and Overview//Metabolism;ko00500//Starch and sucrose metabolism//Carbohydrate metabolism//Metabolism;ko00052//Galactose metabolism//Carbohydrate metabolism//Metabolism	-	-	-
Unigene0057142	33.66666667	74.66666667	3.561	4.0085	3.6909	10.8611	5.4358	10.5448	3.753466667	8.947233333	1.25321797	0.017269661	1	no	-	--	-	-	-	-
Unigene0045991	4.666666667	16	0.6203	0.1812	0.0643	1.1642	1.0099	1.0738	0.2886	1.082633333	1.907401508	0.01728529	1	no	-	--	-	-	-	-
Unigene0062006	3	11.66666667	0.1182	0.1727	0.2451	1.2576	0.4813	0.5925	0.178666667	0.777133333	2.120891644	0.017298376	1	no	-	--	-	-	-	-
Unigene0005679	122.6666667	245	1.8509	2.4759	1.1854	4.199	3.1853	4.5246	1.8374	3.969633333	1.111340021	0.01732784	1	no	-	--	-	-	-	-
Unigene0054600	3.666666667	11.66666667	0.2037	0.2645	0.2816	0.8498	0.7898	0.9281	0.249933333	0.8559	1.775898923	0.017347374	1	no	-	--	-	-	-	-
Unigene0044323	6.333333333	23	0.2475	0.7832	0.1283	0.8517	3.1667	0.7893	0.386333333	1.602566667	2.052466308	0.017357355	1	no	-	--	-	-	-	-
Unigene0005715	3	11.66666667	0.4598	0.2686	0.0953	1.0356	0.6417	1.6758	0.274566667	1.1177	2.025304616	0.017372539	1	no	-	--	-	-	-	-
Unigene0026252	45.33333333	109	1.1376	2.9419	0.7001	3.4252	4.7135	4.4052	1.5932	4.1813	1.392024173	0.017375816	1	no	-	--	-	-	-	-
Unigene0053177	46.33333333	102	0.8646	1.9359	1.1948	5.0846	2.3463	2.4945	1.331766667	3.308466667	1.312821408	0.017403825	1	no	-	--	-	-	-	-
Unigene0055821	1.666666667	9.333333333	0.2808	0	0.194	0.4684	0.7619	1.4496	0.158266667	0.8933	2.496787328	0.017421461	1	no	-	--	-	-	-	-
Unigene0037936	122	242.3333333	0.7312	0.9781	0.456	1.3688	1.5903	1.6954	0.721766667	1.5515	1.104059275	0.017468567	1	no	UNC5D	PREDICTED: netrin receptor UNC5D-like isoform X1 [Sinocyclocheilus anshuiensis]	-	-	-	-
Unigene0017321	2.333333333	12.33333333	0.2605	0.3382	0	2.1731	0.303	1.1077	0.199566667	1.1946	2.581584952	0.01747232	1	no	-	--	-	-	-	-
Unigene0053487	34	83.33333333	3.5912	2.2725	3.35	12.2451	3.2369	8.9982	3.071233333	8.160066667	1.409762815	0.017543253	1	no	-	--	-	-	-	-
Unigene0061089	1	6.666666667	0.2559	0.1246	0	0.9606	1.4881	0.4663	0.126833333	0.971666667	2.937527525	0.017572894	1	no	-	--	-	-	-	-
Unigene0056482	10	1.333333333	1.9619	0.4775	1.2709	0	0.5704	0	1.236766667	0.190133333	-2.701489955	0.017585502	1	no	-	--	-	-	-	-
Unigene0065179	13.33333333	3	0.9606	1.336	0.4267	0.2576	0.0798	0.3126	0.907766667	0.216666667	-2.066844296	0.017613063	1	no	-	--	-	-	-	-
Unigene0012726	21.33333333	47.66666667	1.0725	0.9533	0.9666	1.9838	2.6031	2.5916	0.997466667	2.392833333	1.262379378	0.017617974	1	no	-	--	-	-	-	-
Unigene0040669	358	705.3333333	2.7619	5.1512	2.4408	5.6871	6.2553	9.642	3.4513	7.1948	1.0598147	0.017633253	1	no	Nedd9	PREDICTED: enhancer of filamentation 1 [Sinocyclocheilus rhinocerous]	-	-	-	-
Unigene0001598	5.666666667	0	1.6019	0	0.2214	0	0	0	0.607766667	0.001	-9.247373741	0.017644924	1	no	-	--	-	-	-	-
Unigene0032115	5.333333333	0	0.1892	0	1.3726	0	0	0	0.5206	0.001	-9.024031502	0.017649548	1	no	-	--	-	-	-	-
Unigene0049004	5	33.66666667	0.1568	0.0139	0.0443	0.0357	1.575	0.052	0.071666667	0.554233333	2.951119323	0.017677377	1	no	Slc6a13	PREDICTED: sodium- and chloride-dependent GABA transporter 2-like [Sinocyclocheilus grahami]	-	GO:0016020//membrane;GO:0031224//intrinsic component of membrane;GO:0044425//membrane part	GO:0022857//transmembrane transporter activity;GO:0022804//active transmembrane transporter activity;GO:0015291//secondary active transmembrane transporter activity;GO:0005215//transporter activity	GO:0044763//single-organism cellular process;GO:0051234//establishment of localization;GO:0044765//single-organism transport;GO:0044699//single-organism process;GO:0006810//transport;GO:0009987//cellular process;GO:1902578//single-organism localization;GO:0051179//localization
Unigene0052740	4.333333333	0.333333333	0.2316	0.3007	0.4802	0.0966	0	0	0.3375	0.0322	-3.389754909	0.017684738	1	no	-	--	-	-	-	-
Unigene0004779	295.3333333	557.3333333	4.9946	6.8001	5.157	8.4527	10.6387	14.6637	5.650566667	11.2517	0.993675532	0.017728409	1	no	-	--	-	-	-	-
Unigene0063538	4	15	0.1778	0.4326	0.4606	2.113	0.4135	1.7815	0.357	1.436	2.00805977	0.017807558	1	no	-	--	-	-	-	-
Unigene0049389	7.666666667	1.333333333	1.0015	0.7584	0.8074	0	0.2588	0.2028	0.855766667	0.153866667	-2.475536762	0.017807828	1	no	-	--	-	-	-	-
Unigene0020430	18.33333333	50	0.7343	0.3205	0.3412	0.8554	0.9129	2.1225	0.465333333	1.296933333	1.478767881	0.017815329	1	no	-	--	-	-	-	-
Unigene0073418	9.333333333	1.333333333	0.658	0.5605	1.1083	0.3088	0.0957	0	0.7756	0.134833333	-2.524135602	0.01783813	1	yes	Dfnb31	PREDICTED: whirlin-like [Sinocyclocheilus grahami]	-	-	-	-
Unigene0015525	15.33333333	4	0.9326	1.15	0.7733	0.389	0.2169	0.2266	0.951966667	0.2775	-1.778423287	0.017839848	1	no	-	--	-	-	-	-
Unigene0073417	0.666666667	5	0.1094	0.1065	0	0.8217	0.3819	0.5983	0.071966667	0.600633333	3.0610838	0.017872762	1	yes	-	--	-	-	-	-
Unigene0063911	2.666666667	11	0.2171	0.5284	0.1125	2.7164	0.8837	0.5934	0.286	1.397833333	2.289105303	0.01803603	1	no	-	--	-	-	-	-
Unigene0011183	4	14	0.1991	0.6785	0.3096	1.3705	0.9264	2.0866	0.395733333	1.461166667	1.884520251	0.018038639	1	no	-	--	-	-	-	-
Unigene0049602	3	10.66666667	0.0926	0.4508	0.2879	1.6223	1.1847	0.5906	0.2771	1.132533333	2.031074897	0.018041387	1	no	-	--	-	-	-	-
Unigene0063179	3	12.66666667	0.4851	0.1889	0.2011	2.1851	0.4513	1.4143	0.2917	1.350233333	2.210651449	0.018076327	1	no	-	--	-	-	-	-
Unigene0054020	14	34.66666667	1.188	0.8164	0.9416	4.547	1.9506	1.7828	0.982	2.760133333	1.490943031	0.018088363	1	no	-	PREDICTED: platelet glycoprotein Ib alpha chain-like [Cyprinus carpio]	-	-	-	-
Unigene0004426	0	4	0	0	0	0.4332	0	0.1577	0.001	0.196966667	7.621807688	0.018092446	1	no	-	--	-	-	-	-
Unigene0007507	60.66666667	16	3.3543	0.2721	2.8248	0.787	0.447	0.6049	2.1504	0.612966667	-1.810724516	0.018105801	1	no	-	--	-	-	-	-
Unigene0012693	3.333333333	0	0.2264	0.0735	0.4693	0	0	0	0.2564	0.001	-8.002252452	0.018117799	1	no	-	--	-	-	-	-
Unigene0028417	37	5.333333333	3.1462	0	3.3202	0.6442	0.2661	0.1564	2.155466667	0.355566667	-2.599808265	0.018142656	1	no	-	--	-	-	-	-
Unigene0070839	1.333333333	7.333333333	0	0.2194	0.2336	0.7051	0.9175	1.0269	0.151	0.883166667	2.548137172	0.018190821	1	no	-	--	-	-	-	-
Unigene0057097	6.333333333	21	0.1409	0.9601	0.219	2.556	1.5565	0.9627	0.44	1.691733333	1.942926747	0.018213817	1	no	-	ORF2 [Xenopus laevis]	-	-	-	-
Unigene0051088	1.666666667	23	0.3396	0.0826	0	0.2124	0	5.1821	0.140733333	1.798166667	3.675490763	0.0182503	1	no	-	--	-	-	-	-
Unigene0000436	8.333333333	22	0.439	0.7835	0.6067	2.1972	1.6167	1.5332	0.609733333	1.782366667	1.547543834	0.018252649	1	no	-	--	-	-	-	-
Unigene0039767	3.666666667	0	0.1226	0.2387	1.0167	0	0	0	0.459333333	0.001	-8.843397672	0.018274295	1	no	-	--	-	-	-	-
Unigene0039004	122.6666667	242	2.1413	2.3803	1.0389	3.8195	4.7158	3.5699	1.8535	4.035066667	1.122340394	0.018279098	1	no	-	--	-	-	-	-
Unigene0072394	32.33333333	108	0.1115	4.1255	1.098	9.4188	6.0309	4.8771	1.778333333	6.7756	1.929822937	0.018305569	1	no	-	--	-	-	-	-
Unigene0068997	9.666666667	1.666666667	0.6136	1.792	0.5299	0.128	0.2379	0.1863	0.9785	0.184066667	-2.410343464	0.018312169	1	no	-	--	-	-	-	-
Unigene0035219	1.666666667	17.33333333	0	0.2886	0.2049	0	5.6319	0.2701	0.1645	1.967333333	3.580081931	0.018379131	1	no	-	--	-	-	-	-
Unigene0006740	0	6.666666667	0	0	0	2.464	0	0	0.001	0.821333333	9.68182404	0.018516229	1	no	-	PREDICTED: golgin subfamily A member 6-like protein 22 isoform X39 [Salmo salar]	-	-	-	-
Unigene0014730	13.33333333	2.333333333	1.4332	0.3907	0.4753	0.2869	0.1333	0.0522	0.7664	0.157466667	-2.283051097	0.018564102	1	no	-	--	-	-	-	-
Unigene0005156	33.33333333	69.66666667	1.6657	1.1757	1.338	3.9602	2.906	2.7698	1.393133333	3.212	1.205138552	0.018576433	1	no	-	--	-	-	-	-
Unigene0070515	2.333333333	10	0.0833	0.4865	0	0.8337	1.2592	0.683	0.189933333	0.9253	2.28442807	0.018607364	1	no	-	--	-	-	-	-
Unigene0029006	7.333333333	21.33333333	0.7357	0.2387	0.3813	1.3041	2.2104	0.8938	0.4519	1.469433333	1.701184445	0.018638996	1	no	-	--	-	-	-	-
Unigene0016452	8.666666667	28	0.2006	0.586	0.2496	0.5021	1.1668	1.7916	0.3454	1.1535	1.739678016	0.018641502	1	no	-	PREDICTED: paraneoplastic antigen Ma3 homolog [Cyprinodon variegatus]	-	-	-	-
Unigene0068726	0.666666667	5.666666667	0.1157	0	0.1199	0.8683	0.269	0.9484	0.078533333	0.695233333	3.146120216	0.018643496	1	no	-	--	-	-	-	-
Unigene0020257	4.333333333	19.66666667	0.4527	0.2938	0.2346	0.0944	2.194	2.2688	0.327033333	1.519066667	2.215675589	0.018660277	1	no	-	--	-	-	-	-
Unigene0040192	14.66666667	1.666666667	1.2258	0	0.726	0.0548	0	0.1595	0.6506	0.071433333	-3.187101473	0.018670144	1	no	-	--	-	-	-	-
Unigene0035004	2.666666667	11.66666667	0.179	0.2613	0.2782	2.5751	0.6244	0.4892	0.2395	1.229566667	2.360052398	0.018705829	1	no	-	--	-	-	-	-
Unigene0035778	10.33333333	34.33333333	0.2723	1.5908	0.2117	3.7485	1.1878	2.7295	0.6916	2.555266667	1.885464084	0.0187182	1	no	-	--	-	-	-	-
Unigene0060433	6.333333333	0.666666667	0.0886	0.1725	0.306	0	0	0.0538	0.189033333	0.017933333	-3.397925078	0.018767456	1	no	HEBP2	PREDICTED: heme-binding protein 2-like [Sinocyclocheilus rhinocerous]	-	-	-	-
Unigene0068086	3	11.33333333	0.1463	0.2849	0	0.6103	0.5673	0.6222	0.143733333	0.599933333	2.061407515	0.018791545	1	no	-	--	-	-	-	-
Unigene0009103	8.333333333	24.33333333	0.2664	0.6226	0.4419	1.3336	0.8057	1.9422	0.443633333	1.3605	1.616697282	0.018815259	1	no	-	--	-	-	-	-
Unigene0024586	3	12.66666667	0.1693	0.0659	0.0702	0.6357	0.1576	0.5863	0.1018	0.459866667	2.175478067	0.018824988	1	no	Chl1	PREDICTED: LOW QUALITY PROTEIN: neural cell adhesion molecule L1-like protein [Sinocyclocheilus grahami]	-	-	-	-
Unigene0047269	59.33333333	125	3.0816	6.811	4.9205	16.7786	8.4273	9.6374	4.9377	11.61443333	1.234007677	0.018844216	1	no	-	--	-	-	-	-
Unigene0004310	23.66666667	58	0.6089	1.3337	1.6828	3.9997	1.8883	3.6521	1.208466667	3.180033333	1.395864208	0.01884718	1	no	-	--	-	-	-	-
Unigene0046974	11.33333333	30	0.7906	0.5498	0.5853	3.2504	0.8538	1.595	0.6419	1.899733333	1.565376455	0.018883225	1	no	-	--	-	-	-	-
Unigene0006350	10	28.66666667	2.4077	0.6169	0.7881	4.2813	2.9477	4.503	1.2709	3.910666667	1.621564053	0.018910756	1	no	-	--	-	-	-	-
Unigene0028007	0.333333333	4.333333333	0.0916	0	0	0.4587	0.2132	0.5845	0.030533333	0.4188	3.77780444	0.018964695	1	no	-	--	-	-	-	-
Unigene0045909	3.666666667	12	0.4444	0.2596	0.2764	2.0018	0.9303	0.7288	0.3268	1.2203	1.900755977	0.019006904	1	no	-	--	-	-	-	-
Unigene0029283	38.66666667	6	3.6826	0.1086	0.5398	0.0931	0.5624	0.1017	1.443666667	0.2524	-2.515953856	0.019068926	1	no	-	--	-	-	-	-
Unigene0013698	7.333333333	20	0.3558	0.1924	0.3278	0.6925	1.1953	0.7203	0.292	0.869366667	1.573996412	0.019095292	1	no	-	--	-	-	-	-
Unigene0014018	23.66666667	5.666666667	1.1948	0.1292	1.0664	0.1661	0.1158	0.3024	0.7968	0.194766667	-2.032470859	0.019100633	1	no	-	PREDICTED: junctional protein associated with coronary artery disease-like [Cyprinus carpio]	-	-	-	-
Unigene0005163	1.666666667	10	0.1321	0.0643	0.1369	0.6612	0.1536	1.2036	0.1111	0.6728	2.598318889	0.019141032	1	no	Lamb3	PREDICTED: laminin subunit beta-3 [Sinocyclocheilus anshuiensis]	ko04510//Focal adhesion//Cellular commiunity//Cellular Processes;ko04512//ECM-receptor interaction//Signaling molecules and interaction//Environmental Information Processing;ko04151//PI3K-Akt signaling pathway//Signal transduction//Environmental Information Processing	GO:0043256//laminin complex;GO:0005604//basement membrane;GO:0005578//proteinaceous extracellular matrix;GO:0032991//macromolecular complex;GO:0005605//basal lamina;GO:0031012//extracellular matrix;GO:0044421//extracellular region part;GO:0043234//protein complex;GO:0005576//extracellular region;GO:0044420//extracellular matrix component	GO:0005515//protein binding;GO:0005488//binding	GO:0048869//cellular developmental process;GO:0032502//developmental process;GO:0009987//cellular process;GO:0044763//single-organism cellular process;GO:0044767//single-organism developmental process;GO:0045444//fat cell differentiation;GO:0044699//single-organism process;GO:0030154//cell differentiation
Unigene0053781	2.666666667	11.33333333	0.2354	0.1146	0.61	2.5039	1.5059	0.6435	0.32	1.5511	2.27714789	0.019145484	1	no	-	--	-	-	-	-
Unigene0017834	4.333333333	0	0.3996	0.3334	0	0	0	0	0.244333333	0.001	-7.932706887	0.019146868	1	no	-	--	-	-	-	-
Unigene0031099	1.666666667	8.333333333	0.163	0.0793	0.1689	0.4079	0.6635	1.0395	0.137066667	0.703633333	2.359946066	0.01915462	1	no	-	--	-	-	-	-
Unigene0044291	1.333333333	8.666666667	0.1167	0.2272	0.1209	2.7739	0.2714	0.5315	0.154933333	1.192266667	2.943987477	0.019167633	1	no	-	--	-	-	-	-
Unigene0028656	3.333333333	15	0.2102	0.3411	0.1452	0.7891	0.2445	2.1067	0.232166667	1.046766667	2.172707132	0.019179007	1	no	PAPLN	PREDICTED: papilin-like [Sinocyclocheilus anshuiensis]	-	GO:0031012//extracellular matrix	GO:0005488//binding;GO:0070011//peptidase activity, acting on L-amino acid peptides;GO:0003824//catalytic activity;GO:0043169//cation binding;GO:0043167//ion binding;GO:0016787//hydrolase activity;GO:0008233//peptidase activity;GO:0046872//metal ion binding;GO:0046914//transition metal ion binding	-
Unigene0061225	0	6	0	0	0	0.0941	0	1.1654	0.001	0.419833333	8.713672906	0.019266098	1	no	Nr0b2	PREDICTED: nuclear receptor subfamily 0 group B member 2-like [Sinocyclocheilus anshuiensis]	-	-	-	GO:0044260//cellular macromolecule metabolic process;GO:0034645//cellular macromolecule biosynthetic process;GO:0043170//macromolecule metabolic process;GO:0034654//nucleobase-containing compound biosynthetic process;GO:0019438//aromatic compound biosynthetic process;GO:1901362//organic cyclic compound biosynthetic process;GO:1901360//organic cyclic compound metabolic process;GO:0044238//primary …
Unigene0059413	19.33333333	43	0.8198	1.3506	1.5033	3.3929	3.1537	2.4706	1.224566667	3.005733333	1.295445702	0.019313306	1	no	NLRP1	PREDICTED: NACHT, LRR and PYD domains-containing protein 12-like [Cyprinus carpio]	-	-	-	-
Unigene0061487	1.333333333	7.666666667	0.2264	0.2204	0	0.8498	1.7113	0.4125	0.148933333	0.9912	2.734509502	0.019370098	1	no	-	protocadherin cluster 1 gamma 18a [Danio rerio]	-	-	-	-
Unigene0066676	1.666666667	10	0.1246	0.0607	0.1292	1.7155	0.145	0.3407	0.104833333	0.733733333	2.807158312	0.019409794	1	no	-	PREDICTED: adhesion G protein-coupled receptor E1-like [Danio rerio]	-	-	-	-
Unigene0014843	7.666666667	30.66666667	0.1558	0.9606	0.0538	0.5198	3.0199	1.6088	0.390066667	1.716166667	2.137397045	0.019476054	1	no	-	--	-	-	-	-
Unigene0061227	12.66666667	0.666666667	2.5025	0	0.1441	0.174	0	0	0.8822	0.058	-3.926980955	0.019574946	1	no	-	--	-	-	-	-
Unigene0064227	1	6.666666667	0	0	0.346	1.114	0.7765	0.6084	0.115333333	0.832966667	2.852449226	0.019620983	1	no	-	--	-	-	-	-
Unigene0016158	3.666666667	38.66666667	0.3196	0	0.1893	0.1143	0.0531	4.7015	0.169633333	1.622966667	3.258141774	0.01964387	1	no	-	PREDICTED: cytochrome P450 2K1-like [Sinocyclocheilus rhinocerous]	-	-	-	-
Unigene0049252	98.66666667	190.3333333	0.7295	0.718	0.9123	2.0539	1.2358	1.6617	0.7866	1.650466667	1.06917191	0.019661963	1	no	Ehd2	PREDICTED: EH domain-containing protein 2-like [Sinocyclocheilus rhinocerous]	ko04144//Endocytosis//Transport and catabolism//Cellular Processes	-	GO:0032549//ribonucleoside binding;GO:0043167//ion binding;GO:0097159//organic cyclic compound binding;GO:0043169//cation binding;GO:0036094//small molecule binding;GO:0016787//hydrolase activity;GO:0032550//purine ribonucleoside binding;GO:0016462//pyrophosphatase activity;GO:0046872//metal ion binding;GO:0001883//purine nucleoside binding;GO:0003824//catalytic activity;GO:0017111//nucleoside-tr…	-
Unigene0037361	22.66666667	55.66666667	3.7991	1.7965	1.8001	5.0254	5.0497	8.901	2.465233333	6.325366667	1.359424908	0.019704134	1	no	-	--	-	-	-	-
Unigene0065207	4.333333333	14	0.2887	0.4918	0.1496	1.806	1.1751	0.526	0.310033333	1.169033333	1.914820826	0.019716858	1	no	Nav1	PREDICTED: neuron navigator 1-like [Cyprinus carpio]	-	-	-	-
Unigene0025990	3	13.33333333	0.1859	0.2714	0.3853	1.1628	0.4323	2.2015	0.280866667	1.265533333	2.171788187	0.019733646	1	no	-	--	-	-	-	-
Unigene0064298	7.666666667	0.666666667	0.3909	1.6175	0.2026	0.2446	0	0	0.737	0.081533333	-3.176202716	0.019744678	1	no	-	--	-	-	-	-
Unigene0003913	7.666666667	0.333333333	1.3863	0	0.3025	0.0913	0	0	0.562933333	0.030433333	-4.209239813	0.019757483	1	no	-	PREDICTED: LOW QUALITY PROTEIN: zinc-alpha-2-glycoprotein-like [Cyprinus carpio]	-	-	-	-
Unigene0060195	2	19.33333333	0	0	0.362	1.6752	0	1.8563	0.120666667	1.177166667	3.286219494	0.019788942	1	no	-	hypothetical protein cypCar_00015977 [Cyprinus carpio]	-	-	-	-
Unigene0059853	0	4	0	0	0	0.4304	1.2001	0	0.001	0.5435	9.086136225	0.019805314	1	no	A2m	alpha-2-macroglobulin, partial [Hypophthalmichthys nobilis]	-	-	-	-
Unigene0023534	63.33333333	122.3333333	1.6523	1.443	1.5363	3.2836	3.8151	2.7452	1.543866667	3.2813	1.087719339	0.019819884	1	no	-	LOC567658 protein, partial [Danio rerio]	-	-	-	-
Unigene0018885	7.666666667	21	0.476	0.2949	0.2243	1.1913	0.7046	1.0646	0.331733333	0.986833333	1.572782463	0.019828565	1	no	-	--	-	-	-	-
Unigene0022183	8.333333333	1.666666667	0.7049	1.1765	0.6263	0.126	0.2342	0.1835	0.8359	0.181233333	-2.205482033	0.019869028	1	no	-	--	-	-	-	-
Unigene0057862	30.33333333	7.333333333	2.607	0.2884	2.5793	0.5931	0.2067	0.5938	1.8249	0.464533333	-1.973963382	0.01996047	1	no	-	PREDICTED: protein NLRC5-like, partial [Sinocyclocheilus grahami]	-	-	-	-
Unigene0024530	10.33333333	26	0.5567	0.3097	0.371	1.5426	1.11	0.8334	0.412466667	1.162	1.49426063	0.019960606	1	no	-	--	-	-	-	-
Unigene0051089	6.666666667	34.66666667	0.1541	0.2251	0.1331	0.0964	2.8981	0.0936	0.170766667	1.029366667	2.591658674	0.020070819	1	no	-	pG1 protein, partial [Homo sapiens]	-	-	-	-
Unigene0004084	46.33333333	14.33333333	1.2764	3.8166	1.1812	0.2852	0.9013	0.8722	2.0914	0.686233333	-1.607697907	0.020082051	1	no	-	--	-	-	-	-
Unigene0004805	23	55	1.4013	2.4557	0.9441	4.6467	2.6077	5.1072	1.600366667	4.120533333	1.364428597	0.020146612	1	no	-	--	-	-	-	-
Unigene0017940	0	3	0	0	0	0.3696	0.1145	0.4485	0.001	0.310866667	8.280152119	0.020209961	1	no	FLNB	PREDICTED: filamin-A [Danio rerio]	ko04010//MAPK signaling pathway//Signal transduction//Environmental Information Processing;ko04510//Focal adhesion//Cellular commiunity//Cellular Processes	GO:0005622//intracellular;GO:0005924//cell-substrate adherens junction;GO:0005912//adherens junction;GO:0016020//membrane;GO:0030055//cell-substrate junction;GO:0044464//cell part;GO:0044424//intracellular part;GO:0030054//cell junction;GO:0070161//anchoring junction;GO:0005623//cell	GO:0005488//binding;GO:0008092//cytoskeletal protein binding;GO:0005515//protein binding	GO:0009888//tissue development;GO:0060537//muscle tissue development;GO:0048856//anatomical structure development;GO:0014706//striated muscle tissue development;GO:0032502//developmental process
Unigene0008473	24.33333333	6.333333333	1.3045	1.0006	0.5736	0.1979	0.5517	0.1081	0.959566667	0.2859	-1.746872422	0.020218238	1	no	-	--	-	-	-	-
Unigene0052614	33.66666667	73.33333333	2.1806	1.4153	0.9888	4.9455	4.174	2.2352	1.528233333	3.7849	1.30839035	0.020231216	1	no	-	--	-	-	-	-
Unigene0000573	118	41	10.3825	4.5392	2.0426	1.8645	2.0685	2.4088	5.654766667	2.113933333	-1.419537616	0.020231604	1	no	-	PREDICTED: mucin-2-like [Sinocyclocheilus anshuiensis]	-	-	-	-
Unigene0005470	1.333333333	7	0.2264	0.2204	0	1.133	0.9215	0.6188	0.148933333	0.8911	2.580920656	0.020247386	1	no	-	--	-	-	-	-
Unigene0014670	2.333333333	9.666666667	0.0823	0.3203	0.1705	1.1321	0.574	0.8993	0.191033333	0.868466667	2.184646081	0.020251404	1	no	-	PREDICTED: myosin heavy chain, skeletal muscle-like [Cyprinus carpio]	-	-	-	-
Unigene0065379	5	14.66666667	0.3302	0.4501	0.2054	1.405	0.9986	0.8425	0.328566667	1.082033333	1.719486913	0.020281833	1	no	-	--	-	-	-	-
Unigene0028621	3.666666667	13.33333333	0.5234	0.1019	0.5425	2.3578	1.0958	1.24	0.389266667	1.564533333	2.006901681	0.020302335	1	no	-	--	-	-	-	-
Unigene0028235	14	2.666666667	1.1465	0.1674	1.1289	0	0.0667	0.3656	0.814266667	0.1441	-2.498431009	0.020311391	1	no	PTPN13	PREDICTED: tyrosine-protein phosphatase non-receptor type 13-like [Cyprinus carpio]	-	-	-	-
Unigene0043242	221.3333333	501.3333333	7.4711	8.8009	8.5954	13.4618	44.3583	6.637	8.289133333	21.4857	1.374083606	0.020325264	1	no	-	CHK1 checkpoint-like protein, partial [Perca flavescens]	-	-	GO:0016301//kinase activity;GO:0097367//carbohydrate derivative binding;GO:0032549//ribonucleoside binding;GO:1901363//heterocyclic compound binding;GO:0032550//purine ribonucleoside binding;GO:0097159//organic cyclic compound binding;GO:0036094//small molecule binding;GO:0005488//binding;GO:0016772//transferase activity, transferring phosphorus-containing groups;GO:0016740//transferase activity;…	GO:0043412//macromolecule modification;GO:0044260//cellular macromolecule metabolic process;GO:0071704//organic substance metabolic process;GO:0008152//metabolic process;GO:0019538//protein metabolic process;GO:0009987//cellular process;GO:0036211//protein modification process;GO:0044267//cellular protein metabolic process;GO:0043170//macromolecule metabolic process;GO:0006464//cellular protein m…
Unigene0072140	0.666666667	5.666666667	0	0	0.1874	0.9049	0.6308	0.2471	0.062466667	0.594266667	3.249952008	0.020335501	1	no	-	PREDICTED: sterile alpha motif domain-containing protein 3-like isoform X2 [Oreochromis niloticus]	-	-	-	-
Unigene0016276	1	6.333333333	0.2102	0.1023	0	0.6575	0.4889	0.9576	0.104166667	0.701333333	2.75120661	0.020358721	1	no	-	--	-	-	-	-
Unigene0046950	26.33333333	72.66666667	1.9831	1.2871	0.1827	2.8122	4.8178	2.9311	1.150966667	3.520366667	1.61287965	0.020430535	1	no	-	--	-	-	-	-
Unigene0058525	5	15.33333333	0.321	0.7032	0.1664	1.7072	1.1201	1.2431	0.396866667	1.3568	1.773481776	0.020458563	1	no	TRIM29	PREDICTED: tripartite motif-containing protein 29-like, partial [Cyprinus carpio]	-	-	-	-
Unigene0070185	4	12.33333333	0.2547	0.3719	0.132	1.1153	0.7405	0.7541	0.252866667	0.869966667	1.782583253	0.020491372	1	no	-	--	-	-	-	-
Unigene0065955	3	15	0	0.6188	0	1.5907	1.725	0.3861	0.206266667	1.233933333	2.58068185	0.020494197	1	no	-	PREDICTED: uncharacterized protein LOC109061345 [Cyprinus carpio]	-	-	-	-
Unigene0000136	4.666666667	15.66666667	0.2344	0.4564	0.4049	2.7373	0.5452	0.9254	0.365233333	1.402633333	1.941247574	0.020514358	1	no	-	--	-	-	-	-
Unigene0055726	211.3333333	445.6666667	1.8286	1.5916	4.3681	6.7432	3.7324	6.9183	2.5961	5.797966667	1.159201083	0.020523487	1	no	HHIPL2	PREDICTED: HHIP-like protein 2 [Sinocyclocheilus anshuiensis]	-	-	GO:0005488//binding;GO:0003824//catalytic activity;GO:0016491//oxidoreductase activity;GO:0048037//cofactor binding;GO:0016614//oxidoreductase activity, acting on CH-OH group of donors	GO:0044238//primary metabolic process;GO:0008152//metabolic process;GO:0044699//single-organism process;GO:0044710//single-organism metabolic process
Unigene0004513	8	23.66666667	0.4956	0.5897	0.2283	1.7225	0.6404	1.8061	0.437866667	1.389666667	1.66617534	0.020558375	1	no	-	--	-	-	-	-
Unigene0020982	4.333333333	0.333333333	0.5733	0.4465	0.4753	0	0.1333	0	0.498366667	0.044433333	-3.487493297	0.020575615	1	no	-	--	-	-	-	-
Unigene0063327	1.666666667	8.333333333	0.3217	0.2088	0	1.4759	0.6235	0.8793	0.176833333	0.9929	2.489258174	0.02062688	1	no	-	--	-	-	-	-
Unigene0018851	21.33333333	46.33333333	0.6324	0.5418	0.4457	1.3294	1.2062	1.2907	0.539966667	1.275433333	1.240045237	0.020644843	1	no	-	--	-	-	-	-
Unigene0006319	5.333333333	17.33333333	0.656	0.3193	0.34	0.9234	1.1444	2.316	0.438433333	1.461266667	1.736790086	0.020646645	1	no	-	--	-	-	-	-
Unigene0008957	21.33333333	60.33333333	0.2936	1.5436	1.9478	5.5846	1.7075	4.2805	1.261666667	3.857533333	1.612347824	0.020676398	1	no	-	PREDICTED: E3 ubiquitin/ISG15 ligase TRIM25-like [Sinocyclocheilus grahami]	-	-	-	-
Unigene0058561	4.666666667	14.33333333	0.182	0.7089	0.3773	1.7083	1.7995	0.9122	0.422733333	1.473333333	1.801264088	0.020698591	1	no	-	--	-	-	-	-
Unigene0030582	124.3333333	284	3.9967	1.0041	1.909	4.0792	5.0339	7.3838	2.303266667	5.498966667	1.255479089	0.020732143	1	no	Cadm1	PREDICTED: cell adhesion molecule 1 isoform X1 [Danio rerio]	ko04514//Cell adhesion molecules (CAMs)//Signaling molecules and interaction//Environmental Information Processing	GO:0016020//membrane;GO:0031224//intrinsic component of membrane;GO:0044425//membrane part	-	-
Unigene0057651	16.33333333	4.666666667	0.458	0.8545	0.5538	0.0955	0.0888	0.3477	0.6221	0.177333333	-1.810682761	0.02073305	1	no	-	--	-	-	-	-
Unigene0049025	873.6666667	265	0.7187	1.7665	9.4263	0.7605	0.7275	2.0898	3.9705	1.1926	-1.735210454	0.020751058	1	no	pol	PREDICTED: uncharacterized protein LOC109045635 [Cyprinus carpio]	-	-	-	-
Unigene0053237	57	119.3333333	1.684	2.6232	0.8886	4.4826	4.3801	3.2919	1.731933333	4.051533333	1.226084612	0.020792024	1	no	-	--	-	-	-	-
Unigene0069520	3	0	0.3757	0.3657	0.0973	0	0	0	0.279566667	0.001	-8.127048545	0.020798107	1	no	-	integrin beta-like protein 1 precursor [Danio rerio]	-	-	-	-
Unigene0062795	1.666666667	8	0.0985	0.0959	0.051	0.2464	0.5153	0.4934	0.0818	0.418366667	2.354595161	0.020811036	1	no	-	--	-	-	-	-
Unigene0064907	6	0	1.2577	0	0.0767	0	0	0	0.4448	0.001	-8.797012978	0.020833103	1	no	-	--	-	-	-	-
Unigene0014746	8	24	0.1411	0.2747	0.4386	0.5295	0.8203	1.2853	0.2848	0.878366667	1.62487416	0.020847664	1	no	-	--	-	-	-	-
Unigene0030364	252.3333333	444.6666667	4.158	4.0195	2.8984	7.2729	7.1176	6.9233	3.691966667	7.1046	0.944363898	0.020871598	1	no	CDC42EP2	PREDICTED: cdc42 effector protein 2-like [Sinocyclocheilus rhinocerous]	-	-	-	-
Unigene0023699	20	49.33333333	0.2354	1.1078	1.0167	2.2585	2.5099	1.6803	0.786633333	2.149566667	1.450282628	0.020917363	1	no	-	--	-	-	-	-
Unigene0008674	31.33333333	70	1.8132	1.2609	3.0874	6.2391	3.6904	4.9561	2.053833333	4.961866667	1.272563855	0.020945851	1	no	-	--	-	-	-	-
Unigene0044713	30.66666667	66.66666667	1.2368	1.3287	1.3703	4.0025	1.9345	3.3419	1.311933333	3.092966667	1.237296875	0.020946466	1	no	-	--	-	-	-	-
Unigene0069579	0	4.666666667	0	0	0	0	0.2088	0.9816	0.001	0.3968	8.632268215	0.020964903	1	no	-	--	-	-	-	-
Unigene0073134	5	15.66666667	0.1865	0.3632	0.145	1.4003	0.4881	0.5948	0.231566667	0.827733333	1.83773846	0.020999105	1	notest	KLF5	Krueppel-like factor 5-like [Danio rerio]	-	-	-	-
Unigene0058443	10.66666667	28.66666667	0.409	0.1991	0.4946	1.834	1.0704	0.4969	0.367566667	1.133766667	1.625045914	0.021012457	1	no	-	--	-	-	-	-
Unigene0051450	583.6666667	1017	79.455	84.4411	55.5528	110.8867	158.9792	143.6451	73.14963333	137.837	0.914040669	0.021037093	1	no	AHNAK	PREDICTED: neuroblast differentiation-associated protein AHNAK isoform X6 [Sinocyclocheilus rhinocerous]	-	-	-	-
Unigene0073156	4.333333333	13	0.3579	0.2323	0.1855	0.821	0.7631	0.924	0.258566667	0.836033333	1.693024164	0.021060885	1	notest	-	--	-	-	-	-
Unigene0040484	20.33333333	55.33333333	0.9573	0.699	3.3074	8.2851	3.3401	3.4162	1.654566667	5.0138	1.599451026	0.021071443	1	no	-	--	-	-	-	-
Unigene0064816	0.666666667	6.333333333	0	0	0.2179	1.7096	0.3667	0.2873	0.072633333	0.787866667	3.439247802	0.021134819	1	no	-	--	-	-	-	-
Unigene0005241	114	230.3333333	2.2238	2.1975	1.2824	3.1174	3.5976	5.4387	1.901233333	4.051233333	1.091425579	0.021157063	1	no	-	--	-	-	-	-
Unigene0046911	1038.666667	1796.333333	23.3633	33.4306	20.2096	72.636	50.3685	29.3009	25.66783333	50.76846667	0.983971167	0.021174185	1	no	-	--	-	-	-	-
Unigene0069648	12.33333333	3	0.4842	0.4242	0.9033	0.0606	0.2816	0.1323	0.6039	0.158166667	-1.932864086	0.021207252	1	no	CHT1	PREDICTED: high-affinity choline transporter 1-like [Cyprinus carpio]	-	-	-	-
Unigene0001235	8	24	0.3144	0.9181	0.6517	3.5402	0.8226	1.9334	0.628066667	2.098733333	1.74052926	0.021211248	1	no	-	--	-	-	-	-
Unigene0023383	13.66666667	32.33333333	0.4235	0.2199	0.5268	1.3072	0.9523	0.7975	0.390066667	1.019	1.385361429	0.021240372	1	no	Ttn	PREDICTED: LOW QUALITY PROTEIN: titin-like [Sinocyclocheilus rhinocerous]	-	-	-	-
Unigene0019961	4.333333333	13	0.4106	0.3998	0.532	1.6699	1.0745	1.5901	0.447466667	1.444833333	1.691050962	0.021244801	1	no	-	--	-	-	-	-
Unigene0072511	13.33333333	31	0.3341	0.4731	0.4092	0.9881	1.3777	0.7749	0.405466667	1.0469	1.368468422	0.021248135	1	notest	SFRP5	PREDICTED: secreted frizzled-related protein 5-like [Sinocyclocheilus rhinocerous]	ko04310//Wnt signaling pathway//Signal transduction//Environmental Information Processing	GO:0044464//cell part;GO:0005623//cell	-	GO:0023052//signaling;GO:0007166//cell surface receptor signaling pathway;GO:0050794//regulation of cellular process;GO:0044763//single-organism cellular process;GO:0016055//Wnt signaling pathway;GO:0044767//single-organism developmental process;GO:0022603//regulation of anatomical structure morphogenesis;GO:0044700//single organism signaling;GO:0048513//animal organ development;GO:0007417//centr…
Unigene0067605	2.666666667	10.33333333	0.1615	0.3931	0.0837	0.6062	0.6574	1.3243	0.212766667	0.862633333	2.019475318	0.021251492	1	no	-	PREDICTED: dentin sialophosphoprotein-like [Astyanax mexicanus]	-	-	-	-
Unigene0022334	9.666666667	24.66666667	0.7063	0.8595	1.0065	2.0989	3.491	1.6892	0.857433333	2.426366667	1.500701174	0.021287259	1	no	-	--	-	-	-	-
Unigene0057627	19	46.33333333	1.233	0.4321	1.1757	4.0731	2.0077	1.7076	0.946933333	2.596133333	1.455029715	0.021310937	1	no	-	--	-	-	-	-
Unigene0041525	186.3333333	375	1.1427	1.0741	1.477	2.7364	1.4283	3.62	1.231266667	2.5949	1.075535689	0.021334107	1	no	prom1a	PREDICTED: prominin-1-A-like [Cyprinus carpio]	-	-	-	-
Unigene0060294	4.333333333	0.333333333	0.5193	0.5056	0.323	0	0	0.0946	0.4493	0.031533333	-3.832729474	0.021349842	1	no	-	--	-	-	-	-
Unigene0014756	4.666666667	14.66666667	0.1362	0.1989	0.6351	1.2779	0.9502	1.0546	0.3234	1.094233333	1.758528826	0.021352938	1	no	-	--	-	-	-	-
Unigene0066081	14.33333333	33.66666667	0.6754	0.9863	0.4	2.1128	1.9077	1.4066	0.687233333	1.809033333	1.396347072	0.021378272	1	no	-	--	-	-	-	-
Unigene0039302	6	18.66666667	0.4048	0.1126	0.5394	1.2301	0.6726	1.528	0.352266667	1.143566667	1.698800602	0.021382722	1	no	-	--	-	-	-	-
Unigene0024115	35.33333333	10.33333333	2.1768	0.5298	2.1622	0.7945	0.3165	0.4545	1.622933333	0.521833333	-1.63694273	0.021407209	1	no	-	--	-	-	-	-
Unigene0057022	20.66666667	48	1.1881	1.4459	0.4105	3.4689	2.7061	1.8493	1.014833333	2.674766667	1.398170231	0.021421323	1	no	-	--	-	-	-	-
Unigene0056107	22.66666667	5.333333333	3.0982	0.8757	2.9005	1.2506	0.2325	0.3642	2.291466667	0.615766667	-1.895815622	0.02142953	1	no	-	PREDICTED: protein NLRC5-like, partial [Sinocyclocheilus grahami]	-	-	-	-
Unigene0033152	4	12.33333333	0.2712	0.44	0.3748	1.3573	0.841	1.4001	0.362	1.199466667	1.728331463	0.021430303	1	no	-	--	-	-	-	-
Unigene0013804	29	62.66666667	0.8536	0.4511	0.8342	2.1361	1.3615	1.5554	0.712966667	1.684333333	1.240271146	0.021470332	1	no	-	PREDICTED: ankyrin repeat domain-containing protein 10-like isoform X1 [Sinocyclocheilus grahami]	-	-	-	-
Unigene0070857	4	0.333333333	0.5708	0.4446	0.355	0	0	0.104	0.4568	0.034666667	-3.719941623	0.021526756	1	no	LRRC39	Zgc:112088 protein, partial [Danio rerio]	-	-	-	GO:0048513//animal organ development;GO:0030036//actin cytoskeleton organization;GO:0009987//cellular process;GO:0030239//myofibril assembly;GO:0044085//cellular component biogenesis;GO:0044763//single-organism cellular process;GO:0032501//multicellular organismal process;GO:0003008//system process;GO:0072359//circulatory system development;GO:0070925//organelle assembly;GO:0032989//cellular comp…
Unigene0000516	42.33333333	87.33333333	2.433	3.5868	2.81	8.2633	4.77	6.8404	2.943266667	6.624566667	1.170407827	0.021545034	1	no	-	--	-	-	-	-
Unigene0025822	1.666666667	7.666666667	0.1238	0.3615	0.1283	1.3938	1.2955	0.5638	0.204533333	1.084366667	2.406444783	0.021563413	1	no	-	--	-	-	-	-
Unigene0064338	0.333333333	4	0	0	0.1024	0.371	0.3448	0.5403	0.034133333	0.4187	3.616663703	0.021591411	1	no	-	--	-	-	-	-
Unigene0029392	69	7.333333333	0.1318	12.8281	0.3414	0.8244	0	0.7203	4.433766667	0.5149	-3.106168673	0.02162531	1	no	IGHV3-23	immunoglobulin mu heavy chain [Ctenopharyngodon idella]	-	-	-	-
Unigene0061011	7	26.66666667	0.0965	0.0939	0.85	2.1731	0.505	1.5384	0.3468	1.4055	2.01890765	0.021662366	1	no	-	--	-	-	-	-
Unigene0013437	1	8	0	0	0.3565	1.0043	2.0002	0.2089	0.118833333	1.071133333	3.172126595	0.021679399	1	no	-	--	-	-	-	-
Unigene0017396	1.666666667	7.666666667	0.162	0.0789	0.1679	1.0135	0.471	0.5904	0.136266667	0.691633333	2.343574706	0.021679693	1	no	TY3B-G	PREDICTED: armadillo repeat-containing protein 8 [Chrysemys picta bellii]	-	-	-	-
Unigene0062387	17	3.666666667	1.1208	0.7275	0.2582	0	0.1931	0.2648	0.702166667	0.152633333	-2.201743446	0.02168858	1	no	-	PREDICTED: ankyrin repeat and MYND domain-containing protein 2-like isoform X3 [Sinocyclocheilus anshuiensis]	-	-	-	-
Unigene0068095	0.666666667	6	0.1962	0	0	0.6137	0.2282	0.9831	0.0654	0.608333333	3.217499517	0.021699387	1	no	-	--	-	-	-	-
Unigene0049453	1.333333333	7.333333333	0.3662	0.1188	0	1.5272	0.8517	0.6672	0.161666667	1.015366667	2.650906652	0.02172975	1	no	-	--	-	-	-	-
Unigene0008165	21.66666667	51	0.779	0.875	0.2795	1.2371	2.021	1.6925	0.6445	1.6502	1.356388622	0.021787347	1	no	-	--	-	-	-	-
Unigene0020021	19.66666667	5.666666667	0.9118	1.0145	0.63	0.163	0.4545	0.1978	0.8521	0.271766667	-1.648654237	0.02181733	1	no	PCDH18	PREDICTED: protocadherin-18-like [Cyprinus carpio]	-	GO:0016020//membrane;GO:0044425//membrane part;GO:0031224//intrinsic component of membrane	GO:0005488//binding	GO:0044707//single-multicellular organism process;GO:0009987//cellular process;GO:0098609//cell-cell adhesion;GO:0048856//anatomical structure development;GO:0048699//generation of neurons;GO:0048869//cellular developmental process;GO:0044699//single-organism process;GO:0044767//single-organism developmental process;GO:0007275//multicellular organism development;GO:0048666//neuron development;GO:…
Unigene0036811	18.66666667	47.66666667	0.4765	1.2757	0.4527	3.0805	1.0622	2.0984	0.734966667	2.080366667	1.501087102	0.021832228	1	no	-	--	-	-	-	-
Unigene0062775	3.333333333	12	0.43	0.3349	0.0891	0.7532	0.8001	1.6453	0.284666667	1.0662	1.905132613	0.021887723	1	no	-	--	-	-	-	-
Unigene0067998	3	0	0.2147	0.3484	0.0742	0	0	0	0.212433333	0.001	-7.73086635	0.021913996	1	no	PCDH8	PREDICTED: protocadherin-8-like [Cyprinus carpio]	-	-	-	-
Unigene0061684	0.666666667	5	0.1072	0.1044	0	0.6709	0.873	0.2931	0.070533333	0.612333333	3.117940094	0.021929637	1	no	-	PREDICTED: uncharacterized protein LOC107752693 [Sinocyclocheilus rhinocerous]	-	-	-	-
Unigene0018786	4.333333333	15.66666667	0	0.6169	0.197	1.3478	0.8843	1.0392	0.2713	1.090433333	2.006940617	0.021931837	1	no	-	--	-	-	-	-
Unigene0057198	6.666666667	0.666666667	1.5354	0.2491	0.7957	0	0	0.2332	0.860066667	0.077733333	-3.467843204	0.021976522	1	no	-	--	-	-	-	-
Unigene0025923	2.666666667	11.66666667	0	0.4217	0.0641	0.4646	0.8636	0.9585	0.161933333	0.762233333	2.234832711	0.021997517	1	no	PARP6	PREDICTED: poly [ADP-ribose] polymerase 6-like [Sinocyclocheilus anshuiensis]	-	-	GO:0016763//transferase activity, transferring pentosyl groups;GO:0016757//transferase activity, transferring glycosyl groups;GO:0016740//transferase activity;GO:0003824//catalytic activity	-
Unigene0067328	3	11	0.1655	0.1612	0.4289	1.2428	0.7701	0.9803	0.251866667	0.997733333	1.985994073	0.022069737	1	no	-	--	-	-	-	-
Unigene0015611	1	6	0	0.1194	0.2542	0.7671	0.713	0.8938	0.124533333	0.7913	2.667692803	0.022128576	1	no	-	--	-	-	-	-
Unigene0058804	0	3.666666667	0	0	0	0.5363	0	0.4686	0.001	0.334966667	8.387873726	0.02213565	1	no	-	--	-	-	-	-
Unigene0064810	1	5.666666667	0.1748	0.0851	0	0.6562	0.5083	0.4779	0.086633333	0.547466667	2.659776994	0.022144416	1	no	-	--	-	-	-	-
Unigene0047895	3	10.33333333	0.1676	0.3264	0.2606	1.2585	0.4874	1.0691	0.251533333	0.938333333	1.899350917	0.022149442	1	no	-	--	-	-	-	-
Unigene0016332	4	0.333333333	0.5093	0.3719	0.6599	0	0	0.116	0.5137	0.038666667	-3.731763769	0.022165844	1	no	-	--	-	-	-	-
Unigene0001631	21.66666667	54.33333333	1.3016	0.551	1.877	5.8066	2.0404	2.5781	1.2432	3.475033333	1.482968408	0.02217861	1	no	-	--	-	-	-	-
Unigene0016419	0	3	0	0	0	0.1601	0.2976	0.6995	0.001	0.385733333	8.591460012	0.022192021	1	no	-	--	-	-	-	-
Unigene0043592	39.33333333	87.66666667	0.498	0.8484	0.4839	0.8373	2.2623	1.3469	0.6101	1.482166667	1.280590049	0.022195003	1	no	-	--	-	-	-	-
Unigene0062245	13.33333333	2.333333333	1.8521	0.3005	0.3199	0	0.0718	0.3375	0.824166667	0.136433333	-2.594739949	0.022266137	1	no	-	--	-	-	-	-
Unigene0033307	8.333333333	25.33333333	0.4896	0.3467	0.2768	1.6152	0.3624	1.6223	0.371033333	1.199966667	1.693373622	0.022307826	1	no	-	--	-	-	-	-
Unigene0032260	2	10.33333333	0.2597	0.2528	0	0.4332	0.8053	1.4984	0.170833333	0.9123	2.416918813	0.022317779	1	no	GRIN1	PREDICTED: glutamate receptor ionotropic, NMDA 1-like [Cyprinus carpio]	ko04080//Neuroactive ligand-receptor interaction//Signaling molecules and interaction//Environmental Information Processing;ko04020//Calcium signaling pathway//Signal transduction//Environmental Information Processing	-	-	-
Unigene0017485	5	0	0.7357	0	0.1173	0	0	0	0.284333333	0.001	-8.151439431	0.022318381	1	no	-	--	-	-	-	-
Unigene0055541	5.666666667	0.333333333	0.1152	0.3363	1.5516	0	0	0.1049	0.6677	0.034966667	-4.255147863	0.022355116	1	no	-	--	-	-	-	-
Unigene0008668	14	31.66666667	0.461	0.6528	0.6515	1.8353	1.5109	1.1073	0.588433333	1.4845	1.335026214	0.022388628	1	no	-	--	-	-	-	-
Unigene0039675	18	4.333333333	2.0841	1.1836	1.4401	0.9779	0.101	0.2374	1.569266667	0.438766667	-1.838564699	0.022428952	1	no	-	unnamed protein product [Oncorhynchus mykiss]	-	-	-	-
Unigene0042042	9.666666667	30.33333333	0.1984	0.5794	2.1591	5.4613	2.6535	2.1691	0.978966667	3.427966667	1.808021438	0.022476055	1	no	-	--	-	-	-	-
Unigene0021179	4	0.333333333	0.6428	0.3755	0.533	0.1609	0	0	0.5171	0.053633333	-3.269241479	0.022499565	1	no	-	--	-	-	-	-
Unigene0018567	9.666666667	1.666666667	0.9894	0.2223	1.0255	0.1905	0	0.208	0.745733333	0.132833333	-2.489042606	0.022558207	1	no	-	--	-	-	-	-
Unigene0067729	1.333333333	9	0	0.4159	0	0.6682	0.621	1.6542	0.138633333	0.981133333	2.823175024	0.022617873	1	no	-	--	-	-	-	-
Unigene0014651	14.66666667	3	1.2039	1.3022	0.4159	0.5021	0.1556	0.0609	0.974	0.239533333	-2.023695338	0.022675696	1	no	-	hypothetical protein XENTR_v90030519mg [Xenopus tropicalis]	-	-	-	-
Unigene0032030	15.33333333	4.333333333	1.4714	2.2681	1.9063	0.6137	0.5704	0.5586	1.881933333	0.5809	-1.695853787	0.022785672	1	no	-	PREDICTED: proteoglycan 4 [Geospiza fortis]	-	-	-	-
Unigene0038507	1	6.666666667	0	0	0.3375	1.2224	0.7575	0.4945	0.1125	0.8248	2.874119331	0.022801272	1	no	-	--	-	-	-	-
Unigene0035747	172.3333333	307.3333333	2.7152	3.0126	2.1068	5.7701	4.7104	4.8512	2.611533333	5.110566667	0.96858615	0.022865727	1	no	-	--	-	-	-	-
Unigene0058792	4	12	0.1463	0.4274	0.3033	1.0986	1.0211	0.7999	0.292333333	0.9732	1.735121978	0.022868362	1	no	-	--	-	-	-	-
Unigene0023296	5	15.33333333	0.4044	0.0656	0.5588	1.0962	1.1757	1.1053	0.342933333	1.125733333	1.714865071	0.022872631	1	no	-	PREDICTED: RNA-directed DNA polymerase from mobile element jockey-like [Danio rerio]	-	-	-	-
Unigene0018266	14.33333333	34.66666667	0.4422	0.5262	1.1714	2.7053	1.6002	1.4327	0.713266667	1.912733333	1.423122294	0.022875699	1	no	-	--	-	-	-	-
Unigene0044008	5.666666667	0.666666667	0.4551	0.3544	0.7547	0	0	0.1659	0.5214	0.0553	-3.237039197	0.022885901	1	no	-	--	-	-	-	-
Unigene0059468	11	27	0.3311	0.5065	0.7353	1.7162	1.2101	1.2928	0.5243	1.406366667	1.423508331	0.022952936	1	no	-	--	-	-	-	-
Unigene0045654	1.333333333	7.666666667	0.1666	0	0.1726	0.3126	1.2592	0.5312	0.113066667	0.701	2.632240775	0.022960156	1	no	-	--	-	-	-	-
Unigene0072824	6	0.666666667	0.2207	0.5372	0.2288	0	0.1283	0	0.3289	0.042766667	-2.943090338	0.022981979	1	notest	-	PREDICTED: cytochrome c oxidase subunit 8A, mitochondrial-like [Cyprinus carpio]	ko01100//Metabolic pathways//Global and Overview//Metabolism;ko04260//Cardiac muscle contraction//Circulatory system//Organismal Systems;ko00190//Oxidative phosphorylation//Energy metabolism//Metabolism	-	-	-
Unigene0021571	17.66666667	2.666666667	3.8869	0.704	0.1874	0	0.4205	0.3294	1.592766667	0.249966667	-2.671727306	0.022997521	1	no	-	--	-	-	-	-
Unigene0001423	873.3333333	360.6666667	22.3398	13.2003	5.7559	5.2462	8.354	5.2328	13.76533333	6.277666667	-1.132739214	0.02301192	1	no	cyp26a1	PREDICTED: cytochrome P450 26A1 [Cyprinus carpio]	ko01100//Metabolic pathways//Global and Overview//Metabolism;ko00830//Retinol metabolism//Metabolism of cofactors and vitamins//Metabolism	GO:0042175//nuclear outer membrane-endoplasmic reticulum membrane network;GO:0044464//cell part;GO:0043229//intracellular organelle;GO:0043231//intracellular membrane-bounded organelle;GO:0012505//endomembrane system;GO:0043227//membrane-bounded organelle;GO:0005622//intracellular;GO:0005623//cell;GO:0044424//intracellular part;GO:0043226//organelle;GO:0016020//membrane	GO:0003824//catalytic activity;GO:0046872//metal ion binding;GO:0016491//oxidoreductase activity;GO:1901363//heterocyclic compound binding;GO:0043167//ion binding;GO:0004497//monooxygenase activity;GO:0046906//tetrapyrrole binding;GO:0043169//cation binding;GO:0005488//binding;GO:0097159//organic cyclic compound binding;GO:0046914//transition metal ion binding	GO:0006721//terpenoid metabolic process;GO:0007420//brain development;GO:0050794//regulation of cellular process;GO:0009987//cellular process;GO:0023052//signaling;GO:0010033//response to organic substance;GO:0060322//head development;GO:0050789//regulation of biological process;GO:0042221//response to chemical;GO:0044712//single-organism catabolic process;GO:0044248//cellular catabolic process;G…
Unigene0015880	4.333333333	31.66666667	0.0564	0	0.3216	2.3294	0	0.7453	0.126	1.0249	3.023987513	0.023040655	1	no	-	--	-	-	-	-
Unigene0039727	20.33333333	49	1.2357	0.8421	0.4269	1.6493	1.8683	2.8522	0.8349	2.123266667	1.34661026	0.023094139	1	no	-	--	-	-	-	-
Unigene0069501	1	6.333333333	0.1113	0.2167	0	1.5317	0.5177	0.4056	0.109333333	0.818333333	2.903955305	0.023108809	1	no	-	--	-	-	-	-
Unigene0070369	3	12	0.3766	0.4888	0.2602	4.0836	0.5839	0.6862	0.3752	1.784566667	2.249842065	0.023129572	1	no	-	--	-	-	-	-
Unigene0052925	63.66666667	258	0.2976	1.7119	0.5468	1.134	10.7764	0.2711	0.8521	4.0605	2.252562732	0.0231616	1	no	-	PREDICTED: restin homolog [Cyprinus carpio]	-	-	-	-
Unigene0055706	3554.666667	6223.666667	18.6972	11.1101	27.2702	53.5502	32.5076	25.5439	19.02583333	37.20056667	0.967364952	0.023190539	1	no	-	PREDICTED: uncharacterized protein LOC107753632 [Sinocyclocheilus rhinocerous]	-	-	-	-
Unigene0037583	1180.333333	1988.666667	14.8606	11.3856	9.4778	17.119	24.8348	22.8822	11.908	21.612	0.85990146	0.023209645	1	no	acsf2	PREDICTED: acyl-CoA synthetase family member 2, mitochondrial-like [Sinocyclocheilus rhinocerous]	-	GO:0044464//cell part;GO:0043231//intracellular membrane-bounded organelle;GO:0005623//cell;GO:0043229//intracellular organelle;GO:0043227//membrane-bounded organelle;GO:0043226//organelle;GO:0044424//intracellular part;GO:0005622//intracellular	GO:0005488//binding;GO:0001883//purine nucleoside binding;GO:0032550//purine ribonucleoside binding;GO:0032549//ribonucleoside binding;GO:0097367//carbohydrate derivative binding;GO:1901363//heterocyclic compound binding;GO:0097159//organic cyclic compound binding;GO:0003824//catalytic activity;GO:0036094//small molecule binding;GO:0001882//nucleoside binding	GO:0071704//organic substance metabolic process;GO:0008152//metabolic process;GO:0009987//cellular process;GO:0044238//primary metabolic process;GO:0044237//cellular metabolic process;GO:0044281//small molecule metabolic process;GO:0006082//organic acid metabolic process;GO:0044699//single-organism process;GO:0044763//single-organism cellular process;GO:0043436//oxoacid metabolic process;GO:00197…
Unigene0053353	4	0	0.2762	0	0.0954	0	0	0	0.123866667	0.001	-6.952644191	0.023221702	1	no	-	--	-	-	-	-
Unigene0016331	6.333333333	16.66666667	0.5045	0.4911	0.61	1.4729	1.6624	1.4555	0.5352	1.530266667	1.51563306	0.023308555	1	no	-	--	-	-	-	-
Unigene0069908	2.666666667	11	0	0.332	0.5891	2.2757	1.1898	0.8285	0.307033333	1.431333333	2.220892494	0.023322992	1	no	-	--	-	-	-	-
Unigene0044904	21.33333333	48	1.0083	0.7526	0.3832	1.8505	1.6027	1.8068	0.7147	1.753333333	1.294690605	0.023367796	1	no	-	--	-	-	-	-
Unigene0036261	6.333333333	18.66666667	1.1474	0.2793	0.3964	2.7517	2.2241	1.1325	0.6077	2.0361	1.744377222	0.02349746	1	no	-	PREDICTED: calcium/calmodulin-dependent 3',5'-cyclic nucleotide phosphodiesterase 1C-like [Sinocyclocheilus grahami]	-	-	-	-
Unigene0012393	16.33333333	4	0.5591	0.8164	2.1005	0.3498	0.3251	0.2547	1.158666667	0.309866667	-1.902746108	0.023500375	1	no	-	--	-	-	-	-
Unigene0068854	0.333333333	4	0.1243	0	0	0.3112	0.5785	0.6798	0.041433333	0.523166667	3.658406827	0.023533104	1	no	-	PREDICTED: probable G-protein coupled receptor 179 [Danio rerio]	-	-	-	-
Unigene0065614	11.66666667	2.333333333	0.6408	1.1437	1.9924	0.2673	0.4968	0.0973	1.258966667	0.287133333	-2.132447358	0.023545037	1	no	-	--	-	-	-	-
Unigene0054277	40	82.33333333	3.8256	2.9366	2.0588	5.9837	6.2462	7.3065	2.940333333	6.512133333	1.147150522	0.023563014	1	no	-	--	-	-	-	-
Unigene0059664	17	47	1.648	1.146	0.183	4.2714	1.6428	3.1639	0.992333333	3.026033333	1.608531159	0.023567928	1	no	Gvin1	PREDICTED: interferon-induced very large GTPase 1-like [Cyprinus carpio]	-	-	-	-
Unigene0042470	0.333333333	4.333333333	0	0.1057	0	0.9507	0.1262	0.4945	0.035233333	0.5238	3.894003184	0.023570163	1	no	-	--	-	-	-	-
Unigene0038656	7.666666667	25	0.0819	0.4782	0.3819	2.4074	0.4285	0.7087	0.314	1.181533333	1.911823867	0.023580102	1	no	-	--	-	-	-	-
Unigene0021022	0.333333333	4	0	0	0.0292	0.0704	0.1309	0.1539	0.009733333	0.1184	3.604591307	0.023596709	1	no	mstnb	myostatin 2 [Ctenopharyngodon idella]	-	-	GO:0005515//protein binding;GO:0005488//binding;GO:0005102//receptor binding	-
Unigene0061160	1	6	0	0.1725	0.0918	0.665	0.4121	0.6457	0.0881	0.574266667	2.704506899	0.023618623	1	no	LRRN1	PREDICTED: leucine-rich repeat neuronal protein 1-like [Sinocyclocheilus rhinocerous]	-	-	-	-
Unigene0037362	486	870.6666667	6.7522	4.7149	5.5747	8.4927	9.7216	13.9061	5.6806	10.7068	0.914412134	0.023625824	1	no	GRB14	PREDICTED: growth factor receptor-bound protein 14 isoform X1 [Danio rerio]	-	-	-	-
Unigene0055226	2.333333333	9.333333333	0.1883	0.1222	0.1301	0.9424	0.365	0.629	0.146866667	0.645466667	2.135835599	0.023630145	1	no	EPS15L1	PREDICTED: trichohyalin-like [Cyprinus carpio]	-	-	-	-
Unigene0072761	3	11.66666667	0.3462	0.4213	0	1.6245	0.5033	1.1829	0.255833333	1.103566667	2.108897631	0.023689395	1	notest	-	--	-	-	-	-
Unigene0008375	12.66666667	57.66666667	0.7684	1.0473	0.1062	0.7692	0.715	6.9547	0.640633333	2.812966667	2.134521686	0.023692924	1	no	-	--	-	-	-	-
Unigene0067357	2.333333333	10.33333333	0	0.5705	0.2429	0.8798	2.1808	0.961	0.271133333	1.340533333	2.305732698	0.023753275	1	no	-	reverse transcriptase, partial [Clarias batrachus]	-	-	-	-
Unigene0017868	33	80	0.3172	0.9881	1.8739	3.0957	3.5414	1.9074	1.059733333	2.848166667	1.426332294	0.023769838	1	no	-	--	-	-	-	-
Unigene0000851	3	11.66666667	0.1164	0.3967	0	0.6555	1.1509	0.4773	0.171033333	0.761233333	2.154061212	0.023780902	1	no	-	--	-	-	-	-
Unigene0000462	4.666666667	14.66666667	0.2951	0.6464	0.0765	1.477	1.1154	1.0083	0.339333333	1.200233333	1.822539842	0.023789135	1	no	-	--	-	-	-	-
Unigene0057087	277.3333333	116.3333333	23.9406	41.9983	30.2082	16.932	6.1875	19.6002	32.04903333	14.2399	-1.170341828	0.023791188	1	no	-	--	-	-	-	-
Unigene0041449	3.333333333	14.66666667	0.1463	0.0712	0.5308	0.4577	0.936	1.8665	0.249433333	1.086733333	2.12327179	0.023838021	1	no	-	--	-	-	-	-
Unigene0029412	6.333333333	17	0.344	0.293	0.1783	0.9684	0.7001	0.7443	0.271766667	0.804266667	1.565305414	0.023842908	1	no	-	--	-	-	-	-
Unigene0049519	65.66666667	136.6666667	4.6658	2.093	2.2757	5.7237	6.3841	7.9188	3.0115	6.675533333	1.148400845	0.023860904	1	no	-	--	-	-	-	-
Unigene0044638	12.66666667	29	1.4211	2.0124	1.473	4.5265	5.1088	2.9429	1.6355	4.192733333	1.358159315	0.023892329	1	no	-	--	-	-	-	-
Unigene0050478	3.333333333	11	0.3116	0.6067	0.1077	1.6895	1.3288	0.8517	0.342	1.29	1.915302835	0.023920515	1	no	-	--	-	-	-	-
Unigene0006788	13.66666667	32.66666667	0.965	0.6263	0.6113	1.8113	3.0554	1.0747	0.7342	1.980466667	1.4315954	0.023934609	1	no	-	--	-	-	-	-
Unigene0043918	87.33333333	164	0.9208	1.3447	0.9042	2.1982	2.1137	2.1747	1.056566667	2.1622	1.033116176	0.023939394	1	no	ZBED1	PREDICTED: zinc finger BED domain-containing protein 1-like [Austrofundulus limnaeus]	-	-	-	-
Unigene0071941	2.666666667	12.33333333	0.3662	0.3565	0.253	0.6109	0.9936	2.8913	0.325233333	1.4986	2.204068324	0.023947733	1	no	-	--	-	-	-	-
Unigene0058037	2.333333333	9.333333333	0.4255	0.2071	0.1102	1.7302	0.7422	0.8722	0.2476	1.114866667	2.170787961	0.023950128	1	no	-	--	-	-	-	-
Unigene0043745	7.333333333	19	0.373	0.5447	0.4511	1.4781	1.0123	1.3595	0.456266667	1.2833	1.491909308	0.023955681	1	no	-	--	-	-	-	-
Unigene0001718	17.33333333	5.333333333	1.6763	1.3871	1.3031	0.5244	0.3899	0.5346	1.4555	0.482966667	-1.591519314	0.023978401	1	no	-	--	-	-	-	-
Unigene0002776	13	29.33333333	0.4618	0.4174	0.4102	1.1556	1.3042	0.7813	0.4298	1.080366667	1.329783645	0.024023733	1	no	-	--	-	-	-	-
Unigene0054846	2	13	0	0.1061	0.5648	2.1821	0.1268	2.1847	0.223633333	1.497866667	2.743702059	0.024045411	1	no	-	--	-	-	-	-
Unigene0021639	4	0	0.7629	0.5305	0	0	0	0	0.431133333	0.001	-8.751990299	0.024047617	1	no	-	--	-	-	-	-
Unigene0032319	66.66666667	141.3333333	3.0658	4.9745	9.1798	19.7137	10.4988	10.3199	5.740033333	13.5108	1.234982082	0.024050804	1	no	-	--	-	-	-	-
Unigene0005968	40.66666667	12.66666667	2.3047	0.4564	2.0649	0.4888	0.7269	0.4271	1.608666667	0.5476	-1.554671063	0.024059942	1	no	-	--	-	-	-	-
Unigene0036246	4.333333333	13	0.273	0.5316	0.3773	1.936	0.8468	1.161	0.393966667	1.3146	1.738478416	0.024077895	1	no	-	--	-	-	-	-
Unigene0043799	0.333333333	3.666666667	0.1298	0	0	0.4874	0.755	0.3549	0.043266667	0.532433333	3.621273012	0.024080041	1	no	LRP8	PREDICTED: low-density lipoprotein receptor-like, partial [Cyprinus carpio]	-	-	-	-
Unigene0056838	12.66666667	29.66666667	0.9338	1.0744	1.2318	2.9741	1.9746	3.1711	1.08	2.7066	1.32545038	0.024088927	1	no	-	PREDICTED: gastrula zinc finger protein XlCGF7.1-like [Sinocyclocheilus anshuiensis]	-	-	-	-
Unigene0063359	5.666666667	16.66666667	0.3204	0.8318	0.6641	1.6036	1.4905	2.5299	0.605433333	1.874666667	1.630594081	0.024220647	1	no	-	--	-	-	-	-
Unigene0067202	1.333333333	7.666666667	0.3056	0	0.1056	0.5099	0.5924	1.2994	0.137066667	0.800566667	2.546143783	0.024261774	1	no	-	--	-	-	-	-
Unigene0001077	22	59	0.2823	0.5725	0.707	2.5311	0.4103	1.6288	0.5206	1.5234	1.549047584	0.024287522	1	no	-	PREDICTED: probable basic-leucine zipper transcription factor H [Oreochromis niloticus]	ko03460//Fanconi anemia pathway//Replication and repair//Genetic Information Processing	-	-	-
Unigene0025039	4	12.33333333	0.2635	0.5131	0.8194	1.319	1.839	2.041	0.532	1.733	1.703773504	0.024297613	1	no	-	--	-	-	-	-
Unigene0065290	11.33333333	32.33333333	0.2924	0.61	0.5196	0.4182	2.2835	1.5986	0.474	1.433433333	1.596515844	0.024309312	1	no	-	--	-	-	-	-
Unigene0026291	131	251	4.4191	4.8758	2.2291	10.9485	6.2017	7.3817	3.841333333	8.1773	1.09001741	0.024323324	1	no	-	--	-	-	-	-
Unigene0065634	1.666666667	15	0	0	0.4428	3.1002	0	1.2455	0.1476	1.448566667	3.294861456	0.024326503	1	no	-	--	-	-	-	-
Unigene0033437	177.3333333	364.6666667	4.5697	2.9137	9.9064	19.6507	11.0038	9.1483	5.7966	13.2676	1.194628583	0.024335456	1	no	-	--	-	-	-	-
Unigene0061882	1.333333333	7.333333333	0.096	0.1868	0.0995	1.2007	0.2232	0.8743	0.127433333	0.766066667	2.587727248	0.024344452	1	no	gltp	PREDICTED: glycolipid transfer protein-like [Cyprinus carpio]	-	GO:0044464//cell part;GO:0005622//intracellular;GO:0005623//cell;GO:0044424//intracellular part	GO:0005488//binding;GO:0022892//substrate-specific transporter activity;GO:0008289//lipid binding;GO:0005215//transporter activity;GO:0005319//lipid transporter activity	GO:0006869//lipid transport;GO:0051234//establishment of localization;GO:0044699//single-organism process;GO:0010876//lipid localization;GO:1902578//single-organism localization;GO:0006810//transport;GO:0071702//organic substance transport;GO:0033036//macromolecule localization;GO:0051179//localization;GO:0044765//single-organism transport
Unigene0057935	34	76	1.3798	1.6418	0.874	1.8704	5.171	2.5493	1.298533333	3.1969	1.299790568	0.024358838	1	no	-	--	-	-	-	-
Unigene0037749	10.33333333	26	0.3936	0.8759	0.4663	2.533	0.981	1.3833	0.5786	1.632433333	1.496385847	0.024414841	1	no	-	--	-	-	-	-
Unigene0009014	11.66666667	29.66666667	0.6791	0.3005	1.2158	2.2403	1.8669	1.9125	0.7318	2.006566667	1.455207769	0.024436271	1	no	-	--	-	-	-	-
Unigene0058274	3	10.66666667	0.5315	0.1725	0.0918	1.6626	1.1332	0.4842	0.265266667	1.093333333	2.043218011	0.02443933	1	no	-	ORF2-encoded protein, partial [Danio rerio]	-	-	-	-
Unigene0007103	348.6666667	625.3333333	3.3233	4.2446	3.0548	5.2521	10.7917	5.093	3.5409	7.0456	0.99260647	0.024444276	1	no	POF1B	PREDICTED: protein POF1B-like [Sinocyclocheilus rhinocerous]	-	-	-	-
Unigene0028991	5	0.333333333	0.3717	0.0905	0.9632	0	0	0.0847	0.475133333	0.028233333	-4.07286105	0.024478738	1	no	-	--	-	-	-	-
Unigene0065285	0	2.666666667	0	0	0	0.438	0.2714	0.3189	0.001	0.342766667	8.421083007	0.024501276	1	no	-	--	-	-	-	-
Unigene0057999	19.33333333	5	2.6916	0.8385	2.7898	1.0777	0.2504	0.4905	2.106633333	0.6062	-1.797073473	0.0245175	1	no	-	hypothetical protein cypCar_00043385 [Cyprinus carpio]	-	-	-	-
Unigene0052359	1.666666667	7.666666667	0.1043	0.3045	0.1081	0.6524	0.9702	0.9501	0.1723	0.857566667	2.315326128	0.02452819	1	no	-	--	-	-	-	-
Unigene0025114	3.666666667	0	0.4138	0	0.7506	0	0	0	0.388133333	0.001	-8.600408529	0.024543649	1	no	-	--	-	-	-	-
Unigene0006738	584	999	4.1355	3.9744	2.2105	6.5793	7.2147	5.6897	3.440133333	6.494566667	0.916768786	0.024572336	1	no	ENG	PREDICTED: transforming growth factor beta receptor type 3-like [Cyprinus carpio]	-	-	-	-
Unigene0047938	0	7.333333333	0	0	0	0	0	1.8434	0.001	0.614466667	9.26319094	0.024576674	1	no	-	--	-	-	-	-
Unigene0063370	0	7.333333333	0	0	0	0	0	1.5299	0.001	0.509966667	8.99425914	0.024579417	1	no	ORF1	--	-	-	-	-
Unigene0062157	0	7.333333333	0	0	0	0	0	1.4706	0.001	0.4902	8.937226674	0.024582481	1	no	ORF1	--	-	-	-	-
Unigene0019784	2.666666667	11.66666667	0.1023	0.6969	0	0.7677	2.3786	0.8385	0.2664	1.328266667	2.317878828	0.024609409	1	no	-	--	-	-	-	-
Unigene0070973	0	2.666666667	0	0	0	0.2641	0.2454	0.3846	0.001	0.298033333	8.219329887	0.024649713	1	no	-	--	-	-	-	-
Unigene0015532	2.666666667	0	0.3243	0.3157	0.2241	0	0	0	0.288033333	0.001	-8.17009197	0.024668181	1	no	-	--	-	-	-	-
Unigene0059906	2.666666667	0	0.2712	0.264	0.1874	0	0	0	0.240866667	0.001	-7.912090944	0.024672373	1	no	-	--	-	-	-	-
Unigene0073334	3.333333333	11.66666667	0.2124	0.4826	0	1.0633	0.906	0.7743	0.231666667	0.914533333	1.980985278	0.024683987	1	notest	-	PREDICTED: RNA-directed DNA polymerase from mobile element jockey-like [Larimichthys crocea]	-	-	-	-
Unigene0061563	0.666666667	7.666666667	0.1003	0.0977	0	2.3851	0	0.3656	0.066	0.9169	3.796226468	0.024748065	1	no	-	--	-	-	-	-
Unigene0065472	3.333333333	12	0.2675	0.6077	0	0.8927	1.6594	0.975	0.291733333	1.1757	2.010797836	0.024785836	1	no	-	--	-	-	-	-
Unigene0047198	12	29	0.8526	0.7782	0.2762	1.667	1.6734	1.6994	0.635666667	1.679933333	1.402061639	0.024870997	1	no	-	tripartite motif protein 25 [Rhodeus uyekii]	ko04622//RIG-I-like receptor signaling pathway//Immune system//Organismal Systems	-	-	-
Unigene0053847	2	9.666666667	0	0.2487	0.2648	1.9181	0.4952	0.4656	0.171166667	0.959633333	2.487081495	0.024882344	1	no	-	--	-	-	-	-
Unigene0016563	2.666666667	0	0.0585	0.0855	0.091	0	0	0	0.078333333	0.001	-6.291554446	0.02488428	1	no	CDX1	PREDICTED: homeobox protein CDX-1-like [Sinocyclocheilus rhinocerous]	-	GO:0044464//cell part;GO:0005622//intracellular;GO:0043229//intracellular organelle;GO:0043226//organelle;GO:0043231//intracellular membrane-bounded organelle;GO:0005623//cell;GO:0043227//membrane-bounded organelle;GO:0044424//intracellular part	GO:1901363//heterocyclic compound binding;GO:0005488//binding;GO:0044212//transcription regulatory region DNA binding;GO:0001071//nucleic acid binding transcription factor activity;GO:0003676//nucleic acid binding;GO:0097159//organic cyclic compound binding;GO:0000975//regulatory region DNA binding;GO:0003677//DNA binding;GO:0001067//regulatory region nucleic acid binding	GO:0055123//digestive system development;GO:0065007//biological regulation;GO:0044763//single-organism cellular process;GO:0007275//multicellular organism development;GO:1901576//organic substance biosynthetic process;GO:0034645//cellular macromolecule biosynthetic process;GO:0034654//nucleobase-containing compound biosynthetic process;GO:0009798//axis specification;GO:0009790//embryo development…
Unigene0025568	2.666666667	0	0.1586	0.2316	0.2466	0	0	0	0.212266667	0.001	-7.729734025	0.024888235	1	no	-	--	-	-	-	-
Unigene0061305	3	12	0.1398	0.4762	0	1.7488	0.6502	0.5094	0.205333333	0.969466667	2.239223445	0.024896267	1	no	-	--	-	-	-	-
Unigene0014738	13.33333333	33.66666667	0.513	0.437	0.3323	1.8055	0.4848	1.2562	0.427433333	1.182166667	1.467662121	0.024901447	1	no	FGL2	PREDICTED: fibroleukin-like [Cyprinus carpio]	-	-	-	-
Unigene0029950	317.6666667	566.3333333	2.6122	3.7557	1.8378	6.3315	4.2654	5.4379	2.735233333	5.344933333	0.966508044	0.024908809	1	no	-	--	-	-	-	-
Unigene0072802	5	19.66666667	0.6791	0	0.4693	2.266	0.4388	2.0625	0.3828	1.5891	2.05354718	0.024918473	1	notest	-	--	-	-	-	-
Unigene0053207	0	3.333333333	0	0	0	0.9653	0.5981	0	0.001	0.521133333	9.025508727	0.024930647	1	no	Trim16	PREDICTED: tripartite motif-containing protein 16-like [Sinocyclocheilus anshuiensis]	-	-	-	-
Unigene0018026	32.33333333	3.666666667	0	2.5545	1.4023	0	0	0.4109	1.318933333	0.136966667	-3.267474909	0.024999612	1	no	-	--	-	-	-	-
Unigene0012860	4.666666667	0.333333333	0.0748	0.3642	0.6204	0	0	0.0682	0.353133333	0.022733333	-3.957331864	0.025005195	1	no	-	--	-	-	-	-
Unigene0051036	4.666666667	15	0.4635	0.1289	0.3431	1.9056	0.462	0.9653	0.311833333	1.110966667	1.832968473	0.02501243	1	no	-	--	-	-	-	-
Unigene0068033	9.333333333	23.66666667	0.5923	0.2883	0.307	1.5353	1.181	0.6939	0.395866667	1.136733333	1.521807354	0.025026753	1	no	-	--	-	-	-	-
Unigene0005424	14.33333333	45.33333333	0.211	0.6575	0.0219	1.4524	1.4727	0.4038	0.2968	1.109633333	1.902520035	0.025064855	1	no	Cd209d	PREDICTED: C-type lectin domain family 4 member G-like [Cyprinus carpio]	-	-	-	-
Unigene0054154	441	798.6666667	3.7914	2.6973	1.5303	5.3067	4.6286	5.7741	2.673	5.236466667	0.970133836	0.025116768	1	no	myrip	PREDICTED: rab effector MyRIP-like isoform X4 [Sinocyclocheilus rhinocerous]	-	-	-	GO:0033036//macromolecule localization;GO:0015031//protein transport;GO:0051234//establishment of localization;GO:0045184//establishment of protein localization;GO:0006810//transport;GO:0008104//protein localization;GO:0051179//localization;GO:0071702//organic substance transport
Unigene0000862	71.33333333	151	2.3497	2.4853	1.353	5.7714	2.3617	5.9205	2.062666667	4.684533333	1.18339464	0.025169873	1	no	-	--	-	-	-	-
Unigene0071861	2.666666667	10	0.1449	0.1411	0	0.544	0.5057	0.1981	0.095333333	0.415933333	2.125299662	0.025178174	1	no	-	hypothetical protein M91_19680, partial [Bos mutus]	-	-	-	-
Unigene0020778	11.66666667	2.666666667	0.5696	0.1386	0.5535	0.0445	0.1242	0.1297	0.420566667	0.099466667	-2.080049474	0.025185253	1	no	TRIM35	PREDICTED: nuclear factor 7, brain-like [Sinocyclocheilus rhinocerous]	-	-	-	-
Unigene0027179	82.66666667	20.33333333	3.8852	0.3552	0.2836	0.3652	0.2758	0.5318	1.508	0.390933333	-1.947641921	0.025250407	1	no	Pglyrp2	peptidoglycan recognition protein 6 [Ctenopharyngodon idella]	-	-	GO:0016787//hydrolase activity;GO:0043169//cation binding;GO:0003824//catalytic activity;GO:0043167//ion binding;GO:0016810//hydrolase activity, acting on carbon-nitrogen (but not peptide) bonds;GO:0046872//metal ion binding;GO:0005488//binding;GO:0016811//hydrolase activity, acting on carbon-nitrogen (but not peptide) bonds, in linear amides;GO:0046914//transition metal ion binding	GO:0009605//response to external stimulus;GO:1901135//carbohydrate derivative metabolic process;GO:0051704//multi-organism process;GO:0000270//peptidoglycan metabolic process;GO:0006022//aminoglycan metabolic process;GO:0051707//response to other organism;GO:0008152//metabolic process;GO:0006807//nitrogen compound metabolic process;GO:0050896//response to stimulus;GO:0071704//organic substance me…
Unigene0035091	93	183.3333333	0.6727	1.6858	1.1104	3.3514	1.9705	2.2588	1.1563	2.5269	1.127852821	0.025321621	1	no	-	--	-	-	-	-
Unigene0058612	16.33333333	5	1.7111	1.1589	0.7711	0.3724	0.3461	0.4745	1.2137	0.397666667	-1.609780321	0.025332449	1	no	-	PREDICTED: uncharacterized protein LOC103378934 [Cynoglossus semilaevis]	-	-	-	-
Unigene0026966	34	11	0.8821	1.1525	0.3128	0.2033	0.162	0.423	0.782466667	0.262766667	-1.57424702	0.025372873	1	no	-	--	-	-	-	-
Unigene0013695	4.666666667	0	1.1993	0	0.2072	0	0	0	0.468833333	0.001	-8.872931337	0.025407992	1	no	-	PREDICTED: probable C-mannosyltransferase DPY19L3 isoform X1 [Danio rerio]	-	-	-	-
Unigene0035777	1.333333333	7.666666667	0	0.4061	0	1.3047	0.9702	0.475	0.135366667	0.916633333	2.759472224	0.025414551	1	no	-	--	-	-	-	-
Unigene0019817	0	4.666666667	0	0	0	0	0.7375	0.0444	0.001	0.260633333	8.025877797	0.025430518	1	no	Slc22a7	PREDICTED: solute carrier family 22 member 7-like [Sinocyclocheilus anshuiensis]	-	-	GO:0005215//transporter activity	GO:0044763//single-organism cellular process;GO:0044699//single-organism process;GO:0009987//cellular process
Unigene0042749	2.666666667	10	0.251	0.611	0.1301	2.0418	0.5839	1.4868	0.3307	1.370833333	2.051458227	0.025513173	1	no	-	--	-	-	-	-
Unigene0021346	2	8	0.1827	0.0889	0.284	0.6857	0.8497	0.8321	0.1852	0.789166667	2.091245921	0.025558323	1	no	-	--	-	-	-	-
Unigene0018664	5	18	0.5655	0	0.1465	0.7076	1.3702	0.73	0.237333333	0.935933333	1.97949103	0.025573013	1	no	-	--	-	-	-	-
Unigene0020563	4	14.66666667	0.0593	0.4615	0.1842	0.9638	1.7917	0.2699	0.235	1.008466667	2.101430737	0.02559459	1	no	TMEM132E	PREDICTED: transmembrane protein 132A [Danio rerio]	-	-	-	-
Unigene0013247	2.666666667	9.333333333	0.2965	0.1924	0.3073	1.1129	1.2643	0.7203	0.2654	1.0325	1.959901506	0.025616197	1	no	-	--	-	-	-	-
Unigene0059234	260	476.3333333	1.2745	1.1445	0.7952	1.5329	2.1108	2.6007	1.0714	2.081466667	0.958103254	0.025619827	1	no	ADAMTS7	PREDICTED: A disintegrin and metalloproteinase with thrombospondin motifs 7-like [Sinocyclocheilus rhinocerous]	-	-	-	-
Unigene0015057	3	13.33333333	0.3367	0.1093	0.5816	4.0723	0.9137	0.409	0.342533333	1.798333333	2.392344164	0.025680916	1	no	-	--	-	-	-	-
Unigene0016510	0.333333333	4.666666667	0.1055	0	0	0.3961	0.1227	0.9614	0.035166667	0.4934	3.810477217	0.025691353	1	no	-	--	-	-	-	-
Unigene0018673	9.333333333	1.333333333	1.355	1.0794	1.0214	0.6166	0	0	1.151933333	0.205533333	-2.486612931	0.025695908	1	no	-	--	-	-	-	-
Unigene0060276	2	12	0	0.3088	0	1.323	0.1844	0.6262	0.102933333	0.7112	2.788545072	0.025716256	1	no	-	reverse transcriptase, partial [Clarias batrachus]	-	-	-	-
Unigene0010959	81.33333333	162.6666667	4.6941	2.3479	3.5262	5.9275	7.4629	8.9855	3.522733333	7.458633333	1.082216037	0.025732757	1	no	-	--	-	-	-	-
Unigene0065585	8	1.333333333	0.9022	0.3764	0.2672	0.1613	0	0.1174	0.515266667	0.0929	-2.471568764	0.025762479	1	no	-	--	-	-	-	-
Unigene0035160	17	40.66666667	2.6851	1.0694	2.5301	8.2469	6.5297	2.4465	2.094866667	5.741033333	1.454452009	0.025770495	1	no	-	--	-	-	-	-
Unigene0002472	8	20.66666667	0.4893	0.5955	0.3804	1.7603	0.9248	1.449	0.4884	1.378033333	1.49647568	0.025789842	1	no	-	--	-	-	-	-
Unigene0020682	6.333333333	17.66666667	0.5357	0.3477	0.2468	1.415	1.6613	0.5423	0.376733333	1.2062	1.678853547	0.025791179	1	no	-	PREDICTED: RNA-directed DNA polymerase from mobile element jockey-like, partial [Larimichthys crocea]	-	-	-	-
Unigene0007856	18	39.33333333	0.7579	0.8543	0.5374	1.7968	1.3917	1.8898	0.716533333	1.692766667	1.240277398	0.025792583	1	no	-	--	-	-	-	-
Unigene0036680	1.333333333	8.333333333	0.0233	0.0227	0.0482	0.0291	0.4331	0.1696	0.0314	0.2106	2.745668972	0.025796079	1	no	-	--	-	-	-	-
Unigene0064011	18	39.66666667	0.4677	0.4269	0.6969	1.5363	1.054	1.2252	0.5305	1.271833333	1.26148497	0.02582956	1	no	-	--	-	-	-	-
Unigene0008380	14.66666667	36.33333333	0.9912	0.2316	0.5342	1.3891	2.1212	1.2644	0.585666667	1.591566667	1.442295898	0.025844594	1	no	-	PREDICTED: J domain-containing protein DDB_G0295729-like [Cyprinus carpio]	-	-	-	-
Unigene0056233	5	0.333333333	0.3784	0.663	0.0784	0.0947	0	0	0.373266667	0.031566667	-3.563732849	0.025871236	1	no	cd276	PREDICTED: CXADR-like membrane protein [Cyprinus carpio]	-	-	-	-
Unigene0003736	9.333333333	22.33333333	0.8648	1.4734	0.6723	3.3817	2.3888	2.2654	1.0035	2.678633333	1.416456494	0.025912085	1	no	-	--	-	-	-	-
Unigene0046583	47.33333333	100	1.3321	0.8391	0.6091	1.8629	1.6632	2.6952	0.926766667	2.073766667	1.161975516	0.025930426	1	no	-	PREDICTED: uncharacterized protein LOC109094590 isoform X1 [Cyprinus carpio]	-	-	-	-
Unigene0006243	49.66666667	97	1.209	1.8613	1.1074	3.1663	2.7795	2.9716	1.392566667	2.972466667	1.093914236	0.025932839	1	no	-	--	-	-	-	-
Unigene0044556	11	2.666666667	1.1202	0.4674	1.0781	0.2002	0.0931	0.3645	0.888566667	0.219266667	-2.018793514	0.025933122	1	no	-	--	-	-	-	-
Unigene0037935	7.333333333	22	0.1923	0.7487	0.0996	1.2029	1.0063	1.2263	0.346866667	1.145166667	1.723104471	0.025982841	1	no	-	--	-	-	-	-
Unigene0070124	8.666666667	1	0.3866	1.3175	0.8015	0.3629	0	0	0.8352	0.120966667	-2.787512156	0.025995096	1	no	-	PREDICTED: uncharacterized protein LOC107386654 isoform X2 [Nothobranchius furzeri]	-	-	-	-
Unigene0005783	4	13.66666667	0.2443	0.1359	0.0362	0.262	0.5682	0.6677	0.1388	0.4993	1.846899339	0.026069362	1	no	-	--	-	-	-	-
Unigene0059080	6.333333333	17	1.1685	0.5056	0.8074	3.4115	2.2649	1.7744	0.827166667	2.4836	1.586182883	0.026094929	1	no	-	--	-	-	-	-
Unigene0043237	23	57	0.3985	0.7241	0.7159	1.529	0.7415	2.4446	0.612833333	1.5717	1.358759192	0.026173664	1	no	Mybpc2	PREDICTED: myosin-binding protein C, cardiac-type isoform X4 [Danio rerio]	-	-	-	GO:0003206//cardiac chamber morphogenesis;GO:0044767//single-organism developmental process;GO:0009653//anatomical structure morphogenesis;GO:0032501//multicellular organismal process;GO:0007275//multicellular organism development;GO:0048513//animal organ development;GO:0048731//system development;GO:0044707//single-multicellular organism process;GO:0044699//single-organism process;GO:0048856//an…
Unigene0012243	3.333333333	10.33333333	0.2048	0.2658	0.2123	1.025	0.9527	0.4354	0.227633333	0.804366667	1.821141464	0.026183563	1	no	-	--	-	-	-	-
Unigene0063217	1	6	0.097	0.0944	0.1006	1.2139	0.3385	0.442	0.097333333	0.6648	2.771914514	0.026228507	1	no	-	--	-	-	-	-
Unigene0024588	9	25.66666667	0.5173	0.2518	0.6434	2.5244	0.5415	1.3668	0.470833333	1.477566667	1.649934858	0.02628213	1	no	-	--	-	-	-	-
Unigene0018338	5.333333333	17	0.5795	0.0564	0.3003	1.2328	0.674	1.2673	0.312066667	1.058033333	1.761458911	0.026314772	1	no	-	PREDICTED: LOW QUALITY PROTEIN: nuclear anchorage protein 1-like [Sinocyclocheilus grahami]	-	-	-	-
Unigene0062902	2.666666667	10	0.3473	0.3382	0	1.0866	1.5149	0.3956	0.2285	0.999033333	2.12833865	0.026415665	1	no	CCL24	PREDICTED: monocyte chemotactic protein 1B-like [Sinocyclocheilus rhinocerous]	ko04060//Cytokine-cytokine receptor interaction//Signaling molecules and interaction//Environmental Information Processing;ko04062//Chemokine signaling pathway//Immune system//Organismal Systems	-	-	-
Unigene0014807	4	13	0.2471	0.2405	0.1024	0.7419	0.3448	0.9454	0.196666667	0.677366667	1.78418454	0.026456966	1	no	-	--	-	-	-	-
Unigene0060138	9.333333333	0.666666667	1.3214	0	0.2977	0.1438	0	0	0.5397	0.047933333	-3.493056512	0.026469787	1	no	-	PREDICTED: sterile alpha motif domain-containing protein 3-like isoform X1 [Cyprinus carpio]	-	-	-	-
Unigene0026013	1.333333333	7	0.2965	0	0.1024	1.1129	0.4597	0.7203	0.132966667	0.7643	2.523074408	0.026471385	1	no	-	--	-	-	-	-
Unigene0063277	5.666666667	0.666666667	0.3297	0.321	1.253	0.1375	0	0.1001	0.634566667	0.0792	-3.002199404	0.026481886	1	no	-	--	-	-	-	-
Unigene0066640	6.333333333	0.666666667	0.382	0.2479	1.8477	0	0.1481	0.116	0.825866667	0.088033333	-3.229787082	0.026486397	1	no	-	--	-	-	-	-
Unigene0051806	22	49.33333333	1.7657	1.719	2.0915	7.9958	2.6403	3.4474	1.858733333	4.6945	1.336651702	0.026488281	1	no	-	--	-	-	-	-
Unigene0071646	1.666666667	8	0.0763	0.2972	0	0.6685	0.8877	0.4868	0.1245	0.681	2.451509056	0.02650385	1	no	-	PREDICTED: FERM, RhoGEF and pleckstrin domain-containing protein 1-like [Sinocyclocheilus rhinocerous]	-	-	-	-
Unigene0012196	5.333333333	18.33333333	0.243	0.6505	0.063	0.5321	1.4836	1.4944	0.318833333	1.170033333	1.875675259	0.02652423	1	no	-	--	-	-	-	-
Unigene0064711	15	1.333333333	2.5942	0.1175	0	0	0	0.2199	0.9039	0.0733	-3.62427807	0.026530355	1	no	-	--	-	-	-	-
Unigene0012428	10	23.66666667	0.6591	0.525	0.6211	1.7245	1.5332	1.4195	0.601733333	1.559066667	1.373486437	0.026531111	1	no	-	PREDICTED: high mobility group protein B1-like isoform X1 [Scleropages formosus]	-	-	-	-
Unigene0051683	5.666666667	0.666666667	0.7847	0.191	0.7117	0.1227	0	0.0894	0.562466667	0.0707	-2.991985481	0.026567295	1	no	-	--	-	-	-	-
Unigene0001126	10.33333333	24.33333333	0.4885	0.6869	0.5063	1.5619	2.0199	0.8901	0.560566667	1.490633333	1.410967562	0.026576338	1	no	-	PREDICTED: uncharacterized protein LOC109091437 isoform X3 [Cyprinus carpio]	-	-	-	-
Unigene0010250	5.666666667	30.66666667	0	0.4135	0	0.9379	1.6273	0.1366	0.137833333	0.9006	2.707961649	0.026578915	1	no	LINGO2	toll-like receptor 22 [Ctenopharyngodon idella]	-	GO:0031224//intrinsic component of membrane;GO:0044425//membrane part;GO:0016021//integral component of membrane;GO:0016020//membrane	GO:0004871//signal transducer activity;GO:0008329//signaling pattern recognition receptor activity;GO:0038023//signaling receptor activity;GO:0038187//pattern recognition receptor activity;GO:0060089//molecular transducer activity;GO:0004872//receptor activity	GO:0051707//response to other organism;GO:0050896//response to stimulus;GO:0031347//regulation of defense response;GO:0044699//single-organism process;GO:0044003//modification by symbiont of host morphology or physiology;GO:0050794//regulation of cellular process;GO:0045088//regulation of innate immune response;GO:0051701//interaction with host;GO:0052166//positive regulation by symbiont of host …
Unigene0067608	2.666666667	10.33333333	0	0.5525	0.1961	1.5387	0.6601	1.0342	0.249533333	1.077666667	2.110606554	0.026595037	1	no	-	--	-	-	-	-
Unigene0059292	0.333333333	5.666666667	0	0	0.0897	0.6498	0	0.8675	0.0299	0.505766667	4.080254568	0.026612606	1	no	-	--	-	-	-	-
Unigene0007164	48.33333333	92.66666667	0.564	0.5377	0.6089	1.2792	1.4076	0.9421	0.5702	1.209633333	1.085029857	0.026624739	1	no	-	--	-	-	-	-
Unigene0025301	18.66666667	6	0.6363	0.542	1.0717	0.199	0.185	0.3623	0.75	0.248766667	-1.59209741	0.026626173	1	no	-	--	-	-	-	-
Unigene0015059	211	387.6666667	8.2799	8.5776	17.1088	28.7571	22.5931	17.6029	11.3221	22.98436667	1.021511342	0.026644175	1	no	-	--	-	-	-	-
Unigene0023428	6.666666667	1	0.3092	0.7023	1.0681	0.129	0	0.1878	0.6932	0.1056	-2.71466182	0.026767233	1	no	-	--	-	-	-	-
Unigene0046122	4	13.33333333	0.3815	0.2653	0	1.0229	0.824	0.5958	0.2156	0.814233333	1.917085106	0.026785273	1	no	-	PREDICTED: anoctamin-5 isoform X1 [Danio rerio]	-	-	-	-
Unigene0057770	8	20.66666667	0.8255	0.2679	0.5704	1.7216	1.7602	1.2536	0.5546	1.578466667	1.509004273	0.026793239	1	no	-	--	-	-	-	-
Unigene0019844	13	30.33333333	0.3615	0.3199	0.6131	0.9868	0.9172	1.2874	0.4315	1.0638	1.301794478	0.026857591	1	no	-	PREDICTED: inositol hexakisphosphate and diphosphoinositol-pentakisphosphate kinase 2-like [Cyprinus carpio]	-	-	-	-
Unigene0008472	25.33333333	58.33333333	0.3715	0.6148	0.4235	0.8134	0.8424	1.7092	0.469933333	1.121666667	1.255115994	0.026887731	1	no	chst1	PREDICTED: carbohydrate sulfotransferase 1-like [Cyprinus carpio]	ko00533//Glycosaminoglycan biosynthesis - keratan sulfate//Glycan biosynthesis and metabolism//Metabolism	GO:0043229//intracellular organelle;GO:0005737//cytoplasm;GO:0044431//Golgi apparatus part;GO:0044464//cell part;GO:0043226//organelle;GO:0005622//intracellular;GO:0044422//organelle part;GO:0043227//membrane-bounded organelle;GO:0044444//cytoplasmic part;GO:0005794//Golgi apparatus;GO:0043231//intracellular membrane-bounded organelle;GO:0044424//intracellular part;GO:0012505//endomembrane system…	GO:0003824//catalytic activity	GO:0008152//metabolic process;GO:0044238//primary metabolic process
Unigene0022000	2.333333333	9.333333333	0.0812	0.3955	0.0842	0.9149	0.9449	0.6662	0.186966667	0.842	2.171039151	0.02688951	1	no	-	--	-	-	-	-
Unigene0063758	3.666666667	11	0.181	0.3524	0.1251	0.8304	0.842	0.5497	0.2195	0.7407	1.754668397	0.026890422	1	no	-	--	-	-	-	-
Unigene0007534	1.333333333	6.666666667	0.1064	0.3107	0	0.6655	0.9897	0.6784	0.139033333	0.777866667	2.484092074	0.026896956	1	no	-	--	-	-	-	-
Unigene0010823	2094.333333	3504.666667	46.4721	53.8912	28.3676	58.3559	94.6096	80.3758	42.9103	77.78043333	0.858083285	0.026905596	1	no	AHNAK	PREDICTED: neuroblast differentiation-associated protein AHNAK isoform X6 [Sinocyclocheilus rhinocerous]	-	-	-	-
Unigene0018809	2.333333333	10.33333333	0	0.0712	0.455	1.1901	0.6807	0.6666	0.1754	0.8458	2.269667813	0.026911233	1	no	Mep1b	PREDICTED: meprin A subunit beta-like [Sinocyclocheilus rhinocerous]	-	-	-	-
Unigene0014061	2.666666667	0	0.4974	0.2421	0.2578	0	0	0	0.332433333	0.001	-8.376921239	0.026924493	1	no	-	--	-	-	-	-
Unigene0046755	2.666666667	0	0.3172	0.1544	0.1644	0	0	0	0.212	0.001	-7.727920455	0.026926306	1	no	ucma	unique cartilage matrix-associated protein precursor [Danio rerio]	-	-	-	-
Unigene0017638	5.666666667	17.33333333	0.6159	0.4497	0.2394	1.2524	0.7164	2.1746	0.435	1.381133333	1.666765297	0.026942309	1	no	-	--	-	-	-	-
Unigene0068469	3.666666667	0	1.0285	0	0.3998	0	0	0	0.4761	0.001	-8.895120819	0.026946132	1	no	-	--	-	-	-	-
Unigene0053166	43	113.6666667	3.7303	1.9066	6.5728	13.8863	21.2585	2.2092	4.0699	12.45133333	1.613234987	0.02695687	1	no	-	--	-	-	-	-
Unigene0005524	11.33333333	1.666666667	1.2464	0.455	0.9689	0.4874	0	0	0.8901	0.162466667	-2.453823677	0.026988651	1	no	SLC35F2	PREDICTED: solute carrier family 35 member F2-like [Cyprinus carpio]	-	-	-	-
Unigene0029905	29	9.333333333	0.4128	0.4823	0.5477	0.0207	0.1536	0.2858	0.480933333	0.153366667	-1.648851967	0.027001204	1	no	EPHA8	PREDICTED: ephrin type-A receptor 8-like [Sinocyclocheilus rhinocerous]	-	-	-	-
Unigene0055604	52.33333333	113	1.2307	0.8627	1.8114	4.9587	1.5745	2.7585	1.3016	3.097233333	1.250693918	0.027049055	1	no	-	--	-	-	-	-
Unigene0058895	55	7.333333333	0.0425	3.3344	0.0441	0.0532	0.099	0.3101	1.140333333	0.1541	-2.887516836	0.027049739	1	no	FBN2	PREDICTED: fibrillin-2-like [Sinocyclocheilus rhinocerous]	-	-	-	-
Unigene0058899	1048	1932.666667	52.3879	173.7855	76.823	175.0491	232.0954	203.217	100.9988	203.4538333	1.010363311	0.027099806	1	no	-	--	-	-	-	-
Unigene0056158	32.66666667	10.33333333	1.7615	1.1024	3.3906	0.1574	0.878	0.9744	2.084833333	0.669933333	-1.637842614	0.027102728	1	no	-	--	-	-	-	-
Unigene0040397	2.666666667	9.666666667	0.5271	0.1283	0.4097	1.319	1.226	1.5607	0.355033333	1.368566667	1.946639326	0.027130318	1	no	-	--	-	-	-	-
Unigene0070845	3	0	0.1059	0.2063	0.6588	0	0	0	0.323666667	0.001	-8.338364985	0.027180254	1	no	-	--	-	-	-	-
Unigene0027725	44	89	1.7151	2.5241	0.9922	4.0427	4.3143	3.3799	1.7438	3.9123	1.165782418	0.027201764	1	no	-	--	-	-	-	-
Unigene0045529	30	61.33333333	0.9305	1.2941	0.7577	1.9543	2.5122	2.18	0.9941	2.2155	1.156169437	0.027223817	1	no	-	--	-	-	-	-
Unigene0047684	5.666666667	15.66666667	0.228	0.259	0.1575	0.4279	0.7513	0.7271	0.214833333	0.635433333	1.564522915	0.027230196	1	no	-	--	-	-	-	-
Unigene0030392	567	1198.666667	12.6538	10.3332	5.1224	15.6675	10.6278	34.603	9.3698	20.29943333	1.115349296	0.027282901	1	no	AQP3	PREDICTED: aquaporin-3-like [Sinocyclocheilus anshuiensis]	-	GO:0044425//membrane part;GO:0031224//intrinsic component of membrane;GO:0016020//membrane	GO:0008509//anion transmembrane transporter activity;GO:1901476//carbohydrate transporter activity;GO:0015103//inorganic anion transmembrane transporter activity;GO:0005215//transporter activity;GO:0022892//substrate-specific transporter activity;GO:0022891//substrate-specific transmembrane transporter activity;GO:0022857//transmembrane transporter activity;GO:0015075//ion transmembrane transport…	GO:0044699//single-organism process;GO:0051234//establishment of localization;GO:0042044//fluid transport;GO:0006811//ion transport;GO:1902578//single-organism localization;GO:0006820//anion transport;GO:0006810//transport;GO:0051179//localization;GO:0008643//carbohydrate transport;GO:0044765//single-organism transport;GO:0071702//organic substance transport;GO:0019755//one-carbon compound transp…
Unigene0006413	5.333333333	14.33333333	0.5405	0.3007	0.4002	1.5459	1.3471	0.8442	0.4138	1.245733333	1.589989722	0.02728847	1	no	-	--	-	-	-	-
Unigene0042569	197.6666667	366	1.3336	1.268	2.0613	2.1664	4.127	2.9916	1.5543	3.095	0.99367442	0.027308241	1	no	RYR2	PREDICTED: ryanodine receptor 2 [Danio rerio]	ko04020//Calcium signaling pathway//Signal transduction//Environmental Information Processing;ko04261//Adrenergic signaling in cardiomyocytes//Circulatory system//Organismal Systems;ko04260//Cardiac muscle contraction//Circulatory system//Organismal Systems	-	-	-
Unigene0055085	4	13.33333333	0.3265	0.1589	0	0.6128	0.6645	0.5206	0.1618	0.5993	1.889066766	0.027335448	1	no	-	--	-	-	-	-
Unigene0037355	2.666666667	0	0.0367	0.0358	0.0761	0	0	0	0.049533333	0.001	-5.630327805	0.02737582	1	no	KCNMB2	PREDICTED: calcium-activated potassium channel subunit beta-2-like isoform X2 [Cyprinus carpio]	ko04270//Vascular smooth muscle contraction//Circulatory system//Organismal Systems	-	-	-
Unigene0053194	9	23.66666667	0.9392	0.3657	1.2655	1.7628	3.0585	2.396	0.8568	2.405766667	1.489466338	0.027391796	1	no	-	--	-	-	-	-
Unigene0061916	3	9.333333333	0.2057	0.1502	0.1066	0.5792	0.5383	0.4686	0.154166667	0.5287	1.777958462	0.027398252	1	no	-	--	-	-	-	-
Unigene0015013	6.666666667	0.666666667	1.5134	0.5262	0.112	0	0.1257	0.0985	0.7172	0.074733333	-3.262551711	0.027447015	1	no	TNS1	PREDICTED: tensin-like [Sinocyclocheilus anshuiensis]	-	-	-	-
Unigene0043860	1.333333333	8.666666667	0.2365	0.2302	0	0.2959	0.6876	2.0469	0.155566667	1.010133333	2.698940864	0.027455539	1	no	-	--	-	-	-	-
Unigene0030684	26.33333333	7.333333333	1.9922	3.6509	3.644	1.4664	0	1.2813	3.0957	0.9159	-1.757003673	0.027456121	1	no	-	--	-	-	-	-
Unigene0067006	0	2.666666667	0	0	0	0.2473	0.4597	0.1801	0.001	0.2957	8.207990433	0.027526331	1	no	-	--	-	-	-	-
Unigene0069391	7.666666667	1.333333333	1.1162	0.6915	0.5259	0.3809	0	0.0925	0.777866667	0.1578	-2.30142568	0.027541735	1	no	-	--	-	-	-	-
Unigene0067060	0	3.333333333	0	0	0	0.5198	0	0.5678	0.001	0.362533333	8.50196984	0.027561566	1	no	-	--	-	-	-	-
Unigene0066748	0	3.333333333	0	0	0	0.6224	0	0.6798	0.001	0.434066667	8.761772828	0.027562472	1	no	-	PREDICTED: uncharacterized protein LOC107679055 [Sinocyclocheilus anshuiensis]	-	-	-	-
Unigene0008801	9	1.333333333	0.7649	0.2327	0.2973	0	0.2224	0	0.431633333	0.074133333	-2.541611995	0.027571366	1	no	-	--	-	-	-	-
Unigene0067492	0	3.333333333	0	0	0	1.1261	0	0.3514	0.001	0.4925	8.943979914	0.027589429	1	no	-	--	-	-	-	-
Unigene0065142	0	6.666666667	0	0	0	0	0	1.6875	0.001	0.5625	9.135709286	0.027591067	1	no	-	--	-	-	-	-
Unigene0034669	63.33333333	21.33333333	1.4215	2.2215	3.5283	1.6383	0.4351	0.6476	2.390433333	0.907	-1.398097715	0.027634935	1	no	-	--	-	-	-	-
Unigene0008961	125.6666667	23.33333333	8.365	0.29	0.7204	0.0621	1.097	0.6785	3.125133333	0.612533333	-2.351057482	0.027635125	1	no	endoua	PREDICTED: poly(U)-specific endoribonuclease-A-like isoform X1 [Cyprinus carpio]	-	-	GO:0003824//catalytic activity;GO:0043169//cation binding;GO:0005488//binding;GO:0016788//hydrolase activity, acting on ester bonds;GO:0004518//nuclease activity;GO:0003676//nucleic acid binding;GO:0016787//hydrolase activity;GO:0097159//organic cyclic compound binding;GO:0004519//endonuclease activity;GO:0043167//ion binding;GO:1901363//heterocyclic compound binding	GO:0071704//organic substance metabolic process;GO:0006807//nitrogen compound metabolic process;GO:0046483//heterocycle metabolic process;GO:0006139//nucleobase-containing compound metabolic process;GO:0008152//metabolic process;GO:0090304//nucleic acid metabolic process;GO:1901360//organic cyclic compound metabolic process;GO:0044237//cellular metabolic process;GO:0016070//RNA metabolic process;…
Unigene0029209	11	2.666666667	1.7657	0.4775	1.0167	0.3682	0.2282	0.2681	1.086633333	0.288166667	-1.91488984	0.027639711	1	no	-	--	-	-	-	-
Unigene0034894	18.33333333	43	1.9498	1.3446	1.1789	3.4564	2.1732	5.3296	1.4911	3.653066667	1.292731068	0.027640475	1	no	-	--	-	-	-	-
Unigene0065473	10.66666667	1.666666667	1.2071	0.2074	0.8831	0.2665	0.1652	0	0.765866667	0.1439	-2.412026656	0.027652267	1	no	-	--	-	-	-	-
Unigene0004467	31	81.66666667	0.8841	1.684	0.9961	5.82	0.6706	3.8176	1.188066667	3.436066667	1.532142235	0.027663075	1	no	LYG2	PREDICTED: lysozyme g [Sinocyclocheilus rhinocerous]	-	-	GO:0003824//catalytic activity;GO:0016798//hydrolase activity, acting on glycosyl bonds;GO:0016787//hydrolase activity;GO:0004553//hydrolase activity, hydrolyzing O-glycosyl compounds	GO:1901564//organonitrogen compound metabolic process;GO:0044260//cellular macromolecule metabolic process;GO:0071554//cell wall organization or biogenesis;GO:1901135//carbohydrate derivative metabolic process;GO:0071704//organic substance metabolic process;GO:0000270//peptidoglycan metabolic process;GO:0043170//macromolecule metabolic process;GO:0044237//cellular metabolic process;GO:0006807//ni…
Unigene0027566	0	7	0	0	0	0	0	1.9123	0.001	0.637433333	9.316130654	0.02769599	1	no	ORF2	--	-	-	-	-
Unigene0061940	0	7	0	0	0	0	0	1.5787	0.001	0.526233333	9.039558826	0.027699317	1	no	-	PREDICTED: caspase-2-like [Cyprinus carpio]	-	-	-	-
Unigene0034160	110	213.3333333	1.8841	3.7937	1.3315	6.0012	4.806	4.3503	2.336433333	5.0525	1.112689544	0.027731723	1	no	c3	PREDICTED: complement C3-like [Cyprinus carpio]	ko04145//Phagosome//Transport and catabolism//Cellular Processes	-	-	-
Unigene0022735	4	0	0.3746	0	0.0777	0	0	0	0.150766667	0.001	-7.236173685	0.027797618	1	no	-	--	-	-	-	-
Unigene0064614	5.333333333	14.66666667	0.3838	0.3737	0.2652	0.8005	1.4881	0.816	0.3409	1.034866667	1.602024397	0.027828864	1	no	-	PREDICTED: scavenger receptor cysteine-rich type 1 protein M130-like isoform X2 [Sinocyclocheilus rhinocerous]	-	-	-	-
Unigene0040002	616	1161.666667	8.4226	5.7975	16.6071	33.2845	15.6886	15.7079	10.27573333	21.56033333	1.069138127	0.027847523	1	no	-	--	-	-	-	-
Unigene0048548	2.666666667	10	0.5808	0.3393	0	2.1803	1.0808	0.7409	0.3067	1.334	2.120858595	0.02790914	1	no	-	--	-	-	-	-
Unigene0011105	3.333333333	11.33333333	0.2201	0.1429	0.3802	1.1016	0.5973	1.0027	0.247733333	0.900533333	1.861991678	0.027917168	1	no	-	--	-	-	-	-
Unigene0018421	5.666666667	18.33333333	0.1064	0.3624	0.441	1.2644	0.3711	1.4537	0.303266667	1.029733333	1.763611937	0.027952016	1	no	POL	PREDICTED: cyclin-dependent kinase 12-like isoform X1 [Cyprinus carpio]	-	-	-	-
Unigene0071288	3.333333333	11.33333333	0.3508	0.0854	0.4545	1.0974	1.122	1.0388	0.2969	1.086066667	1.871063665	0.027977096	1	no	-	--	-	-	-	-
Unigene0066538	1.333333333	6.666666667	0.2061	0.1003	0.1068	0.6448	0.4794	1.0329	0.137733333	0.719033333	2.3841809	0.028066277	1	no	-	--	-	-	-	-
Unigene0051451	3657	5915.333333	45.0395	52.1181	28.7157	60.4765	84.9931	75.4882	41.95776667	73.6526	0.811798567	0.028120431	1	no	AHNAK	PREDICTED: LOW QUALITY PROTEIN: neuroblast differentiation-associated protein AHNAK-like [Sinocyclocheilus anshuiensis]	-	-	-	-
Unigene0008910	45	13.33333333	3.6613	1.8054	0.9364	0.2975	1.3825	0.4332	2.134366667	0.7044	-1.599341226	0.028121354	1	no	-	--	-	-	-	-
Unigene0020015	18	3.333333333	2.4256	0.4468	0.6795	0	0	0.5973	1.183966667	0.1991	-2.572063338	0.028126493	1	no	Trim16	PREDICTED: stonustoxin subunit beta-like [Cyprinus carpio]	-	-	-	-
Unigene0070385	3.333333333	11.66666667	0.452	0.176	0.2811	1.9228	1.3667	0.4118	0.303033333	1.233766667	2.025521171	0.028139017	1	no	-	--	-	-	-	-
Unigene0051820	12.33333333	30	1.0433	0.6251	1.331	2.8119	1.5868	3.2907	0.9998	2.563133333	1.358197097	0.028198694	1	no	-	--	-	-	-	-
Unigene0021558	3.333333333	0	0	0.4671	0.4973	0	0	0	0.321466667	0.001	-8.32852534	0.028256469	1	no	-	--	-	-	-	-
Unigene0072694	1.666666667	7.333333333	0.0936	0.1822	0.194	0.5855	0.6531	0.938	0.1566	0.725533333	2.211957685	0.028263179	1	notest	-	--	-	-	-	-
Unigene0061795	2.666666667	10	0.1157	0.3378	0.4795	1.7366	1.7486	0.5269	0.311	1.337366667	2.104408579	0.028265244	1	no	-	--	-	-	-	-
Unigene0069015	1.333333333	7	0.091	0.0886	0.1887	0.5694	1.3761	0.2488	0.122766667	0.731433333	2.574807479	0.028284103	1	no	-	--	-	-	-	-
Unigene0058961	20.66666667	61	0.7991	4.2233	2.0115	2.5712	6.3731	12.1697	2.344633333	7.038	1.58580319	0.028296682	1	no	-	--	-	-	-	-
Unigene0066315	11.66666667	2.666666667	1.4239	0.6469	1.2791	0.3563	0.4416	0.0865	1.116633333	0.2948	-1.921347099	0.028316895	1	no	-	--	-	-	-	-
Unigene0026236	2535	1374	88.9139	96.8829	86.053	53.8196	43.6724	60.6539	90.6166	52.7153	-0.781553613	0.028383866	1	no	GEMIN7	PREDICTED: gem-associated protein 7-like [Sinocyclocheilus anshuiensis]	ko03013//RNA transport//Translation//Genetic Information Processing	-	-	-
Unigene0058616	1	6	0.2061	0.1003	0	1.2895	0.5993	0.2817	0.102133333	0.7235	2.82453922	0.028391957	1	no	-	--	-	-	-	-
Unigene0061854	5.333333333	18.33333333	0.311	0	0.5372	1.4916	0.7234	0.9445	0.282733333	1.053166667	1.897219878	0.028449529	1	no	-	--	-	-	-	-
Unigene0065034	0.666666667	5.333333333	0.1152	0.1121	0	1.4409	0.2679	0.4197	0.075766667	0.7095	3.227167501	0.028460857	1	no	-	--	-	-	-	-
Unigene0065998	8.333333333	21.33333333	0.6089	0.4149	0.5048	1.5237	0.9206	1.7197	0.509533333	1.388	1.445759133	0.028484201	1	no	-	--	-	-	-	-
Unigene0066137	0.666666667	5	0.1933	0	0	0.6048	0.7869	0.2642	0.064433333	0.551966667	3.098702008	0.028500634	1	no	-	--	-	-	-	-
Unigene0030995	164	25.66666667	17.5575	0.2535	0.5012	0.3724	2.0334	0.7456	6.104066667	1.050466667	-2.538740336	0.02850222	1	no	PLA2G1B	PREDICTED: phospholipase A2, minor isoenzyme-like [Sinocyclocheilus anshuiensis]	ko01100//Metabolic pathways//Global and Overview//Metabolism;ko01110//Biosynthesis of secondary metabolites//Global and Overview//Metabolism;ko04270//Vascular smooth muscle contraction//Circulatory system//Organismal Systems;ko00564//Glycerophospholipid metabolism//Lipid metabolism//Metabolism;ko00590//Arachidonic acid metabolism//Lipid metabolism//Metabolism;ko00565//Ether lipid metabolism//Lipi…	-	GO:0016787//hydrolase activity;GO:0004620//phospholipase activity;GO:0003824//catalytic activity;GO:0016788//hydrolase activity, acting on ester bonds;GO:0016298//lipase activity	GO:0044710//single-organism metabolic process;GO:0071704//organic substance metabolic process;GO:0009987//cellular process;GO:0006796//phosphate-containing compound metabolic process;GO:0006793//phosphorus metabolic process;GO:0008152//metabolic process;GO:0044699//single-organism process;GO:0044238//primary metabolic process;GO:0006629//lipid metabolic process;GO:0044237//cellular metabolic proc…
Unigene0025678	13.66666667	3.333333333	0.5077	1.0709	1.9295	0.4235	0.1968	0.3084	1.169366667	0.309566667	-1.917405333	0.028559742	1	no	-	--	-	-	-	-
Unigene0015847	10.33333333	1	1.4879	1.5451	0	0	0	0.2711	1.011	0.090366667	-3.48384848	0.028563379	1	no	-	--	-	-	-	-
Unigene0057819	1.666666667	8.333333333	0.264	0.1713	0	0.6606	0.4093	1.2026	0.1451	0.7575	2.384198369	0.028583207	1	no	-	--	-	-	-	-
Unigene0017654	6.666666667	1.333333333	0.5902	0.4309	0.4588	0.0923	0.0858	0.1344	0.4933	0.104166667	-2.243571598	0.028585982	1	no	Epm2aip1	PREDICTED: LOW QUALITY PROTEIN: general transcription factor II-I repeat domain-containing protein 2-like [Cynoglossus semilaevis]	-	-	-	-
Unigene0035142	77.33333333	14.66666667	5.1839	0.1835	5.7638	0	0.3289	1.6317	3.7104	0.653533333	-2.505241998	0.028697395	1	no	-	PREDICTED: uncharacterized protein LOC106676412 [Maylandia zebra]	-	-	-	-
Unigene0062379	2.666666667	11	0.337	0.1312	0.0699	1.0962	1.3325	0.1842	0.179366667	0.870966667	2.279705699	0.028717743	1	no	-	hypothetical protein EH28_18286 [Larimichthys crocea]	ko01100//Metabolic pathways//Global and Overview//Metabolism;ko00670//One carbon pool by folate//Metabolism of cofactors and vitamins//Metabolism	-	-	-
Unigene0023782	7.333333333	1	0.6444	0.1882	0.6011	0	0.2248	0	0.4779	0.074933333	-2.673029233	0.028717839	1	no	-	--	-	-	-	-
Unigene0036313	114	255	0.7182	1.7394	0.5862	5.0778	2.2345	0.8098	1.0146	2.707366667	1.415979224	0.028718999	1	no	Acsl4	PREDICTED: long-chain-fatty-acid--CoA ligase 4-like [Sinocyclocheilus rhinocerous]	ko01100//Metabolic pathways//Global and Overview//Metabolism;ko04920//Adipocytokine signaling pathway//Endocrine system//Organismal Systems;ko04146//Peroxisome//Transport and catabolism//Cellular Processes;ko03320//PPAR signaling pathway//Endocrine system//Organismal Systems;ko01212//Fatty acid metabolism//Global and Overview//Metabolism;ko00071//Fatty acid degradation//Lipid metabolism//Metaboli…	-	GO:0003824//catalytic activity	-
Unigene0031891	0	4	0	0	0	0	0.2007	0.786	0.001	0.3289	8.361505198	0.028735641	1	no	-	--	-	-	-	-
Unigene0028042	0.666666667	5.333333333	0	0.2232	0	1.4346	0.4	0.3134	0.0744	0.716	3.266585061	0.028752049	1	no	-	--	-	-	-	-
Unigene0013720	8	1.666666667	0.9809	0.6685	0.7117	0	0.2282	0.2681	0.787033333	0.165433333	-2.250174786	0.028774357	1	no	-	--	-	-	-	-
Unigene0018249	18	4.333333333	0.9749	0.9491	1.0105	0.4744	0.378	0	0.978166667	0.284133333	-1.78351221	0.028783697	1	no	-	--	-	-	-	-
Unigene0001746	4	16.33333333	0.4204	0	0.4357	0.4384	2.3632	0.9576	0.285366667	1.253066667	2.134574442	0.028797385	1	no	-	--	-	-	-	-
Unigene0063515	2.666666667	9.666666667	0.2721	0.1766	0.282	0.908	0.7384	1.157	0.243566667	0.934466667	1.939826496	0.028925601	1	no	-	PREDICTED: uncharacterized protein LOC107677180 isoform X3 [Sinocyclocheilus anshuiensis]	-	-	-	-
Unigene0026735	4.333333333	12.66666667	0.2195	0.5698	0.1517	1.1901	1.0211	0.8666	0.313666667	1.025933333	1.709632858	0.028950241	1	no	-	--	-	-	-	-
Unigene0043886	62.33333333	120.6666667	0.6574	1.3511	0.7116	2.3946	1.784	1.6771	0.9067	1.9519	1.106181952	0.028976426	1	no	-	--	-	-	-	-
Unigene0000768	6.666666667	21	0.3166	0.2055	1.6405	4.3571	1.8408	1.4421	0.720866667	2.546666667	1.820805793	0.029005366	1	no	-	Nipped-B-like B, partial [Nestor notabilis]	-	-	-	-
Unigene0005360	3.666666667	13	0.1885	0.5506	0.2931	1.887	0.3289	1.7175	0.344066667	1.311133333	1.93005437	0.029056702	1	no	-	--	-	-	-	-
Unigene0005232	10.66666667	26.33333333	0.9293	1.3571	0.6742	1.6279	4.2152	2.2015	0.986866667	2.681533333	1.442131103	0.029073554	1	no	-	--	-	-	-	-
Unigene0030226	35.66666667	86	0.9139	0.6302	0.4934	0.7147	3.6096	1.1276	0.679166667	1.8173	1.419959041	0.029073896	1	no	Map7d1	PREDICTED: MAP7 domain-containing protein 2-like isoform X5 [Sinocyclocheilus rhinocerous]	-	-	-	-
Unigene0015714	3.666666667	10.66666667	0.3311	0.4297	0.4575	1.7951	1.2835	0.9049	0.4061	1.327833333	1.709167142	0.02912995	1	no	-	--	-	-	-	-
Unigene0024652	2.666666667	9.666666667	0	0.4093	0.1452	0.7014	0.7334	0.7661	0.184833333	0.733633333	1.988834231	0.029138342	1	no	-	--	-	-	-	-
Unigene0063803	6.666666667	17.33333333	0.2873	0.6152	0.2382	1.1502	1.2695	0.8899	0.380233333	1.1032	1.536737445	0.029166898	1	no	-	--	-	-	-	-
Unigene0063289	18	5.333333333	1.3861	0.6747	0.6157	0.3717	0.1727	0.3157	0.892166667	0.2867	-1.637771342	0.029170139	1	no	-	--	-	-	-	-
Unigene0072145	1.666666667	9.333333333	0.0996	0.1939	0.2064	0.3738	2.5476	0.2722	0.166633333	1.064533333	2.675472194	0.029174467	1	no	-	pol-like protein [Danio rerio]	-	-	-	-
Unigene0062112	0.333333333	3.666666667	0.0992	0	0	0.3724	0.4615	0.3615	0.033066667	0.398466667	3.591009517	0.02919995	1	no	-	--	-	-	-	-
Unigene0066375	3.333333333	10	0.2499	0.4865	0.5179	1.7195	1.5983	0.9106	0.4181	1.409466667	1.753229411	0.029200224	1	no	-	--	-	-	-	-
Unigene0049384	43	17.33333333	0.8455	0.9954	0.6929	0.2706	0.2973	0.5016	0.8446	0.3565	-1.24436617	0.029262181	1	no	-	--	-	-	-	-
Unigene0015841	0.666666667	4.333333333	0	0.1161	0.1237	0.7464	0.555	0.4348	0.079933333	0.578733333	2.856029583	0.02926246	1	no	-	--	-	-	-	-
Unigene0027820	33	72	1.269	1.9528	0.8061	2.2538	5.237	2.3124	1.342633333	3.267733333	1.28322489	0.029286136	1	no	PKP3	PREDICTED: plakophilin-3-like [Sinocyclocheilus anshuiensis]	-	GO:0005623//cell;GO:0005622//intracellular;GO:0043226//organelle;GO:0044424//intracellular part;GO:0005911//cell-cell junction;GO:0043229//intracellular organelle;GO:0044464//cell part;GO:0043231//intracellular membrane-bounded organelle;GO:0043227//membrane-bounded organelle;GO:0030054//cell junction	-	GO:0022610//biological adhesion
Unigene0011729	6.333333333	22.33333333	0.1122	0.6009	0.349	0.6319	0.6526	2.454	0.354033333	1.246166667	1.815539926	0.02930572	1	no	-	PREDICTED: interferon-induced very large GTPase 1-like [Sinocyclocheilus grahami]	-	-	-	-
Unigene0005081	1.666666667	9	0.1682	0.0819	0.1743	2.2094	0.3912	0.1532	0.141466667	0.917933333	2.697927223	0.02932079	1	no	-	--	-	-	-	-
Unigene0064249	1.333333333	12.33333333	0	0.3243	0	1.1464	0	1.973	0.1081	1.0398	3.265867632	0.029329874	1	no	-	--	-	-	-	-
Unigene0060028	10.66666667	1.666666667	0.8602	0.0441	0.5631	0.1133	0	0.1238	0.489133333	0.079033333	-2.629694622	0.029386277	1	no	twf2	PREDICTED: twinfilin-2-like [Sinocyclocheilus grahami]	-	GO:0005623//cell;GO:0044464//cell part	-	GO:0006461//protein complex assembly;GO:0008154//actin polymerization or depolymerization;GO:0044763//single-organism cellular process;GO:0006996//organelle organization;GO:0044085//cellular component biogenesis;GO:0051258//protein polymerization;GO:1902589//single-organism organelle organization;GO:0016043//cellular component organization;GO:0070271//protein complex biogenesis;GO:0007015//actin …
Unigene0062547	0	3	0	0	0	1.045	0.1388	0.1087	0.001	0.430833333	8.750986064	0.029461718	1	no	-	--	-	-	-	-
Unigene0073213	14	32.66666667	0.6739	0.2624	0.489	1.0962	0.9797	1.443	0.4751	1.172966667	1.303858904	0.029484867	1	notest	-	PREDICTED: zinc finger BED domain-containing protein 1-like [Pygocentrus nattereri]	-	-	-	-
Unigene0073011	4.666666667	0	0	0.0465	0.6442	0	0	0	0.230233333	0.001	-7.846952913	0.02950057	1	notest	-	PREDICTED: LOW QUALITY PROTEIN: immunoglobulin superfamily member 10-like [Sinocyclocheilus anshuiensis]	-	-	-	-
Unigene0010630	18.33333333	159	1.3085	0.615	0.5612	0.2823	0	19.4038	0.828233333	6.562033333	2.98603375	0.029523776	1	no	Ckm	PREDICTED: creatine kinase M-type-like, partial [Xiphophorus maculatus]	ko01100//Metabolic pathways//Global and Overview//Metabolism;ko00330//Arginine and proline metabolism//Amino acid metabolism//Metabolism	-	GO:0001882//nucleoside binding;GO:0016772//transferase activity, transferring phosphorus-containing groups;GO:1901363//heterocyclic compound binding;GO:0032549//ribonucleoside binding;GO:0003824//catalytic activity;GO:0016740//transferase activity;GO:0097159//organic cyclic compound binding;GO:0001883//purine nucleoside binding;GO:0036094//small molecule binding;GO:0032550//purine ribonucleoside …	GO:0006796//phosphate-containing compound metabolic process;GO:0044237//cellular metabolic process;GO:0008152//metabolic process;GO:0009987//cellular process;GO:0006793//phosphorus metabolic process
Unigene0001258	0	3.666666667	0	0	0	0.3998	0	0.0647	0.001	0.154833333	7.274572286	0.029527771	1	no	-	--	-	-	-	-
Unigene0060426	0.666666667	4.333333333	0.1261	0	0.1307	0.7891	0.44	0.5746	0.0856	0.601233333	2.812242295	0.029574856	1	no	-	--	-	-	-	-
Unigene0022206	0.666666667	4.333333333	0.1193	0.1161	0	0.7464	0.4163	0.5435	0.078466667	0.568733333	2.857600543	0.029577178	1	no	-	--	-	-	-	-
Unigene0009653	11	26.33333333	0.2515	0.1959	0.391	0.6294	0.6728	0.825	0.279466667	0.709066667	1.34324506	0.029651009	1	no	-	--	-	-	-	-
Unigene0031200	101	182.3333333	2.9746	3.7333	4.1975	8.4757	6.5024	6.5962	3.635133333	7.191433333	0.984271063	0.029686316	1	no	MUC5B	PREDICTED: mucin-2 [Danio rerio]	ko04970//Salivary secretion//Digestive system//Organismal Systems	-	-	-
Unigene0043507	155.3333333	67.33333333	4.6909	2.0005	3.0334	1.6882	1.207	1.6453	3.2416	1.5135	-1.098817404	0.029692326	1	no	crygnb	PREDICTED: gamma-crystallin N-B [Cyprinus carpio]	-	-	GO:0005198//structural molecule activity	-
Unigene0049128	188.3333333	339	1.8007	2.4733	1.2005	3.2641	4.9131	2.7936	1.824833333	3.656933333	1.002869621	0.029722326	1	no	LIAT1	PREDICTED: nucleus accumbens-associated protein 2-like [Sinocyclocheilus anshuiensis]	-	-	-	-
Unigene0058981	1.666666667	7.333333333	0.2145	0.1044	0.2223	0.5367	1.3718	0.6839	0.1804	0.864133333	2.260054595	0.02973541	1	no	-	--	-	-	-	-
Unigene0051106	140.6666667	293.6666667	2.1	4.3004	1.1633	4.7117	9.8536	3.3814	2.521233333	5.982233333	1.246554541	0.029745039	1	no	Endog	PREDICTED: endonuclease G, mitochondrial-like [Sinocyclocheilus grahami]	ko04210//Apoptosis//Cell growth and death//Cellular Processes	-	-	-
Unigene0021559	17.33333333	4.333333333	0.1976	0.7312	1.1472	0.2473	0.2299	0.1081	0.692	0.1951	-1.82655826	0.029762901	1	no	-	--	-	-	-	-
Unigene0007432	14	30.33333333	0.432	0.368	0.3358	1.0472	0.8164	0.8364	0.3786	0.9	1.24925059	0.029774796	1	no	-	Acidic leucine-rich nuclear phosphoprotein 32 family member B [Salmo salar]	-	-	-	GO:0006725//cellular aromatic compound metabolic process;GO:1901360//organic cyclic compound metabolic process;GO:0071704//organic substance metabolic process;GO:0006259//DNA metabolic process;GO:0006139//nucleobase-containing compound metabolic process;GO:0046483//heterocycle metabolic process;GO:0008152//metabolic process;GO:0044238//primary metabolic process;GO:0044260//cellular macromolecule …
Unigene0040678	88	172.6666667	2.1354	4.6542	1.5526	7.4177	6.2644	4.7334	2.780733333	6.1385	1.142420763	0.029787646	1	no	-	--	-	-	-	-
Unigene0004806	1.666666667	7.666666667	0.097	0.2833	0.1006	1.5781	0.5642	0.442	0.1603	0.861433333	2.425964725	0.02979969	1	no	-	--	-	-	-	-
Unigene0063443	9	2	0.4944	0.6188	0.8052	0	0.1643	0.2574	0.639466667	0.140566667	-2.185614637	0.029808803	1	no	Camsap3	PREDICTED: calmodulin-regulated spectrin-associated protein 3-like isoform X4 [Sinocyclocheilus rhinocerous]	-	-	-	-
Unigene0013586	5.666666667	15.66666667	0.211	0.5136	0.1641	0.9242	1.1045	0.7211	0.296233333	0.9166	1.629558298	0.029824291	1	no	-	--	-	-	-	-
Unigene0011846	12	2.333333333	0.329	0.2242	0.0341	0	0.0191	0.0899	0.195766667	0.036333333	-2.429769503	0.029836759	1	no	Hs3st1	PREDICTED: heparan sulfate glucosamine 3-O-sulfotransferase 1-like [Cyprinus carpio]	ko00534//Glycosaminoglycan biosynthesis - heparan sulfate / heparin//Glycan biosynthesis and metabolism//Metabolism	-	GO:0016740//transferase activity;GO:0003824//catalytic activity;GO:0016782//transferase activity, transferring sulfur-containing groups	GO:0000902//cell morphogenesis;GO:0048869//cellular developmental process;GO:0048856//anatomical structure development;GO:0044767//single-organism developmental process;GO:0071840//cellular component organization or biogenesis;GO:0044763//single-organism cellular process;GO:0048858//cell projection morphogenesis;GO:0032990//cell part morphogenesis;GO:0016043//cellular component organization;GO:00…
Unigene0053625	795	1339.666667	86.3753	48.2419	70.3103	166.9847	97.0796	115.2083	68.30916667	126.4242	0.888121552	0.02984962	1	no	ZAN	PREDICTED: GATA zinc finger domain-containing protein 14, partial [Austrofundulus limnaeus]	-	-	-	-
Unigene0071933	8	0.666666667	1.4782	0	1.5322	0	0.2865	0	1.003466667	0.0955	-3.39334815	0.029871055	1	no	-	--	-	-	-	-
Unigene0067513	3.666666667	0.333333333	0.4974	0.3632	0.5155	0	0	0.1133	0.4587	0.037766667	-3.602365547	0.0299453	1	no	-	--	-	-	-	-
Unigene0041788	18	37.66666667	2.5115	1.8894	1.7749	4.4282	4.9126	4.6807	2.0586	4.673833333	1.182942757	0.029967909	1	no	-	PREDICTED: oocyte zinc finger protein XlCOF6-like [Sinocyclocheilus rhinocerous]	-	-	-	-
Unigene0034086	3	16.66666667	0.8453	0	0	4.2307	0.7646	0.599	0.281766667	1.864766667	2.726422267	0.02996988	1	no	-	--	-	-	-	-
Unigene0039002	24.33333333	7.666666667	0.3852	0.7501	1.2311	0.3615	0.1493	0.2925	0.7888	0.267766667	-1.558683176	0.030027417	1	no	-	--	-	-	-	-
Unigene0036818	12.66666667	28.66666667	0.545	0.7958	0.7343	1.6366	1.331	2.0358	0.6917	1.6678	1.269727932	0.030033481	1	no	-	--	-	-	-	-
Unigene0000473	14.66666667	3.333333333	0.8613	1.118	1.1903	0.6287	0	0.1962	1.056533333	0.274966667	-1.942009644	0.030036	1	no	-	--	-	-	-	-
Unigene0000721	77	146.6666667	0.9072	1.567	0.8948	1.8859	2.7399	2.3465	1.123	2.3241	1.049314218	0.030050955	1	no	PEG10	Retrotransposable element Tf2 protein type 1 [Larimichthys crocea]	-	-	-	-
Unigene0060536	3.333333333	15.66666667	0	0.0724	0.694	0.5585	1.2979	1.7624	0.255466667	1.206266667	2.23934191	0.030112898	1	no	-	--	-	-	-	-
Unigene0015400	4.666666667	13.33333333	0.3748	0.1824	0.3237	1.4851	0.8718	0.5122	0.293633333	0.956366667	1.703548094	0.030121568	1	no	-	--	-	-	-	-
Unigene0072994	0.666666667	4.666666667	0	0.1252	0.1333	0.4826	0.8972	0.5857	0.086166667	0.655166667	2.926660178	0.030125245	1	notest	-	--	-	-	-	-
Unigene0002473	78.33333333	213.6666667	1.9947	9.1163	1.7229	29.9511	9.8596	2.8271	4.277966667	14.2126	1.732173354	0.030131316	1	no	-	--	-	-	-	-
Unigene0063264	2.666666667	9.333333333	0.2189	0.3196	0.3403	1.2325	0.7637	1.2963	0.292933333	1.0975	1.905576666	0.03013383	1	no	-	--	-	-	-	-
Unigene0016766	15	36.33333333	0.3491	0.2914	0.1034	0.8738	0.3867	0.712	0.247966667	0.6575	1.406844697	0.030140544	1	no	LGALS8	PREDICTED: galectin-8-like [Sinocyclocheilus rhinocerous]	-	-	-	-
Unigene0006462	49.66666667	121.3333333	4.3353	1.9952	5.5556	23.2772	3.8504	6.1765	3.962033333	11.10136667	1.486424372	0.030152309	1	no	-	PREDICTED: E3 SUMO-protein ligase RanBP2-like [Cyprinus carpio]	-	-	-	-
Unigene0027718	34.33333333	68.66666667	1.3959	1.5059	0.9776	3.163	2.2378	3.025	1.293133333	2.8086	1.118980134	0.030154401	1	no	-	--	-	-	-	-
Unigene0043352	25	57	0.6872	0.5425	0.154	1.0923	1.1017	1.2353	0.461233333	1.1431	1.309382933	0.030155232	1	no	-	--	-	-	-	-
Unigene0055618	30.66666667	62	0.646	1.1792	0.6416	2.3912	1.6278	1.545	0.822266667	1.854666667	1.173481668	0.030209296	1	no	Rnh1	PREDICTED: LOW QUALITY PROTEIN: protein NLRC5-like [Sinocyclocheilus grahami]	-	-	-	-
Unigene0058346	1.333333333	7	0	0.0921	0.2941	0.8285	0.44	0.8618	0.128733333	0.7101	2.463636543	0.030210103	1	no	-	PREDICTED: uncharacterized protein LOC105357524 [Oryzias latipes]	-	-	-	-
Unigene0056549	2.333333333	9	0.4044	0	0.3143	1.1384	1.1757	0.7368	0.239566667	1.016966667	2.085773302	0.030216726	1	no	-	--	-	-	-	-
Unigene0047302	14.66666667	3.333333333	1.6905	0.2743	1.1681	0.3526	0.1638	0.2567	1.0443	0.2577	-2.018771778	0.03025746	1	no	-	--	-	-	-	-
Unigene0047214	20	6	1.2268	1.1944	1.9448	0.8127	0.4197	0.263	1.455333333	0.498466667	-1.545780692	0.030273413	1	no	-	--	-	-	-	-
Unigene0056008	48.66666667	102.6666667	1.0869	3.1746	0.9764	4.6242	4.5931	3.2021	1.745966667	4.1398	1.245535055	0.030288461	1	no	-	--	-	-	-	-
Unigene0051719	31.33333333	62.66666667	1.4248	1.2239	1.3031	2.3597	3.6554	2.5964	1.317266667	2.8705	1.123754622	0.030299681	1	no	-	--	-	-	-	-
Unigene0004352	6.333333333	17.33333333	1.2733	0.7438	0.3959	1.7526	2.5176	2.7844	0.804333333	2.351533333	1.547736368	0.030323624	1	no	-	--	-	-	-	-
Unigene0072018	7.333333333	0.666666667	1.3632	0	0.8074	0	0.1132	0.0887	0.723533333	0.0673	-3.426381074	0.030326688	1	no	-	--	-	-	-	-
Unigene0010207	78.66666667	28.33333333	4.1292	3.3296	2.3777	1.6179	1.9404	0.532	3.278833333	1.363433333	-1.26593841	0.030389247	1	no	-	--	-	-	-	-
Unigene0042381	37.33333333	12.66666667	0.8871	2.0151	1.8388	0.37	0.1474	1.0776	1.580333333	0.531666667	-1.571634969	0.030398513	1	no	-	PREDICTED: uncharacterized protein LOC107094043 [Cyprinodon variegatus]	-	-	-	-
Unigene0011234	3	12.33333333	0	0.3947	0.2101	1.7754	0.2357	0.8003	0.2016	0.937133333	2.216758687	0.030407518	1	no	-	--	-	-	-	-
Unigene0019137	3.666666667	11	0.1295	0.3152	0.2685	1.1344	0.8284	0.472	0.237733333	0.8116	1.771424663	0.030419112	1	no	-	--	-	-	-	-
Unigene0018427	3	9.333333333	0.0974	0.1264	0.0673	0.4061	0.2265	0.3549	0.097033333	0.329166667	1.762265909	0.030435875	1	no	-	--	-	-	-	-
Unigene0015352	0	6.333333333	0	0	0	0	0	1.6375	0.001	0.545833333	9.092316691	0.030470123	1	no	ORF1	--	-	-	-	-
Unigene0037353	13.33333333	33.66666667	0.2987	1.1632	0.516	1.9311	2.9529	0.8618	0.6593	1.915266667	1.538538289	0.030479107	1	no	-	PREDICTED: DNA damage-regulated autophagy modulator protein 1-like [Cyprinus carpio]	-	-	-	-
Unigene0061612	2.666666667	16	0.0974	0.1896	0.5046	0.1218	0.7927	3.5487	0.263866667	1.487733333	2.495234939	0.030481413	1	no	-	--	-	-	-	-
Unigene0000657	89.66666667	165.6666667	2.0044	2.3022	1.7507	4.1989	3.1956	4.6375	2.0191	4.010666667	0.990129701	0.030490204	1	no	-	--	-	-	-	-
Unigene0063915	4.666666667	15	0.0742	0.5778	0.3845	2.2279	0.604	0.9463	0.3455	1.2594	1.865978957	0.03059027	1	no	-	--	-	-	-	-
Unigene0013052	1	6.666666667	0.3104	0	0	0.3884	0.6016	1.1312	0.103466667	0.707066667	2.772680191	0.030593605	1	no	-	PREDICTED: sialic acid-binding Ig-like lectin 15 [Cyprinus carpio]	-	-	-	-
Unigene0060479	1.666666667	11.33333333	0.1683	0	0.1163	1.4745	0	0.6646	0.094866667	0.713033333	2.909996361	0.03065681	1	no	-	--	-	-	-	-
Unigene0026592	59.33333333	129	1.3077	0.6878	0.6855	1.2978	1.6608	3.0541	0.893666667	2.004233333	1.165241759	0.0306648	1	no	MGAM	PREDICTED: sucrase-isomaltase, intestinal-like [Sinocyclocheilus rhinocerous]	ko01100//Metabolic pathways//Global and Overview//Metabolism;ko00500//Starch and sucrose metabolism//Carbohydrate metabolism//Metabolism;ko00052//Galactose metabolism//Carbohydrate metabolism//Metabolism	-	-	-
Unigene0057025	63.66666667	24.66666667	4.6545	3.5103	4.4166	2.1328	0.61	2.3893	4.1938	1.7107	-1.293671281	0.030676472	1	no	-	--	-	-	-	-
Unigene0043024	4.333333333	15	0.1962	0.382	0.7117	3.9277	0.9127	0.4469	0.429966667	1.762433333	2.035271963	0.030681436	1	no	-	--	-	-	-	-
Unigene0066308	0	3.333333333	0	0	0	0.3112	1.1569	0	0.001	0.489366667	8.934772025	0.030761773	1	no	-	--	-	-	-	-
Unigene0005852	6.666666667	17.33333333	0.658	0.4004	0.5968	1.1321	1.8176	1.6487	0.551733333	1.5328	1.474126417	0.030785127	1	no	-	PREDICTED: polycystic kidney disease protein 1-like 2 [Danio rerio]	-	-	-	-
Unigene0047125	15.66666667	45	0.2929	0.611	1.0842	1.3089	0.8759	3.5073	0.6627	1.897366667	1.517570682	0.030801983	1	no	-	--	-	-	-	-
Unigene0028728	36.66666667	76.33333333	0.5166	1.1026	0.556	2.7845	1.3634	1.05	0.725066667	1.732633333	1.256780822	0.03080716	1	no	RTase	PREDICTED: RNA-directed DNA polymerase from mobile element jockey-like [Danio rerio]	-	-	-	-
Unigene0038581	367.6666667	614.6666667	4.9186	7.3823	5.0654	10.2775	10.3777	10.8735	5.788766667	10.50956667	0.860375274	0.030814275	1	no	-	--	-	-	-	-
Unigene0062994	7.666666667	0.666666667	0	0.4896	1.4768	0.1049	0.0975	0	0.655466667	0.067466667	-3.280275626	0.030816286	1	no	-	--	-	-	-	-
Unigene0004692	27.66666667	56.66666667	2.4077	1.5167	1.9818	6.5572	3.4592	3.4842	1.968733333	4.5002	1.19272141	0.030851813	1	no	-	--	-	-	-	-
Unigene0024811	9.333333333	25.66666667	0.1031	0.602	0.7477	1.225	1.2585	1.7371	0.484266667	1.406866667	1.538611999	0.030860382	1	no	-	--	-	-	-	-
Unigene0064212	1.333333333	7	0.0637	0.124	0.066	0.1593	0.5924	0.6381	0.084566667	0.463266667	2.453681861	0.030880093	1	no	ARR3	arrestin-C [Danio rerio]	-	-	-	-
Unigene0060750	7	20.66666667	0.2236	0.3421	0.0993	0.4797	0.4459	1.1061	0.221666667	0.677233333	1.611261144	0.030899498	1	no	-	--	-	-	-	-
Unigene0052825	1	6	0.1188	0	0.2462	1.1889	0.2763	0.8657	0.121666667	0.776966667	2.674918742	0.030915009	1	no	-	--	-	-	-	-
Unigene0039985	970.6666667	1529.666667	12.4479	12.5976	11.7517	26.6543	19.5673	17.9952	12.26573333	21.4056	0.803354784	0.030919939	1	no	rergl	PREDICTED: ras-related and estrogen-regulated growth inhibitor-like protein isoform X1 [Cyprinus carpio]	-	-	GO:0036094//small molecule binding;GO:0005488//binding	GO:0009056//catabolic process;GO:0046483//heterocycle metabolic process;GO:0044270//cellular nitrogen compound catabolic process;GO:0034641//cellular nitrogen compound metabolic process;GO:0044699//single-organism process;GO:0044238//primary metabolic process;GO:0006195//purine nucleotide catabolic process;GO:0006725//cellular aromatic compound metabolic process;GO:0065007//biological regulation;…
Unigene0070951	11.33333333	34	1.0357	0.108	0.115	1.8051	1.1616	1.2133	0.419566667	1.393333333	1.731568472	0.030954315	1	no	-	PREDICTED: uncharacterized protein LOC109086375, partial [Cyprinus carpio]	-	-	-	-
Unigene0027207	2.666666667	9.333333333	0.0755	0.4408	0.0782	0.9442	0.6143	0.7563	0.198166667	0.7716	1.961138834	0.031008804	1	no	-	--	-	-	-	-
Unigene0071540	2	10.33333333	0.1687	0.3285	0	1.161	0.1962	1.3833	0.165733333	0.9135	2.462540933	0.031073479	1	no	-	--	-	-	-	-
Unigene0038259	1	11	0	0.0845	0.18	0.1087	3.2318	0	0.088166667	1.1135	3.658724431	0.031078023	1	no	-	--	-	-	-	-
Unigene0034009	10	23	0.2571	0.306	0.2961	0.715	0.7643	0.6768	0.2864	0.7187	1.327358193	0.031118984	1	no	FCGBP	PREDICTED: MAM and LDL-receptor class A domain-containing protein 1-like [Sinocyclocheilus rhinocerous]	-	-	-	-
Unigene0056202	66	123.3333333	2.4871	3.3133	2.8491	6.3878	4.7702	6.3211	2.883166667	5.826366667	1.01494226	0.031124033	1	no	-	--	-	-	-	-
Unigene0016931	29	10	1.7263	0.6634	1.6009	0.5684	0.5284	0.4139	1.3302	0.503566667	-1.401388483	0.03115188	1	no	-	PREDICTED: RNA-directed DNA polymerase from mobile element jockey-like [Oryzias latipes]	-	-	-	-
Unigene0008658	8.666666667	22	0.2297	0.3834	0.2381	1.3141	0.8779	0.3289	0.283733333	0.8403	1.566368834	0.031174597	1	no	-	--	-	-	-	-
Unigene0032944	18	38	2.0373	1.6228	1.3438	3.5921	3.4465	4.3032	1.667966667	3.7806	1.180524758	0.03122999	1	no	-	--	-	-	-	-
Unigene0022002	4.333333333	12.66666667	0.6306	0.2046	0.5447	2.2357	1.5891	0.7661	0.459966667	1.5303	1.734213287	0.031248097	1	no	-	--	-	-	-	-
Unigene0030450	177	342.6666667	1.5452	2.4529	1.2037	2.7094	2.7701	5.0756	1.733933333	3.518366667	1.020857411	0.031252243	1	no	isyna1-a	inositol-3-phosphate synthase [Cyprinus carpio]	ko01100//Metabolic pathways//Global and Overview//Metabolism;ko01130//Biosynthesis of antibiotics//Global and Overview//Metabolism;ko00562//Inositol phosphate metabolism//Carbohydrate metabolism//Metabolism	-	-	GO:0044238//primary metabolic process;GO:0044237//cellular metabolic process;GO:0019751//polyol metabolic process;GO:0008152//metabolic process;GO:0044723//single-organism carbohydrate metabolic process;GO:0006020//inositol metabolic process;GO:0009987//cellular process;GO:0044255//cellular lipid metabolic process;GO:0044710//single-organism metabolic process;GO:0006066//alcohol metabolic process…
Unigene0005412	6	0.666666667	0.2614	0.3393	0.9933	0.218	0	0	0.531333333	0.072666667	-2.870251589	0.031276809	1	no	-	PREDICTED: cell wall protein AWA1-like [Cyprinus carpio]	-	-	-	-
Unigene0047154	25	52.33333333	0.6663	1.2325	0.587	1.7091	2.0923	1.882	0.8286	1.894466667	1.19304403	0.031286226	1	no	-	--	-	-	-	-
Unigene0025898	3	11	0	0.6311	0.192	1.9699	0.7539	0.7594	0.274366667	1.161066667	2.08127369	0.031308277	1	no	-	--	-	-	-	-
Unigene0009339	6.666666667	17.66666667	0.6547	0.2897	0.2468	1.415	1.5229	0.6507	0.397066667	1.1962	1.591005464	0.031311011	1	no	-	--	-	-	-	-
Unigene0008268	14.66666667	34	0.3187	0.5642	0.3904	1.9217	0.674	0.7657	0.424433333	1.120466667	1.400489861	0.031345306	1	no	-	--	-	-	-	-
Unigene0010243	135	58.66666667	1.6019	1.3317	0.6996	0.5856	0.5338	0.5986	1.211066667	0.572666667	-1.080510749	0.031390515	1	no	vtg1	vitellogenin 1 [Ctenopharyngodon idella]	-	-	-	-
Unigene0014105	0.333333333	3.666666667	0.1279	0	0	0.9606	0.2976	0.3497	0.042633333	0.535966667	3.652089515	0.031392777	1	no	-	--	-	-	-	-
Unigene0004209	26.33333333	7.333333333	0.9488	0.5221	1.8386	0	0.3838	0.5262	1.103166667	0.303333333	-1.86267482	0.031411559	1	no	-	PREDICTED: sterile alpha motif domain-containing protein 3-like [Austrofundulus limnaeus]	-	-	-	-
Unigene0057405	107.3333333	198	2.0887	2.2334	1.1712	3.299	3.9823	3.7437	1.8311	3.675	1.005033668	0.031411928	1	no	-	--	-	-	-	-
Unigene0014584	2.666666667	12	0.2096	0	0.3622	0.2623	1.3004	1.0824	0.1906	0.8817	2.20973974	0.031414354	1	no	-	--	-	-	-	-
Unigene0017083	2.333333333	8.333333333	0.2721	0.1766	0.188	0.681	0.9494	0.8264	0.212233333	0.818933333	1.948094748	0.031470653	1	no	ADAM23	PREDICTED: disintegrin and metalloproteinase domain-containing protein 23-like [Cyprinus carpio]	-	-	-	-
Unigene0052088	12.33333333	29.33333333	0.9424	0.2414	0.6683	1.6136	1.3844	1.7172	0.617366667	1.571733333	1.34815697	0.031494404	1	no	-	--	-	-	-	-
Unigene0060152	3	11.33333333	0.5052	0.0703	0.0748	1.2642	0.5875	0.8548	0.216766667	0.902166667	2.057251059	0.031497566	1	no	-	--	-	-	-	-
Unigene0026289	0.333333333	4	0	0.1131	0	1.0175	0.1351	0.4234	0.0377	0.525333333	3.8005967	0.03153188	1	no	-	--	-	-	-	-
Unigene0071185	1.333333333	7	0.1899	0	0.1968	0.8315	0.3312	0.9514	0.1289	0.7047	2.45075695	0.031534101	1	no	PARP6	PREDICTED: poly [ADP-ribose] polymerase 6-like isoform X2 [Sinocyclocheilus grahami]	-	-	-	-
Unigene0014359	4.666666667	13.33333333	0.2879	0.5605	0.1492	0.9906	1.0045	1.1148	0.332533333	1.036633333	1.64033482	0.03154546	1	no	-	--	-	-	-	-
Unigene0053917	6	0.666666667	0.9212	0.1121	1.0742	0	0.1339	0.1049	0.7025	0.0796	-3.141657889	0.031560534	1	no	-	--	-	-	-	-
Unigene0003944	3	10	0.3098	0.1508	0.2408	0.969	0.6305	0.9173	0.2338	0.838933333	1.84328124	0.031569376	1	no	-	PREDICTED: A-agglutinin anchorage subunit-like [Dipodomys ordii]	-	-	-	-
Unigene0047145	4	15.66666667	0.1933	0.5646	0	0.8063	0.5246	1.7614	0.252633333	1.030766667	2.028600878	0.031588021	1	no	-	--	-	-	-	-
Unigene0009180	31	79.66666667	0.5825	0.6004	2.0597	2.8296	1.4346	4.2769	1.080866667	2.847033333	1.397270818	0.031613287	1	no	crygna	gamma-crystallin N-A [Danio rerio]	-	-	GO:0005198//structural molecule activity	-
Unigene0021009	8.333333333	1.333333333	0.2927	0.2137	1.365	0.0915	0.1702	0.0667	0.6238	0.109466667	-2.510591926	0.031619732	1	no	RGS9	PREDICTED: regulator of G-protein signaling 9-like, partial [Sinocyclocheilus grahami]	ko04744//Phototransduction//Sensory system//Organismal Systems	GO:0005886//plasma membrane;GO:0005622//intracellular;GO:0071944//cell periphery;GO:0098552//side of membrane;GO:0098562//cytoplasmic side of membrane;GO:0044425//membrane part;GO:0044424//intracellular part;GO:0044459//plasma membrane part;GO:0044464//cell part;GO:0019898//extrinsic component of membrane;GO:0019897//extrinsic component of plasma membrane;GO:0005623//cell;GO:0031234//extrinsic co…	GO:0060089//molecular transducer activity	GO:0065007//biological regulation;GO:0010648//negative regulation of cell communication;GO:0048585//negative regulation of response to stimulus;GO:0048583//regulation of response to stimulus;GO:0010646//regulation of cell communication;GO:0048519//negative regulation of biological process;GO:0050794//regulation of cellular process;GO:0023057//negative regulation of signaling;GO:0009966//regulatio…
Unigene0013769	3.666666667	18.66666667	0	0.6388	0	1.1942	0.3469	1.9023	0.212933333	1.1478	2.430397562	0.031623981	1	no	PGBD4	PREDICTED: piggyBac transposable element-derived protein 4-like [Cyprinus carpio]	-	-	-	-
Unigene0029667	17.33333333	56.33333333	0.0843	1.7244	0.3497	1.3721	2.3544	3.6505	0.719466667	2.459	1.773071982	0.031628052	1	no	-	--	-	-	-	-
Unigene0007149	103.3333333	198.6666667	2.8641	4.917	1.6918	8.5163	5.5517	6.1732	3.157633333	6.747066667	1.095416763	0.031668365	1	no	SP140	PREDICTED: nuclear body protein SP140-like protein isoform X5 [Sinocyclocheilus grahami]	-	-	-	-
Unigene0046912	119	216.6666667	2.5224	1.9645	1.5163	3.9348	3.3835	4.4433	2.001066667	3.920533333	0.970280694	0.031683708	1	no	-	--	-	-	-	-
Unigene0056498	116.3333333	208.3333333	4.5403	3.7998	5.6553	10.8641	7.8745	8.6002	4.665133333	9.112933333	0.965997198	0.031686751	1	no	-	--	-	-	-	-
Unigene0066870	5.333333333	0.333333333	1.0884	0	0.8774	0	0	0.1102	0.655266667	0.036733333	-4.156920421	0.031716326	1	no	-	--	-	-	-	-
Unigene0071042	4575.333333	2104.333333	468.1008	117.2903	334.2985	187.214	135.0243	139.7085	306.5632	153.9822667	-0.993420313	0.03174667	1	no	-	hypothetical protein cypCar_00050296 [Cyprinus carpio]	-	-	-	-
Unigene0008497	9	22.33333333	0.4912	0.3587	0.2546	1.2805	0.6665	1.0443	0.368166667	0.9971	1.437379188	0.031861179	1	no	-	--	-	-	-	-
Unigene0069933	0.333333333	3.666666667	0.1261	0	0	0.3156	0.5867	0.5746	0.042033333	0.4923	3.549931965	0.031868117	1	no	-	--	-	-	-	-
Unigene0060154	0.333333333	3.333333333	0	0.1074	0	0.5523	0.385	0.3016	0.0358	0.412966667	3.527993844	0.03187399	1	no	-	--	-	-	-	-
Unigene0039942	0.333333333	5	0.1305	0	0	1.6325	0.7587	0	0.0435	0.797066667	4.19561309	0.031915471	1	no	-	--	-	-	-	-
Unigene0020199	3.333333333	0	0.3579	0	0.159	0	0	0	0.1723	0.001	-7.428778891	0.03197152	1	no	-	--	-	-	-	-
Unigene0046777	109	43.66666667	2.193	0.9649	3.8467	0.6333	0.8829	1.3641	2.334866667	0.9601	-1.282083583	0.031979057	1	no	-	proprotein convertase subtilisin/kexin type 1 inhibitor, like precursor [Danio rerio]	-	-	-	GO:0031323//regulation of cellular metabolic process;GO:0032269//negative regulation of cellular protein metabolic process;GO:0050789//regulation of biological process;GO:0051346//negative regulation of hydrolase activity;GO:0065009//regulation of molecular function;GO:0051336//regulation of hydrolase activity;GO:0010605//negative regulation of macromolecule metabolic process;GO:0048523//negative…
Unigene0002581	143.6666667	253.3333333	1.6444	2.5511	1.552	3.5633	3.9029	3.6057	1.915833333	3.690633333	0.945896352	0.032058824	1	no	NLRC3	PREDICTED: protein NLRC5 isoform X2 [Danio rerio]	-	-	-	-
Unigene0050209	533.3333333	918.3333333	2.8934	4.1033	2.078	5.8085	4.4317	6.5959	3.0249	5.612033333	0.891636129	0.032072682	1	no	RIN2	PREDICTED: ras and Rab interactor 2-like isoform X1 [Sinocyclocheilus rhinocerous]	-	-	-	-
Unigene0017937	19.33333333	46.33333333	0.4069	0.5093	0.2008	1.0425	0.4507	1.3416	0.372333333	0.944933333	1.343617768	0.032093277	1	no	ITGA8	PREDICTED: integrin alpha-8-like [Sinocyclocheilus grahami]	ko04510//Focal adhesion//Cellular commiunity//Cellular Processes;ko04810//Regulation of actin cytoskeleton//Cell motility//Cellular Processes;ko04514//Cell adhesion molecules (CAMs)//Signaling molecules and interaction//Environmental Information Processing;ko04512//ECM-receptor interaction//Signaling molecules and interaction//Environmental Information Processing	GO:0031224//intrinsic component of membrane;GO:0031226//intrinsic component of plasma membrane;GO:0044425//membrane part;GO:0016020//membrane;GO:0005623//cell;GO:0005886//plasma membrane;GO:0005887//integral component of plasma membrane;GO:0016021//integral component of membrane;GO:0044464//cell part;GO:0044459//plasma membrane part;GO:0071944//cell periphery	-	GO:0050896//response to stimulus;GO:0007165//signal transduction;GO:0065008//regulation of biological quality;GO:0009653//anatomical structure morphogenesis;GO:0022610//biological adhesion;GO:0050794//regulation of cellular process;GO:0050878//regulation of body fluid levels;GO:0023052//signaling;GO:0044763//single-organism cellular process;GO:0051716//cellular response to stimulus;GO:0048646//an…
Unigene0061340	0	3	0	0	0	0.9606	0	0.3497	0.001	0.436766667	8.770718946	0.03211244	1	no	-	--	-	-	-	-
Unigene0022024	5	15.33333333	0.1827	0.3556	0.8519	1.3713	0.956	2.0803	0.4634	1.4692	1.664700852	0.032149402	1	no	-	ORF2-encoded protein, partial [Danio rerio]	-	-	-	-
Unigene0070451	1.333333333	6.333333333	0.1064	0.1036	0.2205	0.7986	0.4948	0.8722	0.1435	0.721866667	2.33068165	0.032170131	1	no	Vmn2r26	PREDICTED: extracellular calcium-sensing receptor-like [Cyprinus carpio]	-	GO:0016020//membrane;GO:0044425//membrane part;GO:0031224//intrinsic component of membrane	GO:0060089//molecular transducer activity	GO:0050896//response to stimulus;GO:0050794//regulation of cellular process;GO:0007154//cell communication;GO:0044700//single organism signaling;GO:0065007//biological regulation;GO:0007165//signal transduction;GO:0009987//cellular process;GO:0051716//cellular response to stimulus;GO:0023052//signaling;GO:0007166//cell surface receptor signaling pathway;GO:0044699//single-organism process;GO:0050…
Unigene0016740	21.33333333	7.333333333	1.2245	0.5298	1.1751	0.3972	0.211	0.4545	0.976466667	0.354233333	-1.46287082	0.032185958	1	no	GJA8	PREDICTED: gap junction alpha-8 protein-like, partial [Sinocyclocheilus grahami]	-	GO:0044425//membrane part;GO:0005921//gap junction;GO:0030054//cell junction;GO:0005911//cell-cell junction;GO:0031224//intrinsic component of membrane;GO:0016020//membrane;GO:0016021//integral component of membrane	GO:0015267//channel activity;GO:0022803//passive transmembrane transporter activity;GO:0022829//wide pore channel activity;GO:0005243//gap junction channel activity;GO:0022857//transmembrane transporter activity;GO:0005215//transporter activity	GO:0044699//single-organism process;GO:0044763//single-organism cellular process;GO:0009987//cellular process
Unigene0049946	37.33333333	76	1.6292	1.7895	1.2557	3.2409	2.3807	4.4533	1.558133333	3.3583	1.10791242	0.032215675	1	no	Trim16	PREDICTED: tripartite motif-containing protein 16-like [Sinocyclocheilus grahami]	-	-	-	-
Unigene0072415	9	2	0.6897	0.4029	0.7864	0	0.1604	0.2514	0.626333333	0.137266667	-2.189949332	0.032231323	1	no	-	--	-	-	-	-
Unigene0068410	6.333333333	29.33333333	1.187	0	0.2307	6.2196	1.5531	0.2028	0.472566667	2.6585	2.492022691	0.032250907	1	no	-	--	-	-	-	-
Unigene0047292	2227	3478.333333	38.1265	64.9733	49.687	93.5257	86.2647	81.7719	50.92893333	87.18743333	0.775634707	0.032254643	1	no	-	--	-	-	-	-
Unigene0023603	159	277	2.6054	3.8747	3.3171	8.3172	5.4639	5.1964	3.265733333	6.325833333	0.953848555	0.032330055	1	no	-	--	-	-	-	-
Unigene0046119	9	26	1.4805	0.4805	0.2558	1.338	2.4872	2.9228	0.738933333	2.249333333	1.605981358	0.032383091	1	no	-	--	-	-	-	-
Unigene0040734	20.66666667	6	1.2164	1.4534	0.745	0.0692	0.1286	0.7557	1.138266667	0.317833333	-1.840496241	0.032410321	1	no	-	--	-	-	-	-
Unigene0020317	1.666666667	7.666666667	0.1204	0	0.4991	1.2051	0.7001	1.0969	0.2065	1.0007	2.276795846	0.032441908	1	no	-	--	-	-	-	-
Unigene0001085	5.666666667	15	0.6603	0.2857	0.3042	1.2852	1.3652	1.0027	0.416733333	1.2177	1.546962339	0.032457091	1	no	-	--	-	-	-	-
Unigene0019400	10.66666667	2	0.373	1.6342	0.9666	0.3501	0.2169	0.085	0.991266667	0.217333333	-2.189363754	0.032506251	1	no	-	--	-	-	-	-
Unigene0024859	5	13.66666667	0.6039	0.252	0.4471	1.0795	1.4047	1.3363	0.434333333	1.2735	1.551924376	0.032516518	1	no	-	hypothetical protein cypCar_00033800 [Cyprinus carpio]	-	-	-	-
Unigene0037428	4	12.33333333	0.4772	0.2323	0.2473	1.3933	0.4625	1.3044	0.318933333	1.0534	1.723726571	0.032520285	1	no	-	--	-	-	-	-
Unigene0015464	2	9.333333333	0.293	0.057	0	0.6599	1.0222	0.2136	0.116666667	0.6319	2.437303844	0.032571615	1	no	cyp19a1	brain-type P450 aromatase, partial [Gobiocypris rarus]	ko01100//Metabolic pathways//Global and Overview//Metabolism;ko00140//Steroid hormone biosynthesis//Lipid metabolism//Metabolism	-	GO:0046872//metal ion binding;GO:0043169//cation binding;GO:1901363//heterocyclic compound binding;GO:0003824//catalytic activity;GO:0016491//oxidoreductase activity;GO:0097159//organic cyclic compound binding;GO:0046906//tetrapyrrole binding;GO:0043167//ion binding;GO:0046914//transition metal ion binding;GO:0005488//binding	GO:0008152//metabolic process;GO:0014070//response to organic cyclic compound;GO:0010033//response to organic substance;GO:0009725//response to hormone;GO:0044710//single-organism metabolic process;GO:0050896//response to stimulus;GO:0048545//response to steroid hormone;GO:0042221//response to chemical;GO:0043627//response to estrogen;GO:0044699//single-organism process;GO:0033993//response to li…
Unigene0049885	0.666666667	5.333333333	0	0	0.1732	1.0454	0.3887	0.1522	0.057733333	0.528766667	3.195154803	0.032612062	1	no	-	PREDICTED: CD226 antigen-like isoform X1 [Sinocyclocheilus grahami]	ko04514//Cell adhesion molecules (CAMs)//Signaling molecules and interaction//Environmental Information Processing	-	-	-
Unigene0068169	19.66666667	5.666666667	3.1578	1.9834	0.8447	0.8922	0.3554	0.6497	1.9953	0.632433333	-1.657620363	0.032619658	1	no	gnrh2	gonadotropin-releasing hormone 2 [Gobiocypris rarus]	ko04912//GnRH signaling pathway//Endocrine system//Organismal Systems	-	GO:0005102//receptor binding;GO:0005488//binding;GO:0005515//protein binding	GO:0044707//single-multicellular organism process;GO:0048856//anatomical structure development;GO:0048513//animal organ development;GO:0048731//system development;GO:0007275//multicellular organism development;GO:0032501//multicellular organismal process;GO:0001654//eye development;GO:0007399//nervous system development;GO:0044699//single-organism process;GO:0007417//central nervous system develo…
Unigene0059736	2.666666667	9.333333333	0.5219	0.254	0.2705	1.1428	1.8209	1.0699	0.3488	1.344533333	1.946633577	0.032622043	1	no	-	--	-	-	-	-
Unigene0059575	4.333333333	12.33333333	0.3496	0.1702	0.6342	1.0937	1.5249	0.9557	0.384666667	1.191433333	1.631017505	0.032639266	1	no	-	--	-	-	-	-
Unigene0072120	3.333333333	0	0.341	0	0.8247	0	0	0	0.388566667	0.001	-8.602018334	0.032652862	1	no	-	--	-	-	-	-
Unigene0036544	88.66666667	177.6666667	1.699	3.0893	1.8387	5.0961	2.7025	6.3061	2.209	4.701566667	1.089748156	0.032714969	1	no	-	--	-	-	-	-
Unigene0027678	56	105.6666667	1.3032	1.3302	0.8933	2.262	2.3714	2.5664	1.175566667	2.399933333	1.029637974	0.032737989	1	no	-	--	-	-	-	-
Unigene0024329	17.66666667	3.666666667	1.9289	0.1445	1.9223	0.557	0.2588	0.1352	1.3319	0.317	-2.070931022	0.032743551	1	no	-	--	-	-	-	-
Unigene0069113	17.33333333	3.666666667	1.5289	0.096	0.9713	0.3086	0.1147	0.1798	0.8654	0.201033333	-2.105932386	0.032751713	1	no	AtMg00860	PREDICTED: uncharacterized mitochondrial protein AtMg00860-like [Sinocyclocheilus anshuiensis]	-	-	-	-
Unigene0059986	0.333333333	4	0	0.1234	0	0.9514	0.7369	0.1155	0.041133333	0.601266667	3.869625086	0.032761216	1	no	-	--	-	-	-	-
Unigene0020234	1	6.333333333	0	0.3792	0	1.6245	0.604	0.5915	0.1264	0.94	2.894664293	0.032799933	1	no	-	--	-	-	-	-
Unigene0032942	20.33333333	42.33333333	1.7424	2.2618	3.1304	7.2676	4.4583	4.6569	2.3782	5.460933333	1.199277498	0.03283395	1	no	-	--	-	-	-	-
Unigene0014053	1.666666667	7	0.0623	0.0607	0.1938	0.5458	0.5798	0.3407	0.1056	0.488766667	2.210536064	0.03286741	1	no	-	PREDICTED: insertion element IS630 uncharacterized 39 kDa protein-like isoform X2 [Sinocyclocheilus anshuiensis]	-	-	-	-
Unigene0031849	1.666666667	9	0	0.4427	0.1178	2.7024	0.5288	0.4143	0.186833333	1.215166667	2.701330423	0.032887192	1	no	-	--	-	-	-	-
Unigene0033525	36.33333333	105.6666667	0.344	1.8208	0.1337	4.5998	2.7253	0.7247	0.766166667	2.683266667	1.808260273	0.032887533	1	no	-	--	-	-	-	-
Unigene0058843	8	1.333333333	0.8462	0.9885	0.1754	0	0.0984	0.2313	0.670033333	0.1099	-2.608041483	0.03289438	1	no	ZNF75A	PREDICTED: gastrula zinc finger protein XlCGF26.1-like [Danio rerio]	-	-	-	-
Unigene0010739	8.666666667	25.66666667	0.4356	0.6361	0.0451	1.5807	1.9759	0.3572	0.372266667	1.3046	1.809199188	0.032912678	1	no	-	--	-	-	-	-
Unigene0008231	20	41.66666667	0.6269	0.6866	1.0558	2.3041	1.4581	1.6421	0.789766667	1.801433333	1.189646879	0.032921066	1	no	-	--	-	-	-	-
Unigene0018753	1.333333333	6.666666667	0	0.2282	0.2429	1.613	0.6815	0.4271	0.157033333	0.9072	2.530349809	0.032968503	1	no	-	--	-	-	-	-
Unigene0019607	4.333333333	17.33333333	0.1874	0	0.6474	1.5632	0.4359	1.4798	0.278266667	1.159633333	2.059128704	0.033014816	1	no	-	--	-	-	-	-
Unigene0056386	92.33333333	189	3.2708	1.3526	3.4801	6.3745	3.7368	7.3845	2.701166667	5.831933333	1.110391568	0.033049957	1	no	-	PREDICTED: inhibin alpha chain isoform X1 [Ictalurus punctatus]	-	-	-	-
Unigene0012237	1.333333333	7	0.0587	0	0.1826	0.8083	0.2732	0.321	0.080433333	0.4675	2.53910095	0.033069915	1	no	-	--	-	-	-	-
Unigene0065328	11.66666667	2.666666667	1.9301	1.1483	0.6668	0.5367	0	0.3908	1.2484	0.309166667	-2.013623576	0.033073369	1	no	-	--	-	-	-	-
Unigene0031210	5.666666667	16	0.4383	0.061	0.5841	1.4102	1.0195	0.9128	0.361133333	1.114166667	1.625361564	0.033099662	1	no	-	--	-	-	-	-
Unigene0011144	20.66666667	6.333333333	1.9947	0.4855	0.9763	0.3467	0.1933	0.5553	1.152166667	0.3651	-1.657985851	0.033154064	1	no	-	--	-	-	-	-
Unigene0068439	3.666666667	0.333333333	0.3857	0.3755	0.6663	0.1609	0	0	0.475833333	0.053633333	-3.149254514	0.033165755	1	no	-	--	-	-	-	-
Unigene0033386	4.333333333	0.333333333	0.4289	0.1044	0.8891	0	0	0.0977	0.474133333	0.032566667	-3.863824857	0.033169075	1	no	clcnkb	PREDICTED: chloride channel protein ClC-Kb-like [Sinocyclocheilus rhinocerous]	-	GO:0016020//membrane;GO:0044425//membrane part;GO:0031224//intrinsic component of membrane	GO:0015108//chloride transmembrane transporter activity;GO:0008509//anion transmembrane transporter activity;GO:0022857//transmembrane transporter activity;GO:1901363//heterocyclic compound binding;GO:0036094//small molecule binding;GO:0022892//substrate-specific transporter activity;GO:0015075//ion transmembrane transporter activity;GO:0000166//nucleotide binding;GO:0005488//binding;GO:0022891//…	GO:0051179//localization;GO:0015698//inorganic anion transport;GO:0044765//single-organism transport;GO:0006811//ion transport;GO:0006810//transport;GO:0044699//single-organism process;GO:1902578//single-organism localization;GO:0044763//single-organism cellular process;GO:0006820//anion transport;GO:0009987//cellular process;GO:0051234//establishment of localization
Unigene0070525	13	3.666666667	0.4383	1.2191	0.7788	0.1567	0.2913	0.2852	0.812066667	0.2444	-1.732353885	0.033169388	1	no	col27a1b	PREDICTED: collagen alpha-1(XXVIII) chain-like [Salmo salar]	-	-	-	-
Unigene0017941	1.333333333	7.333333333	0	0.0486	0.0517	0.0625	0.2032	0.2957	0.033433333	0.187133333	2.484707458	0.033185838	1	no	Flnc	PREDICTED: filamin-A-like [Cyprinus carpio]	ko04010//MAPK signaling pathway//Signal transduction//Environmental Information Processing;ko04510//Focal adhesion//Cellular commiunity//Cellular Processes	-	-	-
Unigene0029715	0	2.333333333	0	0	0	0.2683	0.4988	0.0977	0.001	0.288266667	8.171260212	0.033190892	1	no	ERMAP	PREDICTED: E3 ubiquitin-protein ligase TRIM39-like [Cyprinus carpio]	-	-	-	-
Unigene0033807	70.66666667	135	1.5591	1.7802	0.7182	3.2032	3.4922	2.0343	1.3525	2.9099	1.105340981	0.033222048	1	no	-	--	-	-	-	-
Unigene0054395	27	71	0.2943	2.4557	0.61	6.102	2.8847	1.4555	1.12	3.480733333	1.635892558	0.033246955	1	no	-	--	-	-	-	-
Unigene0046216	15	32	0.9435	1.3122	0.7684	2.6985	2.7433	1.7807	1.008033333	2.4075	1.255992452	0.033279606	1	no	-	--	-	-	-	-
Unigene0050563	2.666666667	10	0.2622	0.3829	0.4077	1.1484	0.7625	2.1503	0.350933333	1.353733333	1.947674683	0.033292384	1	no	Kr	PREDICTED: zinc finger protein 664-like [Sinocyclocheilus grahami]	-	-	-	-
Unigene0014016	1	5.666666667	0	0.1258	0.2678	0.485	1.0518	0.824	0.1312	0.786933333	2.5844737	0.033311692	1	no	-	--	-	-	-	-
Unigene0000474	12.33333333	28	0.3436	0.3649	0.4532	1.6023	0.6175	0.7399	0.387233333	0.986566667	1.349213397	0.03332885	1	no	-	PREDICTED: inositol hexakisphosphate and diphosphoinositol-pentakisphosphate kinase 1-like isoform X3 [Cyprinus carpio]	ko04070//Phosphatidylinositol signaling system//Signal transduction//Environmental Information Processing	-	-	-
Unigene0065136	0.333333333	3.666666667	0	0.1074	0	0.2762	0.385	0.6033	0.0358	0.4215	3.557501139	0.033347983	1	no	-	--	-	-	-	-
Unigene0039819	1	5.333333333	0.1249	0.1216	0.1295	0.469	0.7265	0.9106	0.125333333	0.702033333	2.485769372	0.033358881	1	no	-	--	-	-	-	-
Unigene0062464	3	10.33333333	0.2879	0.1868	0.3978	0.8405	0.8928	1.3989	0.290833333	1.044066667	1.843949299	0.03335908	1	no	-	--	-	-	-	-
Unigene0062252	2.666666667	9	0.495	0.482	0	1.2389	1.2955	1.1276	0.325666667	1.220666667	1.906201324	0.033386509	1	no	-	--	-	-	-	-
Unigene0072545	1.666666667	8.666666667	0	0.3295	0.0877	1.3764	1.0825	0.1542	0.139066667	0.871033333	2.646951273	0.033391412	1	notest	Lpar6	PREDICTED: lysophosphatidic acid receptor 6-like [Sinocyclocheilus rhinocerous]	ko04080//Neuroactive ligand-receptor interaction//Signaling molecules and interaction//Environmental Information Processing	-	-	-
Unigene0059255	1.333333333	7.333333333	0.0701	0	0.2179	0.8767	0.163	0.6384	0.096	0.559366667	2.542687973	0.033489295	1	no	NLRP3	PREDICTED: NACHT, LRR and PYD domains-containing protein 3-like [Sinocyclocheilus rhinocerous]	ko04621//NOD-like receptor signaling pathway//Immune system//Organismal Systems	-	-	-
Unigene0011532	16	4.666666667	1.1324	0.6737	1.2389	0	0.3658	0.5159	1.015	0.2939	-1.788082463	0.033490451	1	no	-	--	-	-	-	-
Unigene0014148	2.333333333	10.33333333	0.0388	0.2265	0	0.5823	0.7667	0.0707	0.088433333	0.473233333	2.419889522	0.033492504	1	no	-	PREDICTED: stonustoxin subunit alpha-like [Sinocyclocheilus anshuiensis]	-	-	-	-
Unigene0067779	26	54	1.1391	1.0694	0.9699	2.0363	1.8453	3.0767	1.059466667	2.319433333	1.130434182	0.033533171	1	no	-	--	-	-	-	-
Unigene0005496	19	43.33333333	0.518	0.9772	0.3356	2.6739	1.0167	1.0915	0.610266667	1.594033333	1.385170102	0.033606005	1	no	Clec4f	PREDICTED: C-type lectin domain family 17, member A-like [Sinocyclocheilus rhinocerous]	-	-	-	-
Unigene0048885	20.33333333	47.66666667	0.2835	1.6165	0.5457	2.5843	2.4492	1.4759	0.815233333	2.1698	1.412277122	0.033613528	1	no	-	--	-	-	-	-
Unigene0060938	0	3.333333333	0	0	0	1.2685	0	0.2309	0.001	0.4998	8.965207091	0.033614484	1	no	-	--	-	-	-	-
Unigene0025561	11	26.66666667	1.0437	0.3175	0.8114	1.8774	1.745	2.0209	0.7242	1.8811	1.377116463	0.033673583	1	no	-	--	-	-	-	-
Unigene0048025	7.333333333	24.33333333	0.5405	1.1276	0	4.1546	1.4369	0.985	0.556033333	2.192166667	1.97911421	0.033690044	1	no	-	PREDICTED: SLAM family member 9-like, partial [Sinocyclocheilus rhinocerous]	-	-	-	-
Unigene0014370	4.666666667	14.33333333	0.568	0.2765	0.1472	1.8658	0.4955	1.0351	0.330566667	1.132133333	1.776030717	0.033787838	1	no	-	PREDICTED: epidermal growth factor receptor substrate 15-like [Cyprinus carpio]	-	-	-	-
Unigene0067657	0	6	0	0	0	0	0	1.8642	0.001	0.6214	9.279378431	0.033808891	1	no	ORF1	--	-	-	-	-
Unigene0026695	22	45.66666667	0.9828	1.6619	0.7506	2.6538	3.4894	1.791	1.131766667	2.644733333	1.224545711	0.033811979	1	no	-	--	-	-	-	-
Unigene0063841	5.666666667	0.333333333	0.8775	0	0.4961	0	0	0.0727	0.457866667	0.024233333	-4.23986277	0.033814092	1	no	-	--	-	-	-	-
Unigene0024072	0.666666667	4.666666667	0.096	0	0.0995	0.2401	0.558	0.612	0.065166667	0.470033333	2.850556965	0.033845328	1	no	-	--	-	-	-	-
Unigene0070373	1.666666667	12.66666667	0.1976	0.2886	0	0	0.9195	2.7013	0.162066667	1.206933333	2.896686691	0.033871746	1	no	-	--	-	-	-	-
Unigene0073199	1	5	0.1215	0.1183	0.1259	0.7601	0.8478	0.4428	0.1219	0.683566667	2.487383921	0.033874555	1	notest	-	--	-	-	-	-
Unigene0000511	6.666666667	22.33333333	0.1331	0.3023	0.4598	0.222	2.425	0.6467	0.2984	1.0979	1.879427215	0.033877283	1	no	-	--	-	-	-	-
Unigene0009511	80	32	1.6133	2.1503	0.8162	0.6489	0.3574	0.9275	1.5266	0.6446	-1.243846003	0.033966239	1	no	MMP23	PREDICTED: matrix metalloproteinase-23-like isoform X1 [Sinocyclocheilus rhinocerous]	-	-	-	-
Unigene0069583	0.333333333	4	0	0.1156	0	0.5944	0.1381	0.7575	0.038533333	0.496666667	3.688099028	0.033980145	1	no	-	--	-	-	-	-
Unigene0059207	5	0.666666667	0.5965	0.2323	0.9892	0.1493	0.1388	0	0.606	0.096033333	-2.657710634	0.034021818	1	no	-	--	-	-	-	-
Unigene0050842	3	10	0.2833	0.2758	0.0734	0.8861	0.4118	0.9678	0.210833333	0.755233333	1.840819462	0.03407447	1	no	TTN	PREDICTED: obscurin, partial [Danio rerio]	-	-	-	-
Unigene0064124	4.333333333	13	0.1341	0.3917	0.3475	1.5941	0.4679	0.8553	0.2911	0.972433333	1.740084508	0.034086371	1	no	-	--	-	-	-	-
Unigene0040396	6	16.66666667	0.2976	0.507	0.5398	0.9309	0.9518	1.9658	0.448133333	1.282833333	1.5173338	0.034100736	1	no	-	--	-	-	-	-
Unigene0046546	239.3333333	99.33333333	2.0826	0.6732	3.0401	0.4973	0.7026	1.2457	1.931966667	0.8152	-1.244844246	0.034111841	1	no	vwa2	PREDICTED: von Willebrand factor A domain-containing protein 2-like [Sinocyclocheilus rhinocerous]	-	-	-	-
Unigene0063630	2	8	0	0.2456	0.2614	0.8417	0.7823	0.6129	0.169	0.745633333	2.14144311	0.034119435	1	no	-	--	-	-	-	-
Unigene0060482	6.333333333	1	1.1191	0.3632	0.9022	0.3112	0	0.1133	0.794833333	0.1415	-2.489850324	0.034121359	1	no	-	--	-	-	-	-
Unigene0016698	6.666666667	0.666666667	0.2879	1.4013	0.1989	0.2401	0	0	0.629366667	0.080033333	-2.975227868	0.034134463	1	no	-	--	-	-	-	-
Unigene0038133	89.66666667	170.3333333	1.1448	1.9629	1.4877	4.9604	1.9476	2.8179	1.5318	3.241966667	1.081641314	0.03416546	1	no	-	--	-	-	-	-
Unigene0072985	1.333333333	6.333333333	0	0.0918	0.2931	0.8256	0.6577	0.5153	0.1283	0.6662	2.376434184	0.034405071	1	notest	-	--	-	-	-	-
Unigene0070534	3.666666667	12	0.3628	0.3532	0.0752	0.454	0.9283	1.3223	0.263733333	0.901533333	1.77330091	0.034415599	1	no	-	--	-	-	-	-
Unigene0044218	21.66666667	46.33333333	0.5054	1.2466	0.4191	1.9817	1.8419	1.3816	0.7237	1.735066667	1.26152742	0.034444199	1	no	-	--	-	-	-	-
Unigene0049275	2.333333333	9	0.2749	0.2677	0.095	1.3761	0.4263	0.9185	0.212533333	0.906966667	2.0933604	0.034478668	1	no	-	--	-	-	-	-
Unigene0009392	9.333333333	25	0.383	0.2868	0.1527	1.7326	0.4112	0.4295	0.274166667	0.857766667	1.645532075	0.03450069	1	no	-	--	-	-	-	-
Unigene0039816	146.3333333	261.6666667	3.4039	3.3139	3.5522	7.9642	4.3114	7.4986	3.423333333	6.5914	0.945183147	0.034567221	1	no	-	--	-	-	-	-
Unigene0069994	5.333333333	0.333333333	0.5442	0	0.9401	0.1135	0	0	0.494766667	0.037833333	-3.70901851	0.034583049	1	no	-	--	-	-	-	-
Unigene0011938	1.333333333	7.333333333	0.1333	0	0.0461	0.6117	0.1034	0.3644	0.0598	0.359833333	2.589111448	0.034611072	1	no	PDE6G	PREDICTED: retinal cone rhodopsin-sensitive cGMP 3',5'-cyclic phosphodiesterase subunit gamma-like [Sinocyclocheilus grahami]	ko00230//Purine metabolism//Nucleotide metabolism//Metabolism	-	GO:1901265//nucleoside phosphate binding;GO:0000166//nucleotide binding;GO:0036094//small molecule binding;GO:0003824//catalytic activity;GO:0097159//organic cyclic compound binding;GO:0042578//phosphoric ester hydrolase activity;GO:0030551//cyclic nucleotide binding;GO:0004112//cyclic-nucleotide phosphodiesterase activity;GO:0016788//hydrolase activity, acting on ester bonds;GO:1901363//heterocy…	GO:0003008//system process;GO:0007600//sensory perception;GO:0032501//multicellular organismal process;GO:0050953//sensory perception of light stimulus;GO:0050877//neurological system process
Unigene0069264	2	10	0.0786	0.2295	0.1629	1.1801	0.0914	1.2173	0.157	0.8296	2.401651335	0.034627904	1	no	-	--	-	-	-	-
Unigene0023470	13.66666667	38.66666667	0.6621	0.1172	1.7469	4.3685	1.9602	1.6453	0.842066667	2.658	1.658334743	0.034677464	1	no	-	--	-	-	-	-
Unigene0068980	10.66666667	82.33333333	1.2786	0.1778	0	0.2286	0.3187	9.8606	0.485466667	3.4693	2.837200455	0.034703877	1	no	pvalb2	PREDICTED: parvalbumin alpha-like [Ictalurus punctatus]	-	-	GO:0046872//metal ion binding;GO:0043167//ion binding;GO:0005488//binding;GO:0043169//cation binding	-
Unigene0062688	4.666666667	13	0.4853	0.3375	0.1437	1.3881	0.7257	0.8844	0.322166667	0.9994	1.633254986	0.034722708	1	no	-	--	-	-	-	-
Unigene0052707	70	129.6666667	1.9192	1.7439	1.724	2.8498	3.6011	4.1735	1.7957	3.541466667	0.979800618	0.034751217	1	no	-	PREDICTED: uncharacterized protein LOC109054703 [Cyprinus carpio]	-	-	-	-
Unigene0071386	7.333333333	26.66666667	0.4815	0.7032	0.1248	2.7115	0.14	2.3035	0.4365	1.718333333	1.976956368	0.034756416	1	no	-	--	-	-	-	-
Unigene0003826	22.66666667	8.333333333	1.1859	0.8178	1.3828	0.371	0.3448	0.5853	1.128833333	0.4337	-1.380063147	0.034826308	1	no	-	--	-	-	-	-
Unigene0012914	2.333333333	10	0.2703	0.0658	0.1401	0.3382	0.5501	1.1696	0.158733333	0.685966667	2.111533353	0.034833596	1	no	-	--	-	-	-	-
Unigene0060086	35.66666667	79.66666667	0.4472	0.9301	0.8006	3.2555	1.9858	0.5	0.725966667	1.913766667	1.39843973	0.034859179	1	no	-	--	-	-	-	-
Unigene0002671	7.333333333	17.66666667	0.409	0.2987	0.424	0.8957	1.0704	0.9783	0.377233333	0.981466667	1.379482109	0.034950294	1	no	ZNF615	PREDICTED: zinc finger protein 239-like [Cyprinus carpio]	-	-	-	-
Unigene0062515	2.666666667	0	0.1215	0.2366	0.6296	0	0	0	0.329233333	0.001	-8.362966599	0.034962403	1	no	-	--	-	-	-	-
Unigene0032045	1	7.333333333	0.1872	0.0911	0	0.1171	0.5442	1.3643	0.092766667	0.6752	2.863636496	0.034964926	1	no	-	PREDICTED: L-threonine ammonia-lyase-like [Sinocyclocheilus anshuiensis]	ko01100//Metabolic pathways//Global and Overview//Metabolism;ko01110//Biosynthesis of secondary metabolites//Global and Overview//Metabolism;ko01130//Biosynthesis of antibiotics//Global and Overview//Metabolism;ko01200//Carbon metabolism//Global and Overview//Metabolism;ko01230//Biosynthesis of amino acids//Global and Overview//Metabolism;ko00260//Glycine, serine and threonine metabolism//Amino a…	-	-	-
Unigene0009382	20.66666667	42.66666667	2.1433	1.565	1.0314	3.6397	3.6501	3.4175	1.5799	3.5691	1.175727078	0.034970889	1	no	drl	PREDICTED: oocyte zinc finger protein XlCOF6-like [Sinocyclocheilus rhinocerous]	-	-	-	-
Unigene0006068	0	3	0	0	0	0	0.305	0.4779	0.001	0.260966667	8.027721733	0.034989137	1	no	-	PREDICTED: uncharacterized protein LOC109065191 [Cyprinus carpio]	-	-	-	-
Unigene0069989	6.333333333	1	0.8583	0.955	0.5084	0	0	0.3352	0.7739	0.111733333	-2.792087511	0.034990396	1	no	-	--	-	-	-	-
Unigene0023273	2.666666667	10	0.3784	0.2763	0.098	0.5918	0.8801	1.4651	0.2509	0.979	1.964196389	0.034994143	1	no	-	--	-	-	-	-
Unigene0022305	7.333333333	1.333333333	0.5564	0.65	1.2688	0	0.3883	0.1014	0.825066667	0.163233333	-2.337575001	0.035006962	1	no	-	PREDICTED: uncharacterized protein LOC109112399 [Cyprinus carpio]	-	-	-	-
Unigene0003976	4	12.33333333	0.3555	0.4326	0.2764	0.4448	1.8606	1.2147	0.354833333	1.173366667	1.725440464	0.035015593	1	no	-	--	-	-	-	-
Unigene0061825	3.666666667	11.66666667	0.081	0.4731	0.3358	0.6081	1.1304	1.2545	0.296633333	0.997666667	1.749877147	0.035021276	1	no	-	--	-	-	-	-
Unigene0033617	29.66666667	72	0.5518	0.2489	0.4045	0.9093	0.407	1.6676	0.401733333	0.994633333	1.307926609	0.035039932	1	no	C10orf71	PREDICTED: uncharacterized protein LOC107709005 [Sinocyclocheilus rhinocerous]	-	-	-	-
Unigene0014335	73	155.6666667	1.0789	3.2262	1.278	6.9109	2.1511	4.2131	1.861033333	4.425033333	1.249584427	0.035066243	1	no	lce	PREDICTED: low choriolytic enzyme-like [Sinocyclocheilus rhinocerous]	-	-	GO:0046914//transition metal ion binding;GO:0043169//cation binding;GO:0070011//peptidase activity, acting on L-amino acid peptides;GO:0046872//metal ion binding;GO:0008233//peptidase activity;GO:0003824//catalytic activity;GO:0005488//binding;GO:0043167//ion binding;GO:0004175//endopeptidase activity;GO:0016787//hydrolase activity	GO:0051604//protein maturation;GO:0016485//protein processing;GO:0006508//proteolysis;GO:0019538//protein metabolic process;GO:0010467//gene expression;GO:0044238//primary metabolic process;GO:0008152//metabolic process;GO:0043170//macromolecule metabolic process;GO:0071704//organic substance metabolic process
Unigene0025643	2.666666667	0	0.164	0.0798	0.4249	0	0	0	0.2229	0.001	-7.800252806	0.035067167	1	no	-	--	-	-	-	-
Unigene0036656	4.666666667	13.33333333	0.7023	0.0977	0.6239	1.7574	1.5168	1.1883	0.474633333	1.4875	1.648004339	0.035079253	1	no	-	Repetin, partial [Chaetura pelagica]	-	-	-	-
Unigene0014542	8.666666667	2	0.6993	1.1063	0.453	0.1094	0.1017	0.3186	0.752866667	0.176566667	-2.092181377	0.035102629	1	no	-	--	-	-	-	-
Unigene0047591	7.333333333	29	0.0459	0.4473	0	1.7533	0.4275	0.2093	0.1644	0.7967	2.276826276	0.035125315	1	no	-	--	-	-	-	-
Unigene0046780	3.666666667	0.333333333	0.251	0.4888	0.6505	0	0	0.1144	0.463433333	0.038133333	-3.603237265	0.03512994	1	no	-	--	-	-	-	-
Unigene0050359	27	59	1.5786	2.5614	0.5454	5.1942	3.1959	3.143	1.5618	3.844366667	1.299536226	0.035215347	1	no	-	--	-	-	-	-
Unigene0043921	4	0.333333333	0.6188	0.6024	0.2566	0	0.1439	0	0.4926	0.047966667	-3.360312536	0.035257793	1	no	-	--	-	-	-	-
Unigene0012844	3	10.33333333	0.4786	0.1553	0.0827	0.3993	1.2989	0.9449	0.238866667	0.881033333	1.882991061	0.035258488	1	no	-	--	-	-	-	-
Unigene0060045	24	7.333333333	0.5048	0.7183	1.61	0.0486	0.4065	0.4246	0.944366667	0.293233333	-1.687298008	0.035294516	1	no	Lrp1b	PREDICTED: low-density lipoprotein receptor-related protein 1B-like [Sinocyclocheilus anshuiensis]	-	-	-	-
Unigene0014823	6.333333333	17.33333333	0.5758	0.3363	0.179	0.8645	0.8705	1.4164	0.3637	1.050466667	1.530209552	0.035314791	1	no	-	--	-	-	-	-
Unigene0065740	20	54	0.5364	2.9375	0.4865	7.8027	1.9496	2.6881	1.320133333	4.1468	1.651314819	0.035344223	1	no	-	--	-	-	-	-
Unigene0024724	5	14.33333333	0.4791	0.4664	0.0709	1.627	1.0347	0.6859	0.3388	1.115866667	1.719658872	0.035347791	1	no	-	--	-	-	-	-
Unigene0053048	7	1.333333333	0.3204	0.8318	1.1069	0.1336	0.2484	0.0973	0.753033333	0.159766667	-2.236747289	0.035360117	1	no	-	--	-	-	-	-
Unigene0016410	12	2.666666667	0.291	1.4167	1.81	0	0.1128	0.6188	1.172566667	0.243866667	-2.26550547	0.035389688	1	no	-	--	-	-	-	-
Unigene0072524	4	11.66666667	0.1062	0.31	0.22	1.1954	0.4938	0.4352	0.212066667	0.708133333	1.739503158	0.035400461	1	notest	-	--	-	-	-	-
Unigene0053303	221.6666667	388.3333333	5.4037	6.5381	2.7659	11.492	8.5866	8.5098	4.902566667	9.529466667	0.958858225	0.035404615	1	no	-	--	-	-	-	-
Unigene0011074	11.66666667	27.66666667	0.1812	0.6468	0.2191	1.0581	0.9132	0.798	0.349033333	0.9231	1.403122121	0.035466642	1	no	-	--	-	-	-	-
Unigene0072789	1	5.333333333	0.1286	0	0.2665	1.1261	0.7476	0.4686	0.1317	0.780766667	2.567636116	0.035467784	1	notest	-	--	-	-	-	-
Unigene0064067	24.33333333	8	1.8109	1.3774	0.9385	0.4957	0.7898	0.2578	1.3756	0.514433333	-1.419004989	0.03548968	1	no	-	PREDICTED: sarcosine dehydrogenase, mitochondrial [Ictalurus punctatus]	-	-	-	-
Unigene0047908	436.6666667	799.3333333	26.2409	91.2557	41.3665	98.3521	137.5495	87.2959	52.95436667	107.7325	1.024631978	0.03551196	1	no	H2-Eb1	MHC class II antigen, partial [Carassius gibelio]	ko04514//Cell adhesion molecules (CAMs)//Signaling molecules and interaction//Environmental Information Processing;ko04145//Phagosome//Transport and catabolism//Cellular Processes;ko04672//Intestinal immune network for IgA production//Immune system//Organismal Systems	-	-	-
Unigene0064935	1.666666667	8	0.2014	0.2941	0	1.1341	0.3514	1.1011	0.165166667	0.8622	2.384100006	0.035515913	1	no	-	--	-	-	-	-
Unigene0042275	15.33333333	3	1.1884	0.1653	2.6395	0.4249	0.3949	0.0773	1.331066667	0.299033333	-2.154204615	0.035575131	1	no	-	--	-	-	-	-
Unigene0053775	0.666666667	4.333333333	0	0.1097	0.1168	0.8461	0.5243	0.3081	0.0755	0.5595	2.889589582	0.035644289	1	no	-	--	-	-	-	-
Unigene0032624	18.33333333	4.333333333	1.7282	0.4627	0.1791	0.0541	0.1005	0.3937	0.79	0.182766667	-2.11184968	0.035683606	1	no	-	--	-	-	-	-
Unigene0061434	0.333333333	3.666666667	0	0	0.112	0.6763	0.2515	0.394	0.037333333	0.4406	3.560933263	0.035759656	1	no	HCN4	PREDICTED: potassium/sodium hyperpolarization-activated cyclic nucleotide-gated channel 1-like [Sinocyclocheilus grahami]	-	-	-	-
Unigene0027770	7	17.33333333	0.5581	0.2964	0.2104	1.1428	0.9442	0.8321	0.354966667	0.973033333	1.454805675	0.035772935	1	no	-	--	-	-	-	-
Unigene0058893	4137.333333	6731	7.8407	11.2384	5.9258	22.264	9.8059	13.3151	8.334966667	15.12833333	0.860004722	0.035829331	1	no	SACS	PREDICTED: sacsin-like [Sinocyclocheilus rhinocerous]	-	-	-	-
Unigene0072671	1.333333333	7	0.1215	0	0.3778	1.0641	0.4239	1.2176	0.166433333	0.901866667	2.437969753	0.035854083	1	notest	-	--	-	-	-	-
Unigene0061942	4	12.66666667	0.5245	0.1702	0.3624	2.0781	0.4066	1.1946	0.352366667	1.226433333	1.799319455	0.035873081	1	no	-	reverse transcriptase [Oryzias latipes]	-	-	-	-
Unigene0058740	65	24	1.312	0.6785	2.061	0.1539	0.3815	0.9339	1.3505	0.489766667	-1.463327147	0.035906981	1	no	cnp-2	PREDICTED: C-type natriuretic peptide 2-like [Danio rerio]	ko04270//Vascular smooth muscle contraction//Circulatory system//Organismal Systems	-	-	-
Unigene0047449	5.666666667	0.666666667	0.8903	0.2167	0.8074	0.2785	0	0	0.638133333	0.092833333	-2.781143069	0.035922403	1	no	-	--	-	-	-	-
Unigene0058894	551.6666667	232.3333333	1.4184	6.0284	2.335	1.8196	1.1298	1.5747	3.2606	1.508033333	-1.112469149	0.035955501	1	no	Fbn2	PREDICTED: LOW QUALITY PROTEIN: fibrillin-2 [Sinocyclocheilus anshuiensis]	-	-	-	-
Unigene0021046	3.666666667	10.66666667	0.2147	0.2788	0.2968	0.627	0.8325	0.9783	0.263433333	0.8126	1.625107457	0.036013026	1	no	-	PREDICTED: C-C chemokine receptor type 5-like isoform X1 [Cyprinus carpio]	-	-	-	-
Unigene0009552	106	202.3333333	1.6096	4.3924	1.6936	5.8286	5.4175	4.9996	2.5652	5.415233333	1.07795219	0.036040717	1	no	-	--	-	-	-	-
Unigene0023066	57	127	1.193	1.3938	0.8037	6.3693	1.8732	0.7971	1.130166667	3.0132	1.414760891	0.036091019	1	no	ELOVL4	PREDICTED: elongation of very long chain fatty acids protein 4-like isoform X1 [Sinocyclocheilus grahami]	ko01110//Biosynthesis of secondary metabolites//Global and Overview//Metabolism;ko00062//Fatty acid elongation//Lipid metabolism//Metabolism	GO:0044425//membrane part;GO:0016020//membrane;GO:0031224//intrinsic component of membrane	-	-
Unigene0036838	2.666666667	9	0.2145	0.3132	0.3334	1.3417	0.7483	1.0747	0.287033333	1.0549	1.877816051	0.03612235	1	no	-	--	-	-	-	-
Unigene0073177	6.333333333	1.333333333	0.7476	0.7278	0.5535	0.1336	0.1242	0.1946	0.6763	0.1508	-2.165026925	0.036125061	1	notest	-	--	-	-	-	-
Unigene0011309	35.66666667	11.66666667	1.2779	1.6796	0.4305	0.5197	0.483	0.262	1.129333333	0.421566667	-1.421638671	0.036141535	1	no	TNNI1	PREDICTED: troponin I, slow skeletal muscle-like [Cyprinus carpio]	-	GO:0043228//non-membrane-bounded organelle;GO:0044449//contractile fiber part;GO:0005737//cytoplasm;GO:0005622//intracellular;GO:0044424//intracellular part;GO:0044430//cytoskeletal part;GO:0005865//striated muscle thin filament;GO:0044422//organelle part;GO:0044446//intracellular organelle part;GO:0030016//myofibril;GO:0030017//sarcomere;GO:0015629//actin cytoskeleton;GO:0043229//intracellular o…	-	-
Unigene0061787	23	8.333333333	0.5121	0.926	1.0996	0.2746	0.2553	0.4333	0.8459	0.321066667	-1.397614231	0.036161838	1	no	EEF1A2	PREDICTED: elongation factor 1-alpha 2-like [Cyprinus carpio]	ko03013//RNA transport//Translation//Genetic Information Processing	GO:0005623//cell;GO:0044424//intracellular part;GO:0044464//cell part;GO:0005622//intracellular	GO:0032550//purine ribonucleoside binding;GO:0097159//organic cyclic compound binding;GO:0008135//translation factor activity, RNA binding;GO:0016817//hydrolase activity, acting on acid anhydrides;GO:0003824//catalytic activity;GO:0097367//carbohydrate derivative binding;GO:0001882//nucleoside binding;GO:0032549//ribonucleoside binding;GO:0017111//nucleoside-triphosphatase activity;GO:0016787//hy…	GO:0008152//metabolic process;GO:0009150//purine ribonucleotide metabolic process;GO:0006163//purine nucleotide metabolic process;GO:0043170//macromolecule metabolic process;GO:0019637//organophosphate metabolic process;GO:0006807//nitrogen compound metabolic process;GO:1901566//organonitrogen compound biosynthetic process;GO:0009059//macromolecule biosynthetic process;GO:0034655//nucleobase-cont…
Unigene0041728	3	0	0.3327	0	0.2759	0	0	0	0.202866667	0.001	-7.664388023	0.036174718	1	no	otol1	PREDICTED: inner ear-specific collagen-like [Sinocyclocheilus anshuiensis]	-	-	-	-
Unigene0018102	3	0	0.4459	0	0.3697	0	0	0	0.271866667	0.001	-8.086755464	0.036179664	1	no	-	--	-	-	-	-
Unigene0050553	3.333333333	10.66666667	0.1742	0.1696	0.0903	0.8176	0.2027	0.516	0.1447	0.5121	1.823360637	0.036186939	1	no	-	--	-	-	-	-
Unigene0005209	1.333333333	6.666666667	0	0.0973	0.3108	1.3756	0.465	0.4553	0.136033333	0.7653	2.49206519	0.036226625	1	no	-	--	-	-	-	-
Unigene0027917	1.333333333	7	0	0.1177	0.376	1.6646	0.422	0.7713	0.164566667	0.952633333	2.533248886	0.036227273	1	no	-	--	-	-	-	-
Unigene0071063	7.333333333	18.66666667	0.214	0.6251	0.3327	1.5399	0.7467	1.0238	0.3906	1.103466667	1.498279195	0.036233616	1	no	-	--	-	-	-	-
Unigene0004703	6.666666667	16.66666667	0.4646	0.9047	0.4816	1.6279	2.0535	1.4394	0.616966667	1.706933333	1.468142262	0.036276272	1	no	-	--	-	-	-	-
Unigene0052621	9	27.33333333	0.4194	0.9334	0.2484	0.6748	4.2511	0.6552	0.533733333	1.860366667	1.801395975	0.036285827	1	no	-	hypothetical protein cypCar_00024923 [Cyprinus carpio]	-	-	-	-
Unigene0073227	1	6.666666667	0	0.1674	0.0891	0.9684	0.1	0.7835	0.0855	0.6173	2.851975466	0.036289599	1	notest	-	--	-	-	-	-
Unigene0040419	69	158	1.9544	2.293	0.909	7.3367	6.0033	0.7762	1.7188	4.7054	1.452915688	0.036329507	1	no	-	PREDICTED: membrane-spanning 4-domains subfamily A member 4A-like [Sinocyclocheilus rhinocerous]	-	-	-	-
Unigene0067147	9.333333333	1	0.33	0	2.0524	0.1032	0	0.1504	0.794133333	0.084533333	-3.231789008	0.036343758	1	no	LCT	PREDICTED: lactase-phlorizin hydrolase-like [Sinocyclocheilus rhinocerous]	ko01100//Metabolic pathways//Global and Overview//Metabolism;ko00052//Galactose metabolism//Carbohydrate metabolism//Metabolism	-	-	-
Unigene0072299	3	0	0	0.5106	0.6795	0	0	0	0.3967	0.001	-8.631904587	0.036353783	1	no	-	--	-	-	-	-
Unigene0001904	6.666666667	18.33333333	0.1758	0.6845	0.3037	0.9532	0.9541	1.4949	0.388	1.134066667	1.547376895	0.036393135	1	no	-	--	-	-	-	-
Unigene0034566	59.66666667	24.66666667	1.2691	0.7899	1.7036	0.4946	0.7017	0.4929	1.2542	0.563066667	-1.155389773	0.036431966	1	no	MORC3	PREDICTED: MORC family CW-type zinc finger protein 1-like [Cyprinus carpio]	-	-	-	-
Unigene0015279	7	17.33333333	0.277	0.2697	0.6317	1.1093	1.2244	0.8582	0.3928	1.063966667	1.437586118	0.036436319	1	no	pol	Retrovirus-related Pol polyprotein from transposon 297 [Larimichthys crocea]	-	-	-	-
Unigene0016490	2.333333333	9	0.2868	0	0.3964	1.1964	0.6672	0.9583	0.227733333	0.940633333	2.046286984	0.036480226	1	no	-	--	-	-	-	-
Unigene0000655	172.6666667	320.3333333	1.6915	2.5911	1.8391	7.5339	4.0034	1.7352	2.040566667	4.424166667	1.11643589	0.036501603	1	no	-	PREDICTED: SLAM family member 5-like [Sinocyclocheilus anshuiensis]	-	-	-	-
Unigene0035133	7.333333333	18.66666667	0.4935	0.9609	0.341	1.4409	1.7219	1.7986	0.598466667	1.6538	1.466441975	0.036523289	1	no	-	--	-	-	-	-
Unigene0048902	27.33333333	57	0.7433	0.2666	0.6082	1.1993	1.2967	1.1585	0.539366667	1.218166667	1.175373263	0.036574342	1	no	-	PREDICTED: uncharacterized protein LOC107725790 isoform X3 [Sinocyclocheilus rhinocerous]	-	-	-	-
Unigene0005283	251.3333333	421	2.2185	2.2013	2.0252	4.5162	3.0168	4.167	2.148333333	3.9	0.860256266	0.036576684	1	no	Gimap5	PREDICTED: GTPase IMAP family member 4-like isoform X2 [Sinocyclocheilus rhinocerous]	-	-	-	-
Unigene0048821	5.333333333	14	0.3872	0.2262	0.6421	1.4535	1.4411	0.7762	0.4185	1.2236	1.547832484	0.036626713	1	no	ZNF214	PREDICTED: gastrula zinc finger protein XlCGF57.1-like [Cyprinus carpio]	-	-	-	-
Unigene0042478	1.333333333	8.333333333	0	0	0.4256	2.0552	0.8357	0.1871	0.141866667	1.026	2.854423176	0.036627925	1	no	-	--	-	-	-	-
Unigene0021320	5.666666667	14.33333333	0.5561	0.2707	0.3603	1.1308	1.1319	1.0134	0.3957	1.092033333	1.464537923	0.036655943	1	no	-	PREDICTED: uncharacterized protein LOC107677936 [Sinocyclocheilus anshuiensis]	-	-	-	-
Unigene0071397	16.66666667	4.666666667	0.622	0.6055	1.3967	0.5188	0.1808	0.1417	0.874733333	0.280433333	-1.641185428	0.036711015	1	no	-	--	-	-	-	-
Unigene0020783	23	51.33333333	0.937	0.9426	0.259	1.2115	2.3248	1.679	0.712866667	1.738433333	1.286083575	0.036740513	1	no	-	--	-	-	-	-
Unigene0000551	59.66666667	140.3333333	4.221	2.095	8.7501	27.5479	6.2569	6.787	5.022033333	13.5306	1.429882306	0.036744796	1	no	-	--	-	-	-	-
Unigene0037750	9	26.33333333	1.8356	0.5106	1.2231	4.2656	1.0674	5.4953	1.189766667	3.609433333	1.601093693	0.036750996	1	no	-	--	-	-	-	-
Unigene0066093	1.666666667	6.666666667	0.164	0.1597	0.085	0.8208	0.7629	0.2988	0.136233333	0.6275	2.203535716	0.036826834	1	no	-	--	-	-	-	-
Unigene0070742	10.33333333	2.333333333	0.8364	0.4071	0.9391	0.3488	0.0811	0.127	0.727533333	0.185633333	-1.970557557	0.036838156	1	no	-	--	-	-	-	-
Unigene0020721	0.666666667	5.666666667	0.243	0	0	1.2162	0.1413	0.8856	0.081	0.7477	3.20646572	0.036841116	1	no	-	--	-	-	-	-
Unigene0065175	0	2.666666667	0	0	0	0.4005	0.3722	0	0.001	0.257566667	8.008802087	0.0368626	1	no	-	--	-	-	-	-
Unigene0018871	1.666666667	7.333333333	0.3089	0	0.08	0.773	0.8082	0.3518	0.129633333	0.644333333	2.313370498	0.036864836	1	no	-	--	-	-	-	-
Unigene0051179	47	19	1.731	1.483	1.6865	0.9964	0.6442	0.5678	1.6335	0.736133333	-1.149927449	0.036917059	1	no	-	--	-	-	-	-
Unigene0002649	609.6666667	317.6666667	6.5811	6.0457	5.7606	2.7491	4.0487	3.5375	6.129133333	3.4451	-0.831137229	0.036950078	1	no	gag-pol	PREDICTED: protein NYNRIN-like [Oreochromis niloticus]	-	-	-	-
Unigene0069270	4	11.33333333	0.2879	0.2803	0.2984	1.4409	0.5022	0.7869	0.288866667	0.91	1.655462809	0.036950315	1	no	-	--	-	-	-	-
Unigene0066946	1	6.333333333	0.2464	0	0.1277	2.0038	0.5731	0.2245	0.1247	0.9338	2.904652123	0.036985606	1	no	-	--	-	-	-	-
Unigene0071667	5.666666667	20.66666667	0	0.813	0.1855	1.2689	0.6244	1.9566	0.332833333	1.2833	1.94698664	0.036986352	1	no	-	--	-	-	-	-
[truncated: 71,641 more rows]
