# Supplementary material for: Comparative Analysis of miRNA-mRNA Regulation in the Testes of Gobiocypris rarus following 17α-Methyltestosterone Exposure
Source: Int J Mol Sci. 2023 Feb 20;24(4):4239. doi: 10.3390/ijms24044239 (PMC9968023; doi:10.3390/ijms24044239)
Supplement: Supplementary file 1 [file ijms-24-04239-s001.zip › Table S3-Con-M-VS-MT50-M.annot.xls]

GeneID	Con-M_count	MT50-M_count	Con-M1_rpkm	Con-M2_rpkm	Con-M3_rpkm	MT50-M1_rpkm	MT50-M2_rpkm	MT50-M3_rpkm	Con-M_rpkm	MT50-M_rpkm	log2 Ratio(MT50-M/Con-M)	Pvalue	FDR	significant	Symbol	Description	Pathway	GO Component	GO Function	GO Process
Unigene0000001	10.33333333	12	0.5282	1.6161	0.1564	0.2566	1.966	0.2641	0.7669	0.8289	0.112159593	0.929940035	1	no	Npr1	PREDICTED: atrial natriuretic peptide receptor 1-like [Cyprinus carpio]	ko04270//Vascular smooth muscle contraction//Circulatory system//Organismal Systems;ko00230//Purine metabolism//Nucleotide metabolism//Metabolism	GO:0031224//intrinsic component of membrane;GO:0016020//membrane;GO:0044425//membrane part	GO:0005488//binding;GO:0016772//transferase activity, transferring phosphorus-containing groups;GO:0036094//small molecule binding;GO:0001883//purine nucleoside binding;GO:0009975//cyclase activity;GO:0016301//kinase activity;GO:1901363//heterocyclic compound binding;GO:0016740//transferase activity;GO:0016829//lyase activity;GO:0032549//ribonucleoside binding;GO:0003824//catalytic activity;GO:00…	GO:0009152//purine ribonucleotide biosynthetic process;GO:1901135//carbohydrate derivative metabolic process;GO:0006164//purine nucleotide biosynthetic process;GO:0006753//nucleoside phosphate metabolic process;GO:1901566//organonitrogen compound biosynthetic process;GO:0044711//single-organism biosynthetic process;GO:1901293//nucleoside phosphate biosynthetic process;GO:0044237//cellular metabol…
Unigene0000002	20.33333333	19.33333333	1.8678	0.3264	0.7446	0.733	0.7576	0.9638	0.9796	0.818133333	-0.259856792	0.72839586	1	no	-	--	-	-	-	-
Unigene0000003	8	16.66666667	0.6671	0.6495	0.2766	0.6239	0.9312	1.4009	0.531066667	0.985333333	0.891718885	0.218267625	1	no	Gpr64	PREDICTED: cell wall protein DAN4-like [Sinocyclocheilus anshuiensis]	-	-	-	-
Unigene0000004	1803	2136.333333	12.4757	15.7661	16.5117	14.8766	15.4378	16.4127	14.91783333	15.5757	0.062258988	0.869037307	1	no	PDLIM5	PDZ and LIM domain 5 isoform 2 [Danio rerio]	-	-	GO:0043169//cation binding;GO:0005488//binding;GO:0043167//ion binding	-
Unigene0000005	13.33333333	23	0.949	0.294	0.4918	1.0269	1.2443	0.3774	0.578266667	0.882866667	0.610460631	0.419617419	1	no	ZCCHC24	Zinc finger CCHC domain-containing protein 24 [Dicentrarchus labrax]	-	-	GO:0003723//RNA binding;GO:0005488//binding;GO:0097159//organic cyclic compound binding;GO:0003676//nucleic acid binding;GO:1901363//heterocyclic compound binding;GO:0046872//metal ion binding;GO:0043169//cation binding;GO:0043167//ion binding	-
Unigene0000006	5367.333333	4661	13.8341	9.1379	33.1667	15.1414	6.8929	19.893	18.7129	13.97576667	-0.421105728	0.415582078	1	no	EML6	PREDICTED: echinoderm microtubule-associated protein-like 6 isoform X3 [Sinocyclocheilus grahami]	-	-	-	-
Unigene0000007	31	4.666666667	0.5751	2.0333	0.1569	0.1544	0.0563	0.1589	0.921766667	0.1232	-2.903399341	0.00218773	0.556735192	no	-	--	-	-	-	-
Unigene0000008	87.33333333	73.33333333	0.9859	0.9307	2.0437	1.3844	0.695	0.7972	1.3201	0.958866667	-0.461245097	0.40698838	1	no	-	PREDICTED: tripartite motif-containing protein 35-like [Sinocyclocheilus grahami]	-	-	-	-
Unigene0000009	59.33333333	79.66666667	1.3846	0.8464	0.6341	1.1088	1.4532	0.8593	0.955033333	1.140433333	0.25595912	0.638449819	1	no	-	--	-	-	-	-
Unigene0000010	10.33333333	9.666666667	0.823	0.7284	0.7755	0.1272	0.6266	1.1783	0.775633333	0.644033333	-0.268239445	0.761210595	1	no	-	TCR beta variable region, partial [Ictalurus punctatus]	-	-	-	-
Unigene0000011	461	475	7.2969	8.8992	5.7506	6.4473	8.2102	5.4663	7.315566667	6.707933333	-0.12510127	0.767560355	1	no	-	--	-	-	-	-
Unigene0000012	16	27.33333333	0.8295	1.7305	0.2456	1.2594	2.1503	0.9331	0.9352	1.4476	0.630316178	0.391892835	1	no	-	--	-	-	-	-
Unigene0000013	16.66666667	21.66666667	1.1702	0.2278	0.566	0.4975	0.5444	1.1945	0.654666667	0.745466667	0.18738332	0.804835558	1	no	-	PREDICTED: disks large homolog 5-like [Sinocyclocheilus grahami]	-	-	-	-
Unigene0000014	17.33333333	16.33333333	0.9388	1.0102	0.6146	0.9243	0.8276	0.3891	0.854533333	0.713666667	-0.259886379	0.721155243	1	no	-	--	-	-	-	-
Unigene0000015	452	101.6666667	3.6917	21.625	2.3001	1.975	2.837	0.8347	9.2056	1.882233333	-2.290066272	0.002576545	0.598939266	no	Samsn1	PREDICTED: SAM domain-containing protein SAMSN-1-like isoform X3 [Sinocyclocheilus anshuiensis]	-	-	-	-
Unigene0000016	266	498.3333333	2.1068	2.1108	1.9058	3.7389	4.1064	2.3126	2.041133333	3.385966667	0.730197344	0.090732054	1	no	C3orf58	PREDICTED: deleted in autism protein 1 homolog [Sinocyclocheilus anshuiensis]	-	-	-	-
Unigene0000017	79.33333333	107.6666667	2.0318	4.5114	1.8843	2.4852	4.8428	2.9628	2.809166667	3.430266667	0.288178513	0.608499086	1	no	-	--	-	-	-	-
Unigene0000018	365	461	4.2762	4.4627	2.8595	3.7891	5.7071	3.5743	3.866133333	4.356833333	0.172388532	0.69251612	1	no	GATSL3	GATS-like protein 3 [Danio rerio]	-	-	-	-
Unigene0000019	6	10.33333333	0.7223	0	0.3743	0.2047	0.8402	0.632	0.365533333	0.558966667	0.612759279	0.540451939	1	no	-	pol-like protein [Tetraodon nigroviridis]	ko04080//Neuroactive ligand-receptor interaction//Signaling molecules and interaction//Environmental Information Processing	-	-	-
Unigene0000020	14	31	0.6008	0.8774	0.6227	1.3196	1.4908	1.3141	0.7003	1.374833333	0.973211743	0.106411091	1	no	-	--	-	-	-	-
Unigene0000021	3.666666667	20.33333333	0.291	0.425	0.0754	0.6805	2.3697	0.9549	0.2638	1.335033333	2.339359294	0.008237659	0.956820314	no	-	--	-	-	-	-
Unigene0000022	1289.333333	1571.333333	5.7155	5.3755	8.8119	5.6447	6.0402	9.5592	6.6343	7.081366667	0.094083568	0.82231366	1	no	fgfr1a	PREDICTED: LOW QUALITY PROTEIN: fibroblast growth factor receptor 1-A-like [Cyprinus carpio]	ko04010//MAPK signaling pathway//Signal transduction//Environmental Information Processing;ko04810//Regulation of actin cytoskeleton//Cell motility//Cellular Processes;ko04520//Adherens junction//Cellular commiunity//Cellular Processes	GO:0043226//organelle;GO:0043227//membrane-bounded organelle;GO:0044425//membrane part;GO:0005622//intracellular;GO:0005623//cell;GO:0044424//intracellular part;GO:0016020//membrane;GO:0043229//intracellular organelle;GO:0044444//cytoplasmic part;GO:0005737//cytoplasm;GO:0043231//intracellular membrane-bounded organelle;GO:0031982//vesicle;GO:0044464//cell part;GO:0031224//intrinsic component of …	GO:0001883//purine nucleoside binding;GO:0004888//transmembrane signaling receptor activity;GO:0019199//transmembrane receptor protein kinase activity;GO:0032549//ribonucleoside binding;GO:0019838//growth factor binding;GO:0097367//carbohydrate derivative binding;GO:0004714//transmembrane receptor protein tyrosine kinase activity;GO:0016772//transferase activity, transferring phosphorus-containin…	GO:0048646//anatomical structure formation involved in morphogenesis;GO:0009653//anatomical structure morphogenesis;GO:0050790//regulation of catalytic activity;GO:0048736//appendage development;GO:0050789//regulation of biological process;GO:0065009//regulation of molecular function;GO:0009888//tissue development;GO:0045859//regulation of protein kinase activity;GO:0043405//regulation of MAP kin…
Unigene0000023	4.666666667	6.333333333	0.2968	0.0722	0.692	0.1262	0.8284	0.3245	0.353666667	0.426366667	0.269704402	0.861602772	1	no	-	--	-	-	-	-
Unigene0000024	1091	1460	3.8372	6.42	3.1697	5.5682	6.704	3.7611	4.475633333	5.344433333	0.25594514	0.557554924	1	no	myo1c	PREDICTED: unconventional myosin-Ic-like [Cyprinus carpio]	-	-	-	-
Unigene0000025	332.6666667	322.6666667	3.127	2.5209	3.3432	1.813	2.5512	3.3238	2.997033333	2.562666667	-0.225889294	0.608214909	1	no	-	--	-	-	-	-
Unigene0000026	3276	3762	21.1966	21.0839	18.0782	20.7499	21.5567	18.9588	20.11956667	20.4218	0.0215108	0.953063578	1	no	Uso1	PREDICTED: general vesicular transport factor p115 isoform X3 [Sinocyclocheilus anshuiensis]	-	GO:0012505//endomembrane system;GO:0044424//intracellular part;GO:0044422//organelle part;GO:0005623//cell;GO:0044464//cell part;GO:0044446//intracellular organelle part;GO:0005794//Golgi apparatus;GO:0043226//organelle;GO:0043229//intracellular organelle;GO:0044444//cytoplasmic part;GO:0043227//membrane-bounded organelle;GO:0043231//intracellular membrane-bounded organelle;GO:0005737//cytoplasm;…	-	GO:0061024//membrane organization;GO:1902589//single-organism organelle organization;GO:0016050//vesicle organization;GO:0046907//intracellular transport;GO:0044801//single-organism membrane fusion;GO:0048193//Golgi vesicle transport;GO:0044765//single-organism transport;GO:0071840//cellular component organization or biogenesis;GO:0016043//cellular component organization;GO:0051649//establishment…
Unigene0000027	12.66666667	18	0.8583	0.6565	0.8261	0.9904	0.9128	1.0192	0.7803	0.974133333	0.320090353	0.643036636	1	no	-	--	-	-	-	-
Unigene0000028	16.66666667	18.33333333	0.932	0.1512	0.8855	0.7264	0.5782	0.5776	0.656233333	0.6274	-0.064823348	0.938253393	1	no	-	--	-	-	-	-
Unigene0000029	46	37.33333333	0.5741	1.6022	0.4364	0.5857	0.6054	0.7032	0.8709	0.631433333	-0.46387665	0.460901856	1	no	-	--	-	-	-	-
Unigene0000030	11	10	0.3153	0.9209	0.8497	0.8042	0.176	0.6621	0.6953	0.547433333	-0.344952306	0.721619125	1	no	-	--	-	-	-	-
Unigene0000031	673.3333333	708.6666667	11.6081	2.8288	15.3744	10.5982	3.3122	13.0036	9.9371	8.971333333	-0.147502467	0.810088127	1	no	-	PREDICTED: leucine-rich repeat and IQ domain-containing protein 3 isoform X1 [Danio rerio]	-	-	-	-
Unigene0000032	13	12	0.6083	1.0022	0.194	0.4376	0.7402	0.3275	0.6015	0.501766667	-0.261548105	0.757426157	1	no	pol	PREDICTED: RNA-directed DNA polymerase from mobile element jockey-like [Poecilia formosa]	-	-	-	-
Unigene0000033	701	614.6666667	8.5216	6.7577	5.7743	4.6856	6.5708	5.1368	7.017866667	5.4644	-0.360969444	0.382904481	1	no	MKX	PREDICTED: homeobox protein Mohawk-like isoform X2 [Sinocyclocheilus rhinocerous]	-	GO:0043231//intracellular membrane-bounded organelle;GO:0043227//membrane-bounded organelle;GO:0005622//intracellular;GO:0005623//cell;GO:0043229//intracellular organelle;GO:0044424//intracellular part;GO:0044464//cell part;GO:0043226//organelle	GO:0001071//nucleic acid binding transcription factor activity;GO:1901363//heterocyclic compound binding;GO:0003676//nucleic acid binding;GO:0005488//binding;GO:0097159//organic cyclic compound binding	GO:0071704//organic substance metabolic process;GO:0044707//single-multicellular organism process;GO:0032774//RNA biosynthetic process;GO:0009653//anatomical structure morphogenesis;GO:1901362//organic cyclic compound biosynthetic process;GO:1901360//organic cyclic compound metabolic process;GO:0044249//cellular biosynthetic process;GO:0044699//single-organism process;GO:0044237//cellular metabol…
Unigene0000034	48.66666667	58.33333333	0.6879	1.494	1.7003	0.6299	1.231	2.2455	1.294066667	1.3688	0.080999722	0.906619623	1	no	gag-pol	PREDICTED: RNA-directed DNA polymerase from mobile element jockey-like [Danio rerio]	-	-	-	-
Unigene0000035	8	10.66666667	0.2927	0.7835	0.6825	0.0622	0.6808	1.3443	0.586233333	0.695766667	0.247128561	0.864195897	1	no	-	--	-	-	-	-
Unigene0000036	130.3333333	173.3333333	1.7665	2.2357	0.9024	1.9096	2.5244	1.4021	1.634866667	1.945366667	0.250869123	0.628794526	1	no	LGI2	PREDICTED: leucine-rich repeat LGI family member 2-like [Cyprinus carpio]	-	-	-	-
Unigene0000037	12.66666667	11.66666667	0.6408	0.7624	1.3283	0.6659	0.9275	0.6229	0.9105	0.738766667	-0.301540244	0.682280142	1	no	-	PREDICTED: junctional adhesion molecule C-like isoform X2 [Sinocyclocheilus rhinocerous]	-	-	-	-
Unigene0000038	12.33333333	12.66666667	1.1416	1.3337	0.3155	1.4883	0.7082	0.3329	0.930266667	0.843133333	-0.141883536	0.881469992	1	no	-	--	-	-	-	-
Unigene0000039	22	15	1.5407	1.4285	1.901	0.1248	1.7067	1.1554	1.6234	0.995633333	-0.705332082	0.369537919	1	no	-	--	-	-	-	-
Unigene0000040	30	32	1.1035	1.0744	1.0331	0.908	0.9606	1.1524	1.070333333	1.007	-0.087996481	0.88590273	1	no	-	--	-	-	-	-
Unigene0000041	36.33333333	37	1.1035	0.9465	0.817	0.6032	1.1002	0.8966	0.955666667	0.866666667	-0.141030281	0.81171554	1	no	-	--	-	-	-	-
Unigene0000042	0	0.666666667	0	0	0	0	0.1287	0	0.001	0.0429	5.422905743	0.560326882	1	no	-	--	-	-	-	-
Unigene0000043	101	105.3333333	1.0605	1.497	1.4701	0.9467	1.4555	1.3222	1.342533333	1.241466667	-0.112912383	0.818165758	1	no	Bscl2	PREDICTED: seipin-like isoform X2 [Sinocyclocheilus anshuiensis]	-	-	-	-
Unigene0000044	22.66666667	11	0.5701	0.7064	2.31	0.8813	0.2894	0.3174	1.1955	0.496033333	-1.269105152	0.105417493	1	no	-	--	-	-	-	-
Unigene0000045	7.666666667	1.333333333	0.4893	0.5359	0.3804	0.052	0.1708	0	0.468533333	0.074266667	-2.657364959	0.016361886	1	no	-	--	-	-	-	-
Unigene0000046	2951.666667	2803.666667	70.6537	71.8433	98.8297	67.0711	57.5308	76.1755	80.44223333	66.9258	-0.265390657	0.484498878	1	no	POLR2F	PREDICTED: DNA-directed RNA polymerases I, II, and III subunit RPABC2 [Sinocyclocheilus rhinocerous]	ko01100//Metabolic pathways//Global and Overview//Metabolism;ko00230//Purine metabolism//Nucleotide metabolism//Metabolism;ko00240//Pyrimidine metabolism//Nucleotide metabolism//Metabolism;ko04623//Cytosolic DNA-sensing pathway//Immune system//Organismal Systems;ko03020//RNA polymerase//Transcription//Genetic Information Processing	GO:1990234//transferase complex;GO:0044446//intracellular organelle part;GO:0044464//cell part;GO:0070013//intracellular organelle lumen;GO:0044428//nuclear part;GO:0044424//intracellular part;GO:0061695//transferase complex, transferring phosphorus-containing groups;GO:0043234//protein complex;GO:0031974//membrane-enclosed lumen;GO:0044451//nucleoplasm part;GO:0044422//organelle part;GO:0005622/…	GO:0003676//nucleic acid binding;GO:0097159//organic cyclic compound binding;GO:0003899//DNA-directed RNA polymerase activity;GO:0034062//RNA polymerase activity;GO:0016772//transferase activity, transferring phosphorus-containing groups;GO:1901363//heterocyclic compound binding;GO:0016779//nucleotidyltransferase activity;GO:0016740//transferase activity;GO:0003824//catalytic activity;GO:0005488/…	GO:0071704//organic substance metabolic process;GO:0043170//macromolecule metabolic process;GO:0010467//gene expression;GO:0008152//metabolic process
Unigene0000047	2362.333333	2669	16.0638	14.4937	16.7393	16.2741	15.1273	15.5898	15.7656	15.66373333	-0.009351967	0.980086286	1	no	fam91a1	protein FAM91A1 [Danio rerio]	-	-	-	-
Unigene0000048	696.3333333	714.6666667	5.5026	3.5642	6.5159	5.8606	4.3909	3.7143	5.194233333	4.655266667	-0.158047012	0.713975873	1	no	PTK2B	PREDICTED: protein-tyrosine kinase 2-beta-like [Sinocyclocheilus grahami]	ko04020//Calcium signaling pathway//Signal transduction//Environmental Information Processing;ko04912//GnRH signaling pathway//Endocrine system//Organismal Systems	GO:0043226//organelle;GO:0043229//intracellular organelle;GO:0044424//intracellular part;GO:0005924//cell-substrate adherens junction;GO:0044464//cell part;GO:0030054//cell junction;GO:0005622//intracellular;GO:0030055//cell-substrate junction;GO:0043228//non-membrane-bounded organelle;GO:0005623//cell;GO:0043232//intracellular non-membrane-bounded organelle;GO:0005912//adherens junction;GO:00701…	GO:0097159//organic cyclic compound binding;GO:0016740//transferase activity;GO:0016772//transferase activity, transferring phosphorus-containing groups;GO:0005488//binding;GO:1901363//heterocyclic compound binding;GO:0032549//ribonucleoside binding;GO:0001883//purine nucleoside binding;GO:0003824//catalytic activity;GO:0097367//carbohydrate derivative binding;GO:0016301//kinase activity;GO:00600…	GO:0050789//regulation of biological process;GO:0043170//macromolecule metabolic process;GO:0008152//metabolic process;GO:0044238//primary metabolic process;GO:0006796//phosphate-containing compound metabolic process;GO:0006464//cellular protein modification process;GO:0006793//phosphorus metabolic process;GO:0036211//protein modification process;GO:0065007//biological regulation;GO:0009966//regu…
Unigene0000049	206.3333333	256.3333333	2.2634	2.5756	1.1984	1.8828	3.6836	1.1916	2.012466667	2.252666667	0.162668962	0.761100817	1	no	-	--	-	-	-	-
Unigene0000050	1515.333333	1255.666667	10.1435	12.4257	13.8911	9.5546	7.6924	9.2592	12.15343333	8.8354	-0.459996576	0.235611011	1	no	Tank	PREDICTED: TRAF family member-associated NF-kappa-B activator-like isoform X1 [Sinocyclocheilus grahami]	ko04622//RIG-I-like receptor signaling pathway//Immune system//Organismal Systems	-	-	-
Unigene0000051	7.333333333	25.33333333	0.7228	0.1005	0.3211	0.6584	0.7206	2.0778	0.381466667	1.152266667	1.594845733	0.056378368	1	no	-	--	-	-	-	-
Unigene0000052	35.33333333	52.33333333	3.1198	2.9726	0.8944	2.709	3.7061	2.8457	2.328933333	3.086933333	0.406504984	0.511242851	1	no	Znf235	PREDICTED: zinc finger protein 501-like [Sinocyclocheilus rhinocerous]	-	-	-	-
Unigene0000053	77.33333333	67	0.489	1.082	1.0137	0.6048	0.7239	0.6515	0.861566667	0.660066667	-0.38435069	0.468615092	1	no	SYNE1	PREDICTED: nesprin-1-like [Sinocyclocheilus grahami]	-	-	-	-
Unigene0000054	3558	4461.333333	15.0051	12.6756	10.6672	15.3702	15.1586	11.9663	12.78263333	14.16503333	0.148148922	0.689123861	1	no	-	Si:ch211-13c6.2 protein, partial [Danio rerio]	-	-	-	-
Unigene0000055	38	33.33333333	1.2376	1.0175	0.8837	0.7483	0.7934	0.8903	1.046266667	0.810666667	-0.368069877	0.513307912	1	no	-	--	-	-	-	-
Unigene0000056	19.66666667	15.66666667	0.5552	1.1352	1.6114	0.5665	0.2067	1.506	1.1006	0.759733333	-0.534725208	0.520382271	1	no	-	--	-	-	-	-
Unigene0000057	243.6666667	346	11.6905	8.4378	9.4429	14.5666	10.4658	11.7802	9.857066667	12.27086667	0.316006859	0.464516179	1	no	-	--	-	-	-	-
Unigene0000058	6.666666667	8.666666667	0.1463	0.7123	0.6067	0.311	0.4766	0.8962	0.488433333	0.561266667	0.20052472	0.876888155	1	no	-	--	-	-	-	-
Unigene0000059	3223.666667	2649.666667	45.9615	19.0619	61.444	33.2615	13.92	42.449	42.1558	29.87683333	-0.496703894	0.327713834	1	no	cfap97	PREDICTED: cilia- and flagella-associated protein 97-like [Sinocyclocheilus anshuiensis]	-	-	-	-
Unigene0000060	14	21	0.6601	0.4418	0.6414	0.5261	1.0365	0.758	0.5811	0.773533333	0.412677007	0.534188195	1	no	-	--	-	-	-	-
Unigene0000061	27	14.66666667	1.9379	0.1935	1.9571	0.4225	0.8785	0.6521	1.362833333	0.651033333	-1.065805822	0.187142708	1	no	-	--	-	-	-	-
Unigene0000062	13.33333333	18	1.4118	0.8247	0	1.7765	0.8408	0.0494	0.7455	0.8889	0.253812775	0.842574753	1	no	-	--	-	-	-	-
Unigene0000063	1430	1484	10.7341	15.9448	8.1121	9.9712	13.0729	9.1707	11.597	10.73826667	-0.110990509	0.789482411	1	no	pi4k2a	phosphatidylinositol 4-kinase type 2-alpha [Danio rerio]	ko01100//Metabolic pathways//Global and Overview//Metabolism;ko04070//Phosphatidylinositol signaling system//Signal transduction//Environmental Information Processing;ko00562//Inositol phosphate metabolism//Carbohydrate metabolism//Metabolism	GO:0098590//plasma membrane region;GO:0005623//cell;GO:0043005//neuron projection;GO:0031082//BLOC complex;GO:0018995//host;GO:0031982//vesicle;GO:0043227//membrane-bounded organelle;GO:0044216//other organism cell;GO:0044424//intracellular part;GO:0044218//other organism cell membrane;GO:0044279//other organism membrane;GO:0044456//synapse part;GO:0044444//cytoplasmic part;GO:0097458//neuron par…	GO:0032403//protein complex binding;GO:0001883//purine nucleoside binding;GO:0003824//catalytic activity;GO:0032550//purine ribonucleoside binding;GO:0044877//macromolecular complex binding;GO:0016773//phosphotransferase activity, alcohol group as acceptor;GO:0036094//small molecule binding;GO:0016301//kinase activity;GO:0032549//ribonucleoside binding;GO:0005488//binding;GO:0097159//organic cycl…	GO:0006796//phosphate-containing compound metabolic process;GO:0044237//cellular metabolic process;GO:0009987//cellular process;GO:0008152//metabolic process;GO:0006793//phosphorus metabolic process
Unigene0000064	2.333333333	5.666666667	0.0736	0.2865	0.1525	0.6255	0	0.4506	0.170866667	0.3587	1.069906767	0.365347563	1	no	-	--	-	-	-	-
Unigene0000065	1457.333333	1904.666667	22.1586	31.4859	18.0564	26.4064	33.141	23.9065	23.9003	27.81796667	0.218988244	0.585681939	1	no	NSUN5	PREDICTED: probable 28S rRNA (cytosine-C(5))-methyltransferase isoform X3 [Sinocyclocheilus grahami]	-	-	GO:0003824//catalytic activity	GO:0008152//metabolic process
Unigene0000066	14	15.66666667	0.8613	0.5765	0.8369	1.0069	0.551	0.6594	0.758233333	0.7391	-0.036872308	1	1	no	-	--	-	-	-	-
Unigene0000067	15541	17816.66667	147.0284	156.6238	147.2798	161.1971	148.3835	145.9767	150.3106667	151.8524333	0.014722634	0.96676705	1	no	PRKAR1A	cAMP-dependent protein kinase type I-alpha regulatory subunit [Danio rerio]	ko04910//Insulin signaling pathway//Endocrine system//Organismal Systems;ko04210//Apoptosis//Cell growth and death//Cellular Processes	GO:0044424//intracellular part;GO:0005623//cell;GO:0005622//intracellular;GO:0044464//cell part	GO:0019207//kinase regulator activity;GO:0030234//enzyme regulator activity;GO:0019887//protein kinase regulator activity;GO:0098772//molecular function regulator	GO:0001932//regulation of protein phosphorylation;GO:0031323//regulation of cellular metabolic process;GO:0032268//regulation of cellular protein metabolic process;GO:0019220//regulation of phosphate metabolic process;GO:0031399//regulation of protein modification process;GO:0042325//regulation of phosphorylation;GO:0065007//biological regulation;GO:0051246//regulation of protein metabolic proces…
Unigene0000068	16.33333333	23	0.8786	1.0998	1.1059	0.747	1.9856	1.1531	1.0281	1.295233333	0.333231422	0.611194103	1	no	-	--	-	-	-	-
Unigene0000069	3.333333333	1.666666667	0.4149	0.1346	0.1433	0.0588	0	0.242	0.230933333	0.100266667	-1.203634363	0.429243987	1	no	-	PREDICTED: nicalin-1-like [Cyprinus carpio]	-	-	-	-
Unigene0000070	1.333333333	2	0	0.1185	0.1262	0.0518	0.2833	0	0.081566667	0.1117	0.453577585	0.841736672	1	no	-	PREDICTED: uroplakin-3a-like [Cyprinus carpio]	-	-	-	-
Unigene0000071	56	68	1.2242	1.6502	1.0736	1.4211	1.4239	1.4006	1.316	1.4152	0.104846464	0.852538552	1	no	-	--	-	-	-	-
Unigene0000072	42.33333333	54.33333333	1.1696	2.2405	1.3686	1.5076	2.8086	1.1883	1.5929	1.834833333	0.203993323	0.741007158	1	no	-	--	-	-	-	-
Unigene0000073	7.333333333	8	0.4717	0.1312	0.9081	0.9168	0.1254	0.3538	0.503666667	0.465333333	-0.114204719	0.946092387	1	no	-	--	-	-	-	-
Unigene0000074	10	16.33333333	1.5519	1.3094	0.2145	0.7037	1.3478	2.444	1.025266667	1.4985	0.547519888	0.540726993	1	no	-	PREDICTED: SLAM family member 9-like [Sinocyclocheilus rhinocerous]	-	-	-	-
Unigene0000075	8	7	0.2145	0.8351	0.2223	0.2735	0.3492	0.3753	0.423966667	0.332666667	-0.349873526	0.753062777	1	no	MOB3B	PREDICTED: MOB kinase activator 3B-like [Cyprinus carpio]	-	-	-	-
Unigene0000076	10.66666667	14	0.7461	0.1453	1.5465	1.0783	0.7637	0.9138	0.812633333	0.9186	0.17683224	0.88109492	1	no	-	--	-	-	-	-
Unigene0000077	86	122.6666667	6.6529	5.8601	3.809	6.1413	7.5469	6.985	5.440666667	6.891066667	0.340943873	0.495611367	1	no	-	--	-	-	-	-
Unigene0000078	980.3333333	1090.666667	13.5319	15.6424	11.3261	14.7036	14.6179	10.5735	13.50013333	13.29833333	-0.02172821	0.957552124	1	no	TRAM2	PREDICTED: translocating chain-associated membrane protein 2-like isoform X1 [Cyprinus carpio]	-	GO:0016020//membrane;GO:0044425//membrane part;GO:0031224//intrinsic component of membrane	-	-
Unigene0000079	11.33333333	16.33333333	1.2177	0.2964	1.1044	1.1647	0.9915	1.132	0.872833333	1.096066667	0.328557447	0.686541901	1	no	-	--	-	-	-	-
Unigene0000080	1.666666667	3	0	0.3077	0	0	0.2941	0.2212	0.102566667	0.171766667	0.743888149	0.686572016	1	no	-	PREDICTED: uncharacterized protein LOC107583085 [Sinocyclocheilus grahami]	-	-	-	-
Unigene0000081	446	455.6666667	38.8399	26.5449	29.9534	30.5475	23.9184	31.0002	31.7794	28.4887	-0.157702097	0.705102512	1	no	-	--	-	-	-	-
Unigene0000082	12.66666667	21	0.8364	0.6785	1.1558	1.6592	1.4917	0.7318	0.890233333	1.294233333	0.539842314	0.442382276	1	no	-	--	-	-	-	-
Unigene0000083	9.666666667	7.333333333	0.1463	1.2109	0.7583	0	1.1574	0.3201	0.705166667	0.4925	-0.517840555	0.635450382	1	no	-	--	-	-	-	-
Unigene0000084	122.3333333	147.6666667	1.8956	3.1562	1.4139	2.8016	1.8134	2.2785	2.155233333	2.297833333	0.092430091	0.862781583	1	no	-	--	-	-	-	-
Unigene0000085	5	8.666666667	0.308	0.6746	0.1596	0.4582	0.4299	0.8757	0.380733333	0.587933333	0.626871691	0.536758195	1	no	-	--	-	-	-	-
Unigene0000086	8	17.33333333	0.9848	0.1514	0.1074	0.5729	0.5788	1.2244	0.414533333	0.792033333	0.934073033	0.306504383	1	no	-	--	-	-	-	-
Unigene0000087	1.333333333	4.333333333	0	0.2014	0.0715	0.2932	0.4493	0.0603	0.090966667	0.2676	1.556668222	0.26743129	1	no	-	--	-	-	-	-
Unigene0000088	9.666666667	14.33333333	0.6748	0.2737	0.6994	0.5737	0.8895	0.6888	0.5493	0.717333333	0.38504938	0.59536031	1	no	-	--	-	-	-	-
Unigene0000089	21	17.66666667	1.1782	0.4129	1.4165	0.7613	0.3947	1.0308	1.002533333	0.728933333	-0.459791426	0.510585623	1	no	-	--	-	-	-	-
Unigene0000090	9	17.33333333	0.8408	0.3581	0.2179	0.7149	0.6846	1.0115	0.472266667	0.803666667	0.766995534	0.311055249	1	no	-	--	-	-	-	-
Unigene0000091	15.66666667	25	0.6688	1.8231	0.6239	0.9667	2.0538	1.4629	1.0386	1.494466667	0.524990588	0.47035915	1	no	-	--	-	-	-	-
Unigene0000092	246.6666667	332.6666667	13.0161	12.2862	16.8344	17.3217	14.9557	17.5279	14.04556667	16.60176667	0.241221942	0.573271786	1	no	-	--	-	-	-	-
Unigene0000093	44	18.33333333	1.7606	6.856	1.3488	1.2365	1.567	0.9376	3.3218	1.247033333	-1.413465185	0.049743761	1	no	-	--	-	-	-	-
Unigene0000094	58	60	4.3898	5.3421	2.9574	3.2347	4.4933	3.9688	4.229766667	3.898933333	-0.117498593	0.838504824	1	no	-	--	-	-	-	-
Unigene0000095	41	44.66666667	0.6549	1.4064	0.2795	0.5404	1.1471	0.6236	0.780266667	0.770366667	-0.018421989	0.98620854	1	no	tc1a	transposase [Rana pipiens]	-	-	-	-
Unigene0000096	18.66666667	13.66666667	0	3.1378	0.7262	0.8936	1.1084	0.5517	1.288	0.851233333	-0.597506042	0.568618937	1	no	-	--	-	-	-	-
Unigene0000097	611.6666667	899	11.3376	6.5554	3.1615	5.5586	14.6308	7.6839	7.018166667	9.2911	0.404755202	0.443613384	1	no	Rdh7	PREDICTED: retinol dehydrogenase 7-like [Cyprinus carpio]	-	-	GO:0016616//oxidoreductase activity, acting on the CH-OH group of donors, NAD or NADP as acceptor;GO:0016491//oxidoreductase activity;GO:0016614//oxidoreductase activity, acting on CH-OH group of donors;GO:0003824//catalytic activity	GO:0030154//cell differentiation;GO:0007275//multicellular organism development;GO:0071704//organic substance metabolic process;GO:0048762//mesenchymal cell differentiation;GO:0048729//tissue morphogenesis;GO:0002009//morphogenesis of an epithelium;GO:0003008//system process;GO:0014031//mesenchymal cell development;GO:0007507//heart development;GO:0006720//isoprenoid metabolic process;GO:0048513/…
Unigene0000098	42	68.33333333	0.9595	0.8562	0.7044	0.8837	1.6182	1.1543	0.840033333	1.218733333	0.536864008	0.319003743	1	no	GDPD1	PREDICTED: glycerophosphodiester phosphodiesterase domain-containing protein 1-like isoform X2 [Sinocyclocheilus rhinocerous]	-	-	GO:0016787//hydrolase activity;GO:0003824//catalytic activity;GO:0016788//hydrolase activity, acting on ester bonds;GO:0042578//phosphoric ester hydrolase activity;GO:0008081//phosphoric diester hydrolase activity	GO:0044238//primary metabolic process;GO:0044763//single-organism cellular process;GO:0044710//single-organism metabolic process;GO:0044699//single-organism process;GO:0006066//alcohol metabolic process;GO:0044237//cellular metabolic process;GO:0019751//polyol metabolic process;GO:0009987//cellular process;GO:1901615//organic hydroxy compound metabolic process;GO:0044723//single-organism carbohyd…
Unigene0000099	1739	1926	16.172	13.7952	18.2088	16.7793	12.955	16.9776	16.05866667	15.57063333	-0.044524485	0.907683071	1	no	GPSM2	PREDICTED: G-protein-signaling modulator 2-like isoform X1 [Sinocyclocheilus anshuiensis]	-	-	GO:0030234//enzyme regulator activity;GO:0098772//molecular function regulator;GO:0060589//nucleoside-triphosphatase regulator activity	GO:0040001//establishment of mitotic spindle localization;GO:0044699//single-organism process;GO:0051716//cellular response to stimulus;GO:1902580//single-organism cellular localization;GO:0007049//cell cycle;GO:0007154//cell communication;GO:0050794//regulation of cellular process;GO:0000278//mitotic cell cycle;GO:0071840//cellular component organization or biogenesis;GO:0051293//establishment o…
Unigene0000100	9.333333333	14.33333333	0.4968	0.5209	0.0396	0.4224	0.6401	0.4013	0.352433333	0.487933333	0.469333663	0.565533947	1	no	-	--	-	-	-	-
Unigene0000101	16.66666667	17	1.5466	0.7528	0.9351	1.2054	1.0194	0.6766	1.078166667	0.967133333	-0.156793507	0.857455104	1	no	-	--	-	-	-	-
Unigene0000102	60	59.33333333	0.6278	0.9481	0.7304	0.3813	0.9896	0.6726	0.768766667	0.681166667	-0.174537945	0.758659806	1	no	Cers1	PREDICTED: ceramide synthase 1-like [Sinocyclocheilus anshuiensis]	ko01100//Metabolic pathways//Global and Overview//Metabolism;ko00600//Sphingolipid metabolism//Lipid metabolism//Metabolism	-	-	-
Unigene0000103	1379.666667	1632.666667	10.2417	16.1926	16.0822	16.5882	16.5255	11.2816	14.17216667	14.79843333	0.062384113	0.877948158	1	no	Pnpla2	PREDICTED: patatin-like phospholipase domain-containing protein 2 [Sinocyclocheilus anshuiensis]	ko01100//Metabolic pathways//Global and Overview//Metabolism;ko00561//Glycerolipid metabolism//Lipid metabolism//Metabolism	-	-	-
Unigene0000104	2	3	0	0.4484	0	0.1958	0.2857	0.1343	0.149466667	0.205266667	0.457675589	0.772217655	1	no	-	--	-	-	-	-
Unigene0000105	3.666666667	4.333333333	0.4226	0.0686	0.292	0.2396	0.1966	0.3698	0.261066667	0.268666667	0.041399074	1	1	no	-	--	-	-	-	-
Unigene0000106	78	83	12.5178	8.4665	9.9698	7.394	9.8091	11.8745	10.31803333	9.692533333	-0.090222316	0.866904094	1	no	-	--	-	-	-	-
Unigene0000107	25.33333333	24.33333333	2.849	2.1573	3.0623	2.1531	1.0801	3.5082	2.689533333	2.247133333	-0.25927014	0.706985837	1	no	-	--	-	-	-	-
Unigene0000108	416.3333333	412.3333333	31.6793	14.5593	25.558	22.0814	12.1102	27.6672	23.9322	20.6196	-0.214936679	0.65297769	1	no	-	--	-	-	-	-
Unigene0000109	950.6666667	834.6666667	77.7193	38.8019	68.1615	53.3987	32.4815	55.344	61.5609	47.07473333	-0.387061401	0.379484484	1	no	-	--	-	-	-	-
Unigene0000110	38	47.33333333	0.7849	1.0972	0.3963	1.1978	0.6555	0.6515	0.759466667	0.834933333	0.136674362	0.830454456	1	no	-	--	-	-	-	-
Unigene0000111	39	22.33333333	0.635	1.6228	0.8227	0.3149	0.5909	0.6713	1.026833333	0.5257	-0.965890395	0.120914292	1	no	-	--	-	-	-	-
Unigene0000112	13.66666667	5.666666667	0.9159	1.3375	0.8702	0.1298	0.4261	0.601	1.0412	0.385633333	-1.432945551	0.07113794	1	no	-	--	-	-	-	-
Unigene0000113	13.33333333	4.666666667	1.2005	0.2922	1.5553	0.1276	0.2793	0.5252	1.016	0.3107	-1.709306256	0.056094646	1	no	-	--	-	-	-	-
Unigene0000114	27	26	0.9352	0.7478	1.0385	0.7099	0.808	0.789	0.907166667	0.768966667	-0.238446569	0.694744322	1	no	GABRG1	PREDICTED: gamma-aminobutyric acid receptor subunit gamma-1-like [Sinocyclocheilus grahami]	ko04080//Neuroactive ligand-receptor interaction//Signaling molecules and interaction//Environmental Information Processing	GO:0044425//membrane part;GO:0016020//membrane;GO:0031224//intrinsic component of membrane	GO:0005215//transporter activity;GO:0022838//substrate-specific channel activity;GO:0099600//transmembrane receptor activity;GO:0022891//substrate-specific transmembrane transporter activity;GO:0022857//transmembrane transporter activity;GO:0015276//ligand-gated ion channel activity;GO:0022892//substrate-specific transporter activity;GO:0022836//gated channel activity;GO:0005216//ion channel acti…	GO:0051234//establishment of localization;GO:0006811//ion transport;GO:0023052//signaling;GO:0006810//transport;GO:0009987//cellular process;GO:0007186//G-protein coupled receptor signaling pathway;GO:1902578//single-organism localization;GO:0051716//cellular response to stimulus;GO:0051179//localization;GO:0050794//regulation of cellular process;GO:0044763//single-organism cellular process;GO:00…
Unigene0000115	13	6	1.6407	0.6085	0.8098	0.6643	0.1454	0.4101	1.019666667	0.4066	-1.326415486	0.127552341	1	no	-	--	-	-	-	-
Unigene0000116	12.66666667	14.66666667	0.6915	1.7504	0.1433	0.8819	1.4157	0.4235	0.861733333	0.907033333	0.07391408	0.966342834	1	no	ywhag1	PREDICTED: 14-3-3 protein gamma-like, partial [Anolis carolinensis]	ko04110//Cell cycle//Cell growth and death//Cellular Processes;ko04114//Oocyte meiosis//Cell growth and death//Cellular Processes	-	-	-
Unigene0000117	20	18.33333333	1.2376	0.8675	0.8723	0.7155	1.1056	0.6064	0.992466667	0.809166667	-0.294581758	0.651445968	1	no	-	--	-	-	-	-
Unigene0000118	337	332.6666667	2.4641	2.7045	2.7898	2.4153	1.8913	2.5885	2.6528	2.298366667	-0.206906937	0.622380995	1	no	Prickle1	PREDICTED: prickle-like protein 1 [Sinocyclocheilus anshuiensis]	ko04310//Wnt signaling pathway//Signal transduction//Environmental Information Processing	-	GO:0043169//cation binding;GO:0043167//ion binding;GO:0046872//metal ion binding;GO:0005488//binding;GO:0046914//transition metal ion binding	GO:0007420//brain development;GO:0044699//single-organism process;GO:0032501//multicellular organismal process;GO:0007417//central nervous system development;GO:0060322//head development;GO:0051179//localization;GO:0048870//cell motility;GO:0048856//anatomical structure development;GO:0044763//single-organism cellular process;GO:0007399//nervous system development;GO:0051674//localization of cell…
Unigene0000119	23	23.33333333	1.0187	1.6056	0.7039	0.7424	1.1284	1.1459	1.1094	1.005566667	-0.141770899	0.836397614	1	no	-	--	-	-	-	-
Unigene0000120	51	61.66666667	0.9225	1.1594	0.4694	0.8557	1.2018	0.7044	0.850433333	0.920633333	0.114428534	0.852743025	1	no	Kazn	PREDICTED: kazrin-like [Sinocyclocheilus grahami]	-	-	-	-
Unigene0000121	10	5	1.341	0.2176	0.1158	0.2375	0.364	0.1467	0.558133333	0.2494	-1.162148346	0.253625156	1	no	-	--	-	-	-	-
Unigene0000122	302.3333333	301.3333333	1.9838	1.6682	1.5734	1.3249	1.4714	1.8011	1.7418	1.532466667	-0.184723284	0.665938909	1	no	ARHGEF10L	PREDICTED: rho guanine nucleotide exchange factor 10-like protein [Cyprinus carpio]	-	-	-	-
Unigene0000123	9	1.666666667	0.4758	1.0808	0.5753	0	0.2214	0.1388	0.710633333	0.120066667	-2.565269682	0.016963984	1	no	-	--	-	-	-	-
Unigene0000124	12	13.66666667	1.1005	0.6428	0.9125	0.7485	1.1606	0.7703	0.885266667	0.893133333	0.012763467	1	1	no	-	PREDICTED: transcription elongation factor A protein 3-like isoform X5 [Sinocyclocheilus rhinocerous]	-	GO:0005623//cell;GO:0043227//membrane-bounded organelle;GO:0044464//cell part;GO:0043231//intracellular membrane-bounded organelle;GO:0044424//intracellular part;GO:0043229//intracellular organelle;GO:0005622//intracellular;GO:0043226//organelle	GO:0043167//ion binding;GO:0003676//nucleic acid binding;GO:0043169//cation binding;GO:0003723//RNA binding;GO:0005488//binding;GO:0008135//translation factor activity, RNA binding;GO:0097159//organic cyclic compound binding;GO:1901363//heterocyclic compound binding;GO:0046872//metal ion binding;GO:0046914//transition metal ion binding	GO:0044238//primary metabolic process;GO:0044237//cellular metabolic process;GO:0090304//nucleic acid metabolic process;GO:0006412//translation;GO:0009987//cellular process;GO:0006725//cellular aromatic compound metabolic process;GO:0006366//transcription from RNA polymerase II promoter;GO:0008152//metabolic process;GO:0044267//cellular protein metabolic process;GO:0044260//cellular macromolecule…
Unigene0000125	2957	3912	54.6568	69.6521	47.4668	71.3131	70.183	59.7125	57.25856667	67.06953333	0.228166008	0.541299003	1	no	TSNAX	translin-associated protein X [Danio rerio]	-	-	GO:0003676//nucleic acid binding;GO:0003677//DNA binding;GO:0097159//organic cyclic compound binding;GO:1901363//heterocyclic compound binding;GO:0005488//binding	-
Unigene0000126	1	2.333333333	0	0.191	0	0	0.1217	0.2861	0.063666667	0.135933333	1.094289137	0.570682553	1	no	-	--	-	-	-	-
Unigene0000127	7	13.66666667	0.5742	0.6988	0.2232	0.2441	0.6011	1.7583	0.498733333	0.867833333	0.799149371	0.362061813	1	no	-	--	-	-	-	-
Unigene0000128	1139	1542.666667	14.7961	14.6448	12.7415	15.8613	18.243	16.4516	14.0608	16.85196667	0.261238287	0.494645984	1	no	Pdhx	PREDICTED: pyruvate dehydrogenase protein X component, mitochondrial isoform X1 [Sinocyclocheilus grahami]	ko01100//Metabolic pathways//Global and Overview//Metabolism;ko00010//Glycolysis / Gluconeogenesis//Carbohydrate metabolism//Metabolism;ko00620//Pyruvate metabolism//Carbohydrate metabolism//Metabolism;ko00020//Citrate cycle (TCA cycle)//Carbohydrate metabolism//Metabolism	-	GO:0016740//transferase activity;GO:0003824//catalytic activity	-
Unigene0000129	195.6666667	200.3333333	1.3286	1.5171	1.377	1.0014	1.831	1.0242	1.407566667	1.285533333	-0.130836235	0.782334016	1	no	EML1	PREDICTED: echinoderm microtubule-associated protein-like 1 isoform X5 [Sinocyclocheilus rhinocerous]	-	-	-	-
Unigene0000130	18.66666667	10.66666667	0.2183	0.4959	1.3575	0.3402	0.4062	0.2865	0.690566667	0.3443	-1.004114517	0.202698898	1	no	-	--	-	-	-	-
Unigene0000131	6.666666667	5.333333333	0.3098	0.6785	0.5619	0.5926	0.3603	0.1355	0.516733333	0.3628	-0.510245496	0.631756518	1	no	-	--	-	-	-	-
Unigene0000132	12.66666667	14.33333333	0.6038	0.5486	0.3755	0.1027	0.824	0.6339	0.5093	0.5202	0.030550682	1	1	no	-	--	-	-	-	-
Unigene0000133	354.6666667	376.3333333	5.215	4.8774	5.557	5.5424	4.3893	4.6396	5.216466667	4.8571	-0.10297775	0.804811893	1	no	sdhdb	PREDICTED: succinate dehydrogenase [ubiquinone] cytochrome b small subunit B, mitochondrial-like [Sinocyclocheilus anshuiensis]	ko01100//Metabolic pathways//Global and Overview//Metabolism;ko01110//Biosynthesis of secondary metabolites//Global and Overview//Metabolism;ko01130//Biosynthesis of antibiotics//Global and Overview//Metabolism;ko01120//Microbial metabolism in diverse environments//Global and Overview//Metabolism;ko00190//Oxidative phosphorylation//Energy metabolism//Metabolism;ko01200//Carbon metabolism//Global …	GO:0005622//intracellular;GO:0044429//mitochondrial part;GO:0044455//mitochondrial membrane part;GO:0031975//envelope;GO:0044424//intracellular part;GO:0031966//mitochondrial membrane;GO:0031090//organelle membrane;GO:0043229//intracellular organelle;GO:0044446//intracellular organelle part;GO:0016020//membrane;GO:0005746//mitochondrial respiratory chain;GO:0044422//organelle part;GO:0043226//org…	GO:0048038//quinone binding;GO:0046906//tetrapyrrole binding;GO:0048037//cofactor binding;GO:1901363//heterocyclic compound binding;GO:0005488//binding;GO:0097159//organic cyclic compound binding	GO:0044710//single-organism metabolic process;GO:0044699//single-organism process;GO:0008152//metabolic process;GO:0055114//oxidation-reduction process
Unigene0000134	56.66666667	75.66666667	3.0947	3.7836	5.4455	7.71	4.8889	1.7631	4.107933333	4.787333333	0.220809493	0.723350238	1	no	-	--	-	-	-	-
Unigene0000135	252.6666667	191.6666667	3.8656	6.4584	2.3794	2.2102	4.618	1.8757	4.234466667	2.9013	-0.545480792	0.306517586	1	no	Chi3l1	PREDICTED: acidic mammalian chitinase isoform X1 [Sinocyclocheilus rhinocerous]	-	-	-	-
Unigene0000136	4.666666667	23	0.2344	0.4564	0.4049	0.93	1.3086	2.5292	0.365233333	1.589266667	2.121470873	0.005607861	0.849178348	no	-	--	-	-	-	-
Unigene0000137	45.66666667	28.33333333	1.3688	0.9607	2.0786	0.2436	0.7702	1.3926	1.469366667	0.802133333	-0.87328048	0.19413451	1	no	-	--	-	-	-	-
Unigene0000138	14	18.33333333	0.6232	2.2751	0.323	0.9934	1.0873	1.7039	1.073766667	1.261533333	0.232497802	0.781406559	1	no	-	--	-	-	-	-
Unigene0000139	0	0.666666667	0	0	0	0	0	0.0958	0.001	0.031933333	4.99699125	0.559422673	1	no	-	--	-	-	-	-
Unigene0000140	509.3333333	554.3333333	7.9107	7.7983	9.7635	9.0383	7.2223	8.0386	8.490833333	8.099733333	-0.068031743	0.867671803	1	no	b9d2	PREDICTED: B9 domain-containing protein 2-like [Sinocyclocheilus grahami]	-	GO:0044430//cytoskeletal part;GO:0043232//intracellular non-membrane-bounded organelle;GO:0044463//cell projection part;GO:0044446//intracellular organelle part;GO:0035869//ciliary transition zone;GO:0043228//non-membrane-bounded organelle;GO:0015630//microtubule cytoskeleton;GO:0005856//cytoskeleton;GO:0044464//cell part;GO:0044424//intracellular part;GO:0043229//intracellular organelle;GO:00315…	GO:0008092//cytoskeletal protein binding;GO:0015631//tubulin binding;GO:0005488//binding;GO:0005515//protein binding	GO:0044763//single-organism cellular process;GO:0044767//single-organism developmental process;GO:0071702//organic substance transport;GO:0071840//cellular component organization or biogenesis;GO:0015031//protein transport;GO:0006810//transport;GO:0016043//cellular component organization;GO:0010927//cellular component assembly involved in morphogenesis;GO:0009987//cellular process;GO:0008104//pro…
Unigene0000141	653	491	6.8371	2.734	10.1515	5.1043	1.5421	6.0861	6.5742	4.244166667	-0.631334035	0.27011363	1	no	Sertad4	PREDICTED: SERTA domain-containing protein 4-like [Mesocricetus auratus]	-	-	-	-
Unigene0000142	2.333333333	6.666666667	0.1508	0.1957	0	0.1282	0.5144	0.2638	0.1155	0.302133333	1.387292509	0.210109394	1	no	-	PREDICTED: cysteine-rich motor neuron 1 protein-like [Cyprinus carpio]	-	-	GO:0030234//enzyme regulator activity;GO:0004857//enzyme inhibitor activity;GO:0098772//molecular function regulator	GO:0043086//negative regulation of catalytic activity;GO:0048519//negative regulation of biological process;GO:0044092//negative regulation of molecular function;GO:0065009//regulation of molecular function;GO:0065007//biological regulation;GO:0050789//regulation of biological process;GO:0009892//negative regulation of metabolic process;GO:0019222//regulation of metabolic process;GO:0050790//regu…
Unigene0000143	502	627	4.7145	5.9554	3.9778	5.6647	5.8917	4.6618	4.882566667	5.406066667	0.14693956	0.721113549	1	no	Pomt1	PREDICTED: protein O-mannosyl-transferase 1-like [Cyprinus carpio]	ko01100//Metabolic pathways//Global and Overview//Metabolism;ko00514//Other types of O-glycan biosynthesis//Glycan biosynthesis and metabolism//Metabolism	-	GO:0000030//mannosyltransferase activity;GO:0016757//transferase activity, transferring glycosyl groups;GO:0016740//transferase activity;GO:0016758//transferase activity, transferring hexosyl groups;GO:0003824//catalytic activity	GO:0043170//macromolecule metabolic process;GO:0044763//single-organism cellular process;GO:0043413//macromolecule glycosylation;GO:0044699//single-organism process;GO:0044723//single-organism carbohydrate metabolic process;GO:0044267//cellular protein metabolic process;GO:0008152//metabolic process;GO:0005975//carbohydrate metabolic process;GO:0034645//cellular macromolecule biosynthetic process…
Unigene0000144	27.66666667	50.66666667	0.428	0.4514	0.61	0.6975	0.7302	0.9675	0.496466667	0.7984	0.685414864	0.214582954	1	no	Nrcam	PREDICTED: neuronal cell adhesion molecule-like isoform X2 [Sinocyclocheilus anshuiensis]	ko04514//Cell adhesion molecules (CAMs)//Signaling molecules and interaction//Environmental Information Processing	-	-	-
Unigene0000145	68.66666667	80.33333333	3.2734	3.4283	3.5471	3.2892	3.1383	4.1224	3.416266667	3.516633333	0.041774325	0.936556073	1	no	-	--	-	-	-	-
Unigene0000146	2543.666667	2965	8.8108	7.9476	10.0825	8.6901	9.0877	9.7448	8.946966667	9.1742	0.036183717	0.922145672	1	no	KDM6B	PREDICTED: LOW QUALITY PROTEIN: lysine-specific demethylase 6B-like [Cyprinus carpio]	-	-	-	-
Unigene0000147	11.66666667	9.333333333	0.9837	0.663	1.0196	0.579	1.1266	0.1986	0.888766667	0.634733333	-0.485654101	0.587403733	1	no	-	--	-	-	-	-
Unigene0000148	112.3333333	162.3333333	3.8074	2.6786	2.9093	3.8751	2.7154	5.3007	3.131766667	3.963733333	0.339883178	0.490081181	1	no	-	--	-	-	-	-
Unigene0000149	906	818	8.8861	7.0123	12.0654	7.5639	6.7784	7.748	9.321266667	7.363433333	-0.34014741	0.406805115	1	no	KLF9	PREDICTED: Krueppel-like factor 9 [Sinocyclocheilus rhinocerous]	-	-	GO:0005488//binding;GO:0043167//ion binding;GO:0043169//cation binding	-
Unigene0000150	2733.666667	3316.333333	22.3606	21.0101	20.7278	25.4283	22.2366	20.7918	21.36616667	22.8189	0.094901152	0.796085229	1	no	RPS6KB1	PREDICTED: ribosomal protein S6 kinase beta-1-like [Sinocyclocheilus anshuiensis]	ko04910//Insulin signaling pathway//Endocrine system//Organismal Systems;ko04012//ErbB signaling pathway//Signal transduction//Environmental Information Processing;ko04350//TGF-beta signaling pathway//Signal transduction//Environmental Information Processing;ko04150//mTOR signaling pathway//Signal transduction//Environmental Information Processing	-	GO:0001883//purine nucleoside binding;GO:0016772//transferase activity, transferring phosphorus-containing groups;GO:0097159//organic cyclic compound binding;GO:0036094//small molecule binding;GO:0032549//ribonucleoside binding;GO:0016773//phosphotransferase activity, alcohol group as acceptor;GO:0016740//transferase activity;GO:0003824//catalytic activity;GO:0016301//kinase activity;GO:0032550//…	GO:0006793//phosphorus metabolic process;GO:0044267//cellular protein metabolic process;GO:0008152//metabolic process;GO:0007154//cell communication;GO:0044763//single-organism cellular process;GO:0044238//primary metabolic process;GO:0044260//cellular macromolecule metabolic process;GO:0071704//organic substance metabolic process;GO:0019538//protein metabolic process;GO:0043170//macromolecule me…
Unigene0000151	8813.333333	6236.333333	194.2017	527.1741	128.0267	153.5105	282.105	108.726	283.1341667	181.4471667	-0.641936325	0.2243146	1	no	CNFN	plac8 onzin related protein 1 [Danio rerio]	-	-	-	GO:0032502//developmental process;GO:0007275//multicellular organism development;GO:0044767//single-organism developmental process;GO:0048856//anatomical structure development;GO:0048731//system development;GO:0044707//single-multicellular organism process;GO:0044699//single-organism process;GO:0032501//multicellular organismal process;GO:0009653//anatomical structure morphogenesis
Unigene0000152	462	475.6666667	16.7822	10.6007	22.9442	14.6353	9.8648	20.5314	16.7757	15.0105	-0.160400933	0.730768697	1	no	-	--	-	-	-	-
Unigene0000153	75.66666667	83	5.5641	7.8003	3.3833	10.8491	1.5188	3.57	5.582566667	5.312633333	-0.07150143	0.919641111	1	no	-	--	-	-	-	-
Unigene0000154	11577	14442.66667	77.1955	81.6542	76.5827	94.795	88.6851	75.5193	78.47746667	86.33313333	0.137635879	0.69895788	1	no	Kpnb1	PREDICTED: importin subunit beta-1 isoform X1 [Sinocyclocheilus rhinocerous]	ko03013//RNA transport//Translation//Genetic Information Processing	-	-	-
Unigene0000155	107.6666667	161.6666667	1.0726	1.6852	0.6494	0.9661	2.8954	0.7898	1.135733333	1.550433333	0.449047359	0.45846487	1	no	slc17a8	PREDICTED: vesicular glutamate transporter 3 [Cyprinus carpio]	-	GO:0044456//synapse part;GO:0042995//cell projection;GO:0005623//cell;GO:0005622//intracellular;GO:0031410//cytoplasmic vesicle;GO:0005737//cytoplasm;GO:0043226//organelle;GO:0045202//synapse;GO:0031982//vesicle;GO:0016023//cytoplasmic, membrane-bounded vesicle;GO:0043229//intracellular organelle;GO:0099503//secretory vesicle;GO:0044444//cytoplasmic part;GO:0043231//intracellular membrane-bounded…	GO:0022804//active transmembrane transporter activity;GO:0015291//secondary active transmembrane transporter activity;GO:0005215//transporter activity;GO:0022857//transmembrane transporter activity	GO:0044765//single-organism transport;GO:0023052//signaling;GO:0044699//single-organism process;GO:0044763//single-organism cellular process;GO:0050877//neurological system process;GO:0006810//transport;GO:0003008//system process;GO:0007154//cell communication;GO:0007600//sensory perception;GO:0032501//multicellular organismal process;GO:0009987//cellular process;GO:0050896//response to stimulus;…
Unigene0000156	14	17.66666667	0.8561	0.8334	0.5546	0.9098	0.697	0.8894	0.748033333	0.832066667	0.153596564	0.843488387	1	no	MAP1B	PREDICTED: electromotor neuron-associated protein 1-like, partial [Sinocyclocheilus grahami]	-	-	-	-
Unigene0000157	1227	1377.666667	15.778	30.599	10.9674	13.3214	31.4092	13.5299	19.1148	19.42016667	0.022865477	0.964153964	1	no	Prss16	Zgc:158605 [Danio rerio]	-	-	GO:0003824//catalytic activity;GO:0016787//hydrolase activity;GO:0008233//peptidase activity;GO:0070011//peptidase activity, acting on L-amino acid peptides	GO:0071704//organic substance metabolic process;GO:0008152//metabolic process;GO:0051604//protein maturation;GO:0044238//primary metabolic process;GO:0019538//protein metabolic process;GO:0016485//protein processing;GO:0006508//proteolysis;GO:0043170//macromolecule metabolic process;GO:0010467//gene expression
Unigene0000158	895.3333333	998	5.6681	6.1775	6.4013	5.4755	6.1377	6.3338	6.0823	5.982333333	-0.023908678	0.95199208	1	no	TECPR1	PREDICTED: tectonin beta-propeller repeat-containing protein 1-like isoform X3 [Sinocyclocheilus anshuiensis]	-	-	-	-
Unigene0000159	34.66666667	44	1.7847	1.0077	0.9249	1.1229	1.7604	1.3117	1.2391	1.398333333	0.174415687	0.776032198	1	no	-	--	-	-	-	-
Unigene0000160	42.66666667	52.33333333	0.4706	0.8909	0.2981	0.6224	0.7299	0.4689	0.5532	0.607066667	0.134053802	0.832174339	1	no	HS3ST5	PREDICTED: heparan sulfate glucosamine 3-O-sulfotransferase 5 [Cyprinus carpio]	ko00534//Glycosaminoglycan biosynthesis - heparan sulfate / heparin//Glycan biosynthesis and metabolism//Metabolism	-	-	-
Unigene0000161	2058	2026.333333	11.4846	10.8438	14.7495	11.6017	9.3538	11.0144	12.3593	10.65663333	-0.213845304	0.573715762	1	no	Rps6kb1	PREDICTED: ribosomal protein S6 kinase beta-1-like [Danio rerio]	ko04910//Insulin signaling pathway//Endocrine system//Organismal Systems;ko04012//ErbB signaling pathway//Signal transduction//Environmental Information Processing;ko04350//TGF-beta signaling pathway//Signal transduction//Environmental Information Processing;ko04150//mTOR signaling pathway//Signal transduction//Environmental Information Processing	-	GO:0032549//ribonucleoside binding;GO:0003824//catalytic activity;GO:0097159//organic cyclic compound binding;GO:1901363//heterocyclic compound binding;GO:0097367//carbohydrate derivative binding;GO:0001882//nucleoside binding;GO:0004672//protein kinase activity;GO:0036094//small molecule binding;GO:0032550//purine ribonucleoside binding;GO:0005488//binding;GO:0016773//phosphotransferase activity…	GO:0044260//cellular macromolecule metabolic process;GO:0043170//macromolecule metabolic process;GO:0036211//protein modification process;GO:0044237//cellular metabolic process;GO:0044763//single-organism cellular process;GO:0044699//single-organism process;GO:0019538//protein metabolic process;GO:0043412//macromolecule modification;GO:0006464//cellular protein modification process;GO:0044238//pr…
Unigene0000162	33.66666667	47.33333333	1.3083	1.0672	1.2095	0.8117	1.711	1.9491	1.195	1.4906	0.318882547	0.594880517	1	no	-	--	-	-	-	-
Unigene0000163	5.666666667	35.66666667	0.1466	0.0714	0.2026	0.6024	1.0004	0.7268	0.1402	0.776533333	2.469561505	0.000326354	0.208610888	no	-	apolipoprotein M [Hemibarbus mylodon]	-	-	-	-
Unigene0000164	30.66666667	40.33333333	1.1438	1.2527	0.8891	1.4587	1.2306	1.1258	1.0952	1.2717	0.215564021	0.721788497	1	no	-	--	-	-	-	-
Unigene0000165	4	1.333333333	0.3036	0	0.6293	0.0645	0	0.1992	0.310966667	0.0879	-1.822824872	0.286306486	1	no	-	--	-	-	-	-
Unigene0000166	53	63.66666667	1.7297	0.4593	1.4203	1.1078	1.2333	1.4544	1.2031	1.265166667	0.072570888	0.92097356	1	no	-	gag-like protein [Danio rerio]	-	-	-	-
Unigene0000167	21.33333333	0.666666667	0	2.4667	0	0	0.0737	0	0.822233333	0.024566667	-5.064773836	0.011446664	1	no	Gpr87	PREDICTED: G-protein coupled receptor 87-like [Sinocyclocheilus rhinocerous]	ko04080//Neuroactive ligand-receptor interaction//Signaling molecules and interaction//Environmental Information Processing	-	-	-
Unigene0000168	11.33333333	11.33333333	0.9433	0.7064	0.8273	0.7403	1.3504	0.127	0.825666667	0.739233333	-0.159529651	0.871993655	1	no	-	PREDICTED: metalloreductase STEAP2-like [Sinocyclocheilus rhinocerous]	-	-	-	-
Unigene0000169	11	12.66666667	1.1515	1.0463	0.3183	0.9791	0.5	1.0747	0.8387	0.851266667	0.021456283	1	1	no	-	--	-	-	-	-
Unigene0000170	1463	1163	14.5818	8.3376	30.6507	15.6147	6.8627	14.1452	17.8567	12.20753333	-0.548693771	0.285372867	1	no	BBS10	PREDICTED: Bardet-Biedl syndrome 10 protein-like isoform X1 [Sinocyclocheilus rhinocerous]	-	-	GO:0032549//ribonucleoside binding;GO:0001883//purine nucleoside binding;GO:0001882//nucleoside binding;GO:0032550//purine ribonucleoside binding;GO:1901363//heterocyclic compound binding;GO:0097159//organic cyclic compound binding;GO:0097367//carbohydrate derivative binding;GO:0005488//binding;GO:0036094//small molecule binding	GO:0071704//organic substance metabolic process;GO:0044238//primary metabolic process;GO:0019538//protein metabolic process;GO:0008152//metabolic process;GO:0043170//macromolecule metabolic process
Unigene0000171	35.33333333	40.33333333	1.7564	0.9	2.2996	0.9825	2.1505	1.8603	1.652	1.664433333	0.0108174	1	1	no	-	--	-	-	-	-
Unigene0000172	5	5.666666667	0.4476	0.3632	0.3093	0.1903	0.4165	0.5222	0.373366667	0.376333333	0.011417948	1	1	no	-	--	-	-	-	-
Unigene0000173	159.6666667	125.6666667	2.775	5.9004	1.8638	2.114	4.2763	1.1266	3.513066667	2.505633333	-0.487555644	0.419651489	1	no	-	PREDICTED: E3 ubiquitin-protein ligase DTX3L-like [Sinocyclocheilus rhinocerous]	ko04330//Notch signaling pathway//Signal transduction//Environmental Information Processing	-	-	-
Unigene0000174	1886	1867.666667	19.8892	18.7364	25.6718	21.4523	16.1114	18.1427	21.43246667	18.5688	-0.206917315	0.590001742	1	no	DNAJB1	PREDICTED: dnaJ homolog subfamily B member 1-like [Sinocyclocheilus grahami]	ko04141//Protein processing in endoplasmic reticulum//Folding, sorting and degradation//Genetic Information Processing	-	GO:0005488//binding;GO:0005515//protein binding	GO:0043170//macromolecule metabolic process;GO:0008152//metabolic process;GO:0044260//cellular macromolecule metabolic process;GO:0009987//cellular process;GO:0044238//primary metabolic process;GO:0019538//protein metabolic process;GO:0044237//cellular metabolic process;GO:0071704//organic substance metabolic process;GO:0044267//cellular protein metabolic process
Unigene0000175	2	1.333333333	0.0752	0.2198	0.156	0.1919	0.07	0	0.150333333	0.0873	-0.784111374	0.81647453	1	no	-	--	-	-	-	-
Unigene0000176	139	194	1.3652	1.91	0.9224	1.4961	2.4372	1.3183	1.3992	1.750533333	0.323192339	0.521326981	1	no	GLB1L2	PREDICTED: beta-galactosidase-1-like protein 2 [Sinocyclocheilus rhinocerous]	-	-	GO:0003824//catalytic activity;GO:0004553//hydrolase activity, hydrolyzing O-glycosyl compounds;GO:0016798//hydrolase activity, acting on glycosyl bonds;GO:0016787//hydrolase activity;GO:0015925//galactosidase activity	GO:0044238//primary metabolic process;GO:0008152//metabolic process
Unigene0000177	2769.333333	3341	17.6851	27.0588	14.12	20.5585	23.3213	19.3011	19.6213	21.0603	0.102105358	0.796717115	1	no	snd1	staphylococcal nuclease domain-containing protein 1 isoform p100L [Danio rerio]	-	GO:1990904//ribonucleoprotein complex;GO:0030529//intracellular ribonucleoprotein complex;GO:0005622//intracellular;GO:0044464//cell part;GO:0032991//macromolecular complex;GO:0044424//intracellular part;GO:0005623//cell;GO:0031332//RNAi effector complex	GO:0016787//hydrolase activity;GO:0003824//catalytic activity;GO:0097159//organic cyclic compound binding;GO:0016788//hydrolase activity, acting on ester bonds;GO:0005488//binding	GO:0050789//regulation of biological process;GO:0044699//single-organism process;GO:0010468//regulation of gene expression;GO:0060255//regulation of macromolecule metabolic process;GO:0009987//cellular process;GO:0065007//biological regulation;GO:0019222//regulation of metabolic process;GO:0048519//negative regulation of biological process;GO:0009892//negative regulation of metabolic process;GO:0…
Unigene0000178	15.66666667	21	0.1529	0.8558	0.7922	0.5849	0.6757	0.8694	0.6003	0.71	0.242135357	0.760852467	1	no	-	--	-	-	-	-
Unigene0000179	228	171.6666667	1.8574	1.7402	1.7318	1.4008	1.1064	1.0199	1.776466667	1.1757	-0.59549064	0.180416294	1	no	Parp12	PREDICTED: poly [ADP-ribose] polymerase 12-like [Sinocyclocheilus grahami]	-	-	GO:0005488//binding;GO:0043169//cation binding;GO:0043167//ion binding	-
Unigene0000180	12.33333333	5.333333333	0.3447	0.6152	1.1909	0.1954	0.4277	0.2011	0.716933333	0.274733333	-1.383807008	0.090382329	1	no	-	--	-	-	-	-
Unigene0000181	2571.666667	1870.333333	21.9475	9.3274	27.6937	14.9693	5.3464	16.6329	19.6562	12.3162	-0.674427242	0.185591101	1	no	QflA-14927	PREDICTED: coiled-coil domain-containing protein 191-like [Sinocyclocheilus rhinocerous]	-	-	-	-
Unigene0000182	26.66666667	38.33333333	1.6206	0.4959	1.6317	0.9055	1.6804	2.1471	1.2494	1.577666667	0.336556986	0.606146647	1	no	rpl24	PREDICTED: 60S ribosomal protein L24-like, partial [Panthera pardus]	ko03010//Ribosome//Translation//Genetic Information Processing	-	-	-
Unigene0000183	102.6666667	170.6666667	1.3496	1.2657	1.2064	2.095	1.5555	1.9283	1.2739	1.8596	0.545740299	0.241466675	1	no	FSBP	PREDICTED: fibrinogen silencer-binding protein-like [Sinocyclocheilus rhinocerous]	ko03440//Homologous recombination//Replication and repair//Genetic Information Processing	-	-	-
Unigene0000184	233.6666667	43	0.7313	19.9652	1.0875	0.7028	2.6628	0.3616	7.261333333	1.2424	-2.547104747	0.015772013	1	no	-	PREDICTED: uncharacterized protein LOC109112478 [Cyprinus carpio]	-	-	-	-
Unigene0000185	22.66666667	21	0.9276	0.3565	0.3795	0.3943	0.636	0.3417	0.554533333	0.457333333	-0.278028109	0.707976825	1	no	KCNN3	PREDICTED: small conductance calcium-activated potassium channel protein 3 isoform X1 [Danio rerio]	-	-	-	-
Unigene0000186	4836.666667	2592.333333	29.6462	184.6852	18.9798	39.4103	54.4878	19.6615	77.7704	37.8532	-1.038805892	0.131719504	1	no	anxa2-a	PREDICTED: annexin A2-like [Sinocyclocheilus grahami]	-	-	GO:0043168//anion binding;GO:0098772//molecular function regulator;GO:0008289//lipid binding;GO:0043167//ion binding;GO:0030234//enzyme regulator activity;GO:0004857//enzyme inhibitor activity;GO:0005543//phospholipid binding;GO:0055102//lipase inhibitor activity;GO:0005515//protein binding;GO:0005488//binding	-
Unigene0000187	9.333333333	12.33333333	1.4673	0.4286	0.1521	1.1228	0.4779	0.7703	0.682666667	0.790333333	0.211279947	0.870865745	1	no	-	--	-	-	-	-
Unigene0000188	19	27.33333333	0.6265	0.6438	0.7214	0.5918	0.7449	1.1876	0.6639	0.841433333	0.34188302	0.593339999	1	no	-	PREDICTED: sorbin and SH3 domain-containing protein 2-like [Sinocyclocheilus rhinocerous]	-	-	-	-
Unigene0000189	5	3.666666667	0.5737	0	0.1487	0.1219	0.1779	0.1673	0.2408	0.1557	-0.629066448	0.615438768	1	no	-	--	-	-	-	-
Unigene0000190	936.3333333	930	12.5787	15.6387	18.6276	13.6153	12.2917	14.9402	15.615	13.61573333	-0.197657882	0.621607253	1	no	rbm18	PREDICTED: probable RNA-binding protein 18 [Sinocyclocheilus rhinocerous]	-	-	GO:0005488//binding;GO:1901363//heterocyclic compound binding;GO:0003676//nucleic acid binding;GO:0036094//small molecule binding;GO:0097159//organic cyclic compound binding	-
Unigene0000191	16	17	0.9758	0.7464	1.6615	1.1259	0.1297	1.8294	1.1279	1.028333333	-0.133331175	0.883390299	1	no	-	--	-	-	-	-
Unigene0000192	12	14	0.6269	1.068	1.137	0.7328	1.3854	0.8227	0.943966667	0.9803	0.054487407	0.955599762	1	no	-	--	-	-	-	-
Unigene0000193	46.66666667	38	1.0562	0.9689	0.821	0.5526	0.6426	0.853	0.9487	0.682733333	-0.474629756	0.379929783	1	no	-	UDP glucuronosyltransferase 2 family polypeptide a1 isoform 3 [Danio rerio]	-	-	GO:0016757//transferase activity, transferring glycosyl groups;GO:0016740//transferase activity;GO:0003824//catalytic activity	-
Unigene0000194	322	328.6666667	3.3093	3.9653	2.9683	3.5171	3.5828	2.1623	3.4143	3.0874	-0.145197418	0.741121405	1	no	-	--	-	-	-	-
Unigene0000195	21	16.33333333	1.2472	3.0713	0.2281	1.3099	1.5702	0.3209	1.515533333	1.067	-0.506265408	0.560850528	1	no	-	--	-	-	-	-
Unigene0000196	268.3333333	356.6666667	3.7274	2.9584	2.1073	3.4107	4.1296	2.8404	2.931033333	3.460233333	0.239459951	0.590081793	1	no	Shpk	PREDICTED: sedoheptulokinase [Sinocyclocheilus rhinocerous]	-	-	GO:0003824//catalytic activity;GO:0016740//transferase activity;GO:0016772//transferase activity, transferring phosphorus-containing groups	-
Unigene0000197	198.6666667	357	6.5258	2.0528	2.2797	3.8174	8.7451	4.8826	3.619433333	5.815033333	0.684023618	0.214215453	1	no	DDO	PREDICTED: D-aspartate oxidase-like [Sinocyclocheilus rhinocerous]	ko04146//Peroxisome//Transport and catabolism//Cellular Processes;ko00250//Alanine, aspartate and glutamate metabolism//Amino acid metabolism//Metabolism	-	GO:0003824//catalytic activity;GO:0016638//oxidoreductase activity, acting on the CH-NH2 group of donors;GO:0016491//oxidoreductase activity;GO:0016641//oxidoreductase activity, acting on the CH-NH2 group of donors, oxygen as acceptor;GO:0003884//D-amino-acid oxidase activity	GO:0008152//metabolic process;GO:0044699//single-organism process;GO:0044710//single-organism metabolic process
Unigene0000198	466.6666667	310.3333333	1.9752	4.6921	1.1465	1.689	1.7803	1.185	2.6046	1.551433333	-0.747460124	0.15528473	1	no	THRAP3	PREDICTED: thyroid hormone receptor-associated protein 3-like isoform X2 [Sinocyclocheilus anshuiensis]	-	-	-	-
Unigene0000199	46.66666667	52	0.4551	0.9576	0.6391	0.5742	0.9563	0.5138	0.683933333	0.681433333	-0.005283184	1	1	no	XKR7	XK-related protein 7 [Danio rerio]	-	GO:0044425//membrane part;GO:0031224//intrinsic component of membrane;GO:0016020//membrane	-	-
Unigene0000200	64.66666667	81.66666667	0.8365	1.1198	0.9445	0.5842	1.6958	1.0064	0.966933333	1.095466667	0.180057257	0.753485974	1	no	LYPD6B	PREDICTED: ly6/PLAUR domain-containing protein 6B-like isoform X1 [Sinocyclocheilus anshuiensis]	-	-	-	-
Unigene0000201	3.333333333	5.333333333	0.0656	0.5106	0.0679	0.2787	0.183	0.4589	0.2147	0.306866667	0.515289751	0.650697651	1	no	Ttc22	PREDICTED: LOW QUALITY PROTEIN: tetratricopeptide repeat protein 22-like [Cyprinus carpio]	-	-	-	-
Unigene0000202	12.66666667	13	0.5164	1.1492	1.147	0.6272	0.8924	1.0328	0.937533333	0.8508	-0.140049952	0.910977529	1	no	-	--	-	-	-	-
Unigene0000203	8.333333333	16.66666667	0.2441	1.01	0.253	1.0377	0.9086	0.7475	0.502366667	0.897933333	0.837867596	0.275464799	1	no	-	--	-	-	-	-
Unigene0000204	19.66666667	21	0.6754	1.6908	0.45	1.1075	0.7183	0.8442	0.938733333	0.89	-0.076910053	0.94288526	1	no	-	--	-	-	-	-
Unigene0000205	2.666666667	3.666666667	0.2221	0.2162	0	0.0944	0.155	0.2915	0.1461	0.1803	0.303443219	0.883752096	1	no	-	PREDICTED: histone-lysine N-methyltransferase 2C-like isoform X19 [Salmo salar]	-	-	-	-
Unigene0000206	1053.333333	1066.333333	10.3306	19.9158	5.2714	9.652	15.1696	7.5785	11.83926667	10.80003333	-0.132543957	0.793805116	1	no	optn	PREDICTED: optineurin [Sinocyclocheilus rhinocerous]	-	GO:0005623//cell;GO:0044464//cell part;GO:0005622//intracellular;GO:0044424//intracellular part	-	-
Unigene0000207	29.33333333	44.66666667	1.2262	1.6712	1.4234	1.2093	3.3317	1.3732	1.440266667	1.9714	0.452884578	0.468442127	1	no	sand	PREDICTED: vacuolar fusion protein MON1 homolog B-like [Sinocyclocheilus anshuiensis]	-	-	-	-
Unigene0000208	7.333333333	9	0.3722	0.1208	0.9	0.4219	0.2886	0.7598	0.464333333	0.4901	0.077915295	1	1	no	PCLO	PREDICTED: protein piccolo isoform X3 [Danio rerio]	-	-	-	-
Unigene0000209	7.333333333	7.333333333	0.5915	0.2559	0.6131	0.5588	0.5504	0.1725	0.486833333	0.427233333	-0.18840374	0.871618606	1	no	-	--	-	-	-	-
Unigene0000210	1451.333333	766.3333333	11.4966	79.4116	10.7343	13.0262	23.6285	12.1578	33.88083333	16.27083333	-1.058181217	0.114514849	1	no	IRF1	interferon regulatory factor 1 [Carassius auratus]	-	-	GO:0097159//organic cyclic compound binding;GO:1901363//heterocyclic compound binding;GO:0005488//binding;GO:0003676//nucleic acid binding	-
Unigene0000211	14	14.66666667	1.165	0.3781	1.771	0.4623	0.7227	1.8348	1.1047	1.0066	-0.134164132	0.896287721	1	no	-	--	-	-	-	-
Unigene0000212	10.66666667	5.333333333	0.8444	0.3737	1.2731	0.3916	0	0.6717	0.8304	0.354433333	-1.228292153	0.234676264	1	no	-	--	-	-	-	-
Unigene0000213	12	11.66666667	1.3051	0.9716	0.4774	0.3916	1.0001	1.0075	0.918033333	0.799733333	-0.199027517	0.820158234	1	no	-	--	-	-	-	-
Unigene0000214	9	6	0.2053	1.066	0.5675	0.4655	0.0637	0.5389	0.612933333	0.356033333	-0.783717847	0.436499529	1	no	-	--	-	-	-	-
Unigene0000215	6.666666667	12	0.7744	0.377	0.4013	0.6584	0.9368	0.8808	0.517566667	0.825333333	0.673232204	0.369010224	1	no	-	PREDICTED: low-density lipoprotein receptor class A domain-containing protein 4-like [Sinocyclocheilus grahami]	-	-	-	-
Unigene0000216	66	31	1.6141	1.5714	1.3195	0.5799	0.5923	0.6962	1.501666667	0.6228	-1.269723756	0.01594596	1	no	ERBB4	PREDICTED: receptor tyrosine-protein kinase erbB-4-like [Sinocyclocheilus grahami]	ko04020//Calcium signaling pathway//Signal transduction//Environmental Information Processing;ko04144//Endocytosis//Transport and catabolism//Cellular Processes;ko04012//ErbB signaling pathway//Signal transduction//Environmental Information Processing	-	GO:0016740//transferase activity;GO:0003824//catalytic activity;GO:0016772//transferase activity, transferring phosphorus-containing groups;GO:0004672//protein kinase activity;GO:0016773//phosphotransferase activity, alcohol group as acceptor;GO:1901363//heterocyclic compound binding;GO:0005488//binding;GO:0036094//small molecule binding;GO:0097159//organic cyclic compound binding;GO:0004713//pro…	GO:0006796//phosphate-containing compound metabolic process;GO:0006793//phosphorus metabolic process;GO:0044237//cellular metabolic process;GO:0008152//metabolic process;GO:0009987//cellular process
Unigene0000217	40.33333333	113.6666667	0.4944	0.6761	0.244	0.5404	2.4098	0.69	0.4715	1.2134	1.36372554	0.04226595	1	no	-	PREDICTED: nesprin-1-like [Sinocyclocheilus rhinocerous]	-	-	-	-
Unigene0000218	3.333333333	9.666666667	0.1953	0.1141	0.081	0.0996	0.6543	0.2734	0.130133333	0.342433333	1.395832592	0.171615538	1	no	EPS15	PREDICTED: extracellular matrix-binding protein ebh-like, partial [Sinocyclocheilus anshuiensis]	-	-	-	-
Unigene0000219	96.66666667	195.6666667	2.1967	3.135	1.8887	2.1648	7.2705	3.7565	2.4068	4.397266667	0.869490764	0.111382259	1	no	-	PREDICTED: extracellular matrix-binding protein ebh-like, partial [Sinocyclocheilus anshuiensis]	-	-	-	-
Unigene0000220	544.6666667	809.3333333	3.0492	3.1936	2.7611	2.8499	6.4225	2.7208	3.0013	3.997733333	0.413594708	0.364938594	1	no	SORCS3	PREDICTED: VPS10 domain-containing receptor SorCS3-like [Sinocyclocheilus grahami]	-	-	-	-
Unigene0000221	54	40.66666667	0.6899	0.8769	1.5692	0.7658	0.5528	0.7378	1.045333333	0.685466667	-0.608804642	0.280687763	1	no	-	--	-	-	-	-
Unigene0000222	2504.666667	2974.666667	10.8406	10.515	8.6431	10.143	11.7137	9.7012	9.999566667	10.5193	0.073101223	0.843954858	1	no	CCNT2	PREDICTED: cyclin-T2-like isoform X1 [Sinocyclocheilus rhinocerous]	-	-	-	GO:0010467//gene expression;GO:0051726//regulation of cell cycle;GO:0009058//biosynthetic process;GO:0090304//nucleic acid metabolic process;GO:0034645//cellular macromolecule biosynthetic process;GO:0044271//cellular nitrogen compound biosynthetic process;GO:0050789//regulation of biological process;GO:0019438//aromatic compound biosynthetic process;GO:0044260//cellular macromolecule metabolic p…
Unigene0000223	53.66666667	73.66666667	0.9991	0.8135	1.1297	1.1892	1.3861	0.9854	0.980766667	1.1869	0.275216537	0.59781674	1	no	-	--	-	-	-	-
Unigene0000224	10.66666667	2	0	2.4197	0	0.3302	0.0723	0	0.806566667	0.134166667	-2.587767502	0.124269997	1	no	-	--	-	-	-	-
Unigene0000225	8.666666667	1.333333333	1.3204	0.2268	0.483	0.1321	0.0723	0.068	0.676733333	0.0908	-2.897823249	0.01411487	1	no	-	--	-	-	-	-
Unigene0000226	13.33333333	18.33333333	0.812	1.3987	0.259	0.3718	1.9181	0.8198	0.823233333	1.036566667	0.332439602	0.69938183	1	no	BTBD11	PREDICTED: ankyrin repeat and BTB/POZ domain-containing protein 2-like [Sinocyclocheilus rhinocerous]	-	-	-	-
Unigene0000227	8	6.666666667	0.8494	0.3007	0.7203	0.3283	0.2874	0.7431	0.623466667	0.452933333	-0.461013712	0.627005946	1	no	-	PREDICTED: receptor tyrosine-protein kinase erbB-4-like, partial [Notothenia coriiceps]	ko03013//RNA transport//Translation//Genetic Information Processing	-	-	-
Unigene0000228	1736	1585.666667	12.322	8.4182	14.5334	9.5454	6.3895	12.1329	11.75786667	9.355933333	-0.329672836	0.430878674	1	no	TINF2	PREDICTED: TERF1-interacting nuclear factor 2-like [Cyprinus carpio]	-	-	-	-
Unigene0000229	48.66666667	57	3.6116	1.91	0.9705	1.7438	1.4107	3.55	2.164033333	2.234833333	0.046444522	0.953164413	1	no	-	--	-	-	-	-
Unigene0000230	1.333333333	0.666666667	0.1035	0.2014	0.1072	0.1759	0	0	0.137366667	0.058633333	-1.228238981	0.748035536	1	no	-	--	-	-	-	-
Unigene0000231	20.66666667	16	0.9224	1.5394	1.6389	0.7842	1.0422	0.9799	1.3669	0.935433333	-0.547200958	0.388761091	1	no	-	--	-	-	-	-
Unigene0000232	12	8.666666667	0.4414	1.2355	0.2859	0.3753	0.3594	0.531	0.654266667	0.4219	-0.632977683	0.422362381	1	no	-	--	-	-	-	-
Unigene0000233	3000	3346	20.1957	19.3138	21.3866	22.2832	18.4918	18.8848	20.2987	19.8866	-0.029590695	0.93583627	1	no	FBXW5	PREDICTED: F-box/WD repeat-containing protein 5-like [Sinocyclocheilus grahami]	-	GO:0000151//ubiquitin ligase complex;GO:1902494//catalytic complex;GO:1990234//transferase complex;GO:0043234//protein complex;GO:0005623//cell;GO:0005622//intracellular;GO:0031461//cullin-RING ubiquitin ligase complex;GO:0044424//intracellular part;GO:0032991//macromolecular complex;GO:0044464//cell part	-	GO:0009057//macromolecule catabolic process;GO:0006511//ubiquitin-dependent protein catabolic process;GO:0016043//cellular component organization;GO:0044257//cellular protein catabolic process;GO:0043170//macromolecule metabolic process;GO:0044267//cellular protein metabolic process;GO:0044260//cellular macromolecule metabolic process;GO:0006508//proteolysis;GO:0007098//centrosome cycle;GO:002240…
Unigene0000234	627.6666667	580.3333333	1.9382	3.0861	1.6336	1.5091	1.9324	2.0374	2.2193	1.8263	-0.28118093	0.513179727	1	no	nav3	PREDICTED: LOW QUALITY PROTEIN: neuron navigator 3 [Sinocyclocheilus grahami]	-	-	-	-
Unigene0000235	4.333333333	3.666666667	0.1615	0.0786	0.8369	0.5492	0.0751	0.1413	0.359	0.2552	-0.492355515	0.752310372	1	no	-	PREDICTED: vegetative cell wall protein gp1-like [Sinocyclocheilus rhinocerous]	-	-	-	-
Unigene0000236	6.666666667	10.33333333	1.0005	0.0573	0.122	0.5004	0.3834	0.7209	0.393266667	0.5349	0.443761295	0.668048165	1	no	-	--	-	-	-	-
Unigene0000237	16.33333333	24.33333333	0.8092	0.3636	0.3548	0.3969	1.3032	0.354	0.5092	0.6847	0.427239593	0.568998517	1	no	-	--	-	-	-	-
Unigene0000238	87	119.6666667	2.3078	2.3538	1.0479	1.0278	4.5609	1.5577	1.903166667	2.382133333	0.323852258	0.608481969	1	no	-	--	-	-	-	-
Unigene0000239	17	28	0.7711	0.5222	0.417	0.6841	0.9671	0.8506	0.5701	0.833933333	0.548717054	0.373854303	1	no	Hfe2	PREDICTED: hemojuvelin-like [Sinocyclocheilus rhinocerous]	-	-	-	GO:0044707//single-multicellular organism process;GO:0032502//developmental process;GO:0048856//anatomical structure development;GO:0007275//multicellular organism development;GO:0009790//embryo development;GO:0048568//embryonic organ development;GO:0044699//single-organism process;GO:0048731//system development;GO:0032501//multicellular organismal process;GO:0048513//animal organ development;GO:…
Unigene0000240	252	281	3.6817	1.9591	1.1691	1.6035	2.8634	2.3133	2.269966667	2.260066667	-0.006305783	0.994339195	1	no	PAPSS2	PREDICTED: bifunctional 3'-phosphoadenosine 5'-phosphosulfate synthase 2-like [Sinocyclocheilus grahami]	ko01100//Metabolic pathways//Global and Overview//Metabolism;ko01130//Biosynthesis of antibiotics//Global and Overview//Metabolism;ko00230//Purine metabolism//Nucleotide metabolism//Metabolism;ko01120//Microbial metabolism in diverse environments//Global and Overview//Metabolism;ko00450//Selenocompound metabolism//Metabolism of other amino acids//Metabolism;ko00920//Sulfur metabolism//Energy meta…	-	GO:0001883//purine nucleoside binding;GO:0016740//transferase activity;GO:0032550//purine ribonucleoside binding;GO:0032549//ribonucleoside binding;GO:0016301//kinase activity;GO:0004779//sulfate adenylyltransferase activity;GO:0016779//nucleotidyltransferase activity;GO:0097367//carbohydrate derivative binding;GO:0097159//organic cyclic compound binding;GO:0036094//small molecule binding;GO:0005…	GO:0008152//metabolic process;GO:0044237//cellular metabolic process;GO:0009987//cellular process;GO:0006790//sulfur compound metabolic process
Unigene0000241	43.33333333	40.33333333	0.8555	0.6996	0.6739	0.5382	0.4935	0.7934	0.743	0.608366667	-0.288421103	0.604882752	1	no	CHRNA9	PREDICTED: neuronal acetylcholine receptor subunit alpha-9-II-like [Sinocyclocheilus anshuiensis]	ko04080//Neuroactive ligand-receptor interaction//Signaling molecules and interaction//Environmental Information Processing	GO:0097060//synaptic membrane;GO:0016020//membrane;GO:0005886//plasma membrane;GO:0045202//synapse;GO:0031224//intrinsic component of membrane;GO:0098805//whole membrane;GO:0098590//plasma membrane region;GO:0044456//synapse part;GO:0044464//cell part;GO:0071944//cell periphery;GO:0044459//plasma membrane part;GO:0005623//cell;GO:0098589//membrane region;GO:0044425//membrane part	GO:0005216//ion channel activity;GO:0022836//gated channel activity;GO:0022857//transmembrane transporter activity;GO:0022892//substrate-specific transporter activity;GO:0015276//ligand-gated ion channel activity;GO:0060089//molecular transducer activity;GO:0004872//receptor activity;GO:0022838//substrate-specific channel activity;GO:0022834//ligand-gated channel activity;GO:0099600//transmembran…	GO:0044763//single-organism cellular process;GO:0048562//embryonic organ morphogenesis;GO:0030003//cellular cation homeostasis;GO:0072503//cellular divalent inorganic cation homeostasis;GO:0007275//multicellular organism development;GO:0009790//embryo development;GO:0044699//single-organism process;GO:0055080//cation homeostasis;GO:0048513//animal organ development;GO:0098771//inorganic ion homeo…
Unigene0000242	115	122	1.8811	1.613	0.7876	1.0062	2.1909	0.8938	1.427233333	1.363633333	-0.065765444	0.912300496	1	no	Jakmip3	PREDICTED: janus kinase and microtubule-interacting protein 3 isoform X2 [Sinocyclocheilus grahami]	-	-	-	-
Unigene0000243	30.66666667	54	0.4184	1.0794	0.412	0.836	1.2459	0.9335	0.6366	1.005133333	0.658927829	0.273785124	1	no	Gucy2e	PREDICTED: retinal guanylyl cyclase 2-like [Sinocyclocheilus grahami]	-	GO:0031224//intrinsic component of membrane;GO:0016020//membrane;GO:0044425//membrane part	GO:1901363//heterocyclic compound binding;GO:0016740//transferase activity;GO:0009975//cyclase activity;GO:0005488//binding;GO:0036094//small molecule binding;GO:0016829//lyase activity;GO:0097159//organic cyclic compound binding;GO:0003824//catalytic activity;GO:0016301//kinase activity;GO:0032550//purine ribonucleoside binding;GO:0032549//ribonucleoside binding;GO:0001883//purine nucleoside bin…	GO:0044763//single-organism cellular process;GO:1901360//organic cyclic compound metabolic process;GO:0034641//cellular nitrogen compound metabolic process;GO:0006793//phosphorus metabolic process;GO:0051716//cellular response to stimulus;GO:0009987//cellular process;GO:0009058//biosynthetic process;GO:0007154//cell communication;GO:0044711//single-organism biosynthetic process;GO:0046483//hetero…
Unigene0000244	9	9.666666667	0.8472	0.0868	0.2773	0.2275	0.5394	0.3901	0.403766667	0.385666667	-0.066167354	0.951867047	1	no	-	PREDICTED: fibroleukin-like [Cyprinus carpio]	-	-	-	-
Unigene0000245	12.33333333	13.33333333	1.0141	0.8711	0.3091	1.065	0.333	0.6785	0.731433333	0.692166667	-0.07960691	0.95866521	1	no	-	--	-	-	-	-
Unigene0000246	33.66666667	37.66666667	2.7725	3.1254	1.4368	2.7915	2.9873	1.5321	2.4449	2.436966667	-0.00468894	1	1	no	-	--	-	-	-	-
Unigene0000247	11	9	0.3493	0.6234	0.9653	0.5939	0.4333	0.3565	0.646	0.461233333	-0.486037385	0.542532269	1	no	-	--	-	-	-	-
Unigene0000248	984.3333333	892.6666667	13.6407	13.139	16.1945	10.9205	11.5748	11.808	14.32473333	11.43443333	-0.325123412	0.406194035	1	no	RGP1	PREDICTED: RAB6A-GEF complex partner protein 2-like isoform X1 [Cyprinus carpio]	-	-	-	-
Unigene0000249	15.66666667	10.66666667	0.7158	0.6969	2.0032	0.6086	0.3997	1.0021	1.138633333	0.670133333	-0.764783165	0.317881284	1	no	Gripap1	PREDICTED: GRIP1-associated protein 1 [Astyanax mexicanus]	-	-	-	-
Unigene0000250	202.6666667	375.6666667	3.5313	8.0138	3.4797	11.1428	11.0614	2.6545	5.008266667	8.286233333	0.726405065	0.211640662	1	no	Cldn4	PREDICTED: claudin-4-like [Sinocyclocheilus anshuiensis]	ko04530//Tight junction//Cellular commiunity//Cellular Processes;ko04514//Cell adhesion molecules (CAMs)//Signaling molecules and interaction//Environmental Information Processing	GO:0031224//intrinsic component of membrane;GO:0005911//cell-cell junction;GO:0016020//membrane;GO:0030054//cell junction;GO:0043296//apical junction complex;GO:0044425//membrane part	-	GO:0044767//single-organism developmental process;GO:0044707//single-multicellular organism process;GO:0048731//system development;GO:0007275//multicellular organism development;GO:0044699//single-organism process;GO:0032502//developmental process;GO:0048856//anatomical structure development;GO:0048513//animal organ development;GO:0032501//multicellular organismal process;GO:0007423//sensory orga…
Unigene0000251	6.666666667	6.666666667	0.7267	0.3931	0.5022	0.6179	0.3757	0.4239	0.540666667	0.4725	-0.194425084	0.924030531	1	no	-	--	-	-	-	-
Unigene0000252	7.333333333	14	0.5582	0.1812	0.6429	0.6856	1.3275	0.3256	0.460766667	0.779566667	0.758636053	0.380038151	1	no	-	PREDICTED: uncharacterized protein LOC101477648 [Maylandia zebra]	-	-	-	-
Unigene0000253	9	12	0.5193	0.3371	0.7177	0.5887	0.6443	0.6058	0.5247	0.612933333	0.224237375	0.786074871	1	no	-	--	-	-	-	-
Unigene0000254	1538	1772.333333	32.0092	43.4151	27.1279	40.207	36.7088	27.7329	34.18406667	34.8829	0.029195948	0.942057904	1	no	cript	PREDICTED: cysteine-rich PDZ-binding protein [Sinocyclocheilus grahami]	-	GO:0005622//intracellular;GO:0044464//cell part;GO:0044424//intracellular part;GO:0005623//cell	-	-
Unigene0000255	41.33333333	55.33333333	1.9715	1.6296	1.0024	1.3283	3.0807	1.1391	1.5345	1.849366667	0.269262645	0.659209839	1	no	-	--	-	-	-	-
Unigene0000256	18.66666667	10.66666667	0.7733	0.941	1.0019	0.5753	0.4497	0.3383	0.9054	0.454433333	-0.994486644	0.128424565	1	no	-	--	-	-	-	-
Unigene0000257	7.666666667	5.666666667	0.4593	1.1178	0.1587	0.3905	0.4274	0.3349	0.5786	0.384266667	-0.590458488	0.553784897	1	no	-	--	-	-	-	-
Unigene0000258	41.66666667	29	2.5401	0.8573	0.8425	1.0366	1.2291	0.3556	1.4133	0.873766667	-0.693747763	0.308893607	1	no	Adm2	PREDICTED: ADM2-like [Sinocyclocheilus rhinocerous]	-	-	-	-
Unigene0000259	21.66666667	9	1.468	0.2382	2.3457	0.7281	0	0.6957	1.350633333	0.4746	-1.508852063	0.137676014	1	no	-	--	-	-	-	-
Unigene0000260	1890	1773.666667	16.7111	17.9975	20.2208	15.1434	14.1138	16.0646	18.3098	15.10726667	-0.277373373	0.458817237	1	no	slc30a5	PREDICTED: zinc transporter 5-like [Sinocyclocheilus rhinocerous]	-	GO:0044425//membrane part;GO:0031224//intrinsic component of membrane;GO:0043226//organelle;GO:0043229//intracellular organelle;GO:0005623//cell;GO:0044424//intracellular part;GO:0044464//cell part;GO:0043227//membrane-bounded organelle;GO:0016020//membrane;GO:0005622//intracellular;GO:0043231//intracellular membrane-bounded organelle	GO:0022890//inorganic cation transmembrane transporter activity;GO:0046915//transition metal ion transmembrane transporter activity;GO:0015075//ion transmembrane transporter activity;GO:0022857//transmembrane transporter activity;GO:0022892//substrate-specific transporter activity;GO:0046873//metal ion transmembrane transporter activity;GO:0022891//substrate-specific transmembrane transporter act…	GO:0006811//ion transport;GO:0044699//single-organism process;GO:0006829//zinc II ion transport;GO:0070838//divalent metal ion transport;GO:0006810//transport;GO:0030001//metal ion transport;GO:0051179//localization;GO:0006812//cation transport;GO:0044763//single-organism cellular process;GO:0009987//cellular process;GO:0072511//divalent inorganic cation transport;GO:1902578//single-organism loca…
Unigene0000261	2	3.666666667	0	0.1421	0.3025	0.1241	0.2716	0.3192	0.1482	0.2383	0.685233504	0.623409692	1	no	fxyd2	PREDICTED: sodium/potassium-transporting ATPase subunit gamma-like [Sinocyclocheilus anshuiensis]	-	-	-	-
Unigene0000262	144.6666667	134.3333333	1.4203	1.1659	1.4625	1.2392	0.9329	1.1209	1.349566667	1.097666667	-0.298056234	0.523741597	1	no	Unc13b	PREDICTED: protein unc-13 homolog B-like isoform X2 [Cyprinus carpio]	-	-	-	-
Unigene0000263	82.33333333	103	3.9699	5.4661	4.585	4.9183	5.9106	4.7139	4.673666667	5.180933333	0.148657177	0.76969	1	no	-	--	-	-	-	-
Unigene0000264	47.66666667	51.66666667	0.8544	1.2781	0.8423	0.8504	1.2992	0.7293	0.9916	0.959633333	-0.047275	0.942689494	1	no	CYP21A2	PREDICTED: steroid 21-hydroxylase-like [Sinocyclocheilus anshuiensis]	ko01100//Metabolic pathways//Global and Overview//Metabolism;ko00140//Steroid hormone biosynthesis//Lipid metabolism//Metabolism	-	GO:0046914//transition metal ion binding;GO:1901363//heterocyclic compound binding;GO:0043169//cation binding;GO:0097159//organic cyclic compound binding;GO:0003824//catalytic activity;GO:0016491//oxidoreductase activity;GO:0046906//tetrapyrrole binding;GO:0046872//metal ion binding;GO:0043167//ion binding;GO:0005488//binding	GO:0044710//single-organism metabolic process;GO:0044699//single-organism process;GO:0008152//metabolic process
Unigene0000265	57.33333333	48.33333333	1.708	0.9111	1.4308	0.6167	1.241	1.1668	1.349966667	1.008166667	-0.421189625	0.448816926	1	no	adprhl1	PREDICTED: protein ADP-ribosylarginine hydrolase-like protein 1 [Sinocyclocheilus anshuiensis]	-	-	GO:0005488//binding;GO:0043169//cation binding;GO:0043167//ion binding;GO:0046872//metal ion binding;GO:0016799//hydrolase activity, hydrolyzing N-glycosyl compounds;GO:0003824//catalytic activity;GO:0016798//hydrolase activity, acting on glycosyl bonds;GO:0016787//hydrolase activity	GO:0006464//cellular protein modification process;GO:0044260//cellular macromolecule metabolic process;GO:0044237//cellular metabolic process;GO:0009987//cellular process;GO:0043412//macromolecule modification;GO:0019538//protein metabolic process;GO:0071704//organic substance metabolic process;GO:0044238//primary metabolic process;GO:0036211//protein modification process;GO:0008152//metabolic pr…
Unigene0000266	10.33333333	9.666666667	0.9573	0.3883	1.1576	0.407	0.6681	0.9772	0.8344	0.6841	-0.286531928	0.74354184	1	no	-	--	-	-	-	-
Unigene0000267	82.66666667	69.66666667	2.9046	4.4648	2.0598	2.3071	2.7028	2.0732	3.143066667	2.361033333	-0.412754463	0.434380075	1	no	-	--	-	-	-	-
Unigene0000268	5.666666667	9.333333333	0.0697	0.475	0.6502	0.8889	0.2594	0.5488	0.3983	0.5657	0.506181691	0.597538527	1	no	-	--	-	-	-	-
Unigene0000269	30.66666667	25	2.1863	1.0338	2.5897	0.8497	1.4531	1.8582	1.9366	1.387	-0.481558212	0.451058967	1	no	-	--	-	-	-	-
Unigene0000270	278.6666667	327.3333333	2.0519	1.635	2.0004	2.4412	1.8526	1.5642	1.895766667	1.952666667	0.042664286	0.926312474	1	no	Kirrel	PREDICTED: kin of IRRE-like protein 1 isoform X1 [Sinocyclocheilus rhinocerous]	-	-	-	GO:0044707//single-multicellular organism process;GO:0072010//glomerular epithelium development;GO:0072001//renal system development;GO:0016043//cellular component organization;GO:0048731//system development;GO:0044767//single-organism developmental process;GO:0048513//animal organ development;GO:0032501//multicellular organismal process;GO:0072073//kidney epithelium development;GO:0044763//singl…
Unigene0000271	965.6666667	1217	16.7431	5.8205	19.0907	16.2034	4.678	24.2908	13.88476667	15.0574	0.116969745	0.840664715	1	no	Pim1	PREDICTED: serine/threonine-protein kinase pim-2-like [Sinocyclocheilus rhinocerous]	-	-	-	-
Unigene0000272	2254.666667	1978.333333	38.8699	31.7141	27.8579	24.6069	32.9911	19.1408	32.81396667	25.5796	-0.359316298	0.364353833	1	no	UMPS	PREDICTED: uridine 5'-monophosphate synthase [Sinocyclocheilus rhinocerous]	ko01100//Metabolic pathways//Global and Overview//Metabolism;ko00240//Pyrimidine metabolism//Nucleotide metabolism//Metabolism;ko00983//Drug metabolism - other enzymes//Xenobiotics biodegradation and metabolism//Metabolism	-	GO:0016757//transferase activity, transferring glycosyl groups;GO:0016830//carbon-carbon lyase activity;GO:0016740//transferase activity;GO:0016831//carboxy-lyase activity;GO:0016763//transferase activity, transferring pentosyl groups;GO:0003824//catalytic activity;GO:0016829//lyase activity	GO:0019637//organophosphate metabolic process;GO:0006220//pyrimidine nucleotide metabolic process;GO:0019438//aromatic compound biosynthetic process;GO:0044281//small molecule metabolic process;GO:0044763//single-organism cellular process;GO:0042455//ribonucleoside biosynthetic process;GO:0008152//metabolic process;GO:0046390//ribose phosphate biosynthetic process;GO:0006221//pyrimidine nucleotid…
Unigene0000273	22.66666667	22.33333333	1.8662	1.5373	1.4879	1.5256	1.0018	1.6955	1.630466667	1.407633333	-0.212013364	0.7387041	1	no	-	--	-	-	-	-
Unigene0000274	14	12.33333333	0.1919	0.8097	0.3315	0.1904	0.7739	0.1119	0.444366667	0.358733333	-0.308838794	0.764982654	1	no	UCN3	PREDICTED: urocortin-3-like [Sinocyclocheilus rhinocerous]	ko04080//Neuroactive ligand-receptor interaction//Signaling molecules and interaction//Environmental Information Processing	GO:0044421//extracellular region part;GO:0005576//extracellular region	-	GO:0032501//multicellular organismal process;GO:0044699//single-organism process;GO:0050896//response to stimulus;GO:0044707//single-multicellular organism process
Unigene0000275	1173	956.6666667	9.5265	5.1569	14.3591	8.4183	2.9119	9.0622	9.680833333	6.797466667	-0.51013407	0.322187862	1	no	DNAJB5	PREDICTED: dnaJ homolog subfamily B member 5-like isoform X1 [Sinocyclocheilus rhinocerous]	-	-	GO:0005488//binding;GO:0005515//protein binding	-
Unigene0000276	27	44.66666667	1.2673	0.6043	0.2145	1.6053	1.2997	0.1584	0.695366667	1.021133333	0.55432544	0.502759116	1	no	-	PREDICTED: uncharacterized protein LOC109202850 [Oreochromis niloticus]	-	-	-	-
Unigene0000277	12.33333333	8	1.5474	0.0579	0.6169	0	0.8307	0.4687	0.740733333	0.433133333	-0.774143056	0.495634176	1	no	-	--	-	-	-	-
Unigene0000278	9.666666667	49.66666667	0.2543	0.2682	0.0878	0.0901	1.9519	0.8342	0.203433333	0.958733333	2.236573503	0.013426634	1	no	-	--	-	-	-	-
Unigene0000279	1051	781.3333333	18.4021	15.3267	22.158	12.7114	10.7659	12.9113	18.62893333	12.12953333	-0.619021024	0.121977325	1	no	Mrgbp	PREDICTED: MRG/MORF4L-binding protein isoform X1 [Danio rerio]	-	GO:0031248//protein acetyltransferase complex;GO:0044424//intracellular part;GO:0005623//cell;GO:0043231//intracellular membrane-bounded organelle;GO:1990234//transferase complex;GO:0044428//nuclear part;GO:0070013//intracellular organelle lumen;GO:0005622//intracellular;GO:0005634//nucleus;GO:1902493//acetyltransferase complex;GO:0005654//nucleoplasm;GO:0031974//membrane-enclosed lumen;GO:004322…	-	GO:0032774//RNA biosynthetic process;GO:0009058//biosynthetic process;GO:0034645//cellular macromolecule biosynthetic process;GO:0044260//cellular macromolecule metabolic process;GO:0046483//heterocycle metabolic process;GO:0008152//metabolic process;GO:0006351//transcription, DNA-templated;GO:0016070//RNA metabolic process;GO:0018130//heterocycle biosynthetic process;GO:0034641//cellular nitroge…
Unigene0000280	29.33333333	10.66666667	0.1597	1.1853	0.393	0.1358	0.1486	0.2794	0.579333333	0.187933333	-1.624172699	0.042810384	1	no	F2RL2	PREDICTED: proteinase-activated receptor 3 [Danio rerio]	ko04080//Neuroactive ligand-receptor interaction//Signaling molecules and interaction//Environmental Information Processing	GO:0044425//membrane part;GO:0031224//intrinsic component of membrane;GO:0016020//membrane	GO:0016787//hydrolase activity;GO:0004871//signal transducer activity;GO:0008528//G-protein coupled peptide receptor activity;GO:0060089//molecular transducer activity;GO:0004930//G-protein coupled receptor activity;GO:0001653//peptide receptor activity;GO:0003824//catalytic activity;GO:0099600//transmembrane receptor activity;GO:0004888//transmembrane signaling receptor activity;GO:0004872//rece…	GO:0007186//G-protein coupled receptor signaling pathway;GO:0050789//regulation of biological process;GO:0008152//metabolic process;GO:0051604//protein maturation;GO:0051716//cellular response to stimulus;GO:0007165//signal transduction;GO:0007154//cell communication;GO:0044700//single organism signaling;GO:0010467//gene expression;GO:0043170//macromolecule metabolic process;GO:0050794//regulatio…
Unigene0000281	5.333333333	7	0.7496	0	0.259	0.1062	0.5231	0.5465	0.3362	0.391933333	0.221288553	0.883799964	1	no	drl	PREDICTED: gastrula zinc finger protein XlCGF8.2DB-like [Sinocyclocheilus grahami]	-	-	-	-
Unigene0000282	11.33333333	6.333333333	0.8149	0.7934	0.362	0.3959	0.3792	0.2037	0.656766667	0.326266667	-1.009329306	0.205104971	1	no	-	--	-	-	-	-
Unigene0000283	137.3333333	173.3333333	0.9089	0.8119	0.4765	0.7227	0.995	0.7531	0.732433333	0.8236	0.16924638	0.725040459	1	no	HMCN1	PREDICTED: hemicentin-1-like [Sinocyclocheilus rhinocerous]	-	-	-	GO:0048856//anatomical structure development;GO:0032502//developmental process;GO:0007275//multicellular organism development;GO:0033333//fin development;GO:0044767//single-organism developmental process;GO:0044699//single-organism process;GO:0044707//single-multicellular organism process;GO:0032501//multicellular organismal process;GO:0048736//appendage development
Unigene0000284	301.6666667	285.6666667	6.3277	4.4362	7.3836	4.957	5.3697	4.7703	6.049166667	5.032333333	-0.265508923	0.541288681	1	no	-	--	-	-	-	-
Unigene0000285	10	16.33333333	0.4176	0.4646	0.9274	0.9129	0.4441	1.2004	0.6032	0.852466667	0.499006994	0.488929358	1	no	-	--	-	-	-	-
Unigene0000286	159.6666667	211	2.297	3.7101	2.3086	3.3585	4.2425	2.1924	2.7719	3.264466667	0.235972099	0.627375609	1	no	-	--	-	-	-	-
Unigene0000287	16.33333333	9.333333333	1.2091	0.0561	1.6113	0.1958	0.2143	1.0075	0.958833333	0.472533333	-1.020863961	0.312255999	1	no	-	--	-	-	-	-
Unigene0000288	6.333333333	5.333333333	0.7101	0.2765	0.368	0.2415	0.2643	0.497	0.451533333	0.334266667	-0.433833	0.687852083	1	no	-	--	-	-	-	-
Unigene0000289	283.3333333	246.3333333	3.2041	5.1172	1.8035	2.1528	3.8302	1.9424	3.374933333	2.6418	-0.353337754	0.488204548	1	no	-	--	-	-	-	-
Unigene0000290	20.33333333	19	1.6553	1.5518	0.5084	0.6776	1.141	1.2874	1.2385	1.035333333	-0.25849854	0.737966267	1	no	-	--	-	-	-	-
Unigene0000291	951	1110.333333	5.9644	4.3366	4.0848	4.4891	5.7047	4.6856	4.795266667	4.9598	0.0486709	0.90421361	1	no	GK	PREDICTED: glycerol kinase-like isoform X5 [Sinocyclocheilus anshuiensis]	ko01100//Metabolic pathways//Global and Overview//Metabolism;ko03320//PPAR signaling pathway//Endocrine system//Organismal Systems;ko00561//Glycerolipid metabolism//Lipid metabolism//Metabolism	-	-	-
Unigene0000292	8.333333333	10.66666667	0.9719	0.7885	0.2518	0.4132	0.9798	0.9212	0.670733333	0.7714	0.201739845	0.839585475	1	no	-	--	-	-	-	-
Unigene0000293	237.6666667	383.3333333	1.619	0.963	1.3803	1.6725	2.2624	1.7115	1.320766667	1.882133333	0.510993219	0.244221307	1	no	TTLL7	PREDICTED: tubulin polyglutamylase TTLL7 [Sinocyclocheilus rhinocerous]	-	-	-	GO:0018193//peptidyl-amino acid modification;GO:0043412//macromolecule modification;GO:0044238//primary metabolic process;GO:0009987//cellular process;GO:0008152//metabolic process;GO:0071704//organic substance metabolic process;GO:0044260//cellular macromolecule metabolic process;GO:0019538//protein metabolic process;GO:0043170//macromolecule metabolic process;GO:0018200//peptidyl-glutamic acid …
Unigene0000294	4	6	0.4064	0.3297	0.0702	0	0.3152	0.7704	0.268766667	0.361866667	0.429103999	0.795246466	1	no	-	--	-	-	-	-
Unigene0000295	48.33333333	50.66666667	3.0013	1.5378	3.1653	2.507	1.9109	2.6259	2.568133333	2.347933333	-0.129328661	0.829514388	1	no	-	PREDICTED: SH3 domain-containing protein C23A1.17-like [Sinocyclocheilus anshuiensis]	-	-	-	-
Unigene0000296	81.33333333	59.66666667	8.2892	7.7747	8.6964	5.1568	7.149	3.8031	8.253433333	5.369633333	-0.620170812	0.226929439	1	no	-	--	-	-	-	-
Unigene0000297	71.33333333	72	4.3271	7.9169	3.6344	3.3619	6.9423	4.1123	5.2928	4.8055	-0.139344592	0.807346492	1	no	Wfdc3	PREDICTED: WAP four-disulfide core domain protein 3-like [Sinocyclocheilus anshuiensis]	-	-	-	-
Unigene0000298	652.6666667	713.6666667	7.9353	9.1537	7.9206	9.6321	7.8946	6.5633	8.336533333	8.03	-0.05404759	0.895152834	1	no	Rpp40	PREDICTED: ribonuclease P protein subunit p40-like [Sinocyclocheilus rhinocerous]	ko03013//RNA transport//Translation//Genetic Information Processing;ko03008//Ribosome biogenesis in eukaryotes//Translation//Genetic Information Processing	-	-	-
Unigene0000299	119	176.6666667	1.4857	1.3158	0.8769	1.2983	2.0162	1.5527	1.226133333	1.6224	0.404013687	0.402746228	1	no	-	PREDICTED: CCR4-NOT transcription complex subunit 6-like isoform X4 [Sinocyclocheilus grahami]	-	-	-	-
Unigene0000300	16	25.33333333	1.5753	0.7668	0	0.4186	1.9698	0.9906	0.7807	1.126333333	0.528793675	0.601869946	1	no	-	PREDICTED: uncharacterized protein LOC101885994 [Danio rerio]	-	-	-	-
Unigene0000301	244	316	13.0244	15.4707	17.3104	20.6108	13.9753	17.3385	15.2685	17.3082	0.18089736	0.676229247	1	no	-	--	-	-	-	-
Unigene0000302	12	16.33333333	1.095	0.4664	0.9221	0.6982	1.1463	1.1377	0.827833333	0.994066667	0.264002268	0.756779414	1	no	-	PREDICTED: RNA-directed DNA polymerase from mobile element jockey-like [Danio rerio]	-	-	-	-
Unigene0000303	99.33333333	87.33333333	0.896	0.852	0.3096	0.3189	0.7756	0.5348	0.685866667	0.5431	-0.336710279	0.558054597	1	no	LRFN2	PREDICTED: leucine-rich repeat and fibronectin type-III domain-containing protein 2-like [Sinocyclocheilus grahami]	-	-	-	-
Unigene0000304	162.3333333	143.6666667	8.2269	18.4777	8.2279	9.2036	11.6175	6.8192	11.64416667	9.213433333	-0.337796621	0.515477795	1	no	-	--	-	-	-	-
Unigene0000305	2567.666667	3098.333333	18.1468	18.3465	15.2599	18.6767	19.61	16.9403	17.25106667	18.409	0.093725691	0.799284162	1	no	GANAB	PREDICTED: neutral alpha-glucosidase AB-like isoform X1 [Sinocyclocheilus grahami]	ko01100//Metabolic pathways//Global and Overview//Metabolism;ko04141//Protein processing in endoplasmic reticulum//Folding, sorting and degradation//Genetic Information Processing;ko00510//N-Glycan biosynthesis//Glycan biosynthesis and metabolism//Metabolism	-	-	-
Unigene0000306	615	672.6666667	12.7905	17.8643	10.9383	13.1036	15.0143	12.298	13.86436667	13.47196667	-0.041421241	0.921561451	1	no	-	PREDICTED: TBC1 domain family member 5-like [Sinocyclocheilus grahami]	-	-	GO:0030234//enzyme regulator activity;GO:0005096//GTPase activator activity;GO:0008047//enzyme activator activity;GO:0030695//GTPase regulator activity;GO:0060589//nucleoside-triphosphatase regulator activity;GO:0098772//molecular function regulator	-
Unigene0000307	6.666666667	4.666666667	0.4683	0.2026	0.3775	0.4424	0.0968	0.0911	0.349466667	0.2101	-0.734078691	0.507414417	1	no	-	--	-	-	-	-
Unigene0000308	633.3333333	584.6666667	2.9792	3.2975	3.9725	2.784	1.7183	3.7572	3.4164	2.753166667	-0.311384951	0.478116845	1	no	nphp3	PREDICTED: nephrocystin-3-like [Sinocyclocheilus anshuiensis]	-	-	-	GO:0044767//single-organism developmental process;GO:0048568//embryonic organ development;GO:0048856//anatomical structure development;GO:0032501//multicellular organismal process;GO:0009888//tissue development;GO:0002009//morphogenesis of an epithelium;GO:0009887//organ morphogenesis;GO:0060429//epithelium development;GO:0060562//epithelial tube morphogenesis;GO:0072359//circulatory system devel…
Unigene0000309	10	12	0.969	0.4717	1.0043	0.9611	0.6762	0.9184	0.815	0.8519	0.063884031	0.948609903	1	no	-	--	-	-	-	-
Unigene0000310	21.66666667	2.333333333	1.6279	2.2554	0.1298	0	0.3496	0.0548	1.3377	0.1348	-3.310862204	0.004421225	0.778296617	no	-	Retrovirus-related Pol polyprotein LINE-1 [Larimichthys crocea]	-	-	-	-
Unigene0000311	16	22.33333333	1.5877	1.1241	0.748	1.4726	1.4774	1.3259	1.153266667	1.4253	0.305539471	0.645482137	1	no	PEG10	PREDICTED: C-Jun-amino-terminal kinase-interacting protein 1-like [Cyprinus carpio]	-	-	-	-
Unigene0000312	1283.666667	1320	10.0611	11.7209	9.3233	8.8219	9.9182	9.5728	10.36843333	9.437633333	-0.135700893	0.72425062	1	no	samhd1	PREDICTED: deoxynucleoside triphosphate triphosphohydrolase SAMHD1 isoform X1 [Sinocyclocheilus rhinocerous]	-	GO:0005622//intracellular;GO:0043227//membrane-bounded organelle;GO:0005623//cell;GO:0044424//intracellular part;GO:0043231//intracellular membrane-bounded organelle;GO:0043226//organelle;GO:0043229//intracellular organelle;GO:0044464//cell part	GO:0042578//phosphoric ester hydrolase activity;GO:0032560//guanyl deoxyribonucleotide binding;GO:0046872//metal ion binding;GO:0017076//purine nucleotide binding;GO:0097159//organic cyclic compound binding;GO:0016787//hydrolase activity;GO:0005488//binding;GO:0043167//ion binding;GO:0046914//transition metal ion binding;GO:0003676//nucleic acid binding;GO:1901265//nucleoside phosphate binding;GO…	GO:0009166//nucleotide catabolic process;GO:0046386//deoxyribose phosphate catabolic process;GO:1901564//organonitrogen compound metabolic process;GO:0019637//organophosphate metabolic process;GO:0072521//purine-containing compound metabolic process;GO:0046483//heterocycle metabolic process;GO:0009394//2'-deoxyribonucleotide metabolic process;GO:0006163//purine nucleotide metabolic process;GO:190…
Unigene0000313	10	8	0.8498	0.7584	0.5138	0.2408	0.5272	0.7435	0.707333333	0.503833333	-0.489443677	0.563772496	1	no	-	--	-	-	-	-
Unigene0000314	8.666666667	14.66666667	0.6547	0.8112	0.0617	1.0121	0.4984	0.7811	0.5092	0.763866667	0.585088418	0.486181999	1	no	-	--	-	-	-	-
Unigene0000315	2	7.666666667	0	0.2707	0.1441	0.591	0	0.7907	0.138266667	0.460566667	1.735956607	0.189774209	1	no	-	--	-	-	-	-
Unigene0000316	22.66666667	31.33333333	1.8769	1.0151	1.8733	2.4232	2.0053	1.338	1.588433333	1.922166667	0.275128893	0.668286528	1	no	-	--	-	-	-	-
Unigene0000317	64.33333333	64.66666667	3.4211	2.6196	1.3546	2.8761	1.5023	2.1525	2.4651	2.176966667	-0.179326855	0.75501263	1	no	-	--	-	-	-	-
Unigene0000318	0	1	0	0	0	0	0	0.2873	0.001	0.095766667	6.581451682	0.354651958	1	no	-	--	-	-	-	-
Unigene0000319	48	72.66666667	1.7545	0.7721	0.9466	1.3078	1.5431	1.7874	1.157733333	1.5461	0.417330646	0.4435596	1	no	-	PREDICTED: ATP-binding cassette sub-family G member 2-like [Sinocyclocheilus rhinocerous]	-	-	-	-
Unigene0000320	22.33333333	50.33333333	1.4811	0.8906	0.5418	0.7407	4.9858	0.3049	0.971166667	2.010466667	1.049739607	0.22714957	1	no	-	--	-	-	-	-
Unigene0000321	11.66666667	16.66666667	0.7728	0.7523	0.9466	0.7168	1.5036	0.922	0.8239	1.047466667	0.346363186	0.63177727	1	no	TY3B-I	PREDICTED: adhesion G protein-coupled receptor E1-like [Danio rerio]	ko03013//RNA transport//Translation//Genetic Information Processing	-	-	-
Unigene0000322	57.33333333	43.66666667	0.9377	1.4574	0.4092	0.2657	1.2246	0.4606	0.934766667	0.6503	-0.523500865	0.447981094	1	no	IFIT1	PREDICTED: interferon-induced protein with tetratricopeptide repeats 5-like [Cyprinus carpio]	-	-	-	-
Unigene0000323	14	10.66666667	0.8675	0.3974	0.8992	0.3037	0.1899	0.9376	0.721366667	0.477066667	-0.596541873	0.476862575	1	no	-	--	-	-	-	-
Unigene0000324	131.3333333	156.3333333	2.8458	2.1926	1.8458	2.2563	2.8918	2.1233	2.294733333	2.4238	0.078944149	0.874517763	1	no	FAM46A	PREDICTED: protein FAM46A-like [Sinocyclocheilus rhinocerous]	-	-	-	-
Unigene0000325	3871	4789.666667	35.935	37.0707	31.2055	44.7238	37.5352	31.4013	34.73706667	37.88676667	0.12521809	0.733248117	1	no	stk3	PREDICTED: serine/threonine-protein kinase 3 [Sinocyclocheilus rhinocerous]	ko04010//MAPK signaling pathway//Signal transduction//Environmental Information Processing	GO:0044424//intracellular part;GO:0005622//intracellular;GO:0005623//cell;GO:0043226//organelle;GO:0043229//intracellular organelle;GO:0043227//membrane-bounded organelle;GO:0043231//intracellular membrane-bounded organelle;GO:0044464//cell part	GO:0016301//kinase activity;GO:0016773//phosphotransferase activity, alcohol group as acceptor;GO:0004672//protein kinase activity;GO:0005488//binding;GO:0001883//purine nucleoside binding;GO:0043169//cation binding;GO:0001882//nucleoside binding;GO:0032550//purine ribonucleoside binding;GO:1901363//heterocyclic compound binding;GO:0003824//catalytic activity;GO:0016740//transferase activity;GO:0…	GO:0012501//programmed cell death;GO:0008219//cell death;GO:0009987//cellular process;GO:0016265//death;GO:0051716//cellular response to stimulus;GO:0044699//single-organism process;GO:0006796//phosphate-containing compound metabolic process;GO:0023052//signaling;GO:0044237//cellular metabolic process;GO:0007154//cell communication;GO:0050789//regulation of biological process;GO:0044763//single-o…
Unigene0000326	13.33333333	10	1.031	0.3764	1.2022	0.7123	0.8995	0.1128	0.869866667	0.574866667	-0.597566902	0.47464717	1	no	-	--	-	-	-	-
Unigene0000327	1.333333333	0.333333333	0.2696	0	0	0.0573	0	0	0.089866667	0.0191	-2.234213452	0.534971854	1	no	-	--	-	-	-	-
Unigene0000328	1585.666667	1936.333333	8.6292	4.9332	8.6415	9.6366	4.8446	9.0696	7.4013	7.850266667	0.084962967	0.843771694	1	no	Akna	PREDICTED: AT-hook-containing transcription factor-like isoform X2 [Sinocyclocheilus grahami]	-	-	-	-
Unigene0000329	60.66666667	58.66666667	1.3476	1.312	0.7372	0.923	0.9579	1.0317	1.132266667	0.970866667	-0.221868693	0.674655934	1	no	-	--	-	-	-	-
Unigene0000330	195.6666667	222.6666667	9.3167	7.4976	5.2177	8.9434	7.1314	6.0479	7.344	7.374233333	0.005927008	0.995992127	1	no	-	--	-	-	-	-
Unigene0000331	89.66666667	108.3333333	1.4628	1.0573	0.4479	0.5653	1.3921	1.2604	0.989333333	1.0726	0.116583567	0.845678032	1	no	TC2N	PREDICTED: tandem C2 domains nuclear protein-like [Sinocyclocheilus rhinocerous]	-	-	-	-
Unigene0000332	5.666666667	6.333333333	0.6217	0.1816	0.2578	0.5286	0.1157	0.3808	0.3537	0.3417	-0.049795971	1	1	no	-	--	-	-	-	-
Unigene0000333	78	85.66666667	0.8293	0.7154	0.9248	0.3927	1.2894	0.7439	0.823166667	0.808666667	-0.025639418	0.966119772	1	no	Adgra1	PREDICTED: adhesion G protein-coupled receptor A1 [Danio rerio]	-	-	-	-
Unigene0000334	5.666666667	5.333333333	0.5944	0.2572	0.2738	0.4492	0.3073	0.1734	0.375133333	0.309966667	-0.275290384	0.834803334	1	no	-	--	-	-	-	-
Unigene0000335	5581	4267	42.7256	20.359	70.0618	29.5489	10.6998	47.3188	44.38213333	29.18916667	-0.604545992	0.266855616	1	no	ttll6	PREDICTED: tubulin polyglutamylase ttll6-like [Sinocyclocheilus grahami]	-	GO:0005815//microtubule organizing center;GO:0043229//intracellular organelle;GO:0043232//intracellular non-membrane-bounded organelle;GO:0043226//organelle;GO:0005623//cell;GO:0044424//intracellular part;GO:0043228//non-membrane-bounded organelle;GO:0044422//organelle part;GO:0005622//intracellular;GO:0044446//intracellular organelle part;GO:0044430//cytoskeletal part;GO:0044464//cell part;GO:00…	GO:0070739//protein-glutamic acid ligase activity;GO:0016879//ligase activity, forming carbon-nitrogen bonds;GO:0008092//cytoskeletal protein binding;GO:0005488//binding;GO:0016874//ligase activity;GO:0005515//protein binding;GO:0016881//acid-amino acid ligase activity;GO:0003824//catalytic activity	GO:0018193//peptidyl-amino acid modification;GO:0001578//microtubule bundle formation;GO:0009987//cellular process;GO:0006996//organelle organization;GO:0000226//microtubule cytoskeleton organization;GO:0007017//microtubule-based process;GO:0044238//primary metabolic process;GO:0044763//single-organism cellular process;GO:0071840//cellular component organization or biogenesis;GO:0036211//protein …
Unigene0000336	7.333333333	24	0.2449	0.2781	0.3807	0.798	1.1013	0.7141	0.301233333	0.871133333	1.532012129	0.024509038	1	no	-	--	-	-	-	-
Unigene0000337	24.66666667	24	1.2247	1.1923	1.3752	1.2582	0.9022	1.0716	1.264066667	1.077333333	-0.230607856	0.698888437	1	no	-	--	-	-	-	-
Unigene0000338	208.3333333	282.3333333	4.1811	0.4717	4.1327	1.954	5.5912	2.992	2.9285	3.5124	0.262295257	0.699398365	1	no	prodh2	PREDICTED: probable proline dehydrogenase 2 [Sinocyclocheilus grahami]	ko01100//Metabolic pathways//Global and Overview//Metabolism;ko00330//Arginine and proline metabolism//Amino acid metabolism//Metabolism	-	GO:0016491//oxidoreductase activity;GO:0003824//catalytic activity;GO:0016645//oxidoreductase activity, acting on the CH-NH group of donors	GO:0044238//primary metabolic process;GO:0009987//cellular process;GO:0043648//dicarboxylic acid metabolic process;GO:0006560//proline metabolic process;GO:0071704//organic substance metabolic process;GO:1901605//alpha-amino acid metabolic process;GO:1901564//organonitrogen compound metabolic process;GO:0046483//heterocycle metabolic process;GO:0006807//nitrogen compound metabolic process;GO:0006…
Unigene0000339	5.333333333	4.666666667	0.4717	0.4593	0.1397	0.2865	0.439	0.1179	0.3569	0.281133333	-0.34426538	0.746601086	1	no	-	--	-	-	-	-
Unigene0000340	12.66666667	15.33333333	0.7707	0.8186	1.0893	1.0127	1.4344	0.4291	0.892866667	0.958733333	0.102684842	0.920271533	1	no	PCDHGB7	PREDICTED: protocadherin gamma-B7-like [Sinocyclocheilus anshuiensis]	-	GO:0016020//membrane	-	GO:0007155//cell adhesion;GO:0022610//biological adhesion
Unigene0000341	306	342.3333333	7.6215	2.3316	3.0225	2.6471	6.3842	3.9319	4.3252	4.321066667	-0.001379356	0.999938976	1	no	-	PREDICTED: guanylate cyclase 2G-like [Sinocyclocheilus grahami]	-	-	-	-
Unigene0000342	12.66666667	13	1.9212	0.4676	0.2134	0.525	0.7662	1.0806	0.8674	0.7906	-0.133749488	0.927164672	1	no	-	--	-	-	-	-
Unigene0000343	381.6666667	598.3333333	12.3001	14.0994	11.4808	15.49	16.6148	20.3663	12.62676667	17.49036667	0.470075278	0.248045248	1	no	-	--	-	-	-	-
Unigene0000344	71	62.33333333	0.6448	1.8527	0.8314	0.7355	0.761	1.1008	1.109633333	0.865766667	-0.358032871	0.529354347	1	no	-	PREDICTED: RNA-directed DNA polymerase from mobile element jockey-like [Danio rerio]	-	-	-	-
Unigene0000345	8	13.66666667	0.2441	0.4159	0.8223	0.7783	0.795	0.6407	0.4941	0.738	0.578817761	0.445908063	1	no	-	--	-	-	-	-
Unigene0000346	2192.333333	2954	42.4721	48.5101	30.3246	49.452	50.718	44.7279	40.4356	48.2993	0.256376261	0.501760987	1	no	eed	PREDICTED: polycomb protein EED [Cyprinus carpio]	-	GO:0043231//intracellular membrane-bounded organelle;GO:0005623//cell;GO:0043226//organelle;GO:0044464//cell part;GO:0043227//membrane-bounded organelle;GO:0005622//intracellular;GO:0043229//intracellular organelle;GO:0044424//intracellular part	-	GO:0044238//primary metabolic process;GO:0034645//cellular macromolecule biosynthetic process;GO:0016070//RNA metabolic process;GO:0032774//RNA biosynthetic process;GO:0044249//cellular biosynthetic process;GO:0009987//cellular process;GO:1901360//organic cyclic compound metabolic process;GO:0016043//cellular component organization;GO:0034654//nucleobase-containing compound biosynthetic process;G…
Unigene0000347	7.666666667	13.33333333	0.2966	0.33	0.3514	0.3963	0.5521	0.5561	0.326	0.5015	0.621377736	0.403741254	1	no	-	--	-	-	-	-
Unigene0000348	340	440	2.1907	2.2391	1.1211	1.5746	2.7604	2.0936	1.8503	2.142866667	0.211782883	0.644784093	1	no	grid2	PREDICTED: glutamate receptor ionotropic, delta-2 isoform X1 [Danio rerio]	ko04080//Neuroactive ligand-receptor interaction//Signaling molecules and interaction//Environmental Information Processing	-	-	-
Unigene0000349	24	10	0.2725	0.3367	0.1412	0.0446	0.1463	0.0917	0.250133333	0.0942	-1.408898362	0.042569317	1	no	ADGRD2	PREDICTED: adhesion G-protein coupled receptor D2-like [Sinocyclocheilus anshuiensis]	-	-	-	-
Unigene0000350	34.66666667	58	1.2903	2.0165	0.176	2.3962	2.4645	0.3862	1.160933333	1.748966667	0.591217666	0.473280502	1	no	-	--	-	-	-	-
Unigene0000351	14.33333333	20.66666667	0.8143	0.7173	0.1206	0.7253	0.7938	0.6107	0.550733333	0.709933333	0.366329623	0.633690503	1	no	TRIM16	PREDICTED: tripartite motif-containing protein 16-like, partial [Sinocyclocheilus rhinocerous]	-	-	-	-
Unigene0000352	2.333333333	2	0.2968	0.0722	0.1538	0	0	0.3895	0.174266667	0.129833333	-0.424635813	1	1	no	-	--	-	-	-	-
Unigene0000353	6	15	0.4013	0.7813	0.2496	1.2965	1.3443	0.5618	0.4774	1.067533333	1.161010647	0.148102618	1	no	-	--	-	-	-	-
Unigene0000354	16	23	1.8651	0.6537	1.0826	1.2052	1.0413	2.2846	1.200466667	1.510366667	0.331303485	0.622441596	1	no	-	--	-	-	-	-
Unigene0000355	10	8	0.8802	0.7011	0.8293	0.6123	0.4467	0.6301	0.803533333	0.563033333	-0.513137536	0.48127768	1	no	-	--	-	-	-	-
Unigene0000356	16.33333333	11	1.4677	0.7144	1.1063	0.6807	0.9933	0.2918	1.096133333	0.655266667	-0.742269249	0.308820166	1	no	-	PREDICTED: piggyBac transposable element-derived protein 4-like [Cyprinus carpio]	-	-	-	-
Unigene0000357	5	2.333333333	0.0734	0.5714	0.4563	0.1871	0	0.2568	0.367033333	0.147966667	-1.310638884	0.267972756	1	no	-	--	-	-	-	-
Unigene0000358	13	14.33333333	0.678	0.2475	0.7467	0.3243	0.4732	0.8157	0.5574	0.537733333	-0.051822097	0.960228223	1	no	-	--	-	-	-	-
Unigene0000359	36.33333333	24	2.3625	0.7263	3.8019	1.0572	0.3471	2.5022	2.2969	1.302166667	-0.818773934	0.2966552	1	no	-	--	-	-	-	-
Unigene0000360	581	617	37.2395	53.2098	49.7448	47.3564	32.4122	50.7689	46.73136667	43.5125	-0.102961321	0.806640384	1	no	NDUFB1	PREDICTED: NADH dehydrogenase [ubiquinone] 1 beta subcomplex subunit 1 [Ictalurus punctatus]	ko01100//Metabolic pathways//Global and Overview//Metabolism;ko00190//Oxidative phosphorylation//Energy metabolism//Metabolism	GO:0044464//cell part;GO:0005623//cell;GO:0005622//intracellular;GO:0044424//intracellular part;GO:0043229//intracellular organelle;GO:0043226//organelle;GO:0043231//intracellular membrane-bounded organelle;GO:0043227//membrane-bounded organelle	-	GO:0008152//metabolic process;GO:0044710//single-organism metabolic process;GO:0044699//single-organism process
Unigene0000361	123.3333333	161.6666667	2.7192	1.4078	1.7106	2.3387	2.3987	2.0078	1.945866667	2.2484	0.208485862	0.664910092	1	no	ric3	PREDICTED: protein RIC-3-like isoform X2 [Sinocyclocheilus anshuiensis]	-	-	-	-
Unigene0000362	18	16	1.0563	0.876	0.1622	0.4657	0.9101	0.3081	0.698166667	0.5613	-0.314799419	0.710255433	1	no	-	--	-	-	-	-
Unigene0000363	14.66666667	18.33333333	0.9013	1.4175	0.7186	0.8842	1.4194	1.0919	1.012466667	1.131833333	0.160787121	0.853107855	1	no	-	hypothetical protein XENTR_v900217182mg, partial [Xenopus tropicalis]	-	-	-	-
Unigene0000364	16.33333333	12.33333333	0.8948	0.1742	1.1593	0.1521	0.4163	0.9003	0.742766667	0.489566667	-0.601403741	0.49497733	1	no	-	--	-	-	-	-
Unigene0000365	5	7.666666667	0.4801	0.1558	0.5805	0.2041	1.4147	0.07	0.405466667	0.562933333	0.473380762	0.717812738	1	no	MYO7B	PREDICTED: unconventional myosin-VIIa isoform X1 [Danio rerio]	-	-	-	-
Unigene0000366	172.3333333	194.3333333	2.0878	1.1735	2.3536	1.5464	1.7024	2.2975	1.871633333	1.848766667	-0.017734675	0.973691601	1	no	SLC12A1	PREDICTED: solute carrier family 12 member 1 [Scleropages formosus]	-	GO:0043226//organelle;GO:0031988//membrane-bounded vesicle;GO:0043227//membrane-bounded organelle;GO:0031982//vesicle;GO:0016020//membrane	GO:0005215//transporter activity;GO:0015291//secondary active transmembrane transporter activity;GO:0015294//solute:cation symporter activity;GO:0022892//substrate-specific transporter activity;GO:0008324//cation transmembrane transporter activity;GO:0015103//inorganic anion transmembrane transporter activity;GO:0022891//substrate-specific transmembrane transporter activity;GO:0015377//cation:chl…	GO:0051179//localization;GO:0006811//ion transport;GO:0044699//single-organism process;GO:0044765//single-organism transport;GO:0044763//single-organism cellular process;GO:0006812//cation transport;GO:0051234//establishment of localization;GO:0006820//anion transport;GO:0006821//chloride transport;GO:0009987//cellular process;GO:0030001//metal ion transport;GO:0006810//transport;GO:0015698//inor…
Unigene0000367	9	6.333333333	0.3134	1.2206	0.5685	0.2665	0.3646	0.6856	0.700833333	0.4389	-0.675179124	0.484966628	1	no	-	novel immune-type receptor 1f, allele 2 [Danio rerio]	-	-	-	-
Unigene0000368	25.33333333	37.33333333	0.3376	0.2863	0.2032	0.3796	0.4155	0.2858	0.2757	0.3603	0.386099384	0.520463373	1	no	Cdca4	PREDICTED: cell division cycle-associated protein 4-like isoform X1 [Sinocyclocheilus grahami]	-	-	-	-
Unigene0000369	3.333333333	3.666666667	0.3062	0.4471	0	0.1302	0.3561	0.2679	0.2511	0.2514	0.001722621	1	1	no	-	PREDICTED: cullin-9-like [Sinocyclocheilus rhinocerous]	-	-	-	-
Unigene0000370	3.666666667	2	0.2397	0.1167	0.3105	0.1019	0	0.2097	0.2223	0.103866667	-1.097775216	0.334385391	1	no	-	--	-	-	-	-
Unigene0000371	10.66666667	17	0.6178	0.3208	0.3842	0.5953	0.9582	0.3243	0.440933333	0.625933333	0.505448463	0.504056659	1	no	-	--	-	-	-	-
Unigene0000372	2769	3621	13.7604	15.6358	12.8098	15.5287	18.2335	15.1359	14.06866667	16.29936667	0.212330302	0.563939937	1	no	PER2	PREDICTED: period circadian protein homolog 2-like isoform X1 [Pygocentrus nattereri]	-	-	-	-
Unigene0000373	14	11.66666667	1.337	0.6818	0.6599	0.7578	0.7109	0.5013	0.8929	0.656666667	-0.443337386	0.539882565	1	no	-	--	-	-	-	-
Unigene0000374	5149.666667	7177	65.7908	50.0246	39.314	66.4107	67.0971	57.7029	51.7098	63.7369	0.301691127	0.421381207	1	no	DEK	PREDICTED: protein DEK-like [Sinocyclocheilus grahami]	-	-	GO:0005488//binding;GO:0003676//nucleic acid binding;GO:0097159//organic cyclic compound binding;GO:1901363//heterocyclic compound binding	-
Unigene0000375	18	14.66666667	1.3883	0.6758	0.8302	0.4086	1.3913	0.327	0.964766667	0.708966667	-0.444462264	0.547258737	1	no	-	--	-	-	-	-
Unigene0000376	4	8	0.697	0.1508	0.0803	0.4609	0.5044	0.6776	0.309366667	0.547633333	0.823892504	0.415663971	1	no	-	--	-	-	-	-
Unigene0000377	21.66666667	13.66666667	1.1107	0.2911	1.4168	0.2179	0.5168	0.8223	0.939533333	0.519	-0.856209809	0.27529517	1	no	-	PREDICTED: neuron navigator 3-like [Poecilia mexicana]	-	-	-	-
Unigene0000378	123	181.6666667	1.7476	1.4989	0.5714	1.5124	2.3522	1.1923	1.272633333	1.685633333	0.405473934	0.45683942	1	no	nrarpb	PREDICTED: notch-regulated ankyrin repeat-containing protein B isoform X1 [Danio rerio]	-	-	-	-
Unigene0000379	10.66666667	15.33333333	0.9389	0	0.3244	0.7983	0.2184	0.5477	0.4211	0.521466667	0.30841216	0.783116428	1	no	-	--	-	-	-	-
Unigene0000380	233.6666667	169	4.1502	3.1898	5.528	2.9869	2.0326	3.0897	4.289333333	2.703066667	-0.666156341	0.154035953	1	no	Rasd1	dexamethasone-induced Ras-related protein 1 [Danio rerio]	-	-	GO:0036094//small molecule binding;GO:0005488//binding	GO:0019693//ribose phosphate metabolic process;GO:0035556//intracellular signal transduction;GO:0006793//phosphorus metabolic process;GO:0009987//cellular process;GO:0006163//purine nucleotide metabolic process;GO:0071704//organic substance metabolic process;GO:0009117//nucleotide metabolic process;GO:0051716//cellular response to stimulus;GO:0046483//heterocycle metabolic process;GO:0034641//cel…
Unigene0000381	8848.333333	6560	418.3794	230.8398	757.8573	307.9263	96.1505	492.1987	469.0255	298.7585	-0.650686601	0.242095569	1	no	DYNLRB2	PREDICTED: dynein light chain roadblock-type 2 [Astyanax mexicanus]	-	-	-	-
Unigene0000382	12	14.33333333	0.3159	0.6664	0.9278	0.1791	0.49	1.336	0.6367	0.668366667	0.07002602	1	1	no	-	--	-	-	-	-
Unigene0000383	23	12	1.1374	1.1864	3.3682	1.2433	0.8316	0.4976	1.897333333	0.8575	-1.145764585	0.122117374	1	no	-	--	-	-	-	-
Unigene0000384	258	187	2.872	3.4061	1.7752	1.8824	1.8465	1.4529	2.684433333	1.727266667	-0.636126744	0.168524317	1	no	eif3a	PREDICTED: protein LIAT1 [Pseudopodoces humilis]	-	-	-	-
Unigene0000385	106.6666667	188.3333333	3.218	1.1974	0.9779	1.3752	4.4368	2.7418	1.797766667	2.851266667	0.66539719	0.269071562	1	no	foxa2	PREDICTED: hepatocyte nuclear factor 3-beta [Sinocyclocheilus rhinocerous]	-	-	-	-
Unigene0000386	1481.333333	1336	3.697	4.5638	8.338	3.7813	2.5732	6.6535	5.532933333	4.336	-0.351679784	0.458649181	1	no	IGSF3	PREDICTED: immunoglobulin superfamily member 3-like [Sinocyclocheilus rhinocerous]	-	-	-	-
Unigene0000387	19.66666667	22.33333333	0.9293	0.769	1.0595	1.2642	0.5621	0.8944	0.919266667	0.9069	-0.019539949	1	1	no	pol	Pro-Pol polyprotein [Larimichthys crocea]	-	-	-	-
Unigene0000388	172	120.3333333	0.7666	2.897	0.5297	0.6518	1.0969	0.9015	1.397766667	0.8834	-0.66198481	0.290510222	1	no	Rasa4	PREDICTED: ras GTPase-activating protein 4-like isoform X1 [Sinocyclocheilus anshuiensis]	-	-	-	-
Unigene0000389	7	5.333333333	0.3191	0.8543	0.4961	0.407	0.5196	0.2094	0.5565	0.378666667	-0.555453259	0.56315078	1	no	FRRS1	si:dkey-251i10.2 precursor [Danio rerio]	-	-	-	-
Unigene0000390	13	10.33333333	1.4467	0.2167	0.519	0.4731	0.6213	0.4381	0.727466667	0.510833333	-0.510028476	0.52716812	1	no	-	PREDICTED: contactin-3-like [Sinocyclocheilus anshuiensis]	-	-	-	-
Unigene0000391	1445.333333	1297.666667	18.7692	13.1665	31.4647	14.2136	11.5092	23.7667	21.13346667	16.4965	-0.357369476	0.436067696	1	no	cyhr1	PREDICTED: cysteine and histidine-rich protein 1 [Sinocyclocheilus rhinocerous]	-	GO:0005623//cell;GO:0005622//intracellular;GO:0044424//intracellular part;GO:0044464//cell part	GO:0046872//metal ion binding;GO:0005488//binding;GO:0043169//cation binding;GO:0043167//ion binding;GO:0046914//transition metal ion binding	GO:0070647//protein modification by small protein conjugation or removal;GO:0043412//macromolecule modification;GO:0008152//metabolic process;GO:0044260//cellular macromolecule metabolic process;GO:0009987//cellular process;GO:0019538//protein metabolic process;GO:0043170//macromolecule metabolic process;GO:0071704//organic substance metabolic process;GO:0044237//cellular metabolic process;GO:004…
Unigene0000392	617	621.3333333	13.894	7.3312	6.8628	12.032	9.0375	3.8312	9.362666667	8.300233333	-0.173767602	0.729736326	1	no	fsta	PREDICTED: follistatin-A-like [Sinocyclocheilus rhinocerous]	ko04350//TGF-beta signaling pathway//Signal transduction//Environmental Information Processing	-	-	-
Unigene0000393	252.3333333	228	2.1115	2.4278	2.3678	1.509	2.4222	1.6165	2.302366667	1.849233333	-0.316190337	0.47649984	1	no	Pacs1	PREDICTED: phosphofurin acidic cluster sorting protein 2-like isoform X2 [Sinocyclocheilus anshuiensis]	-	-	-	-
Unigene0000394	4.666666667	3	0.4464	0.2173	0.3855	0.1898	0.1385	0.2604	0.349733333	0.196233333	-0.83368518	0.387443565	1	no	-	--	-	-	-	-
Unigene0000395	17	26	0.7529	0.6037	0.9181	1.5439	0.5358	0.93	0.758233333	1.003233333	0.403943402	0.561997998	1	no	-	--	-	-	-	-
Unigene0000396	713.3333333	1001.333333	4.8401	7.2641	3.4912	5.9268	7.8767	5.7403	5.198466667	6.5146	0.325590449	0.450231501	1	no	MAPT	PREDICTED: microtubule-associated protein tau-like isoform X3 [Sinocyclocheilus anshuiensis]	ko04010//MAPK signaling pathway//Signal transduction//Environmental Information Processing	-	-	-
Unigene0000397	34	30.33333333	2.019	1.6766	2.4004	1.8176	0.4973	2.39	2.032	1.5683	-0.373698843	0.57041775	1	no	-	--	-	-	-	-
Unigene0000398	5.666666667	15.66666667	0.2096	0.4762	0.507	1.3665	0.5202	0.9783	0.3976	0.955	1.264182976	0.096833479	1	no	-	--	-	-	-	-
Unigene0000399	12.33333333	12	1.4751	0.7833	0.2085	0.4561	0.5615	1.1146	0.8223	0.710733333	-0.210356466	0.84039305	1	no	-	--	-	-	-	-
Unigene0000400	925	774.3333333	8.9872	8.0977	14.7018	6.493	6.779	10.0077	10.59556667	7.7599	-0.449350781	0.297241592	1	no	TMEM104	PREDICTED: transmembrane protein 104-like [Sinocyclocheilus grahami]	-	GO:0044425//membrane part;GO:0016020//membrane;GO:0031224//intrinsic component of membrane	-	-
Unigene0000401	32.66666667	39.66666667	1.2493	2.1892	1.4502	1.8694	2.6505	0.787	1.629566667	1.768966667	0.118418488	0.86100708	1	no	-	--	-	-	-	-
Unigene0000402	14.66666667	18.66666667	0.3994	0.2991	0.6688	0.5486	0.6862	0.2957	0.455766667	0.510166667	0.162673225	0.825970613	1	no	-	--	-	-	-	-
Unigene0000403	1491.333333	1762.333333	12.3811	14.6929	10.6881	14.7632	13.7058	10.9877	12.58736667	13.15223333	0.063331303	0.870278565	1	no	Fnta	protein farnesyltransferase/geranylgeranyltransferase type-1 subunit alpha [Danio rerio]	ko01130//Biosynthesis of antibiotics//Global and Overview//Metabolism;ko00900//Terpenoid backbone biosynthesis//Metabolism of terpenoids and polyketides//Metabolism	-	GO:0003824//catalytic activity;GO:0016740//transferase activity;GO:0016765//transferase activity, transferring alkyl or aryl (other than methyl) groups;GO:0004659//prenyltransferase activity	-
Unigene0000404	82	76.66666667	2.2504	1.6665	0.7974	1.619	1.4497	0.8414	1.571433333	1.303366667	-0.269838064	0.637454919	1	no	-	--	-	-	-	-
Unigene0000405	2873.666667	2576.666667	32.2138	21.5605	37.7549	25.4281	14.3266	31.5846	30.50973333	23.77976667	-0.359535011	0.397539674	1	no	b3gnt5a	PREDICTED: lactosylceramide 1,3-N-acetyl-beta-D-glucosaminyltransferase [Cyprinus carpio]	ko01100//Metabolic pathways//Global and Overview//Metabolism;ko00601//Glycosphingolipid biosynthesis - lacto and neolacto series//Glycan biosynthesis and metabolism//Metabolism	GO:0044424//intracellular part;GO:0043227//membrane-bounded organelle;GO:0044425//membrane part;GO:0005623//cell;GO:0044446//intracellular organelle part;GO:0005737//cytoplasm;GO:0016020//membrane;GO:0043226//organelle;GO:0012505//endomembrane system;GO:0044444//cytoplasmic part;GO:0043231//intracellular membrane-bounded organelle;GO:0044422//organelle part;GO:0005794//Golgi apparatus;GO:0044464/…	GO:0003824//catalytic activity;GO:0008194//UDP-glycosyltransferase activity;GO:0016758//transferase activity, transferring hexosyl groups;GO:0008375//acetylglucosaminyltransferase activity;GO:0016740//transferase activity;GO:0016757//transferase activity, transferring glycosyl groups	GO:0044237//cellular metabolic process;GO:0009987//cellular process;GO:0006464//cellular protein modification process;GO:0043170//macromolecule metabolic process;GO:0019538//protein metabolic process;GO:0071704//organic substance metabolic process;GO:0044238//primary metabolic process;GO:0043412//macromolecule modification;GO:0008152//metabolic process;GO:0036211//protein modification process;GO:…
Unigene0000406	1276	1307.333333	12.8866	9.3273	13.8712	11.2511	9.7605	11.3814	12.02836667	10.79766667	-0.155721167	0.692434447	1	no	e4f1	PREDICTED: transcription factor E4F1 isoform X2 [Sinocyclocheilus rhinocerous]	-	GO:0005634//nucleus;GO:0070013//intracellular organelle lumen;GO:0043226//organelle;GO:0043227//membrane-bounded organelle;GO:0005622//intracellular;GO:0043229//intracellular organelle;GO:0044464//cell part;GO:0044422//organelle part;GO:0044424//intracellular part;GO:0031974//membrane-enclosed lumen;GO:0043233//organelle lumen;GO:0031981//nuclear lumen;GO:0005623//cell;GO:0044428//nuclear part;GO…	GO:0003824//catalytic activity;GO:1901363//heterocyclic compound binding;GO:0097159//organic cyclic compound binding;GO:0005488//binding;GO:0003676//nucleic acid binding	GO:0044238//primary metabolic process;GO:0018130//heterocycle biosynthetic process;GO:0034654//nucleobase-containing compound biosynthetic process;GO:0044267//cellular protein metabolic process;GO:0032446//protein modification by small protein conjugation;GO:0044237//cellular metabolic process;GO:0043412//macromolecule modification;GO:0044271//cellular nitrogen compound biosynthetic process;GO:00…
Unigene0000407	5.333333333	10.33333333	0.4815	0.4018	0.2139	0.4679	0.7042	0.7223	0.365733333	0.631466667	0.787914459	0.34406491	1	no	-	--	-	-	-	-
Unigene0000408	4.333333333	7.333333333	0.5222	0.1453	0.3093	0.5075	0.6942	0.2611	0.3256	0.4876	0.582597426	0.555757034	1	no	-	--	-	-	-	-
Unigene0000409	568	696.3333333	5.4378	5.0503	2.8059	4.5369	6.4798	3.5392	4.431333333	4.851966667	0.130828786	0.771281554	1	no	DACH2	PREDICTED: dachshund homolog 2-like isoform X1 [Cyprinus carpio]	-	GO:0043229//intracellular organelle;GO:0044464//cell part;GO:0043227//membrane-bounded organelle;GO:0044424//intracellular part;GO:0005622//intracellular;GO:0005623//cell;GO:0043231//intracellular membrane-bounded organelle;GO:0043226//organelle	-	GO:0044707//single-multicellular organism process;GO:0044767//single-organism developmental process;GO:0007275//multicellular organism development;GO:0048856//anatomical structure development;GO:0048731//system development;GO:0032501//multicellular organismal process;GO:0044699//single-organism process;GO:0031016//pancreas development;GO:0048513//animal organ development;GO:0032502//developmental…
Unigene0000410	26.66666667	40	0.9842	1.2631	1.3447	1.8258	1.6236	1.2917	1.197333333	1.580366667	0.400434473	0.467542158	1	no	-	--	-	-	-	-
Unigene0000411	9.333333333	9.333333333	0.4636	0.3949	0.7809	0.6898	0.1079	0.6085	0.546466667	0.468733333	-0.221366103	0.84542432	1	no	-	--	-	-	-	-
Unigene0000412	3361.666667	4272.333333	29.7135	35.2504	29.776	39.0039	33.0728	34.0115	31.57996667	35.36273333	0.163220143	0.653348392	1	no	ankrd13c	PREDICTED: ankyrin repeat domain-containing protein 13C [Sinocyclocheilus anshuiensis]	-	GO:0043226//organelle;GO:0043231//intracellular membrane-bounded organelle;GO:0043229//intracellular organelle;GO:0044424//intracellular part;GO:0044464//cell part;GO:0042175//nuclear outer membrane-endoplasmic reticulum membrane network;GO:0016020//membrane;GO:0005622//intracellular;GO:0005623//cell;GO:0043227//membrane-bounded organelle;GO:0012505//endomembrane system	-	-
Unigene0000413	19	26.66666667	0.4887	0.7929	0.574	0.8309	1.061	0.4275	0.618533333	0.773133333	0.321865895	0.629387718	1	no	FRAS1	PREDICTED: extracellular matrix protein FRAS1-like [Sinocyclocheilus rhinocerous]	-	-	-	GO:0009790//embryo development;GO:0048598//embryonic morphogenesis;GO:0009987//cellular process;GO:0043062//extracellular structure organization;GO:0048736//appendage development;GO:0032501//multicellular organismal process;GO:0044707//single-multicellular organism process;GO:0016043//cellular component organization;GO:0030198//extracellular matrix organization;GO:0033333//fin development;GO:0009…
Unigene0000414	21.33333333	27.66666667	1.3984	0.5363	0.7906	0.9728	0.9069	1.2235	0.908433333	1.0344	0.187341631	0.768107991	1	no	-	--	-	-	-	-
Unigene0000415	22.66666667	15.66666667	0.6751	0.7584	2.153	0.6623	1.1598	0.3635	1.1955	0.728533333	-0.714547242	0.343539208	1	no	-	PREDICTED: protocadherin Fat 2-like [Sinocyclocheilus grahami]	-	-	-	-
Unigene0000416	50.33333333	41.66666667	0.7502	0.7644	1.1393	0.4747	1.3313	0.1679	0.884633333	0.657966667	-0.427065107	0.545117881	1	no	-	--	-	-	-	-
Unigene0000417	11.66666667	8	1.2136	0.7645	0.5179	0.2428	0.465	0.812	0.832	0.5066	-0.715736451	0.395437347	1	no	-	--	-	-	-	-
Unigene0000418	24.33333333	31.66666667	1.4549	0.2897	0.6854	0.9277	1.0153	0.839	0.81	0.927333333	0.195166106	0.789777206	1	no	Gtf2ird2	general transcription factor II-I repeat domain-containing protein 2B-like [Alligator mississippiensis]	-	-	-	-
Unigene0000419	23.33333333	15	0.9307	0.7928	1.0048	0.3956	0.5773	0.5768	0.909433333	0.516566667	-0.816013333	0.17485813	1	no	-	--	-	-	-	-
Unigene0000420	1085.666667	1175	12.9437	14.5329	11.4586	13.7589	12.6118	10.8438	12.9784	12.40483333	-0.065210184	0.868062685	1	no	ZDHHC6	PREDICTED: palmitoyltransferase ZDHHC6 [Sinocyclocheilus grahami]	-	GO:0016020//membrane;GO:0031224//intrinsic component of membrane;GO:0044425//membrane part	GO:0016740//transferase activity;GO:0046914//transition metal ion binding;GO:0005488//binding;GO:0003824//catalytic activity;GO:0016746//transferase activity, transferring acyl groups;GO:0043169//cation binding;GO:0016409//palmitoyltransferase activity;GO:0016747//transferase activity, transferring acyl groups other than amino-acyl groups;GO:0046872//metal ion binding;GO:0043167//ion binding	-
Unigene0000421	6	9	0.6061	0.118	0.3769	0.5153	0.282	0.6363	0.367	0.477866667	0.380828074	0.685817343	1	no	-	--	-	-	-	-
Unigene0000422	631	823.3333333	12.7877	11.3338	10.3696	14.5842	14.5231	10.6473	11.49703333	13.25153333	0.204897664	0.61272924	1	no	BMS1	ribosome biogenesis protein BMS1 homolog [Danio rerio]	ko03008//Ribosome biogenesis in eukaryotes//Translation//Genetic Information Processing	GO:0044424//intracellular part;GO:0005622//intracellular;GO:0043227//membrane-bounded organelle;GO:0043226//organelle;GO:0005623//cell;GO:0044464//cell part;GO:0043231//intracellular membrane-bounded organelle;GO:0043229//intracellular organelle	GO:0001883//purine nucleoside binding;GO:0003824//catalytic activity;GO:0005488//binding;GO:1901363//heterocyclic compound binding;GO:0032550//purine ribonucleoside binding;GO:0016818//hydrolase activity, acting on acid anhydrides, in phosphorus-containing anhydrides;GO:0032549//ribonucleoside binding;GO:0016462//pyrophosphatase activity;GO:0097159//organic cyclic compound binding;GO:0036094//sma…	GO:0044085//cellular component biogenesis;GO:0022613//ribonucleoprotein complex biogenesis;GO:0044767//single-organism developmental process;GO:0071840//cellular component organization or biogenesis;GO:0044699//single-organism process;GO:0042254//ribosome biogenesis;GO:0032502//developmental process
Unigene0000423	8	9.333333333	0.7025	0.8207	0.1456	0.4778	0.3922	0.8605	0.556266667	0.576833333	0.052377879	1	1	no	-	--	-	-	-	-
Unigene0000424	1084.333333	1171.333333	6.4263	5.3487	7.4143	5.5286	6.0508	6.6486	6.396433333	6.076	-0.074145809	0.850821386	1	no	FBXO30	PREDICTED: F-box only protein 30-like [Sinocyclocheilus rhinocerous]	-	-	GO:0043169//cation binding;GO:0016740//transferase activity;GO:0043167//ion binding;GO:0005488//binding;GO:0003824//catalytic activity;GO:0046914//transition metal ion binding;GO:0046872//metal ion binding;GO:0019787//ubiquitin-like protein transferase activity	GO:0070647//protein modification by small protein conjugation or removal;GO:0044260//cellular macromolecule metabolic process;GO:0043412//macromolecule modification;GO:0044237//cellular metabolic process;GO:0044238//primary metabolic process;GO:0044267//cellular protein metabolic process;GO:0019538//protein metabolic process;GO:0009987//cellular process;GO:0043170//macromolecule metabolic process…
Unigene0000425	11	4.666666667	0.8149	0.7273	0.7039	0.1155	0.4424	0.2971	0.7487	0.285	-1.393425835	0.078356384	1	no	VWA1	PREDICTED: von Willebrand factor A domain-containing protein 1 [Ictalurus punctatus]	-	-	-	-
Unigene0000426	845.3333333	1017	6.4783	6.5681	4.8422	6.5401	7.2695	5.2729	5.962866667	6.360833333	0.093209708	0.817435662	1	no	Wdr6	PREDICTED: WD repeat-containing protein 6-like [Sinocyclocheilus rhinocerous]	-	-	-	-
Unigene0000427	0	0	0	0	0	0	0	0	0.001	0.001	0	notest	notest	notest	-	--	-	-	-	-
Unigene0000428	36.33333333	76.66666667	0.3379	1.6953	0.7812	1.0386	2.1525	2.1376	0.938133333	1.776233333	0.920956225	0.153207052	1	no	-	--	-	-	-	-
Unigene0000429	125.3333333	5	0.127	11.501	0	0.054	0.1773	0.1945	3.876	0.141933333	-4.771283217	0.002322052	0.566350068	no	-	PREDICTED: sorting nexin-10A-like [Cyprinus carpio]	-	-	-	-
Unigene0000430	2628.666667	2880.333333	23.2525	22.8036	18.0061	21.441	22.5669	18.1202	21.35406667	20.70936667	-0.044227409	0.905832518	1	no	PISD	PREDICTED: phosphatidylserine decarboxylase proenzyme, mitochondrial isoform X4 [Sinocyclocheilus grahami]	ko01100//Metabolic pathways//Global and Overview//Metabolism;ko01110//Biosynthesis of secondary metabolites//Global and Overview//Metabolism;ko00564//Glycerophospholipid metabolism//Lipid metabolism//Metabolism	-	GO:0016829//lyase activity;GO:0016831//carboxy-lyase activity;GO:0003824//catalytic activity;GO:0016830//carbon-carbon lyase activity	GO:0008152//metabolic process;GO:0044710//single-organism metabolic process;GO:0044699//single-organism process;GO:0044763//single-organism cellular process;GO:0006793//phosphorus metabolic process;GO:0044255//cellular lipid metabolic process;GO:0019637//organophosphate metabolic process;GO:0006629//lipid metabolic process;GO:0006796//phosphate-containing compound metabolic process;GO:0044237//ce…
Unigene0000431	1421	1335.333333	22.4305	33.0636	9.667	20.3293	23.9423	10.6016	21.72036667	18.29106667	-0.247909248	0.617804791	1	no	Tpm4	PREDICTED: tropomyosin alpha-4 chain isoform X3 [Sinocyclocheilus grahami]	ko04261//Adrenergic signaling in cardiomyocytes//Circulatory system//Organismal Systems;ko04260//Cardiac muscle contraction//Circulatory system//Organismal Systems	-	-	GO:0044699//single-organism process;GO:0030036//actin cytoskeleton organization;GO:0032501//multicellular organismal process;GO:0007010//cytoskeleton organization;GO:0006996//organelle organization;GO:1902589//single-organism organelle organization;GO:0048468//cell development;GO:0070925//organelle assembly;GO:0022607//cellular component assembly;GO:0055001//muscle cell development;GO:0044085//ce…
Unigene0000432	13678.66667	19312	119.5741	136.615	96.7169	151.0043	156.1774	134.0722	117.6353333	147.0846333	0.322325071	0.3729656	1	no	mcm4	PREDICTED: DNA replication licensing factor mcm4 [Sinocyclocheilus rhinocerous]	ko04110//Cell cycle//Cell growth and death//Cellular Processes;ko03030//DNA replication//Replication and repair//Genetic Information Processing	GO:0032991//macromolecular complex;GO:0043234//protein complex	GO:0016787//hydrolase activity;GO:0032549//ribonucleoside binding;GO:0005488//binding;GO:0001882//nucleoside binding;GO:1901363//heterocyclic compound binding;GO:0032550//purine ribonucleoside binding;GO:0097159//organic cyclic compound binding;GO:0001883//purine nucleoside binding;GO:0016818//hydrolase activity, acting on acid anhydrides, in phosphorus-containing anhydrides;GO:0003676//nucleic a…	GO:0051704//multi-organism process;GO:0050896//response to stimulus;GO:0006996//organelle organization;GO:0009607//response to biotic stimulus;GO:0051707//response to other organism;GO:0032392//DNA geometric change;GO:0016043//cellular component organization;GO:0009620//response to fungus;GO:0051276//chromosome organization;GO:0009987//cellular process;GO:0043207//response to external biotic stim…
Unigene0000433	7.666666667	3	0.3589	0.6988	0.5951	0	0.4675	0.1256	0.550933333	0.1977	-1.478564882	0.185846632	1	no	-	PREDICTED: trichohyalin-like isoform X1 [Sinocyclocheilus grahami]	-	-	-	-
Unigene0000434	486.6666667	688.3333333	4.8137	4.9161	4.06	5.7218	6.1481	5.3843	4.5966	5.7514	0.323346051	0.418885068	1	no	ATXN7L2	PREDICTED: ataxin-7-like protein 2 [Sinocyclocheilus anshuiensis]	-	-	-	-
Unigene0000435	0.666666667	0.666666667	0	0	0.1433	0	0.1287	0	0.047766667	0.0429	-0.155026556	1	1	no	-	--	-	-	-	-
Unigene0000436	8.333333333	16	0.439	0.7835	0.6067	0.622	1.2935	1.2162	0.609733333	1.0439	0.775733193	0.308834992	1	no	-	--	-	-	-	-
Unigene0000437	52.66666667	86.66666667	2.2028	3.6906	2.177	4.704	3.2892	3.7202	2.690133333	3.904466667	0.537447816	0.301223263	1	no	-	--	-	-	-	-
Unigene0000438	22.66666667	38.66666667	0.78	0.8914	0.6327	1.211	0.9467	1.3055	0.768033333	1.1544	0.587902373	0.293422594	1	no	Slc12a5	PREDICTED: solute carrier family 12 member 5-like [Sinocyclocheilus rhinocerous]	-	-	-	-
Unigene0000439	386.6666667	387.6666667	28.4695	38.7139	21.0432	33.0959	24.006	21.0356	29.40886667	26.04583333	-0.175198591	0.692677321	1	no	-	--	-	-	-	-
Unigene0000440	309.3333333	325	3.5774	2.9837	3.1766	4.5801	2.4626	1.8944	3.2459	2.979033333	-0.123774287	0.792399854	1	no	-	PREDICTED: uncharacterized protein LOC107572457 [Sinocyclocheilus grahami]	-	-	-	-
Unigene0000441	1861	1990	15.2715	16.1533	13.29	15.2435	13.9202	13.0323	14.90493333	14.06533333	-0.083646179	0.823590443	1	no	GABPA	PREDICTED: GA-binding protein alpha chain-like isoform X1 [Sinocyclocheilus grahami]	-	-	-	-
Unigene0000442	88.66666667	90.33333333	2.3438	1.9522	2.6722	2.3027	1.6963	2.2102	2.322733333	2.069733333	-0.16637863	0.739092985	1	no	-	PREDICTED: zinc finger MYM-type protein 4-like [Cyprinus carpio]	-	-	-	-
Unigene0000443	8.333333333	7.666666667	0.3933	0.7021	0.5436	0.5016	0.427	0.4015	0.546333333	0.443366667	-0.301281139	0.740202607	1	no	-	--	-	-	-	-
Unigene0000444	153.6666667	176	1.4418	2.2682	1.0829	1.3413	2.3333	1.2523	1.597633333	1.6423	0.03978135	0.939576401	1	no	-	--	-	-	-	-
Unigene0000445	15	10	1.0575	0.4212	0.6975	0.5313	0.1342	0.5888	0.7254	0.4181	-0.794928702	0.319401694	1	no	-	--	-	-	-	-
Unigene0000446	16	27.66666667	1.2105	0.8485	0.2509	0.8233	1.8473	0.932	0.769966667	1.200866667	0.641208081	0.377744516	1	no	-	--	-	-	-	-
Unigene0000447	175.6666667	224	1.4688	2.0199	1.3416	1.8889	2.409	1.1887	1.6101	1.828866667	0.183799605	0.704932738	1	no	LOXL3	PREDICTED: lysyl oxidase homolog 3-like isoform X1 [Sinocyclocheilus rhinocerous]	-	-	GO:0046914//transition metal ion binding;GO:0043169//cation binding;GO:0038024//cargo receptor activity;GO:0046872//metal ion binding;GO:0005488//binding;GO:0060089//molecular transducer activity;GO:0043167//ion binding;GO:0004872//receptor activity	GO:0044699//single-organism process;GO:0008152//metabolic process;GO:0044710//single-organism metabolic process
Unigene0000448	16.33333333	19	0.711	0.1384	0.9212	0.665	0.6947	0.4355	0.5902	0.5984	0.019906254	1	1	no	-	--	-	-	-	-
Unigene0000449	24	16.66666667	1.7878	0.4453	0.7757	0.8484	0.3482	0.6184	1.002933333	0.605	-0.729218663	0.301297913	1	no	-	--	-	-	-	-
Unigene0000450	18.66666667	14.66666667	2.2132	0.1436	1.8352	1.3172	0.2746	1.2264	1.397333333	0.9394	-0.572864717	0.548538404	1	no	-	--	-	-	-	-
Unigene0000451	983.3333333	1095.333333	66.1018	82.0938	69.6601	72.8862	69.3362	71.9058	72.61856667	71.37606667	-0.024898054	0.949715825	1	no	MP68	PREDICTED: 6.8 kDa mitochondrial proteolipid [Sinocyclocheilus anshuiensis]	-	GO:0044464//cell part;GO:0005623//cell;GO:0044424//intracellular part;GO:0043227//membrane-bounded organelle;GO:0005622//intracellular;GO:0043231//intracellular membrane-bounded organelle;GO:0043229//intracellular organelle;GO:0043226//organelle	-	-
Unigene0000452	15	19.66666667	1.3527	1.109	0.7379	0.9685	1.2588	1.495	1.066533333	1.240766667	0.218302778	0.752749036	1	no	-	--	-	-	-	-
Unigene0000453	55.66666667	42.33333333	2.4958	0.544	3.2818	1.0768	0.1733	2.868	2.1072	1.3727	-0.618310888	0.46189488	1	no	-	--	-	-	-	-
Unigene0000454	279	343.6666667	17.9227	24.9368	17.8244	23.9988	21.8094	20.2521	20.22796667	22.0201	0.122469714	0.774856243	1	no	-	--	-	-	-	-
Unigene0000455	298	266	2.1866	1.4098	2.9417	1.4897	1.6978	1.9258	2.179366667	1.704433333	-0.354616771	0.437992815	1	no	RNF157	PREDICTED: RING finger protein 157-like isoform X1 [Sinocyclocheilus anshuiensis]	-	-	GO:0043169//cation binding;GO:0043167//ion binding;GO:0005488//binding	-
Unigene0000456	3	20	0	0.2057	0.4381	0.7786	0.7866	2.157	0.2146	1.240733333	2.531471094	0.007404222	0.918723542	no	-	--	-	-	-	-
Unigene0000457	16	36.33333333	0.6325	0.2309	1.0653	0.8066	0.1471	2.8015	0.6429	1.251733333	0.96126099	0.283628535	1	no	-	--	-	-	-	-
Unigene0000458	9.333333333	13.66666667	0.7825	0.4102	0.4991	0.7165	0.9522	0.5266	0.563933333	0.731766667	0.375859079	0.619666302	1	no	-	--	-	-	-	-
Unigene0000459	1171.666667	1184.666667	9.8051	10.3573	10.1183	9.2572	9.7477	8.0299	10.09356667	9.0116	-0.163580873	0.671526771	1	no	cdc37l1	PREDICTED: hsp90 co-chaperone Cdc37-like 1 isoform X3 [Sinocyclocheilus anshuiensis]	-	GO:0044464//cell part;GO:0005623//cell;GO:0005622//intracellular;GO:0044424//intracellular part	-	-
Unigene0000460	70.66666667	60	2.5397	7.9826	4.8134	3.2081	3.9162	4.444	5.1119	3.8561	-0.406717149	0.476072405	1	no	-	--	-	-	-	-
Unigene0000461	1.666666667	2	0	0	0.5994	0	0.1076	0.5059	0.1998	0.2045	0.03354426	1	1	no	-	--	-	-	-	-
Unigene0000462	4.666666667	6.333333333	0.2951	0.6464	0.0765	0.2509	0.6865	0.3227	0.339333333	0.420033333	0.307800667	0.850038214	1	no	-	--	-	-	-	-
Unigene0000463	23.66666667	35.66666667	1.009	0.9413	1.0458	0.7149	2.934	0.4414	0.9987	1.363433333	0.449120883	0.553121164	1	no	gata3	PREDICTED: trans-acting T-cell-specific transcription factor GATA-3 isoform X5 [Sinocyclocheilus grahami]	-	-	-	-
Unigene0000464	2.333333333	2.666666667	0.1152	0.2803	0	0.0979	0.0536	0.2519	0.131833333	0.134466667	0.028533389	1	1	no	-	--	-	-	-	-
Unigene0000465	12.33333333	7.666666667	0.5222	0.6537	1.6239	0.6343	0.486	0.3916	0.933266667	0.503966667	-0.888961054	0.23969168	1	no	-	--	-	-	-	-
Unigene0000466	22.33333333	27.33333333	0.4562	1.1233	0.1947	0.6844	0.8989	0.3756	0.5914	0.652966667	0.142875102	0.866534677	1	no	-	--	-	-	-	-
Unigene0000467	10.66666667	10.33333333	0.6733	0.437	1.3183	0.5725	0.7658	0.72	0.809533333	0.6861	-0.23867162	0.795812001	1	no	-	--	-	-	-	-
Unigene0000468	7.666666667	8.333333333	0.779	0.1083	0.4037	0.3311	0.3107	0.5842	0.430333333	0.408666667	-0.074530022	0.942146848	1	no	-	--	-	-	-	-
Unigene0000469	801	1033.666667	23.6592	24.328	18.5783	33.3533	24.0523	18.2277	22.1885	25.2111	0.184246926	0.659114978	1	no	Zcchc10	PREDICTED: zinc finger CCHC domain-containing protein 10-like [Sinocyclocheilus anshuiensis]	-	-	GO:0005488//binding;GO:0046914//transition metal ion binding;GO:0043167//ion binding;GO:0046872//metal ion binding;GO:0043169//cation binding	-
Unigene0000470	13	12.66666667	1.4592	0.4972	0.9075	1.1166	0.8826	0.4469	0.954633333	0.815366667	-0.227497734	0.793060868	1	no	-	--	-	-	-	-
Unigene0000471	1174	1340	22.0521	23.9453	19.9292	24.0289	23.0092	19.425	21.97553333	22.15436667	0.011692906	0.97668179	1	no	naa20	N-alpha-acetyltransferase 20 [Esox lucius]	-	GO:0044424//intracellular part;GO:0043229//intracellular organelle;GO:0005623//cell;GO:0005622//intracellular;GO:0044464//cell part;GO:0043226//organelle;GO:0043231//intracellular membrane-bounded organelle;GO:0043227//membrane-bounded organelle	GO:0016410//N-acyltransferase activity;GO:0016407//acetyltransferase activity;GO:0016746//transferase activity, transferring acyl groups;GO:0016747//transferase activity, transferring acyl groups other than amino-acyl groups;GO:0034212//peptide N-acetyltransferase activity;GO:0003824//catalytic activity;GO:0016740//transferase activity;GO:0008080//N-acetyltransferase activity	-
Unigene0000472	24.66666667	28.66666667	2.1087	0.6569	3.5844	1.4343	0.6279	4.2803	2.116666667	2.114166667	-0.001704978	1	1	no	-	--	-	-	-	-
Unigene0000473	14.66666667	3.333333333	0.8613	1.118	1.1903	0.4272	0	0.1884	1.056533333	0.2052	-2.364235649	0.00755154	0.920301799	no	-	--	-	-	-	-
Unigene0000474	12.33333333	22	0.3436	0.3649	0.4532	0.6373	0.5231	0.6558	0.387233333	0.6054	0.644685529	0.319668955	1	no	-	PREDICTED: inositol hexakisphosphate and diphosphoinositol-pentakisphosphate kinase 1-like isoform X3 [Cyprinus carpio]	ko04070//Phosphatidylinositol signaling system//Signal transduction//Environmental Information Processing	-	-	-
Unigene0000475	11.33333333	10.33333333	0.4738	0.369	0.7857	0.4431	0.4409	0.4145	0.542833333	0.432833333	-0.326697706	0.693144848	1	no	-	--	-	-	-	-
Unigene0000476	117.6666667	234.6666667	0.8755	0.6486	0.4166	0.5618	1.7933	1.1273	0.6469	1.1608	0.843504807	0.119188641	1	no	AIM1	PREDICTED: serine-rich adhesin for platelets-like [Sinocyclocheilus anshuiensis]	-	-	-	-
Unigene0000477	177	177.6666667	3.7924	4.191	2.8896	3.7647	3.6434	2.2599	3.624333333	3.222666667	-0.169460675	0.721986912	1	no	-	Zgc:162945 protein [Danio rerio]	-	-	-	-
Unigene0000478	84	98.66666667	1.1421	1.3674	1.3918	1.391	1.3357	1.3099	1.300433333	1.345533333	0.04918569	0.920228982	1	no	-	--	-	-	-	-
Unigene0000479	7	8.666666667	0.8828	0.1983	0.3519	0.4042	0.0632	1.0695	0.477666667	0.5123	0.100984688	0.947944834	1	no	-	PREDICTED: transcription factor E2-alpha-like isoform X5 [Sinocyclocheilus grahami]	-	-	-	-
Unigene0000480	32	32	0.7485	0.6726	1.3726	0.465	1.1251	0.8816	0.931233333	0.8239	-0.176673458	0.784627718	1	no	-	--	-	-	-	-
Unigene0000481	7.333333333	5.666666667	0.3668	0.7857	0.4563	0.3119	0.2048	0.5777	0.536266667	0.3648	-0.555844851	0.577582799	1	no	-	--	-	-	-	-
Unigene0000482	369.3333333	416.3333333	2.902	2.8252	2.254	2.2347	3.538	2.2429	2.6604	2.671866667	0.006204839	0.991016906	1	no	TRIM35	PREDICTED: zinc-binding protein A33-like [Sinocyclocheilus rhinocerous]	-	-	-	-
Unigene0000483	196.6666667	166.6666667	3.4427	2.4888	4.2042	2.5938	1.9031	2.9972	3.378566667	2.498033333	-0.435618595	0.355229189	1	no	MYH6	PREDICTED: LOW QUALITY PROTEIN: myosin-7-like [Cyprinus carpio]	ko04530//Tight junction//Cellular commiunity//Cellular Processes	GO:0044464//cell part;GO:0044424//intracellular part;GO:0043228//non-membrane-bounded organelle;GO:0005856//cytoskeleton;GO:0043232//intracellular non-membrane-bounded organelle;GO:0043229//intracellular organelle;GO:0005622//intracellular;GO:0005623//cell;GO:0043226//organelle;GO:0015629//actin cytoskeleton	GO:0005488//binding;GO:0097159//organic cyclic compound binding;GO:0016787//hydrolase activity;GO:1901363//heterocyclic compound binding;GO:0097367//carbohydrate derivative binding;GO:0032549//ribonucleoside binding;GO:0016817//hydrolase activity, acting on acid anhydrides;GO:0005515//protein binding;GO:0003824//catalytic activity;GO:0036094//small molecule binding;GO:0032550//purine ribonucleosi…	GO:0048646//anatomical structure formation involved in morphogenesis;GO:0044763//single-organism cellular process;GO:0071840//cellular component organization or biogenesis;GO:0006936//muscle contraction;GO:0009653//anatomical structure morphogenesis;GO:0003012//muscle system process;GO:0022607//cellular component assembly;GO:0050879//multicellular organismal movement;GO:0044707//single-multicellu…
Unigene0000484	8.333333333	9	0.8943	0.6028	0.2139	0.4094	0.7682	0.4815	0.570333333	0.553033333	-0.044438914	1	1	no	-	--	-	-	-	-
Unigene0000485	0	0	0	0	0	0	0	0	0.001	0.001	0	notest	notest	notest	-	--	-	-	-	-
Unigene0000486	2683.666667	3401.333333	46.9586	49.8557	43.6509	55.7177	55.7275	45.8267	46.82173333	52.42396667	0.163048176	0.658040338	1	no	Haus7	PREDICTED: HAUS augmin-like complex subunit 7 [Sinocyclocheilus rhinocerous]	-	-	-	-
Unigene0000487	318	366.6666667	19.4098	22.1881	18.171	24.8073	21.0912	14.9005	19.92296667	20.26633333	0.024652604	0.956761863	1	no	-	--	-	-	-	-
Unigene0000488	198.6666667	110.3333333	2.7808	9.1043	1.2784	2.1355	2.0033	2.4134	4.387833333	2.184066667	-1.006491834	0.114192391	1	no	RGS16	PREDICTED: regulator of G-protein signaling 16-like [Cyprinus carpio]	-	-	-	GO:0065007//biological regulation;GO:0009966//regulation of signal transduction;GO:0045744//negative regulation of G-protein coupled receptor protein signaling pathway;GO:0010646//regulation of cell communication;GO:0048523//negative regulation of cellular process;GO:0009968//negative regulation of signal transduction;GO:0010648//negative regulation of cell communication;GO:0048583//regulation of…
Unigene0000489	693.3333333	994.3333333	10.0043	6.2856	4.4854	7.5627	13.4386	5.6663	6.9251	8.8892	0.360218683	0.447398841	1	no	galc	PREDICTED: galactocerebrosidase-like [Sinocyclocheilus grahami]	ko01100//Metabolic pathways//Global and Overview//Metabolism;ko04142//Lysosome//Transport and catabolism//Cellular Processes;ko00600//Sphingolipid metabolism//Lipid metabolism//Metabolism	GO:0044444//cytoplasmic part;GO:0005737//cytoplasm;GO:0044464//cell part;GO:0000323//lytic vacuole;GO:0044424//intracellular part;GO:0043226//organelle;GO:0005773//vacuole;GO:0043227//membrane-bounded organelle;GO:0005622//intracellular;GO:0043229//intracellular organelle;GO:0043231//intracellular membrane-bounded organelle;GO:0005623//cell	GO:0003824//catalytic activity;GO:0016787//hydrolase activity;GO:0016798//hydrolase activity, acting on glycosyl bonds;GO:0004553//hydrolase activity, hydrolyzing O-glycosyl compounds	GO:0006687//glycosphingolipid metabolic process;GO:0008152//metabolic process;GO:0006643//membrane lipid metabolic process;GO:1901564//organonitrogen compound metabolic process;GO:0044238//primary metabolic process;GO:0006665//sphingolipid metabolic process;GO:0019374//galactolipid metabolic process;GO:0044255//cellular lipid metabolic process;GO:0044237//cellular metabolic process;GO:1903509//li…
Unigene0000490	9.333333333	8	1.0796	0.4204	0.5222	0.6731	0.5358	0.3148	0.674066667	0.5079	-0.40834681	0.60312639	1	no	-	--	-	-	-	-
Unigene0000491	101.3333333	148	2.1578	2.2866	1.3458	2.5652	3.1273	1.8378	1.930066667	2.5101	0.37909416	0.44411577	1	no	Kazald1	PREDICTED: kazal-type serine protease inhibitor domain-containing protein 1 [Sinocyclocheilus anshuiensis]	-	-	-	GO:0040007//growth;GO:0016049//cell growth;GO:0044763//single-organism cellular process;GO:0009987//cellular process;GO:0044699//single-organism process
Unigene0000492	8.666666667	14.33333333	0.5326	0.2828	0.4517	0.741	0.7209	0.3813	0.422366667	0.6144	0.540682235	0.491513371	1	no	-	hypothetical protein cypCar_00035167 [Cyprinus carpio]	-	-	-	-
Unigene0000493	7.666666667	5.333333333	0.2766	1.2791	0	0.1176	0.6435	0.242	0.518566667	0.334366667	-0.633098442	0.596902343	1	no	-	--	-	-	-	-
Unigene0000494	60.66666667	45.33333333	1.3359	1.1497	1.0435	0.8395	0.5044	0.9655	1.176366667	0.7698	-0.611782234	0.261017152	1	no	tc1a	transposase [Acipenser fulvescens]	-	-	-	-
Unigene0000495	93	114	2.7688	1.0911	0.7345	1.9057	1.4569	1.6006	1.531466667	1.6544	0.111394125	0.848960855	1	no	-	gag-like protein [Danio rerio]	ko01100//Metabolic pathways//Global and Overview//Metabolism;ko01110//Biosynthesis of secondary metabolites//Global and Overview//Metabolism;ko01130//Biosynthesis of antibiotics//Global and Overview//Metabolism;ko00480//Glutathione metabolism//Metabolism of other amino acids//Metabolism;ko00330//Arginine and proline metabolism//Amino acid metabolism//Metabolism	-	-	-
Unigene0000496	12	6	0.4252	1.1828	0.5667	0.2582	0.4522	0.2657	0.7249	0.325366667	-1.155715532	0.149153172	1	no	NLRC3	PREDICTED: NACHT, LRR and PYD domains-containing protein 12-like, partial [Sinocyclocheilus grahami]	ko04621//NOD-like receptor signaling pathway//Immune system//Organismal Systems	-	-	-
Unigene0000497	900.6666667	1286.666667	2.855	3.0277	3.8748	5.3433	3.7494	3.1043	3.2525	4.065666667	0.32194288	0.433878777	1	no	ptprf	PREDICTED: receptor-type tyrosine-protein phosphatase F-like isoform X2 [Sinocyclocheilus rhinocerous]	ko04514//Cell adhesion molecules (CAMs)//Signaling molecules and interaction//Environmental Information Processing;ko04910//Insulin signaling pathway//Endocrine system//Organismal Systems;ko04520//Adherens junction//Cellular commiunity//Cellular Processes	-	-	-
Unigene0000498	7.333333333	6.666666667	0.5608	0.042	0.3577	0.0733	0.5619	0.151	0.320166667	0.262066667	-0.28888925	0.788001161	1	no	ARL3	PREDICTED: ADP-ribosylation factor-like protein 3 [Poecilia formosa]	-	GO:0044464//cell part;GO:0005623//cell	GO:0032549//ribonucleoside binding;GO:0097159//organic cyclic compound binding;GO:0005488//binding;GO:0032550//purine ribonucleoside binding;GO:0001883//purine nucleoside binding;GO:0097367//carbohydrate derivative binding;GO:1901363//heterocyclic compound binding;GO:0036094//small molecule binding;GO:0001882//nucleoside binding	GO:0023052//signaling;GO:0007154//cell communication;GO:0048638//regulation of developmental growth;GO:0045664//regulation of neuron differentiation;GO:0044700//single organism signaling;GO:0022604//regulation of cell morphogenesis;GO:0007165//signal transduction;GO:0022603//regulation of anatomical structure morphogenesis;GO:0044767//single-organism developmental process;GO:0065008//regulation o…
Unigene0000499	9.666666667	6	1.0825	0.6323	0.374	0.1841	0.6044	0.3788	0.696266667	0.3891	-0.839498977	0.314853194	1	no	-	--	-	-	-	-
Unigene0000500	13.33333333	4.666666667	0.2012	1.3708	1.1119	0	0.4368	0.4107	0.894633333	0.2825	-1.663045645	0.096967437	1	no	-	--	-	-	-	-
Unigene0000501	6.666666667	10.66666667	1.0569	0.1816	0	0.3172	1.0992	0.3808	0.412833333	0.599066667	0.537157098	0.628740759	1	no	-	--	-	-	-	-
Unigene0000502	7.666666667	9.333333333	0.9256	0.4852	0.2214	0.908	0.3975	0.436	0.544066667	0.5805	0.093512626	0.942048545	1	no	-	--	-	-	-	-
Unigene0000503	15.66666667	20.66666667	1.0028	1.206	0.5502	0.8024	1.4271	1.0322	0.919666667	1.087233333	0.241478637	0.736416983	1	no	-	--	-	-	-	-
Unigene0000504	3.666666667	2	0.1154	0.5056	0	0.1962	0.0537	0.0505	0.207	0.100133333	-1.047708456	0.595294534	1	no	-	--	-	-	-	-
Unigene0000505	7	0.333333333	0.9091	0.236	0.1256	0	0	0.053	0.423566667	0.017666667	-4.583487294	0.006337048	0.865400285	no	-	--	-	-	-	-
Unigene0000506	651.3333333	713.3333333	13.6751	22.6056	18.2815	16.6336	21.6068	14.8216	18.1874	17.68733333	-0.040222762	0.924730515	1	no	fam213b	PREDICTED: prostamide/prostaglandin F synthase [Sinocyclocheilus anshuiensis]	ko01100//Metabolic pathways//Global and Overview//Metabolism;ko00590//Arachidonic acid metabolism//Lipid metabolism//Metabolism	GO:0044444//cytoplasmic part;GO:0044424//intracellular part;GO:0005737//cytoplasm;GO:0005623//cell;GO:0005622//intracellular;GO:0044464//cell part	GO:0003824//catalytic activity;GO:0016491//oxidoreductase activity;GO:0016614//oxidoreductase activity, acting on CH-OH group of donors	GO:0006631//fatty acid metabolic process;GO:0044237//cellular metabolic process;GO:0006629//lipid metabolic process;GO:0071704//organic substance metabolic process;GO:0009987//cellular process;GO:0044238//primary metabolic process;GO:0044710//single-organism metabolic process;GO:0006690//icosanoid metabolic process;GO:0043436//oxoacid metabolic process;GO:0032787//monocarboxylic acid metabolic pr…
Unigene0000507	590	704.6666667	10.4746	12.0821	9.4691	11.1976	12.188	10.4783	10.67526667	11.28796667	0.080513524	0.842142805	1	no	RNF25	PREDICTED: E3 ubiquitin-protein ligase RNF25-like isoform X1 [Sinocyclocheilus rhinocerous]	-	-	GO:0043167//ion binding;GO:0043169//cation binding;GO:0005488//binding	-
Unigene0000508	6348	8276.333333	37.5751	40.5325	42.4917	52.6301	43.4464	42.1092	40.19976667	46.0619	0.196386794	0.584089452	1	no	ncapg2	PREDICTED: condensin-2 complex subunit G2 [Cyprinus carpio]	-	-	-	-
Unigene0000509	31	11	0.9215	1.5338	0.2773	0.3791	0.4426	0.052	0.910866667	0.291233333	-1.645064397	0.044443819	1	no	-	--	-	-	-	-
Unigene0000510	206.3333333	216.6666667	3.4106	1.946	2.4084	2.2306	3.1039	1.891	2.588333333	2.4085	-0.1038885	0.826380233	1	no	c1galt1a	PREDICTED: glycoprotein-N-acetylgalactosamine 3-beta-galactosyltransferase 1-A-like [Sinocyclocheilus rhinocerous]	ko01100//Metabolic pathways//Global and Overview//Metabolism;ko00512//Mucin type O-glycan biosynthesis//Glycan biosynthesis and metabolism//Metabolism	GO:0016020//membrane;GO:0031224//intrinsic component of membrane;GO:0044425//membrane part	GO:0048531//beta-1,3-galactosyltransferase activity;GO:0016758//transferase activity, transferring hexosyl groups;GO:0043167//ion binding;GO:0016740//transferase activity;GO:0008378//galactosyltransferase activity;GO:0003824//catalytic activity;GO:0043169//cation binding;GO:0005488//binding;GO:0016757//transferase activity, transferring glycosyl groups	GO:0044767//single-organism developmental process;GO:0044763//single-organism cellular process;GO:0006493//protein O-linked glycosylation;GO:0006464//cellular protein modification process;GO:0009059//macromolecule biosynthetic process;GO:0044237//cellular metabolic process;GO:0071704//organic substance metabolic process;GO:0008152//metabolic process;GO:0019538//protein metabolic process;GO:000910…
Unigene0000511	6.666666667	7.666666667	0.1331	0.3023	0.4598	0.3395	0.5367	0.0388	0.2984	0.305	0.031561707	1	1	no	-	--	-	-	-	-
Unigene0000512	1833	1991.666667	21.0179	17.9895	30.3687	21.4971	14.9478	29.2256	23.12536667	21.89016667	-0.079193302	0.850184632	1	no	fbxo43	PREDICTED: F-box only protein 43-like [Sinocyclocheilus rhinocerous]	ko04114//Oocyte meiosis//Cell growth and death//Cellular Processes	-	-	-
Unigene0000513	3.333333333	5.666666667	0.2323	0.1696	0.1806	0.0988	0.4864	0.3049	0.194166667	0.2967	0.611709378	0.634662735	1	no	-	--	-	-	-	-
Unigene0000514	10.66666667	5.666666667	0.5837	0.4262	1.3612	0.6203	0	0.4469	0.790366667	0.355733333	-1.151725937	0.274021735	1	no	-	--	-	-	-	-
Unigene0000515	78.33333333	51.33333333	4.4831	4.8346	7.0058	3.2839	1.7329	4.2845	5.441166667	3.100433333	-0.811446151	0.140947384	1	no	-	--	-	-	-	-
Unigene0000516	42.33333333	51	2.433	3.5868	2.81	2.0686	3.299	4.075	2.943266667	3.147533333	0.096803397	0.878673156	1	no	-	--	-	-	-	-
Unigene0000517	10	14.33333333	0.4075	0.2645	1.4078	0.8083	1.2639	0.5348	0.693266667	0.869	0.325945782	0.683262661	1	no	-	--	-	-	-	-
Unigene0000518	1941	2471.333333	18.3946	21.4827	11.7213	18.4817	23.909	16.1717	17.19953333	19.5208	0.182642757	0.650123881	1	no	Spg7	PREDICTED: paraplegin-like isoform X3 [Sinocyclocheilus anshuiensis]	-	GO:0044425//membrane part;GO:0031224//intrinsic component of membrane;GO:0016020//membrane	GO:0032549//ribonucleoside binding;GO:0008233//peptidase activity;GO:0097367//carbohydrate derivative binding;GO:0036094//small molecule binding;GO:0001883//purine nucleoside binding;GO:0046914//transition metal ion binding;GO:0001882//nucleoside binding;GO:0097159//organic cyclic compound binding;GO:0003824//catalytic activity;GO:0043169//cation binding;GO:0043167//ion binding;GO:0004175//endope…	GO:0051604//protein maturation;GO:0016485//protein processing;GO:0019538//protein metabolic process;GO:0006508//proteolysis;GO:0008152//metabolic process;GO:0044238//primary metabolic process;GO:0043170//macromolecule metabolic process;GO:0071704//organic substance metabolic process;GO:0010467//gene expression
Unigene0000519	573.6666667	347	15.24	89.0213	21.3935	35.3498	20.0329	12.1688	41.88493333	22.51716667	-0.895406073	0.158380874	1	no	S100A4	PREDICTED: ictacalcin-like isoform X1 [Sinocyclocheilus anshuiensis]	-	-	GO:0005488//binding;GO:0046872//metal ion binding;GO:0043167//ion binding;GO:0043169//cation binding	-
Unigene0000520	14.33333333	23	0.5647	1.2095	0.6438	2.2086	0.6831	0.4941	0.806	1.1286	0.485682511	0.53663213	1	no	-	--	-	-	-	-
Unigene0000521	23.66666667	15	1.856	0.3907	1.3518	0.3838	0.8402	0.79	1.1995	0.671333333	-0.837331975	0.258565437	1	no	-	--	-	-	-	-
Unigene0000522	47.33333333	32	2.6557	6.0094	1.4135	2.1969	2.204	1.6955	3.359533333	2.032133333	-0.725265781	0.254059671	1	no	-	--	-	-	-	-
Unigene0000523	166.3333333	53.33333333	1.0354	0.3931	3.8633	0.5106	0.6455	0.3171	1.763933333	0.491066667	-1.844805235	0.011071926	1	no	-	--	-	-	-	-
Unigene0000524	34.66666667	46.33333333	1.6035	2.4762	1.662	2.5386	3.0356	1.2578	1.9139	2.277333333	0.250830022	0.674119948	1	no	-	--	-	-	-	-
Unigene0000525	773.3333333	899.6666667	10.7074	8.9767	5.0667	6.6027	14.2039	5.1099	8.250266667	8.638833333	0.06639574	0.892868488	1	no	MSI1	PREDICTED: RNA-binding protein Musashi homolog 1-like [Danio rerio]	ko03015//mRNA surveillance pathway//Translation//Genetic Information Processing	-	GO:0005488//binding;GO:0097159//organic cyclic compound binding	GO:0007275//multicellular organism development;GO:0044699//single-organism process;GO:0048731//system development;GO:0032502//developmental process;GO:0007399//nervous system development;GO:0032501//multicellular organismal process;GO:0048856//anatomical structure development;GO:0044707//single-multicellular organism process;GO:0044767//single-organism developmental process
Unigene0000526	8.333333333	9.666666667	0.9544	1.1615	0.8656	0.9129	0.8881	1.2526	0.993833333	1.017866667	0.034472755	1	1	no	-	--	-	-	-	-
Unigene0000527	3027.333333	3056.333333	92.5344	100.2483	104.3955	93.7888	76.9405	92.8042	99.0594	87.8445	-0.173341922	0.637562738	1	no	DYNLRB1	PREDICTED: dynein light chain roadblock-type 1 isoform X1 [Sinocyclocheilus anshuiensis]	-	GO:0015630//microtubule cytoskeleton;GO:0043228//non-membrane-bounded organelle;GO:0005622//intracellular;GO:0044464//cell part;GO:0044424//intracellular part;GO:0043232//intracellular non-membrane-bounded organelle;GO:0005623//cell;GO:0044446//intracellular organelle part;GO:0044430//cytoskeletal part;GO:0044422//organelle part;GO:0005856//cytoskeleton;GO:0043226//organelle;GO:0005875//microtubu…	-	GO:0009987//cellular process;GO:0044699//single-organism process;GO:0023052//signaling;GO:0007154//cell communication;GO:0050789//regulation of biological process;GO:0044763//single-organism cellular process;GO:0007167//enzyme linked receptor protein signaling pathway;GO:0051716//cellular response to stimulus;GO:0007165//signal transduction;GO:0065007//biological regulation;GO:0050896//response t…
Unigene0000528	244.6666667	298.6666667	2.3302	3.3294	2.2475	2.4582	3.8348	2.322	2.6357	2.871666667	0.123702126	0.785244052	1	no	tbx1	PREDICTED: T-box transcription factor TBX1 isoform X1 [Sinocyclocheilus anshuiensis]	-	GO:0043231//intracellular membrane-bounded organelle;GO:0005622//intracellular;GO:0005623//cell;GO:0043229//intracellular organelle;GO:0044424//intracellular part;GO:0044464//cell part;GO:0043226//organelle;GO:0043227//membrane-bounded organelle	GO:0005488//binding;GO:0003677//DNA binding;GO:0003676//nucleic acid binding;GO:0001071//nucleic acid binding transcription factor activity;GO:0005515//protein binding;GO:1901363//heterocyclic compound binding;GO:0097159//organic cyclic compound binding;GO:0046983//protein dimerization activity	GO:0003143//embryonic heart tube morphogenesis;GO:0009653//anatomical structure morphogenesis;GO:0044260//cellular macromolecule metabolic process;GO:0016070//RNA metabolic process;GO:0008152//metabolic process;GO:0006139//nucleobase-containing compound metabolic process;GO:0034641//cellular nitrogen compound metabolic process;GO:0043170//macromolecule metabolic process;GO:0071704//organic substa…
Unigene0000529	12.33333333	5.333333333	0.8007	0.4197	1.0853	0.4189	0.1719	0.2694	0.768566667	0.286733333	-1.422460776	0.078277915	1	no	-	--	-	-	-	-
Unigene0000530	3	5.666666667	0.3668	0	0.3042	0.4366	0.5462	0.1284	0.223666667	0.3704	0.727733833	0.590964767	1	no	-	--	-	-	-	-
Unigene0000531	502.6666667	336	36.6664	11.7909	53.4539	21.2735	7.245	29.9845	33.9704	19.501	-0.8007301	0.183026483	1	no	-	--	-	-	-	-
Unigene0000532	8848	9162.333333	31.0879	50.7432	20.8011	23.6694	43.8198	28.0133	34.21073333	31.83416667	-0.103873031	0.809452931	1	no	EEF2	PREDICTED: elongation factor 2 [Sinocyclocheilus anshuiensis]	-	-	-	-
Unigene0000533	1252	1195	8.3317	2.3028	13.0821	5.2944	2.4842	11.6895	7.905533333	6.489366667	-0.28478511	0.647960528	1	no	Prss56	PREDICTED: serine protease 56 [Pygocentrus nattereri]	-	-	-	-
Unigene0000534	4831	4609.333333	41.9695	51.5093	55.0928	49.1614	39.7575	35.6033	49.52386667	41.5074	-0.254755395	0.489730927	1	no	ZNF706	PREDICTED: zinc finger protein 706 isoform X1 [Sinocyclocheilus rhinocerous]	-	-	-	-
Unigene0000535	38.33333333	27.66666667	2.221	1.2433	2.9926	1.6051	1.3433	1.1173	2.1523	1.355233333	-0.667337918	0.267018728	1	no	-	--	-	-	-	-
Unigene0000536	343	422.3333333	3.013	4.1949	3.647	5.4907	4.0781	2.1937	3.6183	3.920833333	0.115848288	0.803046251	1	no	CRISPLD1	PREDICTED: cysteine-rich secretory protein LCCL domain-containing 1-like [Sinocyclocheilus anshuiensis]	-	-	-	-
Unigene0000537	60	45	2.0512	3.8765	5.0025	2.5647	3.0315	1.6363	3.6434	2.410833333	-0.595753476	0.296442178	1	no	-	--	-	-	-	-
Unigene0000538	2	1.666666667	0	0.0996	0.212	0	0.1427	0.0895	0.103866667	0.0774	-0.424327261	1	1	no	-	--	-	-	-	-
Unigene0000539	14.66666667	16	0.3311	1.105	0.6373	0.4825	1.2323	0.331	0.691133333	0.681933333	-0.019333356	1	1	no	-	--	-	-	-	-
Unigene0000540	5	3	0.7178	0.3494	0	0.122	0.1336	0.314	0.355733333	0.189866667	-0.90580952	0.445093635	1	no	-	--	-	-	-	-
Unigene0000541	695	513	11.4247	4.6036	8.1209	4.9301	3.5972	7.0363	8.049733333	5.187866667	-0.63379959	0.178166703	1	no	ZNF271	PREDICTED: zinc finger protein 239-like isoform X1 [Sinocyclocheilus grahami]	-	-	-	-
Unigene0000542	953.3333333	1165	3.0017	2.9883	2.4395	3.038	3.3524	2.7294	2.809833333	3.039933333	0.113555126	0.772129851	1	no	aasdh	PREDICTED: acyl-CoA synthetase family member 4 isoform X1 [Sinocyclocheilus anshuiensis]	-	-	GO:0097159//organic cyclic compound binding;GO:0032550//purine ribonucleoside binding;GO:0001882//nucleoside binding;GO:1901363//heterocyclic compound binding;GO:0097367//carbohydrate derivative binding;GO:0036094//small molecule binding;GO:0001883//purine nucleoside binding;GO:0032549//ribonucleoside binding;GO:0016877//ligase activity, forming carbon-sulfur bonds;GO:0016874//ligase activity;GO:…	GO:0044281//small molecule metabolic process;GO:0032787//monocarboxylic acid metabolic process;GO:0044699//single-organism process;GO:0044710//single-organism metabolic process;GO:0044238//primary metabolic process;GO:0044763//single-organism cellular process;GO:0006082//organic acid metabolic process;GO:0071704//organic substance metabolic process;GO:0044237//cellular metabolic process;GO:000998…
Unigene0000543	37	32	1.0139	1.0768	1.3375	1.3062	0.486	0.7796	1.142733333	0.857266667	-0.414672825	0.498275274	1	no	-	PREDICTED: uncharacterized protein LOC107715642 [Sinocyclocheilus rhinocerous]	-	-	-	-
Unigene0000544	15	15.66666667	1.3787	0.7771	1.1281	0.6169	1.4855	0.9523	1.094633333	1.018233333	-0.104379495	0.924188879	1	no	-	--	-	-	-	-
Unigene0000545	5	4.666666667	0.0649	0.2528	0.6728	0.4415	0.1208	0.2272	0.330166667	0.263166667	-0.327217709	0.841282664	1	no	-	--	-	-	-	-
Unigene0000546	11	17.33333333	0.2	0.9737	0.1244	0.5102	1.0796	0.28	0.4327	0.623266667	0.526482436	0.570682984	1	no	-	--	-	-	-	-
Unigene0000547	615	469.6666667	11.9557	5.1569	10.7323	6.7555	3.3139	8.3788	9.281633333	6.1494	-0.593933053	0.224147768	1	no	-	PREDICTED: dynein light chain 1, cytoplasmic-like [Cyprinus carpio]	-	-	-	-
Unigene0000548	3.333333333	3	0.6649	0.2158	0.2297	0.4711	0	0.3878	0.370133333	0.2863	-0.370517397	0.78360534	1	no	-	--	-	-	-	-
Unigene0000549	21.33333333	18	2.3345	0.627	2.2528	1.6427	1.0487	1.1269	1.7381	1.272766667	-0.449543131	0.509660919	1	no	-	--	-	-	-	-
Unigene0000550	856.6666667	1099.333333	4.4912	4.4966	4.7157	4.9031	5.7471	4.8875	4.567833333	5.179233333	0.181228544	0.641454031	1	no	PLEKHM3	PREDICTED: pleckstrin homology domain-containing family M member 3-like isoform X1 [Sinocyclocheilus rhinocerous]	-	-	-	-
Unigene0000551	59.66666667	106.6666667	4.221	2.095	8.7501	3.5185	4.852	14.9897	5.022033333	7.786733333	0.632746616	0.350321626	1	no	-	--	-	-	-	-
Unigene0000552	1392.333333	1381.666667	7.8583	6.1298	11.7431	8.3775	5.1493	8.6637	8.577066667	7.396833333	-0.213576565	0.615758525	1	no	AP3B2	PREDICTED: AP-3 complex subunit beta-2 isoform X4 [Sinocyclocheilus rhinocerous]	ko04142//Lysosome//Transport and catabolism//Cellular Processes	GO:0044464//cell part;GO:0030117//membrane coat;GO:0048475//coated membrane;GO:0044425//membrane part;GO:0032991//macromolecular complex;GO:0005623//cell;GO:0044444//cytoplasmic part;GO:0044424//intracellular part;GO:0030119//AP-type membrane coat adaptor complex;GO:0043234//protein complex;GO:0005622//intracellular;GO:0016020//membrane;GO:0005737//cytoplasm;GO:0098796//membrane protein complex	-	GO:0051179//localization;GO:0006810//transport;GO:0051234//establishment of localization
Unigene0000553	6.333333333	4.666666667	1.2341	0.0924	0.492	0.0807	0.9717	0.1661	0.606166667	0.406166667	-0.577642675	0.699939223	1	no	-	PREDICTED: uncharacterized protein LOC109112128 [Cyprinus carpio]	-	-	-	-
Unigene0000554	185.3333333	209.6666667	2.2617	1.7393	1.2805	0.9453	2.6971	1.7211	1.7605	1.787833333	0.022227024	0.969551533	1	no	pol	PREDICTED: olfactory receptor 52D1-like [Fundulus heteroclitus]	-	-	-	-
Unigene0000555	2518	2695.666667	20.5053	20.44	22.0108	19.1359	18.8646	21.3341	20.98536667	19.7782	-0.085472538	0.815657915	1	no	-	Uncharacterized protein C3orf30 [Cricetulus griseus]	-	-	-	-
Unigene0000556	12.33333333	11.66666667	1.9096	0.485	0.6884	0.8471	0.9271	0.7991	1.027666667	0.857766667	-0.260715231	0.781921241	1	no	-	PREDICTED: regucalcin isoform X1 [Oreochromis niloticus]	-	-	-	-
Unigene0000557	0	0	0	0	0	0	0	0	0.001	0.001	0	notest	notest	notest	-	--	-	-	-	-
Unigene0000558	123.6666667	97.66666667	5.0647	1.5075	5.5504	2.5782	0.9006	4.77	4.040866667	2.7496	-0.555442992	0.398693963	1	no	ccdc176	PREDICTED: basal body-orientation factor 1-like [Cyprinus carpio]	-	-	-	-
Unigene0000559	28.66666667	31	4.1926	2.1902	2.4377	2.1736	2.8547	3.3998	2.940166667	2.809366667	-0.065653007	0.910674787	1	no	-	PREDICTED: RNA-directed DNA polymerase from mobile element jockey-like, partial [Larimichthys crocea]	-	-	-	-
Unigene0000560	643.6666667	992	6.5472	7.3138	4.557	8.4352	8.1558	8.5381	6.139333333	8.376366667	0.448242593	0.270345349	1	no	AKAP17A	PREDICTED: A-kinase anchor protein 17A [Pygocentrus nattereri]	-	GO:0044424//intracellular part;GO:0005623//cell;GO:0044428//nuclear part;GO:0044446//intracellular organelle part;GO:0031974//membrane-enclosed lumen;GO:0016604//nuclear body;GO:0005654//nucleoplasm;GO:0044464//cell part;GO:0005634//nucleus;GO:0070013//intracellular organelle lumen;GO:0043233//organelle lumen;GO:0005622//intracellular;GO:0043231//intracellular membrane-bounded organelle;GO:004445…	GO:0005515//protein binding;GO:0097159//organic cyclic compound binding;GO:0005488//binding	GO:0010467//gene expression;GO:0006396//RNA processing;GO:0006807//nitrogen compound metabolic process;GO:0044238//primary metabolic process;GO:0006139//nucleobase-containing compound metabolic process;GO:0044260//cellular macromolecule metabolic process;GO:0034641//cellular nitrogen compound metabolic process;GO:0090304//nucleic acid metabolic process;GO:1901360//organic cyclic compound metaboli…
Unigene0000561	60.66666667	75.66666667	0.8052	0.7412	1.1381	0.6597	0.9809	1.3066	0.894833333	0.9824	0.134691562	0.808088987	1	no	nkd2l	PREDICTED: protein naked cuticle homolog 2-like [Sinocyclocheilus anshuiensis]	ko04310//Wnt signaling pathway//Signal transduction//Environmental Information Processing	GO:0044464//cell part;GO:0016020//membrane;GO:0005623//cell	-	GO:0032502//developmental process;GO:0050794//regulation of cellular process;GO:0009653//anatomical structure morphogenesis;GO:0009966//regulation of signal transduction;GO:0023051//regulation of signaling;GO:0048583//regulation of response to stimulus;GO:0023057//negative regulation of signaling;GO:0048856//anatomical structure development;GO:0065007//biological regulation;GO:0048646//anatomical…
Unigene0000562	2669.333333	2990.333333	69.5686	73.2015	51.0847	68.6877	74.3867	49.5675	64.61826667	64.21396667	-0.009054931	0.981567374	1	no	Ppif	PREDICTED: peptidyl-prolyl cis-trans isomerase A-like [Sinocyclocheilus grahami]	ko04020//Calcium signaling pathway//Signal transduction//Environmental Information Processing	-	GO:0016859//cis-trans isomerase activity;GO:0016853//isomerase activity;GO:0003824//catalytic activity	GO:0008152//metabolic process;GO:0044238//primary metabolic process;GO:0044267//cellular protein metabolic process;GO:0009987//cellular process;GO:0071704//organic substance metabolic process;GO:0043170//macromolecule metabolic process;GO:0019538//protein metabolic process;GO:0044237//cellular metabolic process;GO:0044260//cellular macromolecule metabolic process
Unigene0000563	21	20.33333333	0.725	0.5813	1.4146	0.4351	0.5556	1.306	0.906966667	0.765566667	-0.244521514	0.730706406	1	no	-	--	-	-	-	-
Unigene0000564	14	9.333333333	0.742	0.6113	1.0649	0.3397	0.4249	0.6492	0.806066667	0.471266667	-0.774355522	0.26978787	1	no	-	PREDICTED: neuron navigator 3-like [Poecilia mexicana]	-	-	-	-
Unigene0000565	24.33333333	23.66666667	0.6262	0.3811	0.9195	0.5324	0.3642	0.7306	0.642266667	0.5424	-0.243815245	0.719378831	1	no	-	--	-	-	-	-
Unigene0000566	13.66666667	15	1.7348	0.1126	0.5394	0.6392	0.1614	1.4673	0.7956	0.755966667	-0.073720654	0.971373968	1	no	-	--	-	-	-	-
Unigene0000567	77.33333333	86	3.2323	2.633	1.7777	2.608	2.9464	1.9912	2.547666667	2.5152	-0.018503407	0.981363619	1	no	-	--	-	-	-	-
Unigene0000568	276.6666667	219	1.1872	0.5619	2.2082	0.5506	0.7991	1.3795	1.3191	0.909733333	-0.536038318	0.338247589	1	no	CUX2	PREDICTED: homeobox protein cut-like 2 [Sinocyclocheilus anshuiensis]	-	-	-	-
Unigene0000569	986.6666667	1099	3.8064	3.8573	3.6027	2.6097	4.4115	4.1247	3.755466667	3.7153	-0.015513484	0.970237523	1	no	Apbb2	PREDICTED: amyloid beta A4 precursor protein-binding family B member 2-like isoform X4 [Sinocyclocheilus grahami]	-	-	-	-
Unigene0000570	1795.666667	2376.666667	30.9458	11.4099	47.6855	47.1916	7.9343	46.6619	30.01373333	33.92926667	0.176907465	0.775154288	1	no	PIM3	PREDICTED: serine/threonine-protein kinase 33-like [Cyprinus carpio]	-	-	-	-
Unigene0000571	37.66666667	38.66666667	2.2843	3.486	1.1518	2.362	3.5043	0.5402	2.307366667	2.1355	-0.111673385	0.88479074	1	no	-	PREDICTED: probable serine/threonine-protein kinase clkA [Sinocyclocheilus grahami]	-	-	-	-
Unigene0000572	14.66666667	18	0.9737	1.9907	1.312	1.8213	2.1746	0.6815	1.425466667	1.559133333	0.129310006	0.896078501	1	no	-	PREDICTED: probable serine/threonine-protein kinase clkA [Sinocyclocheilus grahami]	-	-	-	-
Unigene0000573	118	119	10.3825	4.5392	2.0426	3.5555	9.3482	2.5654	5.654766667	5.156366667	-0.133112639	0.844797965	1	no	-	PREDICTED: mucin-2-like [Sinocyclocheilus anshuiensis]	-	-	-	-
Unigene0000574	35.66666667	60.33333333	1.8918	2.4749	1.9608	2.865	5.8312	0.931	2.109166667	3.209066667	0.60548066	0.363353869	1	no	-	PREDICTED: mucin-2-like [Sinocyclocheilus anshuiensis]	-	-	-	-
Unigene0000575	51	85	1.2875	1.4026	2.0334	1.9026	4.3928	0.751	1.5745	2.3488	0.577030116	0.372955465	1	no	MUC5B	PREDICTED: mucin-2 [Danio rerio]	-	-	-	-
Unigene0000576	23.33333333	45	1.3467	0.9535	0.5499	1.4573	1.9747	1.4639	0.950033333	1.631966667	0.780561552	0.185300571	1	no	-	PREDICTED: transmembrane protein 182 isoform X1 [Hippocampus comes]	-	-	-	-
Unigene0000577	0	0	0	0	0	0	0	0	0.001	0.001	0	notest	notest	notest	-	--	-	-	-	-
Unigene0000578	33	23.33333333	2.194	1.8817	1.0829	0.9327	1.5555	0.777	1.719533333	1.0884	-0.659808221	0.274746562	1	no	-	--	-	-	-	-
Unigene0000579	0.333333333	0.333333333	0.1122	0	0	0	0.1044	0	0.0374	0.0348	-0.103950964	1	1	no	-	--	-	-	-	-
Unigene0000580	0	0	0	0	0	0	0	0	0.001	0.001	0	notest	notest	notest	-	--	-	-	-	-
Unigene0000581	48.33333333	72.33333333	0.7559	1.7444	1.567	2.2851	2.2926	0.8083	1.355766667	1.795333333	0.405142823	0.501759317	1	no	-	--	-	-	-	-
Unigene0000582	33	23.66666667	2.5187	2.3035	2.7688	2.3362	1.2074	1.202	2.530333333	1.581866667	-0.677699449	0.259189114	1	no	-	--	-	-	-	-
Unigene0000583	149	202	6.4408	12.2165	6.0427	9.0167	11.4184	9.4245	8.233333333	9.9532	0.273683797	0.571476207	1	no	-	--	-	-	-	-
Unigene0000584	6.333333333	10.66666667	0.3005	0.0836	0.4449	0.4015	0.3195	0.4882	0.276333333	0.403066667	0.544608877	0.554918526	1	no	-	--	-	-	-	-
Unigene0000585	7.666666667	2.666666667	0.6112	0.6942	1.0558	0.1732	0.0948	0.4456	0.787066667	0.237866667	-1.726332727	0.068019959	1	no	-	--	-	-	-	-
Unigene0000586	1340.333333	1637	13.7168	14.0239	9.6098	10.1522	23.5203	7.396	12.45016667	13.6895	0.136904699	0.77264345	1	no	PGR	PREDICTED: LOW QUALITY PROTEIN: progesterone receptor-like [Cyprinus carpio]	ko04114//Oocyte meiosis//Cell growth and death//Cellular Processes;ko04914//Progesterone-mediated oocyte maturation//Endocrine system//Organismal Systems	GO:0043226//organelle;GO:0043231//intracellular membrane-bounded organelle;GO:0005623//cell;GO:0005622//intracellular;GO:0044424//intracellular part;GO:0043229//intracellular organelle;GO:0043227//membrane-bounded organelle;GO:0044464//cell part	GO:0003677//DNA binding;GO:0060089//molecular transducer activity;GO:0001071//nucleic acid binding transcription factor activity;GO:0043167//ion binding;GO:0003676//nucleic acid binding;GO:1901363//heterocyclic compound binding;GO:0046914//transition metal ion binding;GO:0043169//cation binding;GO:0005488//binding;GO:0097159//organic cyclic compound binding;GO:0038023//signaling receptor activity…	GO:0023052//signaling;GO:0009725//response to hormone;GO:0071495//cellular response to endogenous stimulus;GO:0050896//response to stimulus;GO:0018130//heterocycle biosynthetic process;GO:0044238//primary metabolic process;GO:0006807//nitrogen compound metabolic process;GO:0007154//cell communication;GO:0007165//signal transduction;GO:1901576//organic substance biosynthetic process;GO:0042221//re…
Unigene0000587	641	712.3333333	52.7663	20.8259	58.4921	52.5424	15.9878	57.8718	44.0281	42.134	-0.063439702	0.908064519	1	no	-	--	-	-	-	-
Unigene0000588	41	41.33333333	1.2384	0.3836	1.8962	0.6461	0.8119	1.6253	1.172733333	1.027766667	-0.19036223	0.778604547	1	no	-	--	-	-	-	-
Unigene0000589	531.3333333	695	5.0435	5.6682	3.6977	5.3967	7.3472	4.0562	4.803133333	5.600033333	0.221459557	0.607520154	1	no	Znf319	PREDICTED: zinc finger protein 319-like [Danio rerio]	-	-	-	-
Unigene0000590	25	22.33333333	2.0501	0.917	1.206	0.8009	1.5983	0.9211	1.391033333	1.106766667	-0.329805893	0.624902348	1	no	-	--	-	-	-	-
Unigene0000591	17.66666667	17.66666667	0.7426	0.482	2.1166	1.4732	0.4031	0.9745	1.113733333	0.950266667	-0.228999514	0.79788631	1	no	-	--	-	-	-	-
Unigene0000592	1618.666667	1699.333333	14.5915	16.5273	18.1402	15.1038	13.9917	16.3737	16.41966667	15.1564	-0.115497719	0.75986437	1	no	spop	speckle-type POZ protein [Danio rerio]	-	GO:1902494//catalytic complex;GO:0005622//intracellular;GO:0043234//protein complex;GO:0005634//nucleus;GO:0043233//organelle lumen;GO:0043229//intracellular organelle;GO:0000151//ubiquitin ligase complex;GO:0070013//intracellular organelle lumen;GO:0044422//organelle part;GO:0044464//cell part;GO:0031974//membrane-enclosed lumen;GO:0043226//organelle;GO:0044446//intracellular organelle part;GO:0…	GO:0005515//protein binding;GO:0005488//binding;GO:0044389//ubiquitin-like protein ligase binding;GO:0019899//enzyme binding	GO:0036211//protein modification process;GO:0071704//organic substance metabolic process;GO:0048583//regulation of response to stimulus;GO:0033500//carbohydrate homeostasis;GO:0016567//protein ubiquitination;GO:0051603//proteolysis involved in cellular protein catabolic process;GO:0006464//cellular protein modification process;GO:0044248//cellular catabolic process;GO:0043067//regulation of progr…
Unigene0000593	78.33333333	67.66666667	5.4583	5.3743	3.7287	3.3751	4.5019	3.3104	4.853766667	3.729133333	-0.380264375	0.453032303	1	no	-	--	-	-	-	-
Unigene0000594	206	188.6666667	2.52	4.1371	3.5338	2.0306	4.8585	1.4987	3.396966667	2.795933333	-0.2809171	0.596221275	1	no	-	--	-	-	-	-
Unigene0000595	236.6666667	313.3333333	9.8482	7.3537	5.4176	7.777	6.406	12.1858	7.539833333	8.7896	0.221264879	0.639946503	1	no	-	--	-	-	-	-
Unigene0000596	14.33333333	19.33333333	1.4847	0.5129	0.0496	1.1809	0.8913	0.3771	0.6824	0.816433333	0.258717439	0.788605207	1	no	-	PREDICTED: polyglutamine-binding protein 1-like [Acanthisitta chloris]	-	-	-	-
Unigene0000597	26.33333333	34.33333333	1.4954	0.7279	0.8974	0.6692	1.831	1.1362	1.040233333	1.212133333	0.220641229	0.735858202	1	no	Tf2-9	PREDICTED: RNA-directed DNA polymerase homolog, partial [Danio rerio]	-	-	-	-
Unigene0000598	3343.666667	3286.666667	47.7351	29.0237	73.3716	38.2596	16.8567	72.351	50.04346667	42.4891	-0.236088948	0.648673809	1	no	dnaaf2	PREDICTED: protein kintoun isoform X2 [Sinocyclocheilus grahami]	-	-	-	-
Unigene0000599	32.66666667	16.66666667	2.9711	1.0744	4.3992	1.227	0.395	2.0796	2.8149	1.233866667	-1.189897168	0.109518481	1	no	-	PREDICTED: serine/arginine repetitive matrix protein 2-like isoform X1 [Hippocampus comes]	-	-	-	-
Unigene0000600	6.333333333	12.66666667	0.5133	0.7995	0.6384	1.0474	0.2866	2.0658	0.6504	1.133266667	0.801088216	0.358780181	1	no	-	--	-	-	-	-
Unigene0000601	63	36.66666667	7.1101	3.2014	6.6325	0.9068	4.3005	3.577	5.648	2.9281	-0.947775263	0.145052126	1	no	-	PREDICTED: protein NLRC5-like, partial [Sinocyclocheilus grahami]	-	-	-	-
Unigene0000602	88.66666667	96	1.2053	5.5275	1.6109	3.4249	1.948	2.6364	2.781233333	2.669766667	-0.059011127	0.93189777	1	no	-	PREDICTED: uncharacterized protein LOC107741621 [Sinocyclocheilus rhinocerous]	-	-	-	-
Unigene0000603	508.3333333	328.3333333	5.5266	6.2081	4.4614	2.241	3.1153	3.9241	5.3987	3.093466667	-0.803387562	0.06175896	1	no	-	PREDICTED: protein NLRC5-like, partial [Sinocyclocheilus grahami]	-	-	-	-
Unigene0000604	28	36	0.8464	0.3987	1.0754	0.9054	0.5844	1.0989	0.7735	0.8629	0.157792086	0.80034652	1	no	-	--	-	-	-	-
Unigene0000605	51.66666667	67	1.0926	0.9849	1.0695	1.2902	1.4121	0.9028	1.049	1.2017	0.1960621	0.712001081	1	no	MRAS	PREDICTED: ras-related protein M-Ras-like [Sinocyclocheilus anshuiensis]	ko04010//MAPK signaling pathway//Signal transduction//Environmental Information Processing;ko04810//Regulation of actin cytoskeleton//Cell motility//Cellular Processes;ko04530//Tight junction//Cellular commiunity//Cellular Processes	-	GO:0005488//binding;GO:0097367//carbohydrate derivative binding;GO:1901363//heterocyclic compound binding;GO:0032550//purine ribonucleoside binding;GO:0001883//purine nucleoside binding;GO:0001882//nucleoside binding;GO:0097159//organic cyclic compound binding;GO:0036094//small molecule binding;GO:0003824//catalytic activity;GO:0032549//ribonucleoside binding	GO:1901135//carbohydrate derivative metabolic process;GO:0044700//single organism signaling;GO:0019693//ribose phosphate metabolic process;GO:0034655//nucleobase-containing compound catabolic process;GO:0009056//catabolic process;GO:0055086//nucleobase-containing small molecule metabolic process;GO:1901575//organic substance catabolic process;GO:0046483//heterocycle metabolic process;GO:0072521//…
Unigene0000606	2126.333333	2793	10.9811	11.2544	11.1275	12.8492	13.3784	12.442	11.121	12.88986667	0.212950819	0.56109377	1	no	SOS1	PREDICTED: son of sevenless homolog 1 isoform X1 [Pygocentrus nattereri]	ko04010//MAPK signaling pathway//Signal transduction//Environmental Information Processing;ko04510//Focal adhesion//Cellular commiunity//Cellular Processes;ko04810//Regulation of actin cytoskeleton//Cell motility//Cellular Processes;ko04068//FoxO signaling pathway//Signal transduction//Environmental Information Processing;ko04910//Insulin signaling pathway//Endocrine system//Organismal Systems;ko…	-	-	-
Unigene0000607	104	79.33333333	2.4313	3.4241	1.468	1.5253	1.9549	1.5077	2.441133333	1.662633333	-0.554081056	0.286764221	1	no	hoxb7a	PREDICTED: homeobox protein Hox-B7a-like [Sinocyclocheilus anshuiensis]	-	GO:0043227//membrane-bounded organelle;GO:0043226//organelle;GO:0044464//cell part;GO:0005622//intracellular;GO:0005623//cell;GO:0043229//intracellular organelle;GO:0043231//intracellular membrane-bounded organelle;GO:0044424//intracellular part	GO:0001071//nucleic acid binding transcription factor activity;GO:0003676//nucleic acid binding;GO:1901363//heterocyclic compound binding;GO:0005488//binding;GO:0003677//DNA binding;GO:0097159//organic cyclic compound binding	GO:0006139//nucleobase-containing compound metabolic process;GO:0043170//macromolecule metabolic process;GO:0032774//RNA biosynthetic process;GO:0008152//metabolic process;GO:0044238//primary metabolic process;GO:0018130//heterocycle biosynthetic process;GO:0006725//cellular aromatic compound metabolic process;GO:0009059//macromolecule biosynthetic process;GO:0097659//nucleic acid-templated trans…
Unigene0000608	974.6666667	964.3333333	11.3745	7.3412	10.0357	9.9037	7.8905	7.1451	9.5838	8.3131	-0.205211235	0.614260358	1	no	ZNF34	PREDICTED: zinc finger protein 501-like isoform X2 [Sinocyclocheilus grahami]	-	-	GO:0097159//organic cyclic compound binding;GO:0043169//cation binding;GO:0005488//binding;GO:0043167//ion binding	-
Unigene0000609	64.66666667	46.66666667	1.8994	1.2502	2.0796	0.7734	1.1202	1.4278	1.743066667	1.107133333	-0.654798771	0.231196082	1	no	-	--	-	-	-	-
Unigene0000610	69	54	1.2432	1.0807	2.324	1.3401	0.6404	1.1654	1.5493	1.048633333	-0.563106217	0.318875688	1	no	eif4e1b	PREDICTED: eukaryotic translation initiation factor 4E-1B-like isoform X2 [Cyprinus carpio]	ko03013//RNA transport//Translation//Genetic Information Processing;ko04910//Insulin signaling pathway//Endocrine system//Organismal Systems;ko04150//mTOR signaling pathway//Signal transduction//Environmental Information Processing	GO:0043231//intracellular membrane-bounded organelle;GO:0044424//intracellular part;GO:0034518//RNA cap binding complex;GO:0043229//intracellular organelle;GO:0043227//membrane-bounded organelle;GO:0005623//cell;GO:0043234//protein complex;GO:0044464//cell part;GO:0043226//organelle;GO:0005622//intracellular;GO:0032991//macromolecular complex	GO:1901363//heterocyclic compound binding;GO:0097159//organic cyclic compound binding;GO:0003723//RNA binding;GO:0005488//binding;GO:0003676//nucleic acid binding;GO:0008135//translation factor activity, RNA binding	GO:0044238//primary metabolic process;GO:0071704//organic substance metabolic process;GO:0044260//cellular macromolecule metabolic process;GO:0034645//cellular macromolecule biosynthetic process;GO:0044237//cellular metabolic process;GO:0006518//peptide metabolic process;GO:0044267//cellular protein metabolic process;GO:0006412//translation;GO:1901564//organonitrogen compound metabolic process;GO…
Unigene0000611	17	36.66666667	1.1535	1.1679	0	2.1577	0.6011	1.6552	0.7738	1.471333333	0.927091495	0.30056481	1	no	-	--	-	-	-	-
Unigene0000612	107.3333333	41	2.9004	17.8336	3.4808	1.233	5.1137	2.1369	8.0716	2.827866667	-1.513140582	0.04697644	1	no	-	--	-	-	-	-
Unigene0000613	184.6666667	173.3333333	1.5408	4.306	1.4455	1.8746	3.0158	1.2783	2.430766667	2.056233333	-0.241407428	0.668503822	1	no	GIMAP7	PREDICTED: GTPase IMAP family member 7-like [Sinocyclocheilus rhinocerous]	-	-	GO:1901363//heterocyclic compound binding;GO:0097159//organic cyclic compound binding;GO:0032550//purine ribonucleoside binding;GO:0036094//small molecule binding;GO:0097367//carbohydrate derivative binding;GO:0005488//binding;GO:0001882//nucleoside binding;GO:0032549//ribonucleoside binding;GO:0001883//purine nucleoside binding	-
Unigene0000614	1517	1404.666667	15.7075	8.8118	11.0175	8.3567	9.7177	10.9331	11.8456	9.669166667	-0.292887813	0.467750785	1	no	gag-pol	PREDICTED: protein NYNRIN-like [Oreochromis niloticus]	-	-	-	-
Unigene0000615	1789	1824.333333	10.8523	13.4612	6.9294	7.4133	10.9305	10.0779	10.4143	9.4739	-0.136535522	0.739627535	1	no	pol	PREDICTED: protein NYNRIN-like [Oreochromis niloticus]	-	-	-	-
Unigene0000616	291.6666667	327.3333333	7.6845	5.1051	8.5159	6.3487	6.3862	8.2245	7.101833333	6.986466667	-0.023628491	0.959699904	1	no	CRYBA2	PREDICTED: beta-crystallin A2-like [Sinocyclocheilus rhinocerous]	-	-	-	-
Unigene0000617	33	43.66666667	3.3106	1.813	5.2543	3.3425	5.1023	3.6207	3.4593	4.021833333	0.217373163	0.714656827	1	no	-	PREDICTED: zinc finger protein ZFP69-like isoform X1 [Ictalurus punctatus]	-	-	-	-
Unigene0000618	1.666666667	1	0	0.2282	0.162	0.1993	0	0	0.130066667	0.066433333	-0.969272068	0.816858715	1	no	-	--	-	-	-	-
Unigene0000619	21	19	0.9275	0.5016	1.8692	0.5695	0.7192	1.3074	1.099433333	0.865366667	-0.34537667	0.622612048	1	no	-	--	-	-	-	-
Unigene0000620	0	0.333333333	0	0	0	0	0	0.0986	0.001	0.032866667	5.038553241	1	1	no	-	--	-	-	-	-
Unigene0000621	184	197.3333333	3.887	2.2445	4.483	3.6774	2.9787	3.2842	3.538166667	3.313433333	-0.094675116	0.846106757	1	no	-	PREDICTED: L-rhamnose-binding lectin CSL2-like [Sinocyclocheilus rhinocerous]	-	-	-	-
Unigene0000622	109	159.6666667	1.386	2.8776	1.1597	1.789	3.6673	1.7094	1.807766667	2.388566667	0.401936667	0.467757689	1	no	SLC25A15	PREDICTED: mitochondrial ornithine transporter 1-like [Sinocyclocheilus grahami]	-	GO:0044425//membrane part;GO:0031224//intrinsic component of membrane;GO:0016020//membrane	-	-
Unigene0000623	122.3333333	122.3333333	3.9623	2.3856	3.2693	2.172	3.3717	2.965	3.205733333	2.836233333	-0.176678195	0.715511764	1	no	-	--	-	-	-	-
Unigene0000624	16	25	0.681	1.2524	1.7255	1.2868	1.1971	2.5159	1.219633333	1.6666	0.450460399	0.502467505	1	no	-	--	-	-	-	-
Unigene0000625	84.66666667	78	3.4933	1.1452	4.5444	2.8186	1.2936	3.1812	3.060966667	2.431133333	-0.332358315	0.590407379	1	no	-	--	-	-	-	-
Unigene0000626	768.3333333	873.3333333	6.4761	6.0304	6.678	5.8939	7.5927	5.804	6.394833333	6.4302	0.007956852	0.985250253	1	no	ATF7	PREDICTED: cyclic AMP-dependent transcription factor ATF-7-like isoform X2 [Sinocyclocheilus grahami]	-	-	GO:0097159//organic cyclic compound binding;GO:1901363//heterocyclic compound binding;GO:0003676//nucleic acid binding;GO:0005488//binding;GO:0001071//nucleic acid binding transcription factor activity;GO:0003677//DNA binding	GO:0097659//nucleic acid-templated transcription;GO:0006139//nucleobase-containing compound metabolic process;GO:0008152//metabolic process;GO:0016070//RNA metabolic process;GO:0009058//biosynthetic process;GO:0009987//cellular process;GO:0034645//cellular macromolecule biosynthetic process;GO:1901360//organic cyclic compound metabolic process;GO:0044238//primary metabolic process;GO:0019438//aro…
Unigene0000627	232.3333333	280.6666667	3.074	3.5677	2.7131	3.6865	3.7224	2.5956	3.118266667	3.334833333	0.096870352	0.828931544	1	no	plekha8	PREDICTED: pleckstrin homology domain-containing family A member 8 isoform X1 [Sinocyclocheilus rhinocerous]	-	GO:0043231//intracellular membrane-bounded organelle;GO:0043226//organelle;GO:0005623//cell;GO:0044424//intracellular part;GO:0043227//membrane-bounded organelle;GO:0044464//cell part;GO:0005622//intracellular;GO:0043229//intracellular organelle	GO:0005319//lipid transporter activity;GO:0005215//transporter activity;GO:0022892//substrate-specific transporter activity;GO:0008289//lipid binding;GO:0005488//binding	GO:0051234//establishment of localization;GO:0008104//protein localization;GO:0051179//localization;GO:0033036//macromolecule localization;GO:0045184//establishment of protein localization
Unigene0000628	79.66666667	46	4.0575	1.5193	5.2222	1.5922	0.6224	3.1599	3.599666667	1.7915	-1.006695274	0.13511238	1	no	-	--	-	-	-	-
Unigene0000629	22.66666667	20	1.616	1.7481	2.7916	2.519	1.0025	1.1783	2.0519	1.5666	-0.389323559	0.570037282	1	no	-	--	-	-	-	-
Unigene0000630	34	50	0.6334	0.2741	1.5318	1.2566	0.2838	1.5188	0.8131	1.019733333	0.326687228	0.657399493	1	no	Myt1l	PREDICTED: myelin transcription factor 1-like protein [Sinocyclocheilus anshuiensis]	-	-	-	-
Unigene0000631	73	81.33333333	2.3527	0.589	2.0205	1.9622	2.6689	0.2549	1.654066667	1.628666667	-0.02232602	0.979976054	1	no	-	PREDICTED: sterile alpha motif domain-containing protein 3-like [Danio rerio]	-	-	-	-
Unigene0000632	28.33333333	31	1.1971	5.0258	0	3.4986	0	2.4874	2.0743	1.995333333	-0.055994784	0.979065749	1	no	-	--	-	-	-	-
Unigene0000633	2706.666667	2294.666667	55.8888	34.3327	106.8784	46.4603	20.4598	77.0533	65.69996667	47.99113333	-0.453124755	0.38955884	1	no	stpg1	PREDICTED: O(6)-methylguanine-induced apoptosis 2-like [Sinocyclocheilus anshuiensis]	-	-	-	-
Unigene0000634	48.33333333	47.33333333	1.5632	0.8488	1.9942	1.4313	1.091	1.2362	1.468733333	1.252833333	-0.229377977	0.688451142	1	no	-	--	-	-	-	-
Unigene0000635	49.33333333	47.66666667	2.1857	1.9192	2.2654	1.6397	2.1136	1.6873	2.123433333	1.813533333	-0.227595552	0.672448171	1	no	-	--	-	-	-	-
Unigene0000636	21.33333333	13.66666667	1.1082	0.1438	1.1486	0.5025	0.2062	0.6141	0.8002	0.440933333	-0.859800084	0.289243464	1	no	-	reverse transcriptase [Danio rerio]	-	-	-	-
Unigene0000637	388.3333333	452.6666667	10.3402	7.0924	10.1085	7.8724	9.1627	11.2059	9.180366667	9.413666667	0.036204992	0.933419133	1	no	X-element\ORF2	reverse transcriptase [Danio rerio]	-	-	-	-
Unigene0000638	1307.333333	699	7.2431	3.981	8.4766	2.7534	2.7775	3.6822	6.5669	3.071033333	-1.096488315	0.011506517	1	no	prmt8b	PREDICTED: ras and EF-hand domain-containing protein homolog [Sinocyclocheilus anshuiensis]	-	GO:0044464//cell part;GO:0016020//membrane;GO:0005622//intracellular;GO:0044424//intracellular part;GO:0005623//cell	GO:0016741//transferase activity, transferring one-carbon groups;GO:0003824//catalytic activity;GO:0016273//arginine N-methyltransferase activity;GO:0016274//protein-arginine N-methyltransferase activity;GO:0008168//methyltransferase activity;GO:0016740//transferase activity;GO:0008276//protein methyltransferase activity;GO:0008757//S-adenosylmethionine-dependent methyltransferase activity;GO:000…	GO:0036211//protein modification process;GO:0044699//single-organism process;GO:0035247//peptidyl-arginine omega-N-methylation;GO:0030182//neuron differentiation;GO:0044237//cellular metabolic process;GO:0048699//generation of neurons;GO:0022008//neurogenesis;GO:0019538//protein metabolic process;GO:0048731//system development;GO:0043414//macromolecule methylation;GO:0032501//multicellular organi…
Unigene0000639	1061	1655	9.1724	10.9893	6.7093	16.8922	10.803	9.2172	8.957	12.30413333	0.458055531	0.277084391	1	no	-	PREDICTED: uncharacterized protein LOC103912045 isoform X1 [Danio rerio]	-	-	-	-
Unigene0000640	9.333333333	9.333333333	0.6513	0.4931	0.9	0.8614	0.5387	0.3799	0.681466667	0.593333333	-0.199800255	0.828844151	1	no	-	--	-	-	-	-
Unigene0000641	5.333333333	6.333333333	0.2605	0.1691	0.99	0.443	0.0808	0.9117	0.4732	0.4785	0.016068851	1	1	no	-	--	-	-	-	-
Unigene0000642	132	103.6666667	2.37	1.2463	3.3171	1.6179	0.8693	2.2249	2.311133333	1.5707	-0.557192838	0.31648146	1	no	-	hypothetical protein cypCar_00008992 [Cyprinus carpio]	-	-	-	-
Unigene0000643	69	89	1.3421	2.1777	2.6895	2.3076	1.9705	2.74	2.069766667	2.339366667	0.176649868	0.73694397	1	no	-	--	-	-	-	-
Unigene0000644	84	106.3333333	8.4079	8.1856	10.0218	9.4719	8.4107	11.6782	8.871766667	9.8536	0.151429485	0.758623399	1	no	-	--	-	-	-	-
Unigene0000645	24.33333333	27.33333333	0.9256	1.5249	2.8041	1.937	1.325	1.8688	1.751533333	1.710266667	-0.034397155	1	1	no	-	--	-	-	-	-
Unigene0000646	17.66666667	22.66666667	1.1472	0.9226	0.5687	0.7633	0.8818	1.3528	0.8795	0.9993	0.184234277	0.784410887	1	no	-	--	-	-	-	-
Unigene0000647	38.33333333	23.33333333	0.8489	0.2273	1.4078	0.1804	0.4937	0.6499	0.828	0.441333333	-0.907762051	0.216684715	1	no	-	PREDICTED: microfibril-associated glycoprotein 4-like, partial [Sinocyclocheilus rhinocerous]	-	-	-	-
Unigene0000648	102.3333333	106.6666667	2.3781	1.3404	4.0736	2.4689	1.7238	2.8473	2.597366667	2.346666667	-0.146436764	0.798867312	1	no	-	--	-	-	-	-
Unigene0000649	115.6666667	100.6666667	7.8848	8.6604	6.8453	7.4488	6.2711	4.2453	7.796833333	5.9884	-0.380717705	0.440860192	1	no	-	--	-	-	-	-
Unigene0000650	69.33333333	61.33333333	5.3243	1.1076	3.113	0.8125	1.3974	5.176	3.181633333	2.461966667	-0.369956353	0.616692844	1	no	-	--	-	-	-	-
Unigene0000651	16.66666667	29	0.9857	0.4172	0.7551	0.9838	0.6381	1.6498	0.719333333	1.090566667	0.600345601	0.379155497	1	no	-	--	-	-	-	-
Unigene0000652	135.3333333	157.3333333	2.4434	1.6425	1.8391	2.164	2.179	1.7306	1.975	2.024533333	0.035736743	0.948920138	1	no	BTN3A2	PREDICTED: butyrophilin subfamily 1 member A1-like [Sinocyclocheilus grahami]	ko04514//Cell adhesion molecules (CAMs)//Signaling molecules and interaction//Environmental Information Processing	-	-	-
Unigene0000653	1201	1448	10.6596	7.5438	6.4378	10.469	7.859	7.8079	8.213733333	8.711966667	0.084960324	0.834292454	1	no	Tmem65	PREDICTED: transmembrane protein 65 isoform X2 [Sinocyclocheilus anshuiensis]	-	-	-	-
Unigene0000654	51.66666667	59.66666667	0.6693	0.3989	1.076	0.36	0.8516	0.968	0.714733333	0.726533333	0.023623917	0.988450047	1	no	TY3B-I	PREDICTED: protein turtle homolog B-like [Sinocyclocheilus anshuiensis]	-	-	-	-
Unigene0000655	172.6666667	103	1.6915	2.5911	1.8391	1.1666	1.8162	0.2898	2.040566667	1.090866667	-0.903495069	0.137544981	1	no	-	PREDICTED: SLAM family member 5-like [Sinocyclocheilus anshuiensis]	-	-	-	-
Unigene0000656	8.666666667	5.666666667	0.2153	0.4193	1.2647	0.061	0.1336	0.8792	0.6331	0.357933333	-0.822742491	0.475132991	1	no	-	--	-	-	-	-
Unigene0000657	89.66666667	131.3333333	2.0044	2.3022	1.7507	2.0297	3.3112	2.5616	2.0191	2.634166667	0.383634265	0.432348801	1	no	-	--	-	-	-	-
Unigene0000658	1961.666667	2405.666667	13.8982	13.648	17.0378	15.8986	18.3121	14.013	14.86133333	16.07456667	0.113216289	0.763457264	1	no	set-1	PREDICTED: uncharacterized protein LOC103911548 [Danio rerio]	-	-	-	-
Unigene0000659	1358	934.3333333	22.1308	9.5962	39.2311	13.7878	8.2948	20.0528	23.6527	14.04513333	-0.751934559	0.152535014	1	no	-	PREDICTED: probable GPI-anchored adhesin-like protein PGA55 isoform X1 [Stegastes partitus]	-	-	-	-
Unigene0000660	56	63.66666667	1.04	1.845	0.9821	1.1986	1.828	0.9099	1.289033333	1.312166667	0.025661406	0.976561513	1	no	-	--	-	-	-	-
Unigene0000661	38.66666667	28.66666667	1.2039	0.2548	1.6275	0.445	0.2922	1.2365	1.028733333	0.6579	-0.64492884	0.398081585	1	no	-	--	-	-	-	-
Unigene0000662	493.6666667	588.6666667	4.5839	4.0548	3.5421	4.8263	4.2655	3.7159	4.060266667	4.269233333	0.072402532	0.859537517	1	no	Gtpbp2	PREDICTED: GTP-binding protein 2-like [Sinocyclocheilus rhinocerous]	-	-	GO:0032550//purine ribonucleoside binding;GO:0036094//small molecule binding;GO:0032549//ribonucleoside binding;GO:0005488//binding;GO:0097367//carbohydrate derivative binding;GO:0001883//purine nucleoside binding;GO:0097159//organic cyclic compound binding;GO:1901363//heterocyclic compound binding;GO:0001882//nucleoside binding	-
Unigene0000663	1185.666667	1166.333333	9.0563	6.0906	10.3985	6.04	8.7389	7.3813	8.515133333	7.386733333	-0.205092624	0.617723792	1	no	pol	PREDICTED: myosin-IIIa-like [Sinocyclocheilus rhinocerous]	-	-	-	-
Unigene0000664	134.6666667	135.3333333	7.7201	6.1444	9.053	5.3181	9.2289	5.8671	7.639166667	6.8047	-0.166883709	0.729468864	1	no	-	PREDICTED: receptor-type tyrosine-protein phosphatase mu-like [Sinocyclocheilus grahami]	-	-	-	-
Unigene0000665	1	1	0.2522	0	0.1307	0.2145	0	0.1103	0.127633333	0.108266667	-0.237416028	1	1	no	-	PREDICTED: receptor-type tyrosine-protein phosphatase mu-like [Sinocyclocheilus grahami]	-	-	-	-
Unigene0000666	18.66666667	15	1.2827	0.8815	2.1116	0.8982	0.8426	1.2544	1.425266667	0.9984	-0.513542033	0.449081063	1	no	-	--	-	-	-	-
Unigene0000667	9	17	0	1.2892	0.5779	0.9481	1.6214	0.6098	0.622366667	1.059766667	0.767909957	0.419062309	1	no	-	--	-	-	-	-
Unigene0000668	478.3333333	530.6666667	7.5182	8.0815	7.8601	6.8775	8.3466	7.7908	7.819933333	7.671633333	-0.02762254	0.946461001	1	no	RLN3	PREDICTED: relaxin-3-like [Sinocyclocheilus grahami]	-	-	-	-
Unigene0000669	175	185.6666667	9.0088	8.9623	7.9088	5.6923	9.3908	9.3035	8.626633333	8.128866667	-0.085743412	0.856901796	1	no	-	--	-	-	-	-
Unigene0000670	2900.666667	2969.333333	9.979	8.2596	11.5087	10.1888	7.5532	8.8944	9.915766667	8.8788	-0.159359618	0.672753101	1	no	RNF212B	PREDICTED: homeobox and leucine zipper protein Homez-like [Sinocyclocheilus anshuiensis]	-	-	-	-
Unigene0000671	15.66666667	18	0.6075	0.6801	0.1259	0.439	0.5935	0.4252	0.471166667	0.4859	0.044421955	0.967165113	1	no	-	--	-	-	-	-
Unigene0000672	22.66666667	26.33333333	0.8515	0.5017	0.1626	0.362	0.6464	0.5685	0.505266667	0.525633333	0.057011762	0.953213454	1	no	-	--	-	-	-	-
Unigene0000673	59	54	4.0937	3.6231	3.2787	3.6388	3.1167	2.1165	3.665166667	2.957333333	-0.309581939	0.564279703	1	no	-	--	-	-	-	-
Unigene0000674	223	95	0.9399	9.3791	0.6785	0.7278	2.8893	0.7196	3.665833333	1.445566667	-1.342506051	0.122639753	1	no	-	Mucin-12, partial [Columba livia]	-	-	-	-
Unigene0000675	3139.666667	3145.666667	32.4018	20.8627	35.6021	28.7029	20.0891	28.8735	29.6222	25.8885	-0.194367415	0.622000216	1	no	MAD1L1	mitotic spindle assembly checkpoint protein MAD1 [Danio rerio]	ko04110//Cell cycle//Cell growth and death//Cellular Processes;ko04914//Progesterone-mediated oocyte maturation//Endocrine system//Organismal Systems	-	-	-
Unigene0000676	32.33333333	43.33333333	1.9343	2.2694	0.5655	1.9398	2.4461	1.3452	1.589733333	1.910366667	0.265064785	0.679811173	1	no	-	--	-	-	-	-
Unigene0000677	9.666666667	12.66666667	0.7182	1.1363	0.7444	0.7633	1.0025	1.2568	0.8663	1.007533333	0.217888947	0.796195145	1	no	-	--	-	-	-	-
Unigene0000678	565.6666667	585	7.0026	5.1029	11.6991	5.7651	5.8323	9.8756	7.934866667	7.157666667	-0.148716622	0.747994809	1	no	-	--	-	-	-	-
Unigene0000679	324.6666667	302.3333333	7.791	4.2502	10.0012	4.6255	5.229	8.0898	7.347466667	5.981433333	-0.296755669	0.534560758	1	no	-	TPA_exp: polyprotein [Danio rerio]	-	-	-	-
Unigene0000680	2591.333333	2951.666667	59.3137	68.7329	78.3262	79.353	68.5984	58.6251	68.79093333	68.85883333	0.001423308	0.997333753	1	no	PQBP1	PREDICTED: polyglutamine-binding protein 1-like [Sinocyclocheilus anshuiensis]	ko03040//Spliceosome//Transcription//Genetic Information Processing	-	-	-
Unigene0000681	12219.33333	10099.66667	135.0263	92.8217	245.7254	137.6353	57.7745	142.0808	157.8578	112.4968667	-0.488740729	0.296164049	1	no	tacc3	PREDICTED: transforming acidic coiled-coil-containing protein 3-like isoform X1 [Sinocyclocheilus rhinocerous]	ko03013//RNA transport//Translation//Genetic Information Processing	-	-	-
Unigene0000682	28.66666667	15	3.3106	2.0293	5.3377	1.7723	0.4564	2.5747	3.5592	1.601133333	-1.152459551	0.117797309	1	no	-	--	-	-	-	-
Unigene0000683	12487.33333	13423.66667	417.4561	786.789	429.4629	521.566	561.1377	478.1197	544.5693333	520.2744667	-0.065842835	0.865958342	1	no	rps27	40S ribosomal protein S27, partial [Scophthalmus maximus]	ko03010//Ribosome//Translation//Genetic Information Processing	GO:0044464//cell part;GO:0030529//intracellular ribonucleoprotein complex;GO:0005623//cell;GO:0005622//intracellular;GO:0044424//intracellular part;GO:0032991//macromolecular complex;GO:1990904//ribonucleoprotein complex	GO:0043167//ion binding;GO:0005198//structural molecule activity;GO:0043169//cation binding;GO:0005488//binding	GO:0071704//organic substance metabolic process;GO:0008152//metabolic process;GO:0010467//gene expression;GO:0043170//macromolecule metabolic process
Unigene0000684	375	224.3333333	58.3106	14.1125	51.6262	17.9775	25.2538	21.9328	41.34976667	21.72136667	-0.928764311	0.081781037	1	no	LIAT1	Zgc:64189 [Danio rerio]	-	-	-	-
Unigene0000685	90.33333333	98	1.1515	0.4409	1.9713	0.528	0.9993	1.8452	1.1879	1.124166667	-0.07955745	0.910862821	1	no	-	--	-	-	-	-
Unigene0000686	84.66666667	63	2.0942	2.6384	3.1282	0.8117	2.2353	2.1556	2.620266667	1.7342	-0.595443354	0.281378883	1	no	-	--	-	-	-	-
Unigene0000687	1335.333333	1459.666667	11.0425	9.8832	9.9171	10.74	10.0325	8.9358	10.28093333	9.902766667	-0.054067691	0.887477297	1	no	CLINT1	PREDICTED: clathrin interactor 1-like isoform X1 [Cyprinus carpio]	ko04144//Endocytosis//Transport and catabolism//Cellular Processes	-	-	-
Unigene0000688	7.333333333	5	0.4671	0.1819	0.3873	0.1589	0.1304	0.3269	0.345433333	0.2054	-0.749971124	0.441100712	1	no	-	unnamed protein product [Oncorhynchus mykiss]	-	-	-	-
Unigene0000689	36	40.66666667	0.9085	0.8504	2.0643	1.0695	1.0079	1.6814	1.2744	1.252933333	-0.024508519	0.983010929	1	no	-	PREDICTED: uncharacterized protein LOC107727458 [Sinocyclocheilus rhinocerous]	-	-	-	-
Unigene0000690	2.666666667	2	0.1926	0.375	0.1996	0	0.4481	0.0843	0.255733333	0.177466667	-0.527092149	0.86379	1	no	-	--	-	-	-	-
Unigene0000691	0.333333333	1.333333333	0.0571	0	0	0.1456	0.0531	0	0.019033333	0.066233333	1.799029222	0.487017434	1	no	-	--	-	-	-	-
Unigene0000692	69	79	2.0518	2.0501	1.4831	1.9282	1.8339	1.8897	1.861666667	1.883933333	0.017153133	0.989392998	1	no	-	PREDICTED: HIRA-interacting protein 3-like isoform X3 [Sinocyclocheilus grahami]	-	-	-	-
Unigene0000693	15.66666667	10	0.7492	0.3647	0.6601	0.4459	0.2789	0.2622	0.591333333	0.329	-0.84588402	0.237205202	1	no	-	PREDICTED: putative nuclease HARBI1 [Cyprinus carpio]	-	-	-	-
Unigene0000694	12.66666667	16.66666667	0.1859	1.1761	0.3853	0.8691	0.9945	0.2033	0.582433333	0.688966667	0.24234126	0.807900943	1	no	-	--	-	-	-	-
Unigene0000695	3791	4324	31.7149	39.5848	16.9982	25.664	41.0972	23.5413	29.43263333	30.10083333	0.032386802	0.939752895	1	no	CANX	calnexin 2 [Cyprinus carpio]	ko04141//Protein processing in endoplasmic reticulum//Folding, sorting and degradation//Genetic Information Processing;ko04145//Phagosome//Transport and catabolism//Cellular Processes	GO:0005622//intracellular;GO:0043231//intracellular membrane-bounded organelle;GO:0043229//intracellular organelle;GO:0044424//intracellular part;GO:0043227//membrane-bounded organelle;GO:0044464//cell part;GO:0043226//organelle;GO:0005623//cell	GO:0003824//catalytic activity;GO:0004197//cysteine-type endopeptidase activity;GO:0016787//hydrolase activity;GO:0008234//cysteine-type peptidase activity;GO:0005488//binding;GO:0070011//peptidase activity, acting on L-amino acid peptides;GO:0008233//peptidase activity;GO:0004175//endopeptidase activity;GO:0005515//protein binding	GO:0044238//primary metabolic process;GO:0008152//metabolic process;GO:0044237//cellular metabolic process;GO:0044260//cellular macromolecule metabolic process;GO:0043170//macromolecule metabolic process;GO:0051604//protein maturation;GO:0019538//protein metabolic process;GO:0016485//protein processing;GO:0071704//organic substance metabolic process;GO:0010467//gene expression;GO:0006508//proteol…
Unigene0000696	66	166.3333333	1.3138	0.4901	0.6363	0.7412	2.9821	1.7941	0.8134	1.839133333	1.17698918	0.054413428	1	no	SLC25A29	PREDICTED: mitochondrial basic amino acids transporter-like isoform X1 [Cyprinus carpio]	-	-	-	-
Unigene0000697	18.33333333	15	0.1388	0.4393	1.3672	0.2656	0.5814	0.5467	0.648433333	0.464566667	-0.481072613	0.590244862	1	no	-	vacuolar protein sorting 52 [Salmo salar]	-	-	-	-
Unigene0000698	350.6666667	371	4.423	3.4119	3.2933	2.522	4.7051	3.2602	3.7094	3.495766667	-0.085576956	0.847022796	1	no	-	--	-	-	-	-
Unigene0000699	22.66666667	18.33333333	2.2261	0.8891	0.7691	1.2618	0.5311	0.9489	1.294766667	0.913933333	-0.502531292	0.479540587	1	no	-	--	-	-	-	-
Unigene0000700	363.3333333	328	7.8693	8.3315	10.7562	7.5479	5.9725	7.7887	8.985666667	7.103033333	-0.339190289	0.422503011	1	no	STK19	PREDICTED: serine/threonine-protein kinase 19 isoform X2 [Sinocyclocheilus grahami]	-	-	-	-
Unigene0000701	6	8.666666667	0.2296	0.2236	0.9521	0.1952	0.2849	1.2725	0.468433333	0.5842	0.318618618	0.77979721	1	no	-	--	-	-	-	-
Unigene0000702	112.6666667	108.6666667	1.8955	1.1881	1.3187	0.7396	1.7638	1.2836	1.467433333	1.262333333	-0.217202042	0.681493221	1	no	pol	PREDICTED: uncharacterized protein LOC108184914 [Danio rerio]	-	-	-	-
Unigene0000703	19	26	0.8149	0.5049	0.8063	0.5039	1.5511	0.551	0.7087	0.868666667	0.293627629	0.671976582	1	no	PEG10	Retrotransposable element Tf2 protein type 1 [Larimichthys crocea]	ko03410//Base excision repair//Replication and repair//Genetic Information Processing	-	-	-
Unigene0000704	6.333333333	8	0.5327	0.7409	0.1578	0.5177	0.779	0.3329	0.477133333	0.5432	0.187091001	0.869002661	1	no	-	--	-	-	-	-
Unigene0000705	527.6666667	353.6666667	5.9529	2.5087	13.7684	4.2646	0.7565	7.692	7.41	4.2377	-0.806192084	0.260039208	1	no	efhc2	PREDICTED: EF-hand domain-containing family member C2-like isoform X1 [Sinocyclocheilus rhinocerous]	-	-	GO:0046872//metal ion binding;GO:0005488//binding;GO:0043169//cation binding;GO:0043167//ion binding	-
Unigene0000706	149.6666667	190	2.5083	1.8158	1.4532	1.8592	2.1785	2.4534	1.925766667	2.1637	0.16806757	0.721625394	1	no	-	--	-	-	-	-
Unigene0000707	35	29	1.0198	0.9628	1.2813	1.1299	0.7189	0.5137	1.087966667	0.7875	-0.466282527	0.427579202	1	no	-	--	-	-	-	-
Unigene0000708	21.33333333	25.66666667	1.7826	0.7438	2.9915	2.0209	2.2118	1.5597	1.8393	1.9308	0.070041921	0.949082732	1	no	-	--	-	-	-	-
Unigene0000709	62.66666667	63.66666667	2.1978	1.6522	1.3841	1.2773	1.9934	1.4605	1.7447	1.577066667	-0.145735339	0.779529461	1	no	-	--	-	-	-	-
Unigene0000710	44.66666667	30.33333333	0.5821	0.644	2.3859	0.8548	0.6155	0.6482	1.204	0.706166667	-0.769754764	0.248541874	1	no	-	PREDICTED: protein MAATS1 isoform X1 [Danio rerio]	-	-	GO:0097159//organic cyclic compound binding;GO:0005488//binding	GO:1901360//organic cyclic compound metabolic process;GO:0008152//metabolic process;GO:0006259//DNA metabolic process;GO:0044260//cellular macromolecule metabolic process;GO:0034641//cellular nitrogen compound metabolic process;GO:0071704//organic substance metabolic process;GO:0043170//macromolecule metabolic process;GO:0009987//cellular process;GO:0006725//cellular aromatic compound metabolic p…
Unigene0000711	14.66666667	11	1.9069	1.1345	1.6471	0.7206	0.7886	1.5757	1.562833333	1.0283	-0.603902709	0.404928219	1	no	-	--	-	-	-	-
Unigene0000712	3320	3788.666667	65.1815	64.8218	70.0907	71.7076	56.8163	71.8645	66.698	66.79613333	0.002121089	0.995646307	1	no	sap30l	PREDICTED: histone deacetylase complex subunit SAP30L [Cyprinus carpio]	-	GO:0043226//organelle;GO:0043231//intracellular membrane-bounded organelle;GO:0044424//intracellular part;GO:0005623//cell;GO:0043227//membrane-bounded organelle;GO:0043229//intracellular organelle;GO:0044464//cell part;GO:0005622//intracellular	GO:0043169//cation binding;GO:0005488//binding;GO:0043167//ion binding	GO:0018130//heterocycle biosynthetic process;GO:0044260//cellular macromolecule metabolic process;GO:0006807//nitrogen compound metabolic process;GO:0044237//cellular metabolic process;GO:1901576//organic substance biosynthetic process;GO:0016070//RNA metabolic process;GO:0044271//cellular nitrogen compound biosynthetic process;GO:0044238//primary metabolic process;GO:0046483//heterocycle metabol…
Unigene0000713	14	14	1.1035	1.4325	1.3344	1.0164	1.7115	0.7241	1.290133333	1.150666667	-0.16505021	0.834820028	1	no	-	PREDICTED: zinc finger BED domain-containing protein 5-like [Larimichthys crocea]	-	-	-	-
Unigene0000714	36.66666667	40.66666667	1.3462	0.5983	1.3043	0.9206	0.2996	1.8948	1.082933333	1.038333333	-0.060674769	0.941485801	1	no	-	--	-	-	-	-
Unigene0000715	83.33333333	93.33333333	1.2098	2.0373	0.8134	0.9591	2.069	1.0728	1.3535	1.366966667	0.014283176	0.992151081	1	no	-	--	-	-	-	-
Unigene0000716	36.66666667	28.66666667	1.9886	2.64	0.2811	0.5764	1.9767	0.949	1.636566667	1.167366667	-0.487414594	0.531019424	1	no	-	--	-	-	-	-
Unigene0000717	38.33333333	51	1.2228	1.3066	0.8965	1.1158	1.5265	1.4091	1.141966667	1.350466667	0.241937491	0.664870483	1	no	-	PREDICTED: muscle M-line assembly protein unc-89-like [Sinocyclocheilus rhinocerous]	-	-	-	-
Unigene0000718	51	46	0.7561	1.4142	0.8662	0.7275	1.2406	0.4875	1.012166667	0.818533333	-0.306333794	0.60490638	1	no	-	--	-	-	-	-
Unigene0000719	497.3333333	528	4.2395	2.1004	3.9611	2.3118	3.4862	3.8351	3.433666667	3.211033333	-0.096712351	0.829678986	1	no	-	PREDICTED: uncharacterized protein LOC107591874 [Sinocyclocheilus grahami]	-	-	-	-
Unigene0000720	385	330.3333333	12.4108	8.4703	16.411	8.4035	6.6078	12.8736	12.4307	9.294966667	-0.419385943	0.36407991	1	no	-	--	-	-	-	-
Unigene0000721	77	154.6666667	0.9072	1.567	0.8948	1.58	2.519	1.946	1.123	2.015	0.843421911	0.094993217	1	no	PEG10	Retrotransposable element Tf2 protein type 1 [Larimichthys crocea]	-	-	-	-
Unigene0000722	18	27	0.9865	1.256	1.8878	1.6131	1.9067	1.9255	1.376766667	1.8151	0.39876496	0.531556208	1	no	-	--	-	-	-	-
Unigene0000723	244.3333333	229.6666667	11.9415	9.9067	12.3771	7.7826	10.8093	9.8382	11.40843333	9.4767	-0.267644014	0.540037179	1	no	-	--	-	-	-	-
Unigene0000724	31.66666667	23	0.9372	1.8249	0.5037	0.5607	0.8398	0.7289	1.0886	0.7098	-0.616989462	0.339471193	1	no	-	--	-	-	-	-
Unigene0000725	80.66666667	94	7.2405	3.1535	5.0689	5.292	5.851	4.7234	5.1543	5.2888	0.03716391	0.94847244	1	no	-	--	-	-	-	-
Unigene0000726	26.33333333	28.33333333	0.7653	0.4524	0.9632	0.8598	0.6613	0.5261	0.726966667	0.6824	-0.091271568	0.904748506	1	no	-	PREDICTED: mucin-19-like [Sinocyclocheilus anshuiensis]	-	-	-	-
Unigene0000727	39.66666667	51.33333333	0.8085	1.1688	0.9396	0.6458	1.3679	1.3505	0.9723	1.1214	0.205827548	0.714654338	1	no	KCNH7	PREDICTED: potassium voltage-gated channel subfamily H member 2-like [Sinocyclocheilus rhinocerous]	-	-	-	-
Unigene0000728	21	13.66666667	0.9967	1.8021	1.6972	1.1501	0.3975	0.9967	1.498666667	0.8481	-0.821373246	0.231122582	1	no	-	--	-	-	-	-
Unigene0000729	9.333333333	39.33333333	0.5272	0.2717	0.0643	1.7666	0.2886	1.1125	0.287733333	1.0559	1.87566894	0.024237228	1	no	-	--	-	-	-	-
Unigene0000730	1411	1727	6.9661	6.8708	5.5063	6.0509	7.4471	7.4777	6.447733333	6.9919	0.116892473	0.76057278	1	no	Map4	PREDICTED: microtubule-associated protein 4-like isoform X3 [Sinocyclocheilus grahami]	-	-	-	-
Unigene0000731	284	416.6666667	3.8583	7.2491	4.2046	6.7141	7.1302	6.1047	5.104	6.649666667	0.381653694	0.388138754	1	no	ICOSLG	PREDICTED: CD276 antigen homolog [Sinocyclocheilus anshuiensis]	-	-	-	-
Unigene0000732	26.66666667	45.33333333	1.5663	1.4556	2.7304	1.9976	3.5775	3.0523	1.917433333	2.8758	0.584786928	0.317680303	1	no	-	PREDICTED: CXADR-like membrane protein [Cyprinus carpio]	-	-	-	-
Unigene0000733	18.33333333	33	1.4209	0.3873	1.3549	0.7732	2.803	1.4918	1.054366667	1.689333333	0.680077358	0.33534462	1	no	-	--	-	-	-	-
Unigene0000734	12	5.333333333	1.2472	0.6428	0.7604	0	0.9558	0.1284	0.883466667	0.3614	-1.289579196	0.231094199	1	no	-	--	-	-	-	-
Unigene0000735	4	2	0.3766	0.3666	0	0	0	0.3295	0.247733333	0.109833333	-1.173472036	0.537775842	1	no	-	PREDICTED: zinc finger protein 2-like isoform X1 [Sinocyclocheilus anshuiensis]	-	-	-	-
Unigene0000736	36.66666667	60.33333333	3.4492	1.7989	1.5322	6.0747	1.3182	2.2634	2.2601	3.218766667	0.51012139	0.443333179	1	no	-	--	-	-	-	-
Unigene0000737	7.333333333	0	0	0.2043	0.3141	0	0	0	0.1728	0.001	-7.432959407	0.003562567	0.715740371	no	-	PREDICTED: E3 ubiquitin-protein ligase RNF213 isoform X3 [Salmo salar]	-	-	-	-
Unigene0000738	106.3333333	86.66666667	0.9025	0.9505	0.7654	0.4953	0.8169	0.5886	0.8728	0.6336	-0.462078766	0.348154518	1	no	Flt3	PREDICTED: receptor-type tyrosine-protein kinase FLT3-like [Sinocyclocheilus grahami]	ko04060//Cytokine-cytokine receptor interaction//Signaling molecules and interaction//Environmental Information Processing	-	-	-
Unigene0000739	760	957.3333333	4.8093	5.9079	3.2404	4.8514	7.293	3.5844	4.652533333	5.242933333	0.172357715	0.697559374	1	no	CNNM2	PREDICTED: metal transporter CNNM2-like isoform X1 [Sinocyclocheilus grahami]	-	-	-	-
Unigene0000740	8.333333333	2.666666667	1.516	0.5209	0.1849	0	0.3319	0.3121	0.7406	0.214666667	-1.786596362	0.139364575	1	no	Slc26a4	PREDICTED: pendrin-like [Sinocyclocheilus rhinocerous]	-	GO:0044425//membrane part;GO:0016020//membrane;GO:0031224//intrinsic component of membrane	GO:0022857//transmembrane transporter activity;GO:0005215//transporter activity;GO:0015075//ion transmembrane transporter activity;GO:0022891//substrate-specific transmembrane transporter activity;GO:0022892//substrate-specific transporter activity;GO:0015103//inorganic anion transmembrane transporter activity;GO:0008509//anion transmembrane transporter activity	GO:0048878//chemical homeostasis;GO:0051179//localization;GO:0006811//ion transport;GO:0006820//anion transport;GO:0006950//response to stress;GO:0042592//homeostatic process;GO:0015698//inorganic anion transport;GO:0044763//single-organism cellular process;GO:0065007//biological regulation;GO:0006810//transport;GO:0044699//single-organism process;GO:0009987//cellular process;GO:0009628//response…
Unigene0000741	322.6666667	358	3.6299	5.4972	2.6476	3.4915	5.1406	3.0583	3.9249	3.8968	-0.010366009	0.984020345	1	no	STEAP3	PREDICTED: metalloreductase STEAP3-like [Sinocyclocheilus anshuiensis]	ko04115//p53 signaling pathway//Cell growth and death//Cellular Processes	-	-	-
Unigene0000742	37.33333333	43.66666667	1.7963	2.2775	0.5629	1.5273	1.6715	1.6447	1.545566667	1.6145	0.062951556	0.936766607	1	no	-	--	-	-	-	-
Unigene0000743	25	30	0.5867	1.9583	0.5647	1.1045	1.2089	1.0266	1.036566667	1.113333333	0.103072696	0.891143791	1	no	-	PREDICTED: mucin-5AC [Danio rerio]	-	-	-	-
Unigene0000744	34.33333333	35.33333333	0.4204	1.0914	0.5395	0.6978	0.6147	0.5605	0.683766667	0.624333333	-0.1311876	0.829814244	1	no	-	PREDICTED: mucin-17-like [Cyprinus carpio]	-	-	-	-
Unigene0000745	8.333333333	6.666666667	0.4598	1.1639	0.6672	0.3909	0.599	0.6437	0.763633333	0.544533333	-0.487859714	0.610093622	1	no	-	--	-	-	-	-
Unigene0000746	0	0.666666667	0	0	0	0	0.1257	0	0.001	0.0419	5.388878339	0.560332994	1	no	C7orf55	PREDICTED: UPF0562 protein C7orf55 homolog [Danio rerio]	-	-	-	-
Unigene0000747	2.666666667	8.333333333	0.0595	0.2318	0.1851	0.506	0.4984	0.3124	0.1588	0.438933333	1.466790923	0.125300433	1	no	-	--	-	-	-	-
Unigene0000748	7.666666667	6	0.966	0.4702	0.4172	0.4107	0.5244	0.3522	0.6178	0.4291	-0.52582597	0.581958024	1	no	-	--	-	-	-	-
Unigene0000749	32.33333333	28	1.3256	0.6848	0.6169	0.736	0.579	0.6864	0.875766667	0.667133333	-0.392571412	0.506926907	1	no	-	PREDICTED: low density lipoprotein receptor adapter protein 1-like isoform X1 [Sinocyclocheilus grahami]	-	-	-	-
Unigene0000750	37.33333333	58	3.3652	2.0628	1.5502	3.6029	4.1752	1.8538	2.326066667	3.210633333	0.464965467	0.431565343	1	no	Tuba1b	PREDICTED: tubulin alpha chain-like [Peromyscus maniculatus bairdii]	ko04145//Phagosome//Transport and catabolism//Cellular Processes;ko04540//Gap junction//Cellular commiunity//Cellular Processes	GO:0043227//membrane-bounded organelle;GO:0044464//cell part;GO:0031988//membrane-bounded vesicle;GO:0043226//organelle;GO:0043228//non-membrane-bounded organelle;GO:0044430//cytoskeletal part;GO:0044422//organelle part;GO:0043231//intracellular membrane-bounded organelle;GO:0005623//cell;GO:0031982//vesicle;GO:0099513//polymeric cytoskeletal fiber;GO:0043232//intracellular non-membrane-bounded o…	GO:0001883//purine nucleoside binding;GO:1901363//heterocyclic compound binding;GO:0016817//hydrolase activity, acting on acid anhydrides;GO:0032550//purine ribonucleoside binding;GO:0032549//ribonucleoside binding;GO:0005198//structural molecule activity;GO:0017111//nucleoside-triphosphatase activity;GO:0097367//carbohydrate derivative binding;GO:0016818//hydrolase activity, acting on acid anhyd…	GO:0070670//response to interleukin-4;GO:0009259//ribonucleotide metabolic process;GO:1901565//organonitrogen compound catabolic process;GO:0006725//cellular aromatic compound metabolic process;GO:0009154//purine ribonucleotide catabolic process;GO:1901361//organic cyclic compound catabolic process;GO:0006793//phosphorus metabolic process;GO:1901136//carbohydrate derivative catabolic process;GO:0…
Unigene0000751	8.333333333	3.666666667	1.1297	1.3442	0.6505	0.3202	0.7008	0.2196	1.041466667	0.413533333	-1.332541136	0.129422342	1	no	-	--	-	-	-	-
Unigene0000752	55.66666667	53	5.6097	5.9089	3.8127	4.2222	3.6797	4.9885	5.110433333	4.2968	-0.250183001	0.643207877	1	no	-	--	-	-	-	-
Unigene0000753	28	16.33333333	1.8572	2.6728	2.2597	0.9611	0.6762	1.8368	2.263233333	1.158033333	-0.966708549	0.136183427	1	no	-	--	-	-	-	-
Unigene0000754	0.666666667	0	0.2216	0	0	0	0	0	0.073866667	0.001	-6.20685157	0.560950547	1	no	-	--	-	-	-	-
Unigene0000755	24	27.66666667	0.9316	1.6844	0.5518	1.2824	1.0733	0.8927	1.055933333	1.0828	0.03624804	0.975628201	1	no	-	--	-	-	-	-
Unigene0000756	24	28.33333333	1.8918	1.1432	1.6903	1.4975	2.0639	1.3698	1.5751	1.643733333	0.061532841	0.948825967	1	no	-	--	-	-	-	-
Unigene0000757	4	8.333333333	0.1926	0.5626	0.3993	0.6551	0.8066	0.6741	0.384833333	0.711933333	0.887508384	0.311965253	1	no	-	--	-	-	-	-
Unigene0000758	33.66666667	35.33333333	1.2872	1.6709	0.9703	2.2551	1.1252	0.2389	1.309466667	1.2064	-0.118271002	0.889515154	1	no	-	--	-	-	-	-
Unigene0000759	25.33333333	27.33333333	1.5383	1.758	1.8023	1.251	2.0538	1.5799	1.699533333	1.628233333	-0.061831199	0.922530049	1	no	-	--	-	-	-	-
Unigene0000760	72.33333333	65.66666667	2.5813	1.0559	1.0792	1.3094	0.8477	1.5942	1.572133333	1.250433333	-0.330295436	0.568623414	1	no	NT5C1A	PREDICTED: cytosolic 5'-nucleotidase 1A-like isoform X2 [Latimeria chalumnae]	ko01100//Metabolic pathways//Global and Overview//Metabolism;ko01110//Biosynthesis of secondary metabolites//Global and Overview//Metabolism;ko00230//Purine metabolism//Nucleotide metabolism//Metabolism;ko00240//Pyrimidine metabolism//Nucleotide metabolism//Metabolism;ko00760//Nicotinate and nicotinamide metabolism//Metabolism of cofactors and vitamins//Metabolism	-	-	-
Unigene0000761	8.666666667	8.666666667	1.2675	0.1948	0.2766	0.9643	0.2483	0.2918	0.579633333	0.501466667	-0.208986758	0.855497709	1	no	-	--	-	-	-	-
Unigene0000762	40	29.33333333	3.2269	1.6597	2.4611	1.7083	1.3031	1.7046	2.449233333	1.572	-0.639729005	0.260919078	1	no	-	--	-	-	-	-
Unigene0000763	20	14.66666667	2.303	0.9809	1.0443	1.285	0.6697	0.8186	1.442733333	0.924433333	-0.642163478	0.352090187	1	no	-	--	-	-	-	-
Unigene0000764	202	207	4.771	3.5573	5.8858	4.0169	3.7249	5.0092	4.738033333	4.250333333	-0.156712359	0.736379083	1	no	-	--	-	-	-	-
Unigene0000765	26.66666667	25.66666667	1.6133	0.6544	1.347	1.3336	0.9591	0.745	1.2049	1.012566667	-0.250896519	0.69398642	1	no	Znf354c	PREDICTED: gastrula zinc finger protein XlCGF49.1-like [Sinocyclocheilus rhinocerous]	-	-	-	-
Unigene0000766	14	14.33333333	1.1449	0.966	1.1075	1.4277	0.9943	0.4675	1.0728	0.963166667	-0.155523773	0.838150652	1	no	-	--	-	-	-	-
Unigene0000767	53.33333333	63	2.0564	1.7259	1.9109	1.447	1.5176	2.947	1.897733333	1.970533333	0.054308873	0.925573659	1	no	-	--	-	-	-	-
Unigene0000768	6.666666667	12.66666667	0.3166	0.2055	1.6405	0.0897	0.0982	3.3235	0.720866667	1.170466667	0.699279504	0.612634521	1	no	-	Nipped-B-like B, partial [Nestor notabilis]	-	-	-	-
Unigene0000769	35	34.66666667	4.5188	4.6437	4.0331	4.1621	3.3873	3.9536	4.398533333	3.834333333	-0.198046784	0.716087426	1	no	-	--	-	-	-	-
Unigene0000770	18.33333333	18	1.1162	0.6915	0.9992	0.949	0.9443	0.5327	0.935633333	0.808666667	-0.210398116	0.765450493	1	no	-	--	-	-	-	-
Unigene0000771	7.333333333	1.666666667	1.0689	0.5781	0.9848	0.5049	0	0	0.877266667	0.1683	-2.381980275	0.039674749	1	no	-	--	-	-	-	-
Unigene0000772	174	323.3333333	8.0343	7.075	5.984	8.7876	15.1403	10.9857	7.0311	11.63786667	0.727004304	0.107441987	1	no	-	PREDICTED: cytochrome c oxidase copper chaperone [Anolis carolinensis]	ko01100//Metabolic pathways//Global and Overview//Metabolism;ko00190//Oxidative phosphorylation//Energy metabolism//Metabolism	-	-	-
Unigene0000773	10.33333333	70.66666667	0.6879	0.4688	0.9982	0.8773	0.8322	11.0747	0.7183	4.2614	2.568669057	0.006000019	0.849178348	no	-	--	-	-	-	-
Unigene0000774	9.333333333	22	0.4295	0.3833	0.1855	0.5477	1.2323	0.3445	0.332766667	0.708166667	1.089578012	0.149975568	1	no	-	PREDICTED: E3 ubiquitin-protein ligase CBL-like [Sinocyclocheilus anshuiensis]	-	GO:0005623//cell;GO:0005622//intracellular;GO:0043227//membrane-bounded organelle;GO:0043231//intracellular membrane-bounded organelle;GO:0044464//cell part;GO:0044424//intracellular part;GO:0043229//intracellular organelle;GO:0043226//organelle	GO:0019787//ubiquitin-like protein transferase activity;GO:0045309//protein phosphorylated amino acid binding;GO:0043167//ion binding;GO:0043169//cation binding;GO:0005515//protein binding;GO:0005488//binding;GO:0016740//transferase activity;GO:0046914//transition metal ion binding;GO:0046872//metal ion binding;GO:0003824//catalytic activity;GO:0051219//phosphoprotein binding	GO:0009987//cellular process;GO:0051716//cellular response to stimulus;GO:0050794//regulation of cellular process;GO:0044700//single organism signaling;GO:0044763//single-organism cellular process;GO:0065007//biological regulation;GO:0007165//signal transduction;GO:0050789//regulation of biological process;GO:0044699//single-organism process;GO:0050896//response to stimulus;GO:0023052//signaling;…
Unigene0000775	18.66666667	20.66666667	0.7476	1.3516	0.8855	2.1792	0.3975	0.2803	0.9949	0.952333333	-0.063084893	0.974708959	1	no	-	--	-	-	-	-
Unigene0000776	74.66666667	99	0.8329	0.9649	0.5573	0.5558	1.5501	0.7103	0.785033333	0.938733333	0.257961475	0.650234986	1	no	SLC5A5	PREDICTED: sodium/iodide cotransporter [Sinocyclocheilus grahami]	-	GO:0044425//membrane part;GO:0016020//membrane;GO:0031224//intrinsic component of membrane	-	GO:0044699//single-organism process;GO:0009987//cellular process;GO:0044763//single-organism cellular process
Unigene0000777	796.3333333	685	17.8004	38.257	17.0772	16.6006	23.0978	16.571	24.3782	18.75646667	-0.378203527	0.405604632	1	no	LAMP1	--	ko04145//Phagosome//Transport and catabolism//Cellular Processes;ko04142//Lysosome//Transport and catabolism//Cellular Processes	-	-	-
Unigene0000778	1826.333333	1773.666667	22.9769	37.7382	18.3308	18.0195	30.1355	20.6105	26.34863333	22.92183333	-0.201005695	0.637024641	1	no	LAMP1	PREDICTED: lysosome-associated membrane glycoprotein 1-like [Sinocyclocheilus anshuiensis]	ko04145//Phagosome//Transport and catabolism//Cellular Processes;ko04142//Lysosome//Transport and catabolism//Cellular Processes	-	-	-
Unigene0000779	13.33333333	8.666666667	0.9737	0.7584	0.8747	0.7175	0.3624	0.3976	0.868933333	0.4925	-0.81912177	0.241418272	1	no	-	--	-	-	-	-
Unigene0000780	1	1.666666667	0.2768	0	0	0.1569	0.1717	0.0807	0.092266667	0.136433333	0.564314724	0.800622408	1	no	zgc:103499	--	-	-	-	-
Unigene0000781	141.3333333	74.66666667	18.9646	6.0482	21.8028	7.7841	3.6511	9.9175	15.6052	7.117566667	-1.132570841	0.05978053	1	no	-	--	-	-	-	-
Unigene0000782	1173	1319	26.8321	28.8254	20.6165	25.8378	28.2583	21.9389	25.42466667	25.345	-0.004527696	0.991515848	1	no	zgc:162885	PREDICTED: mitochondrial inner membrane protease ATP23 homolog isoform X1 [Sinocyclocheilus grahami]	-	-	GO:0008233//peptidase activity;GO:0070011//peptidase activity, acting on L-amino acid peptides;GO:0043169//cation binding;GO:0004175//endopeptidase activity;GO:0005488//binding;GO:0016787//hydrolase activity;GO:0003824//catalytic activity;GO:0043167//ion binding	GO:0010467//gene expression;GO:0071704//organic substance metabolic process;GO:0043170//macromolecule metabolic process;GO:0008152//metabolic process;GO:0044238//primary metabolic process;GO:0006508//proteolysis;GO:0016485//protein processing;GO:0051604//protein maturation;GO:0019538//protein metabolic process
Unigene0000783	707.6666667	920.6666667	4.9606	4.5543	4.4674	5.9549	5.8999	4.2022	4.660766667	5.352333333	0.199600679	0.619516781	1	no	PACS2	PREDICTED: phosphofurin acidic cluster sorting protein 2-like isoform X2 [Sinocyclocheilus anshuiensis]	-	-	-	-
Unigene0000784	8.333333333	5	0.5869	1	0.2281	0.3743	0.4779	0.1284	0.605	0.326866667	-0.888232881	0.346877655	1	no	-	--	-	-	-	-
Unigene0000785	18.33333333	16.66666667	0.8389	0.1945	1.2007	0.4755	0.6691	0.6291	0.7447	0.591233333	-0.332931748	0.671548371	1	no	-	--	-	-	-	-
Unigene0000786	42.66666667	35	1.7367	1.7676	1.5546	1.4766	1.2855	0.8979	1.6863	1.22	-0.466980073	0.391867033	1	no	-	PREDICTED: S-antigen protein-like [Cavia porcellus]	-	-	-	-
Unigene0000787	90.33333333	95.66666667	3.8823	6.7309	3.7483	4.4765	4.4045	4.6066	4.787166667	4.495866667	-0.090572784	0.858884211	1	no	-	--	-	-	-	-
Unigene0000788	27.33333333	33.33333333	0.9742	1.1592	0.8228	0.4909	2.619	0.1894	0.9854	1.099766667	0.158416088	0.858540538	1	no	-	PREDICTED: homeobox expressed in ES cells 1-A-like [Sinocyclocheilus anshuiensis]	-	-	-	-
Unigene0000789	1.333333333	2.666666667	0	0	0.2652	0.1088	0.0595	0.2799	0.0884	0.1494	0.757061873	0.711041642	1	no	-	PREDICTED: IgGFc-binding protein-like [Cyprinus carpio]	-	-	-	-
Unigene0000790	64.33333333	62.33333333	1.3816	1.2002	1.5422	0.994	1.3252	1.2088	1.374666667	1.176	-0.225193772	0.661067623	1	no	pol	PREDICTED: uncharacterized protein LOC109098236 [Cyprinus carpio]	-	-	-	-
Unigene0000791	1030.333333	1124	4.7453	4.5938	7.3499	4.7632	5.3926	5.8294	5.563	5.3284	-0.062160717	0.878859516	1	no	pol	PREDICTED: uncharacterized protein LOC109070003 [Cyprinus carpio]	-	-	-	-
Unigene0000792	89.33333333	39	1.1003	2.5045	0.4979	0.7379	0.3317	0.5152	1.367566667	0.528266667	-1.372272879	0.03462614	1	no	inaW	PREDICTED: extensin-1-like [Nannospalax galili]	-	-	-	-
Unigene0000793	14.33333333	11.66666667	0.711	1.5575	1.566	1.5869	0.6616	0.4666	1.278166667	0.905033333	-0.498033135	0.502469244	1	no	-	--	-	-	-	-
Unigene0000794	44	48.66666667	2.2961	3.327	1.3836	1.6798	3.4782	1.822	2.335566667	2.326666667	-0.00550809	1	1	no	hba1	PREDICTED: hemoglobin embryonic subunit alpha-like [Sinocyclocheilus rhinocerous]	-	GO:0032991//macromolecular complex;GO:0043234//protein complex	GO:0022892//substrate-specific transporter activity;GO:0005215//transporter activity;GO:0046906//tetrapyrrole binding;GO:0046872//metal ion binding;GO:0043167//ion binding;GO:1901363//heterocyclic compound binding;GO:0005488//binding;GO:0097159//organic cyclic compound binding;GO:0046914//transition metal ion binding;GO:0043169//cation binding	GO:1902578//single-organism localization;GO:0044765//single-organism transport;GO:0051234//establishment of localization;GO:0006810//transport;GO:0015669//gas transport;GO:0044699//single-organism process;GO:0051179//localization
Unigene0000795	579.3333333	561	8.8229	10.9336	8.3241	7.3916	8.9769	7.7477	9.3602	8.038733333	-0.219571163	0.586909695	1	no	-	--	-	-	-	-
Unigene0000796	0.333333333	0.666666667	0.1157	0	0	0	0	0.2024	0.038566667	0.067466667	0.806820426	1	1	no	-	--	-	-	-	-
Unigene0000797	228.3333333	170	1.469	4.4053	1.4003	1.6501	1.6863	1.5011	2.424866667	1.6125	-0.588606261	0.271540325	1	no	-	--	-	-	-	-
Unigene0000798	291.3333333	211.6666667	9.4932	8.7387	14.319	5.9986	4.984	9.6633	10.8503	6.881966667	-0.656842123	0.162486262	1	no	-	PREDICTED: uncharacterized protein LOC109201215 isoform X3 [Oreochromis niloticus]	-	-	-	-
Unigene0000799	448	467.6666667	3.3731	3.6487	2.8563	2.6554	3.6722	2.8355	3.2927	3.054366667	-0.10839781	0.793140805	1	no	abhd11	PREDICTED: protein ABHD11 isoform X1 [Sinocyclocheilus anshuiensis]	-	-	-	-
Unigene0000800	62.33333333	56	0.6445	0.715	1.4759	0.8029	0.53	0.8786	0.945133333	0.737166667	-0.358527033	0.529973179	1	no	-	pol-like protein [Danio rerio]	-	-	-	-
Unigene0000801	25.66666667	27.66666667	1.4279	0.852	1.289	1.214	0.5572	1.5717	1.189633333	1.1143	-0.094379279	0.905198644	1	no	-	--	-	-	-	-
Unigene0000802	1.333333333	2	0	0.0684	0.0728	0.0896	0	0.0922	0.047066667	0.0606	0.364612111	0.82839841	1	no	-	PREDICTED: zonadhesin-like [Sinocyclocheilus grahami]	-	-	-	-
Unigene0000803	0.666666667	0	0	0	0.156	0	0	0	0.052	0.001	-5.700439718	0.561675487	1	no	-	PREDICTED: zonadhesin-like [Sinocyclocheilus grahami]	-	-	-	-
Unigene0000804	0	0	0	0	0	0	0	0	0.001	0.001	0	notest	notest	notest	-	PREDICTED: zonadhesin-like [Sinocyclocheilus grahami]	-	-	-	-
Unigene0000805	0.666666667	0	0	0	0.0804	0	0	0	0.0268	0.001	-4.744161096	0.561683171	1	no	-	PREDICTED: zonadhesin-like [Sinocyclocheilus grahami]	-	-	-	-
Unigene0000806	2068.333333	2250.666667	9.9767	8.4755	10.5771	9.3888	7.9017	10.4111	9.676433333	9.233866667	-0.067540477	0.858035332	1	no	C2CD2	PREDICTED: C2 domain-containing protein 2-like isoform X2 [Sinocyclocheilus rhinocerous]	-	-	-	-
Unigene0000807	49	42.33333333	3.2588	1.7305	3.8075	2.1662	1.9297	2.5402	2.932266667	2.212033333	-0.406643185	0.467383218	1	no	-	--	-	-	-	-
Unigene0000808	23	14.66666667	0.8195	0.9429	0.8108	0.5384	0.416	0.4889	0.857733333	0.4811	-0.834192389	0.174704892	1	no	-	PREDICTED: scavenger receptor cysteine-rich type 1 protein M130-like [Sinocyclocheilus grahami]	-	-	-	-
Unigene0000809	10.33333333	16	0.6344	0.3603	0.6575	0.5843	0.6395	1.0176	0.550733333	0.747133333	0.440011798	0.536270995	1	no	-	reverse transcriptase [Danio rerio]	-	-	-	-
Unigene0000810	2788.333333	3756.333333	8.3592	9.4759	7.3742	8.852	12.5231	8.8271	8.4031	10.0674	0.260697584	0.490064467	1	no	NAV2	PREDICTED: neuron navigator 2-like [Sinocyclocheilus anshuiensis]	-	-	-	-
Unigene0000811	78.66666667	53.33333333	1.955	2.011	4.8556	1.7249	1.27	2.1946	2.940533333	1.729833333	-0.765444802	0.178227792	1	no	rpl36	PREDICTED: 60S ribosomal protein L36 [Astyanax mexicanus]	ko03010//Ribosome//Translation//Genetic Information Processing	GO:0030529//intracellular ribonucleoprotein complex;GO:0032991//macromolecular complex;GO:1990904//ribonucleoprotein complex;GO:0005623//cell;GO:0044424//intracellular part;GO:0044464//cell part;GO:0005622//intracellular	-	GO:0048856//anatomical structure development;GO:0048731//system development;GO:0007399//nervous system development;GO:0071704//organic substance metabolic process;GO:0007049//cell cycle;GO:0044707//single-multicellular organism process;GO:0007417//central nervous system development;GO:0009987//cellular process;GO:0032501//multicellular organismal process;GO:0007275//multicellular organism develop…
Unigene0000812	7660.333333	7807.666667	52.1284	41.6109	64.6389	46.7524	38.7728	55.6475	52.79273333	47.05756667	-0.165912642	0.657856988	1	no	Ttll4	tubulin polyglutamylase TTLL4 [Chanodichthys ilishaeformis]	-	-	-	GO:0043412//macromolecule modification;GO:0036211//protein modification process;GO:0043170//macromolecule metabolic process;GO:0044238//primary metabolic process;GO:0019538//protein metabolic process;GO:0071704//organic substance metabolic process;GO:0008152//metabolic process
Unigene0000813	5.666666667	5	0.0719	0.2449	0.298	0.1222	0.3678	0	0.204933333	0.163333333	-0.327335416	0.7997438	1	no	-	--	-	-	-	-
Unigene0000814	4	5.333333333	0.4231	0.1648	0.4385	0.3597	0.7086	0.1481	0.342133333	0.405466667	0.245024646	0.910809282	1	no	-	--	-	-	-	-
Unigene0000815	17	16.33333333	1.1824	0.2763	0.9804	0.4021	0.7042	0.9517	0.813033333	0.686	-0.245105926	0.745414599	1	no	-	PREDICTED: uncharacterized protein LOC108180325 [Danio rerio]	-	-	-	-
Unigene0000816	6.666666667	20.66666667	0	0.3088	0.3288	0.1079	0.9445	0.7215	0.212533333	0.5913	1.476201148	0.137619554	1	no	-	PREDICTED: LOW QUALITY PROTEIN: tetra-peptide repeat homeobox protein 1-like [Coturnix japonica]	-	-	-	-
Unigene0000817	10.33333333	17	0.6715	0.9442	0.6959	1.2052	1.5967	0.5875	0.770533333	1.1298	0.552138131	0.454635284	1	no	-	--	-	-	-	-
Unigene0000818	34.33333333	60	1.2004	0.547	0.9	0.7166	2.2578	1.162	0.882466667	1.3788	0.643799514	0.29473642	1	no	nadX	PREDICTED: putative L-aspartate dehydrogenase isoform X1 [Cyprinus carpio]	-	-	GO:0000166//nucleotide binding;GO:0016638//oxidoreductase activity, acting on the CH-NH2 group of donors;GO:0097159//organic cyclic compound binding;GO:0036094//small molecule binding;GO:0016491//oxidoreductase activity;GO:1901265//nucleoside phosphate binding;GO:1901363//heterocyclic compound binding;GO:0003824//catalytic activity;GO:0005488//binding	GO:0046496//nicotinamide nucleotide metabolic process;GO:1901564//organonitrogen compound metabolic process;GO:0008152//metabolic process;GO:0009165//nucleotide biosynthetic process;GO:1901362//organic cyclic compound biosynthetic process;GO:0018130//heterocycle biosynthetic process;GO:0006739//NADP metabolic process;GO:0090407//organophosphate biosynthetic process;GO:0019359//nicotinamide nucleo…
Unigene0000819	56.33333333	120.3333333	1.0251	0.8342	0.7295	0.6504	3.9296	0.4685	0.862933333	1.682833333	0.963571288	0.185793838	1	no	CDHR5	PREDICTED: cadherin-related family member 5-like [Sinocyclocheilus anshuiensis]	-	-	-	-
Unigene0000820	42.33333333	52.66666667	1.3296	1.2245	2.0486	1.1305	1.8058	2.1066	1.534233333	1.680966667	0.131773205	0.823794107	1	no	-	--	-	-	-	-
Unigene0000821	45.33333333	30.33333333	4.569	4.2974	1.6053	1.7778	2.7384	1.7617	3.490566667	2.092633333	-0.738141718	0.221258864	1	no	-	--	-	-	-	-
Unigene0000822	393.3333333	429	2.7707	2.6282	3.019	2.4342	2.7501	2.909	2.805966667	2.697766667	-0.056732298	0.8907237	1	no	NCAM2	PREDICTED: neural cell adhesion molecule 2-like [Sinocyclocheilus rhinocerous]	ko04514//Cell adhesion molecules (CAMs)//Signaling molecules and interaction//Environmental Information Processing	-	-	-
Unigene0000823	155.6666667	146.6666667	2.9025	2.4911	3.5823	2.2405	3.1984	2.0382	2.991966667	2.492366667	-0.263577775	0.580002458	1	no	tmem120a	PREDICTED: transmembrane protein 120A-like [Sinocyclocheilus grahami]	-	-	-	-
Unigene0000824	540	340.3333333	8.0657	7.349	5.5197	3.6376	4.8833	3.2118	6.978133333	3.9109	-0.835340516	0.048716156	1	no	Trim35	PREDICTED: tripartite motif-containing protein 35-like isoform X1 [Sinocyclocheilus anshuiensis]	-	-	-	-
Unigene0000825	52.66666667	52.33333333	1.3898	1.3786	1.3861	1.2485	1.7569	0.6653	1.384833333	1.223566667	-0.178619647	0.764520515	1	no	-	--	-	-	-	-
Unigene0000826	0	0	0	0	0	0	0	0	0.001	0.001	0	notest	notest	notest	-	--	-	-	-	-
Unigene0000827	86.66666667	125.6666667	1.7279	4.0025	1.9762	2.5836	4.4356	2.9976	2.568866667	3.338933333	0.378255277	0.481284723	1	no	-	--	-	-	-	-
Unigene0000828	11.33333333	6.666666667	0.452	1.32	1.3117	0.3843	0.9252	0.3163	1.0279	0.541933333	-0.923512625	0.272177263	1	no	-	--	-	-	-	-
Unigene0000829	31	37.33333333	0.8994	1.0869	0.9	0.8965	1.3564	0.8412	0.9621	1.031366667	0.100298564	0.877288043	1	no	SPOCK2	PREDICTED: testican-2-like isoform X2 [Sinocyclocheilus anshuiensis]	-	-	-	-
Unigene0000830	0.666666667	3.333333333	0.0499	0	0	0.0848	0.1392	0	0.016633333	0.074666667	2.166387012	0.212704747	1	no	FAM19A4	PREDICTED: protein FAM19A4-like isoform X1 [Sinocyclocheilus anshuiensis]	-	-	-	-
Unigene0000831	299	396.3333333	1.3545	1.7125	0.9987	1.5419	1.9709	1.2885	1.355233333	1.600433333	0.239921317	0.586019983	1	no	RYR3	PREDICTED: ryanodine receptor 3-like [Sinocyclocheilus anshuiensis]	ko04020//Calcium signaling pathway//Signal transduction//Environmental Information Processing	-	-	-
Unigene0000832	34.33333333	38.33333333	3.4319	2.5421	1.7012	3.3619	3.0546	1.1749	2.5584	2.530466667	-0.015838374	1	1	no	-	--	-	-	-	-
Unigene0000833	28259.33333	30513.33333	166.0065	159.7775	222.1519	178.1635	132.274	206.6477	182.6453	172.3617333	-0.083605117	0.822909399	1	no	Caprin1	PREDICTED: caprin-1-like isoform X1 [Sinocyclocheilus rhinocerous]	-	-	-	-
Unigene0000834	3	8	0	0.5056	0.2691	0.1472	0.2416	1.4388	0.258233333	0.6092	1.238240703	0.370732022	1	no	-	--	-	-	-	-
Unigene0000835	1007.666667	1319.666667	3.9838	3.1	3.6071	3.6866	4.1201	4.5334	3.563633333	4.113366667	0.206970776	0.595808365	1	no	PTPRZ1	PREDICTED: receptor-type tyrosine-protein phosphatase zeta-like [Sinocyclocheilus anshuiensis]	-	-	-	-
Unigene0000836	3	6.333333333	0.1814	0.4415	0.188	0.2314	0.844	0.4761	0.2703	0.517166667	0.936067779	0.421403959	1	no	-	--	-	-	-	-
Unigene0000837	15.33333333	5.333333333	1.7956	0.5244	1.8611	0	0.0835	1.1783	1.3937	0.4206	-1.728399293	0.115896574	1	no	-	--	-	-	-	-
Unigene0000838	18	19.33333333	1.3858	1.1993	1.596	0.851	1.5761	1.5493	1.3937	1.325466667	-0.072419659	0.932964549	1	no	-	--	-	-	-	-
Unigene0000839	4.666666667	8.666666667	0.2171	0.2113	1.125	1.1075	1.2121	0.1899	0.5178	0.8365	0.691970575	0.494262003	1	no	-	--	-	-	-	-
Unigene0000840	1106.333333	1386	6.3735	6.8638	4.4187	5.7768	7.8795	6.0332	5.885333333	6.563166667	0.157267941	0.696828313	1	no	CCNT1	PREDICTED: cyclin-T1-like isoform X1 [Sinocyclocheilus grahami]	-	-	-	GO:0065007//biological regulation;GO:0006807//nitrogen compound metabolic process;GO:0006725//cellular aromatic compound metabolic process;GO:0034654//nucleobase-containing compound biosynthetic process;GO:0046483//heterocycle metabolic process;GO:0010467//gene expression;GO:1901360//organic cyclic compound metabolic process;GO:0071704//organic substance metabolic process;GO:0006139//nucleobase-c…
Unigene0000841	13	10.66666667	0.8487	0.3787	0.1466	0.451	0.1974	0.3403	0.458	0.329566667	-0.474777267	0.596308137	1	no	-	--	-	-	-	-
Unigene0000842	43.33333333	25.33333333	0.9925	0.5797	2.1749	0.9403	0.2375	0.6947	1.249033333	0.624166667	-1.000808761	0.150545959	1	no	-	--	-	-	-	-
Unigene0000843	2.333333333	4.666666667	0.1808	0.352	0.0937	1.076	0	0	0.208833333	0.358666667	0.780291663	0.622878676	1	no	-	--	-	-	-	-
Unigene0000844	249.6666667	304	3.1677	2.8835	2.5247	3.1308	2.7455	3.3218	2.858633333	3.066033333	0.101047799	0.813873806	1	no	Igsf5	PREDICTED: immunoglobulin superfamily member 5-like [Sinocyclocheilus rhinocerous]	ko04530//Tight junction//Cellular commiunity//Cellular Processes	-	-	-
Unigene0000845	650	507	9.1849	4.5608	10.4758	4.9134	3.5469	7.9716	8.073833333	5.4773	-0.559788905	0.240876666	1	no	-	--	-	-	-	-
Unigene0000846	25.66666667	15.66666667	1.1685	0.4875	2.7105	0.3785	1.1908	0.7789	1.4555	0.782733333	-0.89492205	0.244366692	1	no	-	PREDICTED: astrotactin-2-like [Sinocyclocheilus grahami]	-	-	-	-
Unigene0000847	70.66666667	100.3333333	1.1616	1.7771	0.5504	1.3827	2.0538	1.0163	1.163033333	1.484266667	0.351857867	0.537621451	1	no	zgc:171711	PREDICTED: repressor of yield of DENV protein homolog [Sinocyclocheilus rhinocerous]	-	-	-	-
Unigene0000848	313	314.3333333	2.3085	2.9181	1.6331	1.4331	2.6391	2.0903	2.286566667	2.054166667	-0.154629742	0.736021765	1	no	-	PREDICTED: titin-like [Sinocyclocheilus anshuiensis]	-	-	-	-
Unigene0000849	4	1.666666667	0.6019	0.1172	0.7487	0.2047	0.112	0.2107	0.489266667	0.1758	-1.476685926	0.266891169	1	no	-	--	-	-	-	-
Unigene0000850	0	0.666666667	0	0	0	0	0	0.1028	0.001	0.034266667	5.098733954	0.559444141	1	no	-	--	-	-	-	-
Unigene0000851	3	5	0.1164	0.3967	0	0.3464	0.4333	0	0.171033333	0.2599	0.603679109	0.694411606	1	no	-	--	-	-	-	-
Unigene0000852	22.33333333	24.33333333	0.355	0.8987	0.3189	0.4025	0.6387	0.497	0.5242	0.512733333	-0.031908662	0.974029986	1	no	-	PREDICTED: interleukin-15 receptor subunit alpha isoform X1 [Sinocyclocheilus rhinocerous]	ko04060//Cytokine-cytokine receptor interaction//Signaling molecules and interaction//Environmental Information Processing;ko04630//Jak-STAT signaling pathway//Signal transduction//Environmental Information Processing;ko04672//Intestinal immune network for IgA production//Immune system//Organismal Systems	-	-	-
Unigene0000853	1560	2191.666667	12.2714	10.7634	10.7136	15.7542	16.3387	9.8052	11.24946667	13.96603333	0.312065716	0.427058893	1	no	Sapcd2	suppressor APC domain-containing protein 2 [Danio rerio]	-	-	-	-
Unigene0000854	22318.33333	26146.66667	149.7323	163.4539	149.3053	188.2007	163.1617	126.1427	154.1638333	159.1683667	0.046089291	0.898894037	1	no	cct3	PREDICTED: T-complex protein 1 subunit gamma-like [Sinocyclocheilus grahami]	-	GO:0044464//cell part;GO:0005623//cell;GO:0005622//intracellular;GO:0044424//intracellular part	GO:0005515//protein binding;GO:0001883//purine nucleoside binding;GO:0005488//binding;GO:0032549//ribonucleoside binding;GO:0036094//small molecule binding;GO:0097367//carbohydrate derivative binding;GO:0032550//purine ribonucleoside binding;GO:1901363//heterocyclic compound binding;GO:0001882//nucleoside binding;GO:0097159//organic cyclic compound binding	GO:0050789//regulation of biological process;GO:0044238//primary metabolic process;GO:0010941//regulation of cell death;GO:0065007//biological regulation;GO:0043170//macromolecule metabolic process;GO:0043067//regulation of programmed cell death;GO:0044699//single-organism process;GO:0009987//cellular process;GO:0008152//metabolic process;GO:0048731//system development;GO:0044707//single-multicel…
Unigene0000855	16.33333333	25	0.3719	0.7643	0.8993	1.0188	0.9612	0.7592	0.6785	0.913066667	0.428371385	0.509675734	1	no	-	PREDICTED: trichohyalin-like [Sinocyclocheilus rhinocerous]	-	-	-	-
Unigene0000856	1534.333333	1312.666667	31.9199	110.9957	42.2487	43.5191	71.0297	28.1761	61.72143333	47.57496667	-0.37556892	0.47106908	1	no	Tmsb4x	thymosin beta a [Cyprinus carpio]	ko04810//Regulation of actin cytoskeleton//Cell motility//Cellular Processes	GO:0005622//intracellular;GO:0044464//cell part;GO:0005623//cell;GO:0044424//intracellular part	GO:0005488//binding;GO:0008092//cytoskeletal protein binding;GO:0005515//protein binding	GO:0030837//negative regulation of actin filament polymerization;GO:0031333//negative regulation of protein complex assembly;GO:0032956//regulation of actin cytoskeleton organization;GO:0032271//regulation of protein polymerization;GO:0030832//regulation of actin filament length;GO:0051493//regulation of cytoskeleton organization;GO:0065007//biological regulation;GO:0071840//cellular component or…
Unigene0000857	14	10.66666667	0.6586	0.5038	0.8289	0.44	0.2189	0.6585	0.663766667	0.439133333	-0.596017132	0.428494913	1	no	MOG	PREDICTED: butyrophilin subfamily 1 member A1-like [Cyprinus carpio]	-	-	-	-
Unigene0000858	1299.333333	1561	13.2101	9.4311	13.7208	14.4315	10.4809	13.2774	12.12066667	12.72993333	0.070755811	0.858169179	1	no	HNRNPUL1	PREDICTED: heterogeneous nuclear ribonucleoprotein U-like protein 2 isoform X1 [Sinocyclocheilus rhinocerous]	-	-	-	-
Unigene0000859	0.666666667	0.666666667	0.1308	0	0	0.1112	0	0	0.0436	0.037066667	-0.234205753	1	1	no	-	--	-	-	-	-
Unigene0000860	116.6666667	129	4.3631	5.0675	3.9669	4.0025	5.8408	3.3486	4.465833333	4.3973	-0.022311448	0.967507531	1	no	-	--	-	-	-	-
Unigene0000861	120.3333333	38	2.2266	0.2395	2.04	0.1883	0.435	0.6242	1.502033333	0.415833333	-1.852839515	0.013413295	1	no	-	--	-	-	-	-
Unigene0000862	71.33333333	117.6666667	2.3497	2.4853	1.353	2.4664	3.7521	2.8934	2.062666667	3.0373	0.558278717	0.27814083	1	no	-	--	-	-	-	-
Unigene0000863	27.33333333	33.33333333	0.3916	1.4775	0.1015	1.0822	1.0478	0.0428	0.656866667	0.724266667	0.140920422	0.907679889	1	no	-	--	-	-	-	-
Unigene0000864	1127.666667	1334	13.8383	16.9526	12.537	14.5437	17.8013	13.1614	14.44263333	15.1688	0.070773145	0.858266609	1	no	ZFAND5	PREDICTED: AN1-type zinc finger protein 5-like isoform X1 [Sinocyclocheilus anshuiensis]	-	-	GO:0043167//ion binding;GO:0046914//transition metal ion binding;GO:0005488//binding;GO:0046872//metal ion binding;GO:0043169//cation binding	-
Unigene0000865	13	12.66666667	0.5355	0.1896	1.2111	0.3311	0.6796	0.6389	0.6454	0.549866667	-0.231111746	0.808625033	1	no	-	--	-	-	-	-
Unigene0000866	184.6666667	193	2.8274	3.525	1.5998	3.1275	2.886	1.3757	2.650733333	2.463066667	-0.105935864	0.84110755	1	no	-	--	-	-	-	-
Unigene0000867	46.33333333	20.66666667	1.4214	1.0449	1.5935	0.444	0.2429	0.8883	1.353266667	0.525066667	-1.365873641	0.031468342	1	no	-	--	-	-	-	-
Unigene0000868	170	149.6666667	2.1502	1.4936	2.1009	1.3616	1.6256	1.4697	1.9149	1.485633333	-0.366190963	0.425819219	1	no	-	PREDICTED: uncharacterized protein LOC103909920 [Danio rerio]	-	-	-	-
Unigene0000869	49.66666667	37.33333333	0.6564	1.3471	0.6251	0.4826	1.0565	0.2483	0.8762	0.5958	-0.556432091	0.398382972	1	no	Sowahc	PREDICTED: ankyrin repeat domain-containing protein SOWAHD-like [Sinocyclocheilus rhinocerous]	-	-	-	-
Unigene0000870	2.333333333	2.666666667	0	0.0699	0.4464	0.1831	0.0668	0.2512	0.1721	0.167033333	-0.04311106	1	1	no	-	--	-	-	-	-
Unigene0000871	21.66666667	16.66666667	2.5896	1.146	4.0262	0.9007	0.3286	3.9136	2.587266667	1.7143	-0.593809158	0.486114456	1	no	-	--	-	-	-	-
Unigene0000872	32.33333333	40	1.9561	0.7617	1.0948	2.3948	0.5097	1.1638	1.270866667	1.3561	0.09365089	0.887118994	1	no	-	--	-	-	-	-
Unigene0000873	135	222	2.5779	1.6732	1.9881	2.3745	3.3412	3.3564	2.079733333	3.024033333	0.540075487	0.244009549	1	no	-	PREDICTED: LOW QUALITY PROTEIN: scavenger receptor cysteine-rich domain-containing group B protein-like [Chrysemys picta bellii]	-	-	-	-
Unigene0000874	468.3333333	881	5.8691	7.0142	6.0971	11.8843	10.8725	8.7472	6.3268	10.50133333	0.73102462	0.071610202	1	no	-	--	-	-	-	-
Unigene0000875	6672	5726.333333	140.8201	306.4027	67.0519	148.9427	172.7344	74.9752	171.4249	132.2174333	-0.374664267	0.470515892	1	no	tmsb	PREDICTED: thymosin beta-4 [Pygocentrus nattereri]	ko04810//Regulation of actin cytoskeleton//Cell motility//Cellular Processes	GO:0005737//cytoplasm;GO:0044464//cell part;GO:0044424//intracellular part;GO:0005622//intracellular;GO:0005623//cell	GO:0005515//protein binding;GO:0005488//binding;GO:0008092//cytoskeletal protein binding	GO:0071840//cellular component organization or biogenesis;GO:0051494//negative regulation of cytoskeleton organization;GO:0050789//regulation of biological process;GO:0051128//regulation of cellular component organization;GO:0010639//negative regulation of organelle organization;GO:0030832//regulation of actin filament length;GO:0044763//single-organism cellular process;GO:0048523//negative regul…
Unigene0000876	95.33333333	114.3333333	3.0951	1.2483	2.0164	1.7669	2.2218	2.7273	2.119933333	2.238666667	0.078620833	0.886926657	1	no	-	PREDICTED: oxysterol-binding protein-related protein 5 isoform X1 [Esox lucius]	-	-	-	-
Unigene0000877	164	166	14.7823	10.1189	13.167	12.241	10.8181	10.7779	12.6894	11.279	-0.169984691	0.714151824	1	no	-	--	-	-	-	-
Unigene0000878	0	0	0	0	0	0	0	0	0.001	0.001	0	notest	notest	notest	-	PREDICTED: calcium/calmodulin-dependent protein kinase type IV-like [Pseudopodoces humilis]	ko04020//Calcium signaling pathway//Signal transduction//Environmental Information Processing	-	-	-
Unigene0000879	253	286.6666667	3.1202	5.2699	2.5721	3.7263	4.2538	3.0854	3.654066667	3.6885	0.01353128	0.981323368	1	no	-	ADP-ribosylation factor GTPase-activating protein 1-like [Scleropages formosus]	-	-	-	-
Unigene0000880	290.6666667	356.3333333	5.5859	7.2947	3.8531	7.4842	6.5063	4.1963	5.5779	6.062266667	0.120135245	0.794933372	1	no	ALKBH4	PREDICTED: alpha-ketoglutarate-dependent dioxygenase alkB homolog 4-like [Sinocyclocheilus rhinocerous]	-	-	GO:0003824//catalytic activity	GO:0044699//single-organism process;GO:0008152//metabolic process;GO:0044710//single-organism metabolic process
Unigene0000881	9.333333333	10.33333333	0.7106	0.3144	0.8034	0.4394	0.6612	0.6782	0.609466667	0.592933333	-0.039677414	1	1	no	-	PREDICTED: uncharacterized protein si:ch211-12e13.10 [Danio rerio]	-	-	-	-
Unigene0000882	29.66666667	26	1.3431	1.7259	1.7261	1.0505	1.7997	0.8931	1.598366667	1.247766667	-0.357250227	0.551661114	1	no	-	--	-	-	-	-
Unigene0000883	2638	2748	14.729	10.6038	18.0266	13.1699	10.4185	15.8541	14.45313333	13.1475	-0.136593796	0.729652261	1	no	CSNK1G1	PREDICTED: casein kinase I-like isoform X2 [Sinocyclocheilus grahami]	ko04340//Hedgehog signaling pathway//Signal transduction//Environmental Information Processing	GO:0005623//cell;GO:0005622//intracellular;GO:0044464//cell part;GO:0044424//intracellular part	GO:0097367//carbohydrate derivative binding;GO:0036094//small molecule binding;GO:0003824//catalytic activity;GO:0004672//protein kinase activity;GO:0032549//ribonucleoside binding;GO:0001882//nucleoside binding;GO:0016772//transferase activity, transferring phosphorus-containing groups;GO:1901363//heterocyclic compound binding;GO:0016301//kinase activity;GO:0005488//binding;GO:0016773//phosphotr…	GO:0044238//primary metabolic process;GO:0007154//cell communication;GO:0044700//single organism signaling;GO:0044237//cellular metabolic process;GO:0044763//single-organism cellular process;GO:0019538//protein metabolic process;GO:0007166//cell surface receptor signaling pathway;GO:0023052//signaling;GO:0006464//cellular protein modification process;GO:0065007//biological regulation;GO:0043412//…
Unigene0000884	652	734.6666667	9.2862	7.1662	6.5464	8.7837	6.9479	7.0668	7.666266667	7.599466667	-0.012626009	0.976584837	1	no	-	--	-	-	-	-
Unigene0000885	3.333333333	5.666666667	0.6909	0.2242	0.2387	0.8811	0.1072	0.7053	0.3846	0.564533333	0.553700006	0.663437925	1	no	-	--	-	-	-	-
Unigene0000886	38.33333333	43.66666667	1.2883	1.1435	1.9636	1.1597	1.5513	1.6907	1.465133333	1.467233333	0.002066358	1	1	no	-	--	-	-	-	-
Unigene0000887	9	10.66666667	0.6939	0.9008	1.5584	0.9833	1.3991	0.9107	1.051033333	1.0977	0.062675397	1	1	no	-	--	-	-	-	-
Unigene0000888	37.33333333	26.66666667	0.7142	0.9561	1.6964	0.4048	0.803	0.9113	1.122233333	0.706366667	-0.667883501	0.274535268	1	no	-	--	-	-	-	-
Unigene0000889	6.333333333	5.666666667	0.4786	0.233	0.8268	0.6783	0.3712	0.1396	0.5128	0.396366667	-0.371560621	0.785039254	1	no	-	--	-	-	-	-
Unigene0000890	15	18.66666667	1.9429	1.4933	1.1659	1.2172	1.6176	2.2367	1.534033333	1.6905	0.140120184	0.854816527	1	no	-	--	-	-	-	-
Unigene0000891	6	5	0.9249	0.4093	0.1743	1.0008	0	0.0736	0.502833333	0.358133333	-0.489583487	0.769207602	1	no	-	--	-	-	-	-
Unigene0000892	54.66666667	51.66666667	2.9033	2.5958	4.2988	2.6699	3.5838	1.9181	3.265966667	2.723933333	-0.261818672	0.637876914	1	no	-	--	-	-	-	-
Unigene0000893	412.6666667	431.3333333	25.5834	16.0742	28.6777	21.9912	12.5848	29.3354	23.4451	21.3038	-0.138175643	0.767388234	1	no	-	--	-	-	-	-
Unigene0000894	84	66.33333333	2.3886	1.7554	1.7718	1.3539	1.2203	1.5366	1.971933333	1.370266667	-0.525154096	0.29190558	1	no	-	--	-	-	-	-
Unigene0000895	955.3333333	695	7.0809	12.9534	12.7963	6.5253	7.8431	6.7449	10.94353333	7.037766667	-0.636889027	0.130668986	1	no	SERPINB1	PREDICTED: leukocyte elastase inhibitor-like [Sinocyclocheilus rhinocerous]	-	GO:0005576//extracellular region;GO:0044421//extracellular region part	-	-
Unigene0000896	150	124.6666667	10.0929	9.1291	13.2062	6.938	7.4602	9.269	10.8094	7.889066667	-0.454359911	0.333513709	1	no	-	--	-	-	-	-
Unigene0000897	86.66666667	76.33333333	3.3533	4.3159	7.2457	2.996	2.6972	5.7683	4.971633333	3.8205	-0.379958439	0.497321244	1	no	-	--	-	-	-	-
Unigene0000898	692	643.6666667	20.1594	13.2805	24.1445	15.0823	11.6444	19.9962	19.1948	15.5743	-0.301548207	0.489029353	1	no	-	--	-	-	-	-
Unigene0000899	15	11	1.0249	0.105	1.3418	0.5045	0.4016	0.6607	0.8239	0.522266667	-0.657682615	0.442370246	1	no	-	--	-	-	-	-
Unigene0000900	8118	27377	136.0192	3.0398	30.932	82.7103	293.6833	137.3595	56.66366667	171.2510333	1.595616828	0.060451548	1	no	ITIH3	PREDICTED: inter-alpha-trypsin inhibitor heavy chain H3-like isoform X1 [Sinocyclocheilus anshuiensis]	-	-	-	-
Unigene0000901	16	19.66666667	1.0761	1.2223	0.5577	1.7283	1.0014	0.3662	0.952033333	1.031966667	0.116312379	0.907579797	1	no	-	PREDICTED: piggyBac transposable element-derived protein 3-like [Lates calcarifer]	-	-	-	-
Unigene0000902	9.666666667	12	0.711	0.2884	0.7369	0.7556	0.5513	0.5702	0.578766667	0.6257	0.11248927	0.897740679	1	no	-	--	-	-	-	-
Unigene0000903	3	3	0.3204	0.2079	0.4428	0.2724	0	0.5606	0.3237	0.277666667	-0.221303371	0.884039264	1	no	-	--	-	-	-	-
Unigene0000904	34.33333333	12.66666667	4.3537	2.2959	2.7263	2.005	1.0128	0	3.1253	1.005933333	-1.635459986	0.054001779	1	no	-	--	-	-	-	-
Unigene0000905	8.333333333	16.33333333	0.7752	0.5031	0.3348	0.4394	1.5028	0.9043	0.5377	0.948833333	0.819353222	0.297473971	1	no	-	--	-	-	-	-
Unigene0000906	41.33333333	59.66666667	1.243	1.0239	0.6937	1.7681	0.6673	1.2967	0.986866667	1.244033333	0.334098059	0.572550716	1	no	-	--	-	-	-	-
Unigene0000907	37.33333333	54	1.7309	0.7222	0.6265	1.6118	0.6136	1.6586	1.026533333	1.294666667	0.334800225	0.604116474	1	no	-	--	-	-	-	-
Unigene0000908	10.66666667	5.666666667	0.4474	1.3066	1.1129	0.3043	0.9159	0.1566	0.955633333	0.458933333	-1.05817258	0.22895228	1	no	-	--	-	-	-	-
Unigene0000909	29.33333333	36.33333333	2.0535	1.3841	1.2006	1.5221	2.1558	1.4281	1.546066667	1.702	0.138628507	0.833777602	1	no	-	--	-	-	-	-
Unigene0000910	1011	1275.333333	8.5248	11.1237	7.3832	7.3998	11.9198	11.0591	9.010566667	10.12623333	0.168407889	0.682376577	1	no	cipc	PREDICTED: CLOCK-interacting pacemaker [Sinocyclocheilus rhinocerous]	-	-	-	-
Unigene0000911	11	22.66666667	0.5687	1.2655	0.8421	0.5526	1.2852	3.0565	0.8921	1.631433333	0.870862691	0.260003159	1	no	-	--	-	-	-	-
Unigene0000912	18	3	0.3664	1.9364	0.4883	0.0445	0.1948	0.1832	0.930366667	0.140833333	-2.723810568	0.003487758	0.706582819	no	Mpeg1	PREDICTED: macrophage-expressed gene 1 protein-like [Cyprinus carpio]	-	-	-	-
Unigene0000913	851	1012	10.9314	15.9569	6.8284	13.8678	14.0159	7.8326	11.2389	11.90543333	0.083119293	0.855614005	1	no	Triobp	PREDICTED: TRIO and F-actin-binding protein-like isoform X2 [Danio rerio]	-	-	-	-
Unigene0000914	32.66666667	27	0.148	2.2471	0.4601	0.3522	1.5145	0.3107	0.951733333	0.7258	-0.390985344	0.676710108	1	no	-	--	-	-	-	-
Unigene0000915	306.3333333	367	21.1485	17.5104	22.1931	24.5347	23.4804	16.1401	20.284	21.38506667	0.076261525	0.86051065	1	no	-	--	-	-	-	-
Unigene0000916	1909	2131	41.7762	48.3153	41.1411	47.6054	41.7286	39.8159	43.7442	43.04996667	-0.023079624	0.951181692	1	no	fam162b	PREDICTED: protein FAM162B-like [Sinocyclocheilus rhinocerous]	-	-	-	-
Unigene0000917	36.66666667	32.66666667	1.2757	0.918	0.8623	0.6838	0.9806	0.7522	1.018666667	0.805533333	-0.338665848	0.54218448	1	no	-	--	-	-	-	-
Unigene0000918	69	48.33333333	1.2055	4.936	1.1025	1.4771	2.0455	1.0547	2.414666667	1.525766667	-0.662289696	0.319134803	1	no	-	--	-	-	-	-
Unigene0000919	90.33333333	124.3333333	1.6624	3.1261	1.3454	2.885	2.6489	1.9726	2.044633333	2.502166667	0.291335743	0.578561069	1	no	-	--	-	-	-	-
Unigene0000920	35	32.33333333	1.6215	1.8417	2.2409	1.011	2.3136	1.3714	1.901366667	1.565333333	-0.280566866	0.636785797	1	no	K02A2.6	Immunoglobulin superfamily member 21, partial [Larimichthys crocea]	-	-	-	-
Unigene0000921	15.33333333	19.33333333	0.4209	0.6439	0.3116	0.8179	0.2797	0.4208	0.4588	0.506133333	0.1416521	0.866801685	1	no	P2RX7	PREDICTED: P2X purinoceptor 7-like isoform X1 [Nothobranchius furzeri]	-	-	-	-
Unigene0000922	114	103.6666667	4.6458	3.6682	4.2466	3.2036	2.6552	4.1608	4.186866667	3.339866667	-0.326080466	0.506453187	1	no	-	PREDICTED: uncharacterized protein LOC107677180 isoform X3 [Sinocyclocheilus anshuiensis]	-	-	-	-
Unigene0000923	38.66666667	41.33333333	1.0689	1.1563	2.421	1.3127	0.8473	2.1475	1.548733333	1.435833333	-0.109200461	0.873486826	1	no	-	--	-	-	-	-
Unigene0000924	259.6666667	250.6666667	2.8622	2.3666	2.4281	1.8751	2.3532	2.307	2.5523	2.178433333	-0.228506952	0.59815416	1	no	CAMK2G	PREDICTED: calcium/calmodulin-dependent protein kinase type II subunit gamma-like [Sinocyclocheilus anshuiensis]	ko04020//Calcium signaling pathway//Signal transduction//Environmental Information Processing;ko04261//Adrenergic signaling in cardiomyocytes//Circulatory system//Organismal Systems;ko04310//Wnt signaling pathway//Signal transduction//Environmental Information Processing;ko04916//Melanogenesis//Endocrine system//Organismal Systems;ko04912//GnRH signaling pathway//Endocrine system//Organismal Syst…	-	-	-
Unigene0000925	12.66666667	9.666666667	0.5252	1.3878	0.9332	0.5741	0.768	0.5908	0.948733333	0.6443	-0.558270042	0.450303274	1	no	-	--	-	-	-	-
Unigene0000926	23	16.33333333	1.7621	0.3119	1.6604	0.9988	0.2484	1.0278	1.2448	0.758333333	-0.715009921	0.366963102	1	no	-	--	-	-	-	-
Unigene0000927	64.66666667	44.66666667	3.0684	1.2054	6.3606	2.38	0.2505	3.6266	3.5448	2.0857	-0.765172572	0.339408084	1	no	-	--	-	-	-	-
Unigene0000928	115.6666667	157	2.9005	3.7496	1.5524	2.7693	3.8494	3.3282	2.734166667	3.315633333	0.278183284	0.582109998	1	no	-	--	-	-	-	-
Unigene0000929	21.66666667	17.66666667	1.4446	0.9376	0.4537	0.9677	0.4888	0.5745	0.9453	0.677	-0.481616421	0.477026318	1	no	-	--	-	-	-	-
Unigene0000930	2345.666667	2404	68.745	62.2927	84.9784	66.7504	46.8203	79.8223	72.00536667	64.46433333	-0.159603266	0.684007969	1	no	Ppp3r1	PREDICTED: calcineurin subunit B type 1-like [Sinocyclocheilus anshuiensis]	ko04010//MAPK signaling pathway//Signal transduction//Environmental Information Processing;ko04020//Calcium signaling pathway//Signal transduction//Environmental Information Processing;ko04310//Wnt signaling pathway//Signal transduction//Environmental Information Processing;ko04114//Oocyte meiosis//Cell growth and death//Cellular Processes;ko04210//Apoptosis//Cell growth and death//Cellular Proce…	GO:0044422//organelle part;GO:0043229//intracellular organelle;GO:0043226//organelle;GO:0044428//nuclear part;GO:0005737//cytoplasm;GO:0043233//organelle lumen;GO:0070013//intracellular organelle lumen;GO:0032991//macromolecular complex;GO:0044446//intracellular organelle part;GO:0031981//nuclear lumen;GO:0043234//protein complex;GO:0005634//nucleus;GO:0044464//cell part;GO:0043227//membrane-boun…	GO:0042578//phosphoric ester hydrolase activity;GO:0043169//cation binding;GO:0003824//catalytic activity;GO:0016791//phosphatase activity;GO:0016788//hydrolase activity, acting on ester bonds;GO:0004721//phosphoprotein phosphatase activity;GO:0005515//protein binding;GO:0043167//ion binding;GO:0046872//metal ion binding;GO:0004722//protein serine/threonine phosphatase activity;GO:0005488//bindin…	GO:0050896//response to stimulus;GO:0044267//cellular protein metabolic process;GO:0032502//developmental process;GO:0002768//immune response-regulating cell surface receptor signaling pathway;GO:0006952//defense response;GO:0050794//regulation of cellular process;GO:0006913//nucleocytoplasmic transport;GO:0010638//positive regulation of organelle organization;GO:0042991//transcription factor imp…
Unigene0000931	232	45.66666667	0.6604	10.845	0.3062	0.7979	0.8571	0.4562	3.9372	0.703733333	-2.484069245	0.011074146	1	no	LUM	zgc:86661, partial [Danio rerio]	-	-	-	GO:0009987//cellular process;GO:0009790//embryo development;GO:0007600//sensory perception;GO:0071840//cellular component organization or biogenesis;GO:0050877//neurological system process;GO:0050953//sensory perception of light stimulus;GO:0032502//developmental process;GO:0007275//multicellular organism development;GO:0048513//animal organ development;GO:0044767//single-organism developmental p…
Unigene0000932	39.66666667	31.33333333	3.2653	4.7684	2.7263	3.933	2.2788	1.2697	3.586666667	2.493833333	-0.524278621	0.4028367	1	no	-	--	-	-	-	-
Unigene0000933	11	7.333333333	0.3623	0.5996	0.2253	0.154	0.2697	0.2853	0.395733333	0.236333333	-0.743705464	0.354330131	1	no	-	--	-	-	-	-
Unigene0000934	131	117.3333333	0.8138	2.841	0.8676	0.5634	1.9798	1.1393	1.507466667	1.2275	-0.296403077	0.639891356	1	no	TAGAP	PREDICTED: T-cell activation Rho GTPase-activating protein-like isoform X1 [Sinocyclocheilus grahami]	-	GO:0044464//cell part;GO:0005623//cell	-	-
Unigene0000935	82	117	0.8608	1.199	1.2079	1.9591	0.8872	1.2166	1.089233333	1.3543	0.314234317	0.544406249	1	no	Ovos	PREDICTED: alpha-2-macroglobulin-like [Sinocyclocheilus grahami]	-	GO:0005576//extracellular region	-	-
Unigene0000936	12	5	0.8828	0	1.2811	0.3002	0.0548	0.412	0.7213	0.255666667	-1.496335347	0.196707351	1	no	-	--	-	-	-	-
Unigene0000937	375.3333333	453.6666667	8.9949	5.6832	11.1358	10.6025	8.4758	8.168	8.604633333	9.0821	0.077912205	0.859498445	1	no	ZBED9	PREDICTED: SCAN domain-containing protein 3-like [Sinocyclocheilus grahami]	-	-	-	-
Unigene0000938	140.6666667	88.33333333	1.983	5.5474	2.008	2.1123	1.9513	1.2763	3.179466667	1.779966667	-0.83693456	0.136010531	1	no	-	--	-	-	-	-
Unigene0000939	30.33333333	38	0.8122	1.2033	1.2079	1.3211	1.4787	0.7724	1.074466667	1.190733333	0.148229629	0.820776993	1	no	-	--	-	-	-	-
Unigene0000940	409.3333333	278	8.6678	19.3939	2.6269	6.4215	3.5376	8.5594	10.22953333	6.172833333	-0.728735587	0.240458392	1	no	-	--	-	-	-	-
Unigene0000941	31.66666667	14	0.2881	1.7262	0.0459	0.3015	0.4125	0.1163	0.686733333	0.276766667	-1.311079795	0.179771697	1	no	PRDM1	PREDICTED: PR domain zinc finger protein 1-like isoform X3 [Cyprinus carpio]	-	-	-	-
Unigene0000942	3	4	0.2142	0.139	0.296	0.2428	0.2657	0.2498	0.2164	0.252766667	0.224105723	1	1	no	-	--	-	-	-	-
Unigene0000943	5.666666667	7.333333333	0.3664	0.3057	0.217	0.2225	0.6819	0.1374	0.296366667	0.347266667	0.228660744	0.862253539	1	no	Dos	PREDICTED: voltage-dependent calcium channel beta subunit-associated regulatory protein-like [Sinocyclocheilus anshuiensis]	-	-	-	-
Unigene0000944	1258	1368.666667	2.3406	2.8003	5.6235	2.7093	4.6131	3.0051	3.588133333	3.4425	-0.059776847	0.895744652	1	no	NBEAL1	PREDICTED: neurobeachin-like protein 1 isoform X2 [Sinocyclocheilus grahami]	-	-	-	-
Unigene0000945	1	0.666666667	0	0.2014	0.1072	0.088	0	0.0905	0.102866667	0.0595	-0.789813988	1	1	no	-	--	-	-	-	-
Unigene0000946	4387	5984.333333	25.5219	32.6314	19.9028	29.5693	37.7949	27.4169	26.0187	31.5937	0.280088023	0.461287976	1	no	Gpat2	glycerol-3-phosphate acyltransferase 2, mitochondrial [Danio rerio]	ko01100//Metabolic pathways//Global and Overview//Metabolism;ko01110//Biosynthesis of secondary metabolites//Global and Overview//Metabolism;ko00564//Glycerophospholipid metabolism//Lipid metabolism//Metabolism;ko00561//Glycerolipid metabolism//Lipid metabolism//Metabolism	-	GO:0016747//transferase activity, transferring acyl groups other than amino-acyl groups;GO:0016740//transferase activity;GO:0016746//transferase activity, transferring acyl groups;GO:0003824//catalytic activity	GO:0044699//single-organism process;GO:0008152//metabolic process;GO:0044238//primary metabolic process;GO:0044710//single-organism metabolic process;GO:0071704//organic substance metabolic process;GO:0006629//lipid metabolic process
Unigene0000947	5.333333333	2.666666667	0	0.4073	0.2602	0.1067	0.1557	0.0366	0.2225	0.099666667	-1.158622352	0.403872587	1	no	-	--	-	-	-	-
Unigene0000948	3237	3767	168.5151	213.5796	170.0086	249.9229	163.7904	150.7705	184.0344333	188.1612667	0.031993954	0.93411105	1	no	-	--	-	-	-	-
Unigene0000949	45.66666667	23.33333333	1.4477	1.0364	3.4424	0.9051	0.5547	1.1549	1.9755	0.871566667	-1.18053492	0.066889268	1	no	MYH6	Myosin-7 [Larimichthys crocea]	ko04261//Adrenergic signaling in cardiomyocytes//Circulatory system//Organismal Systems;ko04530//Tight junction//Cellular commiunity//Cellular Processes;ko04260//Cardiac muscle contraction//Circulatory system//Organismal Systems	GO:0015629//actin cytoskeleton;GO:0043226//organelle;GO:0005622//intracellular;GO:0043228//non-membrane-bounded organelle;GO:0005856//cytoskeleton;GO:0005623//cell;GO:0043229//intracellular organelle;GO:0044464//cell part;GO:0043232//intracellular non-membrane-bounded organelle;GO:0044424//intracellular part	GO:1901363//heterocyclic compound binding;GO:0016817//hydrolase activity, acting on acid anhydrides;GO:0016787//hydrolase activity;GO:0032549//ribonucleoside binding;GO:0097367//carbohydrate derivative binding;GO:0017111//nucleoside-triphosphatase activity;GO:0016818//hydrolase activity, acting on acid anhydrides, in phosphorus-containing anhydrides;GO:0005515//protein binding;GO:0003824//catalyt…	GO:0032502//developmental process;GO:0048856//anatomical structure development;GO:0044699//single-organism process;GO:0009790//embryo development;GO:0032501//multicellular organismal process;GO:0007275//multicellular organism development;GO:0044707//single-multicellular organism process;GO:0044767//single-organism developmental process
Unigene0000950	30	24.33333333	1.1	1.524	1.184	1.295	0.7874	0.6293	1.269333333	0.9039	-0.489835899	0.409249238	1	no	ZNF502	PREDICTED: gastrula zinc finger protein XlCGF26.1-like isoform X2 [Sinocyclocheilus anshuiensis]	-	-	-	-
Unigene0000951	26.66666667	45.66666667	0.8179	0.6792	0.4239	0.8795	0.9849	1.0523	0.640333333	0.972233333	0.602479485	0.287571309	1	no	-	--	-	-	-	-
Unigene0000952	175	188	8.8583	6.085	8.8086	7.2639	8.8288	6.4128	7.9173	7.501833333	-0.077765307	0.866135925	1	no	-	--	-	-	-	-
Unigene0000953	18.33333333	24	0.8828	2.1487	1.8301	1.8765	2.2181	1.5448	1.620533333	1.8798	0.214110479	0.766235053	1	no	-	--	-	-	-	-
Unigene0000954	65.33333333	76.33333333	1.7416	2.3972	1.7429	1.4553	2.4869	2.1806	1.960566667	2.040933333	0.057958358	0.92542899	1	no	-	--	-	-	-	-
Unigene0000955	73.33333333	118.6666667	1.8759	2.4751	1.0489	2.4554	3.4223	1.9436	1.799966667	2.6071	0.534475731	0.314639852	1	no	-	--	-	-	-	-
Unigene0000956	7.666666667	7.666666667	0.7567	0.4018	0.4278	0.3509	0.4481	0.6019	0.528766667	0.466966667	-0.179311662	0.932311428	1	no	-	--	-	-	-	-
Unigene0000957	6757	7528.666667	137.0838	130.3327	130.4386	146.9757	115.2115	127.2518	132.6183667	129.813	-0.030845724	0.931574377	1	no	mtpn	myotrophin [Danio rerio]	-	GO:0043232//intracellular non-membrane-bounded organelle;GO:0015629//actin cytoskeleton;GO:0043227//membrane-bounded organelle;GO:0005856//cytoskeleton;GO:0043005//neuron projection;GO:0043228//non-membrane-bounded organelle;GO:0043229//intracellular organelle;GO:0044444//cytoplasmic part;GO:0005622//intracellular;GO:0005623//cell;GO:0044424//intracellular part;GO:0044464//cell part;GO:0097458//n…	-	GO:0014896//muscle hypertrophy;GO:0051252//regulation of RNA metabolic process;GO:0065007//biological regulation;GO:0014897//striated muscle hypertrophy;GO:0003300//cardiac muscle hypertrophy;GO:0051171//regulation of nitrogen compound metabolic process;GO:0010604//positive regulation of macromolecule metabolic process;GO:0080090//regulation of primary metabolic process;GO:1903508//positive regul…
Unigene0000958	84.33333333	96.66666667	1.977	0.859	1.3209	1.6948	0.4561	1.9727	1.385633333	1.374533333	-0.011603648	0.992919892	1	no	-	--	-	-	-	-
Unigene0000959	17.33333333	20.66666667	1.1866	0.231	1.0823	1.3317	0.4858	0.7475	0.8333	0.855	0.03708844	1	1	no	-	--	-	-	-	-
Unigene0000960	18	20.33333333	1.7657	2.8312	0.9689	1.2363	2.9961	1.454	1.855266667	1.895466667	0.030926518	1	1	no	-	--	-	-	-	-
Unigene0000961	11.66666667	32.66666667	0.4268	0.0875	0.2794	0.3056	0.9825	0.6879	0.264566667	0.658666667	1.315917236	0.077058204	1	no	foxa1	hepatocyte nuclear factor 3-alpha [Danio rerio]	-	-	-	-
Unigene0000962	100.6666667	33.33333333	1.6618	28.2113	0.7536	0.4415	0.3866	8.2694	10.2089	3.0325	-1.751247875	0.15114753	1	no	IGKV4-1	PREDICTED: polymeric immunoglobulin receptor-like [Sinocyclocheilus anshuiensis]	-	GO:0016020//membrane;GO:0031224//intrinsic component of membrane;GO:0044425//membrane part	-	-
Unigene0000963	55.33333333	29.66666667	1.1688	0.9558	1.7929	0.2186	0.3045	1.309	1.305833333	0.6107	-1.096435024	0.118094883	1	no	-	PREDICTED: uncharacterized protein LOC108257802 isoform X2 [Ictalurus punctatus]	-	-	-	-
Unigene0000964	61.66666667	64	4.3568	5.3578	11.7648	6.4338	2.6672	10.1317	7.1598	6.4109	-0.159392383	0.805741732	1	no	-	--	-	-	-	-
Unigene0000965	1500.666667	1760.666667	28.5136	32.0752	23.9467	33.0746	34.7131	20.1321	28.1785	29.3066	0.056630788	0.888303367	1	no	TIA1	TIA1 cytotoxic granule-associated RNA binding protein 1 [Danio rerio]	-	-	GO:0005488//binding;GO:0097159//organic cyclic compound binding	-
Unigene0000966	22.66666667	39.66666667	0.7682	1.0405	0.45	0.7951	1.181	1.5487	0.7529	1.174933333	0.642048735	0.295108467	1	no	-	--	-	-	-	-
Unigene0000967	43.33333333	52.66666667	5.7902	2.7142	5.5569	5.2877	4.0909	5.5351	4.6871	4.971233333	0.084908245	0.882981948	1	no	-	--	-	-	-	-
Unigene0000968	201.6666667	251.3333333	9.0911	13.148	9.5316	12.4654	13.3495	9.2874	10.59023333	11.70076667	0.143868686	0.752022514	1	no	-	--	-	-	-	-
Unigene0000969	4530	5466	113.4687	149.4977	101.9733	157.7188	125.5782	105.3937	121.6465667	129.5635667	0.090964486	0.80982127	1	no	tma7	PREDICTED: translation machinery-associated protein 7 [Cyprinodon variegatus]	-	-	-	-
Unigene0000970	31.66666667	31.66666667	1.8266	1.8338	1.7749	1.7471	1.2748	1.7479	1.811766667	1.589933333	-0.188430892	0.757570243	1	no	-	--	-	-	-	-
Unigene0000971	40.33333333	31	1.6681	1.5577	0.8821	0.8104	1.2988	0.7148	1.3693	0.941333333	-0.540660973	0.356977129	1	no	-	--	-	-	-	-
Unigene0000972	1437.333333	1405.666667	18.0117	15.0842	19.3714	17.5473	13.2575	14.1386	17.4891	14.98113333	-0.22330928	0.564115758	1	no	ZNF180	PREDICTED: zinc finger and SCAN domain-containing protein 5A-like isoform X1 [Sinocyclocheilus anshuiensis]	-	-	-	-
Unigene0000973	28367.66667	31796	1362.972	2129.2615	1388.0393	1715.1926	1675.6632	1454.1879	1626.7576	1615.014567	-0.010452116	0.977555521	1	no	rpl35	PREDICTED: 60S ribosomal protein L35 isoform X1 [Cyprinus carpio]	ko03010//Ribosome//Translation//Genetic Information Processing	GO:0032991//macromolecular complex;GO:1990904//ribonucleoprotein complex;GO:0005622//intracellular;GO:0044464//cell part;GO:0030529//intracellular ribonucleoprotein complex;GO:0044424//intracellular part;GO:0005623//cell	-	GO:0043170//macromolecule metabolic process;GO:0007275//multicellular organism development;GO:0032502//developmental process;GO:0044707//single-multicellular organism process;GO:0009987//cellular process;GO:0008152//metabolic process;GO:0010467//gene expression;GO:0044767//single-organism developmental process;GO:0007049//cell cycle;GO:0071704//organic substance metabolic process;GO:0032501//mult…
Unigene0000974	12	7	1.6375	0.4852	0.4428	0.4237	0.3313	0.5606	0.855166667	0.438533333	-0.963519112	0.26929545	1	no	-	--	-	-	-	-
Unigene0000975	6.666666667	10.66666667	0.372	0.4346	0.694	1.0121	0.4846	0.5858	0.5002	0.694166667	0.472777032	0.534189271	1	no	-	--	-	-	-	-
Unigene0000976	2720.666667	3429.333333	8.8889	8.4229	7.8847	8.0344	11.2389	8.8986	8.398833333	9.390633333	0.161033521	0.665458153	1	no	Ubr3	PREDICTED: E3 ubiquitin-protein ligase UBR3-like isoform X2 [Sinocyclocheilus anshuiensis]	-	-	GO:0043169//cation binding;GO:0046914//transition metal ion binding;GO:0046872//metal ion binding;GO:0043167//ion binding;GO:0005488//binding	GO:0044260//cellular macromolecule metabolic process;GO:0008152//metabolic process;GO:0043170//macromolecule metabolic process;GO:0032446//protein modification by small protein conjugation;GO:0009987//cellular process;GO:0019538//protein metabolic process;GO:0070647//protein modification by small protein conjugation or removal;GO:0044237//cellular metabolic process;GO:0006464//cellular protein mo…
Unigene0000977	631	688	6.2932	6.6308	3.9322	5.8971	6.3627	4.0691	5.618733333	5.442966667	-0.04585173	0.915839837	1	no	Srm	spermidine synthase [Danio rerio]	ko01100//Metabolic pathways//Global and Overview//Metabolism;ko00480//Glutathione metabolism//Metabolism of other amino acids//Metabolism;ko00330//Arginine and proline metabolism//Amino acid metabolism//Metabolism;ko00270//Cysteine and methionine metabolism//Amino acid metabolism//Metabolism;ko00410//beta-Alanine metabolism//Metabolism of other amino acids//Metabolism	-	GO:0003824//catalytic activity	-
Unigene0000978	30.66666667	21.33333333	0.486	1.0941	1.2277	0.7231	0.4239	0.5581	0.935933333	0.568366667	-0.719583824	0.259215045	1	no	-	--	-	-	-	-
Unigene0000979	1810.333333	1793.333333	28.4634	39.8913	28.3563	24.0639	30.9973	29.987	32.237	28.3494	-0.18539929	0.631941914	1	no	PTTG1IP	PREDICTED: pituitary tumor-transforming gene 1 protein-interacting protein-like [Sinocyclocheilus anshuiensis]	-	-	-	-
Unigene0000980	6.333333333	9.666666667	0.0777	0.983	0.4025	0.8585	0.795	0.3398	0.487733333	0.664433333	0.446031878	0.673829503	1	no	-	--	-	-	-	-
Unigene0000981	10.33333333	9	0.4997	0.1737	0.444	0.3945	0.1329	0.3123	0.372466667	0.2799	-0.412199833	0.643055393	1	no	-	PREDICTED: pleckstrin homology domain-containing family S member 1-like [Sinocyclocheilus grahami]	-	-	-	-
Unigene0000982	173	280	4.2405	9.831	4.4697	6.8135	12.1053	8.0176	6.1804	8.9788	0.538822431	0.284674575	1	no	-	--	-	-	-	-
Unigene0000983	113.3333333	125	1.8373	1.8039	1.6622	1.1252	2.2747	1.8118	1.7678	1.737233333	-0.025163525	0.960455336	1	no	-	--	-	-	-	-
Unigene0000984	8.333333333	12.33333333	0.6645	0.2773	1.4759	1.2914	0.265	1.495	0.8059	1.017133333	0.335836072	0.735715681	1	no	-	--	-	-	-	-
Unigene0000985	284.3333333	245.3333333	1.229	4.6117	0.6933	1.7195	2.0628	1.2998	2.178	1.694033333	-0.362541691	0.558905552	1	no	c3	PREDICTED: complement C3-like [Sinocyclocheilus rhinocerous]	ko04145//Phagosome//Transport and catabolism//Cellular Processes	-	-	GO:0019538//protein metabolic process;GO:0050789//regulation of biological process;GO:0065007//biological regulation;GO:0050896//response to stimulus;GO:0006955//immune response;GO:0044238//primary metabolic process;GO:0006950//response to stress;GO:0008152//metabolic process;GO:0006952//defense response;GO:0043170//macromolecule metabolic process;GO:0002376//immune system process;GO:0071704//org…
Unigene0000986	43.66666667	17.66666667	3.1462	0.6683	3.7945	1.3618	0.7984	0.5005	2.536333333	0.8869	-1.51590101	0.035255905	1	no	-	--	-	-	-	-
Unigene0000987	67.33333333	65.66666667	1.6804	1.8557	1.5337	2.7295	0.7935	0.768	1.689933333	1.430333333	-0.240614934	0.697442582	1	no	-	PREDICTED: uncharacterized protein LOC109045355 [Cyprinus carpio]	-	-	-	-
Unigene0000988	263	324.3333333	2.6051	1.5428	1.5751	1.612	2.2692	2.3679	1.907666667	2.083033333	0.12687682	0.780482492	1	no	Rasl10b	PREDICTED: ras-like protein family member 10B [Cyprinus carpio]	-	-	GO:0032550//purine ribonucleoside binding;GO:0032549//ribonucleoside binding;GO:0001882//nucleoside binding;GO:1901363//heterocyclic compound binding;GO:0097159//organic cyclic compound binding;GO:0001883//purine nucleoside binding;GO:0097367//carbohydrate derivative binding;GO:0036094//small molecule binding;GO:0005488//binding	GO:0009154//purine ribonucleotide catabolic process;GO:0050794//regulation of cellular process;GO:0044281//small molecule metabolic process;GO:0072521//purine-containing compound metabolic process;GO:0007154//cell communication;GO:0046700//heterocycle catabolic process;GO:0051716//cellular response to stimulus;GO:1901575//organic substance catabolic process;GO:0007165//signal transduction;GO:0009…
Unigene0000989	20	11	1.4081	1.0444	1.5984	0.5701	1.1231	0.2933	1.3503	0.662166667	-1.028013678	0.139199635	1	no	tc1a	PREDICTED: forkhead box protein N1 isoform X1 [Oreochromis niloticus]	-	-	GO:0016757//transferase activity, transferring glycosyl groups;GO:0003824//catalytic activity;GO:0016740//transferase activity	-
Unigene0000990	9	8	0.6929	0.9744	0.399	0.4582	0.4299	0.741	0.688766667	0.543033333	-0.342974566	0.642952598	1	no	-	putative nuclease HARBI1, partial [Larimichthys crocea]	-	-	-	-
Unigene0000991	52.33333333	51.66666667	1.303	1.3788	1.7909	1.3728	1.2125	1.2887	1.4909	1.291333333	-0.207322041	0.690725206	1	no	-	putative nuclease HARBI1, partial [Larimichthys crocea]	-	-	-	-
Unigene0000992	8.333333333	11.66666667	0.5662	0.1837	0.8477	0.2674	0.5854	1.1008	0.532533333	0.6512	0.290228868	0.765026897	1	no	-	--	-	-	-	-
Unigene0000993	13.33333333	13.66666667	1.274	0.4569	0.973	0.5131	0.6239	1.2906	0.9013	0.8092	-0.155511071	0.839517081	1	no	-	--	-	-	-	-
Unigene0000994	478.3333333	484.6666667	15.831	26.3688	11.3148	19.6157	17.2098	11.3565	17.8382	16.06066667	-0.151438265	0.743009637	1	no	Tuba1a	PREDICTED: tubulin alpha-1 chain-like [Astyanax mexicanus]	ko04145//Phagosome//Transport and catabolism//Cellular Processes;ko04540//Gap junction//Cellular commiunity//Cellular Processes	GO:0043227//membrane-bounded organelle;GO:0043229//intracellular organelle;GO:0043232//intracellular non-membrane-bounded organelle;GO:0044446//intracellular organelle part;GO:0005856//cytoskeleton;GO:0005737//cytoplasm;GO:0044422//organelle part;GO:0043228//non-membrane-bounded organelle;GO:0099513//polymeric cytoskeletal fiber;GO:0099512//supramolecular fiber;GO:0005622//intracellular;GO:004446…	GO:0005515//protein binding;GO:0005198//structural molecule activity;GO:0001882//nucleoside binding;GO:0097367//carbohydrate derivative binding;GO:0016818//hydrolase activity, acting on acid anhydrides, in phosphorus-containing anhydrides;GO:0016787//hydrolase activity;GO:0003824//catalytic activity;GO:0001883//purine nucleoside binding;GO:0016462//pyrophosphatase activity;GO:0097159//organic cyc…	GO:0044710//single-organism metabolic process;GO:0009056//catabolic process;GO:0044712//single-organism catabolic process;GO:0032502//developmental process;GO:0043623//cellular protein complex assembly;GO:0034097//response to cytokine;GO:0044772//mitotic cell cycle phase transition;GO:1901565//organonitrogen compound catabolic process;GO:1901292//nucleoside phosphate catabolic process;GO:0051649/…
Unigene0000995	806.3333333	941	16.8235	15.9492	18.2427	20.4824	14.1109	17.531	17.00513333	17.37476667	0.031023285	0.938986089	1	no	POLR3GL	PREDICTED: DNA-directed RNA polymerase III subunit RPC7-like isoform X1 [Sinocyclocheilus grahami]	ko01100//Metabolic pathways//Global and Overview//Metabolism;ko00230//Purine metabolism//Nucleotide metabolism//Metabolism;ko00240//Pyrimidine metabolism//Nucleotide metabolism//Metabolism;ko04623//Cytosolic DNA-sensing pathway//Immune system//Organismal Systems;ko03020//RNA polymerase//Transcription//Genetic Information Processing	-	-	-
Unigene0000996	29	30.66666667	1.7185	0.6397	2.0955	0.8165	1.0818	2.2111	1.484566667	1.3698	-0.116076616	0.881582524	1	no	-	--	-	-	-	-
Unigene0000997	309	290.6666667	3.7819	4.409	2.7771	3.0743	3.1772	2.894	3.656	3.0485	-0.262166524	0.544137243	1	no	mul1a	LOC402879 protein, partial [Danio rerio]	-	-	-	GO:0008152//metabolic process;GO:0036211//protein modification process;GO:0071840//cellular component organization or biogenesis;GO:0006996//organelle organization;GO:0019538//protein metabolic process;GO:0044238//primary metabolic process;GO:0016043//cellular component organization;GO:0044260//cellular macromolecule metabolic process;GO:0043412//macromolecule modification;GO:0043170//macromolecu…
Unigene0000998	2250.666667	2704	56.2038	46.9637	78.7801	76.1665	46.7539	67.3429	60.6492	63.4211	0.064474285	0.872411548	1	no	-	PREDICTED: small kinetochore-associated protein-like [Sinocyclocheilus grahami]	-	-	-	-
Unigene0000999	26	26	0.442	0.7613	1.48	0.5781	1.1073	0.6842	0.894433333	0.789866667	-0.179364815	0.795989958	1	no	-	--	-	-	-	-
Unigene0001000	267.6666667	279	26.485	42.7344	14.8739	25.5685	34.5623	18.4641	28.0311	26.1983	-0.097555161	0.84873097	1	no	-	--	-	-	-	-
Unigene0001001	45.66666667	43	0.9058	0.2998	1.3144	0.5391	0.5057	1.0144	0.84	0.6864	-0.291339775	0.658146006	1	no	KCTD16	PREDICTED: BTB/POZ domain-containing protein KCTD16-like [Cyprinus carpio]	-	-	-	GO:1902578//single-organism localization;GO:0044765//single-organism transport;GO:0044699//single-organism process;GO:0051234//establishment of localization;GO:0006810//transport;GO:0051179//localization
Unigene0001002	355.6666667	399.3333333	31.9571	20.4571	25.7874	29.528	21.8616	25.5344	26.0672	25.64133333	-0.023764341	0.9577199	1	no	-	PREDICTED: uncharacterized protein LOC109096714 isoform X3 [Cyprinus carpio]	-	-	-	-
Unigene0001003	16.33333333	12.66666667	1.4211	1.0691	0.6695	1.1534	0.4208	0.5652	1.053233333	0.713133333	-0.562581341	0.433212471	1	no	-	PREDICTED: uncharacterized protein LOC109096714 isoform X4 [Cyprinus carpio]	-	-	-	-
Unigene0001004	35.66666667	27.66666667	1.4667	1.6319	1.3899	0.4276	2.1448	0.5866	1.496166667	1.053	-0.506765458	0.457604014	1	no	-	--	-	-	-	-
Unigene0001005	45	32.33333333	3.5791	1.0136	4.3166	1.7151	2.0588	1.8219	2.969766667	1.865266667	-0.670967684	0.28830368	1	no	-	--	-	-	-	-
Unigene0001006	31.33333333	33.33333333	2.9577	2.3559	0.9754	2.0575	2.3144	1.588	2.096333333	1.986633333	-0.077542511	0.920060736	1	no	-	--	-	-	-	-
Unigene0001007	138.3333333	192	1.3121	2.1791	1.0628	1.6125	2.6779	1.3795	1.518	1.889966667	0.316188999	0.534717648	1	no	GABRD	PREDICTED: gamma-aminobutyric acid receptor subunit delta-like [Sinocyclocheilus anshuiensis]	ko04080//Neuroactive ligand-receptor interaction//Signaling molecules and interaction//Environmental Information Processing	GO:0016020//membrane;GO:0044425//membrane part;GO:0031224//intrinsic component of membrane	GO:0004872//receptor activity;GO:0022891//substrate-specific transmembrane transporter activity;GO:0005215//transporter activity;GO:0022892//substrate-specific transporter activity;GO:0060089//molecular transducer activity;GO:0015267//channel activity;GO:0022803//passive transmembrane transporter activity;GO:0099600//transmembrane receptor activity;GO:0022836//gated channel activity;GO:0022834//l…	GO:0006810//transport;GO:0051179//localization;GO:0006811//ion transport;GO:0009987//cellular process;GO:0044699//single-organism process;GO:0007154//cell communication;GO:0044765//single-organism transport;GO:1902578//single-organism localization;GO:0044763//single-organism cellular process;GO:0051234//establishment of localization
Unigene0001008	12	23.66666667	0.443	0.2464	0.4592	0.7533	0.8245	0.4153	0.382866667	0.664366667	0.79513763	0.239276041	1	no	-	--	-	-	-	-
Unigene0001009	1886	1999.666667	7.1996	6.7218	8.7728	7.1963	6.8777	7.0634	7.564733333	7.0458	-0.102525703	0.784998607	1	no	XYLT2	PREDICTED: xylosyltransferase 2-like [Sinocyclocheilus anshuiensis]	ko01100//Metabolic pathways//Global and Overview//Metabolism;ko00534//Glycosaminoglycan biosynthesis - heparan sulfate / heparin//Glycan biosynthesis and metabolism//Metabolism;ko00532//Glycosaminoglycan biosynthesis - chondroitin sulfate / dermatan sulfate//Glycan biosynthesis and metabolism//Metabolism	-	GO:0003824//catalytic activity;GO:0008194//UDP-glycosyltransferase activity;GO:0016740//transferase activity;GO:0016757//transferase activity, transferring glycosyl groups	GO:0006022//aminoglycan metabolic process;GO:0006807//nitrogen compound metabolic process;GO:0044711//single-organism biosynthetic process;GO:0009058//biosynthetic process;GO:0043170//macromolecule metabolic process;GO:1901566//organonitrogen compound biosynthetic process;GO:0044710//single-organism metabolic process;GO:0008152//metabolic process;GO:1901576//organic substance biosynthetic process…
Unigene0001010	1576.666667	1153.333333	14.7352	7.016	19.9276	5.809	8.5606	12.3211	13.89293333	8.8969	-0.642976598	0.174236641	1	no	-	PREDICTED: uncharacterized protein LOC101882312 [Danio rerio]	-	-	-	-
Unigene0001011	21	26.33333333	1.2107	1.1787	0.7843	0.9436	1.1266	1.4566	1.0579	1.1756	0.152194004	0.832102557	1	no	-	--	-	-	-	-
Unigene0001012	247	301.3333333	8.839	8.4188	6.3832	9.984	9.1752	6.3375	7.880333333	8.4989	0.109019471	0.809486066	1	no	lipB	hypothetical protein cypCar_00048681 [Cyprinus carpio]	ko01100//Metabolic pathways//Global and Overview//Metabolism;ko00785//Lipoic acid metabolism//Metabolism of cofactors and vitamins//Metabolism	GO:0043229//intracellular organelle;GO:0005623//cell;GO:0044464//cell part;GO:0043231//intracellular membrane-bounded organelle;GO:0043227//membrane-bounded organelle;GO:0043226//organelle;GO:0044424//intracellular part;GO:0005622//intracellular	GO:0016746//transferase activity, transferring acyl groups;GO:0016747//transferase activity, transferring acyl groups other than amino-acyl groups;GO:0003824//catalytic activity;GO:0016740//transferase activity	GO:0044237//cellular metabolic process;GO:0006633//fatty acid biosynthetic process;GO:0044249//cellular biosynthetic process;GO:0006082//organic acid metabolic process;GO:0008610//lipid biosynthetic process;GO:0044699//single-organism process;GO:1901576//organic substance biosynthetic process;GO:0072330//monocarboxylic acid biosynthetic process;GO:0008152//metabolic process;GO:0071704//organic su…
Unigene0001013	0	0.666666667	0	0	0	0.0816	0.0893	0	0.001	0.056966667	5.832046086	0.544544606	1	no	-	--	-	-	-	-
Unigene0001014	459.6666667	397.3333333	4.0721	5.0038	2.2819	2.9133	3.6352	2.2159	3.785933333	2.921466667	-0.373956178	0.409790205	1	no	Phactr2	PREDICTED: phosphatase and actin regulator 2 isoform X3 [Sinocyclocheilus rhinocerous]	-	-	-	-
Unigene0001015	14	9.666666667	1.923	0.7659	0.9966	0.5202	0.488	1.2236	1.2285	0.743933333	-0.723652611	0.339228504	1	no	Tf2-9	Pol polyprotein [Dicentrarchus labrax]	ko03013//RNA transport//Translation//Genetic Information Processing	-	-	-
Unigene0001016	1527.666667	1411.666667	10.9461	7.9895	9.3929	5.8886	8.5989	8.6668	9.442833333	7.7181	-0.290974071	0.461095935	1	no	Tf2-9	PREDICTED: LOW QUALITY PROTEIN: retrotransposon-like protein 1 [Maylandia zebra]	-	-	-	-
Unigene0001017	6	9.333333333	0.4837	0.8242	0.8774	0.8226	1.2379	0.9523	0.728433333	1.004266667	0.463273557	0.59722142	1	no	Tf2-9	PREDICTED: RNA-directed DNA polymerase homolog, partial [Danio rerio]	-	-	-	-
Unigene0001018	163.3333333	198.3333333	1.5915	1.7053	1.6184	1.1574	1.9001	2.2332	1.6384	1.763566667	0.106208493	0.822774632	1	no	Tf2-6	Pol polyprotein [Dicentrarchus labrax]	-	-	-	-
Unigene0001019	169.3333333	147	3.8629	3.3103	4.6511	3.245	4.0035	1.8214	3.941433333	3.0233	-0.382596229	0.433064364	1	no	Tf2-6	Retrotransposable element Tf2 protein type 1 [Larimichthys crocea]	-	-	-	-
Unigene0001020	0.666666667	0.666666667	0.1255	0.1222	0	0.1067	0.1168	0	0.082566667	0.0745	-0.148319037	1	1	no	-	--	-	-	-	-
Unigene0001021	367	302.6666667	3.6633	3.191	4.3859	2.8816	3.3899	1.9088	3.746733333	2.726766667	-0.458442048	0.295739349	1	no	PEG10	Pol polyprotein [Dicentrarchus labrax]	-	-	-	-
Unigene0001022	4	5.666666667	0.1209	0.4709	0.8774	0.6169	1.1254	0.1058	0.489733333	0.616033333	0.331012021	0.845892461	1	no	-	PREDICTED: copine-8-like [Sinocyclocheilus rhinocerous]	-	-	-	-
Unigene0001023	24.66666667	28.33333333	1.6117	1.046	1.3364	1.3246	1.1498	1.5511	1.331366667	1.341833333	0.011297535	1	1	no	Tf2-8	Retrotransposable element Tf2 protein type 1 [Larimichthys crocea]	-	-	-	-
Unigene0001024	73.33333333	59.66666667	1.1335	0.9196	2.1538	1.2849	0.668	1.0082	1.4023	0.987033333	-0.506624312	0.366390006	1	no	Tf2-9	Retrotransposable element Tf2 protein type 1 [Larimichthys crocea]	ko03013//RNA transport//Translation//Genetic Information Processing	-	-	-
Unigene0001025	2236.666667	3083	21.5296	25.1657	19.9579	25.4058	29.127	26.8304	22.21773333	27.12106667	0.287702281	0.436577765	1	no	-	PREDICTED: FHA domain-containing protein FhaA-like [Sinocyclocheilus grahami]	-	GO:0016020//membrane	-	GO:0022607//cellular component assembly;GO:0009966//regulation of signal transduction;GO:0048583//regulation of response to stimulus;GO:0007275//multicellular organism development;GO:0065007//biological regulation;GO:0048513//animal organ development;GO:0098609//cell-cell adhesion;GO:0070271//protein complex biogenesis;GO:0022037//metencephalon development;GO:0006461//protein complex assembly;GO:…
Unigene0001026	5	4.333333333	0.5576	0.2036	0.289	0.1185	0.7134	0	0.350066667	0.2773	-0.336182079	0.858284133	1	no	-	--	-	-	-	-
Unigene0001027	29	44.33333333	0.9029	0.9767	1.0398	1.7344	1.8359	0.3804	0.973133333	1.3169	0.436436404	0.518453403	1	no	-	--	-	-	-	-
Unigene0001028	8	5.333333333	0.1877	0.0609	0.1297	0.1862	0	0.0274	0.1261	0.0712	-0.824619129	0.496220115	1	no	-	PREDICTED: uncharacterized protein LOC109083040 [Cyprinus carpio]	-	-	-	-
Unigene0001029	2	2	0.344	0.1116	0.2377	0.0975	0.3201	0.2006	0.2311	0.206066667	-0.165406106	1	1	no	-	--	-	-	-	-
Unigene0001030	5	10	0.2123	0.155	0.0275	0.0903	0.3457	0.2786	0.1316	0.2382	0.856013924	0.367066382	1	no	SYT14	PREDICTED: synaptotagmin-14-like [Sinocyclocheilus grahami]	-	-	-	-
Unigene0001031	4.666666667	8.333333333	0.3485	0.1696	0.0903	0.5185	0.2027	0.2287	0.2028	0.316633333	0.64275549	0.52647193	1	no	-	--	-	-	-	-
Unigene0001032	6039.333333	6784	105.8883	118.5449	87.4224	122.8984	98.1804	87.8536	103.9518667	102.9774667	-0.013586981	0.97078643	1	no	txn	PREDICTED: thioredoxin-like [Sinocyclocheilus anshuiensis]	-	-	GO:0003824//catalytic activity;GO:0016491//oxidoreductase activity;GO:0015036//disulfide oxidoreductase activity;GO:0016667//oxidoreductase activity, acting on a sulfur group of donors	GO:0044281//small molecule metabolic process;GO:0009987//cellular process;GO:0018904//ether metabolic process;GO:0042592//homeostatic process;GO:0065007//biological regulation;GO:0044763//single-organism cellular process;GO:0019725//cellular homeostasis;GO:0008152//metabolic process;GO:0044699//single-organism process;GO:0044710//single-organism metabolic process;GO:0065008//regulation of biologi…
Unigene0001033	20	16	0.7334	0.5025	0.3942	0.231	0.4044	0.5229	0.543366667	0.3861	-0.492951511	0.449909381	1	no	-	--	-	-	-	-
Unigene0001034	15.66666667	18.33333333	0.2024	0.563	0.5994	0.3687	0.2691	0.7589	0.454933333	0.465566667	0.033332623	1	1	no	-	--	-	-	-	-
Unigene0001035	150.6666667	165	1.3073	0.6853	0.8599	0.6092	1.1814	0.9843	0.950833333	0.924966667	-0.039791105	0.941213989	1	no	Tf2-9	Pol polyprotein [Dicentrarchus labrax]	-	-	-	-
Unigene0001036	70.33333333	58.33333333	1.361	1.5516	0.8538	1.1114	0.9665	0.6894	1.255466667	0.922433333	-0.444707172	0.405928138	1	no	CALB1	PREDICTED: calbindin-like [Sinocyclocheilus anshuiensis]	-	-	-	-
Unigene0001037	2395	2344.333333	13.0115	10.975	17.8379	12.7076	8.636	14.3401	13.94146667	11.89456667	-0.22907963	0.567259661	1	no	cep162	PREDICTED: centrosomal protein of 162 kDa isoform X2 [Sinocyclocheilus rhinocerous]	-	-	-	-
Unigene0001038	23	13	1.259	1.4009	0.4195	0.8411	0.3766	0.3147	1.026466667	0.5108	-1.006856348	0.161335084	1	no	-	PREDICTED: uncharacterized protein LOC107676182 [Sinocyclocheilus anshuiensis]	-	-	-	-
Unigene0001039	126	120.6666667	2.8472	2.8585	5.6255	2.4964	2.7874	4.2037	3.777066667	3.1625	-0.256200768	0.625886854	1	no	CEP128	PREDICTED: centrosomal protein of 128 kDa-like [Sinocyclocheilus rhinocerous]	-	-	-	-
Unigene0001040	1.333333333	1.666666667	0	0.0847	0.0902	0.037	0.1619	0	0.0583	0.0663	0.185512987	1	1	no	-	--	-	-	-	-
Unigene0001041	39.66666667	31.33333333	4.3971	2.688	5.1935	2.3475	1.9031	4.205	4.092866667	2.818533333	-0.538167039	0.378010885	1	no	-	--	-	-	-	-
Unigene0001042	2713	1871.666667	39.9797	19.967	66.2281	23.4148	10.2392	41.3575	42.05826667	25.00383333	-0.750240103	0.164231412	1	no	SPATA22	PREDICTED: spermatogenesis-associated protein 22-like [Sinocyclocheilus rhinocerous]	-	-	-	-
Unigene0001043	17402	18716.33333	331.0401	521.3396	314.2947	391.306	411.5257	311.1625	388.8914667	371.3314	-0.066660263	0.860470529	1	no	rpl27	ribosomal protein L27, partial [Hypophthalmichthys nobilis]	ko03010//Ribosome//Translation//Genetic Information Processing	GO:0030529//intracellular ribonucleoprotein complex;GO:0005622//intracellular;GO:0032991//macromolecular complex;GO:0005623//cell;GO:0044464//cell part;GO:0044424//intracellular part;GO:1990904//ribonucleoprotein complex	-	GO:0043170//macromolecule metabolic process;GO:0008152//metabolic process;GO:0010467//gene expression;GO:0071704//organic substance metabolic process
Unigene0001044	34.33333333	20	1.3198	1.4601	0.2798	0.8671	0.4466	0.2624	1.0199	0.525366667	-0.957031132	0.196667423	1	no	Cd22	PREDICTED: B-cell receptor CD22-like isoform X1 [Cyprinus carpio]	-	-	-	-
Unigene0001045	169.3333333	281	2.4674	3.7704	1.651	5.6295	3.8508	2.1041	2.6296	3.861466667	0.554305556	0.284003599	1	no	SIGLEC14	PREDICTED: B-cell receptor CD22-like isoform X4 [Cyprinus carpio]	-	-	-	-
Unigene0001046	199.6666667	188.6666667	1.6091	4.764	1.4491	2.5681	2.4915	1.5464	2.6074	2.202	-0.243797454	0.65941528	1	no	CEACAM5	PREDICTED: titin-like [Sinocyclocheilus anshuiensis]	-	-	-	-
Unigene0001047	1297	1815.333333	6.7231	6.2161	3.8953	5.5282	9.721	5.8254	5.6115	7.024866667	0.324084376	0.442761848	1	no	Arhgap39	PREDICTED: rho GTPase-activating protein 39-like [Sinocyclocheilus anshuiensis]	-	GO:0005623//cell;GO:0044464//cell part	-	GO:0044763//single-organism cellular process;GO:0044699//single-organism process;GO:0009987//cellular process;GO:0007154//cell communication
Unigene0001048	326.3333333	456	3.3084	3.1699	2.0539	3.9114	3.9722	2.6884	2.844066667	3.524	0.309258641	0.47616627	1	no	Cdk14	PREDICTED: cyclin-dependent kinase 14 isoform X1 [Lates calcarifer]	-	-	-	-
Unigene0001049	14.33333333	19	1.0114	1.2923	0.3931	1.7735	0.3529	0.9955	0.898933333	1.040633333	0.211175794	0.780545409	1	no	-	--	-	-	-	-
Unigene0001050	42.33333333	46	1.6236	1.6794	3.2079	2.2432	1.6052	2.3084	2.1703	2.052266667	-0.080676276	0.905874338	1	no	-	--	-	-	-	-
Unigene0001051	9.666666667	5	1.1837	0.2161	0.7668	0	0	0.9709	0.7222	0.323633333	-1.158038211	0.383356551	1	no	-	--	-	-	-	-
Unigene0001052	3.666666667	13.33333333	0.2053	0.4997	0.4256	1.2219	1.9105	0.5389	0.376866667	1.223766667	1.699202407	0.053069592	1	no	-	--	-	-	-	-
Unigene0001053	1827.666667	1800	43.5546	32.7307	48.3262	34.1324	26.242	46.8784	41.53716667	35.75093333	-0.216421904	0.592196989	1	no	CHCHD7	PREDICTED: coiled-coil-helix-coiled-coil-helix domain-containing protein 7-like [Sinocyclocheilus rhinocerous]	-	-	-	-
Unigene0001054	26	18	0.3983	0.4847	1.7544	0.7055	0.4015	0.4646	0.879133333	0.523866667	-0.746882321	0.303786677	1	no	-	RNA-directed DNA polymerase from mobile element jockey [Larimichthys crocea]	-	-	-	-
Unigene0001055	591.6666667	635	8.6571	11.0463	7.0624	7.6945	12.3859	5.618	8.921933333	8.566133333	-0.058712235	0.896539097	1	no	NDUFV3	PREDICTED: fibrous sheath CABYR-binding protein-like isoform X3 [Sinocyclocheilus rhinocerous]	ko01100//Metabolic pathways//Global and Overview//Metabolism;ko00190//Oxidative phosphorylation//Energy metabolism//Metabolism	-	-	-
Unigene0001056	1.666666667	2.333333333	0.0752	0.293	0	0.2559	0.21	0	0.122733333	0.1553	0.339530704	0.860487026	1	no	BTN1A1	PREDICTED: E3 ubiquitin-protein ligase TRIM21-like isoform X2 [Sinocyclocheilus rhinocerous]	-	GO:0005623//cell;GO:0044464//cell part	GO:0046914//transition metal ion binding;GO:0043169//cation binding;GO:0043167//ion binding;GO:0005488//binding;GO:0046872//metal ion binding	-
Unigene0001057	2443	2253.333333	356.6016	77.5581	346.1894	187.741	94.8647	339.2197	260.1163667	207.2751333	-0.32761013	0.566402559	1	no	-	--	-	-	-	-
Unigene0001058	2008	1911.666667	16.5441	9.8608	17.4621	12.1805	9.9092	14.3991	14.62233333	12.16293333	-0.26568234	0.510749614	1	no	Trim39	PREDICTED: E3 ubiquitin-protein ligase TRIM39-like isoform X1 [Sinocyclocheilus rhinocerous]	-	GO:0005623//cell;GO:0044464//cell part	GO:0005488//binding;GO:0043169//cation binding;GO:0043167//ion binding;GO:0046914//transition metal ion binding;GO:0046872//metal ion binding	-
Unigene0001059	1.333333333	0.666666667	0	0	0.4556	0.1869	0	0	0.151866667	0.0623	-1.285501178	0.798533253	1	no	-	PREDICTED: S-antigen protein-like [Cavia porcellus]	-	-	-	-
Unigene0001060	3.333333333	4	0.4255	0.3107	0.3307	0.3617	0.198	0.5584	0.355633333	0.3727	0.067624265	1	1	no	-	--	-	-	-	-
Unigene0001061	12.66666667	17	1.2655	0.704	1.499	1.2297	1.2617	1.5817	1.156166667	1.3577	0.23181535	0.760067671	1	no	-	--	-	-	-	-
Unigene0001062	347	421.3333333	4.2483	4.5006	2.3514	4.2125	4.8593	2.9305	3.7001	4.000766667	0.112712228	0.804126527	1	no	TRIB2	PREDICTED: tribbles homolog 2-like [Cyprinus carpio]	-	-	GO:0001882//nucleoside binding;GO:0016772//transferase activity, transferring phosphorus-containing groups;GO:0001883//purine nucleoside binding;GO:0036094//small molecule binding;GO:0003824//catalytic activity;GO:0032549//ribonucleoside binding;GO:0097367//carbohydrate derivative binding;GO:1901363//heterocyclic compound binding;GO:0097159//organic cyclic compound binding;GO:0016301//kinase acti…	GO:0008152//metabolic process;GO:0044238//primary metabolic process;GO:0044237//cellular metabolic process;GO:0044260//cellular macromolecule metabolic process;GO:0071704//organic substance metabolic process;GO:0044267//cellular protein metabolic process;GO:0019538//protein metabolic process;GO:0036211//protein modification process;GO:0009987//cellular process;GO:0043170//macromolecule metabolic …
Unigene0001063	10	19.33333333	0.654	0.2653	0.7343	0.6023	0.5578	1.6211	0.5512	0.927066667	0.750097201	0.321443776	1	no	-	--	-	-	-	-
Unigene0001064	4	6.333333333	0.1157	0.9008	0.3596	0.6883	0.6457	0.6071	0.4587	0.647033333	0.49628913	0.673594485	1	no	-	--	-	-	-	-
Unigene0001065	7	7	0.5569	0.4217	0.3207	0.4209	0.4031	0.3248	0.4331	0.382933333	-0.177606924	0.925575549	1	no	-	--	-	-	-	-
Unigene0001066	9084	9926.666667	113.9091	91.7196	102.2214	97.4991	101.6289	97.3876	102.6167	98.83853333	-0.054120029	0.879391296	1	no	SCCPDH	PREDICTED: saccharopine dehydrogenase-like oxidoreductase [Sinocyclocheilus anshuiensis]	-	-	GO:0003824//catalytic activity	GO:0008152//metabolic process;GO:0044699//single-organism process;GO:0044710//single-organism metabolic process
Unigene0001067	6.666666667	3.333333333	0.3953	0.3848	1.2292	0.168	0.1839	0.5188	0.669766667	0.290233333	-1.206445354	0.240313865	1	no	-	--	-	-	-	-
Unigene0001068	134	133	4.3565	1.9748	2.9864	1.1367	2.4452	4.578	3.1059	2.719966667	-0.191422409	0.745009478	1	no	-	--	-	-	-	-
Unigene0001069	154	163	4.046	3.1086	2.9695	1.2458	3.3986	4.8794	3.3747	3.1746	-0.088184433	0.875338975	1	no	-	--	-	-	-	-
Unigene0001070	21.66666667	28.33333333	1.7784	0.6802	1.7116	1.728	0.0591	2.8896	1.390066667	1.5589	0.16537431	0.874817961	1	no	-	--	-	-	-	-
Unigene0001071	87.33333333	118.3333333	2.0666	2.7267	2.3393	2.52	3.7702	2.3077	2.377533333	2.865966667	0.269556262	0.58891996	1	no	-	--	-	-	-	-
Unigene0001072	0.666666667	0.333333333	0	0	0.2366	0	0.1062	0	0.078866667	0.0354	-1.155666308	1	1	no	-	--	-	-	-	-
Unigene0001073	817.3333333	1114	12.3384	11.1966	9.0815	12.8756	15.1435	11.3885	10.87216667	13.13586667	0.272871911	0.49403973	1	no	Clip1	PREDICTED: CAP-Gly domain-containing linker protein 1-like isoform X3 [Sinocyclocheilus grahami]	-	-	-	-
Unigene0001074	14.66666667	11	0.4068	0.5941	0.8012	0.173	0.265	0.7475	0.6007	0.395166667	-0.604183407	0.445913727	1	no	-	--	-	-	-	-
Unigene0001075	2.333333333	0	0.0517	0.1511	0.1608	0	0	0	0.1212	0.001	-6.921245889	0.045720047	1	no	-	--	-	-	-	-
Unigene0001076	13.33333333	13.33333333	1.4902	0.5935	0.6319	0.8063	0.3782	1.1853	0.9052	0.789933333	-0.196505683	0.80155735	1	no	-	--	-	-	-	-
Unigene0001077	22	27.66666667	0.2823	0.5725	0.707	0.7599	0.7004	0.2675	0.5206	0.575933333	0.145726512	0.831737861	1	no	-	PREDICTED: probable basic-leucine zipper transcription factor H [Oreochromis niloticus]	ko03460//Fanconi anemia pathway//Replication and repair//Genetic Information Processing	-	-	-
Unigene0001078	40.66666667	48	0.4531	2.0072	0.2583	1.7337	0.6536	0.4559	0.9062	0.947733333	0.06465169	0.942493362	1	no	Klhdc8a	PREDICTED: kelch domain-containing protein 8A [Danio rerio]	-	-	-	-
Unigene0001079	94.66666667	193.6666667	12.0461	6.8277	4.5324	9.821	25.413	7.9407	7.802066667	14.39156667	0.883295421	0.131754695	1	no	VMO1	PREDICTED: vitelline membrane outer layer protein 1 homolog [Sinocyclocheilus grahami]	-	-	-	-
Unigene0001080	304	236.6666667	28.2537	5.4306	7.8029	12.1074	6.2879	9.8007	13.82906667	9.398666667	-0.557175781	0.352610892	1	no	VMO1	PREDICTED: vitelline membrane outer layer protein 1-like [Sinocyclocheilus grahami]	-	-	-	-
Unigene0001081	134.6666667	177	7.6937	1.0238	2.5242	4.353	6.2321	2.5182	3.747233333	4.367766667	0.221069973	0.738032967	1	no	VMO1	PREDICTED: vitelline membrane outer layer protein 1-like [Sinocyclocheilus grahami]	-	-	-	-
Unigene0001082	54.33333333	87	3.4365	1.8459	4.4831	10.579	0.4411	2.2291	3.255166667	4.4164	0.440139433	0.595728123	1	no	VMO1	PREDICTED: vitelline membrane outer layer protein 1-like [Sinocyclocheilus grahami]	-	-	-	-
Unigene0001083	3.666666667	3	0.452	0.44	0.0937	0.4611	0.0841	0.1582	0.328566667	0.234466667	-0.486803291	0.677487161	1	no	-	--	-	-	-	-
Unigene0001084	145.6666667	208.3333333	1.4637	1.14	1.1691	1.2957	1.5704	1.8984	1.2576	1.588166667	0.336689198	0.459117147	1	no	-	PREDICTED: RNA-directed DNA polymerase from mobile element jockey-like [Cyprinus carpio]	-	-	-	-
Unigene0001085	5.666666667	11.66666667	0.6603	0.2857	0.3042	0.8733	0.4779	0.8987	0.416733333	0.749966667	0.847701973	0.278544064	1	no	-	--	-	-	-	-
Unigene0001086	269	305	3.8343	3.2082	2.8568	3.1246	4.1151	2.7224	3.299766667	3.3207	0.00912338	0.987646166	1	no	ASAH1	PREDICTED: acid ceramidase-like isoform X2 [Sinocyclocheilus rhinocerous]	ko01100//Metabolic pathways//Global and Overview//Metabolism;ko04142//Lysosome//Transport and catabolism//Cellular Processes;ko00600//Sphingolipid metabolism//Lipid metabolism//Metabolism	-	GO:0003824//catalytic activity	GO:0044238//primary metabolic process;GO:0008152//metabolic process
Unigene0001087	1672.666667	2476.333333	13.4949	14.6917	8.9786	14.219	24.0719	10.9823	12.3884	16.4244	0.406850797	0.34217831	1	no	Slc31a1	PREDICTED: LOW QUALITY PROTEIN: high affinity copper uptake protein 1-like [Cyprinus carpio]	-	GO:0016020//membrane;GO:0044425//membrane part;GO:0031224//intrinsic component of membrane	GO:0015075//ion transmembrane transporter activity;GO:0022857//transmembrane transporter activity;GO:0022891//substrate-specific transmembrane transporter activity;GO:0005215//transporter activity;GO:0046915//transition metal ion transmembrane transporter activity;GO:0022890//inorganic cation transmembrane transporter activity;GO:0046873//metal ion transmembrane transporter activity;GO:0008324//c…	GO:0010035//response to inorganic substance;GO:0048545//response to steroid hormone;GO:0000041//transition metal ion transport;GO:0050896//response to stimulus;GO:0051179//localization;GO:0010033//response to organic substance;GO:0009628//response to abiotic stimulus;GO:0009719//response to endogenous stimulus;GO:0006811//ion transport;GO:0033993//response to lipid;GO:0010038//response to metal i…
Unigene0001088	0	0.333333333	0	0	0	0	0.0425	0	0.001	0.014166667	3.824428435	1	1	no	-	--	-	-	-	-
Unigene0001089	752	1377.333333	9.2276	7.6197	6.0605	8.6051	15.9547	12.843	7.635933333	12.4676	0.707307362	0.093584229	1	no	PROS1	PREDICTED: vitamin K-dependent protein S [Sinocyclocheilus rhinocerous]	-	-	GO:0046872//metal ion binding;GO:0043167//ion binding;GO:0005488//binding;GO:0043169//cation binding	-
Unigene0001090	820.3333333	920.6666667	3.7657	4.0627	3.193	2.524	5.3249	3.2163	3.6738	3.6884	0.005722033	0.990559641	1	no	Phip	PREDICTED: PH-interacting protein isoform X1 [Sinocyclocheilus anshuiensis]	-	-	GO:1901363//heterocyclic compound binding;GO:0003676//nucleic acid binding;GO:0005488//binding;GO:0097159//organic cyclic compound binding	-
Unigene0001091	48	30.33333333	1.6748	0.4422	2.0301	0.7723	0.4226	1.068	1.382366667	0.7543	-0.873930004	0.196378307	1	no	-	--	-	-	-	-
Unigene0001092	2	3.333333333	0.4837	0	0.2507	0.2056	0.4501	0.4232	0.2448	0.359633333	0.554923188	0.729304683	1	no	-	--	-	-	-	-
Unigene0001093	81.66666667	67.33333333	7.5571	4.263	5.5634	3.9032	3.6804	5.0053	5.7945	4.1963	-0.465566356	0.366110876	1	no	-	--	-	-	-	-
Unigene0001094	40	47.66666667	1.2717	0.9761	0.6844	0.9565	1.2971	0.8559	0.9774	1.0365	0.084699107	0.886992687	1	no	-	PREDICTED: LOW QUALITY PROTEIN: protein FAM111A-like [Sinocyclocheilus grahami]	-	-	-	-
Unigene0001095	233.3333333	223.3333333	11.282	6.9863	7.7063	6.9504	6.5399	8.3822	8.6582	7.290833333	-0.247983404	0.584815872	1	no	-	PREDICTED: uncharacterized protein LOC100496506 [Xenopus tropicalis]	-	-	-	-
Unigene0001096	39.66666667	35.66666667	0.9417	1.0314	2.7654	1.7014	1.3509	0.6523	1.5795	1.234866667	-0.35511266	0.58907204	1	no	-	--	-	-	-	-
Unigene0001097	15.33333333	15	1.4846	0.925	0.3077	0.9593	0.2763	1.0911	0.905766667	0.775566667	-0.223888649	0.801751391	1	no	-	--	-	-	-	-
Unigene0001098	6	10.33333333	0.3914	0.5716	0.2028	0.6101	0.4856	0.6849	0.3886	0.593533333	0.611043154	0.459323816	1	no	-	--	-	-	-	-
Unigene0001099	10784.33333	9458.333333	91.0404	63.6343	149.1868	73.9635	45.5587	111.5172	101.2871667	77.01313333	-0.395274993	0.377483885	1	no	tmem214-b	PREDICTED: transmembrane protein 214 [Sinocyclocheilus rhinocerous]	-	-	-	-
Unigene0001100	8154	10421	30.4927	31.0015	30.8016	38.7205	33.0809	31.9832	30.76526667	34.59486667	0.169255483	0.634576586	1	no	baz1b	PREDICTED: tyrosine-protein kinase BAZ1B-like [Sinocyclocheilus anshuiensis]	-	-	-	-
Unigene0001101	1.333333333	1	0	0.2618	0	0.1143	0	0.0588	0.087266667	0.0577	-0.596859373	1	1	no	-	--	-	-	-	-
Unigene0001102	18.33333333	28.66666667	1.0463	1.146	1.4234	1.8348	1.3388	1.7737	1.205233333	1.6491	0.452366406	0.465617254	1	no	-	--	-	-	-	-
Unigene0001103	10.33333333	12.66666667	1.4663	0.3569	1.0449	1.0129	1.1939	0.882	0.956033333	1.0296	0.106951133	0.906536704	1	no	-	--	-	-	-	-
Unigene0001104	26	26.66666667	0.8964	1.1504	1.1403	1.0393	1.0616	0.7843	1.062366667	0.961733333	-0.143572958	0.819115587	1	no	-	--	-	-	-	-
Unigene0001105	642.6666667	147	1.3467	81.2867	11.7352	6.0642	10.3965	3.2293	31.4562	6.563333333	-2.260843789	0.016697399	1	no	-	PREDICTED: small ubiquitin-related modifier 1-B-like [Clupea harengus]	-	-	-	-
Unigene0001106	150.6666667	212	2.674	2.621	2.96	3.4025	4.0963	2.7692	2.751666667	3.422666667	0.314815081	0.489088015	1	no	-	--	-	-	-	-
Unigene0001107	44.33333333	45	1.1284	1.7088	1.3319	1.0127	1.3125	1.426	1.3897	1.2504	-0.152383793	0.790929592	1	no	-	--	-	-	-	-
Unigene0001108	63.66666667	47.33333333	1.6912	1.3669	3.1089	1.3565	0.386	2.2056	2.055666667	1.316033333	-0.643410315	0.327753226	1	no	-	--	-	-	-	-
Unigene0001109	201.6666667	237.6666667	2.9046	2.9949	2.08	2.3461	3.9192	2.137	2.659833333	2.800766667	0.074485948	0.87632441	1	no	FHDC1	PREDICTED: FH2 domain-containing protein 1-like [Sinocyclocheilus rhinocerous]	-	-	-	-
Unigene0001110	45	62.66666667	1.3331	0.6922	0.9903	0.9634	1.6334	1.1275	1.0052	1.241433333	0.304524213	0.581591595	1	no	-	--	-	-	-	-
Unigene0001111	58.66666667	40.33333333	3.914	1.1432	6.6261	1.9412	3.3386	1.7693	3.894433333	2.3497	-0.72893685	0.273945638	1	no	-	--	-	-	-	-
Unigene0001112	21	15.66666667	1.7058	2.0977	1.8611	0.6107	0.4177	2.6707	1.8882	1.233033333	-0.614799783	0.433725324	1	no	-	--	-	-	-	-
Unigene0001113	0	0	0	0	0	0	0	0	0.001	0.001	0	notest	notest	notest	-	--	-	-	-	-
Unigene0001114	63.66666667	118.6666667	1.902	2.9348	2.0086	3.6615	3.9406	3.7051	2.2818	3.769066667	0.724034969	0.142495724	1	no	-	--	-	-	-	-
Unigene0001115	116.3333333	152	9.6715	11.3712	4.7808	12.0181	11.9073	6.1186	8.607833333	10.01466667	0.218392353	0.682963874	1	no	-	PREDICTED: keratinocyte-associated transmembrane protein 2 [Sinocyclocheilus grahami]	-	-	-	-
Unigene0001116	25	15.66666667	1.099	5.5635	1.4808	1.5884	2.5566	0.4808	2.714433333	1.541933333	-0.815910661	0.319696667	1	no	-	--	-	-	-	-
Unigene0001117	2663.333333	1554.333333	8.9958	5.2493	23.2525	5.9087	1.8697	10.9633	12.4992	6.247233333	-1.000546439	0.108386474	1	no	SLC24A4	PREDICTED: sodium/potassium/calcium exchanger 4-like isoform X3 [Sinocyclocheilus anshuiensis]	-	GO:0016020//membrane;GO:0044425//membrane part;GO:0031224//intrinsic component of membrane	-	GO:0009987//cellular process;GO:0044763//single-organism cellular process;GO:0044699//single-organism process
Unigene0001118	0.333333333	0	0	0	0.106	0	0	0	0.035333333	0.001	-5.142957954	1	1	no	-	--	-	-	-	-
Unigene0001119	22.33333333	20.66666667	0.42	0.6389	0.7074	0.3348	0.4885	0.6201	0.588766667	0.481133333	-0.291259241	0.654050251	1	no	-	--	-	-	-	-
Unigene0001120	1227.666667	1370.333333	29.5172	39.5258	29.7596	35.7964	34.8829	26.882	32.9342	32.52043333	-0.018240025	0.963704623	1	no	lamtor4	PREDICTED: ragulator complex protein LAMTOR4 [Sinocyclocheilus grahami]	-	GO:0012505//endomembrane system;GO:0000323//lytic vacuole;GO:0043226//organelle;GO:0044424//intracellular part;GO:0016020//membrane;GO:0044446//intracellular organelle part;GO:0044440//endosomal part;GO:0098805//whole membrane;GO:0005737//cytoplasm;GO:0044444//cytoplasmic part;GO:0043231//intracellular membrane-bounded organelle;GO:0031090//organelle membrane;GO:0043229//intracellular organelle;G…	GO:0005515//protein binding;GO:0005488//binding	GO:0065007//biological regulation;GO:0008104//protein localization;GO:0044699//single-organism process;GO:0023052//signaling;GO:0033036//macromolecule localization;GO:0051641//cellular localization;GO:0051179//localization;GO:1901700//response to oxygen-containing compound;GO:0009719//response to endogenous stimulus;GO:0031929//TOR signaling;GO:0010243//response to organonitrogen compound;GO:0044…
Unigene0001121	102.6666667	108	3.4229	1.7962	2.2897	2.1053	2.3493	2.5063	2.502933333	2.3203	-0.109308516	0.830596717	1	no	-	--	-	-	-	-
Unigene0001122	12	25.66666667	0.3983	0.5041	0.5366	1.727	0.593	0.3485	0.479666667	0.8895	0.890962419	0.224280463	1	no	-	--	-	-	-	-
Unigene0001123	3002	3259	33.2743	33.4034	36.2827	34.8281	30.3799	33.0395	34.32013333	32.74916667	-0.067596961	0.853085802	1	no	GMCL1	PREDICTED: germ cell-less protein-like 1 [Sinocyclocheilus rhinocerous]	-	-	-	-
Unigene0001124	57.66666667	60.33333333	1.3577	0.3354	1.8693	1.0682	1.3011	0.8865	1.187466667	1.085266667	-0.129837438	0.8461117	1	no	Tf2-9	PREDICTED: adhesion G protein-coupled receptor E1-like [Danio rerio]	ko03013//RNA transport//Translation//Genetic Information Processing	-	-	-
Unigene0001125	18.33333333	29	0.249	0.8181	0.6452	0.5028	1.5639	0.3812	0.570766667	0.815966667	0.515609135	0.488131785	1	no	-	--	-	-	-	-
Unigene0001126	10.33333333	10.66666667	0.4885	0.6869	0.5063	0.1384	0.3535	1.0447	0.560566667	0.5122	-0.130178706	0.908436056	1	no	-	PREDICTED: uncharacterized protein LOC109091437 isoform X3 [Cyprinus carpio]	-	-	-	-
Unigene0001127	18.66666667	13	1.5182	1.9708	1.2239	0.6454	1.4128	0.8856	1.570966667	0.981266667	-0.678935411	0.318111472	1	no	-	PREDICTED: myosin-IIIa-like [Sinocyclocheilus rhinocerous]	-	-	-	-
Unigene0001128	1045.333333	1032	14.5376	15.3606	27.8671	14.0816	15.242	20.5871	19.2551	16.6369	-0.210853979	0.624135344	1	no	-	PREDICTED: RNA-directed DNA polymerase from mobile element jockey-like, partial [Cynoglossus semilaevis]	-	-	-	-
Unigene0001129	235	173.6666667	9.8111	5.4439	21.1811	6.8289	5.5818	10.8969	12.14536667	7.7692	-0.644568089	0.246301378	1	no	-	PREDICTED: myosin-IIIa-like [Sinocyclocheilus rhinocerous]	-	-	-	-
Unigene0001130	211	173	13.0266	9.0386	24.0943	12.2381	6.831	13.6642	15.3865	10.9111	-0.495868542	0.341091359	1	no	-	PREDICTED: myosin-IIIa-like [Sinocyclocheilus rhinocerous]	-	-	-	-
Unigene0001131	31	41.33333333	1.4937	1.7898	2.0841	2.2469	2.2453	1.8096	1.7892	2.1006	0.231486804	0.688505424	1	no	-	--	-	-	-	-
Unigene0001132	16	12	0.899	2.289	0.0717	0	1.8661	0.4235	1.086566667	0.7632	-0.509643618	0.676498809	1	no	-	--	-	-	-	-
Unigene0001133	85	81	3.037	1.7847	2.1836	2.3263	2.3169	1.2448	2.3351	1.962666667	-0.250669164	0.630618909	1	no	-	PREDICTED: GRIP and coiled-coil domain-containing protein 2-like [Sinocyclocheilus grahami]	-	-	-	-
Unigene0001134	3.333333333	4	0	0.5183	0.1379	0.1132	0.4954	0.1164	0.218733333	0.241666667	0.143845401	0.913111683	1	no	-	--	-	-	-	-
Unigene0001135	321.3333333	290.3333333	8.3574	6.4578	8.3892	5.5583	6.1947	6.7045	7.7348	6.1525	-0.330191235	0.43418073	1	no	NKTR	Nktr protein, partial [Danio rerio]	-	-	GO:0016859//cis-trans isomerase activity;GO:0003824//catalytic activity;GO:0016853//isomerase activity	-
Unigene0001136	21.33333333	22.66666667	1.6036	0.8058	0.9115	0.9236	0.5776	1.5841	1.106966667	1.028433333	-0.106163504	0.890174876	1	no	-	--	-	-	-	-
Unigene0001137	147.3333333	174.6666667	5.8081	7.6147	3.612	7.2427	6.2694	4.4041	5.678266667	5.972066667	0.072779667	0.887334443	1	no	-	--	-	-	-	-
Unigene0001138	205.6666667	252.3333333	5.649	13.3904	6.0673	8.4226	9.7514	9.2762	8.3689	9.150066667	0.128744246	0.79271378	1	no	-	--	-	-	-	-
Unigene0001139	7	3.333333333	0.3485	0.1357	1.0114	0.1778	0.1946	0.2439	0.498533333	0.205433333	-1.27901968	0.195813443	1	no	-	--	-	-	-	-
Unigene0001140	20	12	0.7622	0.6802	2.4357	0.486	0.3546	1.167	1.2927	0.6692	-0.949878154	0.212446516	1	no	-	--	-	-	-	-
Unigene0001141	0	0	0	0	0	0	0	0	0.001	0.001	0	notest	notest	notest	-	--	-	-	-	-
Unigene0001142	412.3333333	327	12.3225	3.3939	14.654	8.0481	2.2302	10.4001	10.12346667	6.8928	-0.554541349	0.369527793	1	no	-	hypothetical protein cypCar_00037063 [Cyprinus carpio]	-	-	-	-
Unigene0001143	44	34	1.3641	0.9522	1.0938	0.569	0.7185	1.0359	1.1367	0.774466667	-0.553576494	0.323518975	1	no	-	--	-	-	-	-
Unigene0001144	19.33333333	25.33333333	3.3687	1.6963	1.6856	3.358	2.27	2.1343	2.2502	2.587433333	0.201468456	0.775548353	1	no	-	--	-	-	-	-
Unigene0001145	1	0.333333333	0.243	0	0.1259	0.1033	0	0	0.122966667	0.034433333	-1.836389535	0.686750446	1	no	-	--	-	-	-	-
Unigene0001146	135.3333333	140.6666667	9.9767	6.9178	12.4981	8.4214	8.2819	10.0477	9.797533333	8.917	-0.135860159	0.780490862	1	no	-	--	-	-	-	-
Unigene0001147	6.666666667	9.333333333	1.0774	0.2622	0.4653	0.687	0.6683	0.8641	0.601633333	0.7398	0.298250799	0.750968232	1	no	-	--	-	-	-	-
Unigene0001148	828.3333333	445	3.4678	0.9324	5.6912	1.3741	0.7352	2.5557	3.3638	1.555	-1.11317735	0.070817272	1	no	Pol	pol-like protein [Danio rerio]	-	-	-	-
Unigene0001149	37.66666667	14.66666667	2.0228	0.458	2.9255	0.24	0.1751	1.3994	1.8021	0.604833333	-1.575069514	0.070089892	1	no	-	--	-	-	-	-
Unigene0001150	204.6666667	189.3333333	7.2614	5.2935	9.1625	5.8756	5.0596	6.6295	7.239133333	5.8549	-0.306172459	0.508274264	1	no	-	--	-	-	-	-
Unigene0001151	52.33333333	30	2.8905	3.1413	4.5984	1.9432	1.7514	1.6468	3.5434	1.780466667	-0.992878908	0.067590095	1	no	-	--	-	-	-	-
Unigene0001152	8.333333333	16.33333333	0.2315	0.4057	0.5279	0.3543	0.7325	0.9318	0.388366667	0.672866667	0.792901273	0.303104506	1	no	-	--	-	-	-	-
Unigene0001153	92	96	5.1427	8.1985	4.3309	5.4109	5.4435	5.5119	5.8907	5.455433333	-0.110745285	0.827766094	1	no	-	--	-	-	-	-
Unigene0001154	363.6666667	452.3333333	2.4359	2.6734	1.9354	2.4337	3.1265	2.2274	2.348233333	2.595866667	0.144640513	0.731210835	1	no	HIP1R	PREDICTED: huntingtin-interacting protein 1-related protein [Sinocyclocheilus rhinocerous]	-	-	GO:0005488//binding;GO:0008289//lipid binding	-
Unigene0001155	587.3333333	634.6666667	11.2218	11.88	11.5498	13.0439	10.8804	9.0287	11.55053333	10.98433333	-0.072512156	0.859223332	1	no	STX8	PREDICTED: syntaxin-8-like isoform X1 [Sinocyclocheilus rhinocerous]	ko04130//SNARE interactions in vesicular transport//Folding, sorting and degradation//Genetic Information Processing	-	-	-
Unigene0001156	55	44.66666667	2.162	3.4204	1.8207	1.2638	2.2633	1.8522	2.4677	1.7931	-0.460711067	0.415830634	1	no	-	--	-	-	-	-
Unigene0001157	2.666666667	8.333333333	0.5093	0.124	0.3959	1.5156	0.3555	0.8913	0.343066667	0.9208	1.424398877	0.181151784	1	no	-	--	-	-	-	-
Unigene0001158	12.33333333	16.33333333	0.9459	0.6651	0.3268	0.8042	0.8802	0.5977	0.645933333	0.7607	0.235942333	0.758873994	1	no	-	--	-	-	-	-
Unigene0001159	34.66666667	57.66666667	1.9999	0.5262	0.2801	0.6893	2.0622	1.4424	0.9354	1.397966667	0.579674627	0.42650005	1	no	-	--	-	-	-	-
Unigene0001160	52.66666667	70.33333333	3.0809	2.1049	3.4174	4.5955	2.1627	3.2158	2.867733333	3.324666667	0.213298826	0.701156509	1	no	-	--	-	-	-	-
Unigene0001161	65.33333333	112	1.8419	2.5268	1.0703	2.4203	4.1552	1.8069	1.813	2.794133333	0.624021941	0.260724359	1	no	-	--	-	-	-	-
Unigene0001162	1809	1925.666667	37.3046	21.7785	55.6384	32.623	22.0797	51.2427	38.2405	35.31513333	-0.114814843	0.804782874	1	no	-	--	-	-	-	-
Unigene0001163	97.66666667	98.33333333	3.3023	1.8835	4.702	3.2898	2.0486	3.2979	3.295933333	2.878766667	-0.195236203	0.716522344	1	no	-	PREDICTED: large proline-rich protein BAG6-like [Cyprinus carpio]	-	-	-	-
Unigene0001164	127.6666667	120	2.9973	2.8384	4.6882	2.3399	2.5609	3.7667	3.507966667	2.889166667	-0.279981608	0.574914211	1	no	-	PREDICTED: adhesion G protein-coupled receptor E1-like [Danio rerio]	-	-	-	-
Unigene0001165	178.6666667	163	2.3552	1.688	3.7889	3.2923	1.6134	1.2768	2.6107	2.060833333	-0.341208851	0.523984278	1	no	Tf2-8	Retrotransposable element Tf2 protein type 1 [Larimichthys crocea]	ko03013//RNA transport//Translation//Genetic Information Processing	-	-	-
Unigene0001166	818.3333333	982.6666667	13.0828	14.3955	9.8231	16.3486	12.8535	10.3285	12.4338	13.17686667	0.083740074	0.839698534	1	no	GTF3C5	PREDICTED: general transcription factor 3C polypeptide 5 [Sinocyclocheilus rhinocerous]	-	-	-	-
Unigene0001167	1.333333333	12	0.2858	0	0.0987	0.972	0.7979	1.2503	0.128166667	1.006733333	2.973588586	0.002336957	0.566864368	no	-	--	-	-	-	-
Unigene0001168	744	701.3333333	32.0074	29.771	22.0388	25.6484	26.498	17.8478	27.93906667	23.3314	-0.260010948	0.530779921	1	no	HSBP1	PREDICTED: heat shock factor-binding protein 1-like [Sinocyclocheilus grahami]	-	-	-	-
Unigene0001169	21	16	0.7114	0.5352	0.8044	0.3024	0.5116	0.5659	0.683666667	0.459966667	-0.571763772	0.371601871	1	no	-	PREDICTED: docking protein 1-like [Cyprinus carpio]	-	-	-	-
Unigene0001170	16.33333333	17.66666667	1.0627	0.5571	0.3813	0.7645	0.7607	0.3934	0.667033333	0.639533333	-0.060739302	0.966020813	1	no	-	--	-	-	-	-
Unigene0001171	7.333333333	19	0.3044	0.0988	0.7362	0.5608	1.1803	0.8434	0.3798	0.8615	1.181610891	0.142756387	1	no	-	--	-	-	-	-
Unigene0001172	5	9.333333333	0.2663	0.1152	0.0613	0.2768	0.2754	0.1812	0.1476	0.244466667	0.727945044	0.433479045	1	no	Ephb2	PREDICTED: ephrin type-B receptor 2 isoform X1 [Danio rerio]	-	-	-	-
Unigene0001173	9.666666667	18	0.7703	0.1154	0.8598	1.4105	0.3308	1.0368	0.581833333	0.926033333	0.670458174	0.420124164	1	no	-	--	-	-	-	-
Unigene0001174	46.33333333	24.66666667	1.6738	3.5945	1.5307	1.2557	0.9162	1.0337	2.266333333	1.068533333	-1.084728155	0.068311927	1	no	-	--	-	-	-	-
Unigene0001175	53.66666667	56	2.3407	0.7804	2.0937	1.772	1.82	1.1783	1.738266667	1.5901	-0.128531924	0.830849231	1	no	-	--	-	-	-	-
Unigene0001176	2	2.333333333	0.0454	0	0.235	0.1542	0.1266	0	0.093466667	0.0936	0.002056586	1	1	no	-	--	-	-	-	-
Unigene0001177	108	383.3333333	1.1468	1.5418	6.3392	23.8182	2.8965	0.2389	3.009266667	8.984533333	1.578031613	0.131184772	1	no	pxn1	PREDICTED: fucolectin-4-like [Sinocyclocheilus grahami]	-	-	-	-
Unigene0001178	33	113.3333333	0.1847	0.3237	3.2543	8.6367	2.028	0.1939	1.254233333	3.619533333	1.528997935	0.162870962	1	no	-	--	-	-	-	-
Unigene0001179	171	107.3333333	1.6252	1.4455	2.1108	0.7591	0.9895	1.1147	1.727166667	0.954433333	-0.855690971	0.070981254	1	no	TBX18	PREDICTED: T-box transcription factor TBX18-like isoform X2 [Sinocyclocheilus rhinocerous]	-	GO:0043231//intracellular membrane-bounded organelle;GO:0043226//organelle;GO:0044424//intracellular part;GO:0005622//intracellular;GO:0043227//membrane-bounded organelle;GO:0044464//cell part;GO:0043229//intracellular organelle;GO:0005623//cell	GO:0003676//nucleic acid binding;GO:1901363//heterocyclic compound binding;GO:0005488//binding;GO:0097159//organic cyclic compound binding	GO:0043170//macromolecule metabolic process;GO:0006807//nitrogen compound metabolic process;GO:0006139//nucleobase-containing compound metabolic process;GO:0034645//cellular macromolecule biosynthetic process;GO:0090304//nucleic acid metabolic process;GO:1901360//organic cyclic compound metabolic process;GO:0016070//RNA metabolic process;GO:0044260//cellular macromolecule metabolic process;GO:003…
Unigene0001180	2.666666667	1.333333333	0.036	0.0702	0.1867	0.0919	0.0335	0	0.097633333	0.0418	-1.223870845	0.457278731	1	no	-	PREDICTED: Hermansky-Pudlak syndrome 5 protein [Callorhinchus milii]	-	-	-	-
Unigene0001181	6.333333333	6.666666667	0.5179	0	0.9202	0.1258	0.8261	0.3884	0.479366667	0.446766667	-0.101608043	0.945778519	1	no	-	--	-	-	-	-
Unigene0001182	5.666666667	6	0.682	0.5533	0.7069	1.0631	0.3173	0.3978	0.6474	0.592733333	-0.127274173	1	1	no	-	PREDICTED: neuron navigator 3-like [Poecilia mexicana]	ko03013//RNA transport//Translation//Genetic Information Processing	-	-	-
Unigene0001183	608.6666667	421	10.0895	6.3211	12.2812	6.6059	4.3611	6.3074	9.563933333	5.758133333	-0.732002878	0.094461715	1	no	fuz	PREDICTED: protein fuzzy homolog [Sinocyclocheilus rhinocerous]	-	-	-	-
Unigene0001184	1621.333333	2302.666667	10.7111	9.2058	9.5194	11.7542	11.2642	13.7852	9.8121	12.26786667	0.32225055	0.390093002	1	no	Sp4	PREDICTED: LOW QUALITY PROTEIN: transcription factor Sp4-like [Cyprinus carpio]	-	-	GO:0097159//organic cyclic compound binding;GO:0005488//binding	-
Unigene0001185	0	0	0	0	0	0	0	0	0.001	0.001	0	notest	notest	notest	-	novel protein similar to DNA polymerases [Danio rerio]	-	-	-	-
Unigene0001186	645.3333333	665.6666667	24.8275	26.5913	15.2467	26.8046	17.3513	16.4353	22.22183333	20.19706667	-0.137832069	0.752399308	1	no	-	--	-	-	-	-
Unigene0001187	21	26.33333333	0.7349	0.5504	0.498	0.6729	0.868	0.4451	0.594433333	0.662	0.155316199	0.808719672	1	no	-	--	-	-	-	-
Unigene0001188	20.33333333	22.33333333	1.8076	2.2188	0.7331	1.8041	0.9507	1.8566	1.5865	1.537133333	-0.045605209	0.971674569	1	no	-	--	-	-	-	-
Unigene0001189	0.666666667	0.333333333	0.1273	0.124	0	0.1083	0	0	0.083766667	0.0361	-1.214377428	1	1	no	-	--	-	-	-	-
Unigene0001190	4.333333333	4	0.7289	0.5914	0.2518	0.8264	0	0.4252	0.524033333	0.4172	-0.328919425	0.826229972	1	no	-	--	-	-	-	-
Unigene0001191	159	165.6666667	4.2837	1.4819	4.733	2.6992	3.2982	3.5767	3.499533333	3.191366667	-0.132988176	0.803915264	1	no	-	PREDICTED: myosin-IIIa-like [Sinocyclocheilus rhinocerous]	-	-	-	-
Unigene0001192	33.66666667	32.33333333	1.3461	0.557	1.5348	1.0587	0.9395	0.8833	1.145966667	0.9605	-0.254707561	0.690781695	1	no	-	--	-	-	-	-
Unigene0001193	3.666666667	3.333333333	0.126	0.1226	0.0979	0.1071	0.1172	0.0551	0.1155	0.093133333	-0.310523332	0.755496616	1	no	-	--	-	-	-	-
Unigene0001194	473.3333333	529.6666667	6.5171	4.2801	2.9408	3.3674	5.6229	4.7108	4.579333333	4.567033333	-0.003880264	0.994583016	1	no	Irf2	PREDICTED: interferon regulatory factor 2-like [Sinocyclocheilus anshuiensis]	-	-	-	-
Unigene0001195	33.66666667	26.33333333	0.961	0.8607	2.1116	0.8171	1.0373	0.8408	1.3111	0.8984	-0.545347894	0.374080281	1	no	-	--	-	-	-	-
Unigene0001196	1928	2241.333333	36.5755	14.6079	67.2814	46.3207	11.3199	60.178	39.48826667	39.27286667	-0.007891133	0.989947738	1	no	QRICH2	PREDICTED: neurofilament heavy polypeptide-like [Sinocyclocheilus anshuiensis]	-	-	-	-
Unigene0001197	0	0	0	0	0	0	0	0	0.001	0.001	0	notest	notest	notest	-	--	-	-	-	-
Unigene0001198	60.33333333	73	0.8522	1.2286	0.8833	0.8639	1.5251	0.8173	0.988033333	1.068766667	0.113315298	0.836594425	1	no	-	--	-	-	-	-
Unigene0001199	216	320	0.6772	0.995	0.3444	0.6131	1.3828	0.7022	0.6722	0.899366667	0.420018872	0.421692021	1	no	LRRK2	PREDICTED: leucine-rich repeat serine/threonine-protein kinase 2-like [Sinocyclocheilus rhinocerous]	-	GO:0044464//cell part;GO:0005623//cell	GO:0097159//organic cyclic compound binding;GO:0097367//carbohydrate derivative binding;GO:0016301//kinase activity;GO:0032550//purine ribonucleoside binding;GO:0032549//ribonucleoside binding;GO:0016740//transferase activity;GO:0001882//nucleoside binding;GO:0003824//catalytic activity;GO:0036094//small molecule binding;GO:0004672//protein kinase activity;GO:0001883//purine nucleoside binding;GO…	GO:0009987//cellular process;GO:0007154//cell communication;GO:0043170//macromolecule metabolic process;GO:0043412//macromolecule modification;GO:0044260//cellular macromolecule metabolic process;GO:0044237//cellular metabolic process;GO:0007165//signal transduction;GO:0035556//intracellular signal transduction;GO:0044238//primary metabolic process;GO:0071704//organic substance metabolic process;…
Unigene0001200	22385	25269	251.771	242.6969	265.4545	306.8859	240.2204	206.1554	253.3074667	251.0872333	-0.012700928	0.972100888	1	no	Cct7	PREDICTED: T-complex protein 1 subunit eta-like [Sinocyclocheilus anshuiensis]	-	GO:0005622//intracellular;GO:0005623//cell;GO:0044424//intracellular part;GO:0044464//cell part	GO:0097367//carbohydrate derivative binding;GO:0097159//organic cyclic compound binding;GO:0001883//purine nucleoside binding;GO:0005488//binding;GO:0001882//nucleoside binding;GO:1901363//heterocyclic compound binding;GO:0005515//protein binding;GO:0036094//small molecule binding;GO:0032550//purine ribonucleoside binding;GO:0032549//ribonucleoside binding	GO:0043170//macromolecule metabolic process;GO:0044267//cellular protein metabolic process;GO:0044260//cellular macromolecule metabolic process;GO:0009987//cellular process;GO:0071704//organic substance metabolic process;GO:0044237//cellular metabolic process;GO:0008152//metabolic process;GO:0019538//protein metabolic process;GO:0044238//primary metabolic process
Unigene0001201	25.66666667	17	2.5572	1.5115	3.0291	0.6212	2.6345	0.9589	2.365933333	1.404866667	-0.751976209	0.293279246	1	no	-	--	-	-	-	-
Unigene0001202	2339	2447.666667	8.8008	7.9047	8.5457	6.7326	7.8958	8.6885	8.417066667	7.7723	-0.114975956	0.756866804	1	no	ago3	PREDICTED: protein argonaute-3 isoform X2 [Esox lucius]	-	GO:0032991//macromolecular complex;GO:0005622//intracellular;GO:0031332//RNAi effector complex;GO:0044424//intracellular part;GO:0005623//cell;GO:0044464//cell part;GO:0030529//intracellular ribonucleoprotein complex;GO:1990904//ribonucleoprotein complex	GO:0003723//RNA binding;GO:1901363//heterocyclic compound binding;GO:0097159//organic cyclic compound binding;GO:0005488//binding;GO:0003676//nucleic acid binding	GO:0060255//regulation of macromolecule metabolic process;GO:1901576//organic substance biosynthetic process;GO:0019538//protein metabolic process;GO:0044763//single-organism cellular process;GO:0071704//organic substance metabolic process;GO:0051172//negative regulation of nitrogen compound metabolic process;GO:0010467//gene expression;GO:0065007//biological regulation;GO:0032269//negative regul…
Unigene0001203	378	414.6666667	4.5672	4.7482	4.2271	4.4712	4.0169	4.6011	4.514166667	4.363066667	-0.049117167	0.905794595	1	no	ago3	PREDICTED: protein argonaute-3-like isoform X1 [Clupea harengus]	-	GO:0032991//macromolecular complex;GO:1990904//ribonucleoprotein complex;GO:0030529//intracellular ribonucleoprotein complex;GO:0044424//intracellular part;GO:0005623//cell;GO:0044464//cell part;GO:0005622//intracellular;GO:0031332//RNAi effector complex	GO:0005488//binding;GO:0003723//RNA binding;GO:0097159//organic cyclic compound binding;GO:0003676//nucleic acid binding;GO:1901363//heterocyclic compound binding	GO:0044237//cellular metabolic process;GO:0043170//macromolecule metabolic process;GO:0043603//cellular amide metabolic process;GO:0065007//biological regulation;GO:0010556//regulation of macromolecule biosynthetic process;GO:0044249//cellular biosynthetic process;GO:0051246//regulation of protein metabolic process;GO:0051248//negative regulation of protein metabolic process;GO:0009892//negative …
Unigene0001204	0.666666667	2	0	0.1131	0.1204	0.1975	0.1081	0.3049	0.077833333	0.2035	1.386568745	0.3972122	1	no	Prkag2	PREDICTED: 5'-AMP-activated protein kinase subunit gamma-2 isoform X2 [Lepisosteus oculatus]	ko04068//FoxO signaling pathway//Signal transduction//Environmental Information Processing;ko04910//Insulin signaling pathway//Endocrine system//Organismal Systems;ko04920//Adipocytokine signaling pathway//Endocrine system//Organismal Systems	-	-	-
Unigene0001205	2	2.666666667	0.0828	0.0806	0.0858	0	0.154	0.1448	0.083066667	0.0996	0.26187608	0.855445296	1	no	-	--	-	-	-	-
Unigene0001206	2.666666667	4	0.1185	0.1154	0.2456	0.2015	0.2205	0.2074	0.159833333	0.2098	0.392446363	0.8721158	1	no	-	--	-	-	-	-
Unigene0001207	21	57.66666667	0.6048	0.0906	0.2893	0.4878	1.2842	0.6377	0.328233333	0.803233333	1.291097383	0.070709255	1	no	myadm	PREDICTED: myeloid-associated differentiation marker-like [Sinocyclocheilus anshuiensis]	-	-	-	-
Unigene0001208	163.6666667	148.3333333	1.8714	2.0444	3.1538	1.6883	1.4755	2.4372	2.356533333	1.867	-0.335944161	0.488574769	1	no	TPH1	PREDICTED: tryptophan 5-hydroxylase 1 isoform X1 [Sinocyclocheilus rhinocerous]	ko01100//Metabolic pathways//Global and Overview//Metabolism;ko00380//Tryptophan metabolism//Amino acid metabolism//Metabolism	-	GO:0016714//oxidoreductase activity, acting on paired donors, with incorporation or reduction of molecular oxygen, reduced pteridine as one donor, and incorporation of one atom of oxygen;GO:0004497//monooxygenase activity;GO:0046872//metal ion binding;GO:0046914//transition metal ion binding;GO:0005488//binding;GO:0043168//anion binding;GO:0036094//small molecule binding;GO:0031406//carboxylic ac…	GO:0042428//serotonin metabolic process;GO:0008152//metabolic process;GO:0006725//cellular aromatic compound metabolic process;GO:0044699//single-organism process;GO:0006807//nitrogen compound metabolic process;GO:1901564//organonitrogen compound metabolic process;GO:0006520//cellular amino acid metabolic process;GO:0044237//cellular metabolic process;GO:0044238//primary metabolic process;GO:0046…
Unigene0001209	16.33333333	8.666666667	1.6413	1.38	0.6186	0.2537	0.2083	1.2402	1.2133	0.5674	-1.096498259	0.188785318	1	no	PLAU	PREDICTED: urokinase-type plasminogen activator-like [Sinocyclocheilus anshuiensis]	-	-	GO:0004175//endopeptidase activity;GO:0016787//hydrolase activity;GO:0008233//peptidase activity;GO:0016740//transferase activity;GO:0070011//peptidase activity, acting on L-amino acid peptides;GO:0003824//catalytic activity;GO:0016772//transferase activity, transferring phosphorus-containing groups	GO:0016485//protein processing;GO:0006793//phosphorus metabolic process;GO:0006508//proteolysis;GO:0019538//protein metabolic process;GO:0006796//phosphate-containing compound metabolic process;GO:0009987//cellular process;GO:0044237//cellular metabolic process;GO:0031638//zymogen activation;GO:0010467//gene expression;GO:0071704//organic substance metabolic process;GO:0043170//macromolecule meta…
Unigene0001210	25.33333333	20.66666667	0.9387	3.3291	0.7645	0.342	2.3709	1.056	1.677433333	1.2563	-0.417074414	0.616992796	1	no	-	PREDICTED: uncharacterized protein LOC107552172 isoform X1 [Sinocyclocheilus grahami]	-	-	-	-
Unigene0001211	13.66666667	15.33333333	0.7158	0.1161	0.8244	0.4057	0.8881	0.3479	0.5521	0.547233333	-0.01277349	1	1	no	Tf2-6	PREDICTED: uncharacterized mitochondrial protein AtMg00860-like [Sinocyclocheilus anshuiensis]	-	-	-	-
Unigene0001212	319	357.3333333	2.6258	2.4647	2.4291	1.5394	2.6184	3.3055	2.506533333	2.487766667	-0.010842242	0.982921901	1	no	RUNX1T1	PREDICTED: protein CBFA2T1 isoform X1 [Sinocyclocheilus anshuiensis]	-	-	-	-
Unigene0001213	219.3333333	139	10.4297	3.7538	28.3028	8.4376	2.8821	11.6692	14.1621	7.662966667	-0.886060273	0.20061412	1	no	-	--	-	-	-	-
Unigene0001214	44.66666667	52	1.6533	1.7042	0.9744	1.4332	1.6289	1.4181	1.443966667	1.4934	0.048563198	0.939756271	1	no	-	--	-	-	-	-
Unigene0001215	0.333333333	0	0	0.0605	0	0	0	0	0.020166667	0.001	-4.333900737	1	1	no	-	PREDICTED: uncharacterized protein LOC107656688 [Sinocyclocheilus anshuiensis]	-	-	-	-
Unigene0001216	1079.666667	1321.333333	4.2038	4.4252	4.4238	4.7257	4.757	4.6029	4.350933333	4.6952	0.109861702	0.774468368	1	no	GLTSCR1	PREDICTED: glioma tumor suppressor candidate region gene 1 protein-like isoform X3 [Sinocyclocheilus rhinocerous]	-	-	-	-
Unigene0001217	54798	55655.33333	298.2107	188.7044	528.6288	346.4951	151.0082	391.906	338.5146333	296.4697667	-0.191333211	0.685158935	1	no	pim2	PREDICTED: serine/threonine-protein kinase pim-2-like [Cyprinus carpio]	-	-	-	-
Unigene0001218	146.6666667	181.6666667	4.3404	5.8928	2.6931	3.4141	5.8797	5.0375	4.308766667	4.7771	0.148860103	0.769776542	1	no	-	--	-	-	-	-
Unigene0001219	49.66666667	95.66666667	1.0058	1.6913	1.8638	1.5807	3.3182	2.9066	1.5203	2.601833333	0.775172512	0.154364847	1	no	-	--	-	-	-	-
Unigene0001220	11.33333333	16.33333333	0.5306	0.5166	0.4583	0.2256	1.3989	0.3482	0.501833333	0.657566667	0.389928866	0.651052199	1	no	-	--	-	-	-	-
Unigene0001221	87.66666667	88	1.2635	3.6669	1.2848	1.7228	2.2405	1.6269	2.071733333	1.8634	-0.152900918	0.791531032	1	no	-	--	-	-	-	-
Unigene0001222	91	82	6.7084	5.2587	12.1002	6.2962	5.0263	7.5463	8.022433333	6.2896	-0.351071627	0.511926195	1	no	-	--	-	-	-	-
Unigene0001223	331	467.3333333	22.2209	0.2306	1.1049	4.834	15.4529	9.555	7.852133333	9.9473	0.341220317	0.737814958	1	no	dhdh	PREDICTED: trans-1,2-dihydrobenzene-1,2-diol dehydrogenase-like [Sinocyclocheilus grahami]	ko00980//Metabolism of xenobiotics by cytochrome P450//Xenobiotics biodegradation and metabolism//Metabolism;ko00040//Pentose and glucuronate interconversions//Carbohydrate metabolism//Metabolism	-	-	GO:0044699//single-organism process;GO:0008152//metabolic process;GO:0044710//single-organism metabolic process
Unigene0001224	56.33333333	87	1.3186	3.6311	1.3667	1.6336	2.5241	4.5488	2.105466667	2.902166667	0.462990338	0.453084724	1	no	-	--	-	-	-	-
Unigene0001225	181.3333333	176	11.7362	14.4809	7.806	11.8461	6.4825	10.7077	11.34103333	9.678766667	-0.22865697	0.637245876	1	no	-	--	-	-	-	-
Unigene0001226	995.3333333	989	53.9805	66.8947	37.4284	52.9494	38.9474	46.9499	52.76786667	46.28223333	-0.189201176	0.647741174	1	no	-	--	-	-	-	-
Unigene0001227	25	23.33333333	0.68	1.1498	0.8532	0.5782	0.8992	0.7515	0.894333333	0.742966667	-0.267515163	0.656986682	1	no	-	--	-	-	-	-
Unigene0001228	32.66666667	27.33333333	2.5916	1.9077	1.7034	1.3436	2.1763	1.1061	2.067566667	1.542	-0.423131083	0.487197951	1	no	-	PREDICTED: golgin subfamily A member 6-like protein 22 [Kryptolebias marmoratus]	-	-	-	-
Unigene0001229	345.3333333	392.6666667	1.8782	1.7991	1.5303	1.3663	2.1309	1.7663	1.735866667	1.7545	0.01540381	0.973609188	1	no	NHS	PREDICTED: Nance-Horan syndrome protein-like isoform X2 [Sinocyclocheilus rhinocerous]	-	-	-	-
Unigene0001230	111.6666667	153.6666667	2.6205	2.3778	3.5863	2.4227	4.001	4.0068	2.861533333	3.476833333	0.280985499	0.565791586	1	no	pol	PREDICTED: uncharacterized protein LOC108184914 [Danio rerio]	-	-	-	-
Unigene0001231	547.6666667	715.6666667	38.1233	38.0336	27.1251	50.7595	38.6363	29.6124	34.42733333	39.6694	0.20447214	0.630075674	1	no	glrx3	PREDICTED: glutaredoxin 3-like isoform X3 [Sinocyclocheilus grahami]	-	GO:0005622//intracellular;GO:0044444//cytoplasmic part;GO:0005737//cytoplasm;GO:0044464//cell part;GO:0044424//intracellular part;GO:0005623//cell	GO:0016667//oxidoreductase activity, acting on a sulfur group of donors;GO:0016491//oxidoreductase activity;GO:0015036//disulfide oxidoreductase activity;GO:0003824//catalytic activity	GO:0055065//metal ion homeostasis;GO:0098771//inorganic ion homeostasis;GO:0055080//cation homeostasis;GO:0043170//macromolecule metabolic process;GO:0065007//biological regulation;GO:0044763//single-organism cellular process;GO:0044710//single-organism metabolic process;GO:0055076//transition metal ion homeostasis;GO:0019725//cellular homeostasis;GO:0044238//primary metabolic process;GO:0009987/…
Unigene0001232	65	77.66666667	0.9936	0.7708	1.2873	0.6864	1.4157	1.1274	1.017233333	1.0765	0.081697676	0.888248502	1	no	-	--	-	-	-	-
Unigene0001233	28.66666667	10	1.4167	0.4214	1.5908	0.3346	0.1831	0.5165	1.142966667	0.344733333	-1.72923062	0.019474993	1	no	-	--	-	-	-	-
Unigene0001234	20.33333333	21	0.4054	1.0195	0.6303	0.517	0.723	0.6502	0.685066667	0.630066667	-0.120739903	0.850295842	1	no	-	PREDICTED: LOW QUALITY PROTEIN: protein NLRC5-like [Sinocyclocheilus anshuiensis]	-	-	-	-
Unigene0001235	8	12	0.3144	0.9181	0.6517	0.6682	0.9507	0.8939	0.628066667	0.8376	0.415343739	0.633020629	1	no	-	--	-	-	-	-
Unigene0001236	3186.333333	3817.666667	14.0703	12.1949	13.3383	11.1906	16.9347	13.9324	13.20116667	14.01923333	0.08674202	0.816266677	1	no	Atp11c	PREDICTED: phospholipid-transporting ATPase IG isoform X1 [Sinocyclocheilus rhinocerous]	-	-	-	-
Unigene0001237	5533.333333	4343	24.9171	9.9585	31.5242	13.9924	15.9316	15.643	22.13326667	15.189	-0.543189505	0.217544191	1	no	pol	Septin-8-A [Larimichthys crocea]	-	-	-	-
Unigene0001238	1.333333333	5.333333333	0.2522	0.2456	0	0.7506	0.7042	0.331	0.165933333	0.595266667	1.84293238	0.109184251	1	no	-	--	-	-	-	-
Unigene0001239	69.66666667	65	1.1017	1.7292	1.8876	1.7586	1.0879	1.0032	1.572833333	1.283233333	-0.293582279	0.586474684	1	no	-	PREDICTED: RNA-directed DNA polymerase from mobile element jockey-like [Oryzias latipes]	-	-	-	-
Unigene0001240	0	0	0	0	0	0	0	0	0.001	0.001	0	notest	notest	notest	-	PREDICTED: uncharacterized protein C2orf61 homolog [Sinocyclocheilus rhinocerous]	-	-	-	-
Unigene0001241	13	8.666666667	1.1824	0.3223	0.3431	0.1206	0.5281	0.4552	0.615933333	0.367966667	-0.743199125	0.412436488	1	no	pol	PREDICTED: protein MAATS1 isoform X1 [Danio rerio]	-	-	-	-
Unigene0001242	15.33333333	10	1.1035	0.2387	1.5251	0.5734	0	1.0192	0.955766667	0.530866667	-0.848308896	0.412204763	1	no	-	--	-	-	-	-
Unigene0001243	167	192	3.9662	5.5379	3.543	5.1914	3.885	4.1551	4.349033333	4.4105	0.020247451	0.971773371	1	no	si:ch211-67n3.3	BLOC-1-related complex subunit 7 [Danio rerio]	-	-	-	-
Unigene0001244	6.333333333	13.33333333	0.1273	0.4339	0.6599	0.5954	1.1849	0.5013	0.407033333	0.760533333	0.901864535	0.266962832	1	no	Tmem150c	PREDICTED: transmembrane protein 150C-like [Sinocyclocheilus rhinocerous]	-	-	-	-
Unigene0001245	190.6666667	221.3333333	10.1318	11.479	12.4052	12.1911	10.6961	11.8195	11.33866667	11.5689	0.029000695	0.948583697	1	no	-	--	-	-	-	-
Unigene0001246	3	2.333333333	0.5821	0.1889	0.1006	0.0825	0.0903	0.4244	0.290533333	0.199066667	-0.545452031	0.764979967	1	no	-	--	-	-	-	-
Unigene0001247	17.33333333	29.66666667	0.9922	0.8174	2.2151	1.3628	2.2017	2.4708	1.341566667	2.011766667	0.584544236	0.372161144	1	no	-	--	-	-	-	-
Unigene0001248	18	26.66666667	0.534	0.7624	0.6272	1.0291	0.9275	0.5606	0.6412	0.839066667	0.388011017	0.528799488	1	no	-	--	-	-	-	-
Unigene0001249	12.66666667	35.33333333	1.502	0	0.4151	0.9791	0.5125	3.1539	0.639033333	1.5485	1.276908291	0.209818033	1	no	-	--	-	-	-	-
Unigene0001250	576.3333333	604.3333333	2.0362	2.1288	1.8929	1.4754	2.3669	1.806	2.0193	1.882766667	-0.101001046	0.806678692	1	no	AKAP13	PREDICTED: A-kinase anchor protein 13-like isoform X6 [Sinocyclocheilus anshuiensis]	-	-	-	-
Unigene0001251	168.3333333	150.6666667	7.9044	6.8459	11.3848	6.4151	5.7315	8.308	8.7117	6.8182	-0.353563355	0.45751071	1	no	-	--	-	-	-	-
Unigene0001252	9	17.33333333	0.4875	0.4218	0.5614	0.7828	0.8568	0.853	0.490233333	0.830866667	0.761148396	0.260120295	1	no	-	--	-	-	-	-
Unigene0001253	78	59.33333333	2.0028	2.5901	2.4167	0.915	2.3088	1.5431	2.336533333	1.588966667	-0.556280759	0.301302735	1	no	-	Retrotransposable element Tf2 protein type 3 [Larimichthys crocea]	-	-	-	-
Unigene0001254	16.33333333	19	0.6028	0.8608	0.4999	0.6834	0.8602	0.4923	0.6545	0.678633333	0.052239102	0.964895907	1	no	-	--	-	-	-	-
Unigene0001255	39	46.33333333	2.398	2.594	1.2151	2.0842	2.281	2.1914	2.069033333	2.185533333	0.079028494	0.901277046	1	no	-	--	-	-	-	-
Unigene0001256	11	8.666666667	1.1422	0.7645	0.444	0.3642	1.0629	0.2498	0.783566667	0.558966667	-0.487293774	0.578392096	1	no	-	PREDICTED: zinc finger BED domain-containing protein 4 isoform X3 [Danio rerio]	-	-	-	-
Unigene0001257	14.66666667	19	1.4747	0.4594	0.6725	0.9027	1.1527	0.929	0.868866667	0.9948	0.195271705	0.794984636	1	no	-	--	-	-	-	-
Unigene0001258	0	2.333333333	0	0	0	0.0302	0.033	0.1553	0.001	0.072833333	6.186526969	0.059318895	1	no	-	--	-	-	-	-
Unigene0001259	34.33333333	47	0.8717	0.7738	1.0098	0.9373	1.1213	1.144	0.8851	1.067533333	0.270368751	0.618577547	1	no	-	--	-	-	-	-
Unigene0001260	1673	2014	8.6637	9.3521	10.598	10.7257	7.9985	11.4546	9.537933333	10.0596	0.076824336	0.841332129	1	no	MCF2L	PREDICTED: guanine nucleotide exchange factor DBS-like [Sinocyclocheilus grahami]	-	-	-	-
Unigene0001261	285	295.6666667	1.8544	1.0923	2.8691	2.8391	0.9753	1.3755	1.9386	1.729966667	-0.164270916	0.758295256	1	no	CDH1	PREDICTED: B-cadherin-like [Sinocyclocheilus grahami]	ko04514//Cell adhesion molecules (CAMs)//Signaling molecules and interaction//Environmental Information Processing;ko04520//Adherens junction//Cellular commiunity//Cellular Processes	-	-	-
Unigene0001262	4.333333333	0	0.6213	0.3025	0.0805	0	0	0	0.334766667	0.001	-8.387012073	0.006784613	0.896297988	no	-	--	-	-	-	-
Unigene0001263	14.33333333	12	1.2549	0.7716	0.8215	0.4492	1.2292	0.4623	0.949333333	0.713566667	-0.411866517	0.565712493	1	no	-	--	-	-	-	-
Unigene0001264	24.33333333	28	1.7087	1.2156	1.9073	2.3468	1.1008	1.38	1.610533333	1.6092	-0.001194878	1	1	no	-	--	-	-	-	-
Unigene0001265	26.66666667	17.66666667	1.4669	0.8727	4.3077	0.5543	0.5308	2.7094	2.215766667	1.264833333	-0.808858671	0.329487819	1	no	-	--	-	-	-	-
Unigene0001266	120	119	3.9162	4.3209	2.1648	3.0337	4.0221	2.1574	3.4673	3.071066667	-0.175072837	0.733175298	1	no	-	--	-	-	-	-
Unigene0001267	0	1	0	0	0	0	0.1773	0.0834	0.001	0.0869	6.441284272	0.321531235	1	no	-	--	-	-	-	-
Unigene0001268	1673	4310.333333	125.6527	1.1762	33.9102	54.0923	201.2153	114.8611	53.5797	123.3895667	1.203462003	0.193517498	1	no	APOC2	apolipoprotein C-II [Hemibarbus mylodon]	-	-	-	-
Unigene0001269	333	403.3333333	2.098	1.9363	2.4073	2.0784	2.2568	2.5317	2.1472	2.288966667	0.092239877	0.825380479	1	no	ATF2	PREDICTED: cyclic AMP-dependent transcription factor ATF-2-like [Sinocyclocheilus anshuiensis]	ko04010//MAPK signaling pathway//Signal transduction//Environmental Information Processing;ko04261//Adrenergic signaling in cardiomyocytes//Circulatory system//Organismal Systems	-	-	-
Unigene0001270	53.66666667	55.66666667	1.5317	0.8698	1.0363	0.9948	0.9502	1.1912	1.145933333	1.0454	-0.132468051	0.800033988	1	no	-	--	-	-	-	-
Unigene0001271	20.66666667	12.66666667	1.2253	0.3212	1.4165	0.4407	0.4824	0.6597	0.987666667	0.5276	-0.904579656	0.216421629	1	no	-	--	-	-	-	-
Unigene0001272	108.3333333	72.33333333	2.093	0.6466	3.9216	1.3689	0.5805	1.8665	2.2204	1.271966667	-0.803758735	0.228385757	1	no	bsx	brain-specific homeobox protein homolog [Danio rerio]	-	GO:0043226//organelle;GO:0043229//intracellular organelle;GO:0005623//cell;GO:0005622//intracellular;GO:0043231//intracellular membrane-bounded organelle;GO:0044424//intracellular part;GO:0043227//membrane-bounded organelle;GO:0044464//cell part	GO:0003677//DNA binding;GO:0001071//nucleic acid binding transcription factor activity;GO:0005488//binding;GO:1901363//heterocyclic compound binding;GO:0097159//organic cyclic compound binding;GO:0003676//nucleic acid binding	GO:1901576//organic substance biosynthetic process;GO:0009987//cellular process;GO:0046483//heterocycle metabolic process;GO:0006807//nitrogen compound metabolic process;GO:0009058//biosynthetic process;GO:0090304//nucleic acid metabolic process;GO:1901360//organic cyclic compound metabolic process;GO:0006139//nucleobase-containing compound metabolic process;GO:0044238//primary metabolic process;…
Unigene0001273	11.66666667	23.33333333	0.9482	0.9231	0.3276	1.2898	1.1764	1.4379	0.732966667	1.301366667	0.828208011	0.21327934	1	no	-	--	-	-	-	-
Unigene0001274	17.33333333	12	0.943	0.6386	0.5524	0.5229	0.3434	0.4304	0.711333333	0.432233333	-0.718715435	0.300992439	1	no	-	--	-	-	-	-
Unigene0001275	236	234.6666667	22.4168	7.0321	30.2049	16.4475	7.6485	27.0225	19.8846	17.0395	-0.222768539	0.71181821	1	no	-	--	-	-	-	-
Unigene0001276	209	232.3333333	25.4213	11.0801	30.979	18.8104	14.5496	31.8273	22.49346667	21.7291	-0.049877604	0.929894147	1	no	-	--	-	-	-	-
Unigene0001277	35441.33333	37039.33333	209.0907	77.5607	302.2568	164.1201	77.8164	288.6295	196.3027333	176.8553333	-0.150510535	0.778220532	1	no	pim2	PREDICTED: RNA-directed DNA polymerase from mobile element jockey-like [Sinocyclocheilus anshuiensis]	-	-	-	-
Unigene0001278	69.33333333	74	3.1405	4.1276	3.6348	3.9162	2.484	3.801	3.6343	3.4004	-0.095973049	0.861391936	1	no	-	--	-	-	-	-
Unigene0001279	14.33333333	19.66666667	1.486	1.3616	0.906	2.1552	0.976	1.3766	1.2512	1.5026	0.26414859	0.719289593	1	no	-	--	-	-	-	-
Unigene0001280	17.33333333	30	0.6095	1.1328	1.1486	0.7537	2.6811	1.0665	0.963633333	1.500433333	0.638823015	0.348475872	1	no	-	--	-	-	-	-
Unigene0001281	10.33333333	9.666666667	1.1993	0.4865	1.4502	0.7648	0.744	1.0493	1.045333333	0.8527	-0.293852897	0.736055274	1	no	-	--	-	-	-	-
Unigene0001282	2140.333333	2276.333333	14.9053	13.055	12.6496	12.0505	12.9656	13.1129	13.53663333	12.70966667	-0.09094278	0.805690893	1	no	-	--	-	-	-	-
Unigene0001283	151.3333333	89.66666667	12.8069	4.2409	23.2071	6.2962	1.5403	12.5772	13.4183	6.804566667	-0.979626709	0.181275049	1	no	-	--	-	-	-	-
Unigene0001284	23.66666667	23.33333333	2.194	1.3731	2.0304	1.932	1.0937	1.7825	1.865833333	1.602733333	-0.219285716	0.727256102	1	no	-	--	-	-	-	-
Unigene0001285	745	762	6.1578	5.5929	8.9221	4.9624	5.6105	7.9731	6.890933333	6.182	-0.156625746	0.712019622	1	no	-	PREDICTED: uncharacterized protein LOC107758869 [Sinocyclocheilus rhinocerous]	-	-	-	-
Unigene0001286	1.333333333	3.333333333	0.0409	0.0797	0.0424	0.1044	0.1143	0.1433	0.054333333	0.120666667	1.151117733	0.384028194	1	no	-	--	-	-	-	-
Unigene0001287	0.666666667	0	0	0	0.2205	0	0	0	0.0735	0.001	-6.199672345	0.561602982	1	no	-	--	-	-	-	-
Unigene0001288	104.6666667	138.6666667	9.5407	6.9105	7.5946	9.15	7.3865	11.4193	8.015266667	9.3186	0.217362705	0.656730218	1	no	-	--	-	-	-	-
Unigene0001289	18.66666667	14.66666667	1.6168	1.4241	1.2768	0.7855	1.1463	1.0778	1.439233333	1.0032	-0.520691252	0.41598587	1	no	-	--	-	-	-	-
Unigene0001290	169.6666667	117	3.8681	2.193	5.66	2.4762	2.1385	2.4287	3.907033333	2.3478	-0.734764048	0.145449194	1	no	-	PREDICTED: alpha-tubulin N-acetyltransferase 1 isoform X3 [Sinocyclocheilus rhinocerous]	-	-	-	-
Unigene0001291	5	7.333333333	0.1055	0.1541	0	0.1495	0.1636	0.0308	0.086533333	0.114633333	0.405698733	0.760019916	1	no	-	PREDICTED: cell surface glycoprotein 1-like [Sinocyclocheilus anshuiensis]	-	-	-	-
Unigene0001292	582	299.3333333	2.9026	15.3605	2.4343	2.56	4.9425	2.1813	6.899133333	3.227933333	-1.09580436	0.092961052	1	no	CD97	PREDICTED: CD97 antigen-like [Sinocyclocheilus grahami]	-	GO:0016020//membrane;GO:0044425//membrane part;GO:0031224//intrinsic component of membrane	GO:0004872//receptor activity;GO:0043167//ion binding;GO:0004871//signal transducer activity;GO:0043169//cation binding;GO:0046872//metal ion binding;GO:0005488//binding;GO:0060089//molecular transducer activity;GO:0038023//signaling receptor activity	GO:0065007//biological regulation;GO:0050794//regulation of cellular process;GO:0050789//regulation of biological process;GO:0023052//signaling;GO:0007186//G-protein coupled receptor signaling pathway;GO:0044699//single-organism process;GO:0044700//single organism signaling;GO:0044763//single-organism cellular process;GO:0007165//signal transduction;GO:0050896//response to stimulus;GO:0007154//ce…
Unigene0001293	14.66666667	47.33333333	1.5982	0.6668	0.2366	0.7765	5.2052	1.3983	0.833866667	2.46	1.560769692	0.063027736	1	no	-	PREDICTED: aryl hydrocarbon receptor repressor-like [Sinocyclocheilus grahami]	-	GO:0005623//cell;GO:0044424//intracellular part;GO:0043229//intracellular organelle;GO:0044464//cell part;GO:0043231//intracellular membrane-bounded organelle;GO:0043227//membrane-bounded organelle;GO:0043226//organelle;GO:0005622//intracellular	GO:0097159//organic cyclic compound binding;GO:1901363//heterocyclic compound binding;GO:0001076//transcription factor activity, RNA polymerase II transcription factor binding;GO:0005488//binding;GO:0000988//transcription factor activity, protein binding;GO:0000989//transcription factor activity, transcription factor binding;GO:0003676//nucleic acid binding	GO:0034654//nucleobase-containing compound biosynthetic process;GO:1901360//organic cyclic compound metabolic process;GO:0008152//metabolic process;GO:0046483//heterocycle metabolic process;GO:0044271//cellular nitrogen compound biosynthetic process;GO:0009987//cellular process;GO:0006139//nucleobase-containing compound metabolic process;GO:0019438//aromatic compound biosynthetic process;GO:00508…
Unigene0001294	51	55	1.5402	1.0584	2.0659	1.8487	1.2927	1.2419	1.554833333	1.4611	-0.089705021	0.878639066	1	no	-	PREDICTED: zinc finger BED domain-containing protein 1-like [Cyprinus carpio]	-	-	-	-
Unigene0001295	3506	5007	16.5839	15.434	15.2424	21.6836	20.2909	17.5137	15.75343333	19.8294	0.331974738	0.357446847	1	no	SF1	PREDICTED: splicing factor 1 isoform X1 [Danio rerio]	-	-	GO:1901363//heterocyclic compound binding;GO:0043167//ion binding;GO:0003676//nucleic acid binding;GO:0046914//transition metal ion binding;GO:0097159//organic cyclic compound binding;GO:0005488//binding;GO:0043169//cation binding;GO:0046872//metal ion binding	GO:0007275//multicellular organism development;GO:0048731//system development;GO:0043010//camera-type eye development;GO:0044707//single-multicellular organism process;GO:0048856//anatomical structure development;GO:0007423//sensory organ development;GO:0032502//developmental process;GO:0001654//eye development;GO:0032501//multicellular organismal process;GO:0044699//single-organism process;GO:00…
Unigene0001296	18651	22906.66667	88.2501	66.8643	88.4846	82.5728	94.2975	86.734	81.19966667	87.8681	0.113865693	0.751254937	1	no	TDRD6	PREDICTED: tudor domain-containing protein 6-like isoform X3 [Sinocyclocheilus rhinocerous]	-	-	-	-
Unigene0001297	1826.666667	1939.666667	15.624	13.5505	18.3008	15.9421	13.9857	14.2954	15.8251	14.74106667	-0.102373694	0.786753198	1	no	phactr1	PREDICTED: phosphatase and actin regulator 1-like isoform X2 [Sinocyclocheilus rhinocerous]	-	-	-	-
Unigene0001298	11	16	0.1484	1.0834	1.2303	0.6938	1.7949	0.714	0.8207	1.067566667	0.379399307	0.652031916	1	no	-	--	-	-	-	-
Unigene0001299	4	4.333333333	0.5907	0.3834	0.2041	0.4186	0.3665	0.3446	0.392733333	0.376566667	-0.060644753	1	1	no	Tf2-6	PREDICTED: RNA-directed DNA polymerase homolog, partial [Danio rerio]	-	-	-	-
Unigene0001300	7.333333333	6	0.5946	0.3683	0.2241	0.3676	0.2012	0.2837	0.395666667	0.284166667	-0.477548196	0.643201833	1	no	Plekhs1	PREDICTED: pleckstrin homology domain-containing family S member 1-like [Sinocyclocheilus anshuiensis]	-	-	-	-
Unigene0001301	37.66666667	81	1.9565	1.3008	2.1763	1.4606	2.4867	6.3046	1.8112	3.4173	0.915911042	0.146126793	1	no	-	PREDICTED: beta-taxilin isoform X1 [Salmo salar]	-	-	-	-
Unigene0001302	126	114	2.0268	3.1926	3.4225	2.6139	1.886	2.3511	2.880633333	2.283666667	-0.335033952	0.490001	1	no	-	PREDICTED: proteoglycan 4-like [Cyprinus carpio]	-	-	-	-
Unigene0001303	7	6.333333333	1.2948	0.4584	0.732	0.9007	0.9858	0.103	0.8284	0.663166667	-0.32095606	0.807513289	1	no	-	--	-	-	-	-
Unigene0001304	145	132	1.3628	4.1676	0.8291	1.0201	2.4121	1.8144	2.119833333	1.748866667	-0.277530538	0.657173193	1	no	-	--	-	-	-	-
Unigene0001305	997.3333333	1269.333333	6.5139	5.985	4.6276	6.2537	8.0269	5.0882	5.708833333	6.456266667	0.177504224	0.661658344	1	no	Mdc1	PREDICTED: mediator of DNA damage checkpoint protein 1-like isoform X1 [Sinocyclocheilus rhinocerous]	-	-	-	-
Unigene0001306	6038.666667	7706	102.7761	113.2199	79.1587	127.1085	105.5618	99.8101	98.3849	110.8268	0.17179798	0.640593379	1	no	Thoc3	THO complex subunit 3 [Danio rerio]	ko03013//RNA transport//Translation//Genetic Information Processing;ko03040//Spliceosome//Transcription//Genetic Information Processing	-	-	-
Unigene0001307	20.33333333	12.66666667	2.9902	1.7675	1.771	0.9988	0.8944	1.6819	2.176233333	1.1917	-0.868812153	0.18075991	1	no	-	--	-	-	-	-
Unigene0001308	24.33333333	26.33333333	1.6162	1.6242	0.5404	0.7979	1.1643	1.6878	1.260266667	1.216666667	-0.05079507	0.952137685	1	no	-	--	-	-	-	-
Unigene0001309	18.66666667	30.66666667	0.6963	0.2104	0.448	0.245	0.3575	1.3446	0.451566667	0.649033333	0.52335358	0.504315257	1	no	POL	PREDICTED: gypsy retrotransposon integrase-like protein 1 [Danio rerio]	-	-	-	-
Unigene0001310	154	105	12.9722	3.6083	19.688	5.9086	4.1674	11.2822	12.0895	7.1194	-0.763927013	0.228837097	1	no	-	--	-	-	-	-
Unigene0001311	3659.666667	3228.333333	13.1274	8.4616	21.0517	10.2249	7.4343	15.004	14.21356667	10.88773333	-0.384564984	0.385114746	1	no	ptpru	receptor protein tyrosine phosphatase psi [Danio rerio]	-	GO:0016020//membrane;GO:0031224//intrinsic component of membrane;GO:0044425//membrane part	GO:0016788//hydrolase activity, acting on ester bonds;GO:0016791//phosphatase activity;GO:0042578//phosphoric ester hydrolase activity;GO:0004725//protein tyrosine phosphatase activity;GO:0016787//hydrolase activity;GO:0003824//catalytic activity;GO:0004721//phosphoprotein phosphatase activity	GO:0009888//tissue development;GO:0007389//pattern specification process;GO:0006793//phosphorus metabolic process;GO:0051716//cellular response to stimulus;GO:0044707//single-multicellular organism process;GO:0035282//segmentation;GO:0007166//cell surface receptor signaling pathway;GO:0048869//cellular developmental process;GO:0008152//metabolic process;GO:0048856//anatomical structure developmen…
Unigene0001312	70.66666667	82.66666667	5.4309	6.9531	3.3157	5.5663	5.7459	5.012	5.233233333	5.4414	0.0562753	0.921211967	1	no	-	--	-	-	-	-
Unigene0001313	1299	1544.666667	17.9583	19.2577	12.3649	18.8988	18.4068	14.9205	16.52696667	17.4087	0.074986514	0.850204193	1	no	R3hcc1l	PREDICTED: coiled-coil domain-containing protein R3HCC1L-like [Sinocyclocheilus rhinocerous]	-	-	-	-
Unigene0001314	39	42.66666667	0.6955	0.7128	0.7399	0.6069	0.7664	0.7046	0.716066667	0.692633333	-0.048002091	0.928059211	1	no	-	PREDICTED: LOW QUALITY PROTEIN: oxygen-regulated protein 1-like [Sinocyclocheilus grahami]	-	-	-	-
Unigene0001315	10.66666667	25	0.6929	1.1993	0.5586	0.3928	2.2209	2.5598	0.816933333	1.7245	1.077887873	0.17260448	1	no	-	--	-	-	-	-
Unigene0001316	24.33333333	25.66666667	2.01	1.7842	0.4902	1.2566	1.8154	0.9828	1.428133333	1.3516	-0.079462423	0.92963807	1	no	-	--	-	-	-	-
Unigene0001317	53.66666667	64	2.7206	1.4998	1.0532	2.2295	1.3116	1.9788	1.757866667	1.839966667	0.065853983	0.917664656	1	no	ZNF568	PREDICTED: gastrula zinc finger protein XlCGF57.1-like [Sinocyclocheilus grahami]	-	-	-	-
Unigene0001318	227.6666667	300	7.6368	9.1432	5.3555	9.698	10.6443	5.6012	7.3785	8.647833333	0.229011163	0.62278654	1	no	tmem14c	PREDICTED: transmembrane protein 14C-like [Sinocyclocheilus rhinocerous]	-	-	-	-
Unigene0001319	204	176.3333333	6.3997	3.4507	5.3065	4.1437	5.0161	2.412	5.0523	3.857266667	-0.389361419	0.427131019	1	no	Parm1	PREDICTED: cell wall integrity and stress response component 3-like [Cyprinus carpio]	-	-	-	-
Unigene0001320	23.33333333	49	0.6376	0.7162	0.3558	0.7089	1.1638	1.3303	0.569866667	1.067666667	0.905764985	0.12216994	1	no	-	--	-	-	-	-
Unigene0001321	4	8	0.0953	0.8347	0.1975	0.729	0.8865	0.4168	0.375833333	0.677433333	0.849985949	0.421622358	1	no	-	--	-	-	-	-
Unigene0001322	147.6666667	168	4.1818	6.8847	3.9468	4.9141	6.8652	3.4803	5.004433333	5.086533333	0.023476022	0.970324562	1	no	-	--	-	-	-	-
Unigene0001323	1663	2273.666667	19.2029	20.3733	12.4315	24.0905	21.8648	17.0023	17.3359	20.98586667	0.275655308	0.487501888	1	no	mtfr1	PREDICTED: mitochondrial fission regulator 1-like isoform X2 [Sinocyclocheilus grahami]	-	GO:0043231//intracellular membrane-bounded organelle;GO:0005623//cell;GO:0005622//intracellular;GO:0043229//intracellular organelle;GO:0043226//organelle;GO:0044424//intracellular part;GO:0043227//membrane-bounded organelle;GO:0044464//cell part	-	GO:0016043//cellular component organization;GO:0045333//cellular respiration;GO:0008152//metabolic process;GO:0055114//oxidation-reduction process;GO:0071840//cellular component organization or biogenesis;GO:0009987//cellular process;GO:0015980//energy derivation by oxidation of organic compounds;GO:0044710//single-organism metabolic process;GO:0044237//cellular metabolic process;GO:0006091//gene…
Unigene0001324	78.66666667	71.66666667	1.6829	1.5213	1.5366	0.7835	1.9015	1.1744	1.580266667	1.286466667	-0.296753954	0.57612662	1	no	-	--	-	-	-	-
Unigene0001325	8.666666667	6.333333333	0.9994	0.3475	0.5179	0.4249	0.3321	0.4372	0.6216	0.398066667	-0.642976436	0.454600519	1	no	-	--	-	-	-	-
Unigene0001326	813.6666667	963.3333333	6.8502	6.4861	5.8018	6.5165	7.8897	5.6715	6.379366667	6.692566667	0.069146402	0.862927134	1	no	spty2d1	PREDICTED: protein SPT2 homolog isoform X4 [Cyprinus carpio]	-	-	-	-
Unigene0001327	9	2.333333333	0.2296	0.9688	0.8727	0.2603	0.0712	0.1339	0.690366667	0.155133333	-2.153854098	0.026800577	1	no	-	PREDICTED: sentrin-specific protease 5 isoform X3 [Austrofundulus limnaeus]	-	-	-	-
Unigene0001328	583.6666667	523.3333333	5.4685	3.3562	6.6383	4.5751	2.9148	4.5702	5.154333333	4.020033333	-0.358578376	0.415733661	1	no	-	PREDICTED: MORC family CW-type zinc finger protein 3-like [Sinocyclocheilus rhinocerous]	-	-	-	-
Unigene0001329	432.6666667	505.3333333	3.1561	4.0355	2.216	3.4068	3.9587	2.4178	3.135866667	3.2611	0.056494462	0.898707439	1	no	PCSK5	PREDICTED: proprotein convertase subtilisin/kexin type 5-like [Danio rerio]	-	-	-	-
Unigene0001330	5.333333333	9.666666667	0.1059	0.6188	0.9882	1.4412	0.4929	0.7415	0.570966667	0.891866667	0.643421522	0.491651713	1	no	-	--	-	-	-	-
Unigene0001331	544.6666667	541.6666667	7.7759	5.7782	4.6831	4.9134	6.4883	4.7048	6.079066667	5.368833333	-0.179241221	0.670675662	1	no	NR1H3	PREDICTED: oxysterols receptor LXR-alpha-like [Sinocyclocheilus anshuiensis]	ko03320//PPAR signaling pathway//Endocrine system//Organismal Systems	GO:0044464//cell part;GO:0044424//intracellular part;GO:0043229//intracellular organelle;GO:0043226//organelle;GO:0005622//intracellular;GO:0043231//intracellular membrane-bounded organelle;GO:0043227//membrane-bounded organelle;GO:0005623//cell	GO:0003700//transcription factor activity, sequence-specific DNA binding;GO:0097159//organic cyclic compound binding;GO:0003676//nucleic acid binding;GO:0005488//binding;GO:0003677//DNA binding;GO:0043169//cation binding;GO:0001071//nucleic acid binding transcription factor activity;GO:1901363//heterocyclic compound binding;GO:0046914//transition metal ion binding;GO:0004871//signal transducer ac…	GO:0044271//cellular nitrogen compound biosynthetic process;GO:0051716//cellular response to stimulus;GO:0010467//gene expression;GO:0032774//RNA biosynthetic process;GO:0044238//primary metabolic process;GO:0050896//response to stimulus;GO:0044260//cellular macromolecule metabolic process;GO:0034654//nucleobase-containing compound biosynthetic process;GO:0009058//biosynthetic process;GO:0043170/…
Unigene0001332	4485.333333	6243.333333	11.5374	13.376	8.1911	11.996	16.961	12.1159	11.03483333	13.69096667	0.311159474	0.417276285	1	no	BPTF	PREDICTED: nucleosome-remodeling factor subunit BPTF isoform X4 [Danio rerio]	-	-	-	-
Unigene0001333	33.33333333	36.33333333	1.2039	1.0621	1.5207	1.0875	0.6651	1.8433	1.262233333	1.198633333	-0.074588228	0.924651531	1	no	-	--	-	-	-	-
Unigene0001334	48.66666667	73.66666667	1.3216	0.6433	1.9451	0.3371	1.4758	3.3764	1.303333333	1.729766667	0.408371335	0.583421809	1	no	IGHV3-23	immunoglobulin HY heavy chain [Ctenopharyngodon idella]	-	-	-	-
Unigene0001335	665.3333333	222	3.8709	105.518	24.1429	5.0233	26.7938	9.2096	44.5106	13.67556667	-1.702548334	0.048262838	1	no	IGHV3-23	immunoglobulin HY heavy chain [Ctenopharyngodon idella]	-	-	-	-
Unigene0001336	12	13.33333333	0.859	1.2544	0.4452	0.3652	1.532	0.6889	0.852866667	0.862033333	0.015423442	1	1	no	-	--	-	-	-	-
Unigene0001337	6424.666667	7727.333333	69.7151	111.3194	58.6815	62.225	141.074	56.5929	79.90533333	86.63063333	0.116585464	0.795307128	1	no	CTSA	PREDICTED: lysosomal protective protein-like [Sinocyclocheilus grahami]	ko04142//Lysosome//Transport and catabolism//Cellular Processes	-	GO:0004180//carboxypeptidase activity;GO:0016787//hydrolase activity;GO:0070011//peptidase activity, acting on L-amino acid peptides;GO:0008233//peptidase activity;GO:0008238//exopeptidase activity;GO:0003824//catalytic activity	GO:0043170//macromolecule metabolic process;GO:0044238//primary metabolic process;GO:0010467//gene expression;GO:0006508//proteolysis;GO:0016485//protein processing;GO:0008152//metabolic process;GO:0051604//protein maturation;GO:0071704//organic substance metabolic process;GO:0019538//protein metabolic process
Unigene0001338	3	2.666666667	0.1246	0.1213	0.323	0.106	0.116	0.2181	0.189633333	0.1467	-0.370343709	0.732274145	1	no	-	--	-	-	-	-
Unigene0001339	137	296	4.112	0.0105	0.3244	1.7435	4.9813	1.9074	1.4823	2.8774	0.956928329	0.377472038	1	no	ETNK1	PREDICTED: ethanolamine kinase 1-like isoform X2 [Sinocyclocheilus anshuiensis]	ko01100//Metabolic pathways//Global and Overview//Metabolism;ko00564//Glycerophospholipid metabolism//Lipid metabolism//Metabolism	-	GO:0016740//transferase activity;GO:0003824//catalytic activity	GO:0044237//cellular metabolic process;GO:0006793//phosphorus metabolic process;GO:0008152//metabolic process;GO:0009987//cellular process;GO:0006796//phosphate-containing compound metabolic process
Unigene0001340	13	21	0.5414	0.4393	0.795	0.7672	0.6718	1.0659	0.5919	0.834966667	0.496365147	0.461030909	1	no	-	--	-	-	-	-
Unigene0001341	9.333333333	16.66666667	0.291	1.7001	0.7039	0.4949	1.625	2.2069	0.898333333	1.442266667	0.683015163	0.45198146	1	no	-	--	-	-	-	-
Unigene0001342	20.33333333	24.33333333	0.9751	1.0253	0.3639	0.3316	1.1615	1.0579	0.7881	0.850333333	0.109649792	0.898505626	1	no	-	--	-	-	-	-
Unigene0001343	430	448.6666667	10.2796	13.5869	7.22	9.9327	12.0188	6.9623	10.36216667	9.637933333	-0.104529966	0.814702542	1	no	immp2l	PREDICTED: mitochondrial inner membrane protease subunit 2 isoform X2 [Sinocyclocheilus rhinocerous]	ko03060//Protein export//Folding, sorting and degradation//Genetic Information Processing	GO:0005740//mitochondrial envelope;GO:0005623//cell;GO:0005739//mitochondrion;GO:0005622//intracellular;GO:0044429//mitochondrial part;GO:0031090//organelle membrane;GO:0043226//organelle;GO:0005743//mitochondrial inner membrane;GO:0043227//membrane-bounded organelle;GO:0031975//envelope;GO:0044446//intracellular organelle part;GO:0044424//intracellular part;GO:0005737//cytoplasm;GO:0043229//intr…	GO:0003824//catalytic activity;GO:0070011//peptidase activity, acting on L-amino acid peptides;GO:0008233//peptidase activity;GO:0016787//hydrolase activity	GO:0071704//organic substance metabolic process;GO:0008152//metabolic process;GO:0016485//protein processing;GO:0019538//protein metabolic process;GO:0010467//gene expression;GO:0006508//proteolysis;GO:0043170//macromolecule metabolic process;GO:0051604//protein maturation;GO:0044238//primary metabolic process
Unigene0001344	105.6666667	76.33333333	1.4743	0.9317	1.7291	0.8796	0.6137	1.1088	1.378366667	0.867366667	-0.668245812	0.199873722	1	no	GNAT2	PREDICTED: guanine nucleotide-binding protein G(t) subunit alpha-2-like isoform X1 [Sinocyclocheilus anshuiensis]	ko04744//Phototransduction//Sensory system//Organismal Systems	-	GO:0001883//purine nucleoside binding;GO:0017111//nucleoside-triphosphatase activity;GO:0005515//protein binding;GO:0016818//hydrolase activity, acting on acid anhydrides, in phosphorus-containing anhydrides;GO:1901265//nucleoside phosphate binding;GO:0017076//purine nucleotide binding;GO:0032550//purine ribonucleoside binding;GO:0016462//pyrophosphatase activity;GO:1901363//heterocyclic compound…	GO:0006725//cellular aromatic compound metabolic process;GO:0046434//organophosphate catabolic process;GO:0009056//catabolic process;GO:0009259//ribonucleotide metabolic process;GO:0044710//single-organism metabolic process;GO:0044281//small molecule metabolic process;GO:0006195//purine nucleotide catabolic process;GO:0044700//single organism signaling;GO:0007187//G-protein coupled receptor signa…
Unigene0001345	19	29.33333333	0.9583	1.0178	0.4966	2.037	0.2837	0.9909	0.824233333	1.103866667	0.421441208	0.566433145	1	no	-	PREDICTED: OTU domain-containing protein 6B isoform X1 [Danio rerio]	-	-	-	-
Unigene0001346	212	287.3333333	5.9651	9.0262	6.6773	10.3172	8.2468	7.3365	7.222866667	8.6335	0.257374004	0.563199468	1	no	-	--	-	-	-	-
Unigene0001347	85.33333333	132.6666667	2.5902	1.8401	1.5479	3.2339	2.5188	2.4295	1.992733333	2.7274	0.452777639	0.358570628	1	no	-	--	-	-	-	-
Unigene0001348	77.33333333	62	5.0074	2.878	6.2531	3.4367	3.2	3.2727	4.712833333	3.303133333	-0.512759456	0.32651295	1	no	-	--	-	-	-	-
Unigene0001349	23.33333333	18	0.9905	0.7547	1.2944	0.8055	0.561	0.6782	1.0132	0.681566667	-0.571992298	0.345935026	1	no	-	--	-	-	-	-
Unigene0001350	44	62	2.8176	1.3965	2.6018	1.96	3.3369	3.1823	2.271966667	2.8264	0.315023986	0.569591825	1	no	-	--	-	-	-	-
Unigene0001351	14.33333333	11.33333333	0.3724	1.0072	0.386	0.1759	0.9242	0.181	0.588533333	0.427033333	-0.462775441	0.617895396	1	no	tenm4	PREDICTED: teneurin-4-like [Cyprinus carpio]	-	GO:0044425//membrane part;GO:0005623//cell;GO:0005622//intracellular;GO:0043227//membrane-bounded organelle;GO:0043229//intracellular organelle;GO:0016021//integral component of membrane;GO:0042995//cell projection;GO:0016020//membrane;GO:0043231//intracellular membrane-bounded organelle;GO:0044424//intracellular part;GO:0044464//cell part;GO:0043226//organelle;GO:0031224//intrinsic component of …	GO:0005488//binding;GO:0005515//protein binding;GO:0046983//protein dimerization activity	GO:0044699//single-organism process;GO:0044763//single-organism cellular process;GO:0048468//cell development;GO:0007275//multicellular organism development;GO:0030154//cell differentiation;GO:0098609//cell-cell adhesion;GO:0010720//positive regulation of cell development;GO:0048699//generation of neurons;GO:0048709//oligodendrocyte differentiation;GO:0014015//positive regulation of gliogenesis;G…
Unigene0001352	0	0	0	0	0	0	0	0	0.001	0.001	0	notest	notest	notest	-	--	-	-	-	-
Unigene0001353	9468	12443.33333	91.6896	109.5598	82.1155	126.65	112.7051	89.6341	94.45496667	109.6630667	0.215379159	0.556177154	1	no	mcm5	DNA replication licensing factor MCM5 [Danio rerio]	ko04110//Cell cycle//Cell growth and death//Cellular Processes;ko03030//DNA replication//Replication and repair//Genetic Information Processing	GO:0043226//organelle;GO:0043227//membrane-bounded organelle;GO:0005623//cell;GO:0043231//intracellular membrane-bounded organelle;GO:0044424//intracellular part;GO:0043229//intracellular organelle;GO:0044464//cell part;GO:0043234//protein complex;GO:0005622//intracellular;GO:0032991//macromolecular complex	GO:0003824//catalytic activity;GO:0032549//ribonucleoside binding;GO:0016462//pyrophosphatase activity;GO:0016818//hydrolase activity, acting on acid anhydrides, in phosphorus-containing anhydrides;GO:0097159//organic cyclic compound binding;GO:0001882//nucleoside binding;GO:0017111//nucleoside-triphosphatase activity;GO:0016787//hydrolase activity;GO:0036094//small molecule binding;GO:0003676//n…	GO:0044699//single-organism process;GO:0006996//organelle organization;GO:0051276//chromosome organization;GO:0044767//single-organism developmental process;GO:0071840//cellular component organization or biogenesis;GO:0071103//DNA conformation change;GO:0032501//multicellular organismal process;GO:0032502//developmental process;GO:0009987//cellular process;GO:0044707//single-multicellular organis…
Unigene0001354	24	18.33333333	0.3813	0.4283	1.3376	0.773	0.2729	0.3593	0.715733333	0.4684	-0.611681095	0.40674881	1	no	-	--	-	-	-	-
Unigene0001355	6.333333333	3	0.1778	0.5192	0.4299	0.1008	0.2205	0.1555	0.375633333	0.158933333	-1.240903357	0.182195222	1	no	NXPE3	PREDICTED: NXPE family member 3-like [Danio rerio]	-	-	-	-
Unigene0001356	12.66666667	14.33333333	1.285	0.2085	1.2579	0.6677	1.0629	0.9994	0.917133333	0.91	-0.011264944	1	1	no	-	--	-	-	-	-
Unigene0001357	11	18.66666667	0.8063	0.6642	0.5786	0.7383	0.7503	1.5738	0.683033333	1.0208	0.579672343	0.415255134	1	no	-	--	-	-	-	-
Unigene0001358	207.3333333	221.6666667	4.0857	4.5057	2.6233	3.5353	4.5926	2.5624	3.738233333	3.563433333	-0.069088688	0.88565087	1	no	-	--	-	-	-	-
Unigene0001359	6	11.33333333	0.8937	0.1582	0.421	0.6217	0.9828	0.853	0.490966667	0.819166667	0.738531932	0.378265377	1	no	PEG10	PREDICTED: large proline-rich protein BAG6-like [Cyprinus carpio]	-	-	-	-
Unigene0001360	0	1.666666667	0	0	0	0.1841	0	0.1263	0.001	0.103466667	6.693022247	0.131654899	1	no	-	PREDICTED: uncharacterized protein LOC107708282 [Sinocyclocheilus rhinocerous]	-	-	-	-
Unigene0001361	22	19.66666667	0.4455	0.9639	0.2052	0.3367	0.691	0.2815	0.5382	0.4364	-0.302491289	0.693449091	1	no	GIMAP7	PREDICTED: GTPase IMAP family member 4-like, partial [Danio rerio]	-	-	-	-
Unigene0001362	286.3333333	305	1.6487	2.7051	1.2595	1.3236	2.4266	1.6149	1.8711	1.788366667	-0.065244104	0.893374933	1	no	Rnf165	PREDICTED: RING finger protein 165-like [Sinocyclocheilus rhinocerous]	-	-	GO:0005488//binding;GO:0043169//cation binding;GO:0043167//ion binding	-
Unigene0001363	90.33333333	61.33333333	1.6948	1.2806	3.9853	1.3335	0.7297	2.014	2.320233333	1.359066667	-0.77165367	0.203678771	1	no	-	--	-	-	-	-
Unigene0001364	39.33333333	42.33333333	1.1574	1.7897	1.0585	1.4472	0.9503	1.3999	1.3352	1.2658	-0.077006387	0.896232156	1	no	ZNF568	PREDICTED: gastrula zinc finger protein XlCGF8.2DB-like, partial [Sinocyclocheilus rhinocerous]	-	-	-	-
Unigene0001365	1816.666667	1903.666667	27.2678	32.5587	18.9619	26.3637	29.9331	17.1606	26.2628	24.4858	-0.101075404	0.805894318	1	no	THUMPD3	PREDICTED: THUMP domain-containing protein 3-like isoform X2 [Sinocyclocheilus anshuiensis]	-	-	-	-
Unigene0001366	83.33333333	127	2.2906	1.8351	1.8548	2.0692	4.0187	2.0459	1.9935	2.711266667	0.443663411	0.383803441	1	no	Esm1	PREDICTED: endothelial cell-specific molecule 1-like [Sinocyclocheilus anshuiensis]	-	-	GO:0019838//growth factor binding;GO:0005515//protein binding;GO:0005488//binding	GO:0009987//cellular process;GO:0044763//single-organism cellular process;GO:0016049//cell growth;GO:0044699//single-organism process;GO:0040007//growth
Unigene0001367	1972	1405.333333	8.0522	4.7386	17.3146	4.8408	3.4762	10.2215	10.03513333	6.1795	-0.69949777	0.190085371	1	no	Itga9	PREDICTED: integrin alpha-9-like [Sinocyclocheilus anshuiensis]	ko04510//Focal adhesion//Cellular commiunity//Cellular Processes;ko04810//Regulation of actin cytoskeleton//Cell motility//Cellular Processes;ko04514//Cell adhesion molecules (CAMs)//Signaling molecules and interaction//Environmental Information Processing;ko04512//ECM-receptor interaction//Signaling molecules and interaction//Environmental Information Processing	-	-	-
Unigene0001368	29.66666667	39.66666667	1.3178	0.6571	0.8995	0.9838	1.2562	1.153	0.958133333	1.131	0.23930059	0.687915269	1	no	-	--	-	-	-	-
Unigene0001369	529.3333333	747.6666667	7.2475	11.6881	5.9769	11.6275	11.245	8.3813	8.304166667	10.41793333	0.327161806	0.451818901	1	no	-	PREDICTED: structural maintenance of chromosomes protein 5-like [Sinocyclocheilus rhinocerous]	-	-	-	-
Unigene0001370	129	176.3333333	6.5587	8.0912	4.6703	9.4074	8.6188	5.3879	6.440066667	7.8047	0.277267555	0.570228912	1	no	-	PREDICTED: PWWP domain-containing protein MUM1-like [Cyprinus carpio]	-	-	-	-
Unigene0001371	23.66666667	27	1.5247	1.7043	0.7609	1.6324	1.4188	0.9882	1.329966667	1.346466667	0.017788427	1	1	no	-	PREDICTED: uncharacterized protein LOC109197426 [Oreochromis niloticus]	-	-	-	-
Unigene0001372	38.66666667	16.66666667	0.9904	0.2799	2.5166	0.1901	0	1.202	1.2623	0.464033333	-1.443754475	0.177170386	1	no	-	--	-	-	-	-
Unigene0001373	162	215.6666667	3.6565	5.0751	3.2521	5.2514	4.1612	4.6691	3.994566667	4.6939	0.2327481	0.612284976	1	no	-	--	-	-	-	-
Unigene0001374	7	0.666666667	0.8594	0.6085	0.162	0	0.1454	0	0.5433	0.048466667	-3.486684278	0.012374825	1	no	-	--	-	-	-	-
Unigene0001375	0.333333333	3.333333333	0	0	0.0773	0	0.2777	0.3916	0.025766667	0.2231	3.114112695	0.097913191	1	no	-	--	-	-	-	-
Unigene0001376	18.33333333	39.33333333	1.2944	0.2585	0.2752	0.254	2.4707	0.8421	0.609366667	1.188933333	0.964285332	0.269917372	1	no	-	PREDICTED: coxsackievirus and adenovirus receptor homolog [Sinocyclocheilus rhinocerous]	-	-	-	-
Unigene0001377	97.66666667	54.33333333	2.2038	1.0728	2.5493	0.435	1.1718	1.2568	1.941966667	0.954533333	-1.024650953	0.079658734	1	no	-	PREDICTED: SLAM family member 5-like [Sinocyclocheilus grahami]	-	-	-	-
Unigene0001378	10.66666667	9	0.779	0.7	0.4347	0.4076	0.6691	0.367	0.6379	0.481233333	-0.406593702	0.573236324	1	no	-	PREDICTED: protein FAM188B2-like isoform X1 [Sinocyclocheilus rhinocerous]	-	-	-	-
Unigene0001379	0	0	0	0	0	0	0	0	0.001	0.001	0	notest	notest	notest	-	--	-	-	-	-
Unigene0001380	41.66666667	42.33333333	1.0755	2.0942	1.0103	1.0287	1.3761	1.3821	1.393333333	1.2623	-0.142485618	0.821172013	1	no	-	--	-	-	-	-
Unigene0001381	24	14.33333333	2.303	0.531	1.5704	1.1852	0.3948	0.6893	1.468133333	0.756433333	-0.956698153	0.199698101	1	no	-	--	-	-	-	-
Unigene0001382	77	38	0.6396	7.0321	0.8578	0.7357	0.8402	2.2053	2.843166667	1.2604	-1.173617013	0.162767143	1	no	-	Ig kappa chain V-IV region JI precursor [Salmo salar]	-	-	-	-
Unigene0001383	1	0.333333333	0	0.3755	0	0.1093	0	0	0.125166667	0.036433333	-1.780519507	0.711647727	1	no	-	Ig kappa chain V-IV region JI precursor [Salmo salar]	-	-	-	-
Unigene0001384	843	114	3.8994	87.2763	4.2417	4.4314	4.9578	2.3308	31.8058	3.906666667	-3.025279806	0.001350581	0.431884123	no	IGLL5	immunoglobulin light chain, partial [Danio rerio]	-	-	-	-
Unigene0001385	22	31	0.7955	0.4518	0.962	0.9582	0.7094	1.0441	0.736433333	0.9039	0.295608244	0.638369571	1	no	-	PREDICTED: nesprin-1-like [Sinocyclocheilus grahami]	-	-	-	-
Unigene0001386	63.66666667	73	3.0589	1.6963	2.6889	2.0411	3.0626	2.4392	2.481366667	2.5143	0.019021864	0.978256667	1	no	-	--	-	-	-	-
Unigene0001387	877.6666667	1042	7.0424	7.1886	5.7577	6.8458	8.0432	6.1483	6.6629	7.012433333	0.073764909	0.852924402	1	no	-	PREDICTED: uncharacterized protein KIAA2013 homolog [Sinocyclocheilus anshuiensis]	-	-	-	-
Unigene0001388	0	42.66666667	0	0	0	2.5958	2.912	3.1386	0.001	2.882133333	11.49292136	5.89E-12	4.27E-08	yes	ORF3	--	-	-	-	-
Unigene0001389	16	26	0.5505	0.5955	1.8385	1.0401	1.4799	1.7125	0.994833333	1.410833333	0.504020814	0.484056849	1	no	-	--	-	-	-	-
Unigene0001390	733.6666667	866.6666667	14.4431	11.1785	14.315	16.5318	9.1055	15.4957	13.3122	13.711	0.042584783	0.920386048	1	no	-	--	-	-	-	-
Unigene0001391	136	146	5.1081	5.8926	3.2274	3.4209	6.4462	3.8264	4.7427	4.5645	-0.055251779	0.912684063	1	no	-	PREDICTED: potassium voltage-gated channel subfamily V member 1 isoform X4 [Austrofundulus limnaeus]	-	-	-	-
Unigene0001392	4	6.666666667	0.1203	0	0.1745	0.1636	0.2238	0.0421	0.098266667	0.143166667	0.542921607	0.662746527	1	no	-	--	-	-	-	-
Unigene0001393	113.3333333	80.66666667	0.6739	2.343	1.0477	0.8594	1.0861	0.6422	1.354866667	0.862566667	-0.651443012	0.252240728	1	no	-	PREDICTED: probable E3 ubiquitin-protein ligase RNF144A-A [Cyprinus carpio]	-	-	-	-
Unigene0001394	854.3333333	1069.333333	7.7123	7.4434	6.2067	8.0867	8.7111	6.8643	7.1208	7.887366667	0.147504379	0.708889349	1	no	Ccdc85b	PREDICTED: coiled-coil domain-containing protein 85B-like [Sinocyclocheilus anshuiensis]	-	-	-	-
Unigene0001395	1796.666667	2968.333333	24.8112	20.9679	34.7131	77.6298	12.2951	23.9631	26.83073333	37.96266667	0.500694851	0.373382628	1	no	ZP3	zona pellucid glycoprotein 3 [Culter alburnus]	-	-	-	-
Unigene0001396	7.666666667	6.333333333	0.4871	0.7706	0.1262	0.6212	0.3966	0	0.4613	0.339266667	-0.443285602	0.734428368	1	no	-	--	-	-	-	-
Unigene0001397	35.33333333	51.66666667	1.9819	1.2863	3.1746	2.7063	3.0178	2.5222	2.1476	2.748766667	0.356059137	0.534174973	1	no	-	--	-	-	-	-
Unigene0001398	9.333333333	19.66666667	0.4777	0.6717	0.3301	0.9928	1.136	0.6501	0.493166667	0.9263	0.909404223	0.188684706	1	no	-	--	-	-	-	-
Unigene0001399	28.33333333	20.33333333	1.7779	2.8649	0.5084	1.4595	1.3121	0.5364	1.717066667	1.102666667	-0.638949321	0.380084683	1	no	-	--	-	-	-	-
Unigene0001400	49.66666667	74.33333333	1.2809	0.4425	0.3283	0.8197	0.6408	1.2412	0.6839	0.900566667	0.39704769	0.52844321	1	no	pol	LReO_3 [Oryzias latipes]	-	-	-	-
Unigene0001401	73.33333333	92.66666667	7.9532	4.2097	4.882	7.4842	4.0956	7.2287	5.681633333	6.2695	0.142044661	0.788483161	1	no	BR2	PREDICTED: integumentary mucin A.1-like isoform X1 [Xenopus tropicalis]	ko04512//ECM-receptor interaction//Signaling molecules and interaction//Environmental Information Processing	-	-	-
Unigene0001402	12.66666667	13.66666667	0.6722	1.3089	0.5574	0.6287	0.8757	0.941	0.846166667	0.815133333	-0.05390579	1	1	no	-	--	-	-	-	-
Unigene0001403	1642	2236.666667	14.8929	13.0223	10.8257	15.9031	18.1878	12.6727	12.91363333	15.58786667	0.271528527	0.481943228	1	no	Mapre3	microtubule-associated protein RP/EB family member 3 [Danio rerio]	-	-	GO:0008092//cytoskeletal protein binding;GO:0015631//tubulin binding;GO:0005488//binding;GO:0005515//protein binding	-
Unigene0001404	1754.666667	1369.333333	8.1899	5.079	12.0985	5.2295	5.0807	6.9655	8.4558	5.758566667	-0.554231491	0.196816294	1	no	tshz1	PREDICTED: LOW QUALITY PROTEIN: teashirt homolog 1-like [Cyprinus carpio]	-	GO:0043231//intracellular membrane-bounded organelle;GO:0005622//intracellular;GO:0043227//membrane-bounded organelle;GO:0043229//intracellular organelle;GO:0005623//cell;GO:0043226//organelle;GO:0044464//cell part;GO:0044424//intracellular part	GO:0003676//nucleic acid binding;GO:1901363//heterocyclic compound binding;GO:0043169//cation binding;GO:0043167//ion binding;GO:0097159//organic cyclic compound binding;GO:0003677//DNA binding;GO:0005488//binding	GO:0090304//nucleic acid metabolic process;GO:0032774//RNA biosynthetic process;GO:1901360//organic cyclic compound metabolic process;GO:0071704//organic substance metabolic process;GO:1901362//organic cyclic compound biosynthetic process;GO:0044699//single-organism process;GO:0008152//metabolic process;GO:0034654//nucleobase-containing compound biosynthetic process;GO:0006351//transcription, DNA…
Unigene0001405	1150	1302	10.5731	12.3369	7.0501	9.382	12.0998	8.7326	9.9867	10.07146667	0.012193854	0.977148532	1	no	tcf3	transcription factor E2-alpha [Danio rerio]	-	-	-	GO:0061061//muscle structure development;GO:0042692//muscle cell differentiation;GO:0044763//single-organism cellular process;GO:0032502//developmental process;GO:0044699//single-organism process;GO:0048856//anatomical structure development;GO:0051146//striated muscle cell differentiation;GO:0009987//cellular process;GO:0048869//cellular developmental process;GO:0044767//single-organism developme…
Unigene0001406	5.666666667	1	0	1.8732	0	0.0962	0.2106	0	0.6244	0.102266667	-2.610134555	0.187436858	1	no	-	PREDICTED: interferon-induced very large GTPase 1-like [Danio rerio]	-	-	-	-
Unigene0001407	272.6666667	311	8.5924	3.4073	4.137	3.8115	7.9406	4.662	5.3789	5.471366667	0.024590074	0.963579529	1	no	-	--	-	-	-	-
Unigene0001408	46.33333333	50	1.6434	1.7487	1.941	1.9171	1.2803	1.8391	1.7777	1.678833333	-0.082552866	0.892709964	1	no	-	--	-	-	-	-
Unigene0001409	9	3.666666667	0.5518	1.0147	0.0635	0	0.2852	0.3218	0.543333333	0.202333333	-1.425103543	0.202661912	1	no	-	--	-	-	-	-
Unigene0001410	19.66666667	13.33333333	0.8743	1.8525	0.2665	0.8745	0.7178	0.225	0.997766667	0.605766667	-0.719940279	0.365943444	1	no	-	--	-	-	-	-
Unigene0001411	38	34.66666667	2.9983	2.2935	2.8857	1.8816	2.5907	2.1236	2.725833333	2.198633333	-0.310090328	0.572451383	1	no	-	--	-	-	-	-
Unigene0001412	38	47.66666667	2.1694	0.792	2.2486	2.0366	1.6823	1.9772	1.736666667	1.8987	0.128691102	0.828994658	1	no	-	--	-	-	-	-
Unigene0001413	107	126.6666667	5.6257	6.8923	7.8619	7.4165	5.2937	8.4063	6.7933	7.038833333	0.051223759	0.91744279	1	no	-	--	-	-	-	-
Unigene0001414	285.6666667	368	4.8764	2.7908	5.8132	4.4771	4.1897	6.5019	4.493466667	5.056233333	0.170234142	0.711927034	1	no	-	--	-	-	-	-
Unigene0001415	13.66666667	11	0.1589	0.4641	1.5922	0.3603	0.2465	0.9269	0.7384	0.511233333	-0.530420647	0.593279109	1	no	-	--	-	-	-	-
Unigene0001416	4.666666667	6.333333333	0.1269	0.2883	0.1754	0.036	0.1575	0.5182	0.196866667	0.237233333	0.269087879	0.85879925	1	no	-	PREDICTED: ATP-binding cassette sub-family B member 8, mitochondrial-like [Xenopus tropicalis]	-	-	-	-
Unigene0001417	8.333333333	5	0.1088	0.1059	1.1837	0.185	0.1012	0.4282	0.466133333	0.238133333	-0.968973104	0.411214824	1	no	-	--	-	-	-	-
Unigene0001418	851.3333333	1069.666667	11.5664	13.634	10.165	13.8148	15.3002	10.2895	11.78846667	13.13483333	0.156021816	0.6994999	1	no	POGLUT1	PREDICTED: protein O-glucosyltransferase 1 [Sinocyclocheilus grahami]	ko00514//Other types of O-glycan biosynthesis//Glycan biosynthesis and metabolism//Metabolism	-	-	-
Unigene0001419	23.33333333	28.66666667	0.9276	0.7162	0.5968	1.4414	0.506	0.4478	0.746866667	0.7984	0.09626101	0.883869617	1	no	-	--	-	-	-	-
Unigene0001420	827	977.3333333	10.0239	13.5296	10.2765	13.1375	13.1856	9.0685	11.27666667	11.7972	0.065103808	0.873871642	1	no	nabp2-b	PREDICTED: SOSS complex subunit B1-A-like [Cyprinus carpio]	-	-	-	-
Unigene0001421	19	12.33333333	0.9809	1.0112	1.3157	0.3434	1.2886	0.3029	1.1026	0.644966667	-0.773613001	0.282943157	1	no	ADORA1	PREDICTED: adenosine receptor A1-like [Danio rerio]	ko04080//Neuroactive ligand-receptor interaction//Signaling molecules and interaction//Environmental Information Processing	-	-	-
Unigene0001422	873.6666667	1033.333333	10.4084	13.0021	9.4363	9.4572	15.3799	9.8198	10.94893333	11.5523	0.077389786	0.852488798	1	no	SLC35F6	PREDICTED: solute carrier family 35 member F6-like isoform X1 [Sinocyclocheilus rhinocerous]	-	GO:0031224//intrinsic component of membrane;GO:0016020//membrane;GO:0044425//membrane part	-	GO:0051234//establishment of localization;GO:0051179//localization
Unigene0001423	873.3333333	805.6666667	22.3398	13.2003	5.7559	18.8593	10.394	4.2774	13.76533333	11.1769	-0.300519445	0.603413745	1	no	cyp26a1	PREDICTED: cytochrome P450 26A1 [Cyprinus carpio]	ko01100//Metabolic pathways//Global and Overview//Metabolism;ko00830//Retinol metabolism//Metabolism of cofactors and vitamins//Metabolism	GO:0042175//nuclear outer membrane-endoplasmic reticulum membrane network;GO:0044464//cell part;GO:0043229//intracellular organelle;GO:0043231//intracellular membrane-bounded organelle;GO:0012505//endomembrane system;GO:0043227//membrane-bounded organelle;GO:0005622//intracellular;GO:0005623//cell;GO:0044424//intracellular part;GO:0043226//organelle;GO:0016020//membrane	GO:0003824//catalytic activity;GO:0046872//metal ion binding;GO:0016491//oxidoreductase activity;GO:1901363//heterocyclic compound binding;GO:0043167//ion binding;GO:0004497//monooxygenase activity;GO:0046906//tetrapyrrole binding;GO:0043169//cation binding;GO:0005488//binding;GO:0097159//organic cyclic compound binding;GO:0046914//transition metal ion binding	GO:0006721//terpenoid metabolic process;GO:0007420//brain development;GO:0050794//regulation of cellular process;GO:0009987//cellular process;GO:0023052//signaling;GO:0010033//response to organic substance;GO:0060322//head development;GO:0050789//regulation of biological process;GO:0042221//response to chemical;GO:0044712//single-organism catabolic process;GO:0044248//cellular catabolic process;G…
Unigene0001424	16	3	0.5505	2.2628	0.0634	0.104	0.0569	0.3211	0.9589	0.160666667	-2.577309724	0.023013448	1	no	WT1	PREDICTED: Wilms tumor protein homolog [Sinocyclocheilus rhinocerous]	-	-	-	-
Unigene0001425	954.3333333	663	20.6797	22.3886	28.6649	18.578	12.6356	12.3601	23.91106667	14.52456667	-0.719183368	0.082190637	1	no	-	--	-	-	-	-
Unigene0001426	399.6666667	356	1.535	1.225	2.4784	1.4007	1.4526	1.2333	1.746133333	1.3622	-0.358225189	0.416761818	1	no	SEMA5B	PREDICTED: semaphorin-5B [Sinocyclocheilus rhinocerous]	-	-	-	-
Unigene0001427	6	16.33333333	0.1981	0.3858	0.6161	1.5162	0.4302	0.8668	0.4	0.937733333	1.229177717	0.123262046	1	no	-	PREDICTED: uncharacterized protein LOC109204176 [Oreochromis niloticus]	-	-	-	-
Unigene0001428	36.66666667	32.33333333	1.4229	1.6056	0.5028	1.0998	0.9629	0.7073	1.1771	0.923333333	-0.350313414	0.577746131	1	no	-	--	-	-	-	-
Unigene0001429	449.3333333	77	0.9798	8.4456	0.5234	0.4422	0.547	0.5539	3.316266667	0.514366667	-2.688690964	0.001032333	0.389289215	no	CDH26	PREDICTED: B-cadherin-like [Sinocyclocheilus anshuiensis]	-	-	-	-
Unigene0001430	1576.666667	1616.666667	15.0646	17.9393	18.4581	17.4742	14.775	14.1483	17.154	15.46583333	-0.149460455	0.694281935	1	no	U2AF1	PREDICTED: splicing factor U2AF 35 kDa subunit-like isoform X1 [Cyprinus carpio]	ko03040//Spliceosome//Transcription//Genetic Information Processing	-	-	-
Unigene0001431	93.33333333	63.66666667	0.9622	4.9548	1.076	0.9472	2.7096	0.7089	2.331	1.455233333	-0.67969851	0.351543254	1	no	-	--	-	-	-	-
Unigene0001432	0.333333333	0.666666667	0	0.107	0	0	0.2045	0	0.035666667	0.068166667	0.934490047	1	1	no	-	--	-	-	-	-
Unigene0001433	315.3333333	805	1.9942	1.5394	2.0792	1.2741	9.4266	2.292	1.870933333	4.3309	1.210908709	0.050666087	1	no	ABCB1	PREDICTED: multidrug resistance protein 1-like isoform X1 [Sinocyclocheilus grahami]	ko02010//ABC transporters//Membrane transport//Environmental Information Processing	GO:0016020//membrane;GO:0044425//membrane part;GO:0031224//intrinsic component of membrane	GO:0001883//purine nucleoside binding;GO:0022857//transmembrane transporter activity;GO:0016462//pyrophosphatase activity;GO:0001882//nucleoside binding;GO:0003824//catalytic activity;GO:0097367//carbohydrate derivative binding;GO:1901363//heterocyclic compound binding;GO:0022804//active transmembrane transporter activity;GO:0005488//binding;GO:0005215//transporter activity;GO:0015399//primary ac…	GO:0051234//establishment of localization;GO:0044763//single-organism cellular process;GO:0051179//localization;GO:0009987//cellular process;GO:0044699//single-organism process
Unigene0001434	17.66666667	19.66666667	0.7188	1.2919	0.9169	0.5641	1.4406	0.9192	0.975866667	0.974633333	-0.00182448	1	1	no	-	--	-	-	-	-
Unigene0001435	92.33333333	116.6666667	1.5678	1.4374	1.2148	1.8506	1.6289	1.2252	1.406666667	1.568233333	0.156859732	0.74947601	1	no	Tdg	PREDICTED: G/T mismatch-specific thymine DNA glycosylase-like [Sinocyclocheilus grahami]	ko03410//Base excision repair//Replication and repair//Genetic Information Processing	-	-	-
Unigene0001436	156.3333333	205.6666667	4.1087	4.6044	5.2084	4.7751	4.566	6.75	4.6405	5.3637	0.208948288	0.648998145	1	no	-	--	-	-	-	-
Unigene0001437	12.33333333	9	0.8118	1.0867	1.8932	1.0353	0.9443	0.4439	1.2639	0.807833333	-0.64575274	0.377168471	1	no	-	--	-	-	-	-
Unigene0001438	41	47.33333333	1.8199	3.0307	0.9928	1.9953	1.3816	2.598	1.9478	1.991633333	0.032106517	0.985085662	1	no	-	--	-	-	-	-
Unigene0001439	88.33333333	60.66666667	0.9818	0.4324	1.7324	1.1527	0.5438	0.1636	1.048866667	0.620033333	-0.758413609	0.283516918	1	no	-	--	-	-	-	-
Unigene0001440	5.333333333	5.333333333	0.9196	0.1791	0.3813	0.5473	0.5134	0.2414	0.493333333	0.434033333	-0.184756926	0.919742552	1	no	-	Transposable element Tcb2 transposase [Larimichthys crocea]	-	-	-	-
Unigene0001441	144.6666667	110	3.0916	2.0066	10.1117	1.6648	3.9317	4.5083	5.069966667	3.368266667	-0.589969901	0.359535164	1	no	-	PREDICTED: sterile alpha motif domain-containing protein 3-like isoform X1 [Oreochromis niloticus]	-	-	-	-
Unigene0001442	141	46.66666667	12.8181	3.2231	20.5004	2.4539	3.7916	4.3077	12.18053333	3.517733333	-1.791859277	0.005884569	0.849178348	no	-	--	-	-	-	-
Unigene0001443	0.333333333	0.333333333	0	0.0886	0	0	0.0847	0	0.029533333	0.028233333	-0.064944729	1	1	no	-	--	-	-	-	-
Unigene0001444	15.66666667	12.66666667	1.6149	0.6289	0.8034	0.8238	0.6612	0.6782	1.015733333	0.721066667	-0.494317136	0.508632261	1	no	-	--	-	-	-	-
Unigene0001445	680.6666667	966	4.9999	4.5946	2.554	4.738	6.3737	4.2597	4.0495	5.1238	0.339470377	0.432950829	1	no	Pik3c2g	PREDICTED: phosphatidylinositol 4-phosphate 3-kinase C2 domain-containing subunit gamma-like isoform X2 [Cyprinus carpio]	ko01100//Metabolic pathways//Global and Overview//Metabolism;ko04070//Phosphatidylinositol signaling system//Signal transduction//Environmental Information Processing;ko00562//Inositol phosphate metabolism//Carbohydrate metabolism//Metabolism	-	GO:0003824//catalytic activity;GO:0043167//ion binding;GO:0016740//transferase activity;GO:0005488//binding;GO:0043168//anion binding;GO:0016772//transferase activity, transferring phosphorus-containing groups	GO:0009987//cellular process;GO:0006793//phosphorus metabolic process;GO:0044699//single-organism process;GO:0044763//single-organism cellular process;GO:0006796//phosphate-containing compound metabolic process;GO:0008152//metabolic process;GO:0044237//cellular metabolic process
Unigene0001446	271	341.6666667	3.0804	2.5867	2.9733	3.204	2.896	3.4731	2.880133333	3.191033333	0.147888077	0.727954336	1	no	-	--	-	-	-	-
Unigene0001447	15.66666667	16.66666667	1.1804	0.7901	1.5293	1.2545	1.167	0.8391	1.1666	1.086866667	-0.102135013	0.924419483	1	no	-	--	-	-	-	-
Unigene0001448	10	10.66666667	0.8871	0.2467	0.7881	0.1077	0.8254	0.887	0.640633333	0.6067	-0.078515555	0.955819134	1	no	pol	PREDICTED: LOW QUALITY PROTEIN: ankyrin-2-like [Cyprinus carpio]	-	-	-	-
Unigene0001449	206	204.6666667	2.1353	0.9536	0.9543	2.143	0.8628	0.4913	1.347733333	1.1657	-0.209338519	0.727047609	1	no	MYH4	myosin heavy chain b [Culter alburnus]	ko04530//Tight junction//Cellular commiunity//Cellular Processes	GO:0043229//intracellular organelle;GO:0043228//non-membrane-bounded organelle;GO:0015629//actin cytoskeleton;GO:0005623//cell;GO:0005622//intracellular;GO:0044424//intracellular part;GO:0043232//intracellular non-membrane-bounded organelle;GO:0043226//organelle;GO:0044464//cell part;GO:0005856//cytoskeleton	GO:0001882//nucleoside binding;GO:0017111//nucleoside-triphosphatase activity;GO:0016818//hydrolase activity, acting on acid anhydrides, in phosphorus-containing anhydrides;GO:0016787//hydrolase activity;GO:0016817//hydrolase activity, acting on acid anhydrides;GO:0005488//binding;GO:0005515//protein binding;GO:0016462//pyrophosphatase activity;GO:0032550//purine ribonucleoside binding;GO:0001883…	-
Unigene0001450	72.33333333	100.3333333	1.8592	2.9531	2.2651	2.0522	4.7045	2.0547	2.359133333	2.937133333	0.3161518	0.559638719	1	no	-	--	-	-	-	-
Unigene0001451	2.333333333	2.666666667	0.3784	0.0921	0.1961	0	0.5281	0.1655	0.2222	0.2312	0.057282581	1	1	no	-	PREDICTED: chromobox protein homolog 7-like [Sinocyclocheilus anshuiensis]	-	-	-	-
Unigene0001452	63	70.33333333	2.1877	3.2271	0.7902	1.4091	2.6835	2.1461	2.068333333	2.079566667	0.007814226	1	1	no	-	--	-	-	-	-
Unigene0001453	12.66666667	18.66666667	1.1711	0.9647	1.3072	1.685	1.2574	1.4975	1.147666667	1.479966667	0.366861002	0.611880325	1	no	-	--	-	-	-	-
Unigene0001454	4.666666667	3	0.373	0.3632	1.031	0.3172	0.5785	0.1088	0.589066667	0.334833333	-0.81498776	0.53154953	1	no	-	--	-	-	-	-
Unigene0001455	952.6666667	1312.666667	12.8621	16.7051	10.6154	15.1159	19.8866	14.2856	13.3942	16.42936667	0.294668452	0.467735161	1	no	Fbxl3	PREDICTED: F-box/LRR-repeat protein 3-like [Lates calcarifer]	-	-	-	-
Unigene0001456	29.66666667	45	1.1351	1.0437	0.6209	1.0187	1.4083	1.3517	0.933233333	1.259566667	0.43261774	0.44603743	1	no	-	--	-	-	-	-
Unigene0001457	12.66666667	12.33333333	0.7737	0.7533	0.7403	0.6578	0.8861	0.4166	0.755766667	0.6535	-0.209753653	0.813975472	1	no	-	--	-	-	-	-
Unigene0001458	21.33333333	16.33333333	1.404	1.0562	1.6537	0.5969	0.4157	1.731	1.3713	0.914533333	-0.584436565	0.432545811	1	no	-	--	-	-	-	-
Unigene0001459	39.33333333	47.33333333	3.4683	2.5171	1.4379	2.5199	3.1687	2.2621	2.474433333	2.650233333	0.09902121	0.872927754	1	no	-	--	-	-	-	-
Unigene0001460	8201.333333	8876.666667	91.614	71.97	100.6542	86.1881	62.4823	101.2828	88.0794	83.31773333	-0.08018105	0.831475495	1	no	trip13	PREDICTED: pachytene checkpoint protein 2 homolog isoform X1 [Sinocyclocheilus anshuiensis]	-	-	GO:0003824//catalytic activity;GO:1901363//heterocyclic compound binding;GO:0036094//small molecule binding;GO:0001883//purine nucleoside binding;GO:0016817//hydrolase activity, acting on acid anhydrides;GO:0032550//purine ribonucleoside binding;GO:0097159//organic cyclic compound binding;GO:0005488//binding;GO:0097367//carbohydrate derivative binding;GO:0016787//hydrolase activity;GO:0016818//hy…	GO:0070192//chromosome organization involved in meiotic cell cycle;GO:0032502//developmental process;GO:0048609//multicellular organismal reproductive process;GO:0044703//multi-organism reproductive process;GO:0000003//reproduction;GO:0044260//cellular macromolecule metabolic process;GO:0022414//reproductive process;GO:0050896//response to stimulus;GO:0006950//response to stress;GO:0006281//DNA r…
Unigene0001461	7.666666667	8.333333333	0	0.5804	1.4123	0.2896	0.634	0.9686	0.664233333	0.630733333	-0.074659944	1	1	no	-	--	-	-	-	-
Unigene0001462	512	592.3333333	10.5461	12.6006	7.4528	10.6308	11.9323	8.895	10.19983333	10.48603333	0.039923459	0.925695442	1	no	si:dkey-184p18.2	PREDICTED: UPF0711 protein C18orf21 homolog isoform X3 [Sinocyclocheilus anshuiensis]	-	-	-	-
Unigene0001463	27.66666667	35	1.6614	2.9495	3.5454	2.4928	3.2739	3.3348	2.718766667	3.033833333	0.158189492	0.808018693	1	no	-	--	-	-	-	-
Unigene0001464	1033	1520.333333	11.2454	17.0122	8.4152	17.6467	18.7605	11.6383	12.22426667	16.01516667	0.389690891	0.364033068	1	no	tmeff1	PREDICTED: tomoregulin-1-like [Sinocyclocheilus rhinocerous]	-	-	-	-
Unigene0001465	399	315	0.8884	1.8714	3.3137	1.3484	1.8588	1.0144	2.0245	1.4072	-0.524738255	0.311624579	1	no	Col11a1	PREDICTED: collagen alpha-1(XI) chain-like [Sinocyclocheilus anshuiensis]	-	-	GO:0005198//structural molecule activity	-
Unigene0001466	39.33333333	39.66666667	4.0441	3.3968	1.8903	3.1687	2.3612	2.7752	3.1104	2.768366667	-0.168065085	0.774448888	1	no	ZNF879	PREDICTED: zinc finger protein 664-like [Sinocyclocheilus rhinocerous]	-	-	-	-
Unigene0001467	208.6666667	209	1.7932	2.0025	1.7128	1.1808	2.4048	1.3459	1.836166667	1.643833333	-0.159632983	0.735196413	1	no	LOXL1	PREDICTED: lysyl oxidase homolog 1-like [Sinocyclocheilus grahami]	-	-	GO:0016491//oxidoreductase activity;GO:0016638//oxidoreductase activity, acting on the CH-NH2 group of donors;GO:0003824//catalytic activity	GO:0032501//multicellular organismal process;GO:0048731//system development;GO:0032502//developmental process;GO:0044710//single-organism metabolic process;GO:0007275//multicellular organism development;GO:0008152//metabolic process;GO:0048568//embryonic organ development;GO:0048513//animal organ development;GO:0044707//single-multicellular organism process;GO:0044699//single-organism process;GO:…
Unigene0001468	101.3333333	107.3333333	2.7368	2.9867	0.9379	1.839	2.7521	1.7379	2.220466667	2.109666667	-0.073847847	0.899683359	1	no	Eva1b	PREDICTED: protein eva-1 homolog B isoform X1 [Larimichthys crocea]	-	-	-	-
Unigene0001469	154.6666667	210.6666667	3.2711	3.1407	4.1153	3.6827	3.9676	4.9543	3.509033333	4.201533333	0.259842278	0.566023133	1	no	-	--	-	-	-	-
Unigene0001470	190.6666667	144	2.0649	1.0489	3.3965	1.3167	0.825	2.1111	2.1701	1.4176	-0.614311016	0.269459155	1	no	-	PREDICTED: acidic leucine-rich nuclear phosphoprotein 32 family member B-like isoform X1 [Salmo salar]	-	-	GO:0003824//catalytic activity;GO:0097159//organic cyclic compound binding;GO:0003676//nucleic acid binding;GO:1901363//heterocyclic compound binding;GO:0005488//binding	GO:0090304//nucleic acid metabolic process;GO:0006807//nitrogen compound metabolic process;GO:0044237//cellular metabolic process;GO:0006725//cellular aromatic compound metabolic process;GO:0034641//cellular nitrogen compound metabolic process;GO:0044260//cellular macromolecule metabolic process;GO:0009987//cellular process;GO:0044238//primary metabolic process;GO:1901360//organic cyclic compound…
Unigene0001471	16.33333333	24.66666667	0.8623	0.7595	0.383	0.803	0.9935	0.8982	0.668266667	0.898233333	0.426666347	0.505218619	1	no	-	--	-	-	-	-
Unigene0001472	0	0	0	0	0	0	0	0	0.001	0.001	0	notest	notest	notest	-	--	-	-	-	-
Unigene0001473	61.33333333	22.66666667	1.7624	2.1749	0.5917	0.211	0.6236	0.6732	1.509666667	0.5026	-1.586747462	0.017512403	1	no	-	--	-	-	-	-
Unigene0001474	96.66666667	63	1.9814	1.3932	3.0806	1.1044	0.4712	2.0611	2.151733333	1.212233333	-0.827831876	0.174363881	1	no	-	--	-	-	-	-
Unigene0001475	98.33333333	110.6666667	5.7921	2.9559	5.132	4.2098	4.8247	4.6999	4.626666667	4.578133333	-0.015213682	0.985101439	1	no	-	--	-	-	-	-
Unigene0001476	7	20.66666667	0.8524	0.1185	0.3155	1.2941	0.3399	1.6514	0.4288	1.095133333	1.352729719	0.130080209	1	no	-	--	-	-	-	-
Unigene0001477	54	69	2.775	1.7084	2.1572	1.7695	3.3038	2.4636	2.213533333	2.5123	0.182657651	0.743759685	1	no	-	--	-	-	-	-
Unigene0001478	62.66666667	67	1.0437	0.6986	1.3523	0.7349	1.0623	1.113	1.031533333	0.970066667	-0.088634638	0.876427829	1	no	-	--	-	-	-	-
Unigene0001479	5	7	0.7025	0.1368	0.2184	0.4181	0.1961	0.6761	0.352566667	0.4301	0.286776049	0.790075224	1	no	-	--	-	-	-	-
Unigene0001480	455.6666667	476	7.2693	8.3937	3.4898	5.6655	8.9142	3.3896	6.384266667	5.989766667	-0.09202111	0.85340582	1	no	gulp1	PTB domain-containing engulfment adapter protein 1 [Danio rerio]	-	-	-	GO:0051179//localization;GO:0009987//cellular process;GO:0016192//vesicle-mediated transport;GO:0016265//death;GO:0044763//single-organism cellular process;GO:0006897//endocytosis;GO:0008219//cell death;GO:0012501//programmed cell death;GO:0044699//single-organism process;GO:0006810//transport;GO:0051234//establishment of localization
[truncated: 71,969 more rows]
