# Supplementary material for: Comparative Analysis of miRNA-mRNA Regulation in the Testes of Gobiocypris rarus following 17α-Methyltestosterone Exposure
Source: Int J Mol Sci. 2023 Feb 20;24(4):4239. doi: 10.3390/ijms24044239 (PMC9968023; doi:10.3390/ijms24044239)
Supplement: Supplementary file 1 [file ijms-24-04239-s001.zip › Table S3-Con-M-VS-MT100-M.annot.xls]

GeneID	Con-M_count	MT100-M_count	Con-M1_rpkm	Con-M2_rpkm	Con-M3_rpkm	MT100-M1_rpkm	MT100-M2_rpkm	MT100-M3_rpkm	Con-M_rpkm	MT100-M_rpkm	log2 Ratio(MT100-M/Con-M)	Pvalue	FDR	significant	Symbol	Description	Pathway	GO Component	GO Function	GO Process
Unigene0000001	10.33333333	14.33333333	0.5282	1.6161	0.1564	0.8824	0.8529	0.9417	0.7669	0.892333333	0.218544264	0.802505006	1	no	Npr1	PREDICTED: atrial natriuretic peptide receptor 1-like [Cyprinus carpio]	ko04270//Vascular smooth muscle contraction//Circulatory system//Organismal Systems;ko00230//Purine metabolism//Nucleotide metabolism//Metabolism	GO:0031224//intrinsic component of membrane;GO:0016020//membrane;GO:0044425//membrane part	GO:0005488//binding;GO:0016772//transferase activity, transferring phosphorus-containing groups;GO:0036094//small molecule binding;GO:0001883//purine nucleoside binding;GO:0009975//cyclase activity;GO:0016301//kinase activity;GO:1901363//heterocyclic compound binding;GO:0016740//transferase activity;GO:0016829//lyase activity;GO:0032549//ribonucleoside binding;GO:0003824//catalytic activity;GO:00…	GO:0009152//purine ribonucleotide biosynthetic process;GO:1901135//carbohydrate derivative metabolic process;GO:0006164//purine nucleotide biosynthetic process;GO:0006753//nucleoside phosphate metabolic process;GO:1901566//organonitrogen compound biosynthetic process;GO:0044711//single-organism biosynthetic process;GO:1901293//nucleoside phosphate biosynthetic process;GO:0044237//cellular metabol…
Unigene0000002	20.33333333	18	1.8678	0.3264	0.7446	0.5601	0.406	1.1207	0.9796	0.6956	-0.493934841	0.544065698	1	no	-	--	-	-	-	-
Unigene0000003	8	12.33333333	0.6671	0.6495	0.2766	0.8322	0.7541	0.4683	0.531066667	0.684866667	0.366930165	0.637579143	1	no	Gpr64	PREDICTED: cell wall protein DAN4-like [Sinocyclocheilus anshuiensis]	-	-	-	-
Unigene0000004	1803	2614	12.4757	15.7661	16.5117	13.23	19.813	20.7938	14.91783333	17.9456	0.266592146	0.50938328	1	no	PDLIM5	PDZ and LIM domain 5 isoform 2 [Danio rerio]	-	-	GO:0043169//cation binding;GO:0005488//binding;GO:0043167//ion binding	-
Unigene0000005	13.33333333	17	0.949	0.294	0.4918	0.8744	0.6907	0.2692	0.578266667	0.611433333	0.080460263	0.930137386	1	no	ZCCHC24	Zinc finger CCHC domain-containing protein 24 [Dicentrarchus labrax]	-	-	GO:0003723//RNA binding;GO:0005488//binding;GO:0097159//organic cyclic compound binding;GO:0003676//nucleic acid binding;GO:1901363//heterocyclic compound binding;GO:0046872//metal ion binding;GO:0043169//cation binding;GO:0043167//ion binding	-
Unigene0000006	5367.333333	4859	13.8341	9.1379	33.1667	6.2055	10.9052	23.7537	18.7129	13.62146667	-0.458151104	0.411280605	1	no	EML6	PREDICTED: echinoderm microtubule-associated protein-like 6 isoform X3 [Sinocyclocheilus grahami]	-	-	-	-
Unigene0000007	31	71	0.5751	2.0333	0.1569	4.6725	0.0855	0.2833	0.921766667	1.680433333	0.866359806	0.438528792	1	no	-	--	-	-	-	-
Unigene0000008	87.33333333	78.33333333	0.9859	0.9307	2.0437	0.7803	1.0553	1.0836	1.3201	0.973066667	-0.440036665	0.424913236	1	no	-	PREDICTED: tripartite motif-containing protein 35-like [Sinocyclocheilus grahami]	-	-	-	-
Unigene0000009	59.33333333	89	1.3846	0.8464	0.6341	1.9205	1.2739	0.3768	0.955033333	1.1904	0.317823438	0.62506465	1	no	-	--	-	-	-	-
Unigene0000010	10.33333333	13.33333333	0.823	0.7284	0.7755	0.7	0.6342	1.1088	0.775633333	0.814333333	0.070244652	0.95080071	1	no	-	TCR beta variable region, partial [Ictalurus punctatus]	-	-	-	-
Unigene0000011	461	625.6666667	7.2969	8.8992	5.7506	10.7085	8.071	5.8777	7.315566667	8.219066667	0.168004955	0.708347581	1	no	-	--	-	-	-	-
Unigene0000012	16	16.33333333	0.8295	1.7305	0.2456	1.663	0.6697	0.0462	0.9352	0.792966667	-0.238014708	0.825411228	1	no	-	--	-	-	-	-
Unigene0000013	16.66666667	25	1.1702	0.2278	0.566	1.1556	0.8818	0.3955	0.654666667	0.810966667	0.308882092	0.696041314	1	no	-	PREDICTED: disks large homolog 5-like [Sinocyclocheilus grahami]	-	-	-	-
Unigene0000014	17.33333333	20.33333333	0.9388	1.0102	0.6146	1.4254	0.6981	0.3469	0.854533333	0.823466667	-0.053426517	0.970033249	1	no	-	--	-	-	-	-
Unigene0000015	452	664	3.6917	21.625	2.3001	25.9522	3.6922	3.2032	9.2056	10.9492	0.250241802	0.767766236	1	no	Samsn1	PREDICTED: SAM domain-containing protein SAMSN-1-like isoform X3 [Sinocyclocheilus anshuiensis]	-	-	-	-
Unigene0000016	266	521	2.1068	2.1108	1.9058	2.2399	3.4927	4.207	2.041133333	3.3132	0.698854867	0.122186986	1	no	C3orf58	PREDICTED: deleted in autism protein 1 homolog [Sinocyclocheilus anshuiensis]	-	-	-	-
Unigene0000017	79.33333333	108.3333333	2.0318	4.5114	1.8843	5.1413	2.0817	2.1687	2.809166667	3.130566667	0.156281603	0.795480308	1	no	-	--	-	-	-	-
Unigene0000018	365	561.3333333	4.2762	4.4627	2.8595	6.1135	5.5371	3.2362	3.866133333	4.962266667	0.360107873	0.434047973	1	no	GATSL3	GATS-like protein 3 [Danio rerio]	-	-	-	-
Unigene0000019	6	30.66666667	0.7223	0	0.3743	3.8481	0.3402	0.1878	0.365533333	1.4587	1.996608327	0.090727579	1	no	-	pol-like protein [Tetraodon nigroviridis]	ko04080//Neuroactive ligand-receptor interaction//Signaling molecules and interaction//Environmental Information Processing	-	-	-
Unigene0000020	14	21	0.6008	0.8774	0.6227	0.9368	1.3204	0.4296	0.7003	0.8956	0.354881441	0.617049677	1	no	-	--	-	-	-	-
Unigene0000021	3.666666667	15.66666667	0.291	0.425	0.0754	1.7018	0.9595	0.1703	0.2638	0.943866667	1.83913851	0.063236907	1	no	-	--	-	-	-	-
Unigene0000022	1289.333333	1654	5.7155	5.3755	8.8119	5.6217	5.5998	9.4895	6.6343	6.903666667	0.057418556	0.895439048	1	no	fgfr1a	PREDICTED: LOW QUALITY PROTEIN: fibroblast growth factor receptor 1-A-like [Cyprinus carpio]	ko04010//MAPK signaling pathway//Signal transduction//Environmental Information Processing;ko04810//Regulation of actin cytoskeleton//Cell motility//Cellular Processes;ko04520//Adherens junction//Cellular commiunity//Cellular Processes	GO:0043226//organelle;GO:0043227//membrane-bounded organelle;GO:0044425//membrane part;GO:0005622//intracellular;GO:0005623//cell;GO:0044424//intracellular part;GO:0016020//membrane;GO:0043229//intracellular organelle;GO:0044444//cytoplasmic part;GO:0005737//cytoplasm;GO:0043231//intracellular membrane-bounded organelle;GO:0031982//vesicle;GO:0044464//cell part;GO:0031224//intrinsic component of …	GO:0001883//purine nucleoside binding;GO:0004888//transmembrane signaling receptor activity;GO:0019199//transmembrane receptor protein kinase activity;GO:0032549//ribonucleoside binding;GO:0019838//growth factor binding;GO:0097367//carbohydrate derivative binding;GO:0004714//transmembrane receptor protein tyrosine kinase activity;GO:0016772//transferase activity, transferring phosphorus-containin…	GO:0048646//anatomical structure formation involved in morphogenesis;GO:0009653//anatomical structure morphogenesis;GO:0050790//regulation of catalytic activity;GO:0048736//appendage development;GO:0050789//regulation of biological process;GO:0065009//regulation of molecular function;GO:0009888//tissue development;GO:0045859//regulation of protein kinase activity;GO:0043405//regulation of MAP kin…
Unigene0000023	4.666666667	12.66666667	0.2968	0.0722	0.692	0.8676	1.2578	0.2893	0.353666667	0.8049	1.186419305	0.217425494	1	no	-	--	-	-	-	-
Unigene0000024	1091	2020	3.8372	6.42	3.1697	9.9676	5.8466	4.668	4.475633333	6.8274	0.60924443	0.188511293	1	no	myo1c	PREDICTED: unconventional myosin-Ic-like [Cyprinus carpio]	-	-	-	-
Unigene0000025	332.6666667	320.6666667	3.127	2.5209	3.3432	2.2563	2.8694	2.0896	2.997033333	2.4051	-0.31743825	0.475885793	1	no	-	--	-	-	-	-
Unigene0000026	3276	4011.333333	21.1966	21.0839	18.0782	23.3797	20.1563	17.5051	20.11956667	20.34703333	0.016219227	0.966287338	1	no	Uso1	PREDICTED: general vesicular transport factor p115 isoform X3 [Sinocyclocheilus anshuiensis]	-	GO:0012505//endomembrane system;GO:0044424//intracellular part;GO:0044422//organelle part;GO:0005623//cell;GO:0044464//cell part;GO:0044446//intracellular organelle part;GO:0005794//Golgi apparatus;GO:0043226//organelle;GO:0043229//intracellular organelle;GO:0044444//cytoplasmic part;GO:0043227//membrane-bounded organelle;GO:0043231//intracellular membrane-bounded organelle;GO:0005737//cytoplasm;…	-	GO:0061024//membrane organization;GO:1902589//single-organism organelle organization;GO:0016050//vesicle organization;GO:0046907//intracellular transport;GO:0044801//single-organism membrane fusion;GO:0048193//Golgi vesicle transport;GO:0044765//single-organism transport;GO:0071840//cellular component organization or biogenesis;GO:0016043//cellular component organization;GO:0051649//establishment…
Unigene0000027	12.66666667	17.66666667	0.8583	0.6565	0.8261	0.7648	1.2127	0.7651	0.7803	0.9142	0.228480919	0.763447308	1	no	-	--	-	-	-	-
Unigene0000028	16.66666667	32.66666667	0.932	0.1512	0.8855	0.878	1.3534	0.9693	0.656233333	1.0669	0.701144177	0.337300565	1	no	-	--	-	-	-	-
Unigene0000029	46	60.66666667	0.5741	1.6022	0.4364	0.9698	1.3699	0.612	0.8709	0.9839	0.17600462	0.79671012	1	no	-	--	-	-	-	-
Unigene0000030	11	14.33333333	0.3153	0.9209	0.8497	0.8358	0.4158	0.9346	0.6953	0.728733333	0.067755394	0.956532234	1	no	-	--	-	-	-	-
Unigene0000031	673.3333333	637.3333333	11.6081	2.8288	15.3744	6.6488	7.3075	8.9638	9.9371	7.640033333	-0.379245951	0.490087671	1	no	-	PREDICTED: leucine-rich repeat and IQ domain-containing protein 3 isoform X1 [Danio rerio]	-	-	-	-
Unigene0000032	13	12	0.6083	1.0022	0.194	0.2189	1.1019	0.1825	0.6015	0.5011	-0.2634662	0.795476058	1	no	pol	PREDICTED: RNA-directed DNA polymerase from mobile element jockey-like [Poecilia formosa]	-	-	-	-
Unigene0000033	701	881.6666667	8.5216	6.7577	5.7743	7.9148	9.2232	5.0789	7.017866667	7.405633333	0.077590583	0.860640754	1	no	MKX	PREDICTED: homeobox protein Mohawk-like isoform X2 [Sinocyclocheilus rhinocerous]	-	GO:0043231//intracellular membrane-bounded organelle;GO:0043227//membrane-bounded organelle;GO:0005622//intracellular;GO:0005623//cell;GO:0043229//intracellular organelle;GO:0044424//intracellular part;GO:0044464//cell part;GO:0043226//organelle	GO:0001071//nucleic acid binding transcription factor activity;GO:1901363//heterocyclic compound binding;GO:0003676//nucleic acid binding;GO:0005488//binding;GO:0097159//organic cyclic compound binding	GO:0071704//organic substance metabolic process;GO:0044707//single-multicellular organism process;GO:0032774//RNA biosynthetic process;GO:0009653//anatomical structure morphogenesis;GO:1901362//organic cyclic compound biosynthetic process;GO:1901360//organic cyclic compound metabolic process;GO:0044249//cellular biosynthetic process;GO:0044699//single-organism process;GO:0044237//cellular metabol…
Unigene0000034	48.66666667	56.33333333	0.6879	1.494	1.7003	1.1552	1.8941	0.7636	1.294066667	1.270966667	-0.025985749	0.975683978	1	no	gag-pol	PREDICTED: RNA-directed DNA polymerase from mobile element jockey-like [Danio rerio]	-	-	-	-
Unigene0000035	8	11.33333333	0.2927	0.7835	0.6825	0.4563	1.5161	0.2283	0.586233333	0.733566667	0.323453082	0.72798107	1	no	-	--	-	-	-	-
Unigene0000036	130.3333333	201.6666667	1.7665	2.2357	0.9024	2.8627	2.068	1.3779	1.634866667	2.102866667	0.363184398	0.496450166	1	no	LGI2	PREDICTED: leucine-rich repeat LGI family member 2-like [Cyprinus carpio]	-	-	-	-
Unigene0000037	12.66666667	26.33333333	0.6408	0.7624	1.3283	1.4432	2.8166	0.6109	0.9105	1.623566667	0.834435703	0.255991949	1	no	-	PREDICTED: junctional adhesion molecule C-like isoform X2 [Sinocyclocheilus rhinocerous]	-	-	-	-
Unigene0000038	12.33333333	15.33333333	1.1416	1.3337	0.3155	0.712	0.7169	1.4247	0.930266667	0.9512	0.032104382	1	1	no	-	--	-	-	-	-
Unigene0000039	22	15.33333333	1.5407	1.4285	1.901	0.1716	2.4187	0.4578	1.6234	1.016033333	-0.676070785	0.413520708	1	no	-	--	-	-	-	-
Unigene0000040	30	30.33333333	1.1035	1.0744	1.0331	0.9436	1.1065	0.6664	1.070333333	0.9055	-0.241273618	0.671715702	1	no	-	--	-	-	-	-
Unigene0000041	36.33333333	46.33333333	1.1035	0.9465	0.817	0.4097	1.5592	1.1477	0.955666667	1.038866667	0.1204311	0.864566948	1	no	-	--	-	-	-	-
Unigene0000042	0	3	0	0	0	0	0.1954	0.3236	0.001	0.173	7.434628228	0.05164235	1	no	-	--	-	-	-	-
Unigene0000043	101	136.3333333	1.0605	1.497	1.4701	1.4779	1.8854	1.1891	1.342533333	1.517466667	0.176706917	0.729492061	1	no	Bscl2	PREDICTED: seipin-like isoform X2 [Sinocyclocheilus anshuiensis]	-	-	-	-
Unigene0000044	22.66666667	30.33333333	0.5701	0.7064	2.31	0.8082	0.9276	2.1023	1.1955	1.279366667	0.09781567	0.917275228	1	no	-	--	-	-	-	-
Unigene0000045	7.666666667	6.666666667	0.4893	0.5359	0.3804	0.4769	0.1728	0.334	0.468533333	0.3279	-0.514895789	0.597692849	1	no	-	--	-	-	-	-
Unigene0000046	2951.666667	3043.666667	70.6537	71.8433	98.8297	55.0629	77.0343	73.9954	80.44223333	68.69753333	-0.227694838	0.564988575	1	no	POLR2F	PREDICTED: DNA-directed RNA polymerases I, II, and III subunit RPABC2 [Sinocyclocheilus rhinocerous]	ko01100//Metabolic pathways//Global and Overview//Metabolism;ko00230//Purine metabolism//Nucleotide metabolism//Metabolism;ko00240//Pyrimidine metabolism//Nucleotide metabolism//Metabolism;ko04623//Cytosolic DNA-sensing pathway//Immune system//Organismal Systems;ko03020//RNA polymerase//Transcription//Genetic Information Processing	GO:1990234//transferase complex;GO:0044446//intracellular organelle part;GO:0044464//cell part;GO:0070013//intracellular organelle lumen;GO:0044428//nuclear part;GO:0044424//intracellular part;GO:0061695//transferase complex, transferring phosphorus-containing groups;GO:0043234//protein complex;GO:0031974//membrane-enclosed lumen;GO:0044451//nucleoplasm part;GO:0044422//organelle part;GO:0005622/…	GO:0003676//nucleic acid binding;GO:0097159//organic cyclic compound binding;GO:0003899//DNA-directed RNA polymerase activity;GO:0034062//RNA polymerase activity;GO:0016772//transferase activity, transferring phosphorus-containing groups;GO:1901363//heterocyclic compound binding;GO:0016779//nucleotidyltransferase activity;GO:0016740//transferase activity;GO:0003824//catalytic activity;GO:0005488/…	GO:0071704//organic substance metabolic process;GO:0043170//macromolecule metabolic process;GO:0010467//gene expression;GO:0008152//metabolic process
Unigene0000047	2362.333333	2810.666667	16.0638	14.4937	16.7393	13.0835	15.4439	17.8334	15.7656	15.4536	-0.028837116	0.940870411	1	no	fam91a1	protein FAM91A1 [Danio rerio]	-	-	-	-
Unigene0000048	696.3333333	898.6666667	5.5026	3.5642	6.5159	4.3592	4.6815	7.3151	5.194233333	5.451933333	0.069857097	0.876953971	1	no	PTK2B	PREDICTED: protein-tyrosine kinase 2-beta-like [Sinocyclocheilus grahami]	ko04020//Calcium signaling pathway//Signal transduction//Environmental Information Processing;ko04912//GnRH signaling pathway//Endocrine system//Organismal Systems	GO:0043226//organelle;GO:0043229//intracellular organelle;GO:0044424//intracellular part;GO:0005924//cell-substrate adherens junction;GO:0044464//cell part;GO:0030054//cell junction;GO:0005622//intracellular;GO:0030055//cell-substrate junction;GO:0043228//non-membrane-bounded organelle;GO:0005623//cell;GO:0043232//intracellular non-membrane-bounded organelle;GO:0005912//adherens junction;GO:00701…	GO:0097159//organic cyclic compound binding;GO:0016740//transferase activity;GO:0016772//transferase activity, transferring phosphorus-containing groups;GO:0005488//binding;GO:1901363//heterocyclic compound binding;GO:0032549//ribonucleoside binding;GO:0001883//purine nucleoside binding;GO:0003824//catalytic activity;GO:0097367//carbohydrate derivative binding;GO:0016301//kinase activity;GO:00600…	GO:0050789//regulation of biological process;GO:0043170//macromolecule metabolic process;GO:0008152//metabolic process;GO:0044238//primary metabolic process;GO:0006796//phosphate-containing compound metabolic process;GO:0006464//cellular protein modification process;GO:0006793//phosphorus metabolic process;GO:0036211//protein modification process;GO:0065007//biological regulation;GO:0009966//regu…
Unigene0000049	206.3333333	182.3333333	2.2634	2.5756	1.1984	1.8181	1.3013	1.284	2.012466667	1.4678	-0.455309485	0.360467442	1	no	-	--	-	-	-	-
Unigene0000050	1515.333333	1587.666667	10.1435	12.4257	13.8911	10.4426	10.0811	10.8776	12.15343333	10.4671	-0.215502145	0.588410018	1	no	Tank	PREDICTED: TRAF family member-associated NF-kappa-B activator-like isoform X1 [Sinocyclocheilus grahami]	ko04622//RIG-I-like receptor signaling pathway//Immune system//Organismal Systems	-	-	-
Unigene0000051	7.333333333	15	0.7228	0.1005	0.3211	0.3623	0.7781	0.8054	0.381466667	0.6486	0.765772027	0.363816899	1	no	-	--	-	-	-	-
Unigene0000052	35.33333333	54.33333333	3.1198	2.9726	0.8944	4.0366	2.9386	1.9675	2.328933333	2.9809	0.356078636	0.569739459	1	no	Znf235	PREDICTED: zinc finger protein 501-like [Sinocyclocheilus rhinocerous]	-	-	-	-
Unigene0000053	77.33333333	124	0.489	1.082	1.0137	1.4817	1.0364	0.8843	0.861566667	1.134133333	0.39655592	0.462355913	1	no	SYNE1	PREDICTED: nesprin-1-like [Sinocyclocheilus grahami]	-	-	-	-
Unigene0000054	3558	4824.666667	15.0051	12.6756	10.6672	15.3955	14.5529	13.0734	12.78263333	14.3406	0.165920312	0.66391881	1	no	-	Si:ch211-13c6.2 protein, partial [Danio rerio]	-	-	-	-
Unigene0000055	38	30	1.2376	1.0175	0.8837	1.115	0.3886	0.4934	1.046266667	0.665666667	-0.652378773	0.300778469	1	no	-	--	-	-	-	-
Unigene0000056	19.66666667	13.33333333	0.5552	1.1352	1.6114	0.5195	0.4707	0.8229	1.1006	0.604366667	-0.864794237	0.224313572	1	no	-	--	-	-	-	-
Unigene0000057	243.6666667	385.3333333	11.6905	8.4378	9.4429	11.7857	12.2646	14.4014	9.857066667	12.81723333	0.378854594	0.395268444	1	no	-	--	-	-	-	-
Unigene0000058	6.666666667	4.666666667	0.1463	0.7123	0.6067	0.5134	0.2067	0.1141	0.488433333	0.278066667	-0.812730849	0.404874873	1	no	-	--	-	-	-	-
Unigene0000059	3223.666667	2307.333333	45.9615	19.0619	61.444	19.0386	18.0901	35.6595	42.1558	24.26273333	-0.796989051	0.104353826	1	no	cfap97	PREDICTED: cilia- and flagella-associated protein 97-like [Sinocyclocheilus anshuiensis]	-	-	-	-
Unigene0000060	14	26.33333333	0.6601	0.4418	0.6414	1.2544	0.7383	0.6758	0.5811	0.8895	0.614208151	0.336058184	1	no	-	--	-	-	-	-
Unigene0000061	27	16.33333333	1.9379	0.1935	1.9571	0.4261	0.468	1.0853	1.362833333	0.6598	-1.046508457	0.208110202	1	no	-	--	-	-	-	-
Unigene0000062	13.33333333	30	1.4118	0.8247	0	1.7611	1.8617	0.6607	0.7455	1.427833333	0.93754733	0.301266847	1	no	-	--	-	-	-	-
Unigene0000063	1430	1997	10.7341	15.9448	8.1121	15.5245	13.6241	11.2441	11.597	13.46423333	0.215380437	0.612723718	1	no	pi4k2a	phosphatidylinositol 4-kinase type 2-alpha [Danio rerio]	ko01100//Metabolic pathways//Global and Overview//Metabolism;ko04070//Phosphatidylinositol signaling system//Signal transduction//Environmental Information Processing;ko00562//Inositol phosphate metabolism//Carbohydrate metabolism//Metabolism	GO:0098590//plasma membrane region;GO:0005623//cell;GO:0043005//neuron projection;GO:0031082//BLOC complex;GO:0018995//host;GO:0031982//vesicle;GO:0043227//membrane-bounded organelle;GO:0044216//other organism cell;GO:0044424//intracellular part;GO:0044218//other organism cell membrane;GO:0044279//other organism membrane;GO:0044456//synapse part;GO:0044444//cytoplasmic part;GO:0097458//neuron par…	GO:0032403//protein complex binding;GO:0001883//purine nucleoside binding;GO:0003824//catalytic activity;GO:0032550//purine ribonucleoside binding;GO:0044877//macromolecular complex binding;GO:0016773//phosphotransferase activity, alcohol group as acceptor;GO:0036094//small molecule binding;GO:0016301//kinase activity;GO:0032549//ribonucleoside binding;GO:0005488//binding;GO:0097159//organic cycl…	GO:0006796//phosphate-containing compound metabolic process;GO:0044237//cellular metabolic process;GO:0009987//cellular process;GO:0008152//metabolic process;GO:0006793//phosphorus metabolic process
Unigene0000064	2.333333333	8	0.0736	0.2865	0.1525	1.2045	0.1386	0.0574	0.170866667	0.466833333	1.4500366	0.284779023	1	no	-	--	-	-	-	-
Unigene0000065	1457.333333	2249	22.1586	31.4859	18.0564	23.2906	39.1247	30.8726	23.9003	31.09596667	0.379698739	0.37071846	1	no	NSUN5	PREDICTED: probable 28S rRNA (cytosine-C(5))-methyltransferase isoform X3 [Sinocyclocheilus grahami]	-	-	GO:0003824//catalytic activity	GO:0008152//metabolic process
Unigene0000066	14	22	0.8613	0.5765	0.8369	1.0912	0.7606	1.0497	0.758233333	0.967166667	0.351122642	0.591066813	1	no	-	--	-	-	-	-
Unigene0000067	15541	18861.66667	147.0284	156.6238	147.2798	110.0456	175.1099	170.9013	150.3106667	152.0189333	0.016303624	0.965937884	1	no	PRKAR1A	cAMP-dependent protein kinase type I-alpha regulatory subunit [Danio rerio]	ko04910//Insulin signaling pathway//Endocrine system//Organismal Systems;ko04210//Apoptosis//Cell growth and death//Cellular Processes	GO:0044424//intracellular part;GO:0005623//cell;GO:0005622//intracellular;GO:0044464//cell part	GO:0019207//kinase regulator activity;GO:0030234//enzyme regulator activity;GO:0019887//protein kinase regulator activity;GO:0098772//molecular function regulator	GO:0001932//regulation of protein phosphorylation;GO:0031323//regulation of cellular metabolic process;GO:0032268//regulation of cellular protein metabolic process;GO:0019220//regulation of phosphate metabolic process;GO:0031399//regulation of protein modification process;GO:0042325//regulation of phosphorylation;GO:0065007//biological regulation;GO:0051246//regulation of protein metabolic proces…
Unigene0000068	16.33333333	31	0.8786	1.0998	1.1059	1.7615	2.6602	0.5875	1.0281	1.669733333	0.699637116	0.320512634	1	no	-	--	-	-	-	-
Unigene0000069	3.333333333	0.666666667	0.4149	0.1346	0.1433	0	0	0.1079	0.230933333	0.035966667	-2.682744065	0.113855715	1	no	-	PREDICTED: nicalin-1-like [Cyprinus carpio]	-	-	-	-
Unigene0000070	1.333333333	5.333333333	0	0.1185	0.1262	0.5696	0.1147	0.095	0.081566667	0.259766667	1.671164715	0.197924863	1	no	-	PREDICTED: uroplakin-3a-like [Cyprinus carpio]	-	-	-	-
Unigene0000071	56	80.66666667	1.2242	1.6502	1.0736	1.9823	1.3527	1.3405	1.316	1.5585	0.243998666	0.650560688	1	no	-	--	-	-	-	-
Unigene0000072	42.33333333	60.66666667	1.1696	2.2405	1.3686	2.0296	2.3454	1.3831	1.5929	1.919366667	0.268974644	0.645560377	1	no	-	--	-	-	-	-
Unigene0000073	7.333333333	10.33333333	0.4717	0.1312	0.9081	0.7356	0.4443	0.5257	0.503666667	0.568533333	0.174775683	0.892415779	1	no	-	--	-	-	-	-
Unigene0000074	10	16	1.5519	1.3094	0.2145	1.5325	1.4617	1.1298	1.025266667	1.374666667	0.423082636	0.615050563	1	no	-	PREDICTED: SLAM family member 9-like [Sinocyclocheilus rhinocerous]	-	-	-	-
Unigene0000075	8	22.66666667	0.2145	0.8351	0.2223	1.2958	0.5555	1.0873	0.423966667	0.979533333	1.208143747	0.121775237	1	no	MOB3B	PREDICTED: MOB kinase activator 3B-like [Cyprinus carpio]	-	-	-	-
Unigene0000076	10.66666667	6.666666667	0.7461	0.1453	1.5465	0.0582	0.2811	0.8729	0.812633333	0.404066667	-1.008011202	0.350678481	1	no	-	--	-	-	-	-
Unigene0000077	86	138.6666667	6.6529	5.8601	3.809	5.2856	10.9814	6.1778	5.440666667	7.4816	0.459563393	0.387837392	1	no	-	--	-	-	-	-
Unigene0000078	980.3333333	1025.333333	13.5319	15.6424	11.3261	11.968	13.3301	10.0499	13.50013333	11.78266667	-0.196307568	0.634797612	1	no	TRAM2	PREDICTED: translocating chain-associated membrane protein 2-like isoform X1 [Cyprinus carpio]	-	GO:0016020//membrane;GO:0044425//membrane part;GO:0031224//intrinsic component of membrane	-	-
Unigene0000079	11.33333333	24.33333333	1.2177	0.2964	1.1044	1.424	1.4337	1.7216	0.872833333	1.526433333	0.806386477	0.257744931	1	no	-	--	-	-	-	-
Unigene0000080	1.666666667	3	0	0.3077	0	0.2957	0.0595	0.0986	0.102566667	0.151266667	0.560532165	0.752493217	1	no	-	PREDICTED: uncharacterized protein LOC107583085 [Sinocyclocheilus grahami]	-	-	-	-
Unigene0000081	446	417	38.8399	26.5449	29.9534	22.6968	19.5963	30.3512	31.7794	24.21476667	-0.392204785	0.377327516	1	no	-	--	-	-	-	-
Unigene0000082	12.66666667	21.33333333	0.8364	0.6785	1.1558	1.5215	1.4443	0.7611	0.890233333	1.2423	0.480758182	0.474420495	1	no	-	--	-	-	-	-
Unigene0000083	9.666666667	32	0.1463	1.2109	0.7583	2.9661	1.9985	0.856	0.705166667	1.9402	1.460169191	0.067885158	1	no	-	--	-	-	-	-
Unigene0000084	122.3333333	171.3333333	1.8956	3.1562	1.4139	1.4779	3.1038	3.0539	2.155233333	2.5452	0.239934958	0.658837997	1	no	-	--	-	-	-	-
Unigene0000085	5	6.666666667	0.308	0.6746	0.1596	0.3601	0.3626	0.5405	0.380733333	0.421066667	0.145267787	0.920279463	1	no	-	--	-	-	-	-
Unigene0000086	8	20.66666667	0.9848	0.1514	0.1074	0.9698	1.074	0.6468	0.414533333	0.896866667	1.113405406	0.187300786	1	no	-	--	-	-	-	-
Unigene0000087	1.333333333	5.666666667	0	0.2014	0.0715	0.2689	0.5847	0.1614	0.090966667	0.338333333	1.895035428	0.115445335	1	no	-	--	-	-	-	-
Unigene0000088	9.666666667	8	0.6748	0.2737	0.6994	0.3069	0.5297	0.307	0.5493	0.3812	-0.527046173	0.516028986	1	no	-	--	-	-	-	-
Unigene0000089	21	19.33333333	1.1782	0.4129	1.4165	0.845	0.5327	0.8455	1.002533333	0.741066667	-0.435974967	0.540938386	1	no	-	--	-	-	-	-
Unigene0000090	9	16.66666667	0.8408	0.3581	0.2179	1.5159	0.198	0.3689	0.472266667	0.694266667	0.555888195	0.556890871	1	no	-	--	-	-	-	-
Unigene0000091	15.66666667	11.66666667	0.6688	1.8231	0.6239	1.095	0.882	0	1.0386	0.659	-0.65628976	0.492958361	1	no	-	--	-	-	-	-
Unigene0000092	246.6666667	207.3333333	13.0161	12.2862	16.8344	8.9124	10.9276	9.4907	14.04556667	9.7769	-0.522665829	0.255006517	1	no	-	--	-	-	-	-
Unigene0000093	44	31	1.7606	6.856	1.3488	3.1629	2.163	0.5971	3.3218	1.974333333	-0.750599628	0.333349364	1	no	-	--	-	-	-	-
Unigene0000094	58	54.66666667	4.3898	5.3421	2.9574	3.1943	4.0659	2.7963	4.229766667	3.352166667	-0.3354842	0.535956198	1	no	-	--	-	-	-	-
Unigene0000095	41	74	0.6549	1.4064	0.2795	1.4567	1.2882	0.8113	0.780266667	1.1854	0.603334789	0.349910989	1	no	tc1a	transposase [Rana pipiens]	-	-	-	-
Unigene0000096	18.66666667	21.66666667	0	3.1378	0.7262	1.748	1.4519	0.6012	1.288	1.267033333	-0.023678114	1	1	no	-	--	-	-	-	-
Unigene0000097	611.6666667	1355	11.3376	6.5554	3.1615	22.56	7.2857	7.8918	7.018166667	12.57916667	0.841870237	0.139101942	1	no	Rdh7	PREDICTED: retinol dehydrogenase 7-like [Cyprinus carpio]	-	-	GO:0016616//oxidoreductase activity, acting on the CH-OH group of donors, NAD or NADP as acceptor;GO:0016491//oxidoreductase activity;GO:0016614//oxidoreductase activity, acting on CH-OH group of donors;GO:0003824//catalytic activity	GO:0030154//cell differentiation;GO:0007275//multicellular organism development;GO:0071704//organic substance metabolic process;GO:0048762//mesenchymal cell differentiation;GO:0048729//tissue morphogenesis;GO:0002009//morphogenesis of an epithelium;GO:0003008//system process;GO:0014031//mesenchymal cell development;GO:0007507//heart development;GO:0006720//isoprenoid metabolic process;GO:0048513/…
Unigene0000098	42	92	0.9595	0.8562	0.7044	1.6986	1.5627	1.3097	0.840033333	1.523666667	0.859028837	0.098809165	1	no	GDPD1	PREDICTED: glycerophosphodiester phosphodiesterase domain-containing protein 1-like isoform X2 [Sinocyclocheilus rhinocerous]	-	-	GO:0016787//hydrolase activity;GO:0003824//catalytic activity;GO:0016788//hydrolase activity, acting on ester bonds;GO:0042578//phosphoric ester hydrolase activity;GO:0008081//phosphoric diester hydrolase activity	GO:0044238//primary metabolic process;GO:0044763//single-organism cellular process;GO:0044710//single-organism metabolic process;GO:0044699//single-organism process;GO:0006066//alcohol metabolic process;GO:0044237//cellular metabolic process;GO:0019751//polyol metabolic process;GO:0009987//cellular process;GO:1901615//organic hydroxy compound metabolic process;GO:0044723//single-organism carbohyd…
Unigene0000099	1739	2026.666667	16.172	13.7952	18.2088	13.1953	13.7104	18.9969	16.05866667	15.30086667	-0.069738741	0.86273545	1	no	GPSM2	PREDICTED: G-protein-signaling modulator 2-like isoform X1 [Sinocyclocheilus anshuiensis]	-	-	GO:0030234//enzyme regulator activity;GO:0098772//molecular function regulator;GO:0060589//nucleoside-triphosphatase regulator activity	GO:0040001//establishment of mitotic spindle localization;GO:0044699//single-organism process;GO:0051716//cellular response to stimulus;GO:1902580//single-organism cellular localization;GO:0007049//cell cycle;GO:0007154//cell communication;GO:0050794//regulation of cellular process;GO:0000278//mitotic cell cycle;GO:0071840//cellular component organization or biogenesis;GO:0051293//establishment o…
Unigene0000100	9.333333333	15.66666667	0.4968	0.5209	0.0396	0.3873	0.54	0.5664	0.352433333	0.4979	0.498505634	0.54766476	1	no	-	--	-	-	-	-
Unigene0000101	16.66666667	22.66666667	1.5466	0.7528	0.9351	1.256	1.1533	1.2063	1.078166667	1.2052	0.160692366	0.839760917	1	no	-	--	-	-	-	-
Unigene0000102	60	83	0.6278	0.9481	0.7304	1.0689	0.7	0.8395	0.768766667	0.869466667	0.177584936	0.740388117	1	no	Cers1	PREDICTED: ceramide synthase 1-like [Sinocyclocheilus anshuiensis]	ko01100//Metabolic pathways//Global and Overview//Metabolism;ko00600//Sphingolipid metabolism//Lipid metabolism//Metabolism	-	-	-
Unigene0000103	1379.666667	2019	10.2417	16.1926	16.0822	12.3924	21.2135	18.4219	14.17216667	17.3426	0.291259866	0.492952902	1	no	Pnpla2	PREDICTED: patatin-like phospholipase domain-containing protein 2 [Sinocyclocheilus anshuiensis]	ko01100//Metabolic pathways//Global and Overview//Metabolism;ko00561//Glycerolipid metabolism//Lipid metabolism//Metabolism	-	-	-
Unigene0000104	2	10.33333333	0	0.4484	0	1.4364	0	0.4192	0.149466667	0.618533333	2.049027568	0.16909347	1	no	-	--	-	-	-	-
Unigene0000105	3.666666667	6.333333333	0.4226	0.0686	0.292	0.1647	0.3317	0.6044	0.261066667	0.366933333	0.491099705	0.671490875	1	no	-	--	-	-	-	-
Unigene0000106	78	70	12.5178	8.4665	9.9698	8.5265	7.8192	6.5779	10.31803333	7.6412	-0.433296885	0.400644873	1	no	-	--	-	-	-	-
Unigene0000107	25.33333333	32.33333333	2.849	2.1573	3.0623	1.8098	2.3854	4.1976	2.689533333	2.7976	0.056833832	0.954911073	1	no	-	--	-	-	-	-
Unigene0000108	416.3333333	454	31.6793	14.5593	25.558	14.3739	16.9897	32.1902	23.9322	21.1846	-0.175937136	0.724504836	1	no	-	--	-	-	-	-
Unigene0000109	950.6666667	860	77.7193	38.8019	68.1615	35.1327	36.3304	64.1323	61.5609	45.19846667	-0.445740493	0.335075696	1	no	-	--	-	-	-	-
Unigene0000110	38	59.66666667	0.7849	1.0972	0.3963	1.114	0.8151	1.0204	0.759466667	0.983166667	0.372449358	0.522166337	1	no	-	--	-	-	-	-
Unigene0000111	39	32.33333333	0.635	1.6228	0.8227	0.8664	0.4486	0.7636	1.026833333	0.692866667	-0.567552379	0.357533342	1	no	-	--	-	-	-	-
Unigene0000112	13.66666667	9	0.9159	1.3375	0.8702	0.8926	0.2876	0.4763	1.0412	0.552166667	-0.915071514	0.22979666	1	no	-	--	-	-	-	-
Unigene0000113	13.33333333	8	1.2005	0.2922	1.5553	0.0585	0.2827	1.1119	1.016	0.484366667	-1.068728912	0.286047481	1	no	-	--	-	-	-	-
Unigene0000114	27	41	0.9352	0.7478	1.0385	0.677	1.8246	1.016	0.907166667	1.172533333	0.370189402	0.551115308	1	no	GABRG1	PREDICTED: gamma-aminobutyric acid receptor subunit gamma-1-like [Sinocyclocheilus grahami]	ko04080//Neuroactive ligand-receptor interaction//Signaling molecules and interaction//Environmental Information Processing	GO:0044425//membrane part;GO:0016020//membrane;GO:0031224//intrinsic component of membrane	GO:0005215//transporter activity;GO:0022838//substrate-specific channel activity;GO:0099600//transmembrane receptor activity;GO:0022891//substrate-specific transmembrane transporter activity;GO:0022857//transmembrane transporter activity;GO:0015276//ligand-gated ion channel activity;GO:0022892//substrate-specific transporter activity;GO:0022836//gated channel activity;GO:0005216//ion channel acti…	GO:0051234//establishment of localization;GO:0006811//ion transport;GO:0023052//signaling;GO:0006810//transport;GO:0009987//cellular process;GO:0007186//G-protein coupled receptor signaling pathway;GO:1902578//single-organism localization;GO:0051716//cellular response to stimulus;GO:0051179//localization;GO:0050794//regulation of cellular process;GO:0044763//single-organism cellular process;GO:00…
Unigene0000115	13	5.333333333	1.6407	0.6085	0.8098	0.4264	0.2208	0.3656	1.019666667	0.3376	-1.594710797	0.046500626	1	no	-	--	-	-	-	-
Unigene0000116	12.66666667	21	0.6915	1.7504	0.1433	1.4017	1.8889	0.4315	0.861733333	1.2407	0.525840919	0.555302375	1	no	ywhag1	PREDICTED: 14-3-3 protein gamma-like, partial [Anolis carolinensis]	ko04110//Cell cycle//Cell growth and death//Cellular Processes;ko04114//Oocyte meiosis//Cell growth and death//Cellular Processes	-	-	-
Unigene0000117	20	28.66666667	1.2376	0.8675	0.8723	1.6596	1.1191	0.7337	0.992466667	1.1708	0.238404098	0.717023884	1	no	-	--	-	-	-	-
Unigene0000118	337	347.6666667	2.4641	2.7045	2.7898	2.074	2.3653	2.3505	2.6528	2.263266667	-0.229109334	0.597760029	1	no	Prickle1	PREDICTED: prickle-like protein 1 [Sinocyclocheilus anshuiensis]	ko04310//Wnt signaling pathway//Signal transduction//Environmental Information Processing	-	GO:0043169//cation binding;GO:0043167//ion binding;GO:0046872//metal ion binding;GO:0005488//binding;GO:0046914//transition metal ion binding	GO:0007420//brain development;GO:0044699//single-organism process;GO:0032501//multicellular organismal process;GO:0007417//central nervous system development;GO:0060322//head development;GO:0051179//localization;GO:0048870//cell motility;GO:0048856//anatomical structure development;GO:0044763//single-organism cellular process;GO:0007399//nervous system development;GO:0051674//localization of cell…
Unigene0000119	23	23.66666667	1.0187	1.6056	0.7039	0.7185	0.8681	1.2486	1.1094	0.945066667	-0.231291622	0.737035383	1	no	-	--	-	-	-	-
Unigene0000120	51	94.66666667	0.9225	1.1594	0.4694	1.4515	1.2955	1.1906	0.850433333	1.312533333	0.626084012	0.257716511	1	no	Kazn	PREDICTED: kazrin-like [Sinocyclocheilus grahami]	-	-	-	-
Unigene0000121	10	12.33333333	1.341	0.2176	0.1158	0.9584	0.3158	0.3923	0.558133333	0.5555	-0.006822899	1	1	no	-	--	-	-	-	-
Unigene0000122	302.3333333	447.6666667	1.9838	1.6682	1.5734	1.6901	1.9769	2.6956	1.7418	2.120866667	0.284074947	0.524639216	1	no	ARHGEF10L	PREDICTED: rho guanine nucleotide exchange factor 10-like protein [Cyprinus carpio]	-	-	-	-
Unigene0000123	9	7	0.4758	1.0808	0.5753	0.7419	0	0.5567	0.710633333	0.432866667	-0.715182653	0.504029956	1	no	-	--	-	-	-	-
Unigene0000124	12	18	1.1005	0.6428	0.9125	1.5444	1.2439	0.515	0.885266667	1.1011	0.314761493	0.702817829	1	no	-	PREDICTED: transcription elongation factor A protein 3-like isoform X5 [Sinocyclocheilus rhinocerous]	-	GO:0005623//cell;GO:0043227//membrane-bounded organelle;GO:0044464//cell part;GO:0043231//intracellular membrane-bounded organelle;GO:0044424//intracellular part;GO:0043229//intracellular organelle;GO:0005622//intracellular;GO:0043226//organelle	GO:0043167//ion binding;GO:0003676//nucleic acid binding;GO:0043169//cation binding;GO:0003723//RNA binding;GO:0005488//binding;GO:0008135//translation factor activity, RNA binding;GO:0097159//organic cyclic compound binding;GO:1901363//heterocyclic compound binding;GO:0046872//metal ion binding;GO:0046914//transition metal ion binding	GO:0044238//primary metabolic process;GO:0044237//cellular metabolic process;GO:0090304//nucleic acid metabolic process;GO:0006412//translation;GO:0009987//cellular process;GO:0006725//cellular aromatic compound metabolic process;GO:0006366//transcription from RNA polymerase II promoter;GO:0008152//metabolic process;GO:0044267//cellular protein metabolic process;GO:0044260//cellular macromolecule…
Unigene0000125	2957	4040	54.6568	69.6521	47.4668	53.1633	81.0499	62.9895	57.25856667	65.73423333	0.199153342	0.614890815	1	no	TSNAX	translin-associated protein X [Danio rerio]	-	-	GO:0003676//nucleic acid binding;GO:0003677//DNA binding;GO:0097159//organic cyclic compound binding;GO:1901363//heterocyclic compound binding;GO:0005488//binding	-
Unigene0000126	1	2	0	0.191	0	0.102	0.1232	0.102	0.063666667	0.109066667	0.77660011	0.796076617	1	no	-	--	-	-	-	-
Unigene0000127	7	2	0.5742	0.6988	0.2232	0.056	0.1352	0.168	0.498733333	0.119733333	-2.058443781	0.036730403	1	no	-	--	-	-	-	-
Unigene0000128	1139	1826.666667	14.7961	14.6448	12.7415	15.5633	22.7054	18.3313	14.0608	18.86666667	0.424160872	0.294498201	1	no	Pdhx	PREDICTED: pyruvate dehydrogenase protein X component, mitochondrial isoform X1 [Sinocyclocheilus grahami]	ko01100//Metabolic pathways//Global and Overview//Metabolism;ko00010//Glycolysis / Gluconeogenesis//Carbohydrate metabolism//Metabolism;ko00620//Pyruvate metabolism//Carbohydrate metabolism//Metabolism;ko00020//Citrate cycle (TCA cycle)//Carbohydrate metabolism//Metabolism	-	GO:0016740//transferase activity;GO:0003824//catalytic activity	-
Unigene0000129	195.6666667	279.6666667	1.3286	1.5171	1.377	1.3773	2.4825	1.266	1.407566667	1.7086	0.279611433	0.561617468	1	no	EML1	PREDICTED: echinoderm microtubule-associated protein-like 1 isoform X5 [Sinocyclocheilus rhinocerous]	-	-	-	-
Unigene0000130	18.66666667	34.33333333	0.2183	0.4959	1.3575	1.4182	0.8567	0.7946	0.690566667	1.023166667	0.567188566	0.421785704	1	no	-	--	-	-	-	-
Unigene0000131	6.666666667	8.333333333	0.3098	0.6785	0.5619	1.0868	0.2188	0.2416	0.516733333	0.515733333	-0.002794658	1	1	no	-	--	-	-	-	-
Unigene0000132	12.66666667	19	0.6038	0.5486	0.3755	0.7531	0.6066	0.5337	0.5093	0.631133333	0.309429104	0.659450124	1	no	-	--	-	-	-	-
Unigene0000133	354.6666667	352	5.215	4.8774	5.557	3.6318	4.0152	5.1076	5.216466667	4.251533333	-0.29508969	0.501896336	1	no	sdhdb	PREDICTED: succinate dehydrogenase [ubiquinone] cytochrome b small subunit B, mitochondrial-like [Sinocyclocheilus anshuiensis]	ko01100//Metabolic pathways//Global and Overview//Metabolism;ko01110//Biosynthesis of secondary metabolites//Global and Overview//Metabolism;ko01130//Biosynthesis of antibiotics//Global and Overview//Metabolism;ko01120//Microbial metabolism in diverse environments//Global and Overview//Metabolism;ko00190//Oxidative phosphorylation//Energy metabolism//Metabolism;ko01200//Carbon metabolism//Global …	GO:0005622//intracellular;GO:0044429//mitochondrial part;GO:0044455//mitochondrial membrane part;GO:0031975//envelope;GO:0044424//intracellular part;GO:0031966//mitochondrial membrane;GO:0031090//organelle membrane;GO:0043229//intracellular organelle;GO:0044446//intracellular organelle part;GO:0016020//membrane;GO:0005746//mitochondrial respiratory chain;GO:0044422//organelle part;GO:0043226//org…	GO:0048038//quinone binding;GO:0046906//tetrapyrrole binding;GO:0048037//cofactor binding;GO:1901363//heterocyclic compound binding;GO:0005488//binding;GO:0097159//organic cyclic compound binding	GO:0044710//single-organism metabolic process;GO:0044699//single-organism process;GO:0008152//metabolic process;GO:0055114//oxidation-reduction process
Unigene0000134	56.66666667	47.66666667	3.0947	3.7836	5.4455	2.4689	1.6948	4.1542	4.107933333	2.772633333	-0.567155929	0.338144506	1	no	-	--	-	-	-	-
Unigene0000135	252.6666667	479.6666667	3.8656	6.4584	2.3794	12.8971	3.9114	2.8045	4.234466667	6.537666667	0.626595548	0.303929138	1	no	Chi3l1	PREDICTED: acidic mammalian chitinase isoform X1 [Sinocyclocheilus rhinocerous]	-	-	-	-
Unigene0000136	4.666666667	11.33333333	0.2344	0.4564	0.4049	0.9746	0.8095	0.4266	0.365233333	0.7369	1.012650414	0.208217188	1	no	-	--	-	-	-	-
Unigene0000137	45.66666667	40.66666667	1.3688	0.9607	2.0786	1.1416	0.8695	1.167	1.469366667	1.059366667	-0.471992432	0.404186103	1	no	-	--	-	-	-	-
Unigene0000138	14	17.33333333	0.6232	2.2751	0.323	1.7005	1.1006	0.5468	1.073766667	1.115966667	0.055613411	0.968797801	1	no	-	--	-	-	-	-
Unigene0000139	0	3	0	0	0	0.0853	0.1031	0.2134	0.001	0.133933333	7.065371253	0.030869089	1	no	-	--	-	-	-	-
Unigene0000140	509.3333333	564.6666667	7.9107	7.7983	9.7635	5.9476	7.3419	9.8831	8.490833333	7.7242	-0.136520634	0.754699098	1	no	b9d2	PREDICTED: B9 domain-containing protein 2-like [Sinocyclocheilus grahami]	-	GO:0044430//cytoskeletal part;GO:0043232//intracellular non-membrane-bounded organelle;GO:0044463//cell projection part;GO:0044446//intracellular organelle part;GO:0035869//ciliary transition zone;GO:0043228//non-membrane-bounded organelle;GO:0015630//microtubule cytoskeleton;GO:0005856//cytoskeleton;GO:0044464//cell part;GO:0044424//intracellular part;GO:0043229//intracellular organelle;GO:00315…	GO:0008092//cytoskeletal protein binding;GO:0015631//tubulin binding;GO:0005488//binding;GO:0005515//protein binding	GO:0044763//single-organism cellular process;GO:0044767//single-organism developmental process;GO:0071702//organic substance transport;GO:0071840//cellular component organization or biogenesis;GO:0015031//protein transport;GO:0006810//transport;GO:0016043//cellular component organization;GO:0010927//cellular component assembly involved in morphogenesis;GO:0009987//cellular process;GO:0008104//pro…
Unigene0000141	653	433	6.8371	2.734	10.1515	3.5278	2.5984	4.3732	6.5742	3.4998	-0.909542867	0.079194037	1	no	Sertad4	PREDICTED: SERTA domain-containing protein 4-like [Mesocricetus auratus]	-	-	-	-
Unigene0000142	2.333333333	6.666666667	0.1508	0.1957	0	0.1959	0.5207	0.1568	0.1155	0.291133333	1.333787179	0.277370474	1	no	-	PREDICTED: cysteine-rich motor neuron 1 protein-like [Cyprinus carpio]	-	-	GO:0030234//enzyme regulator activity;GO:0004857//enzyme inhibitor activity;GO:0098772//molecular function regulator	GO:0043086//negative regulation of catalytic activity;GO:0048519//negative regulation of biological process;GO:0044092//negative regulation of molecular function;GO:0065009//regulation of molecular function;GO:0065007//biological regulation;GO:0050789//regulation of biological process;GO:0009892//negative regulation of metabolic process;GO:0019222//regulation of metabolic process;GO:0050790//regu…
Unigene0000143	502	680.3333333	4.7145	5.9554	3.9778	5.2172	6.0188	5.3033	4.882566667	5.5131	0.175224027	0.68024715	1	no	Pomt1	PREDICTED: protein O-mannosyl-transferase 1-like [Cyprinus carpio]	ko01100//Metabolic pathways//Global and Overview//Metabolism;ko00514//Other types of O-glycan biosynthesis//Glycan biosynthesis and metabolism//Metabolism	-	GO:0000030//mannosyltransferase activity;GO:0016757//transferase activity, transferring glycosyl groups;GO:0016740//transferase activity;GO:0016758//transferase activity, transferring hexosyl groups;GO:0003824//catalytic activity	GO:0043170//macromolecule metabolic process;GO:0044763//single-organism cellular process;GO:0043413//macromolecule glycosylation;GO:0044699//single-organism process;GO:0044723//single-organism carbohydrate metabolic process;GO:0044267//cellular protein metabolic process;GO:0008152//metabolic process;GO:0005975//carbohydrate metabolic process;GO:0034645//cellular macromolecule biosynthetic process…
Unigene0000144	27.66666667	70.33333333	0.428	0.4514	0.61	1.2792	0.8568	0.946	0.496466667	1.027333333	1.049135599	0.057959161	1	no	Nrcam	PREDICTED: neuronal cell adhesion molecule-like isoform X2 [Sinocyclocheilus anshuiensis]	ko04514//Cell adhesion molecules (CAMs)//Signaling molecules and interaction//Environmental Information Processing	-	-	-
Unigene0000145	68.66666667	59	3.2734	3.4283	3.5471	2.4747	2.5694	2.2438	3.416266667	2.4293	-0.49187993	0.34286356	1	no	-	--	-	-	-	-
Unigene0000146	2543.666667	3565	8.8108	7.9476	10.0825	8.9071	11.3347	10.893	8.946966667	10.37826667	0.214094965	0.578505421	1	no	KDM6B	PREDICTED: LOW QUALITY PROTEIN: lysine-specific demethylase 6B-like [Cyprinus carpio]	-	-	-	-
Unigene0000147	11.66666667	16	0.9837	0.663	1.0196	0.413	1.2117	1.4166	0.888766667	1.013766667	0.189849019	0.84211928	1	no	-	--	-	-	-	-
Unigene0000148	112.3333333	127.3333333	3.8074	2.6786	2.9093	3.12	4.1884	1.6909	3.131766667	2.999766667	-0.062126441	0.915072682	1	no	-	--	-	-	-	-
Unigene0000149	906	912	8.8861	7.0123	12.0654	5.6871	6.6211	10.5999	9.321266667	7.636033333	-0.287702615	0.521179444	1	no	KLF9	PREDICTED: Krueppel-like factor 9 [Sinocyclocheilus rhinocerous]	-	-	GO:0005488//binding;GO:0043167//ion binding;GO:0043169//cation binding	-
Unigene0000150	2733.666667	3276.666667	22.3606	21.0101	20.7278	20.2839	19.652	23.2129	21.36616667	21.0496	-0.021535277	0.955094416	1	no	RPS6KB1	PREDICTED: ribosomal protein S6 kinase beta-1-like [Sinocyclocheilus anshuiensis]	ko04910//Insulin signaling pathway//Endocrine system//Organismal Systems;ko04012//ErbB signaling pathway//Signal transduction//Environmental Information Processing;ko04350//TGF-beta signaling pathway//Signal transduction//Environmental Information Processing;ko04150//mTOR signaling pathway//Signal transduction//Environmental Information Processing	-	GO:0001883//purine nucleoside binding;GO:0016772//transferase activity, transferring phosphorus-containing groups;GO:0097159//organic cyclic compound binding;GO:0036094//small molecule binding;GO:0032549//ribonucleoside binding;GO:0016773//phosphotransferase activity, alcohol group as acceptor;GO:0016740//transferase activity;GO:0003824//catalytic activity;GO:0016301//kinase activity;GO:0032550//…	GO:0006793//phosphorus metabolic process;GO:0044267//cellular protein metabolic process;GO:0008152//metabolic process;GO:0007154//cell communication;GO:0044763//single-organism cellular process;GO:0044238//primary metabolic process;GO:0044260//cellular macromolecule metabolic process;GO:0071704//organic substance metabolic process;GO:0019538//protein metabolic process;GO:0043170//macromolecule me…
Unigene0000151	8813.333333	8916	194.2017	527.1741	128.0267	309.3489	256.9987	155.6882	283.1341667	240.6786	-0.234377984	0.648219795	1	no	CNFN	plac8 onzin related protein 1 [Danio rerio]	-	-	-	GO:0032502//developmental process;GO:0007275//multicellular organism development;GO:0044767//single-organism developmental process;GO:0048856//anatomical structure development;GO:0048731//system development;GO:0044707//single-multicellular organism process;GO:0044699//single-organism process;GO:0032501//multicellular organismal process;GO:0009653//anatomical structure morphogenesis
Unigene0000152	462	322	16.7822	10.6007	22.9442	9.2176	7.0745	11.9972	16.7757	9.429766667	-0.831078989	0.080857881	1	no	-	--	-	-	-	-
Unigene0000153	75.66666667	70.66666667	5.5641	7.8003	3.3833	3.8174	5.8699	3.5878	5.582566667	4.425033333	-0.335240252	0.550276935	1	no	-	--	-	-	-	-
Unigene0000154	11577	13620	77.1955	81.6542	76.5827	61.3023	92.7144	77.5006	78.47746667	77.17243333	-0.024192874	0.9486755	1	no	Kpnb1	PREDICTED: importin subunit beta-1 isoform X1 [Sinocyclocheilus rhinocerous]	ko03013//RNA transport//Translation//Genetic Information Processing	-	-	-
Unigene0000155	107.6666667	181.6666667	1.0726	1.6852	0.6494	1.7552	1.9905	1.11	1.135733333	1.618566667	0.511092655	0.341137831	1	no	slc17a8	PREDICTED: vesicular glutamate transporter 3 [Cyprinus carpio]	-	GO:0044456//synapse part;GO:0042995//cell projection;GO:0005623//cell;GO:0005622//intracellular;GO:0031410//cytoplasmic vesicle;GO:0005737//cytoplasm;GO:0043226//organelle;GO:0045202//synapse;GO:0031982//vesicle;GO:0016023//cytoplasmic, membrane-bounded vesicle;GO:0043229//intracellular organelle;GO:0099503//secretory vesicle;GO:0044444//cytoplasmic part;GO:0043231//intracellular membrane-bounded…	GO:0022804//active transmembrane transporter activity;GO:0015291//secondary active transmembrane transporter activity;GO:0005215//transporter activity;GO:0022857//transmembrane transporter activity	GO:0044765//single-organism transport;GO:0023052//signaling;GO:0044699//single-organism process;GO:0044763//single-organism cellular process;GO:0050877//neurological system process;GO:0006810//transport;GO:0003008//system process;GO:0007154//cell communication;GO:0007600//sensory perception;GO:0032501//multicellular organismal process;GO:0009987//cellular process;GO:0050896//response to stimulus;…
Unigene0000156	14	20.66666667	0.8561	0.8334	0.5546	1.0429	0.5544	1.0851	0.748033333	0.894133333	0.257387423	0.719333897	1	no	MAP1B	PREDICTED: electromotor neuron-associated protein 1-like, partial [Sinocyclocheilus grahami]	-	-	-	-
Unigene0000157	1227	1845	15.778	30.599	10.9674	26.4503	29.4275	16.9482	19.1148	24.27533333	0.344801001	0.46794918	1	no	Prss16	Zgc:158605 [Danio rerio]	-	-	GO:0003824//catalytic activity;GO:0016787//hydrolase activity;GO:0008233//peptidase activity;GO:0070011//peptidase activity, acting on L-amino acid peptides	GO:0071704//organic substance metabolic process;GO:0008152//metabolic process;GO:0051604//protein maturation;GO:0044238//primary metabolic process;GO:0019538//protein metabolic process;GO:0016485//protein processing;GO:0006508//proteolysis;GO:0043170//macromolecule metabolic process;GO:0010467//gene expression
Unigene0000158	895.3333333	1356.666667	5.6681	6.1775	6.4013	5.9396	10.3143	7.0148	6.0823	7.756233333	0.350739228	0.405004156	1	no	TECPR1	PREDICTED: tectonin beta-propeller repeat-containing protein 1-like isoform X3 [Sinocyclocheilus anshuiensis]	-	-	-	-
Unigene0000159	34.66666667	26.33333333	1.7847	1.0077	0.9249	0.3896	1.0086	0.9745	1.2391	0.7909	-0.647725424	0.312188452	1	no	-	--	-	-	-	-
Unigene0000160	42.66666667	78.33333333	0.4706	0.8909	0.2981	0.9784	0.7881	0.7648	0.5532	0.843766667	0.609042938	0.293676189	1	no	HS3ST5	PREDICTED: heparan sulfate glucosamine 3-O-sulfotransferase 5 [Cyprinus carpio]	ko00534//Glycosaminoglycan biosynthesis - heparan sulfate / heparin//Glycan biosynthesis and metabolism//Metabolism	-	-	-
Unigene0000161	2058	1961.666667	11.4846	10.8438	14.7495	8.4651	8.6136	11.7983	12.3593	9.625666667	-0.360638666	0.368689303	1	no	Rps6kb1	PREDICTED: ribosomal protein S6 kinase beta-1-like [Danio rerio]	ko04910//Insulin signaling pathway//Endocrine system//Organismal Systems;ko04012//ErbB signaling pathway//Signal transduction//Environmental Information Processing;ko04350//TGF-beta signaling pathway//Signal transduction//Environmental Information Processing;ko04150//mTOR signaling pathway//Signal transduction//Environmental Information Processing	-	GO:0032549//ribonucleoside binding;GO:0003824//catalytic activity;GO:0097159//organic cyclic compound binding;GO:1901363//heterocyclic compound binding;GO:0097367//carbohydrate derivative binding;GO:0001882//nucleoside binding;GO:0004672//protein kinase activity;GO:0036094//small molecule binding;GO:0032550//purine ribonucleoside binding;GO:0005488//binding;GO:0016773//phosphotransferase activity…	GO:0044260//cellular macromolecule metabolic process;GO:0043170//macromolecule metabolic process;GO:0036211//protein modification process;GO:0044237//cellular metabolic process;GO:0044763//single-organism cellular process;GO:0044699//single-organism process;GO:0019538//protein metabolic process;GO:0043412//macromolecule modification;GO:0006464//cellular protein modification process;GO:0044238//pr…
Unigene0000162	33.66666667	43	1.3083	1.0672	1.2095	1.8471	1.3323	0.6068	1.195	1.262066667	0.078777502	0.914883421	1	no	-	--	-	-	-	-
Unigene0000163	5.666666667	88.66666667	0.1466	0.0714	0.2026	4.4002	0.5984	0.1715	0.1402	1.723366667	3.61967143	0.000429165	0.229334906	no	-	apolipoprotein M [Hemibarbus mylodon]	-	-	-	-
Unigene0000164	30.66666667	38	1.1438	1.2527	0.8891	1.4769	0.7407	1.0873	1.0952	1.101633333	0.008449767	1	1	no	-	--	-	-	-	-
Unigene0000165	4	2.333333333	0.3036	0	0.6293	0.1775	0.2144	0.0592	0.310966667	0.150366667	-1.048275157	0.434430157	1	no	-	--	-	-	-	-
Unigene0000166	53	63.66666667	1.7297	0.4593	1.4203	0.8407	1.4388	1.3142	1.2031	1.1979	-0.006249084	1	1	no	-	gag-like protein [Danio rerio]	-	-	-	-
Unigene0000167	21.33333333	51.66666667	0	2.4667	0	3.9507	0.5593	0.3706	0.822233333	1.626866667	0.984476252	0.477323008	1	no	Gpr87	PREDICTED: G-protein coupled receptor 87-like [Sinocyclocheilus rhinocerous]	ko04080//Neuroactive ligand-receptor interaction//Signaling molecules and interaction//Environmental Information Processing	-	-	-
Unigene0000168	11.33333333	13	0.9433	0.7064	0.8273	0.5657	0.6835	1.0754	0.825666667	0.774866667	-0.091611379	0.952300734	1	no	-	PREDICTED: metalloreductase STEAP2-like [Sinocyclocheilus rhinocerous]	-	-	-	-
Unigene0000169	11	15.66666667	1.1515	1.0463	0.3183	0.5387	0.94	1.497	0.8387	0.9919	0.242039824	0.765568566	1	no	-	--	-	-	-	-
Unigene0000170	1463	1082.666667	14.5818	8.3376	30.6507	7.4635	8.4853	15.9367	17.8567	10.6285	-0.748527485	0.153726652	1	no	BBS10	PREDICTED: Bardet-Biedl syndrome 10 protein-like isoform X1 [Sinocyclocheilus rhinocerous]	-	-	GO:0032549//ribonucleoside binding;GO:0001883//purine nucleoside binding;GO:0001882//nucleoside binding;GO:0032550//purine ribonucleoside binding;GO:1901363//heterocyclic compound binding;GO:0097159//organic cyclic compound binding;GO:0097367//carbohydrate derivative binding;GO:0005488//binding;GO:0036094//small molecule binding	GO:0071704//organic substance metabolic process;GO:0044238//primary metabolic process;GO:0019538//protein metabolic process;GO:0008152//metabolic process;GO:0043170//macromolecule metabolic process
Unigene0000171	35.33333333	49.66666667	1.7564	0.9	2.2996	1.5495	3.1347	1.2258	1.652	1.97	0.253981943	0.685963039	1	no	-	--	-	-	-	-
Unigene0000172	5	5.666666667	0.4476	0.3632	0.3093	0.4653	0.1405	0.4074	0.373366667	0.337733333	-0.144708556	1	1	no	-	--	-	-	-	-
Unigene0000173	159.6666667	211	2.775	5.9004	1.8638	5.8155	3.6594	2.1126	3.513066667	3.8625	0.136803979	0.813865389	1	no	-	PREDICTED: E3 ubiquitin-protein ligase DTX3L-like [Sinocyclocheilus rhinocerous]	ko04330//Notch signaling pathway//Signal transduction//Environmental Information Processing	-	-	-
Unigene0000174	1886	1547.333333	19.8892	18.7364	25.6718	10.6985	13.9894	18.6061	21.43246667	14.43133333	-0.570593301	0.170508873	1	no	DNAJB1	PREDICTED: dnaJ homolog subfamily B member 1-like [Sinocyclocheilus grahami]	ko04141//Protein processing in endoplasmic reticulum//Folding, sorting and degradation//Genetic Information Processing	-	GO:0005488//binding;GO:0005515//protein binding	GO:0043170//macromolecule metabolic process;GO:0008152//metabolic process;GO:0044260//cellular macromolecule metabolic process;GO:0009987//cellular process;GO:0044238//primary metabolic process;GO:0019538//protein metabolic process;GO:0044237//cellular metabolic process;GO:0071704//organic substance metabolic process;GO:0044267//cellular protein metabolic process
Unigene0000175	2	3.666666667	0.0752	0.2198	0.156	0.4693	0.1417	0.0587	0.150333333	0.223233333	0.570387535	0.758402735	1	no	-	--	-	-	-	-
Unigene0000176	139	213.6666667	1.3652	1.91	0.9224	2.0814	1.9051	1.3962	1.3992	1.794233333	0.358765325	0.474148765	1	no	GLB1L2	PREDICTED: beta-galactosidase-1-like protein 2 [Sinocyclocheilus rhinocerous]	-	-	GO:0003824//catalytic activity;GO:0004553//hydrolase activity, hydrolyzing O-glycosyl compounds;GO:0016798//hydrolase activity, acting on glycosyl bonds;GO:0016787//hydrolase activity;GO:0015925//galactosidase activity	GO:0044238//primary metabolic process;GO:0008152//metabolic process
Unigene0000177	2769.333333	3981.333333	17.6851	27.0588	14.12	26.2059	23.2516	20.803	19.6213	23.42016667	0.255330713	0.530831297	1	no	snd1	staphylococcal nuclease domain-containing protein 1 isoform p100L [Danio rerio]	-	GO:1990904//ribonucleoprotein complex;GO:0030529//intracellular ribonucleoprotein complex;GO:0005622//intracellular;GO:0044464//cell part;GO:0032991//macromolecular complex;GO:0044424//intracellular part;GO:0005623//cell;GO:0031332//RNAi effector complex	GO:0016787//hydrolase activity;GO:0003824//catalytic activity;GO:0097159//organic cyclic compound binding;GO:0016788//hydrolase activity, acting on ester bonds;GO:0005488//binding	GO:0050789//regulation of biological process;GO:0044699//single-organism process;GO:0010468//regulation of gene expression;GO:0060255//regulation of macromolecule metabolic process;GO:0009987//cellular process;GO:0065007//biological regulation;GO:0019222//regulation of metabolic process;GO:0048519//negative regulation of biological process;GO:0009892//negative regulation of metabolic process;GO:0…
Unigene0000178	15.66666667	16	0.1529	0.8558	0.7922	0.4171	0.324	0.7453	0.6003	0.495466667	-0.276895667	0.743940421	1	no	-	--	-	-	-	-
Unigene0000179	228	231.6666667	1.8574	1.7402	1.7318	1.8116	1.2517	1.3639	1.776466667	1.475733333	-0.26757857	0.561387038	1	no	Parp12	PREDICTED: poly [ADP-ribose] polymerase 12-like [Sinocyclocheilus grahami]	-	-	GO:0005488//binding;GO:0043169//cation binding;GO:0043167//ion binding	-
Unigene0000180	12.33333333	8.666666667	0.3447	0.6152	1.1909	0.4479	0.0541	0.6722	0.716933333	0.3914	-0.873195215	0.322232381	1	no	-	--	-	-	-	-
Unigene0000181	2571.666667	2346.666667	21.9475	9.3274	27.6937	8.4525	18.1555	17.9674	19.6562	14.85846667	-0.403699199	0.406984485	1	no	QflA-14927	PREDICTED: coiled-coil domain-containing protein 191-like [Sinocyclocheilus rhinocerous]	-	-	-	-
Unigene0000182	26.66666667	39.66666667	1.6206	0.4959	1.6317	1.841	1.1776	1.4808	1.2494	1.4998	0.263534694	0.685962176	1	no	rpl24	PREDICTED: 60S ribosomal protein L24-like, partial [Panthera pardus]	ko03010//Ribosome//Translation//Genetic Information Processing	-	-	-
Unigene0000183	102.6666667	148	1.3496	1.2657	1.2064	1.5349	1.5628	1.4584	1.2739	1.5187	0.25358488	0.598468677	1	no	FSBP	PREDICTED: fibrinogen silencer-binding protein-like [Sinocyclocheilus rhinocerous]	ko03440//Homologous recombination//Replication and repair//Genetic Information Processing	-	-	-
Unigene0000184	233.6666667	425.6666667	0.7313	19.9652	1.0875	27.3166	1.2279	3.3233	7.261333333	10.6226	0.548830538	0.61884246	1	no	-	PREDICTED: uncharacterized protein LOC109112478 [Cyprinus carpio]	-	-	-	-
Unigene0000185	22.66666667	51	0.9276	0.3565	0.3795	1.0848	1.3566	0.7045	0.554533333	1.048633333	0.919164222	0.147054797	1	no	KCNN3	PREDICTED: small conductance calcium-activated potassium channel protein 3 isoform X1 [Danio rerio]	-	-	-	-
Unigene0000186	4836.666667	7890.666667	29.6462	184.6852	18.9798	185.9523	79.2838	50.7333	77.7704	105.3231333	0.437529283	0.539665881	1	no	anxa2-a	PREDICTED: annexin A2-like [Sinocyclocheilus grahami]	-	-	GO:0043168//anion binding;GO:0098772//molecular function regulator;GO:0008289//lipid binding;GO:0043167//ion binding;GO:0030234//enzyme regulator activity;GO:0004857//enzyme inhibitor activity;GO:0005543//phospholipid binding;GO:0055102//lipase inhibitor activity;GO:0005515//protein binding;GO:0005488//binding	-
Unigene0000187	9.333333333	14.33333333	1.4673	0.4286	0.1521	0.4576	1.1057	1.0873	0.682666667	0.883533333	0.372103255	0.696195772	1	no	-	--	-	-	-	-
Unigene0000188	19	34.33333333	0.6265	0.6438	0.7214	0.6241	0.8195	1.4931	0.6639	0.9789	0.560195536	0.370805615	1	no	-	PREDICTED: sorbin and SH3 domain-containing protein 2-like [Sinocyclocheilus rhinocerous]	-	-	-	-
Unigene0000189	5	6.333333333	0.5737	0	0.1487	0.3354	0.0901	0.2983	0.2408	0.241266667	0.002793215	1	1	no	-	--	-	-	-	-
Unigene0000190	936.3333333	1087.333333	12.5787	15.6387	18.6276	12.6531	15.3808	16.8273	15.615	14.95373333	-0.062426858	0.881379398	1	no	rbm18	PREDICTED: probable RNA-binding protein 18 [Sinocyclocheilus rhinocerous]	-	-	GO:0005488//binding;GO:1901363//heterocyclic compound binding;GO:0003676//nucleic acid binding;GO:0036094//small molecule binding;GO:0097159//organic cyclic compound binding	-
Unigene0000191	16	12	0.9758	0.7464	1.6615	0.5977	0.9847	0.5437	1.1279	0.7087	-0.670392209	0.337997893	1	no	-	--	-	-	-	-
Unigene0000192	12	18.66666667	0.6269	1.068	1.137	1.6494	1.4761	0.5501	0.943966667	1.2252	0.376209451	0.642372945	1	no	-	--	-	-	-	-
Unigene0000193	46.66666667	91.66666667	1.0562	0.9689	0.821	2.1535	1.4157	1.0298	0.9487	1.533	0.692333845	0.206252212	1	no	-	UDP glucuronosyltransferase 2 family polypeptide a1 isoform 3 [Danio rerio]	-	-	GO:0016757//transferase activity, transferring glycosyl groups;GO:0016740//transferase activity;GO:0003824//catalytic activity	-
Unigene0000194	322	377.6666667	3.3093	3.9653	2.9683	5.0857	2.5476	2.1759	3.4143	3.269733333	-0.062416847	0.899414112	1	no	-	--	-	-	-	-
Unigene0000195	21	13.33333333	1.2472	3.0713	0.2281	0.6292	1.313	0.5723	1.515533333	0.838166667	-0.854516531	0.306381738	1	no	-	--	-	-	-	-
Unigene0000196	268.3333333	362.6666667	3.7274	2.9584	2.1073	3.0849	3.7683	3.0694	2.931033333	3.307533333	0.174346321	0.702095437	1	no	Shpk	PREDICTED: sedoheptulokinase [Sinocyclocheilus rhinocerous]	-	-	GO:0003824//catalytic activity;GO:0016740//transferase activity;GO:0016772//transferase activity, transferring phosphorus-containing groups	-
Unigene0000197	198.6666667	439.3333333	6.5258	2.0528	2.2797	9.9487	5.8044	3.9276	3.619433333	6.560233333	0.857983286	0.132128542	1	no	DDO	PREDICTED: D-aspartate oxidase-like [Sinocyclocheilus rhinocerous]	ko04146//Peroxisome//Transport and catabolism//Cellular Processes;ko00250//Alanine, aspartate and glutamate metabolism//Amino acid metabolism//Metabolism	-	GO:0003824//catalytic activity;GO:0016638//oxidoreductase activity, acting on the CH-NH2 group of donors;GO:0016491//oxidoreductase activity;GO:0016641//oxidoreductase activity, acting on the CH-NH2 group of donors, oxygen as acceptor;GO:0003884//D-amino-acid oxidase activity	GO:0008152//metabolic process;GO:0044699//single-organism process;GO:0044710//single-organism metabolic process
Unigene0000198	466.6666667	774.6666667	1.9752	4.6921	1.1465	7.3082	1.6904	1.5187	2.6046	3.505766667	0.428668149	0.514182832	1	no	THRAP3	PREDICTED: thyroid hormone receptor-associated protein 3-like isoform X2 [Sinocyclocheilus anshuiensis]	-	-	-	-
Unigene0000199	46.66666667	67	0.4551	0.9576	0.6391	0.9958	0.8989	0.5611	0.683933333	0.8186	0.259302962	0.653866464	1	no	XKR7	XK-related protein 7 [Danio rerio]	-	GO:0044425//membrane part;GO:0031224//intrinsic component of membrane;GO:0016020//membrane	-	-
Unigene0000200	64.66666667	73.33333333	0.8365	1.1198	0.9445	1.0249	1.1538	0.5826	0.966933333	0.920433333	-0.071103193	0.895623477	1	no	LYPD6B	PREDICTED: ly6/PLAUR domain-containing protein 6B-like isoform X1 [Sinocyclocheilus anshuiensis]	-	-	-	-
Unigene0000201	3.333333333	9.666666667	0.0656	0.5106	0.0679	1.0733	0.3705	0.1023	0.2147	0.515366667	1.263277037	0.29011157	1	no	Ttc22	PREDICTED: LOW QUALITY PROTEIN: tetratricopeptide repeat protein 22-like [Cyprinus carpio]	-	-	-	-
Unigene0000202	12.66666667	19.66666667	0.5164	1.1492	1.147	1.1503	0.7644	1.6113	0.937533333	1.175333333	0.326128083	0.64709126	1	no	-	--	-	-	-	-
Unigene0000203	8.333333333	13	0.2441	1.01	0.253	0.5709	0.8047	0.6188	0.502366667	0.6648	0.404179641	0.632975898	1	no	-	--	-	-	-	-
Unigene0000204	19.66666667	18.66666667	0.6754	1.6908	0.45	0.7522	1.3632	0.2258	0.938733333	0.7804	-0.266501611	0.747625888	1	no	-	--	-	-	-	-
Unigene0000205	2.666666667	10.66666667	0.2221	0.2162	0	0.6926	0.3138	0.4331	0.1461	0.479833333	1.715577205	0.085240937	1	no	-	PREDICTED: histone-lysine N-methyltransferase 2C-like isoform X19 [Salmo salar]	-	-	-	-
Unigene0000206	1053.333333	1541.666667	10.3306	19.9158	5.2714	21.6576	10.7679	10.3692	11.83926667	14.2649	0.268889911	0.608453637	1	no	optn	PREDICTED: optineurin [Sinocyclocheilus rhinocerous]	-	GO:0005623//cell;GO:0044464//cell part;GO:0005622//intracellular;GO:0044424//intracellular part	-	-
Unigene0000207	29.33333333	61.33333333	1.2262	1.6712	1.4234	2.8296	1.5245	2.9458	1.440266667	2.4333	0.756578248	0.18781577	1	no	sand	PREDICTED: vacuolar fusion protein MON1 homolog B-like [Sinocyclocheilus anshuiensis]	-	-	-	-
Unigene0000208	7.333333333	11.66666667	0.3722	0.1208	0.9	0.3869	0.2921	1.0644	0.464333333	0.581133333	0.323708357	0.766781854	1	no	PCLO	PREDICTED: protein piccolo isoform X3 [Danio rerio]	-	-	-	-
Unigene0000209	7.333333333	10	0.5915	0.2559	0.6131	0.6661	0.4333	0.5126	0.486833333	0.537333333	0.142389386	0.877688368	1	no	-	--	-	-	-	-
Unigene0000210	1451.333333	2314.666667	11.4966	79.4116	10.7343	70.3719	35.9772	28.459	33.88083333	44.93603333	0.407403419	0.547785489	1	no	IRF1	interferon regulatory factor 1 [Carassius auratus]	-	-	GO:0097159//organic cyclic compound binding;GO:1901363//heterocyclic compound binding;GO:0005488//binding;GO:0003676//nucleic acid binding	-
Unigene0000211	14	15.66666667	1.165	0.3781	1.771	1.0294	0.2195	1.6357	1.1047	0.961533333	-0.200245857	0.839734789	1	no	-	--	-	-	-	-
Unigene0000212	10.66666667	5.333333333	0.8444	0.3737	1.2731	0.419	0.2169	0.3593	0.8304	0.331733333	-1.323782459	0.119329419	1	no	-	--	-	-	-	-
Unigene0000213	12	11.66666667	1.3051	0.9716	0.4774	1.1372	0.5785	0.479	0.918033333	0.731566667	-0.327557197	0.689940883	1	no	-	--	-	-	-	-
Unigene0000214	9	8	0.2053	1.066	0.5675	0.4802	0.3223	0.5338	0.612933333	0.445433333	-0.460520641	0.61247629	1	no	-	--	-	-	-	-
Unigene0000215	6.666666667	15.33333333	0.7744	0.377	0.4013	0.966	1.8965	0.2416	0.517566667	1.0347	0.999395924	0.252993995	1	no	-	PREDICTED: low-density lipoprotein receptor class A domain-containing protein 4-like [Sinocyclocheilus grahami]	-	-	-	-
Unigene0000216	66	51.66666667	1.6141	1.5714	1.3195	1.1521	0.6424	1.064	1.501666667	0.952833333	-0.656268816	0.225931998	1	no	ERBB4	PREDICTED: receptor tyrosine-protein kinase erbB-4-like [Sinocyclocheilus grahami]	ko04020//Calcium signaling pathway//Signal transduction//Environmental Information Processing;ko04144//Endocytosis//Transport and catabolism//Cellular Processes;ko04012//ErbB signaling pathway//Signal transduction//Environmental Information Processing	-	GO:0016740//transferase activity;GO:0003824//catalytic activity;GO:0016772//transferase activity, transferring phosphorus-containing groups;GO:0004672//protein kinase activity;GO:0016773//phosphotransferase activity, alcohol group as acceptor;GO:1901363//heterocyclic compound binding;GO:0005488//binding;GO:0036094//small molecule binding;GO:0097159//organic cyclic compound binding;GO:0004713//pro…	GO:0006796//phosphate-containing compound metabolic process;GO:0006793//phosphorus metabolic process;GO:0044237//cellular metabolic process;GO:0008152//metabolic process;GO:0009987//cellular process
Unigene0000217	40.33333333	111	0.4944	0.6761	0.244	0.9544	1.774	0.6335	0.4715	1.120633333	1.248984635	0.040764097	1	no	-	PREDICTED: nesprin-1-like [Sinocyclocheilus rhinocerous]	-	-	-	-
Unigene0000218	3.333333333	14	0.1953	0.1141	0.081	0.335	0.8095	0.2742	0.130133333	0.4729	1.86154459	0.033065803	1	no	EPS15	PREDICTED: extracellular matrix-binding protein ebh-like, partial [Sinocyclocheilus anshuiensis]	-	-	-	-
Unigene0000219	96.66666667	172.6666667	2.1967	3.135	1.8887	2.53	6.6776	2.025	2.4068	3.7442	0.637541238	0.266074099	1	no	-	PREDICTED: extracellular matrix-binding protein ebh-like, partial [Sinocyclocheilus anshuiensis]	-	-	-	-
Unigene0000220	544.6666667	746	3.0492	3.1936	2.7611	3.244	5.1221	2.1208	3.0013	3.495633333	0.219966331	0.630430143	1	no	SORCS3	PREDICTED: VPS10 domain-containing receptor SorCS3-like [Sinocyclocheilus grahami]	-	-	-	-
Unigene0000221	54	42	0.6899	0.8769	1.5692	0.5976	0.9387	0.5082	1.045333333	0.6815	-0.617177497	0.296322922	1	no	-	--	-	-	-	-
Unigene0000222	2504.666667	3472	10.8406	10.515	8.6431	11.6463	12.0976	10.7464	9.999566667	11.49676667	0.201290695	0.598719522	1	no	CCNT2	PREDICTED: cyclin-T2-like isoform X1 [Sinocyclocheilus rhinocerous]	-	-	-	GO:0010467//gene expression;GO:0051726//regulation of cell cycle;GO:0009058//biosynthetic process;GO:0090304//nucleic acid metabolic process;GO:0034645//cellular macromolecule biosynthetic process;GO:0044271//cellular nitrogen compound biosynthetic process;GO:0050789//regulation of biological process;GO:0019438//aromatic compound biosynthetic process;GO:0044260//cellular macromolecule metabolic p…
Unigene0000223	53.66666667	76	0.9991	0.8135	1.1297	1.9544	0.4449	0.9068	0.980766667	1.102033333	0.16818601	0.792216507	1	no	-	--	-	-	-	-
Unigene0000224	10.66666667	34.33333333	0	2.4197	0	4.9048	0.5853	0.8482	0.806566667	2.112766667	1.389267756	0.284130388	1	no	-	--	-	-	-	-
Unigene0000225	8.666666667	7.333333333	1.3204	0.2268	0.483	0.0606	0.2926	1.0299	0.676733333	0.461033333	-0.553716389	0.633438263	1	no	-	--	-	-	-	-
Unigene0000226	13.33333333	26	0.812	1.3987	0.259	0.7792	3.236	0.3411	0.823233333	1.4521	0.818767505	0.355220313	1	no	BTBD11	PREDICTED: ankyrin repeat and BTB/POZ domain-containing protein 2-like [Sinocyclocheilus rhinocerous]	-	-	-	-
Unigene0000227	8	12.66666667	0.8494	0.3007	0.7203	0.903	0.8	0.7228	0.623466667	0.8086	0.375113774	0.687878083	1	no	-	PREDICTED: receptor tyrosine-protein kinase erbB-4-like, partial [Notothenia coriiceps]	ko03013//RNA transport//Translation//Genetic Information Processing	-	-	-
Unigene0000228	1736	1793.333333	12.322	8.4182	14.5334	10.1829	6.474	12.6457	11.75786667	9.767533333	-0.267560144	0.538094873	1	no	TINF2	PREDICTED: TERF1-interacting nuclear factor 2-like [Cyprinus carpio]	-	-	-	-
Unigene0000229	48.66666667	58	3.6116	1.91	0.9705	1.7729	3.3178	1.5303	2.164033333	2.207	0.028363908	0.977063949	1	no	-	--	-	-	-	-
Unigene0000230	1.333333333	0.666666667	0.1035	0.2014	0.1072	0.0807	0.0974	0	0.137366667	0.059366667	-1.210306947	0.738505982	1	no	-	--	-	-	-	-
Unigene0000231	20.66666667	22	0.9224	1.5394	1.6389	1.3868	1.055	1.1306	1.3669	1.1908	-0.198976575	0.762282569	1	no	-	--	-	-	-	-
Unigene0000232	12	23	0.4414	1.2355	0.2859	1.8928	0.8316	0.3874	0.654266667	1.037266667	0.664836163	0.417324229	1	no	-	--	-	-	-	-
Unigene0000233	3000	3541	20.1957	19.3138	21.3866	16.7386	19.8356	22.6831	20.2987	19.75243333	-0.039356943	0.918193422	1	no	FBXW5	PREDICTED: F-box/WD repeat-containing protein 5-like [Sinocyclocheilus grahami]	-	GO:0000151//ubiquitin ligase complex;GO:1902494//catalytic complex;GO:1990234//transferase complex;GO:0043234//protein complex;GO:0005623//cell;GO:0005622//intracellular;GO:0031461//cullin-RING ubiquitin ligase complex;GO:0044424//intracellular part;GO:0032991//macromolecular complex;GO:0044464//cell part	-	GO:0009057//macromolecule catabolic process;GO:0006511//ubiquitin-dependent protein catabolic process;GO:0016043//cellular component organization;GO:0044257//cellular protein catabolic process;GO:0043170//macromolecule metabolic process;GO:0044267//cellular protein metabolic process;GO:0044260//cellular macromolecule metabolic process;GO:0006508//proteolysis;GO:0007098//centrosome cycle;GO:002240…
Unigene0000234	627.6666667	846.3333333	1.9382	3.0861	1.6336	2.8616	2.4676	2.1237	2.2193	2.4843	0.162734701	0.712864114	1	no	nav3	PREDICTED: LOW QUALITY PROTEIN: neuron navigator 3 [Sinocyclocheilus grahami]	-	-	-	-
Unigene0000235	4.333333333	8	0.1615	0.0786	0.8369	1.385	0	0.126	0.359	0.503666667	0.488485411	0.755463133	1	no	-	PREDICTED: vegetative cell wall protein gp1-like [Sinocyclocheilus rhinocerous]	-	-	-	-
Unigene0000236	6.666666667	8	1.0005	0.0573	0.122	0.413	0.2772	0.4591	0.393266667	0.3831	-0.037786883	1	1	no	-	--	-	-	-	-
Unigene0000237	16.33333333	34.66666667	0.8092	0.3636	0.3548	0.922	1.2312	0.5826	0.5092	0.911933333	0.840695941	0.203867397	1	no	-	--	-	-	-	-
Unigene0000238	87	217	2.3078	2.3538	1.0479	6.1346	3.4988	2.1259	1.903166667	3.919766667	1.042365868	0.066304022	1	no	-	--	-	-	-	-
Unigene0000239	17	50.33333333	0.7711	0.5222	0.417	2.1694	0.9473	0.9937	0.5701	1.370133333	1.265029388	0.044469282	1	no	Hfe2	PREDICTED: hemojuvelin-like [Sinocyclocheilus rhinocerous]	-	-	-	GO:0044707//single-multicellular organism process;GO:0032502//developmental process;GO:0048856//anatomical structure development;GO:0007275//multicellular organism development;GO:0009790//embryo development;GO:0048568//embryonic organ development;GO:0044699//single-organism process;GO:0048731//system development;GO:0032501//multicellular organismal process;GO:0048513//animal organ development;GO:…
Unigene0000240	252	770	3.6817	1.9591	1.1691	8.5901	4.4964	3.9417	2.269966667	5.676066667	1.322220422	0.013138927	0.984885363	no	PAPSS2	PREDICTED: bifunctional 3'-phosphoadenosine 5'-phosphosulfate synthase 2-like [Sinocyclocheilus grahami]	ko01100//Metabolic pathways//Global and Overview//Metabolism;ko01130//Biosynthesis of antibiotics//Global and Overview//Metabolism;ko00230//Purine metabolism//Nucleotide metabolism//Metabolism;ko01120//Microbial metabolism in diverse environments//Global and Overview//Metabolism;ko00450//Selenocompound metabolism//Metabolism of other amino acids//Metabolism;ko00920//Sulfur metabolism//Energy meta…	-	GO:0001883//purine nucleoside binding;GO:0016740//transferase activity;GO:0032550//purine ribonucleoside binding;GO:0032549//ribonucleoside binding;GO:0016301//kinase activity;GO:0004779//sulfate adenylyltransferase activity;GO:0016779//nucleotidyltransferase activity;GO:0097367//carbohydrate derivative binding;GO:0097159//organic cyclic compound binding;GO:0036094//small molecule binding;GO:0005…	GO:0008152//metabolic process;GO:0044237//cellular metabolic process;GO:0009987//cellular process;GO:0006790//sulfur compound metabolic process
Unigene0000241	43.33333333	43.33333333	0.8555	0.6996	0.6739	0.5469	0.564	0.7207	0.743	0.610533333	-0.283292146	0.602353122	1	no	CHRNA9	PREDICTED: neuronal acetylcholine receptor subunit alpha-9-II-like [Sinocyclocheilus anshuiensis]	ko04080//Neuroactive ligand-receptor interaction//Signaling molecules and interaction//Environmental Information Processing	GO:0097060//synaptic membrane;GO:0016020//membrane;GO:0005886//plasma membrane;GO:0045202//synapse;GO:0031224//intrinsic component of membrane;GO:0098805//whole membrane;GO:0098590//plasma membrane region;GO:0044456//synapse part;GO:0044464//cell part;GO:0071944//cell periphery;GO:0044459//plasma membrane part;GO:0005623//cell;GO:0098589//membrane region;GO:0044425//membrane part	GO:0005216//ion channel activity;GO:0022836//gated channel activity;GO:0022857//transmembrane transporter activity;GO:0022892//substrate-specific transporter activity;GO:0015276//ligand-gated ion channel activity;GO:0060089//molecular transducer activity;GO:0004872//receptor activity;GO:0022838//substrate-specific channel activity;GO:0022834//ligand-gated channel activity;GO:0099600//transmembran…	GO:0044763//single-organism cellular process;GO:0048562//embryonic organ morphogenesis;GO:0030003//cellular cation homeostasis;GO:0072503//cellular divalent inorganic cation homeostasis;GO:0007275//multicellular organism development;GO:0009790//embryo development;GO:0044699//single-organism process;GO:0055080//cation homeostasis;GO:0048513//animal organ development;GO:0098771//inorganic ion homeo…
Unigene0000242	115	212	1.8811	1.613	0.7876	3.176	1.9479	1.3896	1.427233333	2.171166667	0.605249262	0.264782045	1	no	Jakmip3	PREDICTED: janus kinase and microtubule-interacting protein 3 isoform X2 [Sinocyclocheilus grahami]	-	-	-	-
Unigene0000243	30.66666667	59.66666667	0.4184	1.0794	0.412	1.0765	1.0838	0.9465	0.6366	1.0356	0.702007808	0.239043202	1	no	Gucy2e	PREDICTED: retinal guanylyl cyclase 2-like [Sinocyclocheilus grahami]	-	GO:0031224//intrinsic component of membrane;GO:0016020//membrane;GO:0044425//membrane part	GO:1901363//heterocyclic compound binding;GO:0016740//transferase activity;GO:0009975//cyclase activity;GO:0005488//binding;GO:0036094//small molecule binding;GO:0016829//lyase activity;GO:0097159//organic cyclic compound binding;GO:0003824//catalytic activity;GO:0016301//kinase activity;GO:0032550//purine ribonucleoside binding;GO:0032549//ribonucleoside binding;GO:0001883//purine nucleoside bin…	GO:0044763//single-organism cellular process;GO:1901360//organic cyclic compound metabolic process;GO:0034641//cellular nitrogen compound metabolic process;GO:0006793//phosphorus metabolic process;GO:0051716//cellular response to stimulus;GO:0009987//cellular process;GO:0009058//biosynthetic process;GO:0007154//cell communication;GO:0044711//single-organism biosynthetic process;GO:0046483//hetero…
Unigene0000244	9	16	0.8472	0.0868	0.2773	0.4171	0.924	0.4869	0.403766667	0.609333333	0.593709852	0.505662184	1	no	-	PREDICTED: fibroleukin-like [Cyprinus carpio]	-	-	-	-
Unigene0000245	12.33333333	9.666666667	1.0141	0.8711	0.3091	0.8371	0.2247	0.3257	0.731433333	0.4625	-0.66127301	0.422700727	1	no	-	--	-	-	-	-
Unigene0000246	33.66666667	33.33333333	2.7725	3.1254	1.4368	2.6735	1.6494	1.6504	2.4449	1.9911	-0.296209778	0.640599566	1	no	-	--	-	-	-	-
Unigene0000247	11	19	0.3493	0.6234	0.9653	0.3631	0.7676	1.5891	0.646	0.9066	0.488931996	0.564063075	1	no	-	--	-	-	-	-
Unigene0000248	984.3333333	1050.333333	13.6407	13.139	16.1945	9.4606	12.944	15.4065	14.32473333	12.6037	-0.184660962	0.659754384	1	no	RGP1	PREDICTED: RAB6A-GEF complex partner protein 2-like isoform X1 [Cyprinus carpio]	-	-	-	-
Unigene0000249	15.66666667	16.66666667	0.7158	0.6969	2.0032	0.9487	1.2136	0.8375	1.138633333	0.999933333	-0.187399423	0.828790988	1	no	Gripap1	PREDICTED: GRIP1-associated protein 1 [Astyanax mexicanus]	-	-	-	-
Unigene0000250	202.6666667	139	3.5313	8.0138	3.4797	1.7256	5.7624	1.5906	5.008266667	3.0262	-0.726804043	0.236234882	1	no	Cldn4	PREDICTED: claudin-4-like [Sinocyclocheilus anshuiensis]	ko04530//Tight junction//Cellular commiunity//Cellular Processes;ko04514//Cell adhesion molecules (CAMs)//Signaling molecules and interaction//Environmental Information Processing	GO:0031224//intrinsic component of membrane;GO:0005911//cell-cell junction;GO:0016020//membrane;GO:0030054//cell junction;GO:0043296//apical junction complex;GO:0044425//membrane part	-	GO:0044767//single-organism developmental process;GO:0044707//single-multicellular organism process;GO:0048731//system development;GO:0007275//multicellular organism development;GO:0044699//single-organism process;GO:0032502//developmental process;GO:0048856//anatomical structure development;GO:0048513//animal organ development;GO:0032501//multicellular organismal process;GO:0007423//sensory orga…
Unigene0000251	6.666666667	10.66666667	0.7267	0.3931	0.5022	0.5036	0.5324	1.0707	0.540666667	0.702233333	0.377211065	0.648155719	1	no	-	--	-	-	-	-
Unigene0000252	7.333333333	16.33333333	0.5582	0.1812	0.6429	0.8221	0.8179	0.8709	0.460766667	0.836966667	0.861133815	0.277305119	1	no	-	PREDICTED: uncharacterized protein LOC101477648 [Maylandia zebra]	-	-	-	-
Unigene0000253	9	12.66666667	0.5193	0.3371	0.7177	0.2699	0.9783	0.6301	0.5247	0.6261	0.254900311	0.767698328	1	no	-	--	-	-	-	-
Unigene0000254	1538	1692	32.0092	43.4151	27.1279	33.656	35.4166	25.1936	34.18406667	31.42206667	-0.121545964	0.768851694	1	no	cript	PREDICTED: cysteine-rich PDZ-binding protein [Sinocyclocheilus grahami]	-	GO:0005622//intracellular;GO:0044464//cell part;GO:0044424//intracellular part;GO:0005623//cell	-	-
Unigene0000255	41.33333333	109	1.9715	1.6296	1.0024	2.9581	4.4848	2.8145	1.5345	3.419133333	1.155862038	0.03530812	1	no	-	--	-	-	-	-
Unigene0000256	18.66666667	22.33333333	0.7733	0.941	1.0019	0.9797	0.9105	0.7917	0.9054	0.893966667	-0.018334268	1	1	no	-	--	-	-	-	-
Unigene0000257	7.666666667	6.666666667	0.4593	1.1178	0.1587	0.6565	0.5047	0.1194	0.5786	0.426866667	-0.438780814	0.662471352	1	no	-	--	-	-	-	-
Unigene0000258	41.66666667	30.33333333	2.5401	0.8573	0.8425	0.3433	1.7865	0.5812	1.4133	0.903666667	-0.645205125	0.376480466	1	no	Adm2	PREDICTED: ADM2-like [Sinocyclocheilus rhinocerous]	-	-	-	-
Unigene0000259	21.66666667	12.66666667	1.468	0.2382	2.3457	0.5246	0.8066	0.6202	1.350633333	0.650466667	-1.054089036	0.194169168	1	no	-	--	-	-	-	-
Unigene0000260	1890	1735	16.7111	17.9975	20.2208	12.5847	14.5864	14.5025	18.3098	13.8912	-0.3984448	0.308394978	1	no	slc30a5	PREDICTED: zinc transporter 5-like [Sinocyclocheilus rhinocerous]	-	GO:0044425//membrane part;GO:0031224//intrinsic component of membrane;GO:0043226//organelle;GO:0043229//intracellular organelle;GO:0005623//cell;GO:0044424//intracellular part;GO:0044464//cell part;GO:0043227//membrane-bounded organelle;GO:0016020//membrane;GO:0005622//intracellular;GO:0043231//intracellular membrane-bounded organelle	GO:0022890//inorganic cation transmembrane transporter activity;GO:0046915//transition metal ion transmembrane transporter activity;GO:0015075//ion transmembrane transporter activity;GO:0022857//transmembrane transporter activity;GO:0022892//substrate-specific transporter activity;GO:0046873//metal ion transmembrane transporter activity;GO:0022891//substrate-specific transmembrane transporter act…	GO:0006811//ion transport;GO:0044699//single-organism process;GO:0006829//zinc II ion transport;GO:0070838//divalent metal ion transport;GO:0006810//transport;GO:0030001//metal ion transport;GO:0051179//localization;GO:0006812//cation transport;GO:0044763//single-organism cellular process;GO:0009987//cellular process;GO:0072511//divalent inorganic cation transport;GO:1902578//single-organism loca…
Unigene0000261	2	67.33333333	0	0.1421	0.3025	0	1.3745	10.3578	0.1482	3.910766667	4.721834108	0.001378086	0.435082523	no	fxyd2	PREDICTED: sodium/potassium-transporting ATPase subunit gamma-like [Sinocyclocheilus anshuiensis]	-	-	-	-
Unigene0000262	144.6666667	224.6666667	1.4203	1.1659	1.4625	1.9107	1.504	1.7234	1.349566667	1.7127	0.343776223	0.460521633	1	no	Unc13b	PREDICTED: protein unc-13 homolog B-like isoform X2 [Cyprinus carpio]	-	-	-	-
Unigene0000263	82.33333333	113	3.9699	5.4661	4.585	5.3058	4.6475	5.8393	4.673666667	5.2642	0.171659459	0.737581368	1	no	-	--	-	-	-	-
Unigene0000264	47.66666667	61.33333333	0.8544	1.2781	0.8423	0.7148	1.2365	1.2516	0.9916	1.067633333	0.106586078	0.85724573	1	no	CYP21A2	PREDICTED: steroid 21-hydroxylase-like [Sinocyclocheilus anshuiensis]	ko01100//Metabolic pathways//Global and Overview//Metabolism;ko00140//Steroid hormone biosynthesis//Lipid metabolism//Metabolism	-	GO:0046914//transition metal ion binding;GO:1901363//heterocyclic compound binding;GO:0043169//cation binding;GO:0097159//organic cyclic compound binding;GO:0003824//catalytic activity;GO:0016491//oxidoreductase activity;GO:0046906//tetrapyrrole binding;GO:0046872//metal ion binding;GO:0043167//ion binding;GO:0005488//binding	GO:0044710//single-organism metabolic process;GO:0044699//single-organism process;GO:0008152//metabolic process
Unigene0000265	57.33333333	60	1.708	0.9111	1.4308	0.8208	1.4104	1.2957	1.349966667	1.175633333	-0.199485615	0.719883229	1	no	adprhl1	PREDICTED: protein ADP-ribosylarginine hydrolase-like protein 1 [Sinocyclocheilus anshuiensis]	-	-	GO:0005488//binding;GO:0043169//cation binding;GO:0043167//ion binding;GO:0046872//metal ion binding;GO:0016799//hydrolase activity, hydrolyzing N-glycosyl compounds;GO:0003824//catalytic activity;GO:0016798//hydrolase activity, acting on glycosyl bonds;GO:0016787//hydrolase activity	GO:0006464//cellular protein modification process;GO:0044260//cellular macromolecule metabolic process;GO:0044237//cellular metabolic process;GO:0009987//cellular process;GO:0043412//macromolecule modification;GO:0019538//protein metabolic process;GO:0071704//organic substance metabolic process;GO:0044238//primary metabolic process;GO:0036211//protein modification process;GO:0008152//metabolic pr…
Unigene0000266	10.33333333	11	0.9573	0.3883	1.1576	0.8085	0.1503	1.1201	0.8344	0.692966667	-0.267953201	0.821890516	1	no	-	--	-	-	-	-
Unigene0000267	82.66666667	86.66666667	2.9046	4.4648	2.0598	4.6482	1.8719	1.5502	3.143066667	2.6901	-0.224513069	0.710925114	1	no	-	--	-	-	-	-
Unigene0000268	5.666666667	12	0.0697	0.475	0.6502	0.9781	0.8534	0.2718	0.3983	0.7011	0.815764755	0.396006386	1	no	-	--	-	-	-	-
Unigene0000269	30.66666667	34.66666667	2.1863	1.0338	2.5897	1.8506	1.0002	2.3874	1.9366	1.746066667	-0.149417356	0.828209972	1	no	-	--	-	-	-	-
Unigene0000270	278.6666667	260	2.0519	1.635	2.0004	1.246	1.2375	1.8488	1.895766667	1.4441	-0.392610758	0.392560717	1	no	Kirrel	PREDICTED: kin of IRRE-like protein 1 isoform X1 [Sinocyclocheilus rhinocerous]	-	-	-	GO:0044707//single-multicellular organism process;GO:0072010//glomerular epithelium development;GO:0072001//renal system development;GO:0016043//cellular component organization;GO:0048731//system development;GO:0044767//single-organism developmental process;GO:0048513//animal organ development;GO:0032501//multicellular organismal process;GO:0072073//kidney epithelium development;GO:0044763//singl…
Unigene0000271	965.6666667	802.3333333	16.7431	5.8205	19.0907	11.6474	8.0392	8.3521	13.88476667	9.346233333	-0.571045973	0.249048437	1	no	Pim1	PREDICTED: serine/threonine-protein kinase pim-2-like [Sinocyclocheilus rhinocerous]	-	-	-	-
Unigene0000272	2254.666667	2114.333333	38.8699	31.7141	27.8579	21.0339	30.8618	25.3188	32.81396667	25.73816667	-0.350400709	0.381166847	1	no	UMPS	PREDICTED: uridine 5'-monophosphate synthase [Sinocyclocheilus rhinocerous]	ko01100//Metabolic pathways//Global and Overview//Metabolism;ko00240//Pyrimidine metabolism//Nucleotide metabolism//Metabolism;ko00983//Drug metabolism - other enzymes//Xenobiotics biodegradation and metabolism//Metabolism	-	GO:0016757//transferase activity, transferring glycosyl groups;GO:0016830//carbon-carbon lyase activity;GO:0016740//transferase activity;GO:0016831//carboxy-lyase activity;GO:0016763//transferase activity, transferring pentosyl groups;GO:0003824//catalytic activity;GO:0016829//lyase activity	GO:0019637//organophosphate metabolic process;GO:0006220//pyrimidine nucleotide metabolic process;GO:0019438//aromatic compound biosynthetic process;GO:0044281//small molecule metabolic process;GO:0044763//single-organism cellular process;GO:0042455//ribonucleoside biosynthetic process;GO:0008152//metabolic process;GO:0046390//ribose phosphate biosynthetic process;GO:0006221//pyrimidine nucleotid…
Unigene0000273	22.66666667	13	1.8662	1.5373	1.4879	1.2311	0.4732	0.5599	1.630466667	0.754733333	-1.111246048	0.09026614	1	no	-	--	-	-	-	-
Unigene0000274	14	21.66666667	0.1919	0.8097	0.3315	0.6484	0.4519	0.5988	0.444366667	0.566366667	0.349985759	0.657385821	1	no	UCN3	PREDICTED: urocortin-3-like [Sinocyclocheilus rhinocerous]	ko04080//Neuroactive ligand-receptor interaction//Signaling molecules and interaction//Environmental Information Processing	GO:0044421//extracellular region part;GO:0005576//extracellular region	-	GO:0032501//multicellular organismal process;GO:0044699//single-organism process;GO:0050896//response to stimulus;GO:0044707//single-multicellular organism process
Unigene0000275	1173	799.3333333	9.5265	5.1569	14.3591	3.577	4.0222	8.3334	9.680833333	5.310866667	-0.866183931	0.08780367	1	no	DNAJB5	PREDICTED: dnaJ homolog subfamily B member 5-like isoform X1 [Sinocyclocheilus rhinocerous]	-	-	GO:0005488//binding;GO:0005515//protein binding	-
Unigene0000276	27	13.66666667	1.2673	0.6043	0.2145	0.363	0.2923	0.2219	0.695366667	0.2924	-1.2498306	0.092755438	1	no	-	PREDICTED: uncharacterized protein LOC109202850 [Oreochromis niloticus]	-	-	-	-
Unigene0000277	12.33333333	20.33333333	1.5474	0.0579	0.6169	1.0672	0.2803	1.532	0.740733333	0.959833333	0.373829656	0.708715043	1	no	-	--	-	-	-	-
Unigene0000278	9.666666667	57.33333333	0.2543	0.2682	0.0878	1.0077	1.4369	0.6446	0.203433333	1.029733333	2.339642781	0.000533437	0.266571609	no	-	--	-	-	-	-
Unigene0000279	1051	905	18.4021	15.3267	22.158	12.5347	11.9592	14.8485	18.62893333	13.11413333	-0.506422602	0.22184922	1	no	Mrgbp	PREDICTED: MRG/MORF4L-binding protein isoform X1 [Danio rerio]	-	GO:0031248//protein acetyltransferase complex;GO:0044424//intracellular part;GO:0005623//cell;GO:0043231//intracellular membrane-bounded organelle;GO:1990234//transferase complex;GO:0044428//nuclear part;GO:0070013//intracellular organelle lumen;GO:0005622//intracellular;GO:0005634//nucleus;GO:1902493//acetyltransferase complex;GO:0005654//nucleoplasm;GO:0031974//membrane-enclosed lumen;GO:004322…	-	GO:0032774//RNA biosynthetic process;GO:0009058//biosynthetic process;GO:0034645//cellular macromolecule biosynthetic process;GO:0044260//cellular macromolecule metabolic process;GO:0046483//heterocycle metabolic process;GO:0008152//metabolic process;GO:0006351//transcription, DNA-templated;GO:0016070//RNA metabolic process;GO:0018130//heterocycle biosynthetic process;GO:0034641//cellular nitroge…
Unigene0000280	29.33333333	83	0.1597	1.1853	0.393	3.221	0.3572	0.3581	0.579333333	1.3121	1.179412096	0.194832063	1	no	F2RL2	PREDICTED: proteinase-activated receptor 3 [Danio rerio]	ko04080//Neuroactive ligand-receptor interaction//Signaling molecules and interaction//Environmental Information Processing	GO:0044425//membrane part;GO:0031224//intrinsic component of membrane;GO:0016020//membrane	GO:0016787//hydrolase activity;GO:0004871//signal transducer activity;GO:0008528//G-protein coupled peptide receptor activity;GO:0060089//molecular transducer activity;GO:0004930//G-protein coupled receptor activity;GO:0001653//peptide receptor activity;GO:0003824//catalytic activity;GO:0099600//transmembrane receptor activity;GO:0004888//transmembrane signaling receptor activity;GO:0004872//rece…	GO:0007186//G-protein coupled receptor signaling pathway;GO:0050789//regulation of biological process;GO:0008152//metabolic process;GO:0051604//protein maturation;GO:0051716//cellular response to stimulus;GO:0007165//signal transduction;GO:0007154//cell communication;GO:0044700//single organism signaling;GO:0010467//gene expression;GO:0043170//macromolecule metabolic process;GO:0050794//regulatio…
Unigene0000281	5.333333333	9.333333333	0.7496	0	0.259	0.2922	0.8237	0.3898	0.3362	0.5019	0.578080222	0.642061883	1	no	drl	PREDICTED: gastrula zinc finger protein XlCGF8.2DB-like [Sinocyclocheilus grahami]	-	-	-	-
Unigene0000282	11.33333333	15.66666667	0.8149	0.7934	0.362	1.0892	0.9321	0.2724	0.656766667	0.764566667	0.219261397	0.805900722	1	no	-	--	-	-	-	-
Unigene0000283	137.3333333	247	0.9089	0.8119	0.4765	0.8003	1.3647	1.1593	0.732433333	1.1081	0.597318727	0.232235	1	no	HMCN1	PREDICTED: hemicentin-1-like [Sinocyclocheilus rhinocerous]	-	-	-	GO:0048856//anatomical structure development;GO:0032502//developmental process;GO:0007275//multicellular organism development;GO:0033333//fin development;GO:0044767//single-organism developmental process;GO:0044699//single-organism process;GO:0044707//single-multicellular organism process;GO:0032501//multicellular organismal process;GO:0048736//appendage development
Unigene0000284	301.6666667	389.6666667	6.3277	4.4362	7.3836	6.1589	5.8478	7.1398	6.049166667	6.382166667	0.077309874	0.865151839	1	no	-	--	-	-	-	-
Unigene0000285	10	14.66666667	0.4176	0.4646	0.9274	0.5581	0.6181	0.9771	0.6032	0.717766667	0.250878497	0.732178752	1	no	-	--	-	-	-	-
Unigene0000286	159.6666667	247	2.297	3.7101	2.3086	3.9886	4.3108	2.4975	2.7719	3.598966667	0.376707529	0.443741532	1	no	-	--	-	-	-	-
Unigene0000287	16.33333333	14	1.2091	0.0561	1.6113	0.3591	0.5423	1.0778	0.958833333	0.659733333	-0.539397065	0.570953107	1	no	-	--	-	-	-	-
Unigene0000288	6.333333333	15.66666667	0.7101	0.2765	0.368	0.4982	1.3376	0.9969	0.451533333	0.944233333	1.064310919	0.174141805	1	no	-	--	-	-	-	-
Unigene0000289	283.3333333	302	3.2041	5.1172	1.8035	4.9961	2.1929	1.6662	3.374933333	2.951733333	-0.193296613	0.732950116	1	no	-	--	-	-	-	-
Unigene0000290	20.33333333	15	1.6553	1.5518	0.5084	1.0993	0.8662	0.3347	1.2385	0.766733333	-0.691797062	0.357118087	1	no	-	--	-	-	-	-
Unigene0000291	951	1568.666667	5.9644	4.3366	4.0848	9.3001	5.1534	4.9036	4.795266667	6.452366667	0.428217378	0.330637846	1	no	GK	PREDICTED: glycerol kinase-like isoform X5 [Sinocyclocheilus anshuiensis]	ko01100//Metabolic pathways//Global and Overview//Metabolism;ko03320//PPAR signaling pathway//Endocrine system//Organismal Systems;ko00561//Glycerolipid metabolism//Lipid metabolism//Metabolism	-	-	-
Unigene0000292	8.333333333	15.33333333	0.9719	0.7885	0.2518	0.442	1.5258	1.2004	0.670733333	1.056066667	0.654889705	0.415834769	1	no	-	--	-	-	-	-
Unigene0000293	237.6666667	315.3333333	1.619	0.963	1.3803	1.3312	1.5719	1.4439	1.320766667	1.449	0.13368198	0.773486525	1	no	TTLL7	PREDICTED: tubulin polyglutamylase TTLL7 [Sinocyclocheilus rhinocerous]	-	-	-	GO:0018193//peptidyl-amino acid modification;GO:0043412//macromolecule modification;GO:0044238//primary metabolic process;GO:0009987//cellular process;GO:0008152//metabolic process;GO:0071704//organic substance metabolic process;GO:0044260//cellular macromolecule metabolic process;GO:0019538//protein metabolic process;GO:0043170//macromolecule metabolic process;GO:0018200//peptidyl-glutamic acid …
Unigene0000294	4	5.666666667	0.4064	0.3297	0.0702	0.3169	0.4466	0.2113	0.268766667	0.324933333	0.273789529	0.824375992	1	no	-	--	-	-	-	-
Unigene0000295	48.33333333	65	3.0013	1.5378	3.1653	1.7652	3.4717	3.3678	2.568133333	2.868233333	0.159442287	0.786401657	1	no	-	PREDICTED: SH3 domain-containing protein C23A1.17-like [Sinocyclocheilus anshuiensis]	-	-	-	-
Unigene0000296	81.33333333	95.33333333	8.2892	7.7747	8.6964	5.2804	9.3313	9.5409	8.253433333	8.050866667	-0.035850293	0.957662907	1	no	-	--	-	-	-	-
Unigene0000297	71.33333333	65	4.3271	7.9169	3.6344	3.8389	6.0435	2.5023	5.2928	4.128233333	-0.358506623	0.541777019	1	no	Wfdc3	PREDICTED: WAP four-disulfide core domain protein 3-like [Sinocyclocheilus anshuiensis]	-	-	-	-
Unigene0000298	652.6666667	741	7.9353	9.1537	7.9206	8.2555	8.6761	6.6773	8.336533333	7.869633333	-0.083151159	0.84212881	1	no	Rpp40	PREDICTED: ribonuclease P protein subunit p40-like [Sinocyclocheilus rhinocerous]	ko03013//RNA transport//Translation//Genetic Information Processing;ko03008//Ribosome biogenesis in eukaryotes//Translation//Genetic Information Processing	-	-	-
Unigene0000299	119	207.3333333	1.4857	1.3158	0.8769	2.928	1.4383	0.8853	1.226133333	1.750533333	0.513678663	0.354844695	1	no	-	PREDICTED: CCR4-NOT transcription complex subunit 6-like isoform X4 [Sinocyclocheilus grahami]	-	-	-	-
Unigene0000300	16	15.33333333	1.5753	0.7668	0	0.6525	0	1.1136	0.7807	0.5887	-0.407235642	0.748161078	1	no	-	PREDICTED: uncharacterized protein LOC101885994 [Danio rerio]	-	-	-	-
Unigene0000301	244	272	13.0244	15.4707	17.3104	10.2514	15.9073	16.2353	15.2685	14.13133333	-0.111660742	0.81165218	1	no	-	--	-	-	-	-
Unigene0000302	12	9.333333333	1.095	0.4664	0.9221	0.5336	0.9669	0.1601	0.827833333	0.553533333	-0.580670143	0.463195489	1	no	-	PREDICTED: RNA-directed DNA polymerase from mobile element jockey-like [Danio rerio]	-	-	-	-
Unigene0000303	99.33333333	161.3333333	0.896	0.852	0.3096	0.9423	1.0141	0.8398	0.685866667	0.932066667	0.442505006	0.415261723	1	no	LRFN2	PREDICTED: leucine-rich repeat and fibronectin type-III domain-containing protein 2-like [Sinocyclocheilus grahami]	-	-	-	-
Unigene0000304	162.3333333	203.3333333	8.2269	18.4777	8.2279	17.8917	11.2159	7.1489	11.64416667	12.0855	0.053669767	0.921984404	1	no	-	--	-	-	-	-
Unigene0000305	2567.666667	3489.333333	18.1468	18.3465	15.2599	23.0301	17.4786	17.302	17.25106667	19.27023333	0.159688471	0.680164926	1	no	GANAB	PREDICTED: neutral alpha-glucosidase AB-like isoform X1 [Sinocyclocheilus grahami]	ko01100//Metabolic pathways//Global and Overview//Metabolism;ko04141//Protein processing in endoplasmic reticulum//Folding, sorting and degradation//Genetic Information Processing;ko00510//N-Glycan biosynthesis//Glycan biosynthesis and metabolism//Metabolism	-	-	-
Unigene0000306	615	851.6666667	12.7905	17.8643	10.9383	16.4202	16.092	15.2825	13.86436667	15.93156667	0.20050643	0.6377156	1	no	-	PREDICTED: TBC1 domain family member 5-like [Sinocyclocheilus grahami]	-	-	GO:0030234//enzyme regulator activity;GO:0005096//GTPase activator activity;GO:0008047//enzyme activator activity;GO:0030695//GTPase regulator activity;GO:0060589//nucleoside-triphosphatase regulator activity;GO:0098772//molecular function regulator	-
Unigene0000307	6.666666667	7	0.4683	0.2026	0.3775	0.4868	0.196	0.2029	0.349466667	0.295233333	-0.243299235	0.861459114	1	no	-	--	-	-	-	-
Unigene0000308	633.3333333	718.6666667	2.9792	3.2975	3.9725	3.1345	2.6797	3.672	3.4164	3.162066667	-0.111609114	0.792021465	1	no	nphp3	PREDICTED: nephrocystin-3-like [Sinocyclocheilus anshuiensis]	-	-	-	GO:0044767//single-organism developmental process;GO:0048568//embryonic organ development;GO:0048856//anatomical structure development;GO:0032501//multicellular organismal process;GO:0009888//tissue development;GO:0002009//morphogenesis of an epithelium;GO:0009887//organ morphogenesis;GO:0060429//epithelium development;GO:0060562//epithelial tube morphogenesis;GO:0072359//circulatory system devel…
Unigene0000309	10	11	0.969	0.4717	1.0043	0.5666	0.6845	0.9448	0.815	0.731966667	-0.155022109	0.896024352	1	no	-	--	-	-	-	-
Unigene0000310	21.66666667	8.333333333	1.6279	2.2554	0.1298	0.0976	0.9436	0.3419	1.3377	0.461033333	-1.536811637	0.117516281	1	no	-	Retrovirus-related Pol polyprotein LINE-1 [Larimichthys crocea]	-	-	-	-
Unigene0000311	16	24	1.5877	1.1241	0.748	1.1253	1.4275	1.745	1.153266667	1.4326	0.312909705	0.664395483	1	no	PEG10	PREDICTED: C-Jun-amino-terminal kinase-interacting protein 1-like [Cyprinus carpio]	-	-	-	-
Unigene0000312	1283.666667	1443.333333	10.0611	11.7209	9.3233	6.7989	10.4275	11.8347	10.36843333	9.687033333	-0.098071109	0.81477752	1	no	samhd1	PREDICTED: deoxynucleoside triphosphate triphosphohydrolase SAMHD1 isoform X1 [Sinocyclocheilus rhinocerous]	-	GO:0005622//intracellular;GO:0043227//membrane-bounded organelle;GO:0005623//cell;GO:0044424//intracellular part;GO:0043231//intracellular membrane-bounded organelle;GO:0043226//organelle;GO:0043229//intracellular organelle;GO:0044464//cell part	GO:0042578//phosphoric ester hydrolase activity;GO:0032560//guanyl deoxyribonucleotide binding;GO:0046872//metal ion binding;GO:0017076//purine nucleotide binding;GO:0097159//organic cyclic compound binding;GO:0016787//hydrolase activity;GO:0005488//binding;GO:0043167//ion binding;GO:0046914//transition metal ion binding;GO:0003676//nucleic acid binding;GO:1901265//nucleoside phosphate binding;GO…	GO:0009166//nucleotide catabolic process;GO:0046386//deoxyribose phosphate catabolic process;GO:1901564//organonitrogen compound metabolic process;GO:0019637//organophosphate metabolic process;GO:0072521//purine-containing compound metabolic process;GO:0046483//heterocycle metabolic process;GO:0009394//2'-deoxyribonucleotide metabolic process;GO:0006163//purine nucleotide metabolic process;GO:190…
Unigene0000313	10	18.33333333	0.8498	0.7584	0.5138	0.8282	0.5336	1.7676	0.707333333	1.043133333	0.560461419	0.451266317	1	no	-	--	-	-	-	-
Unigene0000314	8.666666667	17	0.6547	0.8112	0.0617	0.8816	0.6167	0.9749	0.5092	0.8244	0.695112086	0.393121864	1	no	-	--	-	-	-	-
Unigene0000315	2	13.33333333	0	0.2707	0.1441	1.2465	0.5238	0.488	0.138266667	0.752766667	2.444749352	0.018037533	1	no	-	--	-	-	-	-
Unigene0000316	22.66666667	28.33333333	1.8769	1.0151	1.8733	1.951	1.2441	1.6267	1.588433333	1.607266667	0.01700477	1	1	no	-	--	-	-	-	-
Unigene0000317	64.33333333	74.66666667	3.4211	2.6196	1.3546	2.9669	2.0276	2.0689	2.4651	2.354466667	-0.066245875	0.909045046	1	no	-	--	-	-	-	-
Unigene0000318	0	0	0	0	0	0	0	0	0.001	0.001	0	notest	notest	notest	-	--	-	-	-	-
Unigene0000319	48	64.66666667	1.7545	0.7721	0.9466	1.3678	1.2224	1.256	1.157733333	1.282066667	0.147168295	0.801040045	1	no	-	PREDICTED: ATP-binding cassette sub-family G member 2-like [Sinocyclocheilus rhinocerous]	-	-	-	-
Unigene0000320	22.33333333	14.33333333	1.4811	0.8906	0.5418	0.9849	0.2052	0.3058	0.971166667	0.498633333	-0.961739576	0.220949704	1	no	-	--	-	-	-	-
Unigene0000321	11.66666667	28.33333333	0.7728	0.7523	0.9466	1.205	0.9926	2.6303	0.8239	1.6093	0.965892146	0.155799397	1	no	TY3B-I	PREDICTED: adhesion G protein-coupled receptor E1-like [Danio rerio]	ko03013//RNA transport//Translation//Genetic Information Processing	-	-	-
Unigene0000322	57.33333333	62	0.9377	1.4574	0.4092	0.7823	0.7902	0.9495	0.934766667	0.840666667	-0.153072419	0.801398073	1	no	IFIT1	PREDICTED: interferon-induced protein with tetratricopeptide repeats 5-like [Cyprinus carpio]	-	-	-	-
Unigene0000323	14	13.33333333	0.8675	0.3974	0.8992	0.2785	0.5287	0.8757	0.721366667	0.560966667	-0.362817713	0.654510174	1	no	-	--	-	-	-	-
Unigene0000324	131.3333333	161.3333333	2.8458	2.1926	1.8458	2.8176	1.7103	2.3559	2.294733333	2.2946	-8.38E-05	1	1	no	FAM46A	PREDICTED: protein FAM46A-like [Sinocyclocheilus rhinocerous]	-	-	-	-
Unigene0000325	3871	4259.666667	35.935	37.0707	31.2055	34.5798	33.1217	27.3445	34.73706667	31.682	-0.132812521	0.72561389	1	no	stk3	PREDICTED: serine/threonine-protein kinase 3 [Sinocyclocheilus rhinocerous]	ko04010//MAPK signaling pathway//Signal transduction//Environmental Information Processing	GO:0044424//intracellular part;GO:0005622//intracellular;GO:0005623//cell;GO:0043226//organelle;GO:0043229//intracellular organelle;GO:0043227//membrane-bounded organelle;GO:0043231//intracellular membrane-bounded organelle;GO:0044464//cell part	GO:0016301//kinase activity;GO:0016773//phosphotransferase activity, alcohol group as acceptor;GO:0004672//protein kinase activity;GO:0005488//binding;GO:0001883//purine nucleoside binding;GO:0043169//cation binding;GO:0001882//nucleoside binding;GO:0032550//purine ribonucleoside binding;GO:1901363//heterocyclic compound binding;GO:0003824//catalytic activity;GO:0016740//transferase activity;GO:0…	GO:0012501//programmed cell death;GO:0008219//cell death;GO:0009987//cellular process;GO:0016265//death;GO:0051716//cellular response to stimulus;GO:0044699//single-organism process;GO:0006796//phosphate-containing compound metabolic process;GO:0023052//signaling;GO:0044237//cellular metabolic process;GO:0007154//cell communication;GO:0050789//regulation of biological process;GO:0044763//single-o…
Unigene0000326	13.33333333	16.33333333	1.031	0.3764	1.2022	0.5526	1.0319	1.0556	0.869866667	0.880033333	0.016763889	1	1	no	-	--	-	-	-	-
Unigene0000327	1.333333333	2.666666667	0.2696	0	0	0.3678	0.0635	0	0.089866667	0.143766667	0.67787122	0.749699306	1	no	-	--	-	-	-	-
Unigene0000328	1585.666667	1543.666667	8.6292	4.9332	8.6415	5.0737	5.759	6.8862	7.4013	5.9063	-0.325524057	0.440099509	1	no	Akna	PREDICTED: AT-hook-containing transcription factor-like isoform X2 [Sinocyclocheilus grahami]	-	-	-	-
Unigene0000329	60.66666667	93.66666667	1.3476	1.312	0.7372	2.1305	1.0226	1.1242	1.132266667	1.425766667	0.332524122	0.552391685	1	no	-	--	-	-	-	-
Unigene0000330	195.6666667	219	9.3167	7.4976	5.2177	7.9958	6.6171	5.7727	7.344	6.7952	-0.112050045	0.817600729	1	no	-	--	-	-	-	-
Unigene0000331	89.66666667	191.3333333	1.4628	1.0573	0.4479	2.3932	1.8162	1.0632	0.989333333	1.757533333	0.82902346	0.148006336	1	no	TC2N	PREDICTED: tandem C2 domains nuclear protein-like [Sinocyclocheilus rhinocerous]	-	-	-	-
Unigene0000332	5.666666667	14.33333333	0.6217	0.1816	0.2578	1.0179	0.8199	0.388	0.3537	0.741933333	1.06876334	0.209895615	1	no	-	--	-	-	-	-
Unigene0000333	78	112	0.8293	0.7154	0.9248	0.802	1.4041	0.7861	0.823166667	0.9974	0.27698764	0.600828773	1	no	Adgra1	PREDICTED: adhesion G protein-coupled receptor A1 [Danio rerio]	-	-	-	-
Unigene0000334	5.666666667	11.66666667	0.5944	0.2572	0.2738	0.6179	0.6843	0.6182	0.375133333	0.640133333	0.770968973	0.347893468	1	no	-	--	-	-	-	-
Unigene0000335	5581	3982	42.7256	20.359	70.0618	15.7782	17.3425	42.8887	44.38213333	25.33646667	-0.80876367	0.122224246	1	no	ttll6	PREDICTED: tubulin polyglutamylase ttll6-like [Sinocyclocheilus grahami]	-	GO:0005815//microtubule organizing center;GO:0043229//intracellular organelle;GO:0043232//intracellular non-membrane-bounded organelle;GO:0043226//organelle;GO:0005623//cell;GO:0044424//intracellular part;GO:0043228//non-membrane-bounded organelle;GO:0044422//organelle part;GO:0005622//intracellular;GO:0044446//intracellular organelle part;GO:0044430//cytoskeletal part;GO:0044464//cell part;GO:00…	GO:0070739//protein-glutamic acid ligase activity;GO:0016879//ligase activity, forming carbon-nitrogen bonds;GO:0008092//cytoskeletal protein binding;GO:0005488//binding;GO:0016874//ligase activity;GO:0005515//protein binding;GO:0016881//acid-amino acid ligase activity;GO:0003824//catalytic activity	GO:0018193//peptidyl-amino acid modification;GO:0001578//microtubule bundle formation;GO:0009987//cellular process;GO:0006996//organelle organization;GO:0000226//microtubule cytoskeleton organization;GO:0007017//microtubule-based process;GO:0044238//primary metabolic process;GO:0044763//single-organism cellular process;GO:0071840//cellular component organization or biogenesis;GO:0036211//protein …
Unigene0000336	7.333333333	24	0.2449	0.2781	0.3807	1.6862	0.346	0.3183	0.301233333	0.7835	1.379051853	0.095481944	1	no	-	--	-	-	-	-
Unigene0000337	24.66666667	38	1.2247	1.1923	1.3752	1.6312	1.9708	1.2738	1.264066667	1.625266667	0.362603896	0.542198685	1	no	-	--	-	-	-	-
Unigene0000338	208.3333333	282.6666667	4.1811	0.4717	4.1327	4.4255	1.3171	3.6393	2.9285	3.1273	0.094755728	0.892379843	1	no	prodh2	PREDICTED: probable proline dehydrogenase 2 [Sinocyclocheilus grahami]	ko01100//Metabolic pathways//Global and Overview//Metabolism;ko00330//Arginine and proline metabolism//Amino acid metabolism//Metabolism	-	GO:0016491//oxidoreductase activity;GO:0003824//catalytic activity;GO:0016645//oxidoreductase activity, acting on the CH-NH group of donors	GO:0044238//primary metabolic process;GO:0009987//cellular process;GO:0043648//dicarboxylic acid metabolic process;GO:0006560//proline metabolic process;GO:0071704//organic substance metabolic process;GO:1901605//alpha-amino acid metabolic process;GO:1901564//organonitrogen compound metabolic process;GO:0046483//heterocycle metabolic process;GO:0006807//nitrogen compound metabolic process;GO:0006…
Unigene0000339	5.333333333	5.666666667	0.4717	0.4593	0.1397	0.3678	0.4443	0.1577	0.3569	0.323266667	-0.142795148	1	1	no	-	--	-	-	-	-
Unigene0000340	12.66666667	12	0.7707	0.8186	1.0893	0.437	0.726	0.9291	0.892866667	0.697366667	-0.356527345	0.645565151	1	no	PCDHGB7	PREDICTED: protocadherin gamma-B7-like [Sinocyclocheilus anshuiensis]	-	GO:0016020//membrane	-	GO:0007155//cell adhesion;GO:0022610//biological adhesion
Unigene0000341	306	798.6666667	7.6215	2.3316	3.0225	15.3546	4.6311	7.1317	4.3252	9.039133333	1.063417609	0.065285842	1	no	-	PREDICTED: guanylate cyclase 2G-like [Sinocyclocheilus grahami]	-	-	-	-
Unigene0000342	12.66666667	30	1.9212	0.4676	0.2134	3.1026	0.7756	1.0704	0.8674	1.649533333	0.927288583	0.28898051	1	no	-	--	-	-	-	-
Unigene0000343	381.6666667	471.6666667	12.3001	14.0994	11.4808	13.6111	14.3577	10.987	12.62676667	12.98526667	0.040390386	0.927348645	1	no	-	--	-	-	-	-
Unigene0000344	71	66	0.6448	1.8527	0.8314	0.5763	1.3036	0.7729	1.109633333	0.884266667	-0.327529621	0.590992419	1	no	-	PREDICTED: RNA-directed DNA polymerase from mobile element jockey-like [Danio rerio]	-	-	-	-
Unigene0000345	8	15	0.2441	0.4159	0.8223	0.6661	0.6898	0.9044	0.4941	0.753433333	0.608676807	0.434564332	1	no	-	--	-	-	-	-
Unigene0000346	2192.333333	2974.666667	42.4721	48.5101	30.3246	32.9109	58.8767	46.9687	40.4356	46.2521	0.193892851	0.640598706	1	no	eed	PREDICTED: polycomb protein EED [Cyprinus carpio]	-	GO:0043231//intracellular membrane-bounded organelle;GO:0005623//cell;GO:0043226//organelle;GO:0044464//cell part;GO:0043227//membrane-bounded organelle;GO:0005622//intracellular;GO:0043229//intracellular organelle;GO:0044424//intracellular part	-	GO:0044238//primary metabolic process;GO:0034645//cellular macromolecule biosynthetic process;GO:0016070//RNA metabolic process;GO:0032774//RNA biosynthetic process;GO:0044249//cellular biosynthetic process;GO:0009987//cellular process;GO:1901360//organic cyclic compound metabolic process;GO:0016043//cellular component organization;GO:0034654//nucleobase-containing compound biosynthetic process;G…
Unigene0000347	7.666666667	14.66666667	0.2966	0.33	0.3514	1.0902	0.1197	0.2644	0.326	0.491433333	0.592123753	0.513500994	1	no	-	--	-	-	-	-
Unigene0000348	340	559.3333333	2.1907	2.2391	1.1211	2.8409	2.6449	2.1179	1.8503	2.534566667	0.453979909	0.324714891	1	no	grid2	PREDICTED: glutamate receptor ionotropic, delta-2 isoform X1 [Danio rerio]	ko04080//Neuroactive ligand-receptor interaction//Signaling molecules and interaction//Environmental Information Processing	-	-	-
Unigene0000349	24	26.66666667	0.2725	0.3367	0.1412	0.2288	0.3653	0.1226	0.250133333	0.2389	-0.066290473	0.95343619	1	no	ADGRD2	PREDICTED: adhesion G-protein coupled receptor D2-like [Sinocyclocheilus anshuiensis]	-	-	-	-
Unigene0000350	34.66666667	39.33333333	1.2903	2.0165	0.176	1.456	0.8316	0.98	1.160933333	1.0892	-0.09201624	0.912777468	1	no	-	--	-	-	-	-
Unigene0000351	14.33333333	26.66666667	0.8143	0.7173	0.1206	1.3907	0.8036	0.363	0.550733333	0.852433333	0.630233078	0.44160856	1	no	TRIM16	PREDICTED: tripartite motif-containing protein 16-like, partial [Sinocyclocheilus rhinocerous]	-	-	-	-
Unigene0000352	2.333333333	8	0.2968	0.0722	0.1538	0.2892	0.4193	0.7523	0.174266667	0.486933333	1.482427624	0.144769944	1	no	-	--	-	-	-	-
Unigene0000353	6	14.33333333	0.4013	0.7813	0.2496	1.0637	1.3607	0.5008	0.4774	0.975066667	1.030302295	0.217706064	1	no	-	--	-	-	-	-
Unigene0000354	16	16.33333333	1.8651	0.6537	1.0826	0.8725	0.6325	1.4548	1.200466667	0.9866	-0.283058152	0.692395386	1	no	-	--	-	-	-	-
Unigene0000355	10	6	0.8802	0.7011	0.8293	0.3743	0.3768	0.4369	0.803533333	0.396	-1.020857443	0.176409583	1	no	-	--	-	-	-	-
Unigene0000356	16.33333333	15	1.4677	0.7144	1.1063	0.8322	1.0054	0.6765	1.096133333	0.838033333	-0.387343764	0.568294859	1	no	-	PREDICTED: piggyBac transposable element-derived protein 4-like [Cyprinus carpio]	-	-	-	-
Unigene0000357	5	6.666666667	0.0734	0.5714	0.4563	0.6864	0.4146	0.1145	0.367033333	0.405166667	0.142604395	0.930008301	1	no	-	--	-	-	-	-
Unigene0000358	13	15	0.678	0.2475	0.7467	0.5616	0.5987	0.4297	0.5574	0.53	-0.072720643	0.959804707	1	no	-	--	-	-	-	-
Unigene0000359	36.33333333	24.66666667	2.3625	0.7263	3.8019	1.1148	1.2298	1.4548	2.2969	1.266466667	-0.858878942	0.208104875	1	no	-	--	-	-	-	-
Unigene0000360	581	549.6666667	37.2395	53.2098	49.7448	27.4689	38.3275	44.0094	46.73136667	36.60193333	-0.352471375	0.418600939	1	no	NDUFB1	PREDICTED: NADH dehydrogenase [ubiquinone] 1 beta subcomplex subunit 1 [Ictalurus punctatus]	ko01100//Metabolic pathways//Global and Overview//Metabolism;ko00190//Oxidative phosphorylation//Energy metabolism//Metabolism	GO:0044464//cell part;GO:0005623//cell;GO:0005622//intracellular;GO:0044424//intracellular part;GO:0043229//intracellular organelle;GO:0043226//organelle;GO:0043231//intracellular membrane-bounded organelle;GO:0043227//membrane-bounded organelle	-	GO:0008152//metabolic process;GO:0044710//single-organism metabolic process;GO:0044699//single-organism process
Unigene0000361	123.3333333	175.3333333	2.7192	1.4078	1.7106	2.3528	1.7618	2.636	1.945866667	2.2502	0.209640377	0.678161367	1	no	ric3	PREDICTED: protein RIC-3-like isoform X2 [Sinocyclocheilus anshuiensis]	-	-	-	-
Unigene0000362	18	28.66666667	1.0563	0.876	0.1622	1.159	0.737	0.8544	0.698166667	0.9168	0.393035566	0.603131914	1	no	-	--	-	-	-	-
Unigene0000363	14.66666667	23.33333333	0.9013	1.4175	0.7186	1.3513	1.1102	1.5143	1.012466667	1.325266667	0.388408273	0.556272284	1	no	-	hypothetical protein XENTR_v900217182mg, partial [Xenopus tropicalis]	-	-	-	-
Unigene0000364	16.33333333	17.33333333	0.8948	0.1742	1.1593	0.5232	0.4635	0.9073	0.742766667	0.631333333	-0.234507148	0.785389207	1	no	-	--	-	-	-	-
Unigene0000365	5	7.333333333	0.4801	0.1558	0.5805	0.6862	0.3768	0.3745	0.405466667	0.479166667	0.240944235	0.85069213	1	no	MYO7B	PREDICTED: unconventional myosin-VIIa isoform X1 [Danio rerio]	-	-	-	-
Unigene0000366	172.3333333	311	2.0878	1.1735	2.3536	1.9214	2.9093	3.5005	1.871633333	2.777066667	0.569263983	0.252709289	1	no	SLC12A1	PREDICTED: solute carrier family 12 member 1 [Scleropages formosus]	-	GO:0043226//organelle;GO:0031988//membrane-bounded vesicle;GO:0043227//membrane-bounded organelle;GO:0031982//vesicle;GO:0016020//membrane	GO:0005215//transporter activity;GO:0015291//secondary active transmembrane transporter activity;GO:0015294//solute:cation symporter activity;GO:0022892//substrate-specific transporter activity;GO:0008324//cation transmembrane transporter activity;GO:0015103//inorganic anion transmembrane transporter activity;GO:0022891//substrate-specific transmembrane transporter activity;GO:0015377//cation:chl…	GO:0051179//localization;GO:0006811//ion transport;GO:0044699//single-organism process;GO:0044765//single-organism transport;GO:0044763//single-organism cellular process;GO:0006812//cation transport;GO:0051234//establishment of localization;GO:0006820//anion transport;GO:0006821//chloride transport;GO:0009987//cellular process;GO:0030001//metal ion transport;GO:0006810//transport;GO:0015698//inor…
Unigene0000367	9	10.33333333	0.3134	1.2206	0.5685	1.2218	0.4428	0.3056	0.700833333	0.656733333	-0.093763712	1	1	no	-	novel immune-type receptor 1f, allele 2 [Danio rerio]	-	-	-	-
Unigene0000368	25.33333333	49.66666667	0.3376	0.2863	0.2032	0.5689	0.4616	0.3143	0.2757	0.448266667	0.701257957	0.228230559	1	no	Cdca4	PREDICTED: cell division cycle-associated protein 4-like isoform X1 [Sinocyclocheilus grahami]	-	-	-	-
Unigene0000369	3.333333333	7.333333333	0.3062	0.4471	0	0.8952	0.2163	0.2388	0.2511	0.4501	0.841983536	0.517864177	1	no	-	PREDICTED: cullin-9-like [Sinocyclocheilus rhinocerous]	-	-	-	-
Unigene0000370	3.666666667	3	0.2397	0.1167	0.3105	0.1401	0	0.2804	0.2223	0.140166667	-0.665364649	0.684572693	1	no	-	--	-	-	-	-
Unigene0000371	10.66666667	12.66666667	0.6178	0.3208	0.3842	0.2248	0.582	0.5141	0.440933333	0.4403	-0.002073701	1	1	no	-	--	-	-	-	-
Unigene0000372	2769	4455.333333	13.7604	15.6358	12.8098	17.6717	21.7807	17.2209	14.06866667	18.8911	0.425221104	0.264441094	1	no	PER2	PREDICTED: period circadian protein homolog 2-like isoform X1 [Pygocentrus nattereri]	-	-	-	-
Unigene0000373	14	14	1.337	0.6818	0.6599	0.7942	0.3598	0.9932	0.8929	0.715733333	-0.319076439	0.688701485	1	no	-	--	-	-	-	-
Unigene0000374	5149.666667	6726.333333	65.7908	50.0246	39.314	74.2191	56.5796	36.9163	51.7098	55.905	0.112539595	0.786772799	1	no	DEK	PREDICTED: protein DEK-like [Sinocyclocheilus grahami]	-	-	GO:0005488//binding;GO:0003676//nucleic acid binding;GO:0097159//organic cyclic compound binding;GO:1901363//heterocyclic compound binding	-
Unigene0000375	18	21.33333333	1.3883	0.6758	0.8302	0.8742	0.9556	0.9996	0.964766667	0.943133333	-0.032718319	1	1	no	-	--	-	-	-	-
Unigene0000376	4	6.666666667	0.697	0.1508	0.0803	0.3623	0.5106	0.4228	0.309366667	0.4319	0.481379557	0.690516201	1	no	-	--	-	-	-	-
Unigene0000377	21.66666667	27.66666667	1.1107	0.2911	1.4168	0.8992	0.8047	1.1995	0.939533333	0.9678	0.042764592	0.953133262	1	no	-	PREDICTED: neuron navigator 3-like [Poecilia mexicana]	-	-	-	-
Unigene0000378	123	225.6666667	1.7476	1.4989	0.5714	2.4331	1.5873	1.7446	1.272633333	1.921666667	0.594541292	0.269285946	1	no	nrarpb	PREDICTED: notch-regulated ankyrin repeat-containing protein B isoform X1 [Danio rerio]	-	-	-	-
Unigene0000379	10.66666667	7.666666667	0.9389	0	0.3244	0.122	0.2948	0.3357	0.4211	0.250833333	-0.747433794	0.50765031	1	no	-	--	-	-	-	-
Unigene0000380	233.6666667	140.6666667	4.1502	3.1898	5.528	1.3766	1.4059	3.4502	4.289333333	2.077566667	-1.045858663	0.051329117	1	no	Rasd1	dexamethasone-induced Ras-related protein 1 [Danio rerio]	-	-	GO:0036094//small molecule binding;GO:0005488//binding	GO:0019693//ribose phosphate metabolic process;GO:0035556//intracellular signal transduction;GO:0006793//phosphorus metabolic process;GO:0009987//cellular process;GO:0006163//purine nucleotide metabolic process;GO:0071704//organic substance metabolic process;GO:0009117//nucleotide metabolic process;GO:0051716//cellular response to stimulus;GO:0046483//heterocycle metabolic process;GO:0034641//cel…
Unigene0000381	8848.333333	5637.666667	418.3794	230.8398	757.8573	143.3998	176.3995	399.6058	469.0255	239.8017	-0.967824475	0.060706394	1	no	DYNLRB2	PREDICTED: dynein light chain roadblock-type 2 [Astyanax mexicanus]	-	-	-	-
Unigene0000382	12	12.33333333	0.3159	0.6664	0.9278	0.3695	0.5456	0.6982	0.6367	0.537766667	-0.243633431	0.781838219	1	no	-	--	-	-	-	-
Unigene0000383	23	13.33333333	1.1374	1.1864	3.3682	0.8234	0.3061	1.4575	1.897333333	0.862333333	-1.137655608	0.140041214	1	no	-	--	-	-	-	-
Unigene0000384	258	295.3333333	2.872	3.4061	1.7752	3.436	2.0953	2.0447	2.684433333	2.525333333	-0.088143747	0.858312689	1	no	eif3a	PREDICTED: protein LIAT1 [Pseudopodoces humilis]	-	-	-	-
Unigene0000385	106.6666667	221.3333333	3.218	1.1974	0.9779	5.0177	2.2852	1.8136	1.797766667	3.038833333	0.757311767	0.212165447	1	no	foxa2	PREDICTED: hepatocyte nuclear factor 3-beta [Sinocyclocheilus rhinocerous]	-	-	-	-
Unigene0000386	1481.333333	1523	3.697	4.5638	8.338	4.7702	3.6146	5.4098	5.532933333	4.5982	-0.266975323	0.550984018	1	no	IGSF3	PREDICTED: immunoglobulin superfamily member 3-like [Sinocyclocheilus rhinocerous]	-	-	-	-
Unigene0000387	19.66666667	25.33333333	0.9293	0.769	1.0595	0.797	1.4881	0.7249	0.919266667	1.003333333	0.126245653	0.861864436	1	no	pol	Pro-Pol polyprotein [Larimichthys crocea]	-	-	-	-
Unigene0000388	172	304	0.7666	2.897	0.5297	3.3997	1.5451	1.1831	1.397766667	2.042633333	0.547306706	0.406973786	1	no	Rasa4	PREDICTED: ras GTPase-activating protein 4-like isoform X1 [Sinocyclocheilus anshuiensis]	-	-	-	-
Unigene0000389	7	6.666666667	0.3191	0.8543	0.4961	0.4354	0.4508	0.4356	0.5565	0.4406	-0.336912193	0.715908516	1	no	FRRS1	si:dkey-251i10.2 precursor [Danio rerio]	-	-	-	-
Unigene0000390	13	9	1.4467	0.2167	0.519	0.6941	0.4717	0.0868	0.727466667	0.417533333	-0.800989765	0.409631519	1	no	-	PREDICTED: contactin-3-like [Sinocyclocheilus anshuiensis]	-	-	-	-
Unigene0000391	1445.333333	1543	18.7692	13.1665	31.4647	11.5465	16.4271	27.0153	21.13346667	18.32963333	-0.205351515	0.668388113	1	no	cyhr1	PREDICTED: cysteine and histidine-rich protein 1 [Sinocyclocheilus rhinocerous]	-	GO:0005623//cell;GO:0005622//intracellular;GO:0044424//intracellular part;GO:0044464//cell part	GO:0046872//metal ion binding;GO:0005488//binding;GO:0043169//cation binding;GO:0043167//ion binding;GO:0046914//transition metal ion binding	GO:0070647//protein modification by small protein conjugation or removal;GO:0043412//macromolecule modification;GO:0008152//metabolic process;GO:0044260//cellular macromolecule metabolic process;GO:0009987//cellular process;GO:0019538//protein metabolic process;GO:0043170//macromolecule metabolic process;GO:0071704//organic substance metabolic process;GO:0044237//cellular metabolic process;GO:004…
Unigene0000392	617	369.3333333	13.894	7.3312	6.8628	3.532	3.8105	6.4056	9.362666667	4.5827	-1.030721651	0.032746186	1	no	fsta	PREDICTED: follistatin-A-like [Sinocyclocheilus rhinocerous]	ko04350//TGF-beta signaling pathway//Signal transduction//Environmental Information Processing	-	-	-
Unigene0000393	252.3333333	413.6666667	2.1115	2.4278	2.3678	2.5048	3.3005	3.5709	2.302366667	3.1254	0.440923233	0.320265658	1	no	Pacs1	PREDICTED: phosphofurin acidic cluster sorting protein 2-like isoform X2 [Sinocyclocheilus anshuiensis]	-	-	-	-
Unigene0000394	4.666666667	6	0.4464	0.2173	0.3855	0.58	0	0.4642	0.349733333	0.348066667	-0.006891649	1	1	no	-	--	-	-	-	-
Unigene0000395	17	13.66666667	0.7529	0.6037	0.9181	0.3453	0.7926	0.4146	0.758233333	0.5175	-0.551083019	0.42161009	1	no	-	--	-	-	-	-
Unigene0000396	713.3333333	1289.333333	4.8401	7.2641	3.4912	8.6659	8.6283	6.277	5.198466667	7.857066667	0.595904651	0.179274884	1	no	MAPT	PREDICTED: microtubule-associated protein tau-like isoform X3 [Sinocyclocheilus anshuiensis]	ko04010//MAPK signaling pathway//Signal transduction//Environmental Information Processing	-	-	-
Unigene0000397	34	32.33333333	2.019	1.6766	2.4004	0.8796	1.5102	2.3623	2.032	1.584033333	-0.359297707	0.574334252	1	no	-	--	-	-	-	-
Unigene0000398	5.666666667	10	0.2096	0.4762	0.507	0.8717	0.0658	0.7086	0.3976	0.5487	0.464699819	0.668885736	1	no	-	--	-	-	-	-
Unigene0000399	12.33333333	12	1.4751	0.7833	0.2085	1.2546	0.4421	0.2615	0.8223	0.652733333	-0.333171113	0.741543768	1	no	-	--	-	-	-	-
Unigene0000400	925	962	8.9872	8.0977	14.7018	9.7669	7.3857	9.6567	10.59556667	8.936433333	-0.245689697	0.572585433	1	no	TMEM104	PREDICTED: transmembrane protein 104-like [Sinocyclocheilus grahami]	-	GO:0044425//membrane part;GO:0016020//membrane;GO:0031224//intrinsic component of membrane	-	-
Unigene0000401	32.66666667	40.33333333	1.2493	2.1892	1.4502	1.4805	1.7886	1.754	1.629566667	1.674366667	0.039127121	0.961901038	1	no	-	--	-	-	-	-
Unigene0000402	14.66666667	23.33333333	0.3994	0.2991	0.6688	0.503	0.2605	0.9586	0.455766667	0.574033333	0.3328391	0.651341531	1	no	-	--	-	-	-	-
Unigene0000403	1491.333333	1717	12.3811	14.6929	10.6881	10.9432	13.7781	11.5744	12.58736667	12.09856667	-0.057140357	0.887037482	1	no	Fnta	protein farnesyltransferase/geranylgeranyltransferase type-1 subunit alpha [Danio rerio]	ko01130//Biosynthesis of antibiotics//Global and Overview//Metabolism;ko00900//Terpenoid backbone biosynthesis//Metabolism of terpenoids and polyketides//Metabolism	-	GO:0003824//catalytic activity;GO:0016740//transferase activity;GO:0016765//transferase activity, transferring alkyl or aryl (other than methyl) groups;GO:0004659//prenyltransferase activity	-
Unigene0000404	82	82	2.2504	1.6665	0.7974	1.6795	1.1595	1.0502	1.571433333	1.2964	-0.277570143	0.627002758	1	no	-	--	-	-	-	-
Unigene0000405	2873.666667	2778	32.2138	21.5605	37.7549	15.0328	19.0052	37.6786	30.50973333	23.90553333	-0.351924978	0.439416444	1	no	b3gnt5a	PREDICTED: lactosylceramide 1,3-N-acetyl-beta-D-glucosaminyltransferase [Cyprinus carpio]	ko01100//Metabolic pathways//Global and Overview//Metabolism;ko00601//Glycosphingolipid biosynthesis - lacto and neolacto series//Glycan biosynthesis and metabolism//Metabolism	GO:0044424//intracellular part;GO:0043227//membrane-bounded organelle;GO:0044425//membrane part;GO:0005623//cell;GO:0044446//intracellular organelle part;GO:0005737//cytoplasm;GO:0016020//membrane;GO:0043226//organelle;GO:0012505//endomembrane system;GO:0044444//cytoplasmic part;GO:0043231//intracellular membrane-bounded organelle;GO:0044422//organelle part;GO:0005794//Golgi apparatus;GO:0044464/…	GO:0003824//catalytic activity;GO:0008194//UDP-glycosyltransferase activity;GO:0016758//transferase activity, transferring hexosyl groups;GO:0008375//acetylglucosaminyltransferase activity;GO:0016740//transferase activity;GO:0016757//transferase activity, transferring glycosyl groups	GO:0044237//cellular metabolic process;GO:0009987//cellular process;GO:0006464//cellular protein modification process;GO:0043170//macromolecule metabolic process;GO:0019538//protein metabolic process;GO:0071704//organic substance metabolic process;GO:0044238//primary metabolic process;GO:0043412//macromolecule modification;GO:0008152//metabolic process;GO:0036211//protein modification process;GO:…
Unigene0000406	1276	1444	12.8866	9.3273	13.8712	8.864	12.0677	12.7839	12.02836667	11.23853333	-0.097986981	0.813515487	1	no	e4f1	PREDICTED: transcription factor E4F1 isoform X2 [Sinocyclocheilus rhinocerous]	-	GO:0005634//nucleus;GO:0070013//intracellular organelle lumen;GO:0043226//organelle;GO:0043227//membrane-bounded organelle;GO:0005622//intracellular;GO:0043229//intracellular organelle;GO:0044464//cell part;GO:0044422//organelle part;GO:0044424//intracellular part;GO:0031974//membrane-enclosed lumen;GO:0043233//organelle lumen;GO:0031981//nuclear lumen;GO:0005623//cell;GO:0044428//nuclear part;GO…	GO:0003824//catalytic activity;GO:1901363//heterocyclic compound binding;GO:0097159//organic cyclic compound binding;GO:0005488//binding;GO:0003676//nucleic acid binding	GO:0044238//primary metabolic process;GO:0018130//heterocycle biosynthetic process;GO:0034654//nucleobase-containing compound biosynthetic process;GO:0044267//cellular protein metabolic process;GO:0032446//protein modification by small protein conjugation;GO:0044237//cellular metabolic process;GO:0043412//macromolecule modification;GO:0044271//cellular nitrogen compound biosynthetic process;GO:00…
Unigene0000407	5.333333333	9.333333333	0.4815	0.4018	0.2139	0.3218	0.7128	0.5902	0.365733333	0.5416	0.566435617	0.550825524	1	no	-	--	-	-	-	-
Unigene0000408	4.333333333	4.333333333	0.5222	0.1453	0.3093	0.0582	0.6325	0.1746	0.3256	0.288433333	-0.174862798	1	1	no	-	--	-	-	-	-
Unigene0000409	568	848.6666667	5.4378	5.0503	2.8059	5.8743	6.6697	4.1378	4.431333333	5.5606	0.327499708	0.468790365	1	no	DACH2	PREDICTED: dachshund homolog 2-like isoform X1 [Cyprinus carpio]	-	GO:0043229//intracellular organelle;GO:0044464//cell part;GO:0043227//membrane-bounded organelle;GO:0044424//intracellular part;GO:0005622//intracellular;GO:0005623//cell;GO:0043231//intracellular membrane-bounded organelle;GO:0043226//organelle	-	GO:0044707//single-multicellular organism process;GO:0044767//single-organism developmental process;GO:0007275//multicellular organism development;GO:0048856//anatomical structure development;GO:0048731//system development;GO:0032501//multicellular organismal process;GO:0044699//single-organism process;GO:0031016//pancreas development;GO:0048513//animal organ development;GO:0032502//developmental…
Unigene0000410	26.66666667	38.66666667	0.9842	1.2631	1.3447	1.0813	1.2642	1.9193	1.197333333	1.4216	0.247690737	0.673627605	1	no	-	--	-	-	-	-
Unigene0000411	9.333333333	14.33333333	0.4636	0.3949	0.7809	0.5874	0.6005	0.8589	0.546466667	0.682266667	0.320202235	0.671218995	1	no	-	--	-	-	-	-
Unigene0000412	3361.666667	4415.333333	29.7135	35.2504	29.776	26.5827	40.5939	36.7567	31.57996667	34.64443333	0.13361391	0.730647481	1	no	ankrd13c	PREDICTED: ankyrin repeat domain-containing protein 13C [Sinocyclocheilus anshuiensis]	-	GO:0043226//organelle;GO:0043231//intracellular membrane-bounded organelle;GO:0043229//intracellular organelle;GO:0044424//intracellular part;GO:0044464//cell part;GO:0042175//nuclear outer membrane-endoplasmic reticulum membrane network;GO:0016020//membrane;GO:0005622//intracellular;GO:0005623//cell;GO:0043227//membrane-bounded organelle;GO:0012505//endomembrane system	-	-
Unigene0000413	19	45.33333333	0.4887	0.7929	0.574	0.8381	1.5649	1.3213	0.618533333	1.241433333	1.005083538	0.097707627	1	no	FRAS1	PREDICTED: extracellular matrix protein FRAS1-like [Sinocyclocheilus rhinocerous]	-	-	-	GO:0009790//embryo development;GO:0048598//embryonic morphogenesis;GO:0009987//cellular process;GO:0043062//extracellular structure organization;GO:0048736//appendage development;GO:0032501//multicellular organismal process;GO:0044707//single-multicellular organism process;GO:0016043//cellular component organization;GO:0030198//extracellular matrix organization;GO:0033333//fin development;GO:0009…
Unigene0000414	21.33333333	26.66666667	1.3984	0.5363	0.7906	1.6188	0.6786	0.4628	0.908433333	0.920066667	0.018357756	1	1	no	-	--	-	-	-	-
Unigene0000415	22.66666667	19.66666667	0.6751	0.7584	2.153	0.6073	0.2935	1.5393	1.1955	0.813366667	-0.555636357	0.486837235	1	no	-	PREDICTED: protocadherin Fat 2-like [Sinocyclocheilus grahami]	-	-	-	-
Unigene0000416	50.33333333	59	0.7502	0.7644	1.1393	1.2514	0.8381	0.4627	0.884633333	0.850733333	-0.056372622	0.926094179	1	no	-	--	-	-	-	-
Unigene0000417	11.66666667	9	1.2136	0.7645	0.5179	0.5566	0.4035	0.6125	0.832	0.5242	-0.666466175	0.386669495	1	no	-	--	-	-	-	-
Unigene0000418	24.33333333	27.33333333	1.4549	0.2897	0.6854	0.9796	0.3114	0.8769	0.81	0.722633333	-0.164658104	0.852369505	1	no	Gtf2ird2	general transcription factor II-I repeat domain-containing protein 2B-like [Alligator mississippiensis]	-	-	-	-
Unigene0000419	23.33333333	27.33333333	0.9307	0.7928	1.0048	0.6651	0.8036	1.1494	0.909433333	0.8727	-0.059482087	0.947696057	1	no	-	--	-	-	-	-
Unigene0000420	1085.666667	1345	12.9437	14.5329	11.4586	15.6635	12.6423	11.476	12.9784	13.2606	0.031033518	0.93995474	1	no	ZDHHC6	PREDICTED: palmitoyltransferase ZDHHC6 [Sinocyclocheilus grahami]	-	GO:0016020//membrane;GO:0031224//intrinsic component of membrane;GO:0044425//membrane part	GO:0016740//transferase activity;GO:0046914//transition metal ion binding;GO:0005488//binding;GO:0003824//catalytic activity;GO:0016746//transferase activity, transferring acyl groups;GO:0043169//cation binding;GO:0016409//palmitoyltransferase activity;GO:0016747//transferase activity, transferring acyl groups other than amino-acyl groups;GO:0046872//metal ion binding;GO:0043167//ion binding	-
Unigene0000421	6	17.66666667	0.6061	0.118	0.3769	0.8033	1.1988	0.7091	0.367	0.903733333	1.300117073	0.097932089	1	no	-	--	-	-	-	-
Unigene0000422	631	903.3333333	12.7877	11.3338	10.3696	14.9334	13.9641	11.9469	11.49703333	13.6148	0.24391415	0.556287193	1	no	BMS1	ribosome biogenesis protein BMS1 homolog [Danio rerio]	ko03008//Ribosome biogenesis in eukaryotes//Translation//Genetic Information Processing	GO:0044424//intracellular part;GO:0005622//intracellular;GO:0043227//membrane-bounded organelle;GO:0043226//organelle;GO:0005623//cell;GO:0044464//cell part;GO:0043231//intracellular membrane-bounded organelle;GO:0043229//intracellular organelle	GO:0001883//purine nucleoside binding;GO:0003824//catalytic activity;GO:0005488//binding;GO:1901363//heterocyclic compound binding;GO:0032550//purine ribonucleoside binding;GO:0016818//hydrolase activity, acting on acid anhydrides, in phosphorus-containing anhydrides;GO:0032549//ribonucleoside binding;GO:0016462//pyrophosphatase activity;GO:0097159//organic cyclic compound binding;GO:0036094//sma…	GO:0044085//cellular component biogenesis;GO:0022613//ribonucleoprotein complex biogenesis;GO:0044767//single-organism developmental process;GO:0071840//cellular component organization or biogenesis;GO:0044699//single-organism process;GO:0042254//ribosome biogenesis;GO:0032502//developmental process
Unigene0000423	8	8	0.7025	0.8207	0.1456	0.4382	0.5955	0.3836	0.556266667	0.472433333	-0.235665897	0.823010588	1	no	-	--	-	-	-	-
Unigene0000424	1084.333333	1323	6.4263	5.3487	7.4143	5.9381	6.3403	6.9609	6.396433333	6.4131	0.003754224	0.993373116	1	no	FBXO30	PREDICTED: F-box only protein 30-like [Sinocyclocheilus rhinocerous]	-	-	GO:0043169//cation binding;GO:0016740//transferase activity;GO:0043167//ion binding;GO:0005488//binding;GO:0003824//catalytic activity;GO:0046914//transition metal ion binding;GO:0046872//metal ion binding;GO:0019787//ubiquitin-like protein transferase activity	GO:0070647//protein modification by small protein conjugation or removal;GO:0044260//cellular macromolecule metabolic process;GO:0043412//macromolecule modification;GO:0044237//cellular metabolic process;GO:0044238//primary metabolic process;GO:0044267//cellular protein metabolic process;GO:0019538//protein metabolic process;GO:0009987//cellular process;GO:0043170//macromolecule metabolic process…
Unigene0000425	11	18.33333333	0.8149	0.7273	0.7039	0.0529	1.855	1.3243	0.7487	1.0774	0.525094311	0.568226986	1	no	VWA1	PREDICTED: von Willebrand factor A domain-containing protein 1 [Ictalurus punctatus]	-	-	-	-
Unigene0000426	845.3333333	1264.666667	6.4783	6.5681	4.8422	6.8609	7.9367	7.4477	5.962866667	7.4151	0.314460071	0.44265244	1	no	Wdr6	PREDICTED: WD repeat-containing protein 6-like [Sinocyclocheilus rhinocerous]	-	-	-	-
Unigene0000427	0	0	0	0	0	0	0	0	0.001	0.001	0	notest	notest	notest	-	--	-	-	-	-
Unigene0000428	36.33333333	60	0.3379	1.6953	0.7812	1.8237	1.983	0.1825	0.938133333	1.329733333	0.503272067	0.540641118	1	no	-	--	-	-	-	-
Unigene0000429	125.3333333	212.3333333	0.127	11.501	0	13.6667	1.2264	1.0899	3.876	5.327666667	0.45893525	0.746026344	1	no	-	PREDICTED: sorting nexin-10A-like [Cyprinus carpio]	-	-	-	-
Unigene0000430	2628.666667	3169	23.2525	22.8036	18.0061	22.6115	20.7929	20.3863	21.35406667	21.26356667	-0.006127234	0.987579298	1	no	PISD	PREDICTED: phosphatidylserine decarboxylase proenzyme, mitochondrial isoform X4 [Sinocyclocheilus grahami]	ko01100//Metabolic pathways//Global and Overview//Metabolism;ko01110//Biosynthesis of secondary metabolites//Global and Overview//Metabolism;ko00564//Glycerophospholipid metabolism//Lipid metabolism//Metabolism	-	GO:0016829//lyase activity;GO:0016831//carboxy-lyase activity;GO:0003824//catalytic activity;GO:0016830//carbon-carbon lyase activity	GO:0008152//metabolic process;GO:0044710//single-organism metabolic process;GO:0044699//single-organism process;GO:0044763//single-organism cellular process;GO:0006793//phosphorus metabolic process;GO:0044255//cellular lipid metabolic process;GO:0019637//organophosphate metabolic process;GO:0006629//lipid metabolic process;GO:0006796//phosphate-containing compound metabolic process;GO:0044237//ce…
Unigene0000431	1421	2273.333333	22.4305	33.0636	9.667	50.7561	17.6429	16.6184	21.72036667	28.33913333	0.383747181	0.485009046	1	no	Tpm4	PREDICTED: tropomyosin alpha-4 chain isoform X3 [Sinocyclocheilus grahami]	ko04261//Adrenergic signaling in cardiomyocytes//Circulatory system//Organismal Systems;ko04260//Cardiac muscle contraction//Circulatory system//Organismal Systems	-	-	GO:0044699//single-organism process;GO:0030036//actin cytoskeleton organization;GO:0032501//multicellular organismal process;GO:0007010//cytoskeleton organization;GO:0006996//organelle organization;GO:1902589//single-organism organelle organization;GO:0048468//cell development;GO:0070925//organelle assembly;GO:0022607//cellular component assembly;GO:0055001//muscle cell development;GO:0044085//ce…
Unigene0000432	13678.66667	19761.66667	119.5741	136.615	96.7169	101.4512	178.7791	148.485	117.6353333	142.9051	0.280735946	0.474906495	1	no	mcm4	PREDICTED: DNA replication licensing factor mcm4 [Sinocyclocheilus rhinocerous]	ko04110//Cell cycle//Cell growth and death//Cellular Processes;ko03030//DNA replication//Replication and repair//Genetic Information Processing	GO:0032991//macromolecular complex;GO:0043234//protein complex	GO:0016787//hydrolase activity;GO:0032549//ribonucleoside binding;GO:0005488//binding;GO:0001882//nucleoside binding;GO:1901363//heterocyclic compound binding;GO:0032550//purine ribonucleoside binding;GO:0097159//organic cyclic compound binding;GO:0001883//purine nucleoside binding;GO:0016818//hydrolase activity, acting on acid anhydrides, in phosphorus-containing anhydrides;GO:0003676//nucleic a…	GO:0051704//multi-organism process;GO:0050896//response to stimulus;GO:0006996//organelle organization;GO:0009607//response to biotic stimulus;GO:0051707//response to other organism;GO:0032392//DNA geometric change;GO:0016043//cellular component organization;GO:0009620//response to fungus;GO:0051276//chromosome organization;GO:0009987//cellular process;GO:0043207//response to external biotic stim…
Unigene0000433	7.666666667	16.33333333	0.3589	0.6988	0.5951	0.7834	0.2704	1.7356	0.550933333	0.9298	0.755042672	0.355377736	1	no	-	PREDICTED: trichohyalin-like isoform X1 [Sinocyclocheilus grahami]	-	-	-	-
Unigene0000434	486.6666667	836	4.8137	4.9161	4.06	5.107	8.0193	6.7145	4.5966	6.6136	0.524868665	0.217575154	1	no	ATXN7L2	PREDICTED: ataxin-7-like protein 2 [Sinocyclocheilus anshuiensis]	-	-	-	-
Unigene0000435	0.666666667	0.333333333	0	0	0.1433	0	0.0651	0	0.047766667	0.0217	-1.138309161	1	1	no	-	--	-	-	-	-
Unigene0000436	8.333333333	18	0.439	0.7835	0.6067	0.9126	1.3094	1.0843	0.609733333	1.1021	0.85400481	0.22987971	1	no	-	--	-	-	-	-
Unigene0000437	52.66666667	65.66666667	2.2028	3.6906	2.177	3.1552	2.8469	2.3576	2.690133333	2.786566667	0.050810989	0.93868754	1	no	-	--	-	-	-	-
Unigene0000438	22.66666667	50.66666667	0.78	0.8914	0.6327	1.3484	0.7666	2.0368	0.768033333	1.383933333	0.849533616	0.167793296	1	no	Slc12a5	PREDICTED: solute carrier family 12 member 5-like [Sinocyclocheilus rhinocerous]	-	-	-	-
Unigene0000439	386.6666667	321.3333333	28.4695	38.7139	21.0432	22.9693	19.9863	17.8606	29.40886667	20.27206667	-0.536758014	0.239587392	1	no	-	--	-	-	-	-
Unigene0000440	309.3333333	321.6666667	3.5774	2.9837	3.1766	2.4873	2.8573	3.0189	3.2459	2.787833333	-0.21947424	0.617796243	1	no	-	PREDICTED: uncharacterized protein LOC107572457 [Sinocyclocheilus grahami]	-	-	-	-
Unigene0000441	1861	2139.666667	15.2715	16.1533	13.29	11.1574	16.2317	15.4706	14.90493333	14.28656667	-0.061130671	0.878112865	1	no	GABPA	PREDICTED: GA-binding protein alpha chain-like isoform X1 [Sinocyclocheilus grahami]	-	-	-	-
Unigene0000442	88.66666667	74.33333333	2.3438	1.9522	2.6722	1.2994	1.7171	1.8079	2.322733333	1.608133333	-0.530436504	0.302036208	1	no	-	PREDICTED: zinc finger MYM-type protein 4-like [Cyprinus carpio]	-	-	-	-
Unigene0000443	8.333333333	13.66666667	0.3933	0.7021	0.5436	1.0222	0.3087	0.8182	0.546333333	0.716366667	0.39091676	0.615110128	1	no	-	--	-	-	-	-
Unigene0000444	153.6666667	283.3333333	1.4418	2.2682	1.0829	4.0564	1.9091	1.2876	1.597633333	2.4177	0.5976989	0.280095126	1	no	-	--	-	-	-	-
Unigene0000445	15	18.33333333	1.0575	0.4212	0.6975	0.4872	0.6791	1.0123	0.7254	0.7262	0.001590185	1	1	no	-	--	-	-	-	-
Unigene0000446	16	33.66666667	1.2105	0.8485	0.2509	2.1894	1.1858	0.642	0.769966667	1.339066667	0.798359893	0.273808756	1	no	-	--	-	-	-	-
Unigene0000447	175.6666667	247	1.4688	2.0199	1.3416	1.4815	2.2223	1.9835	1.6101	1.895766667	0.235631113	0.621273148	1	no	LOXL3	PREDICTED: lysyl oxidase homolog 3-like isoform X1 [Sinocyclocheilus rhinocerous]	-	-	GO:0046914//transition metal ion binding;GO:0043169//cation binding;GO:0038024//cargo receptor activity;GO:0046872//metal ion binding;GO:0005488//binding;GO:0060089//molecular transducer activity;GO:0043167//ion binding;GO:0004872//receptor activity	GO:0044699//single-organism process;GO:0008152//metabolic process;GO:0044710//single-organism metabolic process
Unigene0000448	16.33333333	15.33333333	0.711	0.1384	0.9212	0.2494	0.8037	0.3605	0.5902	0.4712	-0.324864382	0.701840562	1	no	-	--	-	-	-	-
Unigene0000449	24	30	1.7878	0.4453	0.7757	1.3939	1.0574	0.6486	1.002933333	1.0333	0.043033465	0.957123769	1	no	-	--	-	-	-	-
Unigene0000450	18.66666667	11.66666667	2.2132	0.1436	1.8352	0.6327	0.2085	1.2084	1.397333333	0.6832	-1.032296336	0.260809336	1	no	-	--	-	-	-	-
Unigene0000451	983.3333333	945.6666667	66.1018	82.0938	69.6601	54.3535	52.6038	65.3138	72.61856667	57.4237	-0.338692164	0.408151252	1	no	MP68	PREDICTED: 6.8 kDa mitochondrial proteolipid [Sinocyclocheilus anshuiensis]	-	GO:0044464//cell part;GO:0005623//cell;GO:0044424//intracellular part;GO:0043227//membrane-bounded organelle;GO:0005622//intracellular;GO:0043231//intracellular membrane-bounded organelle;GO:0043229//intracellular organelle;GO:0043226//organelle	-	-
Unigene0000452	15	20.33333333	1.3527	1.109	0.7379	2.3868	0.6706	0.4443	1.066533333	1.167233333	0.130163933	0.880552398	1	no	-	--	-	-	-	-
Unigene0000453	55.66666667	46.66666667	2.4958	0.544	3.2818	0.726	1.193	2.3535	2.1072	1.424166667	-0.56520926	0.429035945	1	no	-	--	-	-	-	-
Unigene0000454	279	315.6666667	17.9227	24.9368	17.8244	11.9932	23.785	21.9039	20.22796667	19.22736667	-0.073190118	0.880390094	1	no	-	--	-	-	-	-
Unigene0000455	298	293	2.1866	1.4098	2.9417	1.3209	1.705	2.2308	2.179366667	1.752233333	-0.314714041	0.513842883	1	no	RNF157	PREDICTED: RING finger protein 157-like isoform X1 [Sinocyclocheilus anshuiensis]	-	-	GO:0043169//cation binding;GO:0043167//ion binding;GO:0005488//binding	-
Unigene0000456	3	11	0	0.2057	0.4381	0.659	0.9289	0.3846	0.2146	0.6575	1.615340818	0.100831282	1	no	-	--	-	-	-	-
Unigene0000457	16	21.33333333	0.6325	0.2309	1.0653	0.3698	0.5957	1.11	0.6429	0.691833333	0.105830175	0.88596695	1	no	-	--	-	-	-	-
Unigene0000458	9.333333333	20	0.7825	0.4102	0.4991	1.0324	1.1906	0.7982	0.563933333	1.007066667	0.836562665	0.227603201	1	no	-	--	-	-	-	-
Unigene0000459	1171.666667	1457.666667	9.8051	10.3573	10.1183	9.5404	11.7368	10.0478	10.09356667	10.44166667	0.048915953	0.902873927	1	no	cdc37l1	PREDICTED: hsp90 co-chaperone Cdc37-like 1 isoform X3 [Sinocyclocheilus anshuiensis]	-	GO:0044464//cell part;GO:0005623//cell;GO:0005622//intracellular;GO:0044424//intracellular part	-	-
Unigene0000460	70.66666667	74.66666667	2.5397	7.9826	4.8134	6.4492	2.5972	4.0751	5.1119	4.373833333	-0.224961367	0.709977435	1	no	-	--	-	-	-	-
Unigene0000461	1.666666667	5.333333333	0	0	0.5994	0.7213	0.7626	0.0902	0.1998	0.5247	1.392936207	0.392941486	1	no	-	--	-	-	-	-
Unigene0000462	4.666666667	12.66666667	0.2951	0.6464	0.0765	1.3804	0.4864	0.4028	0.339333333	0.756533333	1.156700494	0.214589645	1	no	-	--	-	-	-	-
Unigene0000463	23.66666667	44	1.009	0.9413	1.0458	1.2455	2.3759	1.1149	0.9987	1.578766667	0.660674688	0.270405922	1	no	gata3	PREDICTED: trans-acting T-cell-specific transcription factor GATA-3 isoform X5 [Sinocyclocheilus grahami]	-	-	-	-
Unigene0000464	2.333333333	2.666666667	0.1152	0.2803	0	0.0898	0.1627	0.1347	0.131833333	0.129066667	-0.030598742	1	1	no	-	--	-	-	-	-
Unigene0000465	12.33333333	13	0.5222	0.6537	1.6239	0.9306	0.773	0.6983	0.933266667	0.800633333	-0.221147686	0.788232413	1	no	-	--	-	-	-	-
Unigene0000466	22.33333333	55.33333333	0.4562	1.1233	0.1947	1.2762	1.289	1.1303	0.5914	1.231833333	1.058600924	0.115730519	1	no	-	--	-	-	-	-
Unigene0000467	10.66666667	14.66666667	0.6733	0.437	1.3183	0.175	1.0571	1.5173	0.809533333	0.916466667	0.178991922	0.889593999	1	no	-	--	-	-	-	-
Unigene0000468	7.666666667	12	0.779	0.1083	0.4037	0.8242	0.1572	0.6076	0.430333333	0.529666667	0.299630124	0.766745419	1	no	-	--	-	-	-	-
Unigene0000469	801	977.3333333	23.6592	24.328	18.5783	22.2469	23.2246	21.8689	22.1885	22.4468	0.016697649	0.968666848	1	no	Zcchc10	PREDICTED: zinc finger CCHC domain-containing protein 10-like [Sinocyclocheilus anshuiensis]	-	-	GO:0005488//binding;GO:0046914//transition metal ion binding;GO:0043167//ion binding;GO:0046872//metal ion binding;GO:0043169//cation binding	-
Unigene0000470	13	18	1.4592	0.4972	0.9075	1.479	0.756	0.9675	0.954633333	1.0675	0.161217452	0.851948199	1	no	-	--	-	-	-	-
Unigene0000471	1174	1068.333333	22.0521	23.9453	19.9292	17.2217	18.4283	14.2685	21.97553333	16.6395	-0.401286097	0.322357082	1	no	naa20	N-alpha-acetyltransferase 20 [Esox lucius]	-	GO:0044424//intracellular part;GO:0043229//intracellular organelle;GO:0005623//cell;GO:0005622//intracellular;GO:0044464//cell part;GO:0043226//organelle;GO:0043231//intracellular membrane-bounded organelle;GO:0043227//membrane-bounded organelle	GO:0016410//N-acyltransferase activity;GO:0016407//acetyltransferase activity;GO:0016746//transferase activity, transferring acyl groups;GO:0016747//transferase activity, transferring acyl groups other than amino-acyl groups;GO:0034212//peptide N-acetyltransferase activity;GO:0003824//catalytic activity;GO:0016740//transferase activity;GO:0008080//N-acetyltransferase activity	-
Unigene0000472	24.66666667	18.33333333	2.1087	0.6569	3.5844	1.1179	1.1123	1.579	2.116666667	1.269733333	-0.737268554	0.301634976	1	no	-	--	-	-	-	-
Unigene0000473	14.66666667	2.333333333	0.8613	1.118	1.1903	0	0.1352	0.2799	1.056533333	0.138366667	-2.932769948	0.001148882	0.38125559	no	-	--	-	-	-	-
Unigene0000474	12.33333333	33.66666667	0.3436	0.3649	0.4532	0.9253	0.5884	1.0476	0.387233333	0.853766667	1.140638691	0.069932184	1	no	-	PREDICTED: inositol hexakisphosphate and diphosphoinositol-pentakisphosphate kinase 1-like isoform X3 [Cyprinus carpio]	ko04070//Phosphatidylinositol signaling system//Signal transduction//Environmental Information Processing	-	-	-
Unigene0000475	11.33333333	11.66666667	0.4738	0.369	0.7857	0.4063	0.2231	0.7022	0.542833333	0.443866667	-0.290382944	0.729272719	1	no	-	--	-	-	-	-
Unigene0000476	117.6666667	297.3333333	0.8755	0.6486	0.4166	1.7901	1.3329	0.9363	0.6469	1.3531	1.064653847	0.036560464	1	no	AIM1	PREDICTED: serine-rich adhesin for platelets-like [Sinocyclocheilus anshuiensis]	-	-	-	-
Unigene0000477	177	233	3.7924	4.191	2.8896	4.0594	4.692	3.2299	3.624333333	3.993766667	0.140034399	0.769018891	1	no	-	Zgc:162945 protein [Danio rerio]	-	-	-	-
Unigene0000478	84	127.3333333	1.1421	1.3674	1.3918	1.4079	1.7736	1.7216	1.300433333	1.634366667	0.329739244	0.50586628	1	no	-	--	-	-	-	-
Unigene0000479	7	8.333333333	0.8828	0.1983	0.3519	0.4765	0.3838	0.5297	0.477666667	0.463333333	-0.043953727	1	1	no	-	PREDICTED: transcription factor E2-alpha-like isoform X5 [Sinocyclocheilus grahami]	-	-	-	-
Unigene0000480	32	42	0.7485	0.6726	1.3726	0.2244	1.5999	1.2799	0.931233333	1.034733333	0.152044406	0.839540199	1	no	-	--	-	-	-	-
Unigene0000481	7.333333333	8	0.3668	0.7857	0.4563	0.3432	0.7602	0.4006	0.536266667	0.501333333	-0.09718042	0.935155845	1	no	-	--	-	-	-	-
Unigene0000482	369.3333333	696.6666667	2.902	2.8252	2.254	4.0534	4.6055	3.87	2.6604	4.1763	0.650582174	0.125316872	1	no	TRIM35	PREDICTED: zinc-binding protein A33-like [Sinocyclocheilus rhinocerous]	-	-	-	-
Unigene0000483	196.6666667	184.3333333	3.4427	2.4888	4.2042	1.7008	3.0501	3.1241	3.378566667	2.625	-0.3640939	0.463195601	1	no	MYH6	PREDICTED: LOW QUALITY PROTEIN: myosin-7-like [Cyprinus carpio]	ko04530//Tight junction//Cellular commiunity//Cellular Processes	GO:0044464//cell part;GO:0044424//intracellular part;GO:0043228//non-membrane-bounded organelle;GO:0005856//cytoskeleton;GO:0043232//intracellular non-membrane-bounded organelle;GO:0043229//intracellular organelle;GO:0005622//intracellular;GO:0005623//cell;GO:0043226//organelle;GO:0015629//actin cytoskeleton	GO:0005488//binding;GO:0097159//organic cyclic compound binding;GO:0016787//hydrolase activity;GO:1901363//heterocyclic compound binding;GO:0097367//carbohydrate derivative binding;GO:0032549//ribonucleoside binding;GO:0016817//hydrolase activity, acting on acid anhydrides;GO:0005515//protein binding;GO:0003824//catalytic activity;GO:0036094//small molecule binding;GO:0032550//purine ribonucleosi…	GO:0048646//anatomical structure formation involved in morphogenesis;GO:0044763//single-organism cellular process;GO:0071840//cellular component organization or biogenesis;GO:0006936//muscle contraction;GO:0009653//anatomical structure morphogenesis;GO:0003012//muscle system process;GO:0022607//cellular component assembly;GO:0050879//multicellular organismal movement;GO:0044707//single-multicellu…
Unigene0000484	8.333333333	18	0.8943	0.6028	0.2139	0.4827	1.2311	1.3951	0.570333333	1.0363	0.861564452	0.261306813	1	no	-	--	-	-	-	-
Unigene0000485	0	0	0	0	0	0	0	0	0.001	0.001	0	notest	notest	notest	-	--	-	-	-	-
Unigene0000486	2683.666667	3128	46.9586	49.8557	43.6509	39.7078	51.8632	44.8648	46.82173333	45.4786	-0.0419905	0.913066717	1	no	Haus7	PREDICTED: HAUS augmin-like complex subunit 7 [Sinocyclocheilus rhinocerous]	-	-	-	-
Unigene0000487	318	329	19.4098	22.1881	18.171	16.7922	17.28	17.0935	19.92296667	17.05523333	-0.224217998	0.606809423	1	no	-	--	-	-	-	-
Unigene0000488	198.6666667	429.3333333	2.7808	9.1043	1.2784	17.1343	3.8022	2.239	4.387833333	7.725166667	0.816057331	0.292483103	1	no	RGS16	PREDICTED: regulator of G-protein signaling 16-like [Cyprinus carpio]	-	-	-	GO:0065007//biological regulation;GO:0009966//regulation of signal transduction;GO:0045744//negative regulation of G-protein coupled receptor protein signaling pathway;GO:0010646//regulation of cell communication;GO:0048523//negative regulation of cellular process;GO:0009968//negative regulation of signal transduction;GO:0010648//negative regulation of cell communication;GO:0048583//regulation of…
Unigene0000489	693.3333333	1154.333333	10.0043	6.2856	4.4854	15.4826	6.4579	6.1586	6.9251	9.366366667	0.435654612	0.387027628	1	no	galc	PREDICTED: galactocerebrosidase-like [Sinocyclocheilus grahami]	ko01100//Metabolic pathways//Global and Overview//Metabolism;ko04142//Lysosome//Transport and catabolism//Cellular Processes;ko00600//Sphingolipid metabolism//Lipid metabolism//Metabolism	GO:0044444//cytoplasmic part;GO:0005737//cytoplasm;GO:0044464//cell part;GO:0000323//lytic vacuole;GO:0044424//intracellular part;GO:0043226//organelle;GO:0005773//vacuole;GO:0043227//membrane-bounded organelle;GO:0005622//intracellular;GO:0043229//intracellular organelle;GO:0043231//intracellular membrane-bounded organelle;GO:0005623//cell	GO:0003824//catalytic activity;GO:0016787//hydrolase activity;GO:0016798//hydrolase activity, acting on glycosyl bonds;GO:0004553//hydrolase activity, hydrolyzing O-glycosyl compounds	GO:0006687//glycosphingolipid metabolic process;GO:0008152//metabolic process;GO:0006643//membrane lipid metabolic process;GO:1901564//organonitrogen compound metabolic process;GO:0044238//primary metabolic process;GO:0006665//sphingolipid metabolic process;GO:0019374//galactolipid metabolic process;GO:0044255//cellular lipid metabolic process;GO:0044237//cellular metabolic process;GO:1903509//li…
Unigene0000490	9.333333333	11.66666667	1.0796	0.4204	0.5222	1.01	0.7457	0.3368	0.674066667	0.6975	0.049301933	1	1	no	-	--	-	-	-	-
Unigene0000491	101.3333333	179.3333333	2.1578	2.2866	1.3458	2.7839	3.1656	2.6065	1.930066667	2.852	0.563323301	0.251186496	1	no	Kazald1	PREDICTED: kazal-type serine protease inhibitor domain-containing protein 1 [Sinocyclocheilus anshuiensis]	-	-	-	GO:0040007//growth;GO:0016049//cell growth;GO:0044763//single-organism cellular process;GO:0009987//cellular process;GO:0044699//single-organism process
Unigene0000492	8.666666667	21.66666667	0.5326	0.2828	0.4517	0.8682	1.0946	0.6798	0.422366667	0.880866667	1.060427679	0.122990477	1	no	-	hypothetical protein cypCar_00035167 [Cyprinus carpio]	-	-	-	-
Unigene0000493	7.666666667	20.66666667	0.2766	1.2791	0	2.3182	0.3257	0.7551	0.518566667	1.133	1.127546483	0.302720698	1	no	-	--	-	-	-	-
Unigene0000494	60.66666667	32.33333333	1.3359	1.1497	1.0435	0.3019	0.7659	0.5285	1.176366667	0.5321	-1.144568501	0.046907884	1	no	tc1a	transposase [Acipenser fulvescens]	-	-	-	-
Unigene0000495	93	136.6666667	2.7688	1.0911	0.7345	2.6598	1.3816	1.4655	1.531466667	1.835633333	0.261363944	0.669439751	1	no	-	gag-like protein [Danio rerio]	ko01100//Metabolic pathways//Global and Overview//Metabolism;ko01110//Biosynthesis of secondary metabolites//Global and Overview//Metabolism;ko01130//Biosynthesis of antibiotics//Global and Overview//Metabolism;ko00480//Glutathione metabolism//Metabolism of other amino acids//Metabolism;ko00330//Arginine and proline metabolism//Amino acid metabolism//Metabolism	-	-	-
Unigene0000496	12	27.33333333	0.4252	1.1828	0.5667	2.2259	0.8583	0.9476	0.7249	1.343933333	0.89060768	0.210245703	1	no	NLRC3	PREDICTED: NACHT, LRR and PYD domains-containing protein 12-like, partial [Sinocyclocheilus grahami]	ko04621//NOD-like receptor signaling pathway//Immune system//Organismal Systems	-	-	-
Unigene0000497	900.6666667	774.6666667	2.855	3.0277	3.8748	2.0327	2.4828	2.4202	3.2525	2.3119	-0.492470061	0.236537301	1	no	ptprf	PREDICTED: receptor-type tyrosine-protein phosphatase F-like isoform X2 [Sinocyclocheilus rhinocerous]	ko04514//Cell adhesion molecules (CAMs)//Signaling molecules and interaction//Environmental Information Processing;ko04910//Insulin signaling pathway//Endocrine system//Organismal Systems;ko04520//Adherens junction//Cellular commiunity//Cellular Processes	-	-	-
Unigene0000498	7.333333333	14	0.5608	0.042	0.3577	0.3363	0.2844	0.8412	0.320166667	0.4873	0.605987109	0.505380832	1	no	ARL3	PREDICTED: ADP-ribosylation factor-like protein 3 [Poecilia formosa]	-	GO:0044464//cell part;GO:0005623//cell	GO:0032549//ribonucleoside binding;GO:0097159//organic cyclic compound binding;GO:0005488//binding;GO:0032550//purine ribonucleoside binding;GO:0001883//purine nucleoside binding;GO:0097367//carbohydrate derivative binding;GO:1901363//heterocyclic compound binding;GO:0036094//small molecule binding;GO:0001882//nucleoside binding	GO:0023052//signaling;GO:0007154//cell communication;GO:0048638//regulation of developmental growth;GO:0045664//regulation of neuron differentiation;GO:0044700//single organism signaling;GO:0022604//regulation of cell morphogenesis;GO:0007165//signal transduction;GO:0022603//regulation of anatomical structure morphogenesis;GO:0044767//single-organism developmental process;GO:0065008//regulation o…
Unigene0000499	9.666666667	11.33333333	1.0825	0.6323	0.374	0.7877	0.6118	0.6192	0.696266667	0.6729	-0.049247836	1	1	no	-	--	-	-	-	-
Unigene0000500	13.33333333	9.333333333	0.2012	1.3708	1.1119	0.5227	0.3789	0.6276	0.894633333	0.509733333	-0.811553814	0.328978209	1	no	-	--	-	-	-	-
Unigene0000501	6.666666667	9.333333333	1.0569	0.1816	0	1.1633	0.0586	0.1455	0.412833333	0.4558	0.142841462	0.959923793	1	no	-	--	-	-	-	-
Unigene0000502	7.666666667	11.66666667	0.9256	0.4852	0.2214	0.8326	0.8718	0.3887	0.544066667	0.6977	0.358823392	0.694186275	1	no	-	--	-	-	-	-
Unigene0000503	15.66666667	17.66666667	1.0028	1.206	0.5502	1.4256	0.8334	0.3221	0.919666667	0.860366667	-0.09615942	0.934747128	1	no	-	--	-	-	-	-
Unigene0000504	3.666666667	2.666666667	0.1154	0.5056	0	0.135	0.1087	0.135	0.207	0.126233333	-0.713537847	0.603845609	1	no	-	--	-	-	-	-
Unigene0000505	7	7	0.9091	0.236	0.1256	0.945	0	0.0473	0.423566667	0.330766667	-0.356775206	0.821016567	1	no	-	--	-	-	-	-
Unigene0000506	651.3333333	725	13.6751	22.6056	18.2815	18.6033	18.2435	13.6274	18.1874	16.82473333	-0.112355677	0.79536395	1	no	fam213b	PREDICTED: prostamide/prostaglandin F synthase [Sinocyclocheilus anshuiensis]	ko01100//Metabolic pathways//Global and Overview//Metabolism;ko00590//Arachidonic acid metabolism//Lipid metabolism//Metabolism	GO:0044444//cytoplasmic part;GO:0044424//intracellular part;GO:0005737//cytoplasm;GO:0005623//cell;GO:0005622//intracellular;GO:0044464//cell part	GO:0003824//catalytic activity;GO:0016491//oxidoreductase activity;GO:0016614//oxidoreductase activity, acting on CH-OH group of donors	GO:0006631//fatty acid metabolic process;GO:0044237//cellular metabolic process;GO:0006629//lipid metabolic process;GO:0071704//organic substance metabolic process;GO:0009987//cellular process;GO:0044238//primary metabolic process;GO:0044710//single-organism metabolic process;GO:0006690//icosanoid metabolic process;GO:0043436//oxoacid metabolic process;GO:0032787//monocarboxylic acid metabolic pr…
Unigene0000507	590	774.6666667	10.4746	12.0821	9.4691	11.904	11.1273	11.6699	10.67526667	11.56706667	0.115750944	0.780513326	1	no	RNF25	PREDICTED: E3 ubiquitin-protein ligase RNF25-like isoform X1 [Sinocyclocheilus rhinocerous]	-	-	GO:0043167//ion binding;GO:0043169//cation binding;GO:0005488//binding	-
Unigene0000508	6348	7765.666667	37.5751	40.5325	42.4917	37.6704	43.2646	41.1845	40.19976667	40.7065	0.018072054	0.961057317	1	no	ncapg2	PREDICTED: condensin-2 complex subunit G2 [Cyprinus carpio]	-	-	-	-
Unigene0000509	31	16	0.9215	1.5338	0.2773	0.1854	0.672	0.371	0.910866667	0.409466667	-1.153493875	0.124515407	1	no	-	--	-	-	-	-
Unigene0000510	206.3333333	275.6666667	3.4106	1.946	2.4084	2.9317	3.0831	2.5726	2.588333333	2.862466667	0.145235469	0.759023372	1	no	c1galt1a	PREDICTED: glycoprotein-N-acetylgalactosamine 3-beta-galactosyltransferase 1-A-like [Sinocyclocheilus rhinocerous]	ko01100//Metabolic pathways//Global and Overview//Metabolism;ko00512//Mucin type O-glycan biosynthesis//Glycan biosynthesis and metabolism//Metabolism	GO:0016020//membrane;GO:0031224//intrinsic component of membrane;GO:0044425//membrane part	GO:0048531//beta-1,3-galactosyltransferase activity;GO:0016758//transferase activity, transferring hexosyl groups;GO:0043167//ion binding;GO:0016740//transferase activity;GO:0008378//galactosyltransferase activity;GO:0003824//catalytic activity;GO:0043169//cation binding;GO:0005488//binding;GO:0016757//transferase activity, transferring glycosyl groups	GO:0044767//single-organism developmental process;GO:0044763//single-organism cellular process;GO:0006493//protein O-linked glycosylation;GO:0006464//cellular protein modification process;GO:0009059//macromolecule biosynthetic process;GO:0044237//cellular metabolic process;GO:0071704//organic substance metabolic process;GO:0008152//metabolic process;GO:0019538//protein metabolic process;GO:000910…
Unigene0000511	6.666666667	26.33333333	0.1331	0.3023	0.4598	1.6602	0.5432	0.6229	0.2984	0.9421	1.658632668	0.032107054	1	no	-	--	-	-	-	-
Unigene0000512	1833	2160.666667	21.0179	17.9895	30.3687	12.1336	22.5076	32.4763	23.12536667	22.3725	-0.047749762	0.917323513	1	no	fbxo43	PREDICTED: F-box only protein 43-like [Sinocyclocheilus rhinocerous]	ko04114//Oocyte meiosis//Cell growth and death//Cellular Processes	-	-	-
Unigene0000513	3.333333333	11	0.2323	0.1696	0.1806	0.5434	0.6018	0.453	0.194166667	0.532733333	1.456118005	0.079784472	1	no	-	--	-	-	-	-
Unigene0000514	10.66666667	7	0.5837	0.4262	1.3612	0.1138	0.6872	0.5122	0.790366667	0.437733333	-0.852469854	0.370747377	1	no	-	--	-	-	-	-
Unigene0000515	78.33333333	76.66666667	4.4831	4.8346	7.0058	7.313	1.884	3.4969	5.441166667	4.2313	-0.362815043	0.552260103	1	no	-	--	-	-	-	-
Unigene0000516	42.33333333	46	2.433	3.5868	2.81	3.4685	2.4227	2.0062	2.943266667	2.632466667	-0.161002996	0.779327598	1	no	-	--	-	-	-	-
Unigene0000517	10	6.666666667	0.4075	0.2645	1.4078	0.2118	0.1279	0.7416	0.693266667	0.360433333	-0.943677956	0.339132033	1	no	-	--	-	-	-	-
Unigene0000518	1941	2823	18.3946	21.4827	11.7213	20.7734	23.4228	18.5506	17.19953333	20.9156	0.282209963	0.490266219	1	no	Spg7	PREDICTED: paraplegin-like isoform X3 [Sinocyclocheilus anshuiensis]	-	GO:0044425//membrane part;GO:0031224//intrinsic component of membrane;GO:0016020//membrane	GO:0032549//ribonucleoside binding;GO:0008233//peptidase activity;GO:0097367//carbohydrate derivative binding;GO:0036094//small molecule binding;GO:0001883//purine nucleoside binding;GO:0046914//transition metal ion binding;GO:0001882//nucleoside binding;GO:0097159//organic cyclic compound binding;GO:0003824//catalytic activity;GO:0043169//cation binding;GO:0043167//ion binding;GO:0004175//endope…	GO:0051604//protein maturation;GO:0016485//protein processing;GO:0019538//protein metabolic process;GO:0006508//proteolysis;GO:0008152//metabolic process;GO:0044238//primary metabolic process;GO:0043170//macromolecule metabolic process;GO:0071704//organic substance metabolic process;GO:0010467//gene expression
Unigene0000519	573.6666667	583.3333333	15.24	89.0213	21.3935	52.5443	24.6681	27.9874	41.88493333	35.0666	-0.256333821	0.680377852	1	no	S100A4	PREDICTED: ictacalcin-like isoform X1 [Sinocyclocheilus anshuiensis]	-	-	GO:0005488//binding;GO:0046872//metal ion binding;GO:0043167//ion binding;GO:0043169//cation binding	-
Unigene0000520	14.33333333	26.66666667	0.5647	1.2095	0.6438	0.5283	1.4362	1.806	0.806	1.256833333	0.640941605	0.371750772	1	no	-	--	-	-	-	-
Unigene0000521	23.66666667	16	1.856	0.3907	1.3518	1.095	0.2835	0.5478	1.1995	0.6421	-0.901563254	0.246434104	1	no	-	--	-	-	-	-
Unigene0000522	47.33333333	61	2.6557	6.0094	1.4135	6.0435	2.231	2.3514	3.359533333	3.541966667	0.07628979	0.92329527	1	no	-	--	-	-	-	-
Unigene0000523	166.3333333	107.6666667	1.0354	0.3931	3.8633	1.4288	0.4876	0.7753	1.763933333	0.897233333	-0.975240912	0.182910738	1	no	-	--	-	-	-	-
Unigene0000524	34.66666667	42.66666667	1.6035	2.4762	1.662	2.5434	2.1353	1.2076	1.9139	1.9621	0.03588312	0.965173073	1	no	-	--	-	-	-	-
Unigene0000525	773.3333333	1440	10.7074	8.9767	5.0667	11.5752	15.6069	11.5392	8.250266667	12.9071	0.645652232	0.144903734	1	no	MSI1	PREDICTED: RNA-binding protein Musashi homolog 1-like [Danio rerio]	ko03015//mRNA surveillance pathway//Translation//Genetic Information Processing	-	GO:0005488//binding;GO:0097159//organic cyclic compound binding	GO:0007275//multicellular organism development;GO:0044699//single-organism process;GO:0048731//system development;GO:0032502//developmental process;GO:0007399//nervous system development;GO:0032501//multicellular organismal process;GO:0048856//anatomical structure development;GO:0044707//single-multicellular organism process;GO:0044767//single-organism developmental process
Unigene0000526	8.333333333	9.333333333	0.9544	1.1615	0.8656	0.9301	1.2361	0.6514	0.993833333	0.9392	-0.081571522	1	1	no	-	--	-	-	-	-
Unigene0000527	3027.333333	2481.333333	92.5344	100.2483	104.3955	62.2509	72.5364	67.0391	99.0594	67.27546667	-0.558213389	0.143522244	1	no	DYNLRB1	PREDICTED: dynein light chain roadblock-type 1 isoform X1 [Sinocyclocheilus anshuiensis]	-	GO:0015630//microtubule cytoskeleton;GO:0043228//non-membrane-bounded organelle;GO:0005622//intracellular;GO:0044464//cell part;GO:0044424//intracellular part;GO:0043232//intracellular non-membrane-bounded organelle;GO:0005623//cell;GO:0044446//intracellular organelle part;GO:0044430//cytoskeletal part;GO:0044422//organelle part;GO:0005856//cytoskeleton;GO:0043226//organelle;GO:0005875//microtubu…	-	GO:0009987//cellular process;GO:0044699//single-organism process;GO:0023052//signaling;GO:0007154//cell communication;GO:0050789//regulation of biological process;GO:0044763//single-organism cellular process;GO:0007167//enzyme linked receptor protein signaling pathway;GO:0051716//cellular response to stimulus;GO:0007165//signal transduction;GO:0065007//biological regulation;GO:0050896//response t…
Unigene0000528	244.6666667	497.6666667	2.3302	3.3294	2.2475	3.2213	4.8979	5.2846	2.6357	4.467933333	0.76142149	0.096803786	1	no	tbx1	PREDICTED: T-box transcription factor TBX1 isoform X1 [Sinocyclocheilus anshuiensis]	-	GO:0043231//intracellular membrane-bounded organelle;GO:0005622//intracellular;GO:0005623//cell;GO:0043229//intracellular organelle;GO:0044424//intracellular part;GO:0044464//cell part;GO:0043226//organelle;GO:0043227//membrane-bounded organelle	GO:0005488//binding;GO:0003677//DNA binding;GO:0003676//nucleic acid binding;GO:0001071//nucleic acid binding transcription factor activity;GO:0005515//protein binding;GO:1901363//heterocyclic compound binding;GO:0097159//organic cyclic compound binding;GO:0046983//protein dimerization activity	GO:0003143//embryonic heart tube morphogenesis;GO:0009653//anatomical structure morphogenesis;GO:0044260//cellular macromolecule metabolic process;GO:0016070//RNA metabolic process;GO:0008152//metabolic process;GO:0006139//nucleobase-containing compound metabolic process;GO:0034641//cellular nitrogen compound metabolic process;GO:0043170//macromolecule metabolic process;GO:0071704//organic substa…
Unigene0000529	12.33333333	3.666666667	0.8007	0.4197	1.0853	0.1921	0.2321	0.1441	0.768566667	0.189433333	-2.020480192	0.01570683	1	no	-	--	-	-	-	-
Unigene0000530	3	7.666666667	0.3668	0	0.3042	0.5148	0.5528	0.3434	0.223666667	0.470333333	1.072333316	0.307229755	1	no	-	--	-	-	-	-
Unigene0000531	502.6666667	362	36.6664	11.7909	53.4539	11.8288	9.5901	36.594	33.9704	19.33763333	-0.812866967	0.195861584	1	no	-	--	-	-	-	-
Unigene0000532	8848	13442.33333	31.0879	50.7432	20.8011	41.3548	55.8235	34.7863	34.21073333	43.9882	0.362667538	0.399076036	1	no	EEF2	PREDICTED: elongation factor 2 [Sinocyclocheilus anshuiensis]	-	-	-	-
Unigene0000533	1252	801.3333333	8.3317	2.3028	13.0821	4.2982	2.766	5.0509	7.905533333	4.038366667	-0.969090888	0.083794373	1	no	Prss56	PREDICTED: serine protease 56 [Pygocentrus nattereri]	-	-	-	-
Unigene0000534	4831	4149.666667	41.9695	51.5093	55.0928	31.1361	35.0488	39.007	49.52386667	35.06396667	-0.498134748	0.19036954	1	no	ZNF706	PREDICTED: zinc finger protein 706 isoform X1 [Sinocyclocheilus rhinocerous]	-	-	-	-
Unigene0000535	38.33333333	34.66666667	2.221	1.2433	2.9926	0.6926	2.3012	1.9056	2.1523	1.633133333	-0.398236602	0.552385478	1	no	-	--	-	-	-	-
Unigene0000536	343	428	3.013	4.1949	3.647	2.9076	2.9472	5.2017	3.6183	3.6855	0.026548329	0.955884373	1	no	CRISPLD1	PREDICTED: cysteine-rich secretory protein LCCL domain-containing 1-like [Sinocyclocheilus anshuiensis]	-	-	-	-
Unigene0000537	60	33.33333333	2.0512	3.8765	5.0025	1.0818	2.2731	1.7412	3.6434	1.6987	-1.100854307	0.064263117	1	no	-	--	-	-	-	-
Unigene0000538	2	6.333333333	0	0.0996	0.212	0.4783	0.2408	0.0798	0.103866667	0.2663	1.358319696	0.307364943	1	no	-	--	-	-	-	-
Unigene0000539	14.66666667	16.66666667	0.3311	1.105	0.6373	0.295	0.9355	0.7747	0.691133333	0.6684	-0.048252329	0.965944099	1	no	-	--	-	-	-	-
Unigene0000540	5	12.66666667	0.7178	0.3494	0	1.6787	0.2704	0.2239	0.355733333	0.724333333	1.025857603	0.367026677	1	no	-	--	-	-	-	-
Unigene0000541	695	457	11.4247	4.6036	8.1209	3.6776	3.3486	5.8512	8.049733333	4.292466667	-0.90713406	0.059506651	1	no	ZNF271	PREDICTED: zinc finger protein 239-like isoform X1 [Sinocyclocheilus grahami]	-	-	-	-
Unigene0000542	953.3333333	1447	3.0017	2.9883	2.4395	3.3691	4.0205	3.2742	2.809833333	3.5546	0.339202663	0.401570441	1	no	aasdh	PREDICTED: acyl-CoA synthetase family member 4 isoform X1 [Sinocyclocheilus anshuiensis]	-	-	GO:0097159//organic cyclic compound binding;GO:0032550//purine ribonucleoside binding;GO:0001882//nucleoside binding;GO:1901363//heterocyclic compound binding;GO:0097367//carbohydrate derivative binding;GO:0036094//small molecule binding;GO:0001883//purine nucleoside binding;GO:0032549//ribonucleoside binding;GO:0016877//ligase activity, forming carbon-sulfur bonds;GO:0016874//ligase activity;GO:…	GO:0044281//small molecule metabolic process;GO:0032787//monocarboxylic acid metabolic process;GO:0044699//single-organism process;GO:0044710//single-organism metabolic process;GO:0044238//primary metabolic process;GO:0044763//single-organism cellular process;GO:0006082//organic acid metabolic process;GO:0071704//organic substance metabolic process;GO:0044237//cellular metabolic process;GO:000998…
Unigene0000543	37	42.33333333	1.0139	1.0768	1.3375	0.8144	1.968	0.5992	1.142733333	1.1272	-0.019745261	0.98436093	1	no	-	PREDICTED: uncharacterized protein LOC107715642 [Sinocyclocheilus rhinocerous]	-	-	-	-
Unigene0000544	15	19.33333333	1.3787	0.7771	1.1281	1.0183	1.0936	1.3584	1.094633333	1.156766667	0.079650191	0.963705157	1	no	-	--	-	-	-	-
Unigene0000545	5	6.666666667	0.0649	0.2528	0.6728	0.2024	0.5503	0.3544	0.330166667	0.369033333	0.160556661	0.931503043	1	no	-	--	-	-	-	-
Unigene0000546	11	38	0.2	0.9737	0.1244	2.1522	0.5653	0.9362	0.4327	1.2179	1.492956655	0.07694363	1	no	-	--	-	-	-	-
Unigene0000547	615	466	11.9557	5.1569	10.7323	4.573	5.2572	7.3881	9.281633333	5.739433333	-0.693470402	0.143225175	1	no	-	PREDICTED: dynein light chain 1, cytoplasmic-like [Cyprinus carpio]	-	-	-	-
Unigene0000548	3.333333333	2	0.6649	0.2158	0.2297	0	0.2088	0.3458	0.370133333	0.184866667	-1.001559952	0.415654658	1	no	-	--	-	-	-	-
Unigene0000549	21.33333333	36	2.3345	0.627	2.2528	1.9456	2.8056	2.5117	1.7381	2.420966667	0.478072127	0.467775652	1	no	-	--	-	-	-	-
Unigene0000550	856.6666667	1380.666667	4.4912	4.4966	4.7157	5.9132	6.6485	5.7503	4.567833333	6.104	0.41824495	0.297763163	1	no	PLEKHM3	PREDICTED: pleckstrin homology domain-containing family M member 3-like isoform X1 [Sinocyclocheilus rhinocerous]	-	-	-	-
Unigene0000551	59.66666667	72	4.221	2.095	8.7501	7.2915	3.82	3.4862	5.022033333	4.8659	-0.045564933	0.952990782	1	no	-	--	-	-	-	-
Unigene0000552	1392.333333	1462	7.8583	6.1298	11.7431	4.6568	6.1836	11.0932	8.577066667	7.3112	-0.230376117	0.621008509	1	no	AP3B2	PREDICTED: AP-3 complex subunit beta-2 isoform X4 [Sinocyclocheilus rhinocerous]	ko04142//Lysosome//Transport and catabolism//Cellular Processes	GO:0044464//cell part;GO:0030117//membrane coat;GO:0048475//coated membrane;GO:0044425//membrane part;GO:0032991//macromolecular complex;GO:0005623//cell;GO:0044444//cytoplasmic part;GO:0044424//intracellular part;GO:0030119//AP-type membrane coat adaptor complex;GO:0043234//protein complex;GO:0005622//intracellular;GO:0016020//membrane;GO:0005737//cytoplasm;GO:0098796//membrane protein complex	-	GO:0051179//localization;GO:0006810//transport;GO:0051234//establishment of localization
Unigene0000553	6.333333333	1.333333333	1.2341	0.0924	0.492	0.148	0.0894	0.074	0.606166667	0.1038	-2.545908076	0.034197522	1	no	-	PREDICTED: uncharacterized protein LOC109112128 [Cyprinus carpio]	-	-	-	-
Unigene0000554	185.3333333	418.3333333	2.2617	1.7393	1.2805	4.6009	3.2582	2.0014	1.7605	3.286833333	0.900713076	0.06910818	1	no	pol	PREDICTED: olfactory receptor 52D1-like [Fundulus heteroclitus]	-	-	-	-
Unigene0000555	2518	3463.333333	20.5053	20.44	22.0108	22.2155	28.3732	21.5851	20.98536667	24.05793333	0.197129044	0.607832836	1	no	-	Uncharacterized protein C3orf30 [Cricetulus griseus]	-	-	-	-
Unigene0000556	12.33333333	16.33333333	1.9096	0.485	0.6884	1.424	0.9384	0.9714	1.027666667	1.111266667	0.112832668	0.924641143	1	no	-	PREDICTED: regucalcin isoform X1 [Oreochromis niloticus]	-	-	-	-
Unigene0000557	0	0.666666667	0	0	0	0	0.1459	0	0.001	0.048633333	5.603873572	0.558345317	1	no	-	--	-	-	-	-
Unigene0000558	123.6666667	101	5.0647	1.5075	5.5504	1.5342	2.4005	4.1016	4.040866667	2.678766667	-0.593095828	0.331239635	1	no	ccdc176	PREDICTED: basal body-orientation factor 1-like [Cyprinus carpio]	-	-	-	-
Unigene0000559	28.66666667	44.33333333	4.1926	2.1902	2.4377	3.4281	3.3712	4.387	2.940166667	3.728766667	0.342800583	0.568814117	1	no	-	PREDICTED: RNA-directed DNA polymerase from mobile element jockey-like, partial [Larimichthys crocea]	-	-	-	-
Unigene0000560	643.6666667	966.6666667	6.5472	7.3138	4.557	6.7736	10.7494	5.9419	6.139333333	7.821633333	0.349387904	0.433055138	1	no	AKAP17A	PREDICTED: A-kinase anchor protein 17A [Pygocentrus nattereri]	-	GO:0044424//intracellular part;GO:0005623//cell;GO:0044428//nuclear part;GO:0044446//intracellular organelle part;GO:0031974//membrane-enclosed lumen;GO:0016604//nuclear body;GO:0005654//nucleoplasm;GO:0044464//cell part;GO:0005634//nucleus;GO:0070013//intracellular organelle lumen;GO:0043233//organelle lumen;GO:0005622//intracellular;GO:0043231//intracellular membrane-bounded organelle;GO:004445…	GO:0005515//protein binding;GO:0097159//organic cyclic compound binding;GO:0005488//binding	GO:0010467//gene expression;GO:0006396//RNA processing;GO:0006807//nitrogen compound metabolic process;GO:0044238//primary metabolic process;GO:0006139//nucleobase-containing compound metabolic process;GO:0044260//cellular macromolecule metabolic process;GO:0034641//cellular nitrogen compound metabolic process;GO:0090304//nucleic acid metabolic process;GO:1901360//organic cyclic compound metaboli…
Unigene0000561	60.66666667	117	0.8052	0.7412	1.1381	1.5524	1.1722	1.4846	0.894833333	1.403066667	0.648892656	0.207815467	1	no	nkd2l	PREDICTED: protein naked cuticle homolog 2-like [Sinocyclocheilus anshuiensis]	ko04310//Wnt signaling pathway//Signal transduction//Environmental Information Processing	GO:0044464//cell part;GO:0016020//membrane;GO:0005623//cell	-	GO:0032502//developmental process;GO:0050794//regulation of cellular process;GO:0009653//anatomical structure morphogenesis;GO:0009966//regulation of signal transduction;GO:0023051//regulation of signaling;GO:0048583//regulation of response to stimulus;GO:0023057//negative regulation of signaling;GO:0048856//anatomical structure development;GO:0065007//biological regulation;GO:0048646//anatomical…
Unigene0000562	2669.333333	2965.666667	69.5686	73.2015	51.0847	58.2052	64.4328	56.5705	64.61826667	59.73616667	-0.113337391	0.770798046	1	no	Ppif	PREDICTED: peptidyl-prolyl cis-trans isomerase A-like [Sinocyclocheilus grahami]	ko04020//Calcium signaling pathway//Signal transduction//Environmental Information Processing	-	GO:0016859//cis-trans isomerase activity;GO:0016853//isomerase activity;GO:0003824//catalytic activity	GO:0008152//metabolic process;GO:0044238//primary metabolic process;GO:0044267//cellular protein metabolic process;GO:0009987//cellular process;GO:0071704//organic substance metabolic process;GO:0043170//macromolecule metabolic process;GO:0019538//protein metabolic process;GO:0044237//cellular metabolic process;GO:0044260//cellular macromolecule metabolic process
Unigene0000563	21	17.66666667	0.725	0.5813	1.4146	0.5985	1.0043	0.3327	0.906966667	0.645166667	-0.491377627	0.495944086	1	no	-	--	-	-	-	-
Unigene0000564	14	27.66666667	0.742	0.6113	1.0649	1.424	0.6989	1.6919	0.806066667	1.2716	0.657673853	0.341007455	1	no	-	PREDICTED: neuron navigator 3-like [Poecilia mexicana]	-	-	-	-
Unigene0000565	24.33333333	20.33333333	0.6262	0.3811	0.9195	0.4069	0.3933	0.5088	0.642266667	0.436333333	-0.557741732	0.384407614	1	no	-	--	-	-	-	-
Unigene0000566	13.66666667	18	1.7348	0.1126	0.5394	0.5861	0.7626	1.2179	0.7956	0.855533333	0.10478079	0.911543654	1	no	-	--	-	-	-	-
Unigene0000567	77.33333333	82.66666667	3.2323	2.633	1.7777	2.8543	2.0194	1.8523	2.547666667	2.242	-0.184390251	0.728892769	1	no	-	--	-	-	-	-
Unigene0000568	276.6666667	380	1.1872	0.5619	2.2082	0.9366	0.9194	2.4744	1.3191	1.443466667	0.129983854	0.825535106	1	no	CUX2	PREDICTED: homeobox protein cut-like 2 [Sinocyclocheilus anshuiensis]	-	-	-	-
Unigene0000569	986.6666667	1659.666667	3.8064	3.8573	3.6027	7.1998	3.6354	4.5395	3.755466667	5.1249	0.448531661	0.293787364	1	no	Apbb2	PREDICTED: amyloid beta A4 precursor protein-binding family B member 2-like isoform X4 [Sinocyclocheilus grahami]	-	-	-	-
Unigene0000570	1795.666667	1497	30.9458	11.4099	47.6855	19.2369	19.1947	22.5205	30.01373333	20.31736667	-0.562909357	0.258347715	1	no	PIM3	PREDICTED: serine/threonine-protein kinase 33-like [Cyprinus carpio]	-	-	-	-
Unigene0000571	37.66666667	55	2.2843	3.486	1.1518	2.6954	4.8266	1.252	2.307366667	2.924666667	0.342024923	0.608567682	1	no	-	PREDICTED: probable serine/threonine-protein kinase clkA [Sinocyclocheilus grahami]	-	-	-	-
Unigene0000572	14.66666667	16.66666667	0.9737	1.9907	1.312	1.3665	1.6509	1.0633	1.425466667	1.360233333	-0.067580152	0.961946291	1	no	-	PREDICTED: probable serine/threonine-protein kinase clkA [Sinocyclocheilus grahami]	-	-	-	-
Unigene0000573	118	217.3333333	10.3825	4.5392	2.0426	2.6232	17.1595	7.6111	5.654766667	9.131266667	0.691347506	0.329846992	1	no	-	PREDICTED: mucin-2-like [Sinocyclocheilus anshuiensis]	-	-	-	-
Unigene0000574	35.66666667	65.66666667	1.8918	2.4749	1.9608	3.4568	4.9003	1.5679	2.109166667	3.308333333	0.6494315	0.271673149	1	no	-	PREDICTED: mucin-2-like [Sinocyclocheilus anshuiensis]	-	-	-	-
Unigene0000575	51	85.66666667	1.2875	1.4026	2.0334	1.9119	3.5803	1.2673	1.5745	2.253166667	0.517060276	0.375804045	1	no	MUC5B	PREDICTED: mucin-2 [Danio rerio]	-	-	-	-
Unigene0000576	23.33333333	30.66666667	1.3467	0.9535	0.5499	0.7954	1.3069	1.0504	0.950033333	1.0509	0.145575355	0.836577595	1	no	-	PREDICTED: transmembrane protein 182 isoform X1 [Hippocampus comes]	-	-	-	-
Unigene0000577	0	0	0	0	0	0	0	0	0.001	0.001	0	notest	notest	notest	-	--	-	-	-	-
Unigene0000578	33	24.33333333	2.194	1.8817	1.0829	1.1404	0.7381	1.2224	1.719533333	1.033633333	-0.734292582	0.229752201	1	no	-	--	-	-	-	-
Unigene0000579	0.333333333	0.333333333	0.1122	0	0	0	0	0.0875	0.0374	0.029166667	-0.358717754	1	1	no	-	--	-	-	-	-
Unigene0000580	0	0	0	0	0	0	0	0	0.001	0.001	0	notest	notest	notest	-	--	-	-	-	-
Unigene0000581	48.33333333	62.33333333	0.7559	1.7444	1.567	1.4843	1.7141	1.1793	1.355766667	1.459233333	0.106101685	0.862563334	1	no	-	--	-	-	-	-
Unigene0000582	33	32.33333333	2.5187	2.3035	2.7688	2.7968	2.013	1.3098	2.530333333	2.039866667	-0.310852595	0.607810363	1	no	-	--	-	-	-	-
Unigene0000583	149	137.6666667	6.4408	12.2165	6.0427	7.6188	7.4788	4.0711	8.233333333	6.389566667	-0.365758543	0.489655253	1	no	-	--	-	-	-	-
Unigene0000584	6.333333333	5.666666667	0.3005	0.0836	0.4449	0.1673	0.2022	0.2344	0.276333333	0.2013	-0.457062429	0.636578291	1	no	-	--	-	-	-	-
Unigene0000585	7.666666667	8.333333333	0.6112	0.6942	1.0558	0.3177	0.4797	1.2713	0.787066667	0.689566667	-0.190795804	0.878762218	1	no	-	--	-	-	-	-
Unigene0000586	1340.333333	2007.666667	13.7168	14.0239	9.6098	13.7174	18.9729	14.2537	12.45016667	15.648	0.32981322	0.420725773	1	no	PGR	PREDICTED: LOW QUALITY PROTEIN: progesterone receptor-like [Cyprinus carpio]	ko04114//Oocyte meiosis//Cell growth and death//Cellular Processes;ko04914//Progesterone-mediated oocyte maturation//Endocrine system//Organismal Systems	GO:0043226//organelle;GO:0043231//intracellular membrane-bounded organelle;GO:0005623//cell;GO:0005622//intracellular;GO:0044424//intracellular part;GO:0043229//intracellular organelle;GO:0043227//membrane-bounded organelle;GO:0044464//cell part	GO:0003677//DNA binding;GO:0060089//molecular transducer activity;GO:0001071//nucleic acid binding transcription factor activity;GO:0043167//ion binding;GO:0003676//nucleic acid binding;GO:1901363//heterocyclic compound binding;GO:0046914//transition metal ion binding;GO:0043169//cation binding;GO:0005488//binding;GO:0097159//organic cyclic compound binding;GO:0038023//signaling receptor activity…	GO:0023052//signaling;GO:0009725//response to hormone;GO:0071495//cellular response to endogenous stimulus;GO:0050896//response to stimulus;GO:0018130//heterocycle biosynthetic process;GO:0044238//primary metabolic process;GO:0006807//nitrogen compound metabolic process;GO:0007154//cell communication;GO:0007165//signal transduction;GO:1901576//organic substance biosynthetic process;GO:0042221//re…
Unigene0000587	641	439.3333333	52.7663	20.8259	58.4921	21.0192	20.2134	32.0475	44.0281	24.4267	-0.849965616	0.085906946	1	no	-	--	-	-	-	-
Unigene0000588	41	45	1.2384	0.3836	1.8962	0.9436	0.7423	1.4051	1.172733333	1.030333333	-0.186763844	0.780418135	1	no	-	--	-	-	-	-
Unigene0000589	531.3333333	920.3333333	5.0435	5.6682	3.6977	7.2782	8.1792	5.4454	4.803133333	6.9676	0.536685945	0.213853476	1	no	Znf319	PREDICTED: zinc finger protein 319-like [Danio rerio]	-	-	-	-
Unigene0000590	25	29	2.0501	0.917	1.206	0.5616	2.4529	1.1669	1.391033333	1.3938	0.002866568	1	1	no	-	--	-	-	-	-
Unigene0000591	17.66666667	20	0.7426	0.482	2.1166	0.9649	0.9909	1.1102	1.113733333	1.022	-0.124008646	0.882811423	1	no	-	--	-	-	-	-
Unigene0000592	1618.666667	1728	14.5915	16.5273	18.1402	10.9427	13.7727	18.5069	16.41966667	14.40743333	-0.188611495	0.646168502	1	no	spop	speckle-type POZ protein [Danio rerio]	-	GO:1902494//catalytic complex;GO:0005622//intracellular;GO:0043234//protein complex;GO:0005634//nucleus;GO:0043233//organelle lumen;GO:0043229//intracellular organelle;GO:0000151//ubiquitin ligase complex;GO:0070013//intracellular organelle lumen;GO:0044422//organelle part;GO:0044464//cell part;GO:0031974//membrane-enclosed lumen;GO:0043226//organelle;GO:0044446//intracellular organelle part;GO:0…	GO:0005515//protein binding;GO:0005488//binding;GO:0044389//ubiquitin-like protein ligase binding;GO:0019899//enzyme binding	GO:0036211//protein modification process;GO:0071704//organic substance metabolic process;GO:0048583//regulation of response to stimulus;GO:0033500//carbohydrate homeostasis;GO:0016567//protein ubiquitination;GO:0051603//proteolysis involved in cellular protein catabolic process;GO:0006464//cellular protein modification process;GO:0044248//cellular catabolic process;GO:0043067//regulation of progr…
Unigene0000593	78.33333333	66	5.4583	5.3743	3.7287	6.0447	1.5774	2.2255	4.853766667	3.282533333	-0.564295095	0.357284509	1	no	-	--	-	-	-	-
Unigene0000594	206	317	2.52	4.1371	3.5338	4.7255	5.1507	3.2247	3.396966667	4.366966667	0.362384457	0.444231559	1	no	-	--	-	-	-	-
Unigene0000595	236.6666667	317.3333333	9.8482	7.3537	5.4176	7.0568	9.9367	8.3778	7.539833333	8.4571	0.165630404	0.726852364	1	no	-	--	-	-	-	-
Unigene0000596	14.33333333	7.666666667	1.4847	0.5129	0.0496	0.112	0.4511	0.3736	0.6824	0.312233333	-1.127993082	0.251149239	1	no	-	PREDICTED: polyglutamine-binding protein 1-like [Acanthisitta chloris]	-	-	-	-
Unigene0000597	26.33333333	63	1.4954	0.7279	0.8974	3.7738	0.8155	1.3506	1.040233333	1.979966667	0.928568969	0.170060914	1	no	Tf2-9	PREDICTED: RNA-directed DNA polymerase homolog, partial [Danio rerio]	-	-	-	-
Unigene0000598	3343.666667	3277	47.7351	29.0237	73.3716	25.952	34.9758	58.4696	50.04346667	39.79913333	-0.330444718	0.478001206	1	no	dnaaf2	PREDICTED: protein kintoun isoform X2 [Sinocyclocheilus grahami]	-	-	-	-
Unigene0000599	32.66666667	25.33333333	2.9711	1.0744	4.3992	1.0589	0.8795	3.2445	2.8149	1.727633333	-0.704286614	0.339706295	1	no	-	PREDICTED: serine/arginine repetitive matrix protein 2-like isoform X1 [Hippocampus comes]	-	-	-	-
Unigene0000600	6.333333333	5.666666667	0.5133	0.7995	0.6384	0	1.1603	0.4004	0.6504	0.520233333	-0.322168416	0.818560817	1	no	-	--	-	-	-	-
Unigene0000601	63	60.33333333	7.1101	3.2014	6.6325	6.9291	2.8463	3.2583	5.648	4.344566667	-0.378527801	0.530234387	1	no	-	PREDICTED: protein NLRC5-like, partial [Sinocyclocheilus grahami]	-	-	-	-
Unigene0000602	88.66666667	169.3333333	1.2053	5.5275	1.6109	7.1466	2.898	3.0184	2.781233333	4.354333333	0.646727068	0.322280293	1	no	-	PREDICTED: uncharacterized protein LOC107741621 [Sinocyclocheilus rhinocerous]	-	-	-	-
Unigene0000603	508.3333333	702.6666667	5.5266	6.2081	4.4614	9.5786	3.7641	4.7751	5.3987	6.039266667	0.161761327	0.733663252	1	no	-	PREDICTED: protein NLRC5-like, partial [Sinocyclocheilus grahami]	-	-	-	-
Unigene0000604	28	27.66666667	0.8464	0.3987	1.0754	0.5535	0.3858	0.8945	0.7735	0.611266667	-0.339599395	0.621248481	1	no	-	--	-	-	-	-
Unigene0000605	51.66666667	90.66666667	1.0926	0.9849	1.0695	1.5932	1.3341	1.594	1.049	1.5071	0.522760469	0.311033291	1	no	MRAS	PREDICTED: ras-related protein M-Ras-like [Sinocyclocheilus anshuiensis]	ko04010//MAPK signaling pathway//Signal transduction//Environmental Information Processing;ko04810//Regulation of actin cytoskeleton//Cell motility//Cellular Processes;ko04530//Tight junction//Cellular commiunity//Cellular Processes	-	GO:0005488//binding;GO:0097367//carbohydrate derivative binding;GO:1901363//heterocyclic compound binding;GO:0032550//purine ribonucleoside binding;GO:0001883//purine nucleoside binding;GO:0001882//nucleoside binding;GO:0097159//organic cyclic compound binding;GO:0036094//small molecule binding;GO:0003824//catalytic activity;GO:0032549//ribonucleoside binding	GO:1901135//carbohydrate derivative metabolic process;GO:0044700//single organism signaling;GO:0019693//ribose phosphate metabolic process;GO:0034655//nucleobase-containing compound catabolic process;GO:0009056//catabolic process;GO:0055086//nucleobase-containing small molecule metabolic process;GO:1901575//organic substance catabolic process;GO:0046483//heterocycle metabolic process;GO:0072521//…
Unigene0000606	2126.333333	3431.333333	10.9811	11.2544	11.1275	11.3716	17.3208	16.1665	11.121	14.95296667	0.427145222	0.275202045	1	no	SOS1	PREDICTED: son of sevenless homolog 1 isoform X1 [Pygocentrus nattereri]	ko04010//MAPK signaling pathway//Signal transduction//Environmental Information Processing;ko04510//Focal adhesion//Cellular commiunity//Cellular Processes;ko04810//Regulation of actin cytoskeleton//Cell motility//Cellular Processes;ko04068//FoxO signaling pathway//Signal transduction//Environmental Information Processing;ko04910//Insulin signaling pathway//Endocrine system//Organismal Systems;ko…	-	-	-
Unigene0000607	104	137.3333333	2.4313	3.4241	1.468	2.9629	2.9794	2.1543	2.441133333	2.698866667	0.144802608	0.785143939	1	no	hoxb7a	PREDICTED: homeobox protein Hox-B7a-like [Sinocyclocheilus anshuiensis]	-	GO:0043227//membrane-bounded organelle;GO:0043226//organelle;GO:0044464//cell part;GO:0005622//intracellular;GO:0005623//cell;GO:0043229//intracellular organelle;GO:0043231//intracellular membrane-bounded organelle;GO:0044424//intracellular part	GO:0001071//nucleic acid binding transcription factor activity;GO:0003676//nucleic acid binding;GO:1901363//heterocyclic compound binding;GO:0005488//binding;GO:0003677//DNA binding;GO:0097159//organic cyclic compound binding	GO:0006139//nucleobase-containing compound metabolic process;GO:0043170//macromolecule metabolic process;GO:0032774//RNA biosynthetic process;GO:0008152//metabolic process;GO:0044238//primary metabolic process;GO:0018130//heterocycle biosynthetic process;GO:0006725//cellular aromatic compound metabolic process;GO:0009059//macromolecule biosynthetic process;GO:0097659//nucleic acid-templated trans…
Unigene0000608	974.6666667	719.3333333	11.3745	7.3412	10.0357	6.7024	6.292	4.5468	9.5838	5.847066667	-0.712884761	0.096796954	1	no	ZNF34	PREDICTED: zinc finger protein 501-like isoform X2 [Sinocyclocheilus grahami]	-	-	GO:0097159//organic cyclic compound binding;GO:0043169//cation binding;GO:0005488//binding;GO:0043167//ion binding	-
Unigene0000609	64.66666667	58.66666667	1.8994	1.2502	2.0796	1.4391	1.3607	1.106	1.743066667	1.301933333	-0.420972173	0.433519694	1	no	-	--	-	-	-	-
Unigene0000610	69	63	1.2432	1.0807	2.324	0.5712	1.4429	1.5065	1.5493	1.173533333	-0.400757708	0.507010796	1	no	eif4e1b	PREDICTED: eukaryotic translation initiation factor 4E-1B-like isoform X2 [Cyprinus carpio]	ko03013//RNA transport//Translation//Genetic Information Processing;ko04910//Insulin signaling pathway//Endocrine system//Organismal Systems;ko04150//mTOR signaling pathway//Signal transduction//Environmental Information Processing	GO:0043231//intracellular membrane-bounded organelle;GO:0044424//intracellular part;GO:0034518//RNA cap binding complex;GO:0043229//intracellular organelle;GO:0043227//membrane-bounded organelle;GO:0005623//cell;GO:0043234//protein complex;GO:0044464//cell part;GO:0043226//organelle;GO:0005622//intracellular;GO:0032991//macromolecular complex	GO:1901363//heterocyclic compound binding;GO:0097159//organic cyclic compound binding;GO:0003723//RNA binding;GO:0005488//binding;GO:0003676//nucleic acid binding;GO:0008135//translation factor activity, RNA binding	GO:0044238//primary metabolic process;GO:0071704//organic substance metabolic process;GO:0044260//cellular macromolecule metabolic process;GO:0034645//cellular macromolecule biosynthetic process;GO:0044237//cellular metabolic process;GO:0006518//peptide metabolic process;GO:0044267//cellular protein metabolic process;GO:0006412//translation;GO:1901564//organonitrogen compound metabolic process;GO…
Unigene0000611	17	13	1.1535	1.1679	0	0.5756	0.3477	0.5399	0.7738	0.487733333	-0.665868154	0.505799145	1	no	-	--	-	-	-	-
Unigene0000612	107.3333333	115	2.9004	17.8336	3.4808	7.6763	3.3071	10.121	8.0716	7.0348	-0.198345273	0.783014229	1	no	-	--	-	-	-	-
Unigene0000613	184.6666667	334	1.5408	4.306	1.4455	6.4928	2.4146	1.8856	2.430766667	3.597666667	0.56565011	0.353695889	1	no	GIMAP7	PREDICTED: GTPase IMAP family member 7-like [Sinocyclocheilus rhinocerous]	-	-	GO:1901363//heterocyclic compound binding;GO:0097159//organic cyclic compound binding;GO:0032550//purine ribonucleoside binding;GO:0036094//small molecule binding;GO:0097367//carbohydrate derivative binding;GO:0005488//binding;GO:0001882//nucleoside binding;GO:0032549//ribonucleoside binding;GO:0001883//purine nucleoside binding	-
Unigene0000614	1517	1832.333333	15.7075	8.8118	11.0175	10.2091	13.1326	12.2521	11.8456	11.8646	0.002312187	0.996163879	1	no	gag-pol	PREDICTED: protein NYNRIN-like [Oreochromis niloticus]	-	-	-	-
Unigene0000615	1789	2498.333333	10.8523	13.4612	6.9294	12.8849	11.8624	11.4507	10.4143	12.066	0.212381616	0.606888019	1	no	pol	PREDICTED: protein NYNRIN-like [Oreochromis niloticus]	-	-	-	-
Unigene0000616	291.6666667	361	7.6845	5.1051	8.5159	6.6693	7.3293	7.6716	7.101833333	7.2234	0.024486559	0.959129059	1	no	CRYBA2	PREDICTED: beta-crystallin A2-like [Sinocyclocheilus rhinocerous]	-	-	-	-
Unigene0000617	33	57.33333333	3.3106	1.813	5.2543	3.9523	4.1903	6.4559	3.4593	4.866166667	0.4923056	0.412446447	1	no	-	PREDICTED: zinc finger protein ZFP69-like isoform X1 [Ictalurus punctatus]	-	-	-	-
Unigene0000618	1.666666667	0	0	0.2282	0.162	0	0	0	0.130066667	0.001	-7.023107467	0.131002148	1	no	-	--	-	-	-	-
Unigene0000619	21	23	0.9275	0.5016	1.8692	0.7633	1.1648	1.045	1.099433333	0.991033333	-0.149754637	0.842884584	1	no	-	--	-	-	-	-
Unigene0000620	0	0	0	0	0	0	0	0	0.001	0.001	0	notest	notest	notest	-	--	-	-	-	-
Unigene0000621	184	165.6666667	3.887	2.2445	4.483	2.1094	1.9922	3.6264	3.538166667	2.576	-0.457869415	0.371105124	1	no	-	PREDICTED: L-rhamnose-binding lectin CSL2-like [Sinocyclocheilus rhinocerous]	-	-	-	-
Unigene0000622	109	227.6666667	1.386	2.8776	1.1597	3.2939	3.4762	2.7224	1.807766667	3.164166667	0.807617116	0.120482041	1	no	SLC25A15	PREDICTED: mitochondrial ornithine transporter 1-like [Sinocyclocheilus grahami]	-	GO:0044425//membrane part;GO:0031224//intrinsic component of membrane;GO:0016020//membrane	-	-
Unigene0000623	122.3333333	198.6666667	3.9623	2.3856	3.2693	3.6379	5.2791	4.1073	3.205733333	4.341433333	0.437517009	0.370594618	1	no	-	--	-	-	-	-
Unigene0000624	16	20	0.681	1.2524	1.7255	1.0029	1.6394	1.1805	1.219633333	1.274266667	0.063219737	0.966915626	1	no	-	--	-	-	-	-
Unigene0000625	84.66666667	89.33333333	3.4933	1.1452	4.5444	2.1677	1.8131	3.7814	3.060966667	2.5874	-0.242484229	0.699621677	1	no	-	--	-	-	-	-
Unigene0000626	768.3333333	1018.666667	6.4761	6.0304	6.678	6.5359	6.8264	7.574	6.394833333	6.978766667	0.126065337	0.757329834	1	no	ATF7	PREDICTED: cyclic AMP-dependent transcription factor ATF-7-like isoform X2 [Sinocyclocheilus grahami]	-	-	GO:0097159//organic cyclic compound binding;GO:1901363//heterocyclic compound binding;GO:0003676//nucleic acid binding;GO:0005488//binding;GO:0001071//nucleic acid binding transcription factor activity;GO:0003677//DNA binding	GO:0097659//nucleic acid-templated transcription;GO:0006139//nucleobase-containing compound metabolic process;GO:0008152//metabolic process;GO:0016070//RNA metabolic process;GO:0009058//biosynthetic process;GO:0009987//cellular process;GO:0034645//cellular macromolecule biosynthetic process;GO:1901360//organic cyclic compound metabolic process;GO:0044238//primary metabolic process;GO:0019438//aro…
Unigene0000627	232.3333333	342	3.074	3.5677	2.7131	4.5002	3.907	3.0051	3.118266667	3.8041	0.286810862	0.528392048	1	no	plekha8	PREDICTED: pleckstrin homology domain-containing family A member 8 isoform X1 [Sinocyclocheilus rhinocerous]	-	GO:0043231//intracellular membrane-bounded organelle;GO:0043226//organelle;GO:0005623//cell;GO:0044424//intracellular part;GO:0043227//membrane-bounded organelle;GO:0044464//cell part;GO:0005622//intracellular;GO:0043229//intracellular organelle	GO:0005319//lipid transporter activity;GO:0005215//transporter activity;GO:0022892//substrate-specific transporter activity;GO:0008289//lipid binding;GO:0005488//binding	GO:0051234//establishment of localization;GO:0008104//protein localization;GO:0051179//localization;GO:0033036//macromolecule localization;GO:0045184//establishment of protein localization
Unigene0000628	79.66666667	59.33333333	4.0575	1.5193	5.2222	0.9386	1.9319	3.6518	3.599666667	2.1741	-0.727445017	0.265344819	1	no	-	--	-	-	-	-
Unigene0000629	22.66666667	22.33333333	1.616	1.7481	2.7916	0.8399	1.945	2.2409	2.0519	1.675266667	-0.292569662	0.662877115	1	no	-	--	-	-	-	-
Unigene0000630	34	38.66666667	0.6334	0.2741	1.5318	0.7864	0.8397	0.6404	0.8131	0.7555	-0.106001039	0.889306384	1	no	Myt1l	PREDICTED: myelin transcription factor 1-like protein [Sinocyclocheilus anshuiensis]	-	-	-	-
Unigene0000631	73	15	2.3527	0.589	2.0205	0	0.9498	0	1.654066667	0.3166	-2.385284222	0.05517474	1	no	-	PREDICTED: sterile alpha motif domain-containing protein 3-like [Danio rerio]	-	-	-	-
Unigene0000632	28.33333333	80.33333333	1.1971	5.0258	0	11.0242	2.537	0.9337	2.0743	4.831633333	1.219886412	0.269873134	1	no	-	--	-	-	-	-
Unigene0000633	2706.666667	2064	55.8888	34.3327	106.8784	26.0579	26.3215	67.6867	65.69996667	40.02203333	-0.715098173	0.171490247	1	no	stpg1	PREDICTED: O(6)-methylguanine-induced apoptosis 2-like [Sinocyclocheilus anshuiensis]	-	-	-	-
Unigene0000634	48.33333333	59.33333333	1.5632	0.8488	1.9942	1.2891	1.5857	1.5711	1.468733333	1.481966667	0.012940517	1	1	no	-	--	-	-	-	-
Unigene0000635	49.33333333	79.33333333	2.1857	1.9192	2.2654	3.6753	3.0679	1.7383	2.123433333	2.827166667	0.41295812	0.451277034	1	no	-	--	-	-	-	-
Unigene0000636	21.33333333	16.33333333	1.1082	0.1438	1.1486	0.4608	0.0348	0.922	0.8002	0.472533333	-0.759944526	0.431512954	1	no	-	reverse transcriptase [Danio rerio]	-	-	-	-
Unigene0000637	388.3333333	586.3333333	10.3402	7.0924	10.1085	11.2495	11.7983	11.2184	9.180366667	11.42206667	0.315200029	0.463513184	1	no	X-element\ORF2	reverse transcriptase [Danio rerio]	-	-	-	-
Unigene0000638	1307.333333	1046	7.2431	3.981	8.4766	2.3813	3.6502	6.7711	6.5669	4.267533333	-0.621810064	0.207336814	1	no	prmt8b	PREDICTED: ras and EF-hand domain-containing protein homolog [Sinocyclocheilus anshuiensis]	-	GO:0044464//cell part;GO:0016020//membrane;GO:0005622//intracellular;GO:0044424//intracellular part;GO:0005623//cell	GO:0016741//transferase activity, transferring one-carbon groups;GO:0003824//catalytic activity;GO:0016273//arginine N-methyltransferase activity;GO:0016274//protein-arginine N-methyltransferase activity;GO:0008168//methyltransferase activity;GO:0016740//transferase activity;GO:0008276//protein methyltransferase activity;GO:0008757//S-adenosylmethionine-dependent methyltransferase activity;GO:000…	GO:0036211//protein modification process;GO:0044699//single-organism process;GO:0035247//peptidyl-arginine omega-N-methylation;GO:0030182//neuron differentiation;GO:0044237//cellular metabolic process;GO:0048699//generation of neurons;GO:0022008//neurogenesis;GO:0019538//protein metabolic process;GO:0048731//system development;GO:0043414//macromolecule methylation;GO:0032501//multicellular organi…
Unigene0000639	1061	1837.666667	9.1724	10.9893	6.7093	13.4777	11.8518	13.0883	8.957	12.80593333	0.515724893	0.209451779	1	no	-	PREDICTED: uncharacterized protein LOC103912045 isoform X1 [Danio rerio]	-	-	-	-
Unigene0000640	9.333333333	11.66666667	0.6513	0.4931	0.9	0.5642	1.0224	0.5644	0.681466667	0.717	0.073330028	1	1	no	-	--	-	-	-	-
Unigene0000641	5.333333333	5.333333333	0.2605	0.1691	0.99	0.1354	0.2454	0.7451	0.4732	0.3753	-0.334405783	0.788132476	1	no	-	--	-	-	-	-
Unigene0000642	132	110	2.37	1.2463	3.3171	1.2138	0.7821	2.5908	2.311133333	1.5289	-0.596106446	0.318582465	1	no	-	hypothetical protein cypCar_00008992 [Cyprinus carpio]	-	-	-	-
Unigene0000643	69	57	1.3421	2.1777	2.6895	2.2555	1.517	0.4653	2.069766667	1.4126	-0.551115134	0.390876206	1	no	-	--	-	-	-	-
Unigene0000644	84	100.3333333	8.4079	8.1856	10.0218	12.2908	7.7216	5.9845	8.871766667	8.665633333	-0.033916229	0.959577776	1	no	-	--	-	-	-	-
Unigene0000645	24.33333333	21	0.9256	1.5249	2.8041	0.6661	1.14	1.8882	1.751533333	1.231433333	-0.508279918	0.470962178	1	no	-	--	-	-	-	-
Unigene0000646	17.66666667	17.33333333	1.1472	0.9226	0.5687	0.8166	0.8457	0.5058	0.8795	0.7227	-0.283286683	0.69920919	1	no	-	--	-	-	-	-
Unigene0000647	38.33333333	65	0.8489	0.2273	1.4078	1.1747	0.6597	1.5064	0.828	1.1136	0.427528443	0.524426592	1	no	-	PREDICTED: microfibril-associated glycoprotein 4-like, partial [Sinocyclocheilus rhinocerous]	-	-	-	-
Unigene0000648	102.3333333	102.6666667	2.3781	1.3404	4.0736	2.303	1.1554	2.7532	2.597366667	2.070533333	-0.327047263	0.577759695	1	no	-	--	-	-	-	-
Unigene0000649	115.6666667	129	7.8848	8.6604	6.8453	6.0422	8.0617	7.6222	7.796833333	7.242033333	-0.106493478	0.831714963	1	no	-	--	-	-	-	-
Unigene0000650	69.33333333	59.33333333	5.3243	1.1076	3.113	3.7607	0.5572	2.0943	3.181633333	2.1374	-0.573910658	0.430455265	1	no	-	--	-	-	-	-
Unigene0000651	16.66666667	23.66666667	0.9857	0.4172	0.7551	1.136	0.7266	0.6351	0.719333333	0.832566667	0.21090534	0.760197963	1	no	-	--	-	-	-	-
Unigene0000652	135.3333333	219	2.4434	1.6425	1.8391	3.5378	2.6577	1.7131	1.975	2.6362	0.416607174	0.402330854	1	no	BTN3A2	PREDICTED: butyrophilin subfamily 1 member A1-like [Sinocyclocheilus grahami]	ko04514//Cell adhesion molecules (CAMs)//Signaling molecules and interaction//Environmental Information Processing	-	-	-
Unigene0000653	1201	1394.666667	10.6596	7.5438	6.4378	9.5891	6.6422	7.206	8.213733333	7.812433333	-0.072266136	0.864542478	1	no	Tmem65	PREDICTED: transmembrane protein 65 isoform X2 [Sinocyclocheilus anshuiensis]	-	-	-	-
Unigene0000654	51.66666667	66.33333333	0.6693	0.3989	1.076	1.0117	0.7977	0.4475	0.714733333	0.7523	0.073903017	0.91106065	1	no	TY3B-I	PREDICTED: protein turtle homolog B-like [Sinocyclocheilus anshuiensis]	-	-	-	-
Unigene0000655	172.6666667	199.3333333	1.6915	2.5911	1.8391	3.5598	1.493	0.7197	2.040566667	1.924166667	-0.084736078	0.889581076	1	no	-	PREDICTED: SLAM family member 5-like [Sinocyclocheilus anshuiensis]	-	-	-	-
Unigene0000656	8.666666667	8.333333333	0.2153	0.4193	1.2647	0.2238	0.338	0.8958	0.6331	0.485866667	-0.381872937	0.701149693	1	no	-	--	-	-	-	-
Unigene0000657	89.66666667	153.3333333	2.0044	2.3022	1.7507	3.4765	2.8002	2.2837	2.0191	2.853466667	0.499003345	0.312729466	1	no	-	--	-	-	-	-
Unigene0000658	1961.666667	2475	13.8982	13.648	17.0378	18.6448	12.9633	14.2624	14.86133333	15.29016667	0.041040575	0.917852184	1	no	set-1	PREDICTED: uncharacterized protein LOC103911548 [Danio rerio]	-	-	-	-
Unigene0000659	1358	1409.666667	22.1308	9.5962	39.2311	20.7288	25.3505	14.8155	23.6527	20.29826667	-0.220648343	0.665139265	1	no	-	PREDICTED: probable GPI-anchored adhesin-like protein PGA55 isoform X1 [Stegastes partitus]	-	-	-	-
Unigene0000660	56	60.33333333	1.04	1.845	0.9821	1.9099	1.1102	0.4326	1.289033333	1.1509	-0.163527086	0.810456579	1	no	-	--	-	-	-	-
Unigene0000661	38.66666667	28	1.2039	0.2548	1.6275	0.9182	0.3451	0.5103	1.028733333	0.5912	-0.799150883	0.269168242	1	no	-	--	-	-	-	-
Unigene0000662	493.6666667	719.3333333	4.5839	4.0548	3.5421	4.2271	5.0219	5.4402	4.060266667	4.8964	0.270146938	0.520743174	1	no	Gtpbp2	PREDICTED: GTP-binding protein 2-like [Sinocyclocheilus rhinocerous]	-	-	GO:0032550//purine ribonucleoside binding;GO:0036094//small molecule binding;GO:0032549//ribonucleoside binding;GO:0005488//binding;GO:0097367//carbohydrate derivative binding;GO:0001883//purine nucleoside binding;GO:0097159//organic cyclic compound binding;GO:1901363//heterocyclic compound binding;GO:0001882//nucleoside binding	-
Unigene0000663	1185.666667	1924	9.0563	6.0906	10.3985	10.6048	11.9533	11.5716	8.515133333	11.37656667	0.417964207	0.31050874	1	no	pol	PREDICTED: myosin-IIIa-like [Sinocyclocheilus rhinocerous]	-	-	-	-
Unigene0000664	134.6666667	274.6666667	7.7201	6.1444	9.053	11.7302	13.4819	13.3183	7.639166667	12.84346667	0.74954749	0.10846473	1	no	-	PREDICTED: receptor-type tyrosine-protein phosphatase mu-like [Sinocyclocheilus grahami]	-	-	-	-
Unigene0000665	1	0.333333333	0.2522	0	0.1307	0	0.1188	0	0.127633333	0.0396	-1.688432824	0.686215674	1	no	-	PREDICTED: receptor-type tyrosine-protein phosphatase mu-like [Sinocyclocheilus grahami]	-	-	-	-
Unigene0000666	18.66666667	19.66666667	1.2827	0.8815	2.1116	1.4707	1.4215	0.824	1.425266667	1.238733333	-0.202366225	0.786040745	1	no	-	--	-	-	-	-
Unigene0000667	9	16.33333333	0	1.2892	0.5779	0.7607	1.116	0.9786	0.622366667	0.951766667	0.612843135	0.507489841	1	no	-	--	-	-	-	-
Unigene0000668	478.3333333	735.6666667	7.5182	8.0815	7.8601	12.1171	9.0171	8.4848	7.819933333	9.873	0.336332219	0.425458513	1	no	RLN3	PREDICTED: relaxin-3-like [Sinocyclocheilus grahami]	-	-	-	-
Unigene0000669	175	226	9.0088	8.9623	7.9088	13.5866	7.6046	6.1439	8.626633333	9.1117	0.078922611	0.877857275	1	no	-	--	-	-	-	-
Unigene0000670	2900.666667	3251.666667	9.979	8.2596	11.5087	9.5733	7.8633	9.7635	9.915766667	9.0667	-0.129146773	0.73944268	1	no	RNF212B	PREDICTED: homeobox and leucine zipper protein Homez-like [Sinocyclocheilus anshuiensis]	-	-	-	-
Unigene0000671	15.66666667	20.66666667	0.6075	0.6801	0.1259	0.9235	0.4863	0.1421	0.471166667	0.5173	0.134763714	0.893212473	1	no	-	--	-	-	-	-
Unigene0000672	22.66666667	37	0.8515	0.5017	0.1626	1.0132	0.7176	0.3321	0.505266667	0.687633333	0.444594476	0.536137192	1	no	-	--	-	-	-	-
Unigene0000673	59	80.33333333	4.0937	3.6231	3.2787	4.4005	4.3233	3.677	3.665166667	4.1336	0.173519985	0.739989528	1	no	-	--	-	-	-	-
Unigene0000674	223	444.6666667	0.9399	9.3791	0.6785	13.4517	1.6125	2.6707	3.665833333	5.911633333	0.689415594	0.448152047	1	no	-	Mucin-12, partial [Columba livia]	-	-	-	-
Unigene0000675	3139.666667	3174.333333	32.4018	20.8627	35.6021	21.2909	21.2432	30.6485	29.6222	24.3942	-0.28014062	0.492995867	1	no	MAD1L1	mitotic spindle assembly checkpoint protein MAD1 [Danio rerio]	ko04110//Cell cycle//Cell growth and death//Cellular Processes;ko04914//Progesterone-mediated oocyte maturation//Endocrine system//Organismal Systems	-	-	-
Unigene0000676	32.33333333	38	1.9343	2.2694	0.5655	1.8561	2.1957	0.735	1.589733333	1.5956	0.005314245	1	1	no	-	--	-	-	-	-
Unigene0000677	9.666666667	13	0.7182	1.1363	0.7444	1.3299	0.6765	0.8404	0.8663	0.948933333	0.131440018	0.900418979	1	no	-	--	-	-	-	-
Unigene0000678	565.6666667	771.6666667	7.0026	5.1029	11.6991	8.8757	7.04	10.3294	7.934866667	8.748366667	0.140807708	0.759775332	1	no	-	--	-	-	-	-
Unigene0000679	324.6666667	352.6666667	7.791	4.2502	10.0012	5.0094	7.0855	7.5964	7.347466667	6.563766667	-0.162722955	0.73731354	1	no	-	TPA_exp: polyprotein [Danio rerio]	-	-	-	-
Unigene0000680	2591.333333	2679.333333	59.3137	68.7329	78.3262	51.4978	62.4917	62.4504	68.79093333	58.8133	-0.226075988	0.55915862	1	no	PQBP1	PREDICTED: polyglutamine-binding protein 1-like [Sinocyclocheilus anshuiensis]	ko03040//Spliceosome//Transcription//Genetic Information Processing	-	-	-
Unigene0000681	12219.33333	9871.666667	135.0263	92.8217	245.7254	60.1961	85.9988	163.1214	157.8578	103.1054333	-0.614505188	0.204126789	1	no	tacc3	PREDICTED: transforming acidic coiled-coil-containing protein 3-like isoform X1 [Sinocyclocheilus rhinocerous]	ko03013//RNA transport//Translation//Genetic Information Processing	-	-	-
Unigene0000682	28.66666667	18	3.3106	2.0293	5.3377	1.9119	1.2704	2.1998	3.5592	1.794033333	-0.988346308	0.130257813	1	no	-	--	-	-	-	-
Unigene0000683	12487.33333	15432	417.4561	786.789	429.4629	528.4334	650.268	513.6682	544.5693333	564.1232	0.050894529	0.899651656	1	no	rps27	40S ribosomal protein S27, partial [Scophthalmus maximus]	ko03010//Ribosome//Translation//Genetic Information Processing	GO:0044464//cell part;GO:0030529//intracellular ribonucleoprotein complex;GO:0005623//cell;GO:0005622//intracellular;GO:0044424//intracellular part;GO:0032991//macromolecular complex;GO:1990904//ribonucleoprotein complex	GO:0043167//ion binding;GO:0005198//structural molecule activity;GO:0043169//cation binding;GO:0005488//binding	GO:0071704//organic substance metabolic process;GO:0008152//metabolic process;GO:0010467//gene expression;GO:0043170//macromolecule metabolic process
Unigene0000684	375	427.3333333	58.3106	14.1125	51.6262	34.4993	50.6124	32.5609	41.34976667	39.2242	-0.076135166	0.889271775	1	no	LIAT1	Zgc:64189 [Danio rerio]	-	-	-	-
Unigene0000685	90.33333333	94.33333333	1.1515	0.4409	1.9713	0.696	0.6337	1.6349	1.1879	0.9882	-0.265538431	0.680109187	1	no	-	--	-	-	-	-
Unigene0000686	84.66666667	158.3333333	2.0942	2.6384	3.1282	3.0012	6.0047	3.4351	2.620266667	4.147	0.662354404	0.204314809	1	no	-	--	-	-	-	-
Unigene0000687	1335.333333	1566.333333	11.0425	9.8832	9.9171	10.2195	9.6128	9.961	10.28093333	9.9311	-0.049945813	0.899666896	1	no	CLINT1	PREDICTED: clathrin interactor 1-like isoform X1 [Cyprinus carpio]	ko04144//Endocytosis//Transport and catabolism//Cellular Processes	-	-	-
Unigene0000688	7.333333333	0.666666667	0.4671	0.1819	0.3873	0	0	0.0729	0.345433333	0.0243	-3.829379087	0.004970299	0.778186737	no	-	unnamed protein product [Oncorhynchus mykiss]	-	-	-	-
Unigene0000689	36	22.66666667	0.9085	0.8504	2.0643	0.79	0.8228	0.3816	1.2744	0.6648	-0.938825885	0.141121412	1	no	-	PREDICTED: uncharacterized protein LOC107727458 [Sinocyclocheilus rhinocerous]	-	-	-	-
Unigene0000690	2.666666667	9.666666667	0.1926	0.375	0.1996	1.2014	0.9979	0.1502	0.255733333	0.783166667	1.614679142	0.124972075	1	no	-	--	-	-	-	-
Unigene0000691	0.333333333	6	0.0571	0	0	0.267	0.4301	0.1781	0.019033333	0.291733333	3.938050087	0.006893441	0.851089211	no	-	--	-	-	-	-
Unigene0000692	69	80	2.0518	2.0501	1.4831	1.8733	1.5767	1.8742	1.861666667	1.774733333	-0.068992515	0.897794829	1	no	-	PREDICTED: HIRA-interacting protein 3-like isoform X3 [Sinocyclocheilus grahami]	-	-	-	-
Unigene0000693	15.66666667	15	0.7492	0.3647	0.6601	0.9346	0.3176	0.1169	0.591333333	0.456366667	-0.373778184	0.656818704	1	no	-	PREDICTED: putative nuclease HARBI1 [Cyprinus carpio]	-	-	-	-
Unigene0000694	12.66666667	11.66666667	0.1859	1.1761	0.3853	0.6158	0.3501	0.3624	0.582433333	0.442766667	-0.395546311	0.647412678	1	no	-	--	-	-	-	-
Unigene0000695	3791	5973.333333	31.7149	39.5848	16.9982	48.4783	35.8947	30.8815	29.43263333	38.41816667	0.384372049	0.370527434	1	no	CANX	calnexin 2 [Cyprinus carpio]	ko04141//Protein processing in endoplasmic reticulum//Folding, sorting and degradation//Genetic Information Processing;ko04145//Phagosome//Transport and catabolism//Cellular Processes	GO:0005622//intracellular;GO:0043231//intracellular membrane-bounded organelle;GO:0043229//intracellular organelle;GO:0044424//intracellular part;GO:0043227//membrane-bounded organelle;GO:0044464//cell part;GO:0043226//organelle;GO:0005623//cell	GO:0003824//catalytic activity;GO:0004197//cysteine-type endopeptidase activity;GO:0016787//hydrolase activity;GO:0008234//cysteine-type peptidase activity;GO:0005488//binding;GO:0070011//peptidase activity, acting on L-amino acid peptides;GO:0008233//peptidase activity;GO:0004175//endopeptidase activity;GO:0005515//protein binding	GO:0044238//primary metabolic process;GO:0008152//metabolic process;GO:0044237//cellular metabolic process;GO:0044260//cellular macromolecule metabolic process;GO:0043170//macromolecule metabolic process;GO:0051604//protein maturation;GO:0019538//protein metabolic process;GO:0016485//protein processing;GO:0071704//organic substance metabolic process;GO:0010467//gene expression;GO:0006508//proteol…
Unigene0000696	66	267.6666667	1.3138	0.4901	0.6363	5.8586	0.7286	1.2259	0.8134	2.604366667	1.678895683	0.022521131	1	no	SLC25A29	PREDICTED: mitochondrial basic amino acids transporter-like isoform X1 [Cyprinus carpio]	-	-	-	-
Unigene0000697	18.33333333	76	0.1388	0.4393	1.3672	2.6792	0.1308	3.3845	0.648433333	2.064833333	1.670995176	0.082570186	1	no	-	vacuolar protein sorting 52 [Salmo salar]	-	-	-	-
Unigene0000698	350.6666667	422	4.423	3.4119	3.2933	3.1026	3.828	4.1499	3.7094	3.6935	-0.00619727	0.990815983	1	no	-	--	-	-	-	-
Unigene0000699	22.66666667	30.66666667	2.2261	0.8891	0.7691	1.2015	0.6452	2.3597	1.294766667	1.402133333	0.114931417	0.893284412	1	no	-	--	-	-	-	-
Unigene0000700	363.3333333	376.3333333	7.8693	8.3315	10.7562	5.3299	8.4083	9.3607	8.985666667	7.699633333	-0.2228358	0.624612032	1	no	STK19	PREDICTED: serine/threonine-protein kinase 19 isoform X2 [Sinocyclocheilus grahami]	-	-	-	-
Unigene0000701	6	15	0.2296	0.2236	0.9521	1.1339	0.5047	1.1344	0.468433333	0.924333333	0.98056947	0.240823359	1	no	-	--	-	-	-	-
Unigene0000702	112.6666667	231	1.8955	1.1881	1.3187	2.9556	2.5681	1.9342	1.467433333	2.485966667	0.76051199	0.11958833	1	no	pol	PREDICTED: uncharacterized protein LOC108184914 [Danio rerio]	-	-	-	-
Unigene0000703	19	46.33333333	0.8149	0.5049	0.8063	2.1659	0.9769	1.0402	0.7087	1.394333333	0.976328543	0.115332006	1	no	PEG10	Retrotransposable element Tf2 protein type 1 [Larimichthys crocea]	ko03410//Base excision repair//Replication and repair//Genetic Information Processing	-	-	-
Unigene0000704	6.333333333	16	0.5327	0.7409	0.1578	1.5427	0.9319	0.5343	0.477133333	1.002966667	1.071809275	0.208866045	1	no	-	--	-	-	-	-
Unigene0000705	527.6666667	338	5.9529	2.5087	13.7684	1.8049	2.4791	7.0403	7.41	3.774766667	-0.973086074	0.134553955	1	no	efhc2	PREDICTED: EF-hand domain-containing family member C2-like isoform X1 [Sinocyclocheilus rhinocerous]	-	-	GO:0046872//metal ion binding;GO:0005488//binding;GO:0043169//cation binding;GO:0043167//ion binding	-
Unigene0000706	149.6666667	253.3333333	2.5083	1.8158	1.4532	3.0888	2.5444	2.4281	1.925766667	2.6871	0.480617101	0.312272248	1	no	-	--	-	-	-	-
Unigene0000707	35	58	1.0198	0.9628	1.2813	1.783	0.786	1.7597	1.087966667	1.4429	0.407336962	0.483366206	1	no	-	--	-	-	-	-
Unigene0000708	21.33333333	27.66666667	1.7826	0.7438	2.9915	1.6545	2.1589	2.0526	1.8393	1.955333333	0.08825776	0.903257224	1	no	-	--	-	-	-	-
Unigene0000709	62.66666667	52	2.1978	1.6522	1.3841	1.1929	1.3102	1.1067	1.7447	1.203266667	-0.536022581	0.31422288	1	no	-	--	-	-	-	-
Unigene0000710	44.66666667	55.66666667	0.5821	0.644	2.3859	0.5982	1.271	1.7955	1.204	1.221566667	0.020897208	0.977531287	1	no	-	PREDICTED: protein MAATS1 isoform X1 [Danio rerio]	-	-	GO:0097159//organic cyclic compound binding;GO:0005488//binding	GO:1901360//organic cyclic compound metabolic process;GO:0008152//metabolic process;GO:0006259//DNA metabolic process;GO:0044260//cellular macromolecule metabolic process;GO:0034641//cellular nitrogen compound metabolic process;GO:0071704//organic substance metabolic process;GO:0043170//macromolecule metabolic process;GO:0009987//cellular process;GO:0006725//cellular aromatic compound metabolic p…
Unigene0000711	14.66666667	11	1.9069	1.1345	1.6471	0.8259	0.7983	1.2395	1.562833333	0.954566667	-0.711246068	0.336266367	1	no	-	--	-	-	-	-
Unigene0000712	3320	3846	65.1815	64.8218	70.0907	39.9081	72.9927	79.793	66.698	64.23126667	-0.054367754	0.894111371	1	no	sap30l	PREDICTED: histone deacetylase complex subunit SAP30L [Cyprinus carpio]	-	GO:0043226//organelle;GO:0043231//intracellular membrane-bounded organelle;GO:0044424//intracellular part;GO:0005623//cell;GO:0043227//membrane-bounded organelle;GO:0043229//intracellular organelle;GO:0044464//cell part;GO:0005622//intracellular	GO:0043169//cation binding;GO:0005488//binding;GO:0043167//ion binding	GO:0018130//heterocycle biosynthetic process;GO:0044260//cellular macromolecule metabolic process;GO:0006807//nitrogen compound metabolic process;GO:0044237//cellular metabolic process;GO:1901576//organic substance biosynthetic process;GO:0016070//RNA metabolic process;GO:0044271//cellular nitrogen compound biosynthetic process;GO:0044238//primary metabolic process;GO:0046483//heterocycle metabol…
Unigene0000713	14	17.66666667	1.1035	1.4325	1.3344	1.5056	0.9528	1.5064	1.290133333	1.3216	0.034765418	1	1	no	-	PREDICTED: zinc finger BED domain-containing protein 5-like [Larimichthys crocea]	-	-	-	-
Unigene0000714	36.66666667	36.33333333	1.3462	0.5983	1.3043	1.0267	0.7994	0.799	1.082933333	0.875033333	-0.307534551	0.600299544	1	no	-	--	-	-	-	-
Unigene0000715	83.33333333	117.6666667	1.2098	2.0373	0.8134	1.8099	1.6015	1.3645	1.3535	1.591966667	0.234115241	0.665754182	1	no	-	--	-	-	-	-
Unigene0000716	36.66666667	28.66666667	1.9886	2.64	0.2811	0.6695	0.596	1.8685	1.636566667	1.044666667	-0.647629694	0.412756651	1	no	-	--	-	-	-	-
Unigene0000717	38.33333333	87	1.2228	1.3066	0.8965	2.2555	2.0508	2.1171	1.141966667	2.141133333	0.906854099	0.085161656	1	no	-	PREDICTED: muscle M-line assembly protein unc-89-like [Sinocyclocheilus rhinocerous]	-	-	-	-
Unigene0000718	51	63.66666667	0.7561	1.4142	0.8662	0.7757	1.6306	0.8381	1.012166667	1.081466667	0.09554233	0.882767089	1	no	-	--	-	-	-	-
Unigene0000719	497.3333333	725.6666667	4.2395	2.1004	3.9611	4.3785	3.4385	4.4021	3.433666667	4.073033333	0.246353629	0.583489658	1	no	-	PREDICTED: uncharacterized protein LOC107591874 [Sinocyclocheilus grahami]	-	-	-	-
Unigene0000720	385	425	12.4108	8.4703	16.411	8.8031	12.9555	12.2755	12.4307	11.3447	-0.131889081	0.775086539	1	no	-	--	-	-	-	-
Unigene0000721	77	215.3333333	0.9072	1.567	0.8948	3.2969	1.9709	2.4425	1.123	2.5701	1.194466567	0.020490512	1	no	PEG10	Retrotransposable element Tf2 protein type 1 [Larimichthys crocea]	-	-	-	-
Unigene0000722	18	24.33333333	0.9865	1.256	1.8878	1.3016	3.1452	0.4144	1.376766667	1.6204	0.235065917	0.786515474	1	no	-	--	-	-	-	-
Unigene0000723	244.3333333	309.3333333	11.9415	9.9067	12.3771	12.1718	12.0358	11.4892	11.40843333	11.89893333	0.060731564	0.893061718	1	no	-	--	-	-	-	-
Unigene0000724	31.66666667	29.66666667	0.9372	1.8249	0.5037	1.2178	0.5231	0.7581	1.0886	0.833	-0.38608554	0.574454811	1	no	-	--	-	-	-	-
Unigene0000725	80.66666667	133.3333333	7.2405	3.1535	5.0689	5.8925	7.8969	7.3817	5.1543	7.057033333	0.453285314	0.391658916	1	no	-	--	-	-	-	-
Unigene0000726	26.33333333	23.33333333	0.7653	0.4524	0.9632	0.5114	0.5664	0.5117	0.726966667	0.529833333	-0.456350604	0.476235636	1	no	-	PREDICTED: mucin-19-like [Sinocyclocheilus anshuiensis]	-	-	-	-
Unigene0000727	39.66666667	44.66666667	0.8085	1.1688	0.9396	0.9933	0.5077	1.1466	0.9723	0.882533333	-0.139750751	0.838104842	1	no	KCNH7	PREDICTED: potassium voltage-gated channel subfamily H member 2-like [Sinocyclocheilus rhinocerous]	-	-	-	-
Unigene0000728	21	31.33333333	0.9967	1.8021	1.6972	1.6652	2.146	1.7771	1.498666667	1.862766667	0.313767436	0.6086618	1	no	-	--	-	-	-	-
Unigene0000729	9.333333333	25.33333333	0.5272	0.2717	0.0643	0.0242	1.11	0.8951	0.287733333	0.676433333	1.233215391	0.23472811	1	no	-	--	-	-	-	-
Unigene0000730	1411	2286.666667	6.9661	6.8708	5.5063	9.815	9.311	6.9124	6.447733333	8.679466667	0.428814317	0.284759461	1	no	Map4	PREDICTED: microtubule-associated protein 4-like isoform X3 [Sinocyclocheilus grahami]	-	-	-	-
Unigene0000731	284	527	3.8583	7.2491	4.2046	9.7972	7.5231	6.2018	5.104	7.8407	0.619354132	0.184942125	1	no	ICOSLG	PREDICTED: CD276 antigen homolog [Sinocyclocheilus anshuiensis]	-	-	-	-
Unigene0000732	26.66666667	68.33333333	1.5663	1.4556	2.7304	4.6626	5.432	2.2214	1.917433333	4.105333333	1.098322949	0.068316018	1	no	-	PREDICTED: CXADR-like membrane protein [Cyprinus carpio]	-	-	-	-
Unigene0000733	18.33333333	30.66666667	1.4209	0.3873	1.3549	3.279	0.4283	0.4433	1.054366667	1.383533333	0.391980737	0.660855972	1	no	-	--	-	-	-	-
Unigene0000734	12	12.66666667	1.2472	0.6428	0.7604	0.6292	0.8293	0.8584	0.883466667	0.7723	-0.194014331	0.817746049	1	no	-	--	-	-	-	-
Unigene0000735	4	5	0.3766	0.3666	0	0.3425	0.1182	0.2937	0.247733333	0.251466667	0.021579174	1	1	no	-	PREDICTED: zinc finger protein 2-like isoform X1 [Sinocyclocheilus anshuiensis]	-	-	-	-
Unigene0000736	36.66666667	45.66666667	3.4492	1.7989	1.5322	2.449	0.9283	3.363	2.2601	2.246766667	-0.008536303	1	1	no	-	--	-	-	-	-
Unigene0000737	7.333333333	3.333333333	0	0.2043	0.3141	0	0.2196	0	0.1728	0.0732	-1.239187664	0.430276411	1	no	-	PREDICTED: E3 ubiquitin-protein ligase RNF213 isoform X3 [Salmo salar]	-	-	-	-
Unigene0000738	106.3333333	146.6666667	0.9025	0.9505	0.7654	1.5672	0.711	0.6592	0.8728	0.979133333	0.16585423	0.761881801	1	no	Flt3	PREDICTED: receptor-type tyrosine-protein kinase FLT3-like [Sinocyclocheilus grahami]	ko04060//Cytokine-cytokine receptor interaction//Signaling molecules and interaction//Environmental Information Processing	-	-	-
Unigene0000739	760	1157.333333	4.8093	5.9079	3.2404	6.3641	6.6359	4.7718	4.652533333	5.923933333	0.348538918	0.421058888	1	no	CNNM2	PREDICTED: metal transporter CNNM2-like isoform X1 [Sinocyclocheilus grahami]	-	-	-	-
Unigene0000740	8.333333333	9.333333333	1.516	0.5209	0.1849	0.0695	1.7639	0.4173	0.7406	0.750233333	0.018644815	1	1	no	Slc26a4	PREDICTED: pendrin-like [Sinocyclocheilus rhinocerous]	-	GO:0044425//membrane part;GO:0016020//membrane;GO:0031224//intrinsic component of membrane	GO:0022857//transmembrane transporter activity;GO:0005215//transporter activity;GO:0015075//ion transmembrane transporter activity;GO:0022891//substrate-specific transmembrane transporter activity;GO:0022892//substrate-specific transporter activity;GO:0015103//inorganic anion transmembrane transporter activity;GO:0008509//anion transmembrane transporter activity	GO:0048878//chemical homeostasis;GO:0051179//localization;GO:0006811//ion transport;GO:0006820//anion transport;GO:0006950//response to stress;GO:0042592//homeostatic process;GO:0015698//inorganic anion transport;GO:0044763//single-organism cellular process;GO:0065007//biological regulation;GO:0006810//transport;GO:0044699//single-organism process;GO:0009987//cellular process;GO:0009628//response…
Unigene0000741	322.6666667	322	3.6299	5.4972	2.6476	3.1063	4.3631	2.4882	3.9249	3.3192	-0.241820335	0.614229873	1	no	STEAP3	PREDICTED: metalloreductase STEAP3-like [Sinocyclocheilus anshuiensis]	ko04115//p53 signaling pathway//Cell growth and death//Cellular Processes	-	-	-
Unigene0000742	37.33333333	91.66666667	1.7963	2.2775	0.5629	4.4294	3.1479	1.9225	1.545566667	3.1666	1.034798755	0.102184291	1	no	-	--	-	-	-	-
Unigene0000743	25	50.66666667	0.5867	1.9583	0.5647	1.4049	2.2105	1.7325	1.036566667	1.782633333	0.782197082	0.227023395	1	no	-	PREDICTED: mucin-5AC [Danio rerio]	-	-	-	-
Unigene0000744	34.33333333	56.66666667	0.4204	1.0914	0.5395	0.874	0.924	1.015	0.683766667	0.937666667	0.455571053	0.435174758	1	no	-	PREDICTED: mucin-17-like [Cyprinus carpio]	-	-	-	-
Unigene0000745	8.333333333	10	0.4598	1.1639	0.6672	1.0038	1.0395	0.2869	0.763633333	0.776733333	0.024539301	1	1	no	-	--	-	-	-	-
Unigene0000746	0	0.666666667	0	0	0	0.1053	0	0	0.001	0.0351	5.133399125	0.555977401	1	no	C7orf55	PREDICTED: UPF0562 protein C7orf55 homolog [Danio rerio]	-	-	-	-
Unigene0000747	2.666666667	8.333333333	0.0595	0.2318	0.1851	0.6032	0.1682	0.4178	0.1588	0.3964	1.31974605	0.19991638	1	no	-	--	-	-	-	-
Unigene0000748	7.666666667	7	0.966	0.4702	0.4172	0.1883	0.3791	0.8163	0.6178	0.461233333	-0.421643091	0.692948769	1	no	-	--	-	-	-	-
Unigene0000749	32.33333333	40.33333333	1.3256	0.6848	0.6169	1.0124	0.739	0.9285	0.875766667	0.8933	0.028598223	0.96295481	1	no	-	PREDICTED: low density lipoprotein receptor adapter protein 1-like isoform X1 [Sinocyclocheilus grahami]	-	-	-	-
Unigene0000750	37.33333333	38.33333333	3.3652	2.0628	1.5502	2.2349	2.1718	1.5555	2.326066667	1.9874	-0.227010176	0.70659836	1	no	Tuba1b	PREDICTED: tubulin alpha chain-like [Peromyscus maniculatus bairdii]	ko04145//Phagosome//Transport and catabolism//Cellular Processes;ko04540//Gap junction//Cellular commiunity//Cellular Processes	GO:0043227//membrane-bounded organelle;GO:0044464//cell part;GO:0031988//membrane-bounded vesicle;GO:0043226//organelle;GO:0043228//non-membrane-bounded organelle;GO:0044430//cytoskeletal part;GO:0044422//organelle part;GO:0043231//intracellular membrane-bounded organelle;GO:0005623//cell;GO:0031982//vesicle;GO:0099513//polymeric cytoskeletal fiber;GO:0043232//intracellular non-membrane-bounded o…	GO:0001883//purine nucleoside binding;GO:1901363//heterocyclic compound binding;GO:0016817//hydrolase activity, acting on acid anhydrides;GO:0032550//purine ribonucleoside binding;GO:0032549//ribonucleoside binding;GO:0005198//structural molecule activity;GO:0017111//nucleoside-triphosphatase activity;GO:0097367//carbohydrate derivative binding;GO:0016818//hydrolase activity, acting on acid anhyd…	GO:0070670//response to interleukin-4;GO:0009259//ribonucleotide metabolic process;GO:1901565//organonitrogen compound catabolic process;GO:0006725//cellular aromatic compound metabolic process;GO:0009154//purine ribonucleotide catabolic process;GO:1901361//organic cyclic compound catabolic process;GO:0006793//phosphorus metabolic process;GO:1901136//carbohydrate derivative catabolic process;GO:0…
Unigene0000751	8.333333333	5	1.1297	1.3442	0.6505	0.7829	0.2365	0.4895	1.041466667	0.502966667	-1.050081969	0.233579224	1	no	-	--	-	-	-	-
Unigene0000752	55.66666667	73.66666667	5.6097	5.9089	3.8127	5.3772	5.717	5.7385	5.110433333	5.6109	0.134786573	0.804661729	1	no	-	--	-	-	-	-
Unigene0000753	28	11.33333333	1.8572	2.6728	2.2597	0.9443	0.9887	0.3779	2.263233333	0.7703	-1.554893	0.017847636	1	no	-	--	-	-	-	-
Unigene0000754	0.666666667	0	0.2216	0	0	0	0	0	0.073866667	0.001	-6.20685157	0.558278425	1	no	-	--	-	-	-	-
Unigene0000755	24	38.33333333	0.9316	1.6844	0.5518	0.6226	1.8804	1.7994	1.055933333	1.434133333	0.441660407	0.518436809	1	no	-	--	-	-	-	-
Unigene0000756	24	23	1.8918	1.1432	1.6903	1.0172	1.3518	1.3739	1.5751	1.247633333	-0.336249422	0.604064051	1	no	-	--	-	-	-	-
Unigene0000757	4	3.333333333	0.1926	0.5626	0.3993	0	0.7257	0.1502	0.384833333	0.291966667	-0.398430099	0.825970475	1	no	-	--	-	-	-	-
Unigene0000758	33.66666667	38.66666667	1.2872	1.6709	0.9703	0.9427	1.6166	1.2474	1.309466667	1.2689	-0.045400958	0.962513307	1	no	-	--	-	-	-	-
Unigene0000759	25.33333333	51	1.5383	1.758	1.8023	2.7114	3.1499	2.6606	1.699533333	2.840633333	0.741073964	0.182559942	1	no	-	--	-	-	-	-
Unigene0000760	72.33333333	76.33333333	2.5813	1.0559	1.0792	1.1331	1.5732	1.4382	1.572133333	1.3815	-0.186488016	0.745883653	1	no	NT5C1A	PREDICTED: cytosolic 5'-nucleotidase 1A-like isoform X2 [Latimeria chalumnae]	ko01100//Metabolic pathways//Global and Overview//Metabolism;ko01110//Biosynthesis of secondary metabolites//Global and Overview//Metabolism;ko00230//Purine metabolism//Nucleotide metabolism//Metabolism;ko00240//Pyrimidine metabolism//Nucleotide metabolism//Metabolism;ko00760//Nicotinate and nicotinamide metabolism//Metabolism of cofactors and vitamins//Metabolism	-	-	-
Unigene0000761	8.666666667	4.666666667	1.2675	0.1948	0.2766	0.3121	0.1257	0.3122	0.579633333	0.25	-1.213212468	0.231484601	1	no	-	--	-	-	-	-
Unigene0000762	40	24	3.2269	1.6597	2.4611	0.7595	0.7455	2.0421	2.449233333	1.182366667	-1.05065272	0.105364225	1	no	-	--	-	-	-	-
Unigene0000763	20	17.66666667	2.303	0.9809	1.0443	1.0661	0.4067	1.5719	1.442733333	1.0149	-0.507467082	0.481108247	1	no	-	--	-	-	-	-
Unigene0000764	202	262.3333333	4.771	3.5573	5.8858	5.2257	4.7351	5.1375	4.738033333	5.032766667	0.087063364	0.852715272	1	no	-	--	-	-	-	-
Unigene0000765	26.66666667	23	1.6133	0.6544	1.347	0.7686	0.4221	1.2934	1.2049	0.828033333	-0.541152665	0.437721603	1	no	Znf354c	PREDICTED: gastrula zinc finger protein XlCGF49.1-like [Sinocyclocheilus rhinocerous]	-	-	-	-
Unigene0000766	14	13.66666667	1.1449	0.966	1.1075	0.9521	1.0065	0.6549	1.0728	0.871166667	-0.300360484	0.662032165	1	no	-	--	-	-	-	-
Unigene0000767	53.33333333	62.33333333	2.0564	1.7259	1.9109	1.8797	1.5362	2.0189	1.897733333	1.8116	-0.067012837	0.909452804	1	no	-	--	-	-	-	-
Unigene0000768	6.666666667	9.666666667	0.3166	0.2055	1.6405	0.7404	1.2921	0.5761	0.720866667	0.869533333	0.270508894	0.791455218	1	no	-	Nipped-B-like B, partial [Nestor notabilis]	-	-	-	-
Unigene0000769	35	45.33333333	4.5188	4.6437	4.0331	4.4037	2.0099	7.2452	4.398533333	4.552933333	0.04977379	0.951091128	1	no	-	--	-	-	-	-
Unigene0000770	18.33333333	15.33333333	1.1162	0.6915	0.9992	0.4747	0.4779	0.9498	0.935633333	0.634133333	-0.561157046	0.400648465	1	no	-	--	-	-	-	-
Unigene0000771	7.333333333	2	1.0689	0.5781	0.9848	0.0926	0	0.4632	0.877266667	0.185266667	-2.243412118	0.042185952	1	no	-	--	-	-	-	-
Unigene0000772	174	347	8.0343	7.075	5.984	15.2346	11.7889	7.7785	7.0311	11.60066667	0.722385398	0.130110684	1	no	-	PREDICTED: cytochrome c oxidase copper chaperone [Anolis carolinensis]	ko01100//Metabolic pathways//Global and Overview//Metabolism;ko00190//Oxidative phosphorylation//Energy metabolism//Metabolism	-	-	-
Unigene0000773	10.33333333	51.33333333	0.6879	0.4688	0.9982	7.6695	0.1944	0.4293	0.7183	2.7644	1.944307964	0.065101433	1	no	-	--	-	-	-	-
Unigene0000774	9.333333333	16.66666667	0.4295	0.3833	0.1855	0.6418	0.6068	0.2513	0.332766667	0.499966667	0.587320986	0.454849174	1	no	-	PREDICTED: E3 ubiquitin-protein ligase CBL-like [Sinocyclocheilus anshuiensis]	-	GO:0005623//cell;GO:0005622//intracellular;GO:0043227//membrane-bounded organelle;GO:0043231//intracellular membrane-bounded organelle;GO:0044464//cell part;GO:0044424//intracellular part;GO:0043229//intracellular organelle;GO:0043226//organelle	GO:0019787//ubiquitin-like protein transferase activity;GO:0045309//protein phosphorylated amino acid binding;GO:0043167//ion binding;GO:0043169//cation binding;GO:0005515//protein binding;GO:0005488//binding;GO:0016740//transferase activity;GO:0046914//transition metal ion binding;GO:0046872//metal ion binding;GO:0003824//catalytic activity;GO:0051219//phosphoprotein binding	GO:0009987//cellular process;GO:0051716//cellular response to stimulus;GO:0050794//regulation of cellular process;GO:0044700//single organism signaling;GO:0044763//single-organism cellular process;GO:0065007//biological regulation;GO:0007165//signal transduction;GO:0050789//regulation of biological process;GO:0044699//single-organism process;GO:0050896//response to stimulus;GO:0023052//signaling;…
Unigene0000775	18.66666667	11.66666667	0.7476	1.3516	0.8855	1.0824	0	0.3749	0.9949	0.485766667	-1.034288028	0.272063054	1	no	-	--	-	-	-	-
Unigene0000776	74.66666667	145.6666667	0.8329	0.9649	0.5573	1.3645	1.5294	0.9622	0.785033333	1.285366667	0.711354146	0.166847478	1	no	SLC5A5	PREDICTED: sodium/iodide cotransporter [Sinocyclocheilus grahami]	-	GO:0044425//membrane part;GO:0016020//membrane;GO:0031224//intrinsic component of membrane	-	GO:0044699//single-organism process;GO:0009987//cellular process;GO:0044763//single-organism cellular process
Unigene0000777	796.3333333	933.3333333	17.8004	38.257	17.0772	25.1625	25.498	20.971	24.3782	23.87716667	-0.029959954	0.948747091	1	no	LAMP1	--	ko04145//Phagosome//Transport and catabolism//Cellular Processes;ko04142//Lysosome//Transport and catabolism//Cellular Processes	-	-	-
Unigene0000778	1826.333333	2495.666667	22.9769	37.7382	18.3308	29.0346	37.7412	24.3563	26.34863333	30.37736667	0.205268679	0.633763753	1	no	LAMP1	PREDICTED: lysosome-associated membrane glycoprotein 1-like [Sinocyclocheilus anshuiensis]	ko04145//Phagosome//Transport and catabolism//Cellular Processes;ko04142//Lysosome//Transport and catabolism//Cellular Processes	-	-	-
Unigene0000779	13.33333333	24.66666667	0.9737	0.7584	0.8747	1.7713	1.284	0.9114	0.868933333	1.322233333	0.605659391	0.352145764	1	no	-	--	-	-	-	-
Unigene0000780	1	4	0.2768	0	0	0.5756	0.2608	0.072	0.092266667	0.3028	1.714483763	0.253434944	1	no	zgc:103499	--	-	-	-	-
Unigene0000781	141.3333333	178.3333333	18.9646	6.0482	21.8028	4.3337	10.6768	32.3058	15.6052	15.7721	0.015347915	0.986050862	1	no	-	--	-	-	-	-
Unigene0000782	1173	1562.333333	26.8321	28.8254	20.6165	22.9147	33.7733	28.4079	25.42466667	28.3653	0.157898263	0.701531566	1	no	zgc:162885	PREDICTED: mitochondrial inner membrane protease ATP23 homolog isoform X1 [Sinocyclocheilus grahami]	-	-	GO:0008233//peptidase activity;GO:0070011//peptidase activity, acting on L-amino acid peptides;GO:0043169//cation binding;GO:0004175//endopeptidase activity;GO:0005488//binding;GO:0016787//hydrolase activity;GO:0003824//catalytic activity;GO:0043167//ion binding	GO:0010467//gene expression;GO:0071704//organic substance metabolic process;GO:0043170//macromolecule metabolic process;GO:0008152//metabolic process;GO:0044238//primary metabolic process;GO:0006508//proteolysis;GO:0016485//protein processing;GO:0051604//protein maturation;GO:0019538//protein metabolic process
Unigene0000783	707.6666667	1078	4.9606	4.5543	4.4674	6.4031	5.9907	5.207	4.660766667	5.866933333	0.33203931	0.416842481	1	no	PACS2	PREDICTED: phosphofurin acidic cluster sorting protein 2-like isoform X2 [Sinocyclocheilus anshuiensis]	-	-	-	-
Unigene0000784	8.333333333	9	0.5869	1	0.2281	0.4004	0.691	0.5723	0.605	0.554566667	-0.125574239	0.943071572	1	no	-	--	-	-	-	-
Unigene0000785	18.33333333	20.33333333	0.8389	0.1945	1.2007	0.4672	0.5644	0.9659	0.7447	0.665833333	-0.16149826	0.863560702	1	no	-	--	-	-	-	-
Unigene0000786	42.66666667	38.66666667	1.7367	1.7676	1.5546	1.3848	1.2269	1.1699	1.6863	1.260533333	-0.419826952	0.449267943	1	no	-	PREDICTED: S-antigen protein-like [Cavia porcellus]	-	-	-	-
Unigene0000787	90.33333333	102.3333333	3.8823	6.7309	3.7483	5.4317	5.6606	2.6135	4.787166667	4.5686	-0.067419901	0.90470656	1	no	-	--	-	-	-	-
Unigene0000788	27.33333333	50	0.9742	1.1592	0.8228	2.5881	1.4615	0.4222	0.9854	1.4906	0.597111788	0.383820589	1	no	-	PREDICTED: homeobox expressed in ES cells 1-A-like [Sinocyclocheilus anshuiensis]	-	-	-	-
Unigene0000789	1.333333333	5.333333333	0	0	0.2652	0.1995	0.1205	0.499	0.0884	0.273	1.626782676	0.30632036	1	no	-	PREDICTED: IgGFc-binding protein-like [Cyprinus carpio]	-	-	-	-
Unigene0000790	64.33333333	119.3333333	1.3816	1.2002	1.5422	1.5578	1.9421	2.7689	1.374666667	2.0896	0.60414497	0.24666583	1	no	pol	PREDICTED: uncharacterized protein LOC109098236 [Cyprinus carpio]	-	-	-	-
Unigene0000791	1030.333333	1754	4.7453	4.5938	7.3499	4.8479	9.5499	9.2244	5.563	7.874066667	0.501245822	0.259730529	1	no	pol	PREDICTED: uncharacterized protein LOC109070003 [Cyprinus carpio]	-	-	-	-
Unigene0000792	89.33333333	79.33333333	1.1003	2.5045	0.4979	0.7974	1.8539	0.544	1.367566667	1.0651	-0.360622275	0.597929476	1	no	inaW	PREDICTED: extensin-1-like [Nannospalax galili]	-	-	-	-
Unigene0000793	14.33333333	16.66666667	0.711	1.5575	1.566	0.5543	2.0091	1.2478	1.278166667	1.2704	-0.008793151	1	1	no	-	--	-	-	-	-
Unigene0000794	44	47.33333333	2.2961	3.327	1.3836	1.8317	3.3195	1.3328	2.335566667	2.161333333	-0.111851036	0.861693605	1	no	hba1	PREDICTED: hemoglobin embryonic subunit alpha-like [Sinocyclocheilus rhinocerous]	-	GO:0032991//macromolecular complex;GO:0043234//protein complex	GO:0022892//substrate-specific transporter activity;GO:0005215//transporter activity;GO:0046906//tetrapyrrole binding;GO:0046872//metal ion binding;GO:0043167//ion binding;GO:1901363//heterocyclic compound binding;GO:0005488//binding;GO:0097159//organic cyclic compound binding;GO:0046914//transition metal ion binding;GO:0043169//cation binding	GO:1902578//single-organism localization;GO:0044765//single-organism transport;GO:0051234//establishment of localization;GO:0006810//transport;GO:0015669//gas transport;GO:0044699//single-organism process;GO:0051179//localization
Unigene0000795	579.3333333	642	8.8229	10.9336	8.3241	8.6802	10.0153	7.298	9.3602	8.6645	-0.111422858	0.792638563	1	no	-	--	-	-	-	-
Unigene0000796	0.333333333	1.666666667	0.1157	0	0	0	0.4358	0.0902	0.038566667	0.175333333	2.184673935	0.366342705	1	no	-	--	-	-	-	-
Unigene0000797	228.3333333	286.6666667	1.469	4.4053	1.4003	3.3773	2.121	2.0575	2.424866667	2.5186	0.054716592	0.92275355	1	no	-	--	-	-	-	-
Unigene0000798	291.3333333	152.6666667	9.4932	8.7387	14.319	3.571	6.0193	4.6389	10.8503	4.743066667	-1.193842881	0.014109333	1	no	-	PREDICTED: uncharacterized protein LOC109201215 isoform X3 [Oreochromis niloticus]	-	-	-	-
Unigene0000799	448	526	3.3731	3.6487	2.8563	4.0678	2.755	2.6941	3.2927	3.1723	-0.053741862	0.903447169	1	no	abhd11	PREDICTED: protein ABHD11 isoform X1 [Sinocyclocheilus anshuiensis]	-	-	-	-
Unigene0000800	62.33333333	68.66666667	0.6445	0.715	1.4759	0.6077	0.72	1.2042	0.945133333	0.843966667	-0.163331851	0.786689879	1	no	-	pol-like protein [Danio rerio]	-	-	-	-
Unigene0000801	25.66666667	26.66666667	1.4279	0.852	1.289	1.0055	0.7376	1.2575	1.189633333	1.0002	-0.250228467	0.682150009	1	no	-	--	-	-	-	-
Unigene0000802	1.333333333	3	0	0.0684	0.0728	0.0274	0.2647	0	0.047066667	0.097366667	1.04872227	0.540785861	1	no	-	PREDICTED: zonadhesin-like [Sinocyclocheilus grahami]	-	-	-	-
Unigene0000803	0.666666667	0.666666667	0	0	0.156	0.1173	0	0	0.052	0.0391	-0.411343016	1	1	no	-	PREDICTED: zonadhesin-like [Sinocyclocheilus grahami]	-	-	-	-
Unigene0000804	0	0	0	0	0	0	0	0	0.001	0.001	0	notest	notest	notest	-	PREDICTED: zonadhesin-like [Sinocyclocheilus grahami]	-	-	-	-
Unigene0000805	0.666666667	2.666666667	0	0	0.0804	0.2419	0	0	0.0268	0.080633333	1.589143363	0.470508514	1	no	-	PREDICTED: zonadhesin-like [Sinocyclocheilus grahami]	-	-	-	-
Unigene0000806	2068.333333	2236.666667	9.9767	8.4755	10.5771	9.1066	7.7441	8.8423	9.676433333	8.564333333	-0.17613443	0.650351291	1	no	C2CD2	PREDICTED: C2 domain-containing protein 2-like isoform X2 [Sinocyclocheilus rhinocerous]	-	-	-	-
Unigene0000807	49	67.66666667	3.2588	1.7305	3.8075	3.1874	3.0695	3.6511	2.932266667	3.302666667	0.171615057	0.770372261	1	no	-	--	-	-	-	-
Unigene0000808	23	19.66666667	0.8195	0.9429	0.8108	0.4356	0.6316	0.7555	0.857733333	0.607566667	-0.497486467	0.404791261	1	no	-	PREDICTED: scavenger receptor cysteine-rich type 1 protein M130-like [Sinocyclocheilus grahami]	-	-	-	-
Unigene0000809	10.33333333	23.66666667	0.6344	0.3603	0.6575	0.7007	0.6971	1.6494	0.550733333	1.015733333	0.883095856	0.209314349	1	no	-	reverse transcriptase [Danio rerio]	-	-	-	-
Unigene0000810	2788.333333	4882.666667	8.3592	9.4759	7.3742	13.1118	13.6045	10.0461	8.4031	12.25413333	0.544274896	0.157789775	1	no	NAV2	PREDICTED: neuron navigator 2-like [Sinocyclocheilus anshuiensis]	-	-	-	-
Unigene0000811	78.66666667	51.66666667	1.955	2.011	4.8556	0.9203	1.3898	2.3881	2.940533333	1.566066667	-0.908932216	0.134394311	1	no	rpl36	PREDICTED: 60S ribosomal protein L36 [Astyanax mexicanus]	ko03010//Ribosome//Translation//Genetic Information Processing	GO:0030529//intracellular ribonucleoprotein complex;GO:0032991//macromolecular complex;GO:1990904//ribonucleoprotein complex;GO:0005623//cell;GO:0044424//intracellular part;GO:0044464//cell part;GO:0005622//intracellular	-	GO:0048856//anatomical structure development;GO:0048731//system development;GO:0007399//nervous system development;GO:0071704//organic substance metabolic process;GO:0007049//cell cycle;GO:0044707//single-multicellular organism process;GO:0007417//central nervous system development;GO:0009987//cellular process;GO:0032501//multicellular organismal process;GO:0007275//multicellular organism develop…
Unigene0000812	7660.333333	7562	52.1284	41.6109	64.6389	27.3537	45.911	55.6841	52.79273333	42.98293333	-0.296575422	0.470629095	1	no	Ttll4	tubulin polyglutamylase TTLL4 [Chanodichthys ilishaeformis]	-	-	-	GO:0043412//macromolecule modification;GO:0036211//protein modification process;GO:0043170//macromolecule metabolic process;GO:0044238//primary metabolic process;GO:0019538//protein metabolic process;GO:0071704//organic substance metabolic process;GO:0008152//metabolic process
Unigene0000813	5.666666667	4	0.0719	0.2449	0.298	0.0841	0.1015	0.1682	0.204933333	0.117933333	-0.797183117	0.443190071	1	no	-	--	-	-	-	-
Unigene0000814	4	4.333333333	0.4231	0.1648	0.4385	0.4618	0.0797	0.33	0.342133333	0.2905	-0.236020506	0.899679798	1	no	-	--	-	-	-	-
Unigene0000815	17	20.66666667	1.1824	0.2763	0.9804	0.7743	0.8464	0.8116	0.813033333	0.810766667	-0.004027726	1	1	no	-	PREDICTED: uncharacterized protein LOC108180325 [Danio rerio]	-	-	-	-
Unigene0000816	6.666666667	15.66666667	0	0.3088	0.3288	0.4204	0.8365	0.0495	0.212533333	0.435466667	1.034873162	0.35077075	1	no	-	PREDICTED: LOW QUALITY PROTEIN: tetra-peptide repeat homeobox protein 1-like [Coturnix japonica]	-	-	-	-
Unigene0000817	10.33333333	19.33333333	0.6715	0.9442	0.6959	1.9776	0.9838	0.5819	0.770533333	1.1811	0.616201844	0.409085312	1	no	-	--	-	-	-	-
Unigene0000818	34.33333333	82	1.2004	0.547	0.9	2.708	0.7698	1.5539	0.882466667	1.677233333	0.926469718	0.139109774	1	no	nadX	PREDICTED: putative L-aspartate dehydrogenase isoform X1 [Cyprinus carpio]	-	-	GO:0000166//nucleotide binding;GO:0016638//oxidoreductase activity, acting on the CH-NH2 group of donors;GO:0097159//organic cyclic compound binding;GO:0036094//small molecule binding;GO:0016491//oxidoreductase activity;GO:1901265//nucleoside phosphate binding;GO:1901363//heterocyclic compound binding;GO:0003824//catalytic activity;GO:0005488//binding	GO:0046496//nicotinamide nucleotide metabolic process;GO:1901564//organonitrogen compound metabolic process;GO:0008152//metabolic process;GO:0009165//nucleotide biosynthetic process;GO:1901362//organic cyclic compound biosynthetic process;GO:0018130//heterocycle biosynthetic process;GO:0006739//NADP metabolic process;GO:0090407//organophosphate biosynthetic process;GO:0019359//nicotinamide nucleo…
Unigene0000819	56.33333333	99.33333333	1.0251	0.8342	0.7295	0.9543	1.2971	1.5276	0.862933333	1.259666667	0.545721006	0.29907928	1	no	CDHR5	PREDICTED: cadherin-related family member 5-like [Sinocyclocheilus anshuiensis]	-	-	-	-
Unigene0000820	42.33333333	49.33333333	1.3296	1.2245	2.0486	1.709	1.7263	1.0091	1.534233333	1.481466667	-0.050491746	0.939759484	1	no	-	--	-	-	-	-
Unigene0000821	45.33333333	72.33333333	4.569	4.2974	1.6053	3.5018	3.5013	6.705	3.490566667	4.569366667	0.38853295	0.520589805	1	no	-	--	-	-	-	-
Unigene0000822	393.3333333	533.6666667	2.7707	2.6282	3.019	3.9768	3.4864	2.006	2.805966667	3.1564	0.169782174	0.707335835	1	no	NCAM2	PREDICTED: neural cell adhesion molecule 2-like [Sinocyclocheilus rhinocerous]	ko04514//Cell adhesion molecules (CAMs)//Signaling molecules and interaction//Environmental Information Processing	-	-	-
Unigene0000823	155.6666667	192.6666667	2.9025	2.4911	3.5823	3.1859	2.7339	3.1576	2.991966667	3.0258	0.016222529	0.976223141	1	no	tmem120a	PREDICTED: transmembrane protein 120A-like [Sinocyclocheilus grahami]	-	-	-	-
Unigene0000824	540	500.6666667	8.0657	7.349	5.5197	5.6837	4.4805	5.7469	6.978133333	5.3037	-0.395841991	0.358234577	1	no	Trim35	PREDICTED: tripartite motif-containing protein 35-like isoform X1 [Sinocyclocheilus anshuiensis]	-	-	-	-
Unigene0000825	52.66666667	74.33333333	1.3898	1.3786	1.3861	1.656	1.5561	1.6159	1.384833333	1.609333333	0.216750819	0.682100642	1	no	-	--	-	-	-	-
Unigene0000826	0	0.666666667	0	0	0	0	0.1008	0	0.001	0.0336	5.070389328	0.558335958	1	no	-	--	-	-	-	-
Unigene0000827	86.66666667	172.6666667	1.7279	4.0025	1.9762	5.017	4.7144	3.1139	2.568866667	4.281766667	0.737074168	0.168695914	1	no	-	--	-	-	-	-
Unigene0000828	11.33333333	8.666666667	0.452	1.32	1.3117	0.5638	1.192	0.282	1.0279	0.679266667	-0.597649953	0.51209509	1	no	-	--	-	-	-	-
Unigene0000829	31	48.66666667	0.8994	1.0869	0.9	0.9188	1.6066	1.2821	0.9621	1.269166667	0.399622776	0.488244947	1	no	SPOCK2	PREDICTED: testican-2-like isoform X2 [Sinocyclocheilus anshuiensis]	-	-	-	-
Unigene0000830	0.666666667	0.666666667	0.0499	0	0	0.0389	0	0	0.016633333	0.012966667	-0.35926966	1	1	no	FAM19A4	PREDICTED: protein FAM19A4-like isoform X1 [Sinocyclocheilus anshuiensis]	-	-	-	-
Unigene0000831	299	469.3333333	1.3545	1.7125	0.9987	1.4529	2.2048	1.7124	1.355233333	1.790033333	0.401445188	0.377757823	1	no	RYR3	PREDICTED: ryanodine receptor 3-like [Sinocyclocheilus anshuiensis]	ko04020//Calcium signaling pathway//Signal transduction//Environmental Information Processing	-	-	-
Unigene0000832	34.33333333	40.66666667	3.4319	2.5421	1.7012	3.8971	1.9676	1.5712	2.5584	2.478633333	-0.045696976	0.948406714	1	no	-	--	-	-	-	-
Unigene0000833	28259.33333	29707	166.0065	159.7775	222.1519	121.8888	157.2911	194.2392	182.6453	157.8063667	-0.210889218	0.584896168	1	no	Caprin1	PREDICTED: caprin-1-like isoform X1 [Sinocyclocheilus rhinocerous]	-	-	-	-
Unigene0000834	3	5.333333333	0	0.5056	0.2691	0.3374	0.2446	0.5401	0.258233333	0.374033333	0.534491608	0.725836449	1	no	-	--	-	-	-	-
Unigene0000835	1007.666667	1743	3.9838	3.1	3.6071	4.6163	5.8693	4.8879	3.563633333	5.1245	0.524062343	0.19361067	1	no	PTPRZ1	PREDICTED: receptor-type tyrosine-protein phosphatase zeta-like [Sinocyclocheilus anshuiensis]	-	-	-	-
Unigene0000836	3	0.666666667	0.1814	0.4415	0.188	0.0707	0.0854	0	0.2703	0.052033333	-2.377053475	0.121276326	1	no	-	--	-	-	-	-
Unigene0000837	15.33333333	5	1.7956	0.5244	1.8611	0.7	0.0846	0.2801	1.3937	0.3549	-1.973435569	0.028465886	1	no	-	--	-	-	-	-
Unigene0000838	18	10.33333333	1.3858	1.1993	1.596	0.9004	0.5802	0.4804	1.3937	0.653666667	-1.092293013	0.113116051	1	no	-	--	-	-	-	-
Unigene0000839	4.666666667	5.666666667	0.2171	0.2113	1.125	0	1.1247	0.508	0.5178	0.544233333	0.071830357	1	1	no	-	--	-	-	-	-
Unigene0000840	1106.333333	1513.666667	6.3735	6.8638	4.4187	7.5781	7.469	5.1086	5.885333333	6.718566667	0.191029354	0.649901122	1	no	CCNT1	PREDICTED: cyclin-T1-like isoform X1 [Sinocyclocheilus grahami]	-	-	-	GO:0065007//biological regulation;GO:0006807//nitrogen compound metabolic process;GO:0006725//cellular aromatic compound metabolic process;GO:0034654//nucleobase-containing compound biosynthetic process;GO:0046483//heterocycle metabolic process;GO:0010467//gene expression;GO:1901360//organic cyclic compound metabolic process;GO:0071704//organic substance metabolic process;GO:0006139//nucleobase-c…
Unigene0000841	13	28	0.8487	0.3787	0.1466	1.2681	0.2998	0.7999	0.458	0.789266667	0.785165222	0.323620547	1	no	-	--	-	-	-	-
Unigene0000842	43.33333333	34	0.9925	0.5797	2.1749	0.5085	0.3472	1.4598	1.249033333	0.771833333	-0.694450723	0.326753957	1	no	-	--	-	-	-	-
Unigene0000843	2.333333333	1	0.1808	0.352	0.0937	0	0	0.2115	0.208833333	0.0705	-1.566656846	0.408582092	1	no	-	--	-	-	-	-
Unigene0000844	249.6666667	254	3.1677	2.8835	2.5247	2.4251	2.9406	1.9356	2.858633333	2.433766667	-0.232134724	0.610936889	1	no	Igsf5	PREDICTED: immunoglobulin superfamily member 5-like [Sinocyclocheilus rhinocerous]	ko04530//Tight junction//Cellular commiunity//Cellular Processes	-	-	-
Unigene0000845	650	575	9.1849	4.5608	10.4758	4.1892	3.9957	9.0442	8.073833333	5.743033333	-0.49144087	0.325952413	1	no	-	--	-	-	-	-
Unigene0000846	25.66666667	29.66666667	1.1685	0.4875	2.7105	0.9543	1.7295	1.4756	1.4555	1.386466667	-0.070101908	0.939919045	1	no	-	PREDICTED: astrotactin-2-like [Sinocyclocheilus grahami]	-	-	-	-
Unigene0000847	70.66666667	127	1.1616	1.7771	0.5504	3.1309	1.1567	0.8414	1.163033333	1.709666667	0.555822625	0.389466331	1	no	zgc:171711	PREDICTED: repressor of yield of DENV protein homolog [Sinocyclocheilus rhinocerous]	-	-	-	-
Unigene0000848	313	409	2.3085	2.9181	1.6331	2.9596	2.2986	2.1493	2.286566667	2.469166667	0.110841238	0.809693666	1	no	-	PREDICTED: titin-like [Sinocyclocheilus anshuiensis]	-	-	-	-
Unigene0000849	4	3	0.6019	0.1172	0.7487	0.3754	0	0.4695	0.489266667	0.281633333	-0.796802899	0.618359334	1	no	-	--	-	-	-	-
Unigene0000850	0	2.333333333	0	0	0	0.0458	0.3319	0	0.001	0.1259	6.976134473	0.088450926	1	no	-	--	-	-	-	-
Unigene0000851	3	4	0.1164	0.3967	0	0.1815	0.329	0.0908	0.171033333	0.200433333	0.228844933	1	1	no	-	--	-	-	-	-
Unigene0000852	22.33333333	31.33333333	0.355	0.8987	0.3189	1.384	0.1115	0.2585	0.5242	0.584666667	0.157496988	0.875649599	1	no	-	PREDICTED: interleukin-15 receptor subunit alpha isoform X1 [Sinocyclocheilus rhinocerous]	ko04060//Cytokine-cytokine receptor interaction//Signaling molecules and interaction//Environmental Information Processing;ko04630//Jak-STAT signaling pathway//Signal transduction//Environmental Information Processing;ko04672//Intestinal immune network for IgA production//Immune system//Organismal Systems	-	-	-
Unigene0000853	1560	2324	12.2714	10.7634	10.7136	12.0291	14.7229	14.8909	11.24946667	13.88096667	0.303251435	0.438682944	1	no	Sapcd2	suppressor APC domain-containing protein 2 [Danio rerio]	-	-	-	-
Unigene0000854	22318.33333	22340	149.7323	163.4539	149.3053	109.9735	153.3054	123.4845	154.1638333	128.9211333	-0.257975574	0.487726569	1	no	cct3	PREDICTED: T-complex protein 1 subunit gamma-like [Sinocyclocheilus grahami]	-	GO:0044464//cell part;GO:0005623//cell;GO:0005622//intracellular;GO:0044424//intracellular part	GO:0005515//protein binding;GO:0001883//purine nucleoside binding;GO:0005488//binding;GO:0032549//ribonucleoside binding;GO:0036094//small molecule binding;GO:0097367//carbohydrate derivative binding;GO:0032550//purine ribonucleoside binding;GO:1901363//heterocyclic compound binding;GO:0001882//nucleoside binding;GO:0097159//organic cyclic compound binding	GO:0050789//regulation of biological process;GO:0044238//primary metabolic process;GO:0010941//regulation of cell death;GO:0065007//biological regulation;GO:0043170//macromolecule metabolic process;GO:0043067//regulation of programmed cell death;GO:0044699//single-organism process;GO:0009987//cellular process;GO:0008152//metabolic process;GO:0048731//system development;GO:0044707//single-multicel…
Unigene0000855	16.33333333	29.33333333	0.3719	0.7643	0.8993	1.1275	0.6616	1.1602	0.6785	0.9831	0.534989358	0.419257704	1	no	-	PREDICTED: trichohyalin-like [Sinocyclocheilus rhinocerous]	-	-	-	-
Unigene0000856	1534.333333	1976.333333	31.9199	110.9957	42.2487	68.2068	73.1214	58.7809	61.72143333	66.70303333	0.111980804	0.820430082	1	no	Tmsb4x	thymosin beta a [Cyprinus carpio]	ko04810//Regulation of actin cytoskeleton//Cell motility//Cellular Processes	GO:0005622//intracellular;GO:0044464//cell part;GO:0005623//cell;GO:0044424//intracellular part	GO:0005488//binding;GO:0008092//cytoskeletal protein binding;GO:0005515//protein binding	GO:0030837//negative regulation of actin filament polymerization;GO:0031333//negative regulation of protein complex assembly;GO:0032956//regulation of actin cytoskeleton organization;GO:0032271//regulation of protein polymerization;GO:0030832//regulation of actin filament length;GO:0051493//regulation of cytoskeleton organization;GO:0065007//biological regulation;GO:0071840//cellular component or…
Unigene0000857	14	15.33333333	0.6586	0.5038	0.8289	0.4768	0.3545	0.9174	0.663766667	0.5829	-0.18742778	0.84377262	1	no	MOG	PREDICTED: butyrophilin subfamily 1 member A1-like [Cyprinus carpio]	-	-	-	-
Unigene0000858	1299.333333	1413.333333	13.2101	9.4311	13.7208	9.8509	11.2291	11.5044	12.12066667	10.86146667	-0.158250124	0.69723658	1	no	HNRNPUL1	PREDICTED: heterogeneous nuclear ribonucleoprotein U-like protein 2 isoform X1 [Sinocyclocheilus rhinocerous]	-	-	-	-
Unigene0000859	0.666666667	1.666666667	0.1308	0	0	0.051	0.1232	0.102	0.0436	0.092066667	1.078350779	0.562100258	1	no	-	--	-	-	-	-
Unigene0000860	116.6666667	131.3333333	4.3631	5.0675	3.9669	4.4162	5.0471	3.1645	4.465833333	4.209266667	-0.0853605	0.861456354	1	no	-	--	-	-	-	-
Unigene0000861	120.3333333	56.66666667	2.2266	0.2395	2.04	0.1343	0.1622	1.3625	1.502033333	0.553	-1.441565444	0.111505005	1	no	-	--	-	-	-	-
Unigene0000862	71.33333333	80	2.3497	2.4853	1.353	2.2842	2.1859	1.335	2.062666667	1.935033333	-0.092152277	0.867620485	1	no	-	--	-	-	-	-
Unigene0000863	27.33333333	8.666666667	0.3916	1.4775	0.1015	0.1718	0.2075	0.1527	0.656866667	0.177333333	-1.889136811	0.034189843	1	no	-	--	-	-	-	-
Unigene0000864	1127.666667	1669	13.8383	16.9526	12.537	19.0203	18.2364	15.9113	14.44263333	17.72266667	0.295261884	0.463590622	1	no	ZFAND5	PREDICTED: AN1-type zinc finger protein 5-like isoform X1 [Sinocyclocheilus anshuiensis]	-	-	GO:0043167//ion binding;GO:0046914//transition metal ion binding;GO:0005488//binding;GO:0046872//metal ion binding;GO:0043169//cation binding	-
Unigene0000865	13	14	0.5355	0.1896	1.2111	0.6832	0.5044	0.4937	0.6454	0.560433333	-0.203650811	0.849558123	1	no	-	--	-	-	-	-
Unigene0000866	184.6666667	205	2.8274	3.525	1.5998	2.508	2.867	2.0366	2.650733333	2.470533333	-0.10156902	0.840920176	1	no	-	--	-	-	-	-
Unigene0000867	46.33333333	32.66666667	1.4214	1.0449	1.5935	0.5202	0.4372	1.335	1.353266667	0.764133333	-0.824549856	0.190796489	1	no	-	--	-	-	-	-
Unigene0000868	170	121.3333333	2.1502	1.4936	2.1009	1.0826	0.9072	1.3452	1.9149	1.111666667	-0.784544793	0.107265524	1	no	-	PREDICTED: uncharacterized protein LOC103909920 [Danio rerio]	-	-	-	-
Unigene0000869	49.66666667	70.33333333	0.6564	1.3471	0.6251	1.632	0.6851	0.7195	0.8762	1.0122	0.20816226	0.728734126	1	no	Sowahc	PREDICTED: ankyrin repeat domain-containing protein SOWAHD-like [Sinocyclocheilus rhinocerous]	-	-	-	-
Unigene0000870	2.333333333	1	0	0.0699	0.4464	0.056	0.0676	0.056	0.1721	0.059866667	-1.523422248	0.43359566	1	no	-	--	-	-	-	-
Unigene0000871	21.66666667	10.66666667	2.5896	1.146	4.0262	0.5506	0.887	1.6527	2.587266667	1.0301	-1.328644361	0.080490677	1	no	-	--	-	-	-	-
Unigene0000872	32.33333333	44	1.9561	0.7617	1.0948	1.6165	0.7738	1.7699	1.270866667	1.386733333	0.125877709	0.849427268	1	no	-	--	-	-	-	-
Unigene0000873	135	283.6666667	2.5779	1.6732	1.9881	3.1942	3.8013	3.8421	2.079733333	3.612533333	0.796612344	0.08987085	1	no	-	PREDICTED: LOW QUALITY PROTEIN: scavenger receptor cysteine-rich domain-containing group B protein-like [Chrysemys picta bellii]	-	-	-	-
Unigene0000874	468.3333333	950.6666667	5.8691	7.0142	6.0971	8.9621	10.726	12.1658	6.3268	10.61796667	0.746959622	0.074795732	1	no	-	--	-	-	-	-
Unigene0000875	6672	10124.33333	140.8201	306.4027	67.0519	363.5085	154.7244	123.9524	171.4249	214.0617667	0.32045046	0.562819955	1	no	tmsb	PREDICTED: thymosin beta-4 [Pygocentrus nattereri]	ko04810//Regulation of actin cytoskeleton//Cell motility//Cellular Processes	GO:0005737//cytoplasm;GO:0044464//cell part;GO:0044424//intracellular part;GO:0005622//intracellular;GO:0005623//cell	GO:0005515//protein binding;GO:0005488//binding;GO:0008092//cytoskeletal protein binding	GO:0071840//cellular component organization or biogenesis;GO:0051494//negative regulation of cytoskeleton organization;GO:0050789//regulation of biological process;GO:0051128//regulation of cellular component organization;GO:0010639//negative regulation of organelle organization;GO:0030832//regulation of actin filament length;GO:0044763//single-organism cellular process;GO:0048523//negative regul…
Unigene0000876	95.33333333	136	3.0951	1.2483	2.0164	2.3958	3.1027	2.0693	2.119933333	2.5226	0.250892565	0.638553919	1	no	-	PREDICTED: oxysterol-binding protein-related protein 5 isoform X1 [Esox lucius]	-	-	-	-
Unigene0000877	164	207.6666667	14.7823	10.1189	13.167	11.1646	16.0994	12.9117	12.6894	13.3919	0.077736805	0.873281143	1	no	-	--	-	-	-	-
Unigene0000878	0	0.666666667	0	0	0	0	0	0.1693	0.001	0.056433333	5.818475662	0.555725974	1	no	-	PREDICTED: calcium/calmodulin-dependent protein kinase type IV-like [Pseudopodoces humilis]	ko04020//Calcium signaling pathway//Signal transduction//Environmental Information Processing	-	-	-
Unigene0000879	253	362.6666667	3.1202	5.2699	2.5721	4.3107	4.0462	4.6525	3.654066667	4.336466667	0.247017064	0.601197051	1	no	-	ADP-ribosylation factor GTPase-activating protein 1-like [Scleropages formosus]	-	-	-	-
Unigene0000880	290.6666667	317.6666667	5.5859	7.2947	3.8531	5.286	5.9147	4.1317	5.5779	5.1108	-0.126172934	0.787701616	1	no	ALKBH4	PREDICTED: alpha-ketoglutarate-dependent dioxygenase alkB homolog 4-like [Sinocyclocheilus rhinocerous]	-	-	GO:0003824//catalytic activity	GO:0044699//single-organism process;GO:0008152//metabolic process;GO:0044710//single-organism metabolic process
Unigene0000881	9.333333333	14	0.7106	0.3144	0.8034	0.3022	0.9127	1.0581	0.609466667	0.757666667	0.31401596	0.698527196	1	no	-	PREDICTED: uncharacterized protein si:ch211-12e13.10 [Danio rerio]	-	-	-	-
Unigene0000882	29.66666667	46.66666667	1.3431	1.7259	1.7261	2.6805	2.5301	1.0895	1.598366667	2.100033333	0.393813826	0.523171187	1	no	-	--	-	-	-	-
Unigene0000883	2638	2963.333333	14.729	10.6038	18.0266	11.9069	12.7576	15.2111	14.45313333	13.29186667	-0.120838566	0.763163363	1	no	CSNK1G1	PREDICTED: casein kinase I-like isoform X2 [Sinocyclocheilus grahami]	ko04340//Hedgehog signaling pathway//Signal transduction//Environmental Information Processing	GO:0005623//cell;GO:0005622//intracellular;GO:0044464//cell part;GO:0044424//intracellular part	GO:0097367//carbohydrate derivative binding;GO:0036094//small molecule binding;GO:0003824//catalytic activity;GO:0004672//protein kinase activity;GO:0032549//ribonucleoside binding;GO:0001882//nucleoside binding;GO:0016772//transferase activity, transferring phosphorus-containing groups;GO:1901363//heterocyclic compound binding;GO:0016301//kinase activity;GO:0005488//binding;GO:0016773//phosphotr…	GO:0044238//primary metabolic process;GO:0007154//cell communication;GO:0044700//single organism signaling;GO:0044237//cellular metabolic process;GO:0044763//single-organism cellular process;GO:0019538//protein metabolic process;GO:0007166//cell surface receptor signaling pathway;GO:0023052//signaling;GO:0006464//cellular protein modification process;GO:0065007//biological regulation;GO:0043412//…
Unigene0000884	652	947.3333333	9.2862	7.1662	6.5464	5.812	13.9441	8.6627	7.666266667	9.472933333	0.305287049	0.506996799	1	no	-	--	-	-	-	-
Unigene0000885	3.333333333	6.666666667	0.6909	0.2242	0.2387	0.9875	0.4339	0.4491	0.3846	0.6235	0.697030797	0.50251109	1	no	-	--	-	-	-	-
Unigene0000886	38.33333333	44.66666667	1.2883	1.1435	1.9636	1.7133	1.499	1.0049	1.465133333	1.405733333	-0.05970902	0.933878867	1	no	-	--	-	-	-	-
Unigene0000887	9	14.33333333	0.6939	0.9008	1.5584	1.1722	1.6341	1.3532	1.051033333	1.3865	0.399639192	0.624249243	1	no	-	--	-	-	-	-
Unigene0000888	37.33333333	25.66666667	0.7142	0.9561	1.6964	0.464	0.5606	0.8588	1.122233333	0.6278	-0.837995736	0.172967258	1	no	-	--	-	-	-	-
Unigene0000889	6.333333333	12	0.4786	0.233	0.8268	0.1866	0.7514	1.4312	0.5128	0.789733333	0.622969323	0.494237377	1	no	-	--	-	-	-	-
Unigene0000890	15	11.66666667	1.9429	1.4933	1.1659	1.1161	0.4816	1.2762	1.534033333	0.957966667	-0.67928247	0.362695586	1	no	-	--	-	-	-	-
Unigene0000891	6	5	0.9249	0.4093	0.1743	0.3933	0.4752	0.1967	0.502833333	0.355066667	-0.501990363	0.633791424	1	no	-	--	-	-	-	-
Unigene0000892	54.66666667	51.66666667	2.9033	2.5958	4.2988	2.864	2.6789	2.0797	3.265966667	2.540866667	-0.362189395	0.512044002	1	no	-	--	-	-	-	-
Unigene0000893	412.6666667	385.6666667	25.5834	16.0742	28.6777	14.2344	14.5435	24.5707	23.4451	17.78286667	-0.398798522	0.395185847	1	no	-	--	-	-	-	-
Unigene0000894	84	78	2.3886	1.7554	1.7718	1.4788	1.544	1.5161	1.971933333	1.512966667	-0.382230575	0.449375475	1	no	-	--	-	-	-	-
Unigene0000895	955.3333333	1026	7.0809	12.9534	12.7963	15.4753	7.2614	5.9241	10.94353333	9.5536	-0.195962237	0.687732964	1	no	SERPINB1	PREDICTED: leukocyte elastase inhibitor-like [Sinocyclocheilus rhinocerous]	-	GO:0005576//extracellular region;GO:0044421//extracellular region part	-	-
Unigene0000896	150	145.6666667	10.0929	9.1291	13.2062	8.0362	8.9	8.9893	10.8094	8.641833333	-0.322877133	0.502839496	1	no	-	--	-	-	-	-
Unigene0000897	86.66666667	77.33333333	3.3533	4.3159	7.2457	2.7915	3.9615	4.2115	4.971633333	3.654833333	-0.443914281	0.414584782	1	no	-	--	-	-	-	-
Unigene0000898	692	720	20.1594	13.2805	24.1445	15.1809	16.1909	17.7412	19.1948	16.371	-0.229573079	0.5959313	1	no	-	--	-	-	-	-
Unigene0000899	15	12.33333333	1.0249	0.105	1.3418	0.3364	0.6605	0.6732	0.8239	0.5567	-0.565569159	0.525534679	1	no	-	--	-	-	-	-
Unigene0000900	8118	39913.66667	136.0192	3.0398	30.932	514.9436	54.6714	87.6034	56.66366667	219.0728	1.950914505	0.044930426	1	no	ITIH3	PREDICTED: inter-alpha-trypsin inhibitor heavy chain H3-like isoform X1 [Sinocyclocheilus anshuiensis]	-	-	-	-
Unigene0000901	16	6.666666667	1.0761	1.2223	0.5577	0.5127	0.2816	0.1865	0.952033333	0.326933333	-1.542015609	0.046609127	1	no	-	PREDICTED: piggyBac transposable element-derived protein 3-like [Lates calcarifer]	-	-	-	-
Unigene0000902	9.666666667	15.66666667	0.711	0.2884	0.7369	0.9239	0.3907	0.9243	0.578766667	0.7463	0.366773852	0.622167532	1	no	-	--	-	-	-	-
Unigene0000903	3	3.666666667	0.3204	0.2079	0.4428	0.2498	0.3018	0.4165	0.3237	0.3227	-0.004463788	1	1	no	-	--	-	-	-	-
Unigene0000904	34.33333333	26.33333333	4.3537	2.2959	2.7263	1.2021	3.1611	1.7687	3.1253	2.043966667	-0.612623013	0.333533037	1	no	-	--	-	-	-	-
Unigene0000905	8.333333333	11	0.7752	0.5031	0.3348	1.4605	0.1217	0.1008	0.5377	0.561	0.061199299	0.958440844	1	no	-	--	-	-	-	-
Unigene0000906	41.33333333	41	1.243	1.0239	0.6937	1.1741	0.9231	0.3543	0.986866667	0.817166667	-0.272224823	0.658585602	1	no	-	--	-	-	-	-
Unigene0000907	37.33333333	33	1.7309	0.7222	0.6265	0.9853	0.7505	0.5143	1.026533333	0.750033333	-0.452753856	0.48105049	1	no	-	--	-	-	-	-
Unigene0000908	10.66666667	20.66666667	0.4474	1.3066	1.1129	2.0928	0.6742	1.675	0.955633333	1.480666667	0.63171781	0.386480592	1	no	-	--	-	-	-	-
Unigene0000909	29.33333333	31.66666667	2.0535	1.3841	1.2006	1.1084	1.6863	1.3964	1.546066667	1.397033333	-0.146236086	0.805213772	1	no	-	--	-	-	-	-
Unigene0000910	1011	1434.666667	8.5248	11.1237	7.3832	10.8289	11.578	9.546	9.010566667	10.65096667	0.24129463	0.557064636	1	no	cipc	PREDICTED: CLOCK-interacting pacemaker [Sinocyclocheilus rhinocerous]	-	-	-	-
Unigene0000911	11	15.66666667	0.5687	1.2655	0.8421	1.2034	1.7601	0.3169	0.8921	1.093466667	0.293631899	0.738110659	1	no	-	--	-	-	-	-
Unigene0000912	18	48.33333333	0.3664	1.9364	0.4883	3.2646	2.0214	0.9799	0.930366667	2.088633333	1.166687931	0.125003542	1	no	Mpeg1	PREDICTED: macrophage-expressed gene 1 protein-like [Cyprinus carpio]	-	-	-	-
Unigene0000913	851	1242.666667	10.9314	15.9569	6.8284	13.4827	16.4769	11.4897	11.2389	13.81643333	0.297884397	0.508789938	1	no	Triobp	PREDICTED: TRIO and F-actin-binding protein-like isoform X2 [Danio rerio]	-	-	-	-
Unigene0000914	32.66666667	84.66666667	0.148	2.2471	0.4601	3.8759	0.7805	1.3388	0.951733333	1.9984	1.070216076	0.214826775	1	no	-	--	-	-	-	-
Unigene0000915	306.3333333	308.6666667	21.1485	17.5104	22.1931	18.2345	16.7554	15.4684	20.284	16.81943333	-0.270213079	0.539811151	1	no	-	--	-	-	-	-
Unigene0000916	1909	2063	41.7762	48.3153	41.1411	34.7475	45.4736	38.0856	43.7442	39.43556667	-0.149594371	0.702664411	1	no	fam162b	PREDICTED: protein FAM162B-like [Sinocyclocheilus rhinocerous]	-	-	-	-
Unigene0000917	36.66666667	34.33333333	1.2757	0.918	0.8623	0.4757	0.5224	1.3196	1.018666667	0.772566667	-0.398950705	0.53258158	1	no	-	--	-	-	-	-
Unigene0000918	69	54.33333333	1.2055	4.936	1.1025	2.9301	1.2023	0.5808	2.414666667	1.571066667	-0.620079644	0.407569415	1	no	-	--	-	-	-	-
Unigene0000919	90.33333333	163.3333333	1.6624	3.1261	1.3454	5.0423	2.1879	1.8474	2.044633333	3.025866667	0.565506271	0.327303718	1	no	-	--	-	-	-	-
Unigene0000920	35	59.66666667	1.6215	1.8417	2.2409	2.9919	2.4438	2.5296	1.901366667	2.6551	0.481729425	0.375067451	1	no	K02A2.6	Immunoglobulin superfamily member 21, partial [Larimichthys crocea]	-	-	-	-
Unigene0000921	15.33333333	25	0.4209	0.6439	0.3116	0.2344	1.076	0.6331	0.4588	0.647833333	0.49775731	0.491035961	1	no	P2RX7	PREDICTED: P2X purinoceptor 7-like isoform X1 [Nothobranchius furzeri]	-	-	-	-
Unigene0000922	114	127.6666667	4.6458	3.6682	4.2466	3.3654	3.1356	4.9649	4.186866667	3.821966667	-0.131555779	0.793854085	1	no	-	PREDICTED: uncharacterized protein LOC107677180 isoform X3 [Sinocyclocheilus anshuiensis]	-	-	-	-
Unigene0000923	38.66666667	60	1.0689	1.1563	2.421	2.4075	1.417	1.9763	1.548733333	1.9336	0.320200621	0.590380089	1	no	-	--	-	-	-	-
Unigene0000924	259.6666667	375.3333333	2.8622	2.3666	2.4281	3.1791	2.9822	2.9589	2.5523	3.040066667	0.252305046	0.564473236	1	no	CAMK2G	PREDICTED: calcium/calmodulin-dependent protein kinase type II subunit gamma-like [Sinocyclocheilus anshuiensis]	ko04020//Calcium signaling pathway//Signal transduction//Environmental Information Processing;ko04261//Adrenergic signaling in cardiomyocytes//Circulatory system//Organismal Systems;ko04310//Wnt signaling pathway//Signal transduction//Environmental Information Processing;ko04916//Melanogenesis//Endocrine system//Organismal Systems;ko04912//GnRH signaling pathway//Endocrine system//Organismal Syst…	-	-	-
Unigene0000925	12.66666667	14	0.5252	1.3878	0.9332	1.2284	1.2721	0.1756	0.948733333	0.892033333	-0.088905015	0.928137967	1	no	-	--	-	-	-	-
Unigene0000926	23	16.66666667	1.7621	0.3119	1.6604	0.5412	0.6538	0.9996	1.2448	0.731533333	-0.766918456	0.312433386	1	no	-	--	-	-	-	-
Unigene0000927	64.66666667	40	3.0684	1.2054	6.3606	1.385	1.3183	2.5613	3.5448	1.754866667	-1.014342812	0.128896699	1	no	-	--	-	-	-	-
Unigene0000928	115.6666667	190.6666667	2.9005	3.7496	1.5524	4.671	3.6502	2.9115	2.734166667	3.744233333	0.453569156	0.382398364	1	no	-	--	-	-	-	-
Unigene0000929	21.66666667	15.33333333	1.4446	0.9376	0.4537	0.7167	0.536	0.4098	0.9453	0.554166667	-0.77045232	0.25335695	1	no	-	--	-	-	-	-
Unigene0000930	2345.666667	2248.333333	68.745	62.2927	84.9784	42.1536	54.2048	73.4718	72.00536667	56.61006667	-0.347045814	0.395462171	1	no	Ppp3r1	PREDICTED: calcineurin subunit B type 1-like [Sinocyclocheilus anshuiensis]	ko04010//MAPK signaling pathway//Signal transduction//Environmental Information Processing;ko04020//Calcium signaling pathway//Signal transduction//Environmental Information Processing;ko04310//Wnt signaling pathway//Signal transduction//Environmental Information Processing;ko04114//Oocyte meiosis//Cell growth and death//Cellular Processes;ko04210//Apoptosis//Cell growth and death//Cellular Proce…	GO:0044422//organelle part;GO:0043229//intracellular organelle;GO:0043226//organelle;GO:0044428//nuclear part;GO:0005737//cytoplasm;GO:0043233//organelle lumen;GO:0070013//intracellular organelle lumen;GO:0032991//macromolecular complex;GO:0044446//intracellular organelle part;GO:0031981//nuclear lumen;GO:0043234//protein complex;GO:0005634//nucleus;GO:0044464//cell part;GO:0043227//membrane-boun…	GO:0042578//phosphoric ester hydrolase activity;GO:0043169//cation binding;GO:0003824//catalytic activity;GO:0016791//phosphatase activity;GO:0016788//hydrolase activity, acting on ester bonds;GO:0004721//phosphoprotein phosphatase activity;GO:0005515//protein binding;GO:0043167//ion binding;GO:0046872//metal ion binding;GO:0004722//protein serine/threonine phosphatase activity;GO:0005488//bindin…	GO:0050896//response to stimulus;GO:0044267//cellular protein metabolic process;GO:0032502//developmental process;GO:0002768//immune response-regulating cell surface receptor signaling pathway;GO:0006952//defense response;GO:0050794//regulation of cellular process;GO:0006913//nucleocytoplasmic transport;GO:0010638//positive regulation of organelle organization;GO:0042991//transcription factor imp…
Unigene0000931	232	213.3333333	0.6604	10.845	0.3062	6.4087	1.4241	1.0844	3.9372	2.9724	-0.405541725	0.685886957	1	no	LUM	zgc:86661, partial [Danio rerio]	-	-	-	GO:0009987//cellular process;GO:0009790//embryo development;GO:0007600//sensory perception;GO:0071840//cellular component organization or biogenesis;GO:0050877//neurological system process;GO:0050953//sensory perception of light stimulus;GO:0032502//developmental process;GO:0007275//multicellular organism development;GO:0048513//animal organ development;GO:0044767//single-organism developmental p…
Unigene0000932	39.66666667	36.33333333	3.2653	4.7684	2.7263	2.1921	3.0756	2.9715	3.586666667	2.7464	-0.38510191	0.495773625	1	no	-	--	-	-	-	-
Unigene0000933	11	22	0.3623	0.5996	0.2253	0.8757	0.7508	0.3674	0.395733333	0.664633333	0.748030059	0.303428907	1	no	-	--	-	-	-	-
Unigene0000934	131	254.6666667	0.8138	2.841	0.8676	3.7345	2.0807	1.4691	1.507466667	2.4281	0.687701738	0.25374775	1	no	TAGAP	PREDICTED: T-cell activation Rho GTPase-activating protein-like isoform X1 [Sinocyclocheilus grahami]	-	GO:0044464//cell part;GO:0005623//cell	-	-
Unigene0000935	82	234.6666667	0.8608	1.199	1.2079	4.8627	1.16	1.4461	1.089233333	2.4896	1.192600927	0.049459914	1	no	Ovos	PREDICTED: alpha-2-macroglobulin-like [Sinocyclocheilus grahami]	-	GO:0005576//extracellular region	-	-
Unigene0000936	12	3.666666667	0.8828	0	1.2811	0	0.0554	0.4591	0.7213	0.1715	-2.072390847	0.141267294	1	no	-	--	-	-	-	-
Unigene0000937	375.3333333	671	8.9949	5.6832	11.1358	7.0836	12.1953	18.4795	8.604633333	12.58613333	0.54864951	0.264847287	1	no	ZBED9	PREDICTED: SCAN domain-containing protein 3-like [Sinocyclocheilus grahami]	-	-	-	-
Unigene0000938	140.6666667	151.3333333	1.983	5.5474	2.008	3.9627	1.7605	2.649	3.179466667	2.790733333	-0.188140509	0.746828416	1	no	-	--	-	-	-	-
Unigene0000939	30.33333333	41.66666667	0.8122	1.2033	1.2079	1.1013	0.7983	1.6802	1.074466667	1.193266667	0.151295761	0.812142647	1	no	-	--	-	-	-	-
Unigene0000940	409.3333333	220.3333333	8.6678	19.3939	2.6269	2.8454	6.9708	4.4481	10.22953333	4.754766667	-1.105293882	0.083802319	1	no	-	--	-	-	-	-
Unigene0000941	31.66666667	56.66666667	0.2881	1.7262	0.0459	2.2117	0.4175	0.3803	0.686733333	1.003166667	0.546739419	0.58267761	1	no	PRDM1	PREDICTED: PR domain zinc finger protein 1-like isoform X3 [Cyprinus carpio]	-	-	-	-
Unigene0000942	3	4.666666667	0.2142	0.139	0.296	0.3339	0.269	0.2227	0.2164	0.2752	0.346779971	0.772957672	1	no	-	--	-	-	-	-
Unigene0000943	5.666666667	8.333333333	0.3664	0.3057	0.217	0.4489	0.3944	0.245	0.296366667	0.362766667	0.291658706	0.785424586	1	no	Dos	PREDICTED: voltage-dependent calcium channel beta subunit-associated regulatory protein-like [Sinocyclocheilus anshuiensis]	-	-	-	-
Unigene0000944	1258	2342.666667	2.3406	2.8003	5.6235	4.5092	4.9166	6.876	3.588133333	5.433933333	0.598763365	0.188790994	1	no	NBEAL1	PREDICTED: neurobeachin-like protein 1 isoform X2 [Sinocyclocheilus grahami]	-	-	-	-
Unigene0000945	1	0.666666667	0	0.2014	0.1072	0.1613	0	0	0.102866667	0.053766667	-0.935991623	1	1	no	-	--	-	-	-	-
Unigene0000946	4387	6939	25.5219	32.6314	19.9028	23.2256	47.609	33.8701	26.0187	34.90156667	0.423742917	0.309598154	1	no	Gpat2	glycerol-3-phosphate acyltransferase 2, mitochondrial [Danio rerio]	ko01100//Metabolic pathways//Global and Overview//Metabolism;ko01110//Biosynthesis of secondary metabolites//Global and Overview//Metabolism;ko00564//Glycerophospholipid metabolism//Lipid metabolism//Metabolism;ko00561//Glycerolipid metabolism//Lipid metabolism//Metabolism	-	GO:0016747//transferase activity, transferring acyl groups other than amino-acyl groups;GO:0016740//transferase activity;GO:0016746//transferase activity, transferring acyl groups;GO:0003824//catalytic activity	GO:0044699//single-organism process;GO:0008152//metabolic process;GO:0044238//primary metabolic process;GO:0044710//single-organism metabolic process;GO:0071704//organic substance metabolic process;GO:0006629//lipid metabolic process
Unigene0000947	5.333333333	3	0	0.4073	0.2602	0.0652	0.0788	0.1632	0.2225	0.1024	-1.119589621	0.397787542	1	no	-	--	-	-	-	-
Unigene0000948	3237	2604	168.5151	213.5796	170.0086	137.2733	111.565	116.5933	184.0344333	121.8105333	-0.595336831	0.12359741	1	no	-	--	-	-	-	-
Unigene0000949	45.66666667	26	1.4477	1.0364	3.4424	0.4648	0.9626	1.3285	1.9755	0.918633333	-1.104656807	0.101982808	1	no	MYH6	Myosin-7 [Larimichthys crocea]	ko04261//Adrenergic signaling in cardiomyocytes//Circulatory system//Organismal Systems;ko04530//Tight junction//Cellular commiunity//Cellular Processes;ko04260//Cardiac muscle contraction//Circulatory system//Organismal Systems	GO:0015629//actin cytoskeleton;GO:0043226//organelle;GO:0005622//intracellular;GO:0043228//non-membrane-bounded organelle;GO:0005856//cytoskeleton;GO:0005623//cell;GO:0043229//intracellular organelle;GO:0044464//cell part;GO:0043232//intracellular non-membrane-bounded organelle;GO:0044424//intracellular part	GO:1901363//heterocyclic compound binding;GO:0016817//hydrolase activity, acting on acid anhydrides;GO:0016787//hydrolase activity;GO:0032549//ribonucleoside binding;GO:0097367//carbohydrate derivative binding;GO:0017111//nucleoside-triphosphatase activity;GO:0016818//hydrolase activity, acting on acid anhydrides, in phosphorus-containing anhydrides;GO:0005515//protein binding;GO:0003824//catalyt…	GO:0032502//developmental process;GO:0048856//anatomical structure development;GO:0044699//single-organism process;GO:0009790//embryo development;GO:0032501//multicellular organismal process;GO:0007275//multicellular organism development;GO:0044707//single-multicellular organism process;GO:0044767//single-organism developmental process
Unigene0000950	30	37.66666667	1.1	1.524	1.184	1.7482	0.7572	1.353	1.269333333	1.286133333	0.018969237	1	1	no	ZNF502	PREDICTED: gastrula zinc finger protein XlCGF26.1-like isoform X2 [Sinocyclocheilus anshuiensis]	-	-	-	-
Unigene0000951	26.66666667	48.33333333	0.8179	0.6792	0.4239	0.9752	1.0876	0.8444	0.640333333	0.969066667	0.597772806	0.309709379	1	no	-	--	-	-	-	-
Unigene0000952	175	267.6666667	8.8583	6.085	8.8086	10.6573	10.7157	8.6283	7.9173	10.00043333	0.336982092	0.470411814	1	no	-	--	-	-	-	-
Unigene0000953	18.33333333	25.66666667	0.8828	2.1487	1.8301	2.1337	2.3284	1.2395	1.620533333	1.900533333	0.229935632	0.726973514	1	no	-	--	-	-	-	-
Unigene0000954	65.33333333	92.66666667	1.7416	2.3972	1.7429	2.8093	2.687	1.4756	1.960566667	2.323966667	0.245318676	0.657051249	1	no	-	--	-	-	-	-
Unigene0000955	73.33333333	127	1.8759	2.4751	1.0489	3.2137	2.7435	1.8483	1.799966667	2.601833333	0.53155836	0.32720385	1	no	-	--	-	-	-	-
Unigene0000956	7.666666667	4	0.7567	0.4018	0.4278	0.4291	0.2592	0	0.528766667	0.229433333	-1.204556223	0.250483346	1	no	-	--	-	-	-	-
Unigene0000957	6757	6759	137.0838	130.3327	130.4386	97.7794	110.5923	120.1962	132.6183667	109.5226333	-0.276051552	0.456359281	1	no	mtpn	myotrophin [Danio rerio]	-	GO:0043232//intracellular non-membrane-bounded organelle;GO:0015629//actin cytoskeleton;GO:0043227//membrane-bounded organelle;GO:0005856//cytoskeleton;GO:0043005//neuron projection;GO:0043228//non-membrane-bounded organelle;GO:0043229//intracellular organelle;GO:0044444//cytoplasmic part;GO:0005622//intracellular;GO:0005623//cell;GO:0044424//intracellular part;GO:0044464//cell part;GO:0097458//n…	-	GO:0014896//muscle hypertrophy;GO:0051252//regulation of RNA metabolic process;GO:0065007//biological regulation;GO:0014897//striated muscle hypertrophy;GO:0003300//cardiac muscle hypertrophy;GO:0051171//regulation of nitrogen compound metabolic process;GO:0010604//positive regulation of macromolecule metabolic process;GO:0080090//regulation of primary metabolic process;GO:1903508//positive regul…
Unigene0000958	84.33333333	99.33333333	1.977	0.859	1.3209	1.2611	1.2774	1.4784	1.385633333	1.338966667	-0.049425496	0.928091956	1	no	-	--	-	-	-	-
Unigene0000959	17.33333333	10.33333333	1.1866	0.231	1.0823	0.074	0.4471	0.7034	0.8333	0.408166667	-1.029677612	0.235462423	1	no	-	--	-	-	-	-
Unigene0000960	18	31	1.7657	2.8312	0.9689	3.4009	2.1523	2.3494	1.855266667	2.6342	0.505738318	0.454419758	1	no	-	--	-	-	-	-
Unigene0000961	11.66666667	57.66666667	0.4268	0.0875	0.2794	2.1192	0.6348	0.3855	0.264566667	1.0465	1.983869102	0.01249936	0.968433904	no	foxa1	hepatocyte nuclear factor 3-alpha [Danio rerio]	-	-	-	-
Unigene0000962	100.6666667	72.66666667	1.6618	28.2113	0.7536	13.5228	2.5436	2.0254	10.2089	6.0306	-0.759453974	0.472616604	1	no	IGKV4-1	PREDICTED: polymeric immunoglobulin receptor-like [Sinocyclocheilus anshuiensis]	-	GO:0016020//membrane;GO:0031224//intrinsic component of membrane;GO:0044425//membrane part	-	-
Unigene0000963	55.33333333	47	1.1688	0.9558	1.7929	0.3827	0.8807	1.4587	1.305833333	0.907366667	-0.525213208	0.408850291	1	no	-	PREDICTED: uncharacterized protein LOC108257802 isoform X2 [Ictalurus punctatus]	-	-	-	-
Unigene0000964	61.66666667	34.66666667	4.3568	5.3578	11.7648	2.3241	3.0239	4.4716	7.1598	3.2732	-1.129217531	0.065300169	1	no	-	--	-	-	-	-
Unigene0000965	1500.666667	1966.666667	28.5136	32.0752	23.9467	35.5859	29.8832	26.0945	28.1785	30.5212	0.11521687	0.77381568	1	no	TIA1	TIA1 cytotoxic granule-associated RNA binding protein 1 [Danio rerio]	-	-	GO:0005488//binding;GO:0097159//organic cyclic compound binding	-
Unigene0000966	22.66666667	44.33333333	0.7682	1.0405	0.45	1.38	1.8246	0.5731	0.7529	1.259233333	0.742015472	0.251981867	1	no	-	--	-	-	-	-
Unigene0000967	43.33333333	47.66666667	5.7902	2.7142	5.5569	3.9291	4.242	4.5165	4.6871	4.2292	-0.148310788	0.805210952	1	no	-	--	-	-	-	-
Unigene0000968	201.6666667	218.3333333	9.0911	13.148	9.5316	10.3653	12.028	6.5173	10.59023333	9.636866667	-0.136098327	0.783005468	1	no	-	--	-	-	-	-
Unigene0000969	4530	4149	113.4687	149.4977	101.9733	100.413	95.9378	81.1458	121.6465667	92.49886667	-0.395188008	0.30583111	1	no	tma7	PREDICTED: translation machinery-associated protein 7 [Cyprinodon variegatus]	-	-	-	-
Unigene0000970	31.66666667	31.33333333	1.8266	1.8338	1.7749	1.2905	1.9893	1.2466	1.811766667	1.5088	-0.263995585	0.665549667	1	no	-	--	-	-	-	-
Unigene0000971	40.33333333	36.33333333	1.6681	1.5577	0.8821	1.2739	0.8016	0.9559	1.3693	1.010466667	-0.438416831	0.462808823	1	no	-	--	-	-	-	-
Unigene0000972	1437.333333	1552	18.0117	15.0842	19.3714	14.1747	14.4345	17.8262	17.4891	15.47846667	-0.176193487	0.660885201	1	no	ZNF180	PREDICTED: zinc finger and SCAN domain-containing protein 5A-like isoform X1 [Sinocyclocheilus anshuiensis]	-	-	-	-
Unigene0000973	28367.66667	34599	1362.972	2129.2615	1388.0393	1526.921	1877.2383	1569.212	1626.7576	1657.790433	0.027262349	0.943416564	1	no	rpl35	PREDICTED: 60S ribosomal protein L35 isoform X1 [Cyprinus carpio]	ko03010//Ribosome//Translation//Genetic Information Processing	GO:0032991//macromolecular complex;GO:1990904//ribonucleoprotein complex;GO:0005622//intracellular;GO:0044464//cell part;GO:0030529//intracellular ribonucleoprotein complex;GO:0044424//intracellular part;GO:0005623//cell	-	GO:0043170//macromolecule metabolic process;GO:0007275//multicellular organism development;GO:0032502//developmental process;GO:0044707//single-multicellular organism process;GO:0009987//cellular process;GO:0008152//metabolic process;GO:0010467//gene expression;GO:0044767//single-organism developmental process;GO:0007049//cell cycle;GO:0071704//organic substance metabolic process;GO:0032501//mult…
Unigene0000974	12	10	1.6375	0.4852	0.4428	0.4996	0.7377	0.5553	0.855166667	0.597533333	-0.517186424	0.523863074	1	no	-	--	-	-	-	-
Unigene0000975	6.666666667	14	0.372	0.4346	0.694	1.102	1.0511	0.4642	0.5002	0.872433333	0.802539835	0.287823131	1	no	-	--	-	-	-	-
Unigene0000976	2720.666667	4527	8.8889	8.4229	7.8847	11.3668	12.6534	10.7884	8.398833333	11.60286667	0.466220445	0.215835278	1	no	Ubr3	PREDICTED: E3 ubiquitin-protein ligase UBR3-like isoform X2 [Sinocyclocheilus anshuiensis]	-	-	GO:0043169//cation binding;GO:0046914//transition metal ion binding;GO:0046872//metal ion binding;GO:0043167//ion binding;GO:0005488//binding	GO:0044260//cellular macromolecule metabolic process;GO:0008152//metabolic process;GO:0043170//macromolecule metabolic process;GO:0032446//protein modification by small protein conjugation;GO:0009987//cellular process;GO:0019538//protein metabolic process;GO:0070647//protein modification by small protein conjugation or removal;GO:0044237//cellular metabolic process;GO:0006464//cellular protein mo…
Unigene0000977	631	674.3333333	6.2932	6.6308	3.9322	5.5467	5.2383	4.1986	5.618733333	4.994533333	-0.169895046	0.695643679	1	no	Srm	spermidine synthase [Danio rerio]	ko01100//Metabolic pathways//Global and Overview//Metabolism;ko00480//Glutathione metabolism//Metabolism of other amino acids//Metabolism;ko00330//Arginine and proline metabolism//Amino acid metabolism//Metabolism;ko00270//Cysteine and methionine metabolism//Amino acid metabolism//Metabolism;ko00410//beta-Alanine metabolism//Metabolism of other amino acids//Metabolism	-	GO:0003824//catalytic activity	-
Unigene0000978	30.66666667	25.66666667	0.486	1.0941	1.2277	1.0419	0.3147	0.5212	0.935933333	0.625933333	-0.580396763	0.400925558	1	no	-	--	-	-	-	-
Unigene0000979	1810.333333	2263.333333	28.4634	39.8913	28.3563	33.5296	37.0174	30.1957	32.237	33.5809	0.058923405	0.882523897	1	no	PTTG1IP	PREDICTED: pituitary tumor-transforming gene 1 protein-interacting protein-like [Sinocyclocheilus anshuiensis]	-	-	-	-
Unigene0000980	6.333333333	7.333333333	0.0777	0.983	0.4025	1.09	0.2926	0	0.487733333	0.460866667	-0.081743149	1	1	no	-	--	-	-	-	-
Unigene0000981	10.33333333	10	0.4997	0.1737	0.444	0.2783	0.0672	0.5012	0.372466667	0.282233333	-0.400222931	0.680660276	1	no	-	PREDICTED: pleckstrin homology domain-containing family S member 1-like [Sinocyclocheilus grahami]	-	-	-	-
Unigene0000982	173	200	4.2405	9.831	4.4697	5.6875	7.7515	4.7092	6.1804	6.0494	-0.030908155	0.956275349	1	no	-	--	-	-	-	-
Unigene0000983	113.3333333	168	1.8373	1.8039	1.6622	2.4642	2.4199	1.6517	1.7678	2.1786	0.301446271	0.533225092	1	no	-	--	-	-	-	-
Unigene0000984	8.333333333	12.33333333	0.6645	0.2773	1.4759	1.6282	0.1788	0.9626	0.8059	0.9232	0.196042391	0.870447041	1	no	-	--	-	-	-	-
Unigene0000985	284.3333333	475	1.229	4.6117	0.6933	3.026	3.4728	2.7424	2.178	3.0804	0.500113748	0.415487926	1	no	c3	PREDICTED: complement C3-like [Sinocyclocheilus rhinocerous]	ko04145//Phagosome//Transport and catabolism//Cellular Processes	-	-	GO:0019538//protein metabolic process;GO:0050789//regulation of biological process;GO:0065007//biological regulation;GO:0050896//response to stimulus;GO:0006955//immune response;GO:0044238//primary metabolic process;GO:0006950//response to stress;GO:0008152//metabolic process;GO:0006952//defense response;GO:0043170//macromolecule metabolic process;GO:0002376//immune system process;GO:0071704//org…
Unigene0000986	43.66666667	12	3.1462	0.6683	3.7945	0.4014	0.8621	0.4908	2.536333333	0.584766667	-2.116811381	0.004281873	0.720335978	no	-	--	-	-	-	-
Unigene0000987	67.33333333	98.66666667	1.6804	1.8557	1.5337	1.095	2.2679	2.8171	1.689933333	2.06	0.285678003	0.609490878	1	no	-	PREDICTED: uncharacterized protein LOC109045355 [Cyprinus carpio]	-	-	-	-
Unigene0000988	263	414.3333333	2.6051	1.5428	1.5751	2.33	2.6037	2.5287	1.907666667	2.487466667	0.382868087	0.401094601	1	no	Rasl10b	PREDICTED: ras-like protein family member 10B [Cyprinus carpio]	-	-	GO:0032550//purine ribonucleoside binding;GO:0032549//ribonucleoside binding;GO:0001882//nucleoside binding;GO:1901363//heterocyclic compound binding;GO:0097159//organic cyclic compound binding;GO:0001883//purine nucleoside binding;GO:0097367//carbohydrate derivative binding;GO:0036094//small molecule binding;GO:0005488//binding	GO:0009154//purine ribonucleotide catabolic process;GO:0050794//regulation of cellular process;GO:0044281//small molecule metabolic process;GO:0072521//purine-containing compound metabolic process;GO:0007154//cell communication;GO:0046700//heterocycle catabolic process;GO:0051716//cellular response to stimulus;GO:1901575//organic substance catabolic process;GO:0007165//signal transduction;GO:0009…
Unigene0000989	20	19	1.4081	1.0444	1.5984	0.9932	0.6947	1.4121	1.3503	1.033333333	-0.385974256	0.576310764	1	no	tc1a	PREDICTED: forkhead box protein N1 isoform X1 [Oreochromis niloticus]	-	-	GO:0016757//transferase activity, transferring glycosyl groups;GO:0003824//catalytic activity;GO:0016740//transferase activity	-
Unigene0000990	9	12.33333333	0.6929	0.9744	0.399	1.3205	0.2176	0.7207	0.688766667	0.752933333	0.128506806	0.905400942	1	no	-	putative nuclease HARBI1, partial [Larimichthys crocea]	-	-	-	-
Unigene0000991	52.33333333	68.66666667	1.303	1.3788	1.7909	1.3471	1.3874	2.0548	1.4909	1.596433333	0.098668813	0.866153563	1	no	-	putative nuclease HARBI1, partial [Larimichthys crocea]	-	-	-	-
Unigene0000992	8.333333333	3.666666667	0.5662	0.1837	0.8477	0.2452	0.237	0.0981	0.532533333	0.193433333	-1.461035404	0.121528227	1	no	-	--	-	-	-	-
Unigene0000993	13.33333333	18	1.274	0.4569	0.973	0.8887	1.1368	0.9937	0.9013	1.0064	0.159124532	0.850051088	1	no	-	--	-	-	-	-
Unigene0000994	478.3333333	522.6666667	15.831	26.3688	11.3148	18.923	14.5229	14.9234	17.8382	16.1231	-0.145840886	0.754751783	1	no	Tuba1a	PREDICTED: tubulin alpha-1 chain-like [Astyanax mexicanus]	ko04145//Phagosome//Transport and catabolism//Cellular Processes;ko04540//Gap junction//Cellular commiunity//Cellular Processes	GO:0043227//membrane-bounded organelle;GO:0043229//intracellular organelle;GO:0043232//intracellular non-membrane-bounded organelle;GO:0044446//intracellular organelle part;GO:0005856//cytoskeleton;GO:0005737//cytoplasm;GO:0044422//organelle part;GO:0043228//non-membrane-bounded organelle;GO:0099513//polymeric cytoskeletal fiber;GO:0099512//supramolecular fiber;GO:0005622//intracellular;GO:004446…	GO:0005515//protein binding;GO:0005198//structural molecule activity;GO:0001882//nucleoside binding;GO:0097367//carbohydrate derivative binding;GO:0016818//hydrolase activity, acting on acid anhydrides, in phosphorus-containing anhydrides;GO:0016787//hydrolase activity;GO:0003824//catalytic activity;GO:0001883//purine nucleoside binding;GO:0016462//pyrophosphatase activity;GO:0097159//organic cyc…	GO:0044710//single-organism metabolic process;GO:0009056//catabolic process;GO:0044712//single-organism catabolic process;GO:0032502//developmental process;GO:0043623//cellular protein complex assembly;GO:0034097//response to cytokine;GO:0044772//mitotic cell cycle phase transition;GO:1901565//organonitrogen compound catabolic process;GO:1901292//nucleoside phosphate catabolic process;GO:0051649/…
Unigene0000995	806.3333333	880	16.8235	15.9492	18.2427	12.3793	14.8376	18.5781	17.00513333	15.265	-0.155742728	0.709582569	1	no	POLR3GL	PREDICTED: DNA-directed RNA polymerase III subunit RPC7-like isoform X1 [Sinocyclocheilus grahami]	ko01100//Metabolic pathways//Global and Overview//Metabolism;ko00230//Purine metabolism//Nucleotide metabolism//Metabolism;ko00240//Pyrimidine metabolism//Nucleotide metabolism//Metabolism;ko04623//Cytosolic DNA-sensing pathway//Immune system//Organismal Systems;ko03020//RNA polymerase//Transcription//Genetic Information Processing	-	-	-
Unigene0000996	29	28	1.7185	0.6397	2.0955	0.4729	1.3806	1.6953	1.484566667	1.182933333	-0.327673111	0.656872724	1	no	-	--	-	-	-	-
Unigene0000997	309	361.6666667	3.7819	4.409	2.7771	4.2795	3.5734	2.7927	3.656	3.548533333	-0.043043212	0.926726609	1	no	mul1a	LOC402879 protein, partial [Danio rerio]	-	-	-	GO:0008152//metabolic process;GO:0036211//protein modification process;GO:0071840//cellular component organization or biogenesis;GO:0006996//organelle organization;GO:0019538//protein metabolic process;GO:0044238//primary metabolic process;GO:0016043//cellular component organization;GO:0044260//cellular macromolecule metabolic process;GO:0043412//macromolecule modification;GO:0043170//macromolecu…
Unigene0000998	2250.666667	1967.333333	56.2038	46.9637	78.7801	42.7766	37.7098	49.0098	60.6492	43.1654	-0.490613258	0.227803847	1	no	-	PREDICTED: small kinetochore-associated protein-like [Sinocyclocheilus grahami]	-	-	-	-
Unigene0000999	26	33	0.442	0.7613	1.48	1.1663	0.9287	0.6895	0.894433333	0.928166667	0.053409932	0.937599244	1	no	-	--	-	-	-	-
Unigene0001000	267.6666667	296	26.485	42.7344	14.8739	27.8879	27.1334	22.7164	28.0311	25.91256667	-0.113376437	0.822905178	1	no	-	--	-	-	-	-
Unigene0001001	45.66666667	41	0.9058	0.2998	1.3144	0.3955	0.7508	0.7207	0.84	0.622333333	-0.432701806	0.512685604	1	no	KCTD16	PREDICTED: BTB/POZ domain-containing protein KCTD16-like [Cyprinus carpio]	-	-	-	GO:1902578//single-organism localization;GO:0044765//single-organism transport;GO:0044699//single-organism process;GO:0051234//establishment of localization;GO:0006810//transport;GO:0051179//localization
Unigene0001002	355.6666667	467	31.9571	20.4571	25.7874	32.9922	16.5625	33.0084	26.0672	27.52103333	0.078299015	0.86860509	1	no	-	PREDICTED: uncharacterized protein LOC109096714 isoform X3 [Cyprinus carpio]	-	-	-	-
Unigene0001003	16.33333333	15.33333333	1.4211	1.0691	0.6695	0.5036	0.4868	1.4108	1.053233333	0.8004	-0.396032014	0.600856761	1	no	-	PREDICTED: uncharacterized protein LOC109096714 isoform X4 [Cyprinus carpio]	-	-	-	-
Unigene0001004	35.66666667	40.33333333	1.4667	1.6319	1.3899	1.993	1.5	0.7191	1.496166667	1.404033333	-0.091693707	0.895915858	1	no	-	--	-	-	-	-
Unigene0001005	45	33	3.5791	1.0136	4.3166	0.9639	0.4904	3.6546	2.969766667	1.702966667	-0.802299387	0.305943819	1	no	-	--	-	-	-	-
Unigene0001006	31.33333333	35.33333333	2.9577	2.3559	0.9754	1.8867	2.4694	1.6254	2.096333333	1.993833333	-0.072323317	0.905153245	1	no	-	--	-	-	-	-
Unigene0001007	138.3333333	222	1.3121	2.1791	1.0628	2.1061	2.5445	1.5137	1.518	2.054766667	0.436802784	0.388137595	1	no	GABRD	PREDICTED: gamma-aminobutyric acid receptor subunit delta-like [Sinocyclocheilus anshuiensis]	ko04080//Neuroactive ligand-receptor interaction//Signaling molecules and interaction//Environmental Information Processing	GO:0016020//membrane;GO:0044425//membrane part;GO:0031224//intrinsic component of membrane	GO:0004872//receptor activity;GO:0022891//substrate-specific transmembrane transporter activity;GO:0005215//transporter activity;GO:0022892//substrate-specific transporter activity;GO:0060089//molecular transducer activity;GO:0015267//channel activity;GO:0022803//passive transmembrane transporter activity;GO:0099600//transmembrane receptor activity;GO:0022836//gated channel activity;GO:0022834//l…	GO:0006810//transport;GO:0051179//localization;GO:0006811//ion transport;GO:0009987//cellular process;GO:0044699//single-organism process;GO:0007154//cell communication;GO:0044765//single-organism transport;GO:1902578//single-organism localization;GO:0044763//single-organism cellular process;GO:0051234//establishment of localization
Unigene0001008	12	14.66666667	0.443	0.2464	0.4592	0.6167	0.3577	0.1728	0.382866667	0.3824	-0.001759538	1	1	no	-	--	-	-	-	-
Unigene0001009	1886	2099.333333	7.1996	6.7218	8.7728	5.7872	7.1159	7.9119	7.564733333	6.938333333	-0.124700074	0.753262062	1	no	XYLT2	PREDICTED: xylosyltransferase 2-like [Sinocyclocheilus anshuiensis]	ko01100//Metabolic pathways//Global and Overview//Metabolism;ko00534//Glycosaminoglycan biosynthesis - heparan sulfate / heparin//Glycan biosynthesis and metabolism//Metabolism;ko00532//Glycosaminoglycan biosynthesis - chondroitin sulfate / dermatan sulfate//Glycan biosynthesis and metabolism//Metabolism	-	GO:0003824//catalytic activity;GO:0008194//UDP-glycosyltransferase activity;GO:0016740//transferase activity;GO:0016757//transferase activity, transferring glycosyl groups	GO:0006022//aminoglycan metabolic process;GO:0006807//nitrogen compound metabolic process;GO:0044711//single-organism biosynthetic process;GO:0009058//biosynthetic process;GO:0043170//macromolecule metabolic process;GO:1901566//organonitrogen compound biosynthetic process;GO:0044710//single-organism metabolic process;GO:0008152//metabolic process;GO:1901576//organic substance biosynthetic process…
Unigene0001010	1576.666667	1680	14.7352	7.016	19.9276	9.7441	11.6823	14.7931	13.89293333	12.07316667	-0.20254711	0.661578562	1	no	-	PREDICTED: uncharacterized protein LOC101882312 [Danio rerio]	-	-	-	-
Unigene0001011	21	25.33333333	1.2107	1.1787	0.7843	1.1799	0.8078	1.1411	1.0579	1.042933333	-0.02055632	1	1	no	-	--	-	-	-	-
Unigene0001012	247	351	8.839	8.4188	6.3832	8.6077	9.588	9.6573	7.880333333	9.284333333	0.236541664	0.597766265	1	no	lipB	hypothetical protein cypCar_00048681 [Cyprinus carpio]	ko01100//Metabolic pathways//Global and Overview//Metabolism;ko00785//Lipoic acid metabolism//Metabolism of cofactors and vitamins//Metabolism	GO:0043229//intracellular organelle;GO:0005623//cell;GO:0044464//cell part;GO:0043231//intracellular membrane-bounded organelle;GO:0043227//membrane-bounded organelle;GO:0043226//organelle;GO:0044424//intracellular part;GO:0005622//intracellular	GO:0016746//transferase activity, transferring acyl groups;GO:0016747//transferase activity, transferring acyl groups other than amino-acyl groups;GO:0003824//catalytic activity;GO:0016740//transferase activity	GO:0044237//cellular metabolic process;GO:0006633//fatty acid biosynthetic process;GO:0044249//cellular biosynthetic process;GO:0006082//organic acid metabolic process;GO:0008610//lipid biosynthetic process;GO:0044699//single-organism process;GO:1901576//organic substance biosynthetic process;GO:0072330//monocarboxylic acid biosynthetic process;GO:0008152//metabolic process;GO:0071704//organic su…
Unigene0001013	0	0.333333333	0	0	0	0.0748	0	0	0.001	0.024933333	4.640003864	1	1	no	-	--	-	-	-	-
Unigene0001014	459.6666667	678	4.0721	5.0038	2.2819	7.1431	3.0794	3.4345	3.785933333	4.552333333	0.265957192	0.59299699	1	no	Phactr2	PREDICTED: phosphatase and actin regulator 2 isoform X3 [Sinocyclocheilus rhinocerous]	-	-	-	-
Unigene0001015	14	17	1.923	0.7659	0.9966	0.6815	1.8937	1.2273	1.2285	1.2675	0.04508789	0.964669486	1	no	Tf2-9	Pol polyprotein [Dicentrarchus labrax]	ko03013//RNA transport//Translation//Genetic Information Processing	-	-	-
Unigene0001016	1527.666667	2585.333333	10.9461	7.9895	9.3929	10.8187	11.679	16.7498	9.442833333	13.0825	0.470346547	0.247153858	1	no	Tf2-9	PREDICTED: LOW QUALITY PROTEIN: retrotransposon-like protein 1 [Maylandia zebra]	-	-	-	-
Unigene0001017	6	12	0.4837	0.8242	0.8774	0.8486	1.7087	1.132	0.728433333	1.229766667	0.755515761	0.365203116	1	no	Tf2-9	PREDICTED: RNA-directed DNA polymerase homolog, partial [Danio rerio]	-	-	-	-
Unigene0001018	163.3333333	348	1.5915	1.7053	1.6184	3.0669	3.0264	2.5765	1.6384	2.889933333	0.818748592	0.069066464	1	no	Tf2-6	Pol polyprotein [Dicentrarchus labrax]	-	-	-	-
Unigene0001019	169.3333333	191	3.8629	3.3103	4.6511	1.9116	3.9436	5.1602	3.941433333	3.6718	-0.102232894	0.847403513	1	no	Tf2-6	Retrotransposable element Tf2 protein type 1 [Larimichthys crocea]	-	-	-	-
Unigene0001020	0.666666667	1.333333333	0.1255	0.1222	0	0	0.1182	0.2937	0.082566667	0.1373	0.733700258	0.752957871	1	no	-	--	-	-	-	-
Unigene0001021	367	414.6666667	3.6633	3.191	4.3859	2.049	3.7086	4.7254	3.746733333	3.494333333	-0.100616063	0.832192026	1	no	PEG10	Pol polyprotein [Dicentrarchus labrax]	-	-	-	-
Unigene0001022	4	8	0.1209	0.4709	0.8774	1.0371	0.6835	0.6603	0.489733333	0.793633333	0.696476226	0.44016533	1	no	-	PREDICTED: copine-8-like [Sinocyclocheilus rhinocerous]	-	-	-	-
Unigene0001023	24.66666667	34.66666667	1.6117	1.046	1.3364	1.3822	1.2651	1.9276	1.331366667	1.524966667	0.195869755	0.77262897	1	no	Tf2-8	Retrotransposable element Tf2 protein type 1 [Larimichthys crocea]	-	-	-	-
Unigene0001024	73.33333333	105	1.1335	0.9196	2.1538	1.517	1.5303	1.8566	1.4023	1.634633333	0.221172035	0.689710298	1	no	Tf2-9	Retrotransposable element Tf2 protein type 1 [Larimichthys crocea]	ko03013//RNA transport//Translation//Genetic Information Processing	-	-	-
Unigene0001025	2236.666667	3695	21.5296	25.1657	19.9579	32.3317	34.0669	25.3064	22.21773333	30.56833333	0.460326255	0.235976988	1	no	-	PREDICTED: FHA domain-containing protein FhaA-like [Sinocyclocheilus grahami]	-	GO:0016020//membrane	-	GO:0022607//cellular component assembly;GO:0009966//regulation of signal transduction;GO:0048583//regulation of response to stimulus;GO:0007275//multicellular organism development;GO:0065007//biological regulation;GO:0048513//animal organ development;GO:0098609//cell-cell adhesion;GO:0070271//protein complex biogenesis;GO:0022037//metencephalon development;GO:0006461//protein complex assembly;GO:…
Unigene0001026	5	19.33333333	0.5576	0.2036	0.289	2.1192	0.2626	0.8155	0.350066667	1.065766667	1.606190017	0.07894828	1	no	-	--	-	-	-	-
Unigene0001027	29	51	0.9029	0.9767	1.0398	1.095	1.1969	1.9042	0.973133333	1.3987	0.523377166	0.356531463	1	no	-	--	-	-	-	-
Unigene0001028	8	3.333333333	0.1877	0.0609	0.1297	0.0244	0.0589	0.0488	0.1261	0.044033333	-1.51790031	0.104472957	1	no	-	PREDICTED: uncharacterized protein LOC109083040 [Cyprinus carpio]	-	-	-	-
Unigene0001029	2	2.333333333	0.344	0.1116	0.2377	0.1788	0.216	0.2683	0.2311	0.221033333	-0.064253306	1	1	no	-	--	-	-	-	-
Unigene0001030	5	9.333333333	0.2123	0.155	0.0275	0.2897	0.125	0.1863	0.1316	0.200333333	0.606243001	0.505982675	1	no	SYT14	PREDICTED: synaptotagmin-14-like [Sinocyclocheilus grahami]	-	-	-	-
Unigene0001031	4.666666667	2	0.3485	0.1696	0.0903	0	0.0821	0.1359	0.2028	0.072666667	-1.480692018	0.205585719	1	no	-	--	-	-	-	-
Unigene0001032	6039.333333	6263	105.8883	118.5449	87.4224	97.3223	85.5136	84.1931	103.9518667	89.00966667	-0.223881735	0.551420362	1	no	txn	PREDICTED: thioredoxin-like [Sinocyclocheilus anshuiensis]	-	-	GO:0003824//catalytic activity;GO:0016491//oxidoreductase activity;GO:0015036//disulfide oxidoreductase activity;GO:0016667//oxidoreductase activity, acting on a sulfur group of donors	GO:0044281//small molecule metabolic process;GO:0009987//cellular process;GO:0018904//ether metabolic process;GO:0042592//homeostatic process;GO:0065007//biological regulation;GO:0044763//single-organism cellular process;GO:0019725//cellular homeostasis;GO:0008152//metabolic process;GO:0044699//single-organism process;GO:0044710//single-organism metabolic process;GO:0065008//regulation of biologi…
Unigene0001033	20	18.33333333	0.7334	0.5025	0.3942	0.2965	0.4861	0.4661	0.543366667	0.416233333	-0.384533559	0.546768785	1	no	-	--	-	-	-	-
Unigene0001034	15.66666667	20	0.2024	0.563	0.5994	0.5636	0.5447	0.3383	0.454933333	0.4822	0.083976505	0.935151361	1	no	-	--	-	-	-	-
Unigene0001035	150.6666667	261	1.3073	0.6853	0.8599	1.9845	1.0123	1.0148	0.950833333	1.3372	0.491950874	0.335255765	1	no	Tf2-9	Pol polyprotein [Dicentrarchus labrax]	-	-	-	-
Unigene0001036	70.33333333	79	1.361	1.5516	0.8538	1.1867	1.0289	1.2711	1.255466667	1.162233333	-0.111323987	0.840914486	1	no	CALB1	PREDICTED: calbindin-like [Sinocyclocheilus anshuiensis]	-	-	-	-
Unigene0001037	2395	2482	13.0115	10.975	17.8379	9.7525	10.6511	14.9647	13.94146667	11.78943333	-0.241887967	0.55540656	1	no	cep162	PREDICTED: centrosomal protein of 162 kDa isoform X2 [Sinocyclocheilus rhinocerous]	-	-	-	-
Unigene0001038	23	21	1.259	1.4009	0.4195	0.7713	0.5506	0.9821	1.026466667	0.768	-0.418508562	0.543565523	1	no	-	PREDICTED: uncharacterized protein LOC107676182 [Sinocyclocheilus anshuiensis]	-	-	-	-
Unigene0001039	126	125	2.8472	2.8585	5.6255	2.1273	3.8272	3.3776	3.777066667	3.1107	-0.280026982	0.602561004	1	no	CEP128	PREDICTED: centrosomal protein of 128 kDa-like [Sinocyclocheilus rhinocerous]	-	-	-	-
Unigene0001040	1.333333333	8.333333333	0	0.0847	0.0902	0.1356	0.4096	0.3731	0.0583	0.3061	2.392435256	0.045087365	1	no	-	--	-	-	-	-
Unigene0001041	39.66666667	35.33333333	4.3971	2.688	5.1935	1.8337	2.408	4.6263	4.092866667	2.956	-0.469465399	0.453227858	1	no	-	--	-	-	-	-
Unigene0001042	2713	1718.666667	39.9797	19.967	66.2281	9.6392	11.876	41.985	42.05826667	21.16673333	-0.990590759	0.093354125	1	no	SPATA22	PREDICTED: spermatogenesis-associated protein 22-like [Sinocyclocheilus rhinocerous]	-	-	-	-
Unigene0001043	17402	21276.66667	331.0401	521.3396	314.2947	373.5963	466.3503	355.6378	388.8914667	398.5281333	0.035313994	0.927964021	1	no	rpl27	ribosomal protein L27, partial [Hypophthalmichthys nobilis]	ko03010//Ribosome//Translation//Genetic Information Processing	GO:0030529//intracellular ribonucleoprotein complex;GO:0005622//intracellular;GO:0032991//macromolecular complex;GO:0005623//cell;GO:0044464//cell part;GO:0044424//intracellular part;GO:1990904//ribonucleoprotein complex	-	GO:0043170//macromolecule metabolic process;GO:0008152//metabolic process;GO:0010467//gene expression;GO:0071704//organic substance metabolic process
Unigene0001044	34.33333333	34.33333333	1.3198	1.4601	0.2798	1.2862	0.7628	0.4913	1.0199	0.846766667	-0.268391321	0.712100176	1	no	Cd22	PREDICTED: B-cell receptor CD22-like isoform X1 [Cyprinus carpio]	-	-	-	-
Unigene0001045	169.3333333	270	2.4674	3.7704	1.651	2.6785	2.986	4.714	2.6296	3.4595	0.395720179	0.438982824	1	no	SIGLEC14	PREDICTED: B-cell receptor CD22-like isoform X4 [Cyprinus carpio]	-	-	-	-
Unigene0001046	199.6666667	281.3333333	1.6091	4.764	1.4491	3.959	3.429	1.8827	2.6074	3.090233333	0.245103852	0.6685854	1	no	CEACAM5	PREDICTED: titin-like [Sinocyclocheilus anshuiensis]	-	-	-	-
Unigene0001047	1297	2170.333333	6.7231	6.2161	3.8953	8.6616	8.4109	6.3836	5.6115	7.8187	0.478542287	0.251478698	1	no	Arhgap39	PREDICTED: rho GTPase-activating protein 39-like [Sinocyclocheilus anshuiensis]	-	GO:0005623//cell;GO:0044464//cell part	-	GO:0044763//single-organism cellular process;GO:0044699//single-organism process;GO:0009987//cellular process;GO:0007154//cell communication
Unigene0001048	326.3333333	518.6666667	3.3084	3.1699	2.0539	4.3353	3.6837	3.2071	2.844066667	3.742033333	0.395867127	0.373929944	1	no	Cdk14	PREDICTED: cyclin-dependent kinase 14 isoform X1 [Lates calcarifer]	-	-	-	-
Unigene0001049	14.33333333	12	1.0114	1.2923	0.3931	0.6899	0.4168	0.7396	0.898933333	0.615433333	-0.546611541	0.465180171	1	no	-	--	-	-	-	-
Unigene0001050	42.33333333	39.66666667	1.6236	1.6794	3.2079	2.0174	1.8638	1.1477	2.1703	1.6763	-0.372614115	0.529178576	1	no	-	--	-	-	-	-
Unigene0001051	9.666666667	4.666666667	1.1837	0.2161	0.7668	0	0.2787	0.5771	0.7222	0.285266667	-1.340087242	0.224405008	1	no	-	--	-	-	-	-
Unigene0001052	3.666666667	12.33333333	0.2053	0.4997	0.4256	1.0404	0.8702	1.2011	0.376866667	1.037233333	1.460614374	0.07510805	1	no	-	--	-	-	-	-
Unigene0001053	1827.666667	1637.666667	43.5546	32.7307	48.3262	25.1726	27.4139	38.6405	41.53716667	30.409	-0.449904436	0.275511348	1	no	CHCHD7	PREDICTED: coiled-coil-helix-coiled-coil-helix domain-containing protein 7-like [Sinocyclocheilus rhinocerous]	-	-	-	-
Unigene0001054	26	40	0.3983	0.4847	1.7544	2.0959	0.0625	0.9579	0.879133333	1.038766667	0.240717732	0.799895678	1	no	-	RNA-directed DNA polymerase from mobile element jockey [Larimichthys crocea]	-	-	-	-
Unigene0001055	591.6666667	698	8.6571	11.0463	7.0624	9.541	9.3213	7.4126	8.921933333	8.7583	-0.0267055	0.951164986	1	no	NDUFV3	PREDICTED: fibrous sheath CABYR-binding protein-like isoform X3 [Sinocyclocheilus rhinocerous]	ko01100//Metabolic pathways//Global and Overview//Metabolism;ko00190//Oxidative phosphorylation//Energy metabolism//Metabolism	-	-	-
Unigene0001056	1.666666667	2.666666667	0.0752	0.293	0	0.2346	0.0709	0.1761	0.122733333	0.160533333	0.387345765	0.845460928	1	no	BTN1A1	PREDICTED: E3 ubiquitin-protein ligase TRIM21-like isoform X2 [Sinocyclocheilus rhinocerous]	-	GO:0005623//cell;GO:0044464//cell part	GO:0046914//transition metal ion binding;GO:0043169//cation binding;GO:0043167//ion binding;GO:0005488//binding;GO:0046872//metal ion binding	-
Unigene0001057	2443	2140.666667	356.6016	77.5581	346.1894	177.8893	183.5377	196.5039	260.1163667	185.9769667	-0.484033223	0.347591363	1	no	-	--	-	-	-	-
Unigene0001058	2008	2074.333333	16.5441	9.8608	17.4621	13.6306	11.0308	12.2961	14.62233333	12.31916667	-0.247268877	0.547494893	1	no	Trim39	PREDICTED: E3 ubiquitin-protein ligase TRIM39-like isoform X1 [Sinocyclocheilus rhinocerous]	-	GO:0005623//cell;GO:0044464//cell part	GO:0005488//binding;GO:0043169//cation binding;GO:0043167//ion binding;GO:0046914//transition metal ion binding;GO:0046872//metal ion binding	-
Unigene0001059	1.333333333	2	0	0	0.4556	0.1714	0	0.3429	0.151866667	0.171433333	0.174842407	1	1	no	-	PREDICTED: S-antigen protein-like [Cavia porcellus]	-	-	-	-
Unigene0001060	3.333333333	6	0.4255	0.3107	0.3307	0.0829	0.3006	1.1615	0.355633333	0.515	0.534181879	0.677154964	1	no	-	--	-	-	-	-
Unigene0001061	12.66666667	20	1.2655	0.704	1.499	1.7618	1.192	1.4807	1.156166667	1.478166667	0.354459562	0.604364725	1	no	-	--	-	-	-	-
Unigene0001062	347	474.3333333	4.2483	4.5006	2.3514	3.6208	5.3321	3.8396	3.7001	4.264166667	0.204699566	0.659161755	1	no	TRIB2	PREDICTED: tribbles homolog 2-like [Cyprinus carpio]	-	-	GO:0001882//nucleoside binding;GO:0016772//transferase activity, transferring phosphorus-containing groups;GO:0001883//purine nucleoside binding;GO:0036094//small molecule binding;GO:0003824//catalytic activity;GO:0032549//ribonucleoside binding;GO:0097367//carbohydrate derivative binding;GO:1901363//heterocyclic compound binding;GO:0097159//organic cyclic compound binding;GO:0016301//kinase acti…	GO:0008152//metabolic process;GO:0044238//primary metabolic process;GO:0044237//cellular metabolic process;GO:0044260//cellular macromolecule metabolic process;GO:0071704//organic substance metabolic process;GO:0044267//cellular protein metabolic process;GO:0019538//protein metabolic process;GO:0036211//protein modification process;GO:0009987//cellular process;GO:0043170//macromolecule metabolic …
Unigene0001063	10	15.33333333	0.654	0.2653	0.7343	0.3824	1.2319	0.5526	0.5512	0.7223	0.390022282	0.643507474	1	no	-	--	-	-	-	-
Unigene0001064	4	3.333333333	0.1157	0.9008	0.3596	0.3607	0.2179	0.3609	0.4587	0.313166667	-0.550620246	0.691944611	1	no	-	--	-	-	-	-
Unigene0001065	7	10.66666667	0.5569	0.4217	0.3207	0.7719	0.408	0.4344	0.4331	0.5381	0.313174134	0.703073224	1	no	-	--	-	-	-	-
Unigene0001066	9084	10300.33333	113.9091	91.7196	102.2214	89.9131	97.0203	101.0021	102.6167	95.9785	-0.096482365	0.793592047	1	no	SCCPDH	PREDICTED: saccharopine dehydrogenase-like oxidoreductase [Sinocyclocheilus anshuiensis]	-	-	GO:0003824//catalytic activity	GO:0008152//metabolic process;GO:0044699//single-organism process;GO:0044710//single-organism metabolic process
Unigene0001067	6.666666667	7.333333333	0.3953	0.3848	1.2292	0.4623	0.2793	1.0021	0.669766667	0.581233333	-0.204541134	0.870977633	1	no	-	--	-	-	-	-
Unigene0001068	134	203.3333333	4.3565	1.9748	2.9864	5.1397	3.7996	2.679	3.1059	3.872766667	0.318353202	0.541108231	1	no	-	--	-	-	-	-
Unigene0001069	154	222.3333333	4.046	3.1086	2.9695	5.2176	3.914	2.9171	3.3747	4.016233333	0.251083832	0.602837482	1	no	-	--	-	-	-	-
Unigene0001070	21.66666667	20.33333333	1.7784	0.6802	1.7116	1.0894	0.4188	1.5853	1.390066667	1.031166667	-0.430876542	0.544669326	1	no	-	--	-	-	-	-
Unigene0001071	87.33333333	129.6666667	2.0666	2.7267	2.3393	3.3072	3.4833	2.0574	2.377533333	2.9493	0.310907011	0.548258017	1	no	-	--	-	-	-	-
Unigene0001072	0.666666667	0	0	0	0.2366	0	0	0	0.078866667	0.001	-6.301343763	0.558940031	1	no	-	--	-	-	-	-
Unigene0001073	817.3333333	1087	12.3384	11.1966	9.0815	13.2682	13.1622	9.6449	10.87216667	12.0251	0.145409414	0.72803981	1	no	Clip1	PREDICTED: CAP-Gly domain-containing linker protein 1-like isoform X3 [Sinocyclocheilus grahami]	-	-	-	-
Unigene0001074	14.66666667	13.33333333	0.4068	0.5941	0.8012	0.5392	0.2299	0.5395	0.6007	0.4362	-0.461654894	0.537603203	1	no	-	--	-	-	-	-
Unigene0001075	2.333333333	1.333333333	0.0517	0.1511	0.1608	0.0807	0	0.0807	0.1212	0.0538	-1.171711621	0.367429921	1	no	-	--	-	-	-	-
Unigene0001076	13.33333333	13	1.4902	0.5935	0.6319	0.5809	0.5742	1.0039	0.9052	0.719666667	-0.330907747	0.676431871	1	no	-	--	-	-	-	-
Unigene0001077	22	29.66666667	0.2823	0.5725	0.707	0.3301	0.9084	0.5504	0.5206	0.5963	0.195863025	0.795390363	1	no	-	PREDICTED: probable basic-leucine zipper transcription factor H [Oreochromis niloticus]	ko03460//Fanconi anemia pathway//Replication and repair//Genetic Information Processing	-	-	-
Unigene0001078	40.66666667	63	0.4531	2.0072	0.2583	0.5829	0.5762	2.2797	0.9062	1.146266667	0.339041315	0.68558296	1	no	Klhdc8a	PREDICTED: kelch domain-containing protein 8A [Danio rerio]	-	-	-	-
Unigene0001079	94.66666667	262	12.0461	6.8277	4.5324	36.2798	6.9944	8.4952	7.802066667	17.25646667	1.145208866	0.087124541	1	no	VMO1	PREDICTED: vitelline membrane outer layer protein 1 homolog [Sinocyclocheilus grahami]	-	-	-	-
Unigene0001080	304	308.3333333	28.2537	5.4306	7.8029	15.84	13.3705	5.8014	13.82906667	11.67063333	-0.244820937	0.699501377	1	no	VMO1	PREDICTED: vitelline membrane outer layer protein 1-like [Sinocyclocheilus grahami]	-	-	-	-
Unigene0001081	134.6666667	241.6666667	7.6937	1.0238	2.5242	9.0837	4.0666	3.1949	3.747233333	5.4484	0.54000681	0.429893809	1	no	VMO1	PREDICTED: vitelline membrane outer layer protein 1-like [Sinocyclocheilus grahami]	-	-	-	-
Unigene0001082	54.33333333	225.6666667	3.4365	1.8459	4.4831	19.2628	10.8829	3.0041	3.255166667	11.04993333	1.763234348	0.008124487	0.87638341	no	VMO1	PREDICTED: vitelline membrane outer layer protein 1-like [Sinocyclocheilus grahami]	-	-	-	-
Unigene0001083	3.666666667	0.666666667	0.452	0.44	0.0937	0	0.0851	0.0705	0.328566667	0.051866667	-2.663306566	0.0794498	1	no	-	--	-	-	-	-
Unigene0001084	145.6666667	290	1.4637	1.14	1.1691	2.1682	2.2708	1.7932	1.2576	2.0774	0.724105909	0.116860926	1	no	-	PREDICTED: RNA-directed DNA polymerase from mobile element jockey-like [Cyprinus carpio]	-	-	-	-
Unigene0001085	5.666666667	13.66666667	0.6603	0.2857	0.3042	0.6864	1.2439	0.6295	0.416733333	0.853266667	1.033872188	0.208657591	1	no	-	--	-	-	-	-
Unigene0001086	269	359.6666667	3.8343	3.2082	2.8568	4.5843	2.7924	3.4113	3.299766667	3.596	0.124029009	0.785495267	1	no	ASAH1	PREDICTED: acid ceramidase-like isoform X2 [Sinocyclocheilus rhinocerous]	ko01100//Metabolic pathways//Global and Overview//Metabolism;ko04142//Lysosome//Transport and catabolism//Cellular Processes;ko00600//Sphingolipid metabolism//Lipid metabolism//Metabolism	-	GO:0003824//catalytic activity	GO:0044238//primary metabolic process;GO:0008152//metabolic process
Unigene0001087	1672.666667	3016	13.4949	14.6917	8.9786	27.7668	17.3188	10.2657	12.3884	18.45043333	0.574664829	0.208008459	1	no	Slc31a1	PREDICTED: LOW QUALITY PROTEIN: high affinity copper uptake protein 1-like [Cyprinus carpio]	-	GO:0016020//membrane;GO:0044425//membrane part;GO:0031224//intrinsic component of membrane	GO:0015075//ion transmembrane transporter activity;GO:0022857//transmembrane transporter activity;GO:0022891//substrate-specific transmembrane transporter activity;GO:0005215//transporter activity;GO:0046915//transition metal ion transmembrane transporter activity;GO:0022890//inorganic cation transmembrane transporter activity;GO:0046873//metal ion transmembrane transporter activity;GO:0008324//c…	GO:0010035//response to inorganic substance;GO:0048545//response to steroid hormone;GO:0000041//transition metal ion transport;GO:0050896//response to stimulus;GO:0051179//localization;GO:0010033//response to organic substance;GO:0009628//response to abiotic stimulus;GO:0009719//response to endogenous stimulus;GO:0006811//ion transport;GO:0033993//response to lipid;GO:0010038//response to metal i…
Unigene0001088	0	0.333333333	0	0	0	0.0356	0	0	0.001	0.011866667	3.568842835	1	1	no	-	--	-	-	-	-
Unigene0001089	752	1765.666667	9.2276	7.6197	6.0605	18.3455	14.3523	11.7032	7.635933333	14.80033333	0.954753256	0.024321138	1	no	PROS1	PREDICTED: vitamin K-dependent protein S [Sinocyclocheilus rhinocerous]	-	-	GO:0046872//metal ion binding;GO:0043167//ion binding;GO:0005488//binding;GO:0043169//cation binding	-
Unigene0001090	820.3333333	1424.666667	3.7657	4.0627	3.193	6.9748	5.6347	3.283	3.6738	5.2975	0.528038594	0.2286266	1	no	Phip	PREDICTED: PH-interacting protein isoform X1 [Sinocyclocheilus anshuiensis]	-	-	GO:1901363//heterocyclic compound binding;GO:0003676//nucleic acid binding;GO:0005488//binding;GO:0097159//organic cyclic compound binding	-
Unigene0001091	48	46.66666667	1.6748	0.4422	2.0301	0.4869	1.0963	1.705	1.382366667	1.096066667	-0.334804784	0.633613572	1	no	-	--	-	-	-	-
Unigene0001092	2	3	0.4837	0	0.2507	0.3771	0.1139	0.3773	0.2448	0.289433333	0.241627525	1	1	no	-	--	-	-	-	-
Unigene0001093	81.66666667	90.33333333	7.5571	4.263	5.5634	5.5614	4.9228	5.2886	5.7945	5.2576	-0.140279793	0.791916317	1	no	-	--	-	-	-	-
Unigene0001094	40	60.66666667	1.2717	0.9761	0.6844	1.3156	1.0366	1.2971	0.9774	1.216433333	0.315636246	0.561508305	1	no	-	PREDICTED: LOW QUALITY PROTEIN: protein FAM111A-like [Sinocyclocheilus grahami]	-	-	-	-
Unigene0001095	233.3333333	295	11.282	6.9863	7.7063	8.4786	10.0345	8.7425	8.6582	9.0852	0.069451148	0.882469237	1	no	-	PREDICTED: uncharacterized protein LOC100496506 [Xenopus tropicalis]	-	-	-	-
Unigene0001096	39.66666667	38.33333333	0.9417	1.0314	2.7654	0.4283	0.9609	2.2954	1.5795	1.2282	-0.362922429	0.624712461	1	no	-	--	-	-	-	-
Unigene0001097	15.33333333	14.33333333	1.4846	0.925	0.3077	0.8334	0.6153	0.6485	0.905766667	0.699066667	-0.373709402	0.646984836	1	no	-	--	-	-	-	-
Unigene0001098	6	15	0.3914	0.5716	0.2028	0.9663	0.8602	0.6106	0.3886	0.812366667	1.063845143	0.173926776	1	no	-	--	-	-	-	-
Unigene0001099	10784.33333	9551.666667	91.0404	63.6343	149.1868	44.7133	64.9336	108.9851	101.2871667	72.87733333	-0.474909317	0.300998796	1	no	tmem214-b	PREDICTED: transmembrane protein 214 [Sinocyclocheilus rhinocerous]	-	-	-	-
Unigene0001100	8154	10257.33333	30.4927	31.0015	30.8016	29.0219	33.5992	33.4655	30.76526667	32.02886667	0.058070252	0.874310624	1	no	baz1b	PREDICTED: tyrosine-protein kinase BAZ1B-like [Sinocyclocheilus anshuiensis]	-	-	-	-
Unigene0001101	1.333333333	1.666666667	0	0.2618	0	0.2096	0.0633	0	0.087266667	0.090966667	0.059907297	1	1	no	-	--	-	-	-	-
Unigene0001102	18.33333333	35	1.0463	1.146	1.4234	1.9374	1.9711	1.7853	1.205233333	1.897933333	0.655116838	0.277139913	1	no	-	--	-	-	-	-
Unigene0001103	10.33333333	14	1.4663	0.3569	1.0449	0.8574	1.3811	1.0008	0.956033333	1.079766667	0.17558676	0.826462286	1	no	-	--	-	-	-	-
Unigene0001104	26	27	0.8964	1.1504	1.1403	0.6353	0.7676	1.3031	1.062366667	0.902	-0.236082447	0.712152824	1	no	-	--	-	-	-	-
Unigene0001105	642.6666667	670.6666667	1.3467	81.2867	11.7352	55.4907	12.4969	12.4108	31.4562	26.79946667	-0.231140109	0.808146123	1	no	-	PREDICTED: small ubiquitin-related modifier 1-B-like [Clupea harengus]	-	-	-	-
Unigene0001106	150.6666667	191	2.674	2.621	2.96	1.3331	3.204	4.1431	2.751666667	2.8934	0.072460069	0.892685374	1	no	-	--	-	-	-	-
Unigene0001107	44.33333333	63.33333333	1.1284	1.7088	1.3319	1.7594	1.4761	1.6625	1.3897	1.632666667	0.232456797	0.677258717	1	no	-	--	-	-	-	-
Unigene0001108	63.66666667	50	1.6912	1.3669	3.1089	0.8458	0.8115	2.2152	2.055666667	1.290833333	-0.671303607	0.278900542	1	no	-	--	-	-	-	-
Unigene0001109	201.6666667	328.3333333	2.9046	2.9949	2.08	3.5615	4.7879	2.6158	2.659833333	3.655066667	0.458561872	0.33238733	1	no	FHDC1	PREDICTED: FH2 domain-containing protein 1-like [Sinocyclocheilus rhinocerous]	-	-	-	-
Unigene0001110	45	51	1.3331	0.6922	0.9903	0.8315	1.0464	0.9532	1.0052	0.9437	-0.091082368	0.883172621	1	no	-	--	-	-	-	-
Unigene0001111	58.66666667	55	3.914	1.1432	6.6261	4.1195	3.3795	1.4756	3.894433333	2.991533333	-0.380528283	0.584715239	1	no	-	--	-	-	-	-
Unigene0001112	21	10.66666667	1.7058	2.0977	1.8611	0.9099	0.5074	0.9104	1.8882	0.7759	-1.283068953	0.049117557	1	no	-	--	-	-	-	-
Unigene0001113	0	0.333333333	0	0	0	0	0	0.0519	0.001	0.0173	4.112700133	1	1	no	-	--	-	-	-	-
Unigene0001114	63.66666667	97	1.902	2.9348	2.0086	2.6021	3.8536	2.3514	2.2818	2.9357	0.363532202	0.492814098	1	no	-	--	-	-	-	-
Unigene0001115	116.3333333	207.6666667	9.6715	11.3712	4.7808	16.7625	10.7916	10.4454	8.607833333	12.6665	0.557295885	0.286971728	1	no	-	PREDICTED: keratinocyte-associated transmembrane protein 2 [Sinocyclocheilus grahami]	-	-	-	-
Unigene0001116	25	23.66666667	1.099	5.5635	1.4808	2.9131	2.6914	0.9429	2.714433333	2.182466667	-0.314691432	0.690304213	1	no	-	--	-	-	-	-
Unigene0001117	2663.333333	1792.666667	8.9958	5.2493	23.2525	3.6109	5.387	11.2586	12.4992	6.752166667	-0.888413339	0.120150131	1	no	SLC24A4	PREDICTED: sodium/potassium/calcium exchanger 4-like isoform X3 [Sinocyclocheilus anshuiensis]	-	GO:0016020//membrane;GO:0044425//membrane part;GO:0031224//intrinsic component of membrane	-	GO:0009987//cellular process;GO:0044763//single-organism cellular process;GO:0044699//single-organism process
Unigene0001118	0.333333333	0	0	0	0.106	0	0	0	0.035333333	0.001	-5.142957954	1	1	no	-	--	-	-	-	-
Unigene0001119	22.33333333	22	0.42	0.6389	0.7074	0.6344	0.3214	0.4504	0.588766667	0.468733333	-0.328928601	0.617806653	1	no	-	--	-	-	-	-
Unigene0001120	1227.666667	1556.666667	29.5172	39.5258	29.7596	37.6361	37.6099	28.9473	32.9342	34.7311	0.076641598	0.851144026	1	no	lamtor4	PREDICTED: ragulator complex protein LAMTOR4 [Sinocyclocheilus grahami]	-	GO:0012505//endomembrane system;GO:0000323//lytic vacuole;GO:0043226//organelle;GO:0044424//intracellular part;GO:0016020//membrane;GO:0044446//intracellular organelle part;GO:0044440//endosomal part;GO:0098805//whole membrane;GO:0005737//cytoplasm;GO:0044444//cytoplasmic part;GO:0043231//intracellular membrane-bounded organelle;GO:0031090//organelle membrane;GO:0043229//intracellular organelle;G…	GO:0005515//protein binding;GO:0005488//binding	GO:0065007//biological regulation;GO:0008104//protein localization;GO:0044699//single-organism process;GO:0023052//signaling;GO:0033036//macromolecule localization;GO:0051641//cellular localization;GO:0051179//localization;GO:1901700//response to oxygen-containing compound;GO:0009719//response to endogenous stimulus;GO:0031929//TOR signaling;GO:0010243//response to organonitrogen compound;GO:0044…
Unigene0001121	102.6666667	119	3.4229	1.7962	2.2897	1.8359	3.75	1.8178	2.502933333	2.4679	-0.020335927	0.974517435	1	no	-	--	-	-	-	-
Unigene0001122	12	15.66666667	0.3983	0.5041	0.5366	0.59	0.5252	0.4349	0.479666667	0.5167	0.107294698	0.912918518	1	no	-	--	-	-	-	-
Unigene0001123	3002	2968	33.2743	33.4034	36.2827	21.6433	29.9255	32.6808	34.32013333	28.0832	-0.289347822	0.458339317	1	no	GMCL1	PREDICTED: germ cell-less protein-like 1 [Sinocyclocheilus rhinocerous]	-	-	-	-
Unigene0001124	57.66666667	65	1.3577	0.3354	1.8693	0.8847	1.1261	1.2645	1.187466667	1.091766667	-0.121222461	0.852660263	1	no	Tf2-9	PREDICTED: adhesion G protein-coupled receptor E1-like [Danio rerio]	ko03013//RNA transport//Translation//Genetic Information Processing	-	-	-
Unigene0001125	18.33333333	30	0.249	0.8181	0.6452	1.383	0.7622	0.1699	0.570766667	0.7717	0.435139023	0.574245519	1	no	-	--	-	-	-	-
Unigene0001126	10.33333333	18.66666667	0.4885	0.6869	0.5063	1.354	0.4601	0.635	0.560566667	0.816366667	0.542331317	0.452552156	1	no	-	PREDICTED: uncharacterized protein LOC109091437 isoform X3 [Cyprinus carpio]	-	-	-	-
Unigene0001127	18.66666667	33.33333333	1.5182	1.9708	1.2239	2.3674	1.8273	2.6975	1.570966667	2.2974	0.548349497	0.35495742	1	no	-	PREDICTED: myosin-IIIa-like [Sinocyclocheilus rhinocerous]	-	-	-	-
Unigene0001128	1045.333333	1427.666667	14.5376	15.3606	27.8671	23.5212	19.363	21.3701	19.2551	21.4181	0.153589889	0.722922841	1	no	-	PREDICTED: RNA-directed DNA polymerase from mobile element jockey-like, partial [Cynoglossus semilaevis]	-	-	-	-
Unigene0001129	235	237.6666667	9.8111	5.4439	21.1811	6.4997	9.4808	13.9179	12.14536667	9.966133333	-0.285300265	0.615731121	1	no	-	PREDICTED: myosin-IIIa-like [Sinocyclocheilus rhinocerous]	-	-	-	-
Unigene0001130	211	257.3333333	13.0266	9.0386	24.0943	13.5226	14.1682	18.0764	15.3865	15.25573333	-0.012313565	0.983719361	1	no	-	PREDICTED: myosin-IIIa-like [Sinocyclocheilus rhinocerous]	-	-	-	-
Unigene0001131	31	37.66666667	1.4937	1.7898	2.0841	1.4333	2.1105	1.8821	1.7892	1.808633333	0.015585295	1	1	no	-	--	-	-	-	-
Unigene0001132	16	9.333333333	0.899	2.289	0.0717	0.7009	0.4559	0.4315	1.086566667	0.529433333	-1.037255759	0.264688537	1	no	-	--	-	-	-	-
Unigene0001133	85	84.33333333	3.037	1.7847	2.1836	2.0265	1.5721	2.0701	2.3351	1.889566667	-0.305428914	0.562762638	1	no	-	PREDICTED: GRIP and coiled-coil domain-containing protein 2-like [Sinocyclocheilus grahami]	-	-	-	-
Unigene0001134	3.333333333	4.333333333	0	0.5183	0.1379	0.2075	0.3134	0.2076	0.218733333	0.242833333	0.150793378	1	1	no	-	--	-	-	-	-
Unigene0001135	321.3333333	421	8.3574	6.4578	8.3892	7.8599	8.5036	8.6856	7.7348	8.3497	0.110360375	0.801107582	1	no	NKTR	Nktr protein, partial [Danio rerio]	-	-	GO:0016859//cis-trans isomerase activity;GO:0003824//catalytic activity;GO:0016853//isomerase activity	-
Unigene0001136	21.33333333	26	1.6036	0.8058	0.9115	1.3309	0.877	1.0894	1.106966667	1.0991	-0.010289126	1	1	no	-	--	-	-	-	-
Unigene0001137	147.3333333	181.3333333	5.8081	7.6147	3.612	7.064	6.1273	4.2888	5.678266667	5.8267	0.037228429	0.943834806	1	no	-	--	-	-	-	-
Unigene0001138	205.6666667	192.6666667	5.649	13.3904	6.0673	8.202	9.7937	2.1393	8.3689	6.711666667	-0.318366942	0.600898304	1	no	-	--	-	-	-	-
Unigene0001139	7	11.66666667	0.3485	0.1357	1.0114	1.0868	0.5252	0.3806	0.498533333	0.6642	0.413927752	0.711189863	1	no	-	--	-	-	-	-
Unigene0001140	20	9	0.7622	0.6802	2.4357	0.4457	0.4786	0.4954	1.2927	0.473233333	-1.449763902	0.051309146	1	no	-	--	-	-	-	-
Unigene0001141	0	0	0	0	0	0	0	0	0.001	0.001	0	notest	notest	notest	-	--	-	-	-	-
Unigene0001142	412.3333333	357	12.3225	3.3939	14.654	7.0402	7.6847	6.817	10.12346667	7.180633333	-0.495520408	0.354886182	1	no	-	hypothetical protein cypCar_00037063 [Cyprinus carpio]	-	-	-	-
Unigene0001143	44	36.33333333	1.3641	0.9522	1.0938	0.7224	0.8485	0.7629	1.1367	0.777933333	-0.547133115	0.318472205	1	no	-	--	-	-	-	-
Unigene0001144	19.33333333	18	3.3687	1.6963	1.6856	2.083	1.9695	1.1779	2.2502	1.743466667	-0.368094454	0.575387972	1	no	-	--	-	-	-	-
Unigene0001145	1	0	0.243	0	0.1259	0	0	0	0.122966667	0.001	-6.942123478	0.319710094	1	no	-	--	-	-	-	-
Unigene0001146	135.3333333	175.6666667	9.9767	6.9178	12.4981	8.1139	11.4931	11.869	9.797533333	10.492	0.098799231	0.849418003	1	no	-	--	-	-	-	-
Unigene0001147	6.666666667	8.666666667	1.0774	0.2622	0.4653	0.7	0.592	0.6303	0.601633333	0.640766667	0.090914598	1	1	no	-	--	-	-	-	-
Unigene0001148	828.3333333	416.3333333	3.4678	0.9324	5.6912	0.7218	1.0562	2.2909	3.3638	1.3563	-1.310415607	0.035753247	1	no	Pol	pol-like protein [Danio rerio]	-	-	-	-
Unigene0001149	37.66666667	15.66666667	2.0228	0.458	2.9255	0.5868	0.4431	0.7706	1.8021	0.600166667	-1.586243971	0.02999631	1	no	-	--	-	-	-	-
Unigene0001150	204.6666667	218.6666667	7.2614	5.2935	9.1625	5.9621	5.9476	7.0595	7.239133333	6.323066667	-0.195192558	0.68011786	1	no	-	--	-	-	-	-
Unigene0001151	52.33333333	45.66666667	2.8905	3.1413	4.5984	2.6728	1.7729	3.0411	3.5434	2.4956	-0.50574762	0.367498977	1	no	-	--	-	-	-	-
Unigene0001152	8.333333333	7.666666667	0.2315	0.4057	0.5279	0.2166	0.0872	0.5417	0.388366667	0.281833333	-0.462577126	0.613150043	1	no	-	--	-	-	-	-
Unigene0001153	92	72.66666667	5.1427	8.1985	4.3309	4.4605	3.2092	3.8108	5.8907	3.826833333	-0.622288012	0.243400557	1	no	-	--	-	-	-	-
Unigene0001154	363.6666667	661.3333333	2.4359	2.6734	1.9354	4.9166	3.5299	2.1571	2.348233333	3.534533333	0.589943978	0.20298019	1	no	HIP1R	PREDICTED: huntingtin-interacting protein 1-related protein [Sinocyclocheilus rhinocerous]	-	-	GO:0005488//binding;GO:0008289//lipid binding	-
Unigene0001155	587.3333333	795	11.2218	11.88	11.5498	13.9799	11.1245	13.2981	11.55053333	12.80083333	0.148278265	0.720306286	1	no	STX8	PREDICTED: syntaxin-8-like isoform X1 [Sinocyclocheilus rhinocerous]	ko04130//SNARE interactions in vesicular transport//Folding, sorting and degradation//Genetic Information Processing	-	-	-
Unigene0001156	55	62.33333333	2.162	3.4204	1.8207	4.0384	1.5274	1.2648	2.4677	2.276866667	-0.116117206	0.858440803	1	no	-	--	-	-	-	-
Unigene0001157	2.666666667	6	0.5093	0.124	0.3959	0.2978	0.8396	0.7946	0.343066667	0.644	0.908571732	0.392560905	1	no	-	--	-	-	-	-
Unigene0001158	12.33333333	22	0.9459	0.6651	0.3268	0.8604	1.5839	0.5329	0.645933333	0.9924	0.619536463	0.416329391	1	no	-	--	-	-	-	-
Unigene0001159	34.66666667	122.6666667	1.9999	0.5262	0.2801	5.3728	1.6801	0.9908	0.9354	2.681233333	1.519241441	0.055481846	1	no	-	--	-	-	-	-
Unigene0001160	52.66666667	29.66666667	3.0809	2.1049	3.4174	0.59	1.731	1.7286	2.867733333	1.349866667	-1.087093964	0.075442523	1	no	-	--	-	-	-	-
Unigene0001161	65.33333333	115	1.8419	2.5268	1.0703	3.1549	2.7076	2.1116	1.813	2.658033333	0.551980272	0.311097524	1	no	-	--	-	-	-	-
Unigene0001162	1809	1549	37.3046	21.7785	55.6384	25.7456	23.3926	30.5808	38.2405	26.573	-0.525140275	0.23889126	1	no	-	--	-	-	-	-
Unigene0001163	97.66666667	90	3.3023	1.8835	4.702	1.8984	3.9902	1.8213	3.295933333	2.569966667	-0.358937414	0.529177148	1	no	-	PREDICTED: large proline-rich protein BAG6-like [Cyprinus carpio]	-	-	-	-
Unigene0001164	127.6666667	146.6666667	2.9973	2.8384	4.6882	2.5492	4.5685	3.018	3.507966667	3.378566667	-0.054223716	0.917672951	1	no	-	PREDICTED: adhesion G protein-coupled receptor E1-like [Danio rerio]	-	-	-	-
Unigene0001165	178.6666667	207.3333333	2.3552	1.688	3.7889	1.6559	2.722	3.0994	2.6107	2.492433333	-0.066881768	0.899173358	1	no	Tf2-8	Retrotransposable element Tf2 protein type 1 [Larimichthys crocea]	ko03013//RNA transport//Translation//Genetic Information Processing	-	-	-
Unigene0001166	818.3333333	1118.333333	13.0828	14.3955	9.8231	12.726	15.2031	14.4884	12.4338	14.13916667	0.185429815	0.655062404	1	no	GTF3C5	PREDICTED: general transcription factor 3C polypeptide 5 [Sinocyclocheilus rhinocerous]	-	-	-	-
Unigene0001167	1.333333333	12.66666667	0.2858	0	0.0987	0.817	1.9742	0.3716	0.128166667	1.054266667	3.040146826	0.010590212	0.934123232	no	-	--	-	-	-	-
Unigene0001168	744	714	32.0074	29.771	22.0388	21.2637	25.7254	20.1899	27.93906667	22.393	-0.319236007	0.449579519	1	no	HSBP1	PREDICTED: heat shock factor-binding protein 1-like [Sinocyclocheilus grahami]	-	-	-	-
Unigene0001169	21	29.66666667	0.7114	0.5352	0.8044	0.6303	1.127	0.6811	0.683666667	0.8128	0.249607316	0.724126506	1	no	-	PREDICTED: docking protein 1-like [Cyprinus carpio]	-	-	-	-
Unigene0001170	16.33333333	31	1.0627	0.5571	0.3813	1.179	0.924	1.0202	0.667033333	1.041066667	0.642231694	0.325073341	1	no	-	--	-	-	-	-
Unigene0001171	7.333333333	17.33333333	0.3044	0.0988	0.7362	0.4747	1.0992	0.6728	0.3798	0.7489	0.979533184	0.256395853	1	no	-	--	-	-	-	-
Unigene0001172	5	11.66666667	0.2663	0.1152	0.0613	0.5306	0.0557	0.2308	0.1476	0.272366667	0.88385743	0.370488435	1	no	Ephb2	PREDICTED: ephrin type-B receptor 2 isoform X1 [Danio rerio]	-	-	-	-
Unigene0001173	9.666666667	13.66666667	0.7703	0.1154	0.8598	0.6005	0.279	1.063	0.581833333	0.6475	0.154274242	0.877794633	1	no	-	--	-	-	-	-
Unigene0001174	46.33333333	46	1.6738	3.5945	1.5307	2.9553	0.9738	1.536	2.266333333	1.8217	-0.315074675	0.63363948	1	no	-	--	-	-	-	-
Unigene0001175	53.66666667	57.33333333	2.3407	0.7804	2.0937	1.2749	1.8725	1.4756	1.738266667	1.541	-0.17378256	0.777800102	1	no	-	--	-	-	-	-
Unigene0001176	2	5.666666667	0.0454	0	0.235	0.3889	0.2136	0.0354	0.093466667	0.212633333	1.185843929	0.44234698	1	no	-	--	-	-	-	-
Unigene0001177	108	591	1.1468	1.5418	6.3392	13.6025	27.4416	1.4269	3.009266667	14.157	2.234031715	0.008846361	0.896248427	no	pxn1	PREDICTED: fucolectin-4-like [Sinocyclocheilus grahami]	-	-	-	-
Unigene0001178	33	200	0.1847	0.3237	3.2543	6.4797	12.3865	0.5474	1.254233333	6.4712	2.367227499	0.023247713	1	no	-	--	-	-	-	-
Unigene0001179	171	183.3333333	1.6252	1.4455	2.1108	1.0559	1.6064	1.9172	1.727166667	1.5265	-0.178179716	0.716597599	1	no	TBX18	PREDICTED: T-box transcription factor TBX18-like isoform X2 [Sinocyclocheilus rhinocerous]	-	GO:0043231//intracellular membrane-bounded organelle;GO:0043226//organelle;GO:0044424//intracellular part;GO:0005622//intracellular;GO:0043227//membrane-bounded organelle;GO:0044464//cell part;GO:0043229//intracellular organelle;GO:0005623//cell	GO:0003676//nucleic acid binding;GO:1901363//heterocyclic compound binding;GO:0005488//binding;GO:0097159//organic cyclic compound binding	GO:0043170//macromolecule metabolic process;GO:0006807//nitrogen compound metabolic process;GO:0006139//nucleobase-containing compound metabolic process;GO:0034645//cellular macromolecule biosynthetic process;GO:0090304//nucleic acid metabolic process;GO:1901360//organic cyclic compound metabolic process;GO:0016070//RNA metabolic process;GO:0044260//cellular macromolecule metabolic process;GO:003…
Unigene0001180	2.666666667	9	0.036	0.0702	0.1867	0.1124	0.5091	0.2249	0.097633333	0.282133333	1.530931434	0.139126074	1	no	-	PREDICTED: Hermansky-Pudlak syndrome 5 protein [Callorhinchus milii]	-	-	-	-
Unigene0001181	6.333333333	8.666666667	0.5179	0	0.9202	0.8652	0.3484	0.3462	0.479366667	0.519933333	0.117197058	0.94716025	1	no	-	--	-	-	-	-
Unigene0001182	5.666666667	8	0.682	0.5533	0.7069	0.8862	0.6424	0.7093	0.6474	0.745966667	0.2044538	0.849689112	1	no	-	PREDICTED: neuron navigator 3-like [Poecilia mexicana]	ko03013//RNA transport//Translation//Genetic Information Processing	-	-	-
Unigene0001183	608.6666667	442	10.0895	6.3211	12.2812	4.1273	5.4851	7.4328	9.563933333	5.681733333	-0.751272952	0.104529779	1	no	fuz	PREDICTED: protein fuzzy homolog [Sinocyclocheilus rhinocerous]	-	-	-	-
Unigene0001184	1621.333333	2171	10.7111	9.2058	9.5194	9.588	11.2088	11.7815	9.8121	10.85943333	0.14631498	0.708478194	1	no	Sp4	PREDICTED: LOW QUALITY PROTEIN: transcription factor Sp4-like [Cyprinus carpio]	-	-	GO:0097159//organic cyclic compound binding;GO:0005488//binding	-
Unigene0001185	0	0	0	0	0	0	0	0	0.001	0.001	0	notest	notest	notest	-	novel protein similar to DNA polymerases [Danio rerio]	-	-	-	-
Unigene0001186	645.3333333	843.6666667	24.8275	26.5913	15.2467	25.5752	23.6133	23.029	22.22183333	24.0725	0.115408132	0.789390634	1	no	-	--	-	-	-	-
Unigene0001187	21	33.33333333	0.7349	0.5504	0.498	0.7052	0.9052	0.7496	0.594433333	0.786666667	0.404237435	0.505268358	1	no	-	--	-	-	-	-
Unigene0001188	20.33333333	28.66666667	1.8076	2.2188	0.7331	2.2671	2.739	0.7356	1.5865	1.9139	0.270667931	0.707954692	1	no	-	--	-	-	-	-
Unigene0001189	0.666666667	2.333333333	0.1273	0.124	0	0	0.7196	0.0993	0.083766667	0.272966667	1.704276617	0.381057864	1	no	-	--	-	-	-	-
Unigene0001190	4.333333333	1.666666667	0.7289	0.5914	0.2518	0.1894	0.1144	0.1895	0.524033333	0.164433333	-1.672155797	0.122650059	1	no	-	--	-	-	-	-
Unigene0001191	159	143	4.2837	1.4819	4.733	2.6616	1.6795	3.2226	3.499533333	2.521233333	-0.473032908	0.398036428	1	no	-	PREDICTED: myosin-IIIa-like [Sinocyclocheilus rhinocerous]	-	-	-	-
Unigene0001192	33.66666667	34	1.3461	0.557	1.5348	0.551	1.2362	1.1025	1.145966667	0.963233333	-0.250607857	0.700588354	1	no	-	--	-	-	-	-
Unigene0001193	3.666666667	3	0.126	0.1226	0.0979	0.1228	0	0.0983	0.1155	0.0737	-0.648156327	0.667749962	1	no	-	--	-	-	-	-
Unigene0001194	473.3333333	500	6.5171	4.2801	2.9408	5.3075	4.1046	2.6211	4.579333333	4.011066667	-0.191151639	0.691914965	1	no	Irf2	PREDICTED: interferon regulatory factor 2-like [Sinocyclocheilus anshuiensis]	-	-	-	-
Unigene0001195	33.66666667	33	0.961	0.8607	2.1116	1.1388	0.4707	1.4392	1.3111	1.016233333	-0.367546035	0.586184948	1	no	-	--	-	-	-	-
Unigene0001196	1928	1589.333333	36.5755	14.6079	67.2814	22.5486	27.8115	29.315	39.48826667	26.55836667	-0.572257618	0.262289865	1	no	QRICH2	PREDICTED: neurofilament heavy polypeptide-like [Sinocyclocheilus anshuiensis]	-	-	-	-
Unigene0001197	0	0	0	0	0	0	0	0	0.001	0.001	0	notest	notest	notest	-	--	-	-	-	-
Unigene0001198	60.33333333	84.66666667	0.8522	1.2286	0.8833	1.0094	1.0806	1.3423	0.988033333	1.1441	0.211581536	0.683394778	1	no	-	--	-	-	-	-
Unigene0001199	216	465.6666667	0.6772	0.995	0.3444	1.6058	1.1782	0.8339	0.6722	1.205966667	0.843227583	0.10137831	1	no	LRRK2	PREDICTED: leucine-rich repeat serine/threonine-protein kinase 2-like [Sinocyclocheilus rhinocerous]	-	GO:0044464//cell part;GO:0005623//cell	GO:0097159//organic cyclic compound binding;GO:0097367//carbohydrate derivative binding;GO:0016301//kinase activity;GO:0032550//purine ribonucleoside binding;GO:0032549//ribonucleoside binding;GO:0016740//transferase activity;GO:0001882//nucleoside binding;GO:0003824//catalytic activity;GO:0036094//small molecule binding;GO:0004672//protein kinase activity;GO:0001883//purine nucleoside binding;GO…	GO:0009987//cellular process;GO:0007154//cell communication;GO:0043170//macromolecule metabolic process;GO:0043412//macromolecule modification;GO:0044260//cellular macromolecule metabolic process;GO:0044237//cellular metabolic process;GO:0007165//signal transduction;GO:0035556//intracellular signal transduction;GO:0044238//primary metabolic process;GO:0071704//organic substance metabolic process;…
Unigene0001200	22385	20297.33333	251.771	242.6969	265.4545	144.6369	227.2193	202.6561	253.3074667	191.5041	-0.403514324	0.286136278	1	no	Cct7	PREDICTED: T-complex protein 1 subunit eta-like [Sinocyclocheilus anshuiensis]	-	GO:0005622//intracellular;GO:0005623//cell;GO:0044424//intracellular part;GO:0044464//cell part	GO:0097367//carbohydrate derivative binding;GO:0097159//organic cyclic compound binding;GO:0001883//purine nucleoside binding;GO:0005488//binding;GO:0001882//nucleoside binding;GO:1901363//heterocyclic compound binding;GO:0005515//protein binding;GO:0036094//small molecule binding;GO:0032550//purine ribonucleoside binding;GO:0032549//ribonucleoside binding	GO:0043170//macromolecule metabolic process;GO:0044267//cellular protein metabolic process;GO:0044260//cellular macromolecule metabolic process;GO:0009987//cellular process;GO:0071704//organic substance metabolic process;GO:0044237//cellular metabolic process;GO:0008152//metabolic process;GO:0019538//protein metabolic process;GO:0044238//primary metabolic process
Unigene0001201	25.66666667	24.33333333	2.5572	1.5115	3.0291	1.2104	1.9785	2.3508	2.365933333	1.846566667	-0.357564073	0.570306376	1	no	-	--	-	-	-	-
Unigene0001202	2339	3198	8.8008	7.9047	8.5457	8.6509	9.5937	10.2384	8.417066667	9.494333333	0.173749158	0.64825991	1	no	ago3	PREDICTED: protein argonaute-3 isoform X2 [Esox lucius]	-	GO:0032991//macromolecular complex;GO:0005622//intracellular;GO:0031332//RNAi effector complex;GO:0044424//intracellular part;GO:0005623//cell;GO:0044464//cell part;GO:0030529//intracellular ribonucleoprotein complex;GO:1990904//ribonucleoprotein complex	GO:0003723//RNA binding;GO:1901363//heterocyclic compound binding;GO:0097159//organic cyclic compound binding;GO:0005488//binding;GO:0003676//nucleic acid binding	GO:0060255//regulation of macromolecule metabolic process;GO:1901576//organic substance biosynthetic process;GO:0019538//protein metabolic process;GO:0044763//single-organism cellular process;GO:0071704//organic substance metabolic process;GO:0051172//negative regulation of nitrogen compound metabolic process;GO:0010467//gene expression;GO:0065007//biological regulation;GO:0032269//negative regul…
Unigene0001203	378	568.3333333	4.5672	4.7482	4.2271	5.9036	5.9756	5.0042	4.514166667	5.6278	0.318111374	0.452654998	1	no	ago3	PREDICTED: protein argonaute-3-like isoform X1 [Clupea harengus]	-	GO:0032991//macromolecular complex;GO:1990904//ribonucleoprotein complex;GO:0030529//intracellular ribonucleoprotein complex;GO:0044424//intracellular part;GO:0005623//cell;GO:0044464//cell part;GO:0005622//intracellular;GO:0031332//RNAi effector complex	GO:0005488//binding;GO:0003723//RNA binding;GO:0097159//organic cyclic compound binding;GO:0003676//nucleic acid binding;GO:1901363//heterocyclic compound binding	GO:0044237//cellular metabolic process;GO:0043170//macromolecule metabolic process;GO:0043603//cellular amide metabolic process;GO:0065007//biological regulation;GO:0010556//regulation of macromolecule biosynthetic process;GO:0044249//cellular biosynthetic process;GO:0051246//regulation of protein metabolic process;GO:0051248//negative regulation of protein metabolic process;GO:0009892//negative …
Unigene0001204	0.666666667	1.333333333	0	0.1131	0.1204	0.2717	0	0.0906	0.077833333	0.120766667	0.633762256	1	1	no	Prkag2	PREDICTED: 5'-AMP-activated protein kinase subunit gamma-2 isoform X2 [Lepisosteus oculatus]	ko04068//FoxO signaling pathway//Signal transduction//Environmental Information Processing;ko04910//Insulin signaling pathway//Endocrine system//Organismal Systems;ko04920//Adipocytokine signaling pathway//Endocrine system//Organismal Systems	-	-	-
Unigene0001205	2	2	0.0828	0.0806	0.0858	0.1613	0.039	0	0.083066667	0.066766667	-0.315141647	0.843094863	1	no	-	--	-	-	-	-
Unigene0001206	2.666666667	7.333333333	0.1185	0.1154	0.2456	0.7853	0.0558	0.1849	0.159833333	0.342	1.097428011	0.369477075	1	no	-	--	-	-	-	-
Unigene0001207	21	108	0.6048	0.0906	0.2893	3.1795	0.2045	0.5685	0.328233333	1.3175	2.005009299	0.028049617	1	no	myadm	PREDICTED: myeloid-associated differentiation marker-like [Sinocyclocheilus anshuiensis]	-	-	-	-
Unigene0001208	163.6666667	138	1.8714	2.0444	3.1538	1.3365	1.5743	1.9723	2.356533333	1.6277	-0.533831266	0.278977385	1	no	TPH1	PREDICTED: tryptophan 5-hydroxylase 1 isoform X1 [Sinocyclocheilus rhinocerous]	ko01100//Metabolic pathways//Global and Overview//Metabolism;ko00380//Tryptophan metabolism//Amino acid metabolism//Metabolism	-	GO:0016714//oxidoreductase activity, acting on paired donors, with incorporation or reduction of molecular oxygen, reduced pteridine as one donor, and incorporation of one atom of oxygen;GO:0004497//monooxygenase activity;GO:0046872//metal ion binding;GO:0046914//transition metal ion binding;GO:0005488//binding;GO:0043168//anion binding;GO:0036094//small molecule binding;GO:0031406//carboxylic ac…	GO:0042428//serotonin metabolic process;GO:0008152//metabolic process;GO:0006725//cellular aromatic compound metabolic process;GO:0044699//single-organism process;GO:0006807//nitrogen compound metabolic process;GO:1901564//organonitrogen compound metabolic process;GO:0006520//cellular amino acid metabolic process;GO:0044237//cellular metabolic process;GO:0044238//primary metabolic process;GO:0046…
Unigene0001209	16.33333333	11.33333333	1.6413	1.38	0.6186	0.1163	1.0541	0.9893	1.2133	0.7199	-0.753067891	0.384786147	1	no	PLAU	PREDICTED: urokinase-type plasminogen activator-like [Sinocyclocheilus anshuiensis]	-	-	GO:0004175//endopeptidase activity;GO:0016787//hydrolase activity;GO:0008233//peptidase activity;GO:0016740//transferase activity;GO:0070011//peptidase activity, acting on L-amino acid peptides;GO:0003824//catalytic activity;GO:0016772//transferase activity, transferring phosphorus-containing groups	GO:0016485//protein processing;GO:0006793//phosphorus metabolic process;GO:0006508//proteolysis;GO:0019538//protein metabolic process;GO:0006796//phosphate-containing compound metabolic process;GO:0009987//cellular process;GO:0044237//cellular metabolic process;GO:0031638//zymogen activation;GO:0010467//gene expression;GO:0071704//organic substance metabolic process;GO:0043170//macromolecule meta…
Unigene0001210	25.33333333	66	0.9387	3.3291	0.7645	6.6912	2.021	1.9874	1.677433333	3.566533333	1.088267027	0.138419397	1	no	-	PREDICTED: uncharacterized protein LOC107552172 isoform X1 [Sinocyclocheilus grahami]	-	-	-	-
Unigene0001211	13.66666667	17	0.7158	0.1161	0.8244	0.279	0.487	0.8996	0.5521	0.5552	0.008077967	1	1	no	Tf2-6	PREDICTED: uncharacterized mitochondrial protein AtMg00860-like [Sinocyclocheilus anshuiensis]	-	-	-	-
Unigene0001212	319	414.6666667	2.6258	2.4647	2.4291	2.2855	3.0713	2.7757	2.506533333	2.710833333	0.113042997	0.796842739	1	no	RUNX1T1	PREDICTED: protein CBFA2T1 isoform X1 [Sinocyclocheilus anshuiensis]	-	-	-	-
Unigene0001213	219.3333333	118.3333333	10.4297	3.7538	28.3028	3.5482	6.2516	8.7763	14.1621	6.192033333	-1.193550066	0.075856904	1	no	-	--	-	-	-	-
Unigene0001214	44.66666667	46.33333333	1.6533	1.7042	0.9744	1.2131	1.9237	0.708	1.443966667	1.2816	-0.172091386	0.788582996	1	no	-	--	-	-	-	-
Unigene0001215	0.333333333	1.666666667	0	0.0605	0	0.0969	0	0.1455	0.020166667	0.0808	2.002382651	0.478820497	1	no	-	PREDICTED: uncharacterized protein LOC107656688 [Sinocyclocheilus anshuiensis]	-	-	-	-
Unigene0001216	1079.666667	1679.333333	4.2038	4.4252	4.4238	5.7308	5.9055	5.1694	4.350933333	5.6019	0.364591318	0.357003306	1	no	GLTSCR1	PREDICTED: glioma tumor suppressor candidate region gene 1 protein-like isoform X3 [Sinocyclocheilus rhinocerous]	-	-	-	-
Unigene0001217	54798	55255.33333	298.2107	188.7044	528.6288	164.723	271.9008	398.1834	338.5146333	278.2690667	-0.282737657	0.548584527	1	no	pim2	PREDICTED: serine/threonine-protein kinase pim-2-like [Cyprinus carpio]	-	-	-	-
Unigene0001218	146.6666667	178.3333333	4.3404	5.8928	2.6931	5.0413	4.5333	3.5237	4.308766667	4.3661	0.0190702	0.976176942	1	no	-	--	-	-	-	-
Unigene0001219	49.66666667	127.6666667	1.0058	1.6913	1.8638	3.8018	1.6937	3.8988	1.5203	3.131433333	1.042467127	0.064061006	1	no	-	--	-	-	-	-
Unigene0001220	11.33333333	23.66666667	0.5306	0.5166	0.4583	1.0342	0.833	0.7243	0.501833333	0.863833333	0.783544686	0.219037252	1	no	-	--	-	-	-	-
Unigene0001221	87.66666667	133.6666667	1.2635	3.6669	1.2848	4.8694	1.976	0.9483	2.071733333	2.5979	0.326507583	0.631775738	1	no	-	--	-	-	-	-
Unigene0001222	91	83	6.7084	5.2587	12.1002	4.6188	5.252	7.9509	8.022433333	5.940566667	-0.43343934	0.436696941	1	no	-	--	-	-	-	-
Unigene0001223	331	889.6666667	22.2209	0.2306	1.1049	37.6588	4.8421	7.6315	7.852133333	16.7108	1.089624226	0.323218318	1	no	dhdh	PREDICTED: trans-1,2-dihydrobenzene-1,2-diol dehydrogenase-like [Sinocyclocheilus grahami]	ko00980//Metabolism of xenobiotics by cytochrome P450//Xenobiotics biodegradation and metabolism//Metabolism;ko00040//Pentose and glucuronate interconversions//Carbohydrate metabolism//Metabolism	-	-	GO:0044699//single-organism process;GO:0008152//metabolic process;GO:0044710//single-organism metabolic process
Unigene0001224	56.33333333	51	1.3186	3.6311	1.3667	1.7917	1.5969	1.3812	2.105466667	1.589933333	-0.405173761	0.500604577	1	no	-	--	-	-	-	-
Unigene0001225	181.3333333	201.3333333	11.7362	14.4809	7.806	10.2754	12.2961	9.1055	11.34103333	10.559	-0.103078887	0.83372903	1	no	-	--	-	-	-	-
Unigene0001226	995.3333333	1099.333333	53.9805	66.8947	37.4284	45.3606	53.7009	46.9592	52.76786667	48.67356667	-0.116521163	0.783408112	1	no	-	--	-	-	-	-
Unigene0001227	25	34	0.68	1.1498	0.8532	1.0882	1.0114	0.9213	0.894333333	1.006966667	0.171131373	0.792342932	1	no	-	--	-	-	-	-
Unigene0001228	32.66666667	48.33333333	2.5916	1.9077	1.7034	3.3511	3.0365	1.2819	2.067566667	2.5565	0.306236178	0.623126776	1	no	-	PREDICTED: golgin subfamily A member 6-like protein 22 [Kryptolebias marmoratus]	-	-	-	-
Unigene0001229	345.3333333	461.6666667	1.8782	1.7991	1.5303	1.8871	2.1286	1.7744	1.735866667	1.930033333	0.152969627	0.72342631	1	no	NHS	PREDICTED: Nance-Horan syndrome protein-like isoform X2 [Sinocyclocheilus rhinocerous]	-	-	-	-
Unigene0001230	111.6666667	183.3333333	2.6205	2.3778	3.5863	3.9472	2.9476	4.5247	2.861533333	3.8065	0.411676666	0.402959427	1	no	pol	PREDICTED: uncharacterized protein LOC108184914 [Danio rerio]	-	-	-	-
Unigene0001231	547.6666667	639.6666667	38.1233	38.0336	27.1251	34.774	32.1169	32.7792	34.42733333	33.22336667	-0.051356162	0.904196384	1	no	glrx3	PREDICTED: glutaredoxin 3-like isoform X3 [Sinocyclocheilus grahami]	-	GO:0005622//intracellular;GO:0044444//cytoplasmic part;GO:0005737//cytoplasm;GO:0044464//cell part;GO:0044424//intracellular part;GO:0005623//cell	GO:0016667//oxidoreductase activity, acting on a sulfur group of donors;GO:0016491//oxidoreductase activity;GO:0015036//disulfide oxidoreductase activity;GO:0003824//catalytic activity	GO:0055065//metal ion homeostasis;GO:0098771//inorganic ion homeostasis;GO:0055080//cation homeostasis;GO:0043170//macromolecule metabolic process;GO:0065007//biological regulation;GO:0044763//single-organism cellular process;GO:0044710//single-organism metabolic process;GO:0055076//transition metal ion homeostasis;GO:0019725//cellular homeostasis;GO:0044238//primary metabolic process;GO:0009987/…
Unigene0001232	65	101.6666667	0.9936	0.7708	1.2873	1.2104	0.5264	2.0465	1.017233333	1.2611	0.310032037	0.602911627	1	no	-	--	-	-	-	-
Unigene0001233	28.66666667	10	1.4167	0.4214	1.5908	0.2455	0.1853	0.5218	1.142966667	0.317533333	-1.847803376	0.013145357	0.984885363	no	-	--	-	-	-	-
Unigene0001234	20.33333333	20	0.4054	1.0195	0.6303	0.5531	0.3182	0.7642	0.685066667	0.545166667	-0.329547036	0.632411956	1	no	-	PREDICTED: LOW QUALITY PROTEIN: protein NLRC5-like [Sinocyclocheilus anshuiensis]	-	-	-	-
Unigene0001235	8	27.66666667	0.3144	0.9181	0.6517	3.7376	0.8883	0.613	0.628066667	1.7463	1.475311815	0.077485441	1	no	-	--	-	-	-	-
Unigene0001236	3186.333333	4763.666667	14.0703	12.1949	13.3383	15.9041	19.1331	14.2663	13.20116667	16.4345	0.31606213	0.405941934	1	no	Atp11c	PREDICTED: phospholipid-transporting ATPase IG isoform X1 [Sinocyclocheilus rhinocerous]	-	-	-	-
Unigene0001237	5533.333333	4995.333333	24.9171	9.9585	31.5242	16.1069	18.6637	14.596	22.13326667	16.45553333	-0.42764361	0.345155042	1	no	pol	Septin-8-A [Larimichthys crocea]	-	-	-	-
Unigene0001238	1.333333333	1.666666667	0.2522	0.2456	0	0	0.3564	0.1967	0.165933333	0.184366667	0.151974112	1	1	no	-	--	-	-	-	-
Unigene0001239	69.66666667	81.66666667	1.1017	1.7292	1.8876	1.7353	1.5459	1.2802	1.572833333	1.520466667	-0.048851614	0.931296372	1	no	-	PREDICTED: RNA-directed DNA polymerase from mobile element jockey-like [Oryzias latipes]	-	-	-	-
Unigene0001240	0	3.666666667	0	0	0	0.3011	0	0.1722	0.001	0.157766667	7.301648611	0.030694581	1	no	-	PREDICTED: uncharacterized protein C2orf61 homolog [Sinocyclocheilus rhinocerous]	-	-	-	-
Unigene0001241	13	12.66666667	1.1824	0.3223	0.3431	0.7006	0	0.7009	0.615933333	0.467166667	-0.398836868	0.721381635	1	no	pol	PREDICTED: protein MAATS1 isoform X1 [Danio rerio]	-	-	-	-
Unigene0001242	15.33333333	7.666666667	1.1035	0.2387	1.5251	0.1434	0.3465	0.6695	0.955766667	0.386466667	-1.306314468	0.146986843	1	no	-	--	-	-	-	-
Unigene0001243	167	178.6666667	3.9662	5.5379	3.543	4.1094	4.3995	3.1548	4.349033333	3.8879	-0.161703654	0.739593835	1	no	si:ch211-67n3.3	BLOC-1-related complex subunit 7 [Danio rerio]	-	-	-	-
Unigene0001244	6.333333333	3	0.1273	0.4339	0.6599	0.2482	0.2399	0	0.407033333	0.1627	-1.322932695	0.225042388	1	no	Tmem150c	PREDICTED: transmembrane protein 150C-like [Sinocyclocheilus rhinocerous]	-	-	-	-
Unigene0001245	190.6666667	232	10.1318	11.479	12.4052	14.551	9.7667	9.5206	11.33866667	11.27943333	-0.007556411	0.992125254	1	no	-	--	-	-	-	-
Unigene0001246	3	5	0.5821	0.1889	0.1006	0.3025	0.0914	0.7567	0.290533333	0.383533333	0.400648274	0.815227561	1	no	-	--	-	-	-	-
Unigene0001247	17.33333333	46	0.9922	0.8174	2.2151	3.3918	3.1633	2.2028	1.341566667	2.9193	1.121703728	0.074854316	1	no	-	--	-	-	-	-
Unigene0001248	18	27.66666667	0.534	0.7624	0.6272	0.6383	0.9053	0.9163	0.6412	0.819966667	0.354790837	0.560326786	1	no	-	--	-	-	-	-
Unigene0001249	12.66666667	122.6666667	1.502	0	0.4151	13.5055	0.0943	0.781	0.639033333	4.7936	2.907146437	0.035268163	1	no	-	--	-	-	-	-
Unigene0001250	576.3333333	1060.333333	2.0362	2.1288	1.8929	4.6289	2.0729	2.3333	2.0193	3.0117	0.576722806	0.205969215	1	no	AKAP13	PREDICTED: A-kinase anchor protein 13-like isoform X6 [Sinocyclocheilus anshuiensis]	-	-	-	-
Unigene0001251	168.3333333	160.3333333	7.9044	6.8459	11.3848	5.4423	5.6082	9.1683	8.7117	6.7396	-0.370291305	0.459995718	1	no	-	--	-	-	-	-
Unigene0001252	9	11	0.4875	0.4218	0.5614	0.7178	0.7652	0.0422	0.490233333	0.5084	0.052495447	1	1	no	-	--	-	-	-	-
Unigene0001253	78	65.33333333	2.0028	2.5901	2.4167	1.7712	2.0273	1.1192	2.336533333	1.639233333	-0.511348393	0.331937195	1	no	-	Retrotransposable element Tf2 protein type 3 [Larimichthys crocea]	-	-	-	-
Unigene0001254	16.33333333	18.33333333	0.6028	0.8608	0.4999	0.5013	0.53	0.7837	0.6545	0.605	-0.11345805	0.858255643	1	no	-	--	-	-	-	-
Unigene0001255	39	62.33333333	2.398	2.594	1.2151	3.9054	2.0078	2.203	2.069033333	2.7054	0.386885028	0.516399321	1	no	-	--	-	-	-	-
Unigene0001256	11	24.66666667	1.1422	0.7645	0.444	1.781	1.2104	1.3364	0.783566667	1.4426	0.880543398	0.183383351	1	no	-	PREDICTED: zinc finger BED domain-containing protein 4 isoform X3 [Danio rerio]	-	-	-	-
Unigene0001257	14.66666667	21.66666667	1.4747	0.4594	0.6725	1.2877	0.2222	1.5183	0.868866667	1.0094	0.216291284	0.80190476	1	no	-	--	-	-	-	-
Unigene0001258	0	0.333333333	0	0	0	0.0277	0	0	0.001	0.009233333	3.20685157	1	1	no	-	--	-	-	-	-
Unigene0001259	34.33333333	39.33333333	0.8717	0.7738	1.0098	0.8795	1.3041	0.4	0.8851	0.8612	-0.039492143	0.965564235	1	no	-	--	-	-	-	-
Unigene0001260	1673	1818.333333	8.6637	9.3521	10.598	7.2193	8.4493	9.9374	9.537933333	8.535333333	-0.160229202	0.687219614	1	no	MCF2L	PREDICTED: guanine nucleotide exchange factor DBS-like [Sinocyclocheilus grahami]	-	-	-	-
Unigene0001261	285	224.6666667	1.8544	1.0923	2.8691	1.32	1.0252	1.3626	1.9386	1.235933333	-0.649414231	0.194792438	1	no	CDH1	PREDICTED: B-cadherin-like [Sinocyclocheilus grahami]	ko04514//Cell adhesion molecules (CAMs)//Signaling molecules and interaction//Environmental Information Processing;ko04520//Adherens junction//Cellular commiunity//Cellular Processes	-	-	-
Unigene0001262	4.333333333	3	0.6213	0.3025	0.0805	0.1817	0.2195	0.1817	0.334766667	0.1943	-0.784869982	0.50171217	1	no	-	--	-	-	-	-
Unigene0001263	14.33333333	18.33333333	1.2549	0.7716	0.8215	1.1328	1.182	0.7213	0.949333333	1.012033333	0.092270163	0.925188975	1	no	-	--	-	-	-	-
Unigene0001264	24.33333333	37	1.7087	1.2156	1.9073	2.6643	1.9809	1.3841	1.610533333	2.009766667	0.319489494	0.603001285	1	no	-	--	-	-	-	-
Unigene0001265	26.66666667	10.66666667	1.4669	0.8727	4.3077	0.4447	0.6141	1.0806	2.215766667	0.713133333	-1.63556222	0.037443697	1	no	-	--	-	-	-	-
Unigene0001266	120	204.6666667	3.9162	4.3209	2.1648	6.0611	5.4102	3.3488	3.4673	4.940033333	0.510708109	0.319193019	1	no	-	--	-	-	-	-
Unigene0001267	0	1	0	0	0	0.0743	0.0897	0.0743	0.001	0.079433333	6.311672641	0.305939591	1	no	-	--	-	-	-	-
Unigene0001268	1673	4800.666667	125.6527	1.1762	33.9102	267.0436	40.6098	56.3713	53.5797	121.3415667	1.179315435	0.235545397	1	no	APOC2	apolipoprotein C-II [Hemibarbus mylodon]	-	-	-	-
Unigene0001269	333	458.3333333	2.098	1.9363	2.4073	2.1559	2.2602	2.8526	2.1472	2.4229	0.174278285	0.689101521	1	no	ATF2	PREDICTED: cyclic AMP-dependent transcription factor ATF-2-like [Sinocyclocheilus anshuiensis]	ko04010//MAPK signaling pathway//Signal transduction//Environmental Information Processing;ko04261//Adrenergic signaling in cardiomyocytes//Circulatory system//Organismal Systems	-	-	-
Unigene0001270	53.66666667	60.66666667	1.5317	0.8698	1.0363	1.5258	0.9017	0.7467	1.145933333	1.058066667	-0.115092584	0.85519483	1	no	-	--	-	-	-	-
Unigene0001271	20.66666667	27.33333333	1.2253	0.3212	1.4165	0.9185	0.8878	1.3601	0.987666667	1.055466667	0.095784891	0.903537226	1	no	-	--	-	-	-	-
Unigene0001272	108.3333333	55	2.093	0.6466	3.9216	0.3452	0.4929	1.8367	2.2204	0.8916	-1.316351077	0.0828288	1	no	bsx	brain-specific homeobox protein homolog [Danio rerio]	-	GO:0043226//organelle;GO:0043229//intracellular organelle;GO:0005623//cell;GO:0005622//intracellular;GO:0043231//intracellular membrane-bounded organelle;GO:0044424//intracellular part;GO:0043227//membrane-bounded organelle;GO:0044464//cell part	GO:0003677//DNA binding;GO:0001071//nucleic acid binding transcription factor activity;GO:0005488//binding;GO:1901363//heterocyclic compound binding;GO:0097159//organic cyclic compound binding;GO:0003676//nucleic acid binding	GO:1901576//organic substance biosynthetic process;GO:0009987//cellular process;GO:0046483//heterocycle metabolic process;GO:0006807//nitrogen compound metabolic process;GO:0009058//biosynthetic process;GO:0090304//nucleic acid metabolic process;GO:1901360//organic cyclic compound metabolic process;GO:0006139//nucleobase-containing compound metabolic process;GO:0044238//primary metabolic process;…
Unigene0001273	11.66666667	20.66666667	0.9482	0.9231	0.3276	1.1827	1.7266	0.4437	0.732966667	1.117666667	0.608670487	0.426788907	1	no	-	--	-	-	-	-
Unigene0001274	17.33333333	40.66666667	0.943	0.6386	0.5524	1.79	0.8496	1.4071	0.711333333	1.3489	0.923185723	0.135590568	1	no	-	--	-	-	-	-
Unigene0001275	236	265	22.4168	7.0321	30.2049	14.9524	18.2996	21.3711	19.8846	18.2077	-0.127102849	0.820797663	1	no	-	--	-	-	-	-
Unigene0001276	209	314.6666667	25.4213	11.0801	30.979	22.8047	26.4497	33.6015	22.49346667	27.61863333	0.296135907	0.559915387	1	no	-	--	-	-	-	-
Unigene0001277	35441.33333	39287	209.0907	77.5607	302.2568	165.2483	174.2425	192.2045	196.3027333	177.2317667	-0.147443048	0.752838509	1	no	pim2	PREDICTED: RNA-directed DNA polymerase from mobile element jockey-like [Sinocyclocheilus anshuiensis]	-	-	-	-
Unigene0001278	69.33333333	70.33333333	3.1405	4.1276	3.6348	3.5094	3.106	2.5313	3.6343	3.0489	-0.253388682	0.626177463	1	no	-	--	-	-	-	-
Unigene0001279	14.33333333	20.66666667	1.486	1.3616	0.906	1.0904	2.223	1.2954	1.2512	1.536266667	0.296116244	0.666356151	1	no	-	--	-	-	-	-
Unigene0001280	17.33333333	23	0.6095	1.1328	1.1486	1.2959	0.835	0.994	0.963633333	1.041633333	0.112291318	0.875125544	1	no	-	--	-	-	-	-
Unigene0001281	10.33333333	2.333333333	1.1993	0.4865	1.4502	0.1558	0.2824	0.1559	1.045333333	0.198033333	-2.400147866	0.00894265	0.901396828	no	-	--	-	-	-	-
Unigene0001282	2140.333333	2654	14.9053	13.055	12.6496	14.7054	13.047	13.674	13.53663333	13.8088	0.028718979	0.9407177	1	no	-	--	-	-	-	-
Unigene0001283	151.3333333	76	12.8069	4.2409	23.2071	2.8528	3.6928	9.5818	13.4183	5.3758	-1.319650534	0.052567512	1	no	-	--	-	-	-	-
Unigene0001284	23.66666667	25.33333333	2.194	1.3731	2.0304	1.5273	2.1404	1.3447	1.865833333	1.6708	-0.159281074	0.816858369	1	no	-	--	-	-	-	-
Unigene0001285	745	825.6666667	6.1578	5.5929	8.9221	5.6451	6.241	6.9149	6.890933333	6.267	-0.136924407	0.748212058	1	no	-	PREDICTED: uncharacterized protein LOC107758869 [Sinocyclocheilus rhinocerous]	-	-	-	-
Unigene0001286	1.333333333	3	0.0409	0.0797	0.0424	0.0957	0.0771	0.1277	0.054333333	0.100166667	0.882493026	0.50006303	1	no	-	--	-	-	-	-
Unigene0001287	0.666666667	0	0	0	0.2205	0	0	0	0.0735	0.001	-6.199672345	0.558962297	1	no	-	--	-	-	-	-
Unigene0001288	104.6666667	119.6666667	9.5407	6.9105	7.5946	6.7242	8.4834	7.6205	8.015266667	7.609366667	-0.074974137	0.887898694	1	no	-	--	-	-	-	-
Unigene0001289	18.66666667	14.33333333	1.6168	1.4241	1.2768	1.2005	0.5802	0.9008	1.439233333	0.893833333	-0.687222753	0.304471052	1	no	-	--	-	-	-	-
Unigene0001290	169.6666667	120	3.8681	2.193	5.66	1.6852	1.6288	3.3544	3.907033333	2.2228	-0.813695419	0.139614044	1	no	-	PREDICTED: alpha-tubulin N-acetyltransferase 1 isoform X3 [Sinocyclocheilus rhinocerous]	-	-	-	-
Unigene0001291	5	14.66666667	0.1055	0.1541	0	0.3702	0.2319	0.0412	0.086533333	0.214433333	1.309201305	0.212795118	1	no	-	PREDICTED: cell surface glycoprotein 1-like [Sinocyclocheilus anshuiensis]	-	-	-	-
Unigene0001292	582	601.3333333	2.9026	15.3605	2.4343	9.1459	5.5022	3.2411	6.899133333	5.963066667	-0.210360676	0.750592284	1	no	CD97	PREDICTED: CD97 antigen-like [Sinocyclocheilus grahami]	-	GO:0016020//membrane;GO:0044425//membrane part;GO:0031224//intrinsic component of membrane	GO:0004872//receptor activity;GO:0043167//ion binding;GO:0004871//signal transducer activity;GO:0043169//cation binding;GO:0046872//metal ion binding;GO:0005488//binding;GO:0060089//molecular transducer activity;GO:0038023//signaling receptor activity	GO:0065007//biological regulation;GO:0050794//regulation of cellular process;GO:0050789//regulation of biological process;GO:0023052//signaling;GO:0007186//G-protein coupled receptor signaling pathway;GO:0044699//single-organism process;GO:0044700//single organism signaling;GO:0044763//single-organism cellular process;GO:0007165//signal transduction;GO:0050896//response to stimulus;GO:0007154//ce…
Unigene0001293	14.66666667	57	1.5982	0.6668	0.2366	1.7355	1.1828	4.8975	0.833866667	2.605266667	1.643542426	0.034695298	1	no	-	PREDICTED: aryl hydrocarbon receptor repressor-like [Sinocyclocheilus grahami]	-	GO:0005623//cell;GO:0044424//intracellular part;GO:0043229//intracellular organelle;GO:0044464//cell part;GO:0043231//intracellular membrane-bounded organelle;GO:0043227//membrane-bounded organelle;GO:0043226//organelle;GO:0005622//intracellular	GO:0097159//organic cyclic compound binding;GO:1901363//heterocyclic compound binding;GO:0001076//transcription factor activity, RNA polymerase II transcription factor binding;GO:0005488//binding;GO:0000988//transcription factor activity, protein binding;GO:0000989//transcription factor activity, transcription factor binding;GO:0003676//nucleic acid binding	GO:0034654//nucleobase-containing compound biosynthetic process;GO:1901360//organic cyclic compound metabolic process;GO:0008152//metabolic process;GO:0046483//heterocycle metabolic process;GO:0044271//cellular nitrogen compound biosynthetic process;GO:0009987//cellular process;GO:0006139//nucleobase-containing compound metabolic process;GO:0019438//aromatic compound biosynthetic process;GO:00508…
Unigene0001294	51	73.33333333	1.5402	1.0584	2.0659	1.342	2.0481	2.1436	1.554833333	1.844566667	0.24652199	0.654327539	1	no	-	PREDICTED: zinc finger BED domain-containing protein 1-like [Cyprinus carpio]	-	-	-	-
Unigene0001295	3506	4364.333333	16.5839	15.434	15.2424	13.8379	19.5049	15.7781	15.75343333	16.37363333	0.055708207	0.884066097	1	no	SF1	PREDICTED: splicing factor 1 isoform X1 [Danio rerio]	-	-	GO:1901363//heterocyclic compound binding;GO:0043167//ion binding;GO:0003676//nucleic acid binding;GO:0046914//transition metal ion binding;GO:0097159//organic cyclic compound binding;GO:0005488//binding;GO:0043169//cation binding;GO:0046872//metal ion binding	GO:0007275//multicellular organism development;GO:0048731//system development;GO:0043010//camera-type eye development;GO:0044707//single-multicellular organism process;GO:0048856//anatomical structure development;GO:0007423//sensory organ development;GO:0032502//developmental process;GO:0001654//eye development;GO:0032501//multicellular organismal process;GO:0044699//single-organism process;GO:00…
Unigene0001296	18651	22397.33333	88.2501	66.8643	88.4846	74.2283	79.7476	86.6579	81.19966667	80.21126667	-0.01766891	0.962103941	1	no	TDRD6	PREDICTED: tudor domain-containing protein 6-like isoform X3 [Sinocyclocheilus rhinocerous]	-	-	-	-
Unigene0001297	1826.666667	2155.666667	15.624	13.5505	18.3008	11.4491	17.1424	17.7967	15.8251	15.46273333	-0.03341925	0.934659668	1	no	phactr1	PREDICTED: phosphatase and actin regulator 1-like isoform X2 [Sinocyclocheilus rhinocerous]	-	-	-	-
Unigene0001298	11	14.66666667	0.1484	1.0834	1.2303	0.6362	1.3976	0.7523	0.8207	0.9287	0.178357682	0.849204107	1	no	-	--	-	-	-	-
Unigene0001299	4	15.66666667	0.5907	0.3834	0.2041	1.0746	0.9274	1.7664	0.392733333	1.256133333	1.677367651	0.036106273	1	no	Tf2-6	PREDICTED: RNA-directed DNA polymerase homolog, partial [Danio rerio]	-	-	-	-
Unigene0001300	7.333333333	5.666666667	0.5946	0.3683	0.2241	0.2107	0.4073	0.1686	0.395666667	0.2622	-0.593617844	0.530891391	1	no	Plekhs1	PREDICTED: pleckstrin homology domain-containing family S member 1-like [Sinocyclocheilus anshuiensis]	-	-	-	-
Unigene0001301	37.66666667	89.33333333	1.9565	1.3008	2.1763	4.539	3.2364	2.7545	1.8112	3.509966667	0.954511466	0.080323645	1	no	-	PREDICTED: beta-taxilin isoform X1 [Salmo salar]	-	-	-	-
Unigene0001302	126	141	2.0268	3.1926	3.4225	1.74	3.5179	2.8599	2.880633333	2.705933333	-0.09025974	0.860955696	1	no	-	PREDICTED: proteoglycan 4-like [Cyprinus carpio]	-	-	-	-
Unigene0001303	7	10.66666667	1.2948	0.4584	0.732	1.193	1.1087	0.8263	0.8284	1.042666667	0.331878553	0.70688999	1	no	-	--	-	-	-	-
Unigene0001304	145	208.6666667	1.3628	4.1676	0.8291	4.5963	1.9673	1.0052	2.119833333	2.522933333	0.251151244	0.713301671	1	no	-	--	-	-	-	-
Unigene0001305	997.3333333	1497	6.5139	5.985	4.6276	7.8096	7.7315	5.8355	5.708833333	7.125533333	0.319802057	0.437272555	1	no	Mdc1	PREDICTED: mediator of DNA damage checkpoint protein 1-like isoform X1 [Sinocyclocheilus rhinocerous]	-	-	-	-
Unigene0001306	6038.666667	6568	102.7761	113.2199	79.1587	69.0914	110.31	90.1784	98.3849	89.85993333	-0.130758918	0.738058448	1	no	Thoc3	THO complex subunit 3 [Danio rerio]	ko03013//RNA transport//Translation//Genetic Information Processing;ko03040//Spliceosome//Transcription//Genetic Information Processing	-	-	-
Unigene0001307	20.33333333	4	2.9902	1.7675	1.771	0.0833	0.1006	0.833	2.176233333	0.338966667	-2.682617935	0.00230478	0.556125168	no	-	--	-	-	-	-
Unigene0001308	24.33333333	47.33333333	1.6162	1.6242	0.5404	1.2601	3.1429	1.9113	1.260266667	2.104766667	0.739931272	0.259359369	1	no	-	--	-	-	-	-
Unigene0001309	18.66666667	67.33333333	0.6963	0.2104	0.448	1.3104	1.3797	1.3298	0.451566667	1.339966667	1.569186213	0.009660457	0.925288762	no	POL	PREDICTED: gypsy retrotransposon integrase-like protein 1 [Danio rerio]	-	-	-	-
Unigene0001310	154	89.33333333	12.9722	3.6083	19.688	4.9966	3.4911	8.2514	12.0895	5.5797	-1.115495118	0.079436855	1	no	-	--	-	-	-	-
Unigene0001311	3659.666667	3683	13.1274	8.4616	21.0517	6.5488	11.1433	17.2914	14.21356667	11.66116667	-0.285556488	0.547855958	1	no	ptpru	receptor protein tyrosine phosphatase psi [Danio rerio]	-	GO:0016020//membrane;GO:0031224//intrinsic component of membrane;GO:0044425//membrane part	GO:0016788//hydrolase activity, acting on ester bonds;GO:0016791//phosphatase activity;GO:0042578//phosphoric ester hydrolase activity;GO:0004725//protein tyrosine phosphatase activity;GO:0016787//hydrolase activity;GO:0003824//catalytic activity;GO:0004721//phosphoprotein phosphatase activity	GO:0009888//tissue development;GO:0007389//pattern specification process;GO:0006793//phosphorus metabolic process;GO:0051716//cellular response to stimulus;GO:0044707//single-multicellular organism process;GO:0035282//segmentation;GO:0007166//cell surface receptor signaling pathway;GO:0048869//cellular developmental process;GO:0008152//metabolic process;GO:0048856//anatomical structure developmen…
Unigene0001312	70.66666667	49.33333333	5.4309	6.9531	3.3157	3.1321	2.5227	3.3657	5.233233333	3.006833333	-0.799457683	0.147124109	1	no	-	--	-	-	-	-
Unigene0001313	1299	1901	17.9583	19.2577	12.3649	22.5763	16.9754	20.0523	16.52696667	19.868	0.265624693	0.517633488	1	no	R3hcc1l	PREDICTED: coiled-coil domain-containing protein R3HCC1L-like [Sinocyclocheilus rhinocerous]	-	-	-	-
Unigene0001314	39	61.66666667	0.6955	0.7128	0.7399	0.9704	0.9137	0.9137	0.716066667	0.9326	0.381164519	0.475082633	1	no	-	PREDICTED: LOW QUALITY PROTEIN: oxygen-regulated protein 1-like [Sinocyclocheilus grahami]	-	-	-	-
Unigene0001315	10.66666667	23	0.6929	1.1993	0.5586	1.2605	2.6107	0.7207	0.816933333	1.530633333	0.905838468	0.226141003	1	no	-	--	-	-	-	-
Unigene0001316	24.33333333	54	2.01	1.7842	0.4902	2.7654	2.1717	2.9051	1.428133333	2.614066667	0.872165256	0.171030856	1	no	-	--	-	-	-	-
Unigene0001317	53.66666667	56	2.7206	1.4998	1.0532	2.1977	1.6364	0.7415	1.757866667	1.5252	-0.204827211	0.751146646	1	no	ZNF568	PREDICTED: gastrula zinc finger protein XlCGF57.1-like [Sinocyclocheilus grahami]	-	-	-	-
Unigene0001318	227.6666667	252.3333333	7.6368	9.1432	5.3555	7.6767	7.3463	5.4245	7.3785	6.815833333	-0.114437498	0.810389569	1	no	tmem14c	PREDICTED: transmembrane protein 14C-like [Sinocyclocheilus rhinocerous]	-	-	-	-
Unigene0001319	204	249.6666667	6.3997	3.4507	5.3065	6.7357	4.5442	3.8783	5.0523	5.052733333	0.000123734	1	1	no	Parm1	PREDICTED: cell wall integrity and stress response component 3-like [Cyprinus carpio]	-	-	-	-
Unigene0001320	23.33333333	44	0.6376	0.7162	0.3558	1.3192	0.924	0.44	0.569866667	0.8944	0.650295781	0.316261385	1	no	-	--	-	-	-	-
Unigene0001321	4	9.666666667	0.0953	0.8347	0.1975	0.3714	1.1666	0.8174	0.375833333	0.785133333	1.062844649	0.296200059	1	no	-	--	-	-	-	-
Unigene0001322	147.6666667	165.6666667	4.1818	6.8847	3.9468	5.5399	4.6435	3.7923	5.004433333	4.658566667	-0.103320578	0.835712742	1	no	-	--	-	-	-	-
Unigene0001323	1663	1969.666667	19.2029	20.3733	12.4315	16.7714	20.7448	14.1963	17.3359	17.2375	-0.008212185	0.98452901	1	no	mtfr1	PREDICTED: mitochondrial fission regulator 1-like isoform X2 [Sinocyclocheilus grahami]	-	GO:0043231//intracellular membrane-bounded organelle;GO:0005623//cell;GO:0005622//intracellular;GO:0043229//intracellular organelle;GO:0043226//organelle;GO:0044424//intracellular part;GO:0043227//membrane-bounded organelle;GO:0044464//cell part	-	GO:0016043//cellular component organization;GO:0045333//cellular respiration;GO:0008152//metabolic process;GO:0055114//oxidation-reduction process;GO:0071840//cellular component organization or biogenesis;GO:0009987//cellular process;GO:0015980//energy derivation by oxidation of organic compounds;GO:0044710//single-organism metabolic process;GO:0044237//cellular metabolic process;GO:0006091//gene…
Unigene0001324	78.66666667	77.33333333	1.6829	1.5213	1.5366	1.4838	1.0756	1.2502	1.580266667	1.269866667	-0.315491006	0.537150192	1	no	-	--	-	-	-	-
Unigene0001325	8.666666667	5.333333333	0.9994	0.3475	0.5179	0.2783	0.4707	0.2227	0.6216	0.3239	-0.940438036	0.277253938	1	no	-	--	-	-	-	-
Unigene0001326	813.6666667	1203.666667	6.8502	6.4861	5.8018	8.13	7.3447	7.8348	6.379366667	7.769833333	0.28447045	0.481921054	1	no	spty2d1	PREDICTED: protein SPT2 homolog isoform X4 [Cyprinus carpio]	-	-	-	-
Unigene0001327	9	6	0.2296	0.9688	0.8727	0.8355	0	0.2388	0.690366667	0.3581	-0.947000289	0.366496076	1	no	-	PREDICTED: sentrin-specific protease 5 isoform X3 [Austrofundulus limnaeus]	-	-	-	-
Unigene0001328	583.6666667	523.3333333	5.4685	3.3562	6.6383	3.4107	3.0658	4.7637	5.154333333	3.746733333	-0.46015254	0.31212976	1	no	-	PREDICTED: MORC family CW-type zinc finger protein 3-like [Sinocyclocheilus rhinocerous]	-	-	-	-
Unigene0001329	432.6666667	711	3.1561	4.0355	2.216	4.2919	5.3154	3.4034	3.135866667	4.3369	0.467799959	0.295931061	1	no	PCSK5	PREDICTED: proprotein convertase subtilisin/kexin type 5-like [Danio rerio]	-	-	-	-
Unigene0001330	5.333333333	8.666666667	0.1059	0.6188	0.9882	0.6608	0.8981	0.7437	0.570966667	0.767533333	0.426822884	0.682389903	1	no	-	--	-	-	-	-
Unigene0001331	544.6666667	803.6666667	7.7759	5.7782	4.6831	10.0547	6.326	5.6825	6.079066667	7.3544	0.274757805	0.539940935	1	no	NR1H3	PREDICTED: oxysterols receptor LXR-alpha-like [Sinocyclocheilus anshuiensis]	ko03320//PPAR signaling pathway//Endocrine system//Organismal Systems	GO:0044464//cell part;GO:0044424//intracellular part;GO:0043229//intracellular organelle;GO:0043226//organelle;GO:0005622//intracellular;GO:0043231//intracellular membrane-bounded organelle;GO:0043227//membrane-bounded organelle;GO:0005623//cell	GO:0003700//transcription factor activity, sequence-specific DNA binding;GO:0097159//organic cyclic compound binding;GO:0003676//nucleic acid binding;GO:0005488//binding;GO:0003677//DNA binding;GO:0043169//cation binding;GO:0001071//nucleic acid binding transcription factor activity;GO:1901363//heterocyclic compound binding;GO:0046914//transition metal ion binding;GO:0004871//signal transducer ac…	GO:0044271//cellular nitrogen compound biosynthetic process;GO:0051716//cellular response to stimulus;GO:0010467//gene expression;GO:0032774//RNA biosynthetic process;GO:0044238//primary metabolic process;GO:0050896//response to stimulus;GO:0044260//cellular macromolecule metabolic process;GO:0034654//nucleobase-containing compound biosynthetic process;GO:0009058//biosynthetic process;GO:0043170/…
Unigene0001332	4485.333333	7918.666667	11.5374	13.376	8.1911	15.9348	18.7084	14.2559	11.03483333	16.2997	0.562780572	0.149254482	1	no	BPTF	PREDICTED: nucleosome-remodeling factor subunit BPTF isoform X4 [Danio rerio]	-	-	-	-
Unigene0001333	33.33333333	25.33333333	1.2039	1.0621	1.5207	1.0559	0.6378	0.6456	1.262233333	0.779766667	-0.694864239	0.241810094	1	no	-	--	-	-	-	-
Unigene0001334	48.66666667	56.66666667	1.3216	0.6433	1.9451	1.8341	0.473	1.2783	1.303333333	1.195133333	-0.125034527	0.86239825	1	no	IGHV3-23	immunoglobulin HY heavy chain [Ctenopharyngodon idella]	-	-	-	-
Unigene0001335	665.3333333	1321.666667	3.8709	105.518	24.1429	184.1431	13.0491	14.9908	44.5106	70.72766667	0.668125719	0.502524173	1	no	IGHV3-23	immunoglobulin HY heavy chain [Ctenopharyngodon idella]	-	-	-	-
Unigene0001336	12	26.66666667	0.859	1.2544	0.4452	0.9487	2.3598	1.5634	0.852866667	1.623966667	0.9291299	0.175581571	1	no	-	--	-	-	-	-
Unigene0001337	6424.666667	8164.333333	69.7151	111.3194	58.6815	90.8889	104.5393	61.0606	79.90533333	85.49626667	0.097569624	0.814049292	1	no	CTSA	PREDICTED: lysosomal protective protein-like [Sinocyclocheilus grahami]	ko04142//Lysosome//Transport and catabolism//Cellular Processes	-	GO:0004180//carboxypeptidase activity;GO:0016787//hydrolase activity;GO:0070011//peptidase activity, acting on L-amino acid peptides;GO:0008233//peptidase activity;GO:0008238//exopeptidase activity;GO:0003824//catalytic activity	GO:0043170//macromolecule metabolic process;GO:0044238//primary metabolic process;GO:0010467//gene expression;GO:0006508//proteolysis;GO:0016485//protein processing;GO:0008152//metabolic process;GO:0051604//protein maturation;GO:0071704//organic substance metabolic process;GO:0019538//protein metabolic process
Unigene0001338	3	2	0.1246	0.1213	0.323	0	0.1174	0.1944	0.189633333	0.103933333	-0.867554153	0.49038306	1	no	-	--	-	-	-	-
Unigene0001339	137	531	4.112	0.0105	0.3244	10.7703	1.0776	1.7426	1.4823	4.530166667	1.611726667	0.178567651	1	no	ETNK1	PREDICTED: ethanolamine kinase 1-like isoform X2 [Sinocyclocheilus anshuiensis]	ko01100//Metabolic pathways//Global and Overview//Metabolism;ko00564//Glycerophospholipid metabolism//Lipid metabolism//Metabolism	-	GO:0016740//transferase activity;GO:0003824//catalytic activity	GO:0044237//cellular metabolic process;GO:0006793//phosphorus metabolic process;GO:0008152//metabolic process;GO:0009987//cellular process;GO:0006796//phosphate-containing compound metabolic process
Unigene0001340	13	19.66666667	0.5414	0.4393	0.795	0.5628	0.51	1.091	0.5919	0.721266667	0.285179294	0.680719527	1	no	-	--	-	-	-	-
Unigene0001341	9.333333333	10	0.291	1.7001	0.7039	1.1345	1.1879	0.1513	0.898333333	0.824566667	-0.123614726	0.955775343	1	no	-	--	-	-	-	-
Unigene0001342	20.33333333	41	0.9751	1.0253	0.3639	2.1895	1.6533	0.1826	0.7881	1.3418	0.767719042	0.348358535	1	no	-	--	-	-	-	-
Unigene0001343	430	553.3333333	10.2796	13.5869	7.22	9.8812	13.9657	9.8671	10.36216667	11.238	0.117059612	0.796825271	1	no	immp2l	PREDICTED: mitochondrial inner membrane protease subunit 2 isoform X2 [Sinocyclocheilus rhinocerous]	ko03060//Protein export//Folding, sorting and degradation//Genetic Information Processing	GO:0005740//mitochondrial envelope;GO:0005623//cell;GO:0005739//mitochondrion;GO:0005622//intracellular;GO:0044429//mitochondrial part;GO:0031090//organelle membrane;GO:0043226//organelle;GO:0005743//mitochondrial inner membrane;GO:0043227//membrane-bounded organelle;GO:0031975//envelope;GO:0044446//intracellular organelle part;GO:0044424//intracellular part;GO:0005737//cytoplasm;GO:0043229//intr…	GO:0003824//catalytic activity;GO:0070011//peptidase activity, acting on L-amino acid peptides;GO:0008233//peptidase activity;GO:0016787//hydrolase activity	GO:0071704//organic substance metabolic process;GO:0008152//metabolic process;GO:0016485//protein processing;GO:0019538//protein metabolic process;GO:0010467//gene expression;GO:0006508//proteolysis;GO:0043170//macromolecule metabolic process;GO:0051604//protein maturation;GO:0044238//primary metabolic process
Unigene0001344	105.6666667	98.66666667	1.4743	0.9317	1.7291	0.7763	1.0476	1.3416	1.378366667	1.055166667	-0.385488823	0.46327315	1	no	GNAT2	PREDICTED: guanine nucleotide-binding protein G(t) subunit alpha-2-like isoform X1 [Sinocyclocheilus anshuiensis]	ko04744//Phototransduction//Sensory system//Organismal Systems	-	GO:0001883//purine nucleoside binding;GO:0017111//nucleoside-triphosphatase activity;GO:0005515//protein binding;GO:0016818//hydrolase activity, acting on acid anhydrides, in phosphorus-containing anhydrides;GO:1901265//nucleoside phosphate binding;GO:0017076//purine nucleotide binding;GO:0032550//purine ribonucleoside binding;GO:0016462//pyrophosphatase activity;GO:1901363//heterocyclic compound…	GO:0006725//cellular aromatic compound metabolic process;GO:0046434//organophosphate catabolic process;GO:0009056//catabolic process;GO:0009259//ribonucleotide metabolic process;GO:0044710//single-organism metabolic process;GO:0044281//small molecule metabolic process;GO:0006195//purine nucleotide catabolic process;GO:0044700//single organism signaling;GO:0007187//G-protein coupled receptor signa…
Unigene0001345	19	13.66666667	0.9583	1.0178	0.4966	0.4075	0.5334	0.5437	0.824233333	0.494866667	-0.736012942	0.267495803	1	no	-	PREDICTED: OTU domain-containing protein 6B isoform X1 [Danio rerio]	-	-	-	-
Unigene0001346	212	298.3333333	5.9651	9.0262	6.6773	8.7165	8.2514	8.2422	7.222866667	8.403366667	0.218395896	0.63630883	1	no	-	--	-	-	-	-
Unigene0001347	85.33333333	144.6666667	2.5902	1.8401	1.5479	3.1655	2.6815	2.5118	1.992733333	2.786266667	0.483584679	0.334480972	1	no	-	--	-	-	-	-
Unigene0001348	77.33333333	50.66666667	5.0074	2.878	6.2531	2.4929	2.3867	2.6823	4.712833333	2.520633333	-0.902808392	0.098458644	1	no	-	--	-	-	-	-
Unigene0001349	23.33333333	18.66666667	0.9905	0.7547	1.2944	0.7722	0.9735	0.3023	1.0132	0.682666667	-0.569665768	0.402689205	1	no	-	--	-	-	-	-
Unigene0001350	44	63.33333333	2.8176	1.3965	2.6018	3.6744	2.4609	1.8781	2.271966667	2.671133333	0.233510324	0.698023607	1	no	-	--	-	-	-	-
Unigene0001351	14.33333333	15.66666667	0.3724	1.0072	0.386	0.1936	0.8575	0.6133	0.588533333	0.5548	-0.085156341	0.932353327	1	no	tenm4	PREDICTED: teneurin-4-like [Cyprinus carpio]	-	GO:0044425//membrane part;GO:0005623//cell;GO:0005622//intracellular;GO:0043227//membrane-bounded organelle;GO:0043229//intracellular organelle;GO:0016021//integral component of membrane;GO:0042995//cell projection;GO:0016020//membrane;GO:0043231//intracellular membrane-bounded organelle;GO:0044424//intracellular part;GO:0044464//cell part;GO:0043226//organelle;GO:0031224//intrinsic component of …	GO:0005488//binding;GO:0005515//protein binding;GO:0046983//protein dimerization activity	GO:0044699//single-organism process;GO:0044763//single-organism cellular process;GO:0048468//cell development;GO:0007275//multicellular organism development;GO:0030154//cell differentiation;GO:0098609//cell-cell adhesion;GO:0010720//positive regulation of cell development;GO:0048699//generation of neurons;GO:0048709//oligodendrocyte differentiation;GO:0014015//positive regulation of gliogenesis;G…
Unigene0001352	0	0	0	0	0	0	0	0	0.001	0.001	0	notest	notest	notest	-	--	-	-	-	-
Unigene0001353	9468	11826	91.6896	109.5598	82.1155	71.7021	124.4148	101.3944	94.45496667	99.17043333	0.070283401	0.857109228	1	no	mcm5	DNA replication licensing factor MCM5 [Danio rerio]	ko04110//Cell cycle//Cell growth and death//Cellular Processes;ko03030//DNA replication//Replication and repair//Genetic Information Processing	GO:0043226//organelle;GO:0043227//membrane-bounded organelle;GO:0005623//cell;GO:0043231//intracellular membrane-bounded organelle;GO:0044424//intracellular part;GO:0043229//intracellular organelle;GO:0044464//cell part;GO:0043234//protein complex;GO:0005622//intracellular;GO:0032991//macromolecular complex	GO:0003824//catalytic activity;GO:0032549//ribonucleoside binding;GO:0016462//pyrophosphatase activity;GO:0016818//hydrolase activity, acting on acid anhydrides, in phosphorus-containing anhydrides;GO:0097159//organic cyclic compound binding;GO:0001882//nucleoside binding;GO:0017111//nucleoside-triphosphatase activity;GO:0016787//hydrolase activity;GO:0036094//small molecule binding;GO:0003676//n…	GO:0044699//single-organism process;GO:0006996//organelle organization;GO:0051276//chromosome organization;GO:0044767//single-organism developmental process;GO:0071840//cellular component organization or biogenesis;GO:0071103//DNA conformation change;GO:0032501//multicellular organismal process;GO:0032502//developmental process;GO:0009987//cellular process;GO:0044707//single-multicellular organis…
Unigene0001354	24	18	0.3813	0.4283	1.3376	0.5031	0.2486	0.5262	0.715733333	0.425966667	-0.748681632	0.308426398	1	no	-	--	-	-	-	-
Unigene0001355	6.333333333	10.33333333	0.1778	0.5192	0.4299	0.6929	0.1116	0.647	0.375633333	0.483833333	0.365185074	0.723060076	1	no	NXPE3	PREDICTED: NXPE family member 3-like [Danio rerio]	-	-	-	-
Unigene0001356	12.66666667	19.66666667	1.285	0.2085	1.2579	0.6679	1.7483	1.1694	0.917133333	1.1952	0.382048659	0.632975381	1	no	-	--	-	-	-	-
Unigene0001357	11	24.66666667	0.8063	0.6642	0.5786	1.354	1.4606	1.016	0.683033333	1.276866667	0.902579992	0.153578589	1	no	-	--	-	-	-	-
Unigene0001358	207.3333333	346.3333333	4.0857	4.5057	2.6233	6.7936	4.0698	4.4843	3.738233333	5.1159	0.452631442	0.344528072	1	no	-	--	-	-	-	-
Unigene0001359	6	26	0.8937	0.1582	0.421	3.1036	1.2244	0.8238	0.490966667	1.717266667	1.806417103	0.029506257	1	no	PEG10	PREDICTED: large proline-rich protein BAG6-like [Cyprinus carpio]	-	-	-	-
Unigene0001360	0	0.666666667	0	0	0	0	0	0.1126	0.001	0.037533333	5.230100516	0.5557201	1	no	-	PREDICTED: uncharacterized protein LOC107708282 [Sinocyclocheilus rhinocerous]	-	-	-	-
Unigene0001361	22	40	0.4455	0.9639	0.2052	1.1772	0.7927	0.4827	0.5382	0.817533333	0.603135164	0.390426513	1	no	GIMAP7	PREDICTED: GTPase IMAP family member 4-like, partial [Danio rerio]	-	-	-	-
Unigene0001362	286.3333333	491.6666667	1.6487	2.7051	1.2595	2.9498	2.116	2.8539	1.8711	2.6399	0.496596616	0.291179857	1	no	Rnf165	PREDICTED: RING finger protein 165-like [Sinocyclocheilus rhinocerous]	-	-	GO:0005488//binding;GO:0043169//cation binding;GO:0043167//ion binding	-
Unigene0001363	90.33333333	73.66666667	1.6948	1.2806	3.9853	1.3214	1.0722	2.1507	2.320233333	1.514766667	-0.615174317	0.305951751	1	no	-	--	-	-	-	-
Unigene0001364	39.33333333	57	1.1574	1.7897	1.0585	1.7251	1.4109	1.6463	1.3352	1.5941	0.255686275	0.649615237	1	no	ZNF568	PREDICTED: gastrula zinc finger protein XlCGF8.2DB-like, partial [Sinocyclocheilus rhinocerous]	-	-	-	-
Unigene0001365	1816.666667	2016.333333	27.2678	32.5587	18.9619	24.819	27.9099	20.4552	26.2628	24.3947	-0.106452995	0.795903512	1	no	THUMPD3	PREDICTED: THUMP domain-containing protein 3-like isoform X2 [Sinocyclocheilus anshuiensis]	-	-	-	-
Unigene0001366	83.33333333	163.6666667	2.2906	1.8351	1.8548	3.7577	4.6747	1.5075	1.9935	3.3133	0.732965232	0.182862218	1	no	Esm1	PREDICTED: endothelial cell-specific molecule 1-like [Sinocyclocheilus anshuiensis]	-	-	GO:0019838//growth factor binding;GO:0005515//protein binding;GO:0005488//binding	GO:0009987//cellular process;GO:0044763//single-organism cellular process;GO:0016049//cell growth;GO:0044699//single-organism process;GO:0040007//growth
Unigene0001367	1972	1567	8.0522	4.7386	17.3146	4.068	4.6554	10.4368	10.03513333	6.386733333	-0.651909666	0.224723334	1	no	Itga9	PREDICTED: integrin alpha-9-like [Sinocyclocheilus anshuiensis]	ko04510//Focal adhesion//Cellular commiunity//Cellular Processes;ko04810//Regulation of actin cytoskeleton//Cell motility//Cellular Processes;ko04514//Cell adhesion molecules (CAMs)//Signaling molecules and interaction//Environmental Information Processing;ko04512//ECM-receptor interaction//Signaling molecules and interaction//Environmental Information Processing	-	-	-
Unigene0001368	29.66666667	56.33333333	1.3178	0.6571	0.8995	1.704	1.544	1.2536	0.958133333	1.500533333	0.647177028	0.251341999	1	no	-	--	-	-	-	-
Unigene0001369	529.3333333	637.3333333	7.2475	11.6881	5.9769	9.3355	9.1714	6.5626	8.304166667	8.3565	0.009063417	0.985632279	1	no	-	PREDICTED: structural maintenance of chromosomes protein 5-like [Sinocyclocheilus rhinocerous]	-	-	-	-
Unigene0001370	129	148.3333333	6.5587	8.0912	4.6703	5.0743	7.6868	5.936	6.440066667	6.232366667	-0.04729551	0.927210101	1	no	-	PREDICTED: PWWP domain-containing protein MUM1-like [Cyprinus carpio]	-	-	-	-
Unigene0001371	23.66666667	30.66666667	1.5247	1.7043	0.7609	1.0126	1.7553	1.5857	1.329966667	1.4512	0.125856273	0.858784774	1	no	-	PREDICTED: uncharacterized protein LOC109197426 [Oreochromis niloticus]	-	-	-	-
Unigene0001372	38.66666667	19.33333333	0.9904	0.2799	2.5166	0.0249	0.4213	1.0716	1.2623	0.505933333	-1.319035625	0.173141165	1	no	-	--	-	-	-	-
Unigene0001373	162	232.6666667	3.6565	5.0751	3.2521	5.5089	3.0253	5.4345	3.994566667	4.656233333	0.221124349	0.655326001	1	no	-	--	-	-	-	-
Unigene0001374	7	11.66666667	0.8594	0.6085	0.162	1.0355	0.8831	0.3656	0.5433	0.7614	0.486905523	0.599978536	1	no	-	--	-	-	-	-
Unigene0001375	0.333333333	4	0	0	0.0773	0.1163	0.3514	0.291	0.025766667	0.2529	3.294989218	0.041999954	1	no	-	--	-	-	-	-
Unigene0001376	18.33333333	63	1.2944	0.2585	0.2752	3.5708	1.4068	0.1553	0.609366667	1.710966667	1.489429164	0.10588544	1	no	-	PREDICTED: coxsackievirus and adenovirus receptor homolog [Sinocyclocheilus rhinocerous]	-	-	-	-
Unigene0001377	97.66666667	79.33333333	2.2038	1.0728	2.5493	0.8131	1.4457	1.6423	1.941966667	1.300366667	-0.578599958	0.302305983	1	no	-	PREDICTED: SLAM family member 5-like [Sinocyclocheilus grahami]	-	-	-	-
Unigene0001378	10.66666667	16.66666667	0.779	0.7	0.4347	0.6073	1.1853	0.7478	0.6379	0.8468	0.408690991	0.592225713	1	no	-	PREDICTED: protein FAM188B2-like isoform X1 [Sinocyclocheilus rhinocerous]	-	-	-	-
Unigene0001379	0	166.6666667	0	0	0	0	28.1511	24.0703	0.001	17.40713333	14.08739101	1.95E-07	0.001137797	yes	-	--	-	-	-	-
Unigene0001380	41.66666667	36.66666667	1.0755	2.0942	1.0103	1.9129	0.7915	0.3146	1.393333333	1.006333333	-0.469432185	0.503177371	1	no	-	--	-	-	-	-
Unigene0001381	24	14.66666667	2.303	0.531	1.5704	0.8033	0.2854	1.04	1.468133333	0.709566667	-1.048972854	0.162810368	1	no	-	--	-	-	-	-
Unigene0001382	77	87.33333333	0.6396	7.0321	0.8578	1.7598	3.8979	2.6997	2.843166667	2.7858	-0.029406986	0.976140992	1	no	-	Ig kappa chain V-IV region JI precursor [Salmo salar]	-	-	-	-
Unigene0001383	1	0	0	0.3755	0	0	0	0	0.125166667	0.001	-6.967706597	0.350570289	1	no	-	Ig kappa chain V-IV region JI precursor [Salmo salar]	-	-	-	-
Unigene0001384	843	373.6666667	3.8994	87.2763	4.2417	21.2205	8.0368	5.8724	31.8058	11.7099	-1.441561119	0.120425211	1	no	IGLL5	immunoglobulin light chain, partial [Danio rerio]	-	-	-	-
Unigene0001385	22	24.33333333	0.7955	0.4518	0.962	0.7494	0.7493	0.5171	0.736433333	0.671933333	-0.132236828	0.865068635	1	no	-	PREDICTED: nesprin-1-like [Sinocyclocheilus grahami]	-	-	-	-
Unigene0001386	63.66666667	80.33333333	3.0589	1.6963	2.6889	2.6565	2.5166	2.537	2.481366667	2.570033333	0.050652136	0.937901441	1	no	-	--	-	-	-	-
Unigene0001387	877.6666667	1238	7.0424	7.1886	5.7577	8.4665	7.7557	7.0914	6.6629	7.7712	0.22198715	0.585065852	1	no	-	PREDICTED: uncharacterized protein KIAA2013 homolog [Sinocyclocheilus anshuiensis]	-	-	-	-
Unigene0001388	0	14.66666667	0	0	0	2.6183	0	0	0.001	0.872766667	9.769452192	0.0061922	0.816296501	no	ORF3	--	-	-	-	-
Unigene0001389	16	27	0.5505	0.5955	1.8385	1.2399	1.9013	1.0496	0.994833333	1.396933333	0.489736419	0.481106343	1	no	-	--	-	-	-	-
Unigene0001390	733.6666667	673.3333333	14.4431	11.1785	14.315	7.3755	10.2712	12.5614	13.3122	10.06936667	-0.402776069	0.350605752	1	no	-	--	-	-	-	-
Unigene0001391	136	224.6666667	5.1081	5.8926	3.2274	6.3282	7.9751	5.4581	4.7427	6.587133333	0.473942139	0.333909115	1	no	-	PREDICTED: potassium voltage-gated channel subfamily V member 1 isoform X4 [Austrofundulus limnaeus]	-	-	-	-
Unigene0001392	4	10	0.1203	0	0.1745	0.3376	0.2266	0.0375	0.098266667	0.200566667	1.029307832	0.35641293	1	no	-	--	-	-	-	-
Unigene0001393	113.3333333	142.6666667	0.6739	2.343	1.0477	1.8481	1.0881	1.2671	1.354866667	1.4011	0.048409046	0.935302391	1	no	-	PREDICTED: probable E3 ubiquitin-protein ligase RNF144A-A [Cyprinus carpio]	-	-	-	-
Unigene0001394	854.3333333	1154.666667	7.7123	7.4434	6.2067	9.188	8.5431	6.2366	7.1208	7.989233333	0.166017733	0.689986279	1	no	Ccdc85b	PREDICTED: coiled-coil domain-containing protein 85B-like [Sinocyclocheilus anshuiensis]	-	-	-	-
Unigene0001395	1796.666667	5663.666667	24.8112	20.9679	34.7131	112.2507	66.511	28.9315	26.83073333	69.23106667	1.36753309	0.005811767	0.799943532	no	ZP3	zona pellucid glycoprotein 3 [Culter alburnus]	-	-	-	-
Unigene0001396	7.666666667	6.666666667	0.4871	0.7706	0.1262	0.3323	0.2867	0.3799	0.4613	0.332966667	-0.470327536	0.625899998	1	no	-	--	-	-	-	-
Unigene0001397	35.33333333	47.33333333	1.9819	1.2863	3.1746	2.3879	1.8102	2.7639	2.1476	2.320666667	0.111814003	0.869970969	1	no	-	--	-	-	-	-
Unigene0001398	9.333333333	12	0.4777	0.6717	0.3301	0.5379	0.6499	0.414	0.493166667	0.533933333	0.114584328	0.947909797	1	no	-	--	-	-	-	-
Unigene0001399	28.33333333	39	1.7779	2.8649	0.5084	2.5333	1.6747	1.6737	1.717066667	1.960566667	0.191324645	0.790082551	1	no	-	--	-	-	-	-
Unigene0001400	49.66666667	100	1.2809	0.4425	0.3283	1.4818	1.427	0.5586	0.6839	1.1558	0.757034481	0.243449236	1	no	pol	LReO_3 [Oryzias latipes]	-	-	-	-
Unigene0001401	73.33333333	115.6666667	7.9532	4.2097	4.882	6.6822	9.4551	6.3843	5.681633333	7.5072	0.401969189	0.445961951	1	no	BR2	PREDICTED: integumentary mucin A.1-like isoform X1 [Xenopus tropicalis]	ko04512//ECM-receptor interaction//Signaling molecules and interaction//Environmental Information Processing	-	-	-
Unigene0001402	12.66666667	10.66666667	0.6722	1.3089	0.5574	0.9957	0.5065	0.2622	0.846166667	0.588133333	-0.524798595	0.543636673	1	no	-	--	-	-	-	-
Unigene0001403	1642	2253.666667	14.8929	13.0223	10.8257	14.4356	17.6849	12.3585	12.91363333	14.82633333	0.199266883	0.61940097	1	no	Mapre3	microtubule-associated protein RP/EB family member 3 [Danio rerio]	-	-	GO:0008092//cytoskeletal protein binding;GO:0015631//tubulin binding;GO:0005488//binding;GO:0005515//protein binding	-
Unigene0001404	1754.666667	1772.666667	8.1899	5.079	12.0985	5.1036	5.7307	9.9113	8.4558	6.9152	-0.290170277	0.530178749	1	no	tshz1	PREDICTED: LOW QUALITY PROTEIN: teashirt homolog 1-like [Cyprinus carpio]	-	GO:0043231//intracellular membrane-bounded organelle;GO:0005622//intracellular;GO:0043227//membrane-bounded organelle;GO:0043229//intracellular organelle;GO:0005623//cell;GO:0043226//organelle;GO:0044464//cell part;GO:0044424//intracellular part	GO:0003676//nucleic acid binding;GO:1901363//heterocyclic compound binding;GO:0043169//cation binding;GO:0043167//ion binding;GO:0097159//organic cyclic compound binding;GO:0003677//DNA binding;GO:0005488//binding	GO:0090304//nucleic acid metabolic process;GO:0032774//RNA biosynthetic process;GO:1901360//organic cyclic compound metabolic process;GO:0071704//organic substance metabolic process;GO:1901362//organic cyclic compound biosynthetic process;GO:0044699//single-organism process;GO:0008152//metabolic process;GO:0034654//nucleobase-containing compound biosynthetic process;GO:0006351//transcription, DNA…
Unigene0001405	1150	1845	10.5731	12.3369	7.0501	15.5764	12.8713	11.3586	9.9867	13.26876667	0.40995434	0.329052417	1	no	tcf3	transcription factor E2-alpha [Danio rerio]	-	-	-	GO:0061061//muscle structure development;GO:0042692//muscle cell differentiation;GO:0044763//single-organism cellular process;GO:0032502//developmental process;GO:0044699//single-organism process;GO:0048856//anatomical structure development;GO:0051146//striated muscle cell differentiation;GO:0009987//cellular process;GO:0048869//cellular developmental process;GO:0044767//single-organism developme…
Unigene0001406	5.666666667	15.33333333	0	1.8732	0	2.0296	0.8529	1.3243	0.6244	1.402266667	1.167218288	0.322917489	1	no	-	PREDICTED: interferon-induced very large GTPase 1-like [Danio rerio]	-	-	-	-
Unigene0001407	272.6666667	584.6666667	8.5924	3.4073	4.137	16.6476	5.5746	5.6286	5.3789	9.2836	0.787373195	0.161382646	1	no	-	--	-	-	-	-
Unigene0001408	46.33333333	48	1.6434	1.7487	1.941	1.8176	1.6199	1.1328	1.7777	1.523433333	-0.222685511	0.689115554	1	no	-	--	-	-	-	-
Unigene0001409	9	8.333333333	0.5518	1.0147	0.0635	0.5736	0.1155	0.526	0.543333333	0.405033333	-0.423796915	0.716544525	1	no	-	--	-	-	-	-
Unigene0001410	19.66666667	25.33333333	0.8743	1.8525	0.2665	1.4434	0.7266	1.0029	0.997766667	1.057633333	0.084065174	0.927341283	1	no	-	--	-	-	-	-
Unigene0001411	38	42.66666667	2.9983	2.2935	2.8857	2.0593	2.8914	2.6728	2.725833333	2.541166667	-0.101206354	0.877101179	1	no	-	--	-	-	-	-
Unigene0001412	38	60.66666667	2.1694	0.792	2.2486	1.9732	2.7246	2.1857	1.736666667	2.2945	0.401858935	0.494454314	1	no	-	--	-	-	-	-
Unigene0001413	107	127	5.6257	6.8923	7.8619	7.4414	8.395	4.3881	6.7933	6.7415	-0.011042936	0.987038728	1	no	-	--	-	-	-	-
Unigene0001414	285.6666667	307.6666667	4.8764	2.7908	5.8132	3.741	4.285	3.9252	4.493466667	3.983733333	-0.173707822	0.711179022	1	no	-	--	-	-	-	-
Unigene0001415	13.66666667	14	0.1589	0.4641	1.5922	0.7021	0.3991	0.7024	0.7384	0.6012	-0.296557544	0.731869629	1	no	-	--	-	-	-	-
Unigene0001416	4.666666667	3	0.1269	0.2883	0.1754	0.033	0.0797	0.198	0.196866667	0.103566667	-0.926659115	0.429180236	1	no	-	PREDICTED: ATP-binding cassette sub-family B member 8, mitochondrial-like [Xenopus tropicalis]	-	-	-	-
Unigene0001417	8.333333333	3.333333333	0.1088	0.1059	1.1837	0.1696	0	0.2545	0.466133333	0.141366667	-1.721300702	0.159452747	1	no	-	--	-	-	-	-
Unigene0001418	851.3333333	1040	11.5664	13.634	10.165	12.6246	14.3392	9.2057	11.78846667	12.0565	0.032435076	0.939659751	1	no	POGLUT1	PREDICTED: protein O-glucosyltransferase 1 [Sinocyclocheilus grahami]	ko00514//Other types of O-glycan biosynthesis//Glycan biosynthesis and metabolism//Metabolism	-	-	-
Unigene0001419	23.33333333	27.66666667	0.9276	0.7162	0.5968	0.6983	0.9641	0.5739	0.746866667	0.745433333	-0.002771378	1	1	no	-	--	-	-	-	-
Unigene0001420	827	1174.333333	10.0239	13.5296	10.2765	12.9931	15.0169	12.0421	11.27666667	13.3507	0.24357471	0.555038819	1	no	nabp2-b	PREDICTED: SOSS complex subunit B1-A-like [Cyprinus carpio]	-	-	-	-
Unigene0001421	19	16	0.9809	1.0112	1.3157	0.7648	0.924	0.6301	1.1026	0.772966667	-0.512431401	0.424018616	1	no	ADORA1	PREDICTED: adenosine receptor A1-like [Danio rerio]	ko04080//Neuroactive ligand-receptor interaction//Signaling molecules and interaction//Environmental Information Processing	-	-	-
Unigene0001422	873.6666667	1318.333333	10.4084	13.0021	9.4363	14.147	14.7413	12.3248	10.94893333	13.7377	0.327350158	0.42389665	1	no	SLC35F6	PREDICTED: solute carrier family 35 member F6-like isoform X1 [Sinocyclocheilus rhinocerous]	-	GO:0031224//intrinsic component of membrane;GO:0016020//membrane;GO:0044425//membrane part	-	GO:0051234//establishment of localization;GO:0051179//localization
Unigene0001423	873.3333333	876	22.3398	13.2003	5.7559	11.1877	11.7134	11.5388	13.76533333	11.47996667	-0.261921093	0.599985392	1	no	cyp26a1	PREDICTED: cytochrome P450 26A1 [Cyprinus carpio]	ko01100//Metabolic pathways//Global and Overview//Metabolism;ko00830//Retinol metabolism//Metabolism of cofactors and vitamins//Metabolism	GO:0042175//nuclear outer membrane-endoplasmic reticulum membrane network;GO:0044464//cell part;GO:0043229//intracellular organelle;GO:0043231//intracellular membrane-bounded organelle;GO:0012505//endomembrane system;GO:0043227//membrane-bounded organelle;GO:0005622//intracellular;GO:0005623//cell;GO:0044424//intracellular part;GO:0043226//organelle;GO:0016020//membrane	GO:0003824//catalytic activity;GO:0046872//metal ion binding;GO:0016491//oxidoreductase activity;GO:1901363//heterocyclic compound binding;GO:0043167//ion binding;GO:0004497//monooxygenase activity;GO:0046906//tetrapyrrole binding;GO:0043169//cation binding;GO:0005488//binding;GO:0097159//organic cyclic compound binding;GO:0046914//transition metal ion binding	GO:0006721//terpenoid metabolic process;GO:0007420//brain development;GO:0050794//regulation of cellular process;GO:0009987//cellular process;GO:0023052//signaling;GO:0010033//response to organic substance;GO:0060322//head development;GO:0050789//regulation of biological process;GO:0042221//response to chemical;GO:0044712//single-organism catabolic process;GO:0044248//cellular catabolic process;G…
Unigene0001424	16	20.33333333	0.5505	2.2628	0.0634	2.6228	0.2305	0.0954	0.9589	0.9829	0.035664275	1	1	no	WT1	PREDICTED: Wilms tumor protein homolog [Sinocyclocheilus rhinocerous]	-	-	-	-
Unigene0001425	954.3333333	851.6666667	20.6797	22.3886	28.6649	15.1319	14.7147	22.3301	23.91106667	17.39223333	-0.459235289	0.281344631	1	no	-	--	-	-	-	-
Unigene0001426	399.6666667	508.6666667	1.535	1.225	2.4784	0.9945	2.0202	2.479	1.746133333	1.831233333	0.068651903	0.891282539	1	no	SEMA5B	PREDICTED: semaphorin-5B [Sinocyclocheilus rhinocerous]	-	-	-	-
Unigene0001427	6	11.66666667	0.1981	0.3858	0.6161	0.3604	0.2488	1.2364	0.4	0.6152	0.621055503	0.505219987	1	no	-	PREDICTED: uncharacterized protein LOC109204176 [Oreochromis niloticus]	-	-	-	-
Unigene0001428	36.66666667	58	1.4229	1.6056	0.5028	1.9665	1.4925	1.1855	1.1771	1.548166667	0.395323903	0.527424948	1	no	-	--	-	-	-	-
Unigene0001429	449.3333333	1210	0.9798	8.4456	0.5234	19.8847	0.6957	0.8701	3.316266667	7.150166667	1.10841685	0.312002436	1	no	CDH26	PREDICTED: B-cadherin-like [Sinocyclocheilus anshuiensis]	-	-	-	-
Unigene0001430	1576.666667	1453	15.0646	17.9393	18.4581	12.1253	13.7811	13.3326	17.154	13.07966667	-0.391219251	0.323591343	1	no	U2AF1	PREDICTED: splicing factor U2AF 35 kDa subunit-like isoform X1 [Cyprinus carpio]	ko03040//Spliceosome//Transcription//Genetic Information Processing	-	-	-
Unigene0001431	93.33333333	156.3333333	0.9622	4.9548	1.076	6.0603	1.8841	1.6393	2.331	3.194566667	0.454671243	0.531122143	1	no	-	--	-	-	-	-
Unigene0001432	0.333333333	0.666666667	0	0.107	0	0	0.207	0	0.035666667	0.069	0.952019971	1	1	no	-	--	-	-	-	-
Unigene0001433	315.3333333	609.6666667	1.9942	1.5394	2.0792	3.6753	2.2674	2.8625	1.870933333	2.935066667	0.649635121	0.142377143	1	no	ABCB1	PREDICTED: multidrug resistance protein 1-like isoform X1 [Sinocyclocheilus grahami]	ko02010//ABC transporters//Membrane transport//Environmental Information Processing	GO:0016020//membrane;GO:0044425//membrane part;GO:0031224//intrinsic component of membrane	GO:0001883//purine nucleoside binding;GO:0022857//transmembrane transporter activity;GO:0016462//pyrophosphatase activity;GO:0001882//nucleoside binding;GO:0003824//catalytic activity;GO:0097367//carbohydrate derivative binding;GO:1901363//heterocyclic compound binding;GO:0022804//active transmembrane transporter activity;GO:0005488//binding;GO:0005215//transporter activity;GO:0015399//primary ac…	GO:0051234//establishment of localization;GO:0044763//single-organism cellular process;GO:0051179//localization;GO:0009987//cellular process;GO:0044699//single-organism process
Unigene0001434	17.66666667	13	0.7188	1.2919	0.9169	0.6035	0.625	0.5607	0.975866667	0.5964	-0.710403787	0.274169004	1	no	-	--	-	-	-	-
Unigene0001435	92.33333333	119	1.5678	1.4374	1.2148	1.8513	1.5054	1.1398	1.406666667	1.498833333	0.09155947	0.860609519	1	no	Tdg	PREDICTED: G/T mismatch-specific thymine DNA glycosylase-like [Sinocyclocheilus grahami]	ko03410//Base excision repair//Replication and repair//Genetic Information Processing	-	-	-
Unigene0001436	156.3333333	200.3333333	4.1087	4.6044	5.2084	4.7473	5.8748	4.2424	4.6405	4.954833333	0.09455627	0.843699049	1	no	-	--	-	-	-	-
Unigene0001437	12.33333333	11.66666667	0.8118	1.0867	1.8932	0.7911	0.3823	1.6622	1.2639	0.9452	-0.419190787	0.63093508	1	no	-	--	-	-	-	-
Unigene0001438	41	60.66666667	1.8199	3.0307	0.9928	3.1365	2.5263	1.569	1.9478	2.4106	0.30754673	0.625959661	1	no	-	--	-	-	-	-
Unigene0001439	88.33333333	72.66666667	0.9818	0.4324	1.7324	0.6925	0.2862	1.0576	1.048866667	0.678766667	-0.627843669	0.337442945	1	no	-	--	-	-	-	-
Unigene0001440	5.333333333	8	0.9196	0.1791	0.3813	0.5019	0.4331	0.8608	0.493333333	0.5986	0.279029509	0.862004731	1	no	-	Transposable element Tcb2 transposase [Larimichthys crocea]	-	-	-	-
Unigene0001441	144.6666667	214	3.0916	2.0066	10.1117	4.419	5.9212	7.8776	5.069966667	6.0726	0.26033808	0.672167654	1	no	-	PREDICTED: sterile alpha motif domain-containing protein 3-like isoform X1 [Oreochromis niloticus]	-	-	-	-
Unigene0001442	141	52.33333333	12.8181	3.2231	20.5004	1.8531	1.7591	7.0849	12.18053333	3.5657	-1.772320072	0.017048203	1	no	-	--	-	-	-	-
Unigene0001443	0.333333333	0.666666667	0	0.0886	0	0	0.1715	0	0.029533333	0.057166667	0.952829973	1	1	no	-	--	-	-	-	-
Unigene0001444	15.66666667	23	1.6149	0.6289	0.8034	1.5612	1.2169	0.907	1.015733333	1.228366667	0.274219576	0.697926817	1	no	-	--	-	-	-	-
Unigene0001445	680.6666667	1243.333333	4.9999	4.5946	2.554	5.1773	7.6656	5.8314	4.0495	6.224766667	0.620275973	0.162546969	1	no	Pik3c2g	PREDICTED: phosphatidylinositol 4-phosphate 3-kinase C2 domain-containing subunit gamma-like isoform X2 [Cyprinus carpio]	ko01100//Metabolic pathways//Global and Overview//Metabolism;ko04070//Phosphatidylinositol signaling system//Signal transduction//Environmental Information Processing;ko00562//Inositol phosphate metabolism//Carbohydrate metabolism//Metabolism	-	GO:0003824//catalytic activity;GO:0043167//ion binding;GO:0016740//transferase activity;GO:0005488//binding;GO:0043168//anion binding;GO:0016772//transferase activity, transferring phosphorus-containing groups	GO:0009987//cellular process;GO:0006793//phosphorus metabolic process;GO:0044699//single-organism process;GO:0044763//single-organism cellular process;GO:0006796//phosphate-containing compound metabolic process;GO:0008152//metabolic process;GO:0044237//cellular metabolic process
Unigene0001446	271	411	3.0804	2.5867	2.9733	4.275	3.6692	2.8651	2.880133333	3.6031	0.323103091	0.466082164	1	no	-	--	-	-	-	-
Unigene0001447	15.66666667	16	1.1804	0.7901	1.5293	1.4379	0.7644	0.6905	1.1666	0.964266667	-0.274805897	0.712002162	1	no	-	--	-	-	-	-
Unigene0001448	10	16.66666667	0.8871	0.2467	0.7881	0.7904	0.5968	1.1861	0.640633333	0.857766667	0.421086387	0.567461571	1	no	pol	PREDICTED: LOW QUALITY PROTEIN: ankyrin-2-like [Cyprinus carpio]	-	-	-	-
Unigene0001449	206	311.3333333	2.1353	0.9536	0.9543	1.3287	1.9989	1.7725	1.347733333	1.700033333	0.335027966	0.50771258	1	no	MYH4	myosin heavy chain b [Culter alburnus]	ko04530//Tight junction//Cellular commiunity//Cellular Processes	GO:0043229//intracellular organelle;GO:0043228//non-membrane-bounded organelle;GO:0015629//actin cytoskeleton;GO:0005623//cell;GO:0005622//intracellular;GO:0044424//intracellular part;GO:0043232//intracellular non-membrane-bounded organelle;GO:0043226//organelle;GO:0044464//cell part;GO:0005856//cytoskeleton	GO:0001882//nucleoside binding;GO:0017111//nucleoside-triphosphatase activity;GO:0016818//hydrolase activity, acting on acid anhydrides, in phosphorus-containing anhydrides;GO:0016787//hydrolase activity;GO:0016817//hydrolase activity, acting on acid anhydrides;GO:0005488//binding;GO:0005515//protein binding;GO:0016462//pyrophosphatase activity;GO:0032550//purine ribonucleoside binding;GO:0001883…	-
Unigene0001450	72.33333333	146	1.8592	2.9531	2.2651	4.1195	4.5777	3.2311	2.359133333	3.9761	0.753097083	0.136362588	1	no	-	--	-	-	-	-
Unigene0001451	2.333333333	2.666666667	0.3784	0.0921	0.1961	0	0.1782	0.4427	0.2222	0.206966667	-0.102460386	1	1	no	-	PREDICTED: chromobox protein homolog 7-like [Sinocyclocheilus anshuiensis]	-	-	-	-
Unigene0001452	63	71.33333333	2.1877	3.2271	0.7902	2.8686	1.686	1.2669	2.068333333	1.9405	-0.092040277	0.887831249	1	no	-	--	-	-	-	-
Unigene0001453	12.66666667	22.66666667	1.1711	0.9647	1.3072	1.6154	2.2062	1.3351	1.147666667	1.7189	0.582781936	0.369921377	1	no	-	--	-	-	-	-
Unigene0001454	4.666666667	5.666666667	0.373	0.3632	1.031	0.8725	0	0.7759	0.589066667	0.549466667	-0.100398955	1	1	no	-	--	-	-	-	-
Unigene0001455	952.6666667	1603	12.8621	16.7051	10.6154	14.1245	24.018	18.8236	13.3942	18.9887	0.503532724	0.238434328	1	no	Fbxl3	PREDICTED: F-box/LRR-repeat protein 3-like [Lates calcarifer]	-	-	-	-
Unigene0001456	29.66666667	47	1.1351	1.0437	0.6209	0.8849	1.3958	1.4264	0.933233333	1.2357	0.405018788	0.483006105	1	no	-	--	-	-	-	-
Unigene0001457	12.66666667	17.66666667	0.7737	0.7533	0.7403	0.8816	0.7848	0.9285	0.755766667	0.864966667	0.194703647	0.795071682	1	no	-	--	-	-	-	-
Unigene0001458	21.33333333	8.666666667	1.404	1.0562	1.6537	0.0995	0.1803	1.0454	1.3713	0.441733333	-1.634296617	0.05764018	1	no	-	--	-	-	-	-
Unigene0001459	39.33333333	55.66666667	3.4683	2.5171	1.4379	3.9331	2.5541	2.1642	2.474433333	2.8838	0.22087294	0.71914184	1	no	-	--	-	-	-	-
Unigene0001460	8201.333333	7901.666667	91.614	71.97	100.6542	47.0981	76.2282	87.1397	88.0794	70.15533333	-0.328251857	0.410482452	1	no	trip13	PREDICTED: pachytene checkpoint protein 2 homolog isoform X1 [Sinocyclocheilus anshuiensis]	-	-	GO:0003824//catalytic activity;GO:1901363//heterocyclic compound binding;GO:0036094//small molecule binding;GO:0001883//purine nucleoside binding;GO:0016817//hydrolase activity, acting on acid anhydrides;GO:0032550//purine ribonucleoside binding;GO:0097159//organic cyclic compound binding;GO:0005488//binding;GO:0097367//carbohydrate derivative binding;GO:0016787//hydrolase activity;GO:0016818//hy…	GO:0070192//chromosome organization involved in meiotic cell cycle;GO:0032502//developmental process;GO:0048609//multicellular organismal reproductive process;GO:0044703//multi-organism reproductive process;GO:0000003//reproduction;GO:0044260//cellular macromolecule metabolic process;GO:0022414//reproductive process;GO:0050896//response to stimulus;GO:0006950//response to stress;GO:0006281//DNA r…
Unigene0001461	7.666666667	9.333333333	0	0.5804	1.4123	0.7303	0.4011	0.7971	0.664233333	0.642833333	-0.047245384	1	1	no	-	--	-	-	-	-
Unigene0001462	512	588.6666667	10.5461	12.6006	7.4528	8.9851	11.4575	9.0362	10.19983333	9.826266667	-0.053830282	0.902764585	1	no	si:dkey-184p18.2	PREDICTED: UPF0711 protein C18orf21 homolog isoform X3 [Sinocyclocheilus anshuiensis]	-	-	-	-
Unigene0001463	27.66666667	40.66666667	1.6614	2.9495	3.5454	3.5811	3.6822	2.6681	2.718766667	3.310466667	0.284082264	0.636053855	1	no	-	--	-	-	-	-
Unigene0001464	1033	1405	11.2454	17.0122	8.4152	11.9184	16.37	13.6025	12.22426667	13.96363333	0.191926459	0.658903562	1	no	tmeff1	PREDICTED: tomoregulin-1-like [Sinocyclocheilus rhinocerous]	-	-	-	-
Unigene0001465	399	306.3333333	0.8884	1.8714	3.3137	1.0604	1.7539	1.0844	2.0245	1.299566667	-0.639534998	0.230217019	1	no	Col11a1	PREDICTED: collagen alpha-1(XI) chain-like [Sinocyclocheilus anshuiensis]	-	-	GO:0005198//structural molecule activity	-
Unigene0001466	39.33333333	37.66666667	4.0441	3.3968	1.8903	3.7093	1.942	1.67	3.1104	2.440433333	-0.349962783	0.569068099	1	no	ZNF879	PREDICTED: zinc finger protein 664-like [Sinocyclocheilus rhinocerous]	-	-	-	-
Unigene0001467	208.6666667	383.3333333	1.7932	2.0025	1.7128	3.036	3.6762	1.8033	1.836166667	2.8385	0.628431725	0.181958414	1	no	LOXL1	PREDICTED: lysyl oxidase homolog 1-like [Sinocyclocheilus grahami]	-	-	GO:0016491//oxidoreductase activity;GO:0016638//oxidoreductase activity, acting on the CH-NH2 group of donors;GO:0003824//catalytic activity	GO:0032501//multicellular organismal process;GO:0048731//system development;GO:0032502//developmental process;GO:0044710//single-organism metabolic process;GO:0007275//multicellular organism development;GO:0008152//metabolic process;GO:0048568//embryonic organ development;GO:0048513//animal organ development;GO:0044707//single-multicellular organism process;GO:0044699//single-organism process;GO:…
Unigene0001468	101.3333333	138.3333333	2.7368	2.9867	0.9379	2.9596	3.3678	1.3945	2.220466667	2.573966667	0.213130457	0.722597788	1	no	Eva1b	PREDICTED: protein eva-1 homolog B isoform X1 [Larimichthys crocea]	-	-	-	-
Unigene0001469	154.6666667	222	3.2711	3.1407	4.1153	2.9196	4.9724	4.6808	3.509033333	4.190933333	0.25619792	0.59316816	1	no	-	--	-	-	-	-
Unigene0001470	190.6666667	155	2.0649	1.0489	3.3965	1.1462	1.2579	1.882	2.1701	1.4287	-0.603058515	0.267109499	1	no	-	PREDICTED: acidic leucine-rich nuclear phosphoprotein 32 family member B-like isoform X1 [Salmo salar]	-	-	GO:0003824//catalytic activity;GO:0097159//organic cyclic compound binding;GO:0003676//nucleic acid binding;GO:1901363//heterocyclic compound binding;GO:0005488//binding	GO:0090304//nucleic acid metabolic process;GO:0006807//nitrogen compound metabolic process;GO:0044237//cellular metabolic process;GO:0006725//cellular aromatic compound metabolic process;GO:0034641//cellular nitrogen compound metabolic process;GO:0044260//cellular macromolecule metabolic process;GO:0009987//cellular process;GO:0044238//primary metabolic process;GO:1901360//organic cyclic compound…
Unigene0001471	16.33333333	33	0.8623	0.7595	0.383	1.2485	1.083	1.0249	0.668266667	1.1188	0.74345634	0.236701251	1	no	-	--	-	-	-	-
Unigene0001472	0	0	0	0	0	0	0	0	0.001	0.001	0	notest	notest	notest	-	--	-	-	-	-
Unigene0001473	61.33333333	66	1.7624	2.1749	0.5917	2.5932	0.7949	0.5808	1.509666667	1.322966667	-0.190453327	0.788205092	1	no	-	--	-	-	-	-
Unigene0001474	96.66666667	64.66666667	1.9814	1.3932	3.0806	0.6522	0.4355	2.3183	2.151733333	1.135333333	-0.92238336	0.17085011	1	no	-	--	-	-	-	-
Unigene0001475	98.33333333	93.66666667	5.7921	2.9559	5.132	3.314	3.4318	4.0807	4.626666667	3.608833333	-0.358440645	0.494800367	1	no	-	--	-	-	-	-
Unigene0001476	7	15.66666667	0.8524	0.1185	0.3155	1.424	0.5161	0.3799	0.4288	0.773333333	0.850785494	0.33838891	1	no	-	--	-	-	-	-
Unigene0001477	54	116	2.775	1.7084	2.1572	6.2359	2.7292	2.5784	2.213533333	3.847833333	0.797695212	0.158139795	1	no	-	--	-	-	-	-
Unigene0001478	62.66666667	76.33333333	1.0437	0.6986	1.3523	1.0045	0.5223	1.4756	1.031533333	1.0008	-0.043636747	0.950926485	1	no	-	--	-	-	-	-
Unigene0001479	5	6.333333333	0.7025	0.1368	0.2184	0.3286	0.5955	0.2192	0.352566667	0.3811	0.112273526	1	1	no	-	--	-	-	-	-
Unigene0001480	455.6666667	645.3333333	7.2693	8.3937	3.4898	9.5994	7.1125	5.78	6.384266667	7.4973	0.231850219	0.62625839	1	no	gulp1	PTB domain-containing engulfment adapter protein 1 [Danio rerio]	-	-	-	GO:0051179//localization;GO:0009987//cellular process;GO:0016192//vesicle-mediated transport;GO:0016265//death;GO:0044763//single-organism cellular process;GO:0006897//endocytosis;GO:0008219//cell death;GO:0012501//programmed cell death;GO:0044699//single-organism process;GO:0006810//transport;GO:0051234//establishment of localization
Unigene0001481	20.33333333	13.66666667	2.218	0.254	1.5551	0.712	0.4301	1.0177	1.342366667	0.719933333	-0.898843574	0.268599568	1	no	-	--	-	-	-	-
[truncated: 71,968 more rows]
