# Supplementary material for: Comparative Analysis of miRNA-mRNA Regulation in the Testes of Gobiocypris rarus following 17α-Methyltestosterone Exposure
Source: Int J Mol Sci. 2023 Feb 20;24(4):4239. doi: 10.3390/ijms24044239 (PMC9968023; doi:10.3390/ijms24044239)
Supplement: Supplementary file 1 [file ijms-24-04239-s001.zip › Table S3-MT25-M-VS-MT50-M.annot.xls]

GeneID	MT25-M_count	MT50-M_count	MT25-M1_rpkm	MT25-M2_rpkm	MT25-M3_rpkm	MT50-M1_rpkm	MT50-M2_rpkm	MT50-M3_rpkm	MT25-M_rpkm	MT50-M_rpkm	log2 Ratio(MT50-M/MT25-M)	Pvalue	FDR	significant	Symbol	Description	Pathway	GO Component	GO Function	GO Process
Unigene0000001	6.66666666666667	12	0.8498	0.4388	0.4125	0.2566	1.9660	0.2641	0.567033333333333	0.8289	0.547764515673764	0.596033496259562	1	no	Npr1	PREDICTED: atrial natriuretic peptide receptor 1-like [Cyprinus carpio]	ko04270//Vascular smooth muscle contraction//Circulatory system//Organismal Systems;ko00230//Purine metabolism//Nucleotide metabolism//Metabolism	GO:0031224//intrinsic component of membrane;GO:0016020//membrane;GO:0044425//membrane part	GO:0005488//binding;GO:0016772//transferase activity, transferring phosphorus-containing groups;GO:0036094//small molecule binding;GO:0001883//purine nucleoside binding;GO:0009975//cyclase activity;GO:0016301//kinase activity;GO:1901363//heterocyclic compound binding;GO:0016740//transferase activity;GO:0016829//lyase activity;GO:0032549//ribonucleoside binding;GO:0003824//catalytic activity;GO:00…	GO:0009152//purine ribonucleotide biosynthetic process;GO:1901135//carbohydrate derivative metabolic process;GO:0006164//purine nucleotide biosynthetic process;GO:0006753//nucleoside phosphate metabolic process;GO:1901566//organonitrogen compound biosynthetic process;GO:0044711//single-organism biosynthetic process;GO:1901293//nucleoside phosphate biosynthetic process;GO:0044237//cellular metabol…
Unigene0000002	21.3333333333333	19.3333333333333	1.3184	1.2254	0.8727	0.7330	0.7576	0.9638	1.13883333333333	0.818133333333333	-0.477148738859063	0.412601240328134	1	no	-	--	-	-	-	-
Unigene0000003	12	16.6666666666667	1.0852	0.6207	0.9118	0.6239	0.9312	1.4009	0.872566666666667	0.985333333333333	0.175346501961109	0.825103541023886	1	no	Gpr64	PREDICTED: cell wall protein DAN4-like [Sinocyclocheilus anshuiensis]	-	-	-	-
Unigene0000004	1820.66666666667	2136.33333333333	14.9090	15.9482	17.6854	14.8766	15.4378	16.4127	16.1808666666667	15.5757	-0.0549918802989613	0.857308433729135	1	no	PDLIM5	PDZ and LIM domain 5 isoform 2 [Danio rerio]	-	-	GO:0043169//cation binding;GO:0005488//binding;GO:0043167//ion binding	-
Unigene0000005	16	23	0.3778	0.6522	1.1005	1.0269	1.2443	0.3774	0.710166666666667	0.882866666666667	0.314037928246427	0.661290536035263	1	no	ZCCHC24	Zinc finger CCHC domain-containing protein 24 [Dicentrarchus labrax]	-	-	GO:0003723//RNA binding;GO:0005488//binding;GO:0097159//organic cyclic compound binding;GO:0003676//nucleic acid binding;GO:1901363//heterocyclic compound binding;GO:0046872//metal ion binding;GO:0043169//cation binding;GO:0043167//ion binding	-
Unigene0000006	5118.66666666667	4661	23.2279	16.5443	18.1072	15.1414	6.8929	19.8930	19.2931333333333	13.9757666666667	-0.465160038739095	0.224653280359575	0.942682990906064	no	EML6	PREDICTED: echinoderm microtubule-associated protein-like 6 isoform X3 [Sinocyclocheilus grahami]	-	-	-	-
Unigene0000007	45.6666666666667	4.66666666666667	1.6665	3.0979	0.1379	0.1544	0.0563	0.1589	1.6341	0.1232	-3.7294221118667	7.91359977521231e-05	0.0262120828353482	yes	-	--	-	-	-	-
Unigene0000008	67	73.3333333333333	1.2523	1.0945	0.9663	1.3844	0.6950	0.7972	1.10436666666667	0.958866666666667	-0.203817125366655	0.671569095302727	1	no	-	PREDICTED: tripartite motif-containing protein 35-like [Sinocyclocheilus grahami]	-	-	-	-
Unigene0000009	87	79.6666666666667	0.9872	1.4418	1.9804	1.1088	1.4532	0.8593	1.4698	1.14043333333333	-0.366037743626622	0.436307505953512	1	no	-	--	-	-	-	-
Unigene0000010	11.6666666666667	9.66666666666667	1.8723	0.3481	0.7498	0.1272	0.6266	1.1783	0.990066666666667	0.644033333333333	-0.620390313038745	0.494748687268685	1	no	-	TCR beta variable region, partial [Ictalurus punctatus]	-	-	-	-
Unigene0000011	445.666666666667	475	8.2751	8.3017	6.8368	6.4473	8.2102	5.4663	7.80453333333333	6.70793333333333	-0.218444019054597	0.538816087210483	1	no	-	--	-	-	-	-
Unigene0000012	25.3333333333333	27.3333333333333	1.1862	0.6891	2.6993	1.2594	2.1503	0.9331	1.52486666666667	1.4476	-0.0750200870665842	0.904483086332766	1	no	-	--	-	-	-	-
Unigene0000013	19.6666666666667	21.6666666666667	0.8785	0.5444	1.0307	0.4975	0.5444	1.1945	0.817866666666667	0.745466666666667	-0.133721821637757	0.842906656648828	1	no	-	PREDICTED: disks large homolog 5-like [Sinocyclocheilus grahami]	-	-	-	-
Unigene0000014	26	16.3333333333333	2.1640	1.2643	0.9454	0.9243	0.8276	0.3891	1.4579	0.713666666666667	-1.03056947099192	0.0989106285738907	0.820931555832196	no	-	--	-	-	-	-
Unigene0000015	353.333333333333	101.666666666667	12.2492	11.2406	2.3054	1.9750	2.8370	0.8347	8.5984	1.88223333333333	-2.19162274187404	0.0003424336517705	0.0703676902713323	no	Samsn1	PREDICTED: SAM domain-containing protein SAMSN-1-like isoform X3 [Sinocyclocheilus anshuiensis]	-	-	-	-
Unigene0000016	323	498.333333333333	3.7387	2.0583	2.4292	3.7389	4.1064	2.3126	2.74206666666667	3.38596666666667	0.304304123456931	0.442839914361614	1	no	C3orf58	PREDICTED: deleted in autism protein 1 homolog [Sinocyclocheilus anshuiensis]	-	-	-	-
Unigene0000017	110.333333333333	107.666666666667	4.1035	3.8141	4.7743	2.4852	4.8428	2.9628	4.23063333333333	3.43026666666667	-0.302552918607849	0.500513918130052	1	no	-	--	-	-	-	-
Unigene0000018	448	461	4.9392	5.7015	4.9307	3.7891	5.7071	3.5743	5.19046666666667	4.35683333333333	-0.252584329516957	0.484653884575787	1	no	GATSL3	GATS-like protein 3 [Danio rerio]	-	-	-	-
Unigene0000019	2.33333333333333	10.3333333333333	0.2260	0.2800	0.0000	0.2047	0.8402	0.6320	0.168666666666667	0.558966666666667	1.72858736797816	0.0997396743345799	0.821825088680301	no	-	pol-like protein [Tetraodon nigroviridis]	ko04080//Neuroactive ligand-receptor interaction//Signaling molecules and interaction//Environmental Information Processing	-	-	-
Unigene0000020	27.3333333333333	31	1.3156	1.3393	1.7335	1.3196	1.4908	1.3141	1.4628	1.37483333333333	-0.0894757958799607	0.867694630675988	1	no	-	--	-	-	-	-
Unigene0000021	6	20.3333333333333	0.0000	0.5924	0.7292	0.6805	2.3697	0.9549	0.440533333333333	1.33503333333333	1.59955267266236	0.0736673707099214	0.779629631500452	no	-	--	-	-	-	-
Unigene0000022	1673.66666666667	1571.33333333333	9.9549	8.8789	9.1411	5.6447	6.0402	9.5592	9.32496666666667	7.08136666666667	-0.397070748507617	0.237506261705935	0.949329510768927	no	fgfr1a	PREDICTED: LOW QUALITY PROTEIN: fibroblast growth factor receptor 1-A-like [Cyprinus carpio]	ko04010//MAPK signaling pathway//Signal transduction//Environmental Information Processing;ko04810//Regulation of actin cytoskeleton//Cell motility//Cellular Processes;ko04520//Adherens junction//Cellular commiunity//Cellular Processes	GO:0043226//organelle;GO:0043227//membrane-bounded organelle;GO:0044425//membrane part;GO:0005622//intracellular;GO:0005623//cell;GO:0044424//intracellular part;GO:0016020//membrane;GO:0043229//intracellular organelle;GO:0044444//cytoplasmic part;GO:0005737//cytoplasm;GO:0043231//intracellular membrane-bounded organelle;GO:0031982//vesicle;GO:0044464//cell part;GO:0031224//intrinsic component of …	GO:0001883//purine nucleoside binding;GO:0004888//transmembrane signaling receptor activity;GO:0019199//transmembrane receptor protein kinase activity;GO:0032549//ribonucleoside binding;GO:0019838//growth factor binding;GO:0097367//carbohydrate derivative binding;GO:0004714//transmembrane receptor protein tyrosine kinase activity;GO:0016772//transferase activity, transferring phosphorus-containin…	GO:0048646//anatomical structure formation involved in morphogenesis;GO:0009653//anatomical structure morphogenesis;GO:0050790//regulation of catalytic activity;GO:0048736//appendage development;GO:0050789//regulation of biological process;GO:0065009//regulation of molecular function;GO:0009888//tissue development;GO:0045859//regulation of protein kinase activity;GO:0043405//regulation of MAP kin…
Unigene0000023	11.6666666666667	6.33333333333333	0.6498	1.1217	1.0139	0.1262	0.8284	0.3245	0.928466666666667	0.426366666666667	-1.12275546354378	0.149794848765936	0.884700566811847	no	-	--	-	-	-	-
Unigene0000024	1331.66666666667	1460	4.5384	7.6409	5.7118	5.5682	6.7040	3.7611	5.9637	5.34443333333333	-0.158170697551747	0.658949822285257	1	no	myo1c	PREDICTED: unconventional myosin-Ic-like [Cyprinus carpio]	-	-	-	-
Unigene0000025	407.666666666667	322.666666666667	5.2132	2.4905	4.2369	1.8130	2.5512	3.3238	3.9802	2.56266666666667	-0.635195090795173	0.12201229756471	0.855135270825746	no	-	--	-	-	-	-
Unigene0000026	3306.33333333333	3762	19.4451	22.8116	23.4160	20.7499	21.5567	18.9588	21.8909	20.4218	-0.100221236667816	0.737590394682215	1	no	Uso1	PREDICTED: general vesicular transport factor p115 isoform X3 [Sinocyclocheilus anshuiensis]	-	GO:0012505//endomembrane system;GO:0044424//intracellular part;GO:0044422//organelle part;GO:0005623//cell;GO:0044464//cell part;GO:0044446//intracellular organelle part;GO:0005794//Golgi apparatus;GO:0043226//organelle;GO:0043229//intracellular organelle;GO:0044444//cytoplasmic part;GO:0043227//membrane-bounded organelle;GO:0043231//intracellular membrane-bounded organelle;GO:0005737//cytoplasm;…	-	GO:0061024//membrane organization;GO:1902589//single-organism organelle organization;GO:0016050//vesicle organization;GO:0046907//intracellular transport;GO:0044801//single-organism membrane fusion;GO:0048193//Golgi vesicle transport;GO:0044765//single-organism transport;GO:0071840//cellular component organization or biogenesis;GO:0016043//cellular component organization;GO:0051649//establishment…
Unigene0000027	22	18	0.9206	1.7826	1.6199	0.9904	0.9128	1.0192	1.44103333333333	0.974133333333333	-0.564912549578425	0.316269427462125	0.983201741162226	no	-	--	-	-	-	-
Unigene0000028	20.6666666666667	18.3333333333333	0.3402	1.7615	0.5661	0.7264	0.5782	0.5776	0.889266666666667	0.6274	-0.503230579399421	0.482463462097237	1	no	-	--	-	-	-	-
Unigene0000029	48	37.3333333333333	1.0057	1.0015	0.9939	0.5857	0.6054	0.7032	1.00036666666667	0.631433333333333	-0.663826563653023	0.16267970158413	0.898730181562041	no	-	--	-	-	-	-
Unigene0000030	8.66666666666667	10	0.0789	0.3667	1.1491	0.8042	0.1760	0.6621	0.531566666666667	0.547433333333333	0.0424326440537888	1	1	no	-	--	-	-	-	-
Unigene0000031	531.333333333333	708.666666666667	12.4163	7.5022	6.1818	10.5982	3.3122	13.0036	8.7001	8.97133333333333	0.0442904330637057	0.926582733296148	1	no	-	PREDICTED: leucine-rich repeat and IQ domain-containing protein 3 isoform X1 [Danio rerio]	-	-	-	-
Unigene0000032	12	12	0.7612	0.4354	0.6395	0.4376	0.7402	0.3275	0.612033333333333	0.501766666666667	-0.286593596040029	0.70873201285062	1	no	pol	PREDICTED: RNA-directed DNA polymerase from mobile element jockey-like [Poecilia formosa]	-	-	-	-
Unigene0000033	859	614.666666666667	7.4591	10.8998	9.5141	4.6856	6.5708	5.1368	9.291	5.4644	-0.765770789400298	0.0282428068386882	0.599913606228873	no	MKX	PREDICTED: homeobox protein Mohawk-like isoform X2 [Sinocyclocheilus rhinocerous]	-	GO:0043231//intracellular membrane-bounded organelle;GO:0043227//membrane-bounded organelle;GO:0005622//intracellular;GO:0005623//cell;GO:0043229//intracellular organelle;GO:0044424//intracellular part;GO:0044464//cell part;GO:0043226//organelle	GO:0001071//nucleic acid binding transcription factor activity;GO:1901363//heterocyclic compound binding;GO:0003676//nucleic acid binding;GO:0005488//binding;GO:0097159//organic cyclic compound binding	GO:0071704//organic substance metabolic process;GO:0044707//single-multicellular organism process;GO:0032774//RNA biosynthetic process;GO:0009653//anatomical structure morphogenesis;GO:1901362//organic cyclic compound biosynthetic process;GO:1901360//organic cyclic compound metabolic process;GO:0044249//cellular biosynthetic process;GO:0044699//single-organism process;GO:0044237//cellular metabol…
Unigene0000034	62	58.3333333333333	2.2182	1.4771	1.7116	0.6299	1.2310	2.2455	1.8023	1.3688	-0.396927508524983	0.46587897825235	1	no	gag-pol	PREDICTED: RNA-directed DNA polymerase from mobile element jockey-like [Danio rerio]	-	-	-	-
Unigene0000035	14	10.6666666666667	2.2887	0.7658	0.5333	0.0622	0.6808	1.3443	1.19593333333333	0.695766666666667	-0.781461501546541	0.409580540937385	1	no	-	--	-	-	-	-
Unigene0000036	158.666666666667	173.333333333333	1.9736	2.4801	2.0924	1.9096	2.5244	1.4021	2.18203333333333	1.94536666666667	-0.165631037893809	0.692424797598755	1	no	LGI2	PREDICTED: leucine-rich repeat LGI family member 2-like [Cyprinus carpio]	-	-	-	-
Unigene0000037	16.6666666666667	11.6666666666667	0.2673	1.2421	2.0758	0.6659	0.9275	0.6229	1.19506666666667	0.738766666666667	-0.69390042289292	0.34677946923495	0.990056348136279	no	-	PREDICTED: junctional adhesion molecule C-like isoform X2 [Sinocyclocheilus rhinocerous]	-	-	-	-
Unigene0000038	14.6666666666667	12.6666666666667	1.2380	0.9737	1.3869	1.4883	0.7082	0.3329	1.19953333333333	0.843133333333333	-0.508640546135857	0.490523470967887	1	no	-	--	-	-	-	-
Unigene0000039	30	15	1.1934	3.3278	2.5402	0.1248	1.7067	1.1554	2.3538	0.995633333333333	-1.24130530426069	0.0961899147140524	0.818595204050378	no	-	--	-	-	-	-
Unigene0000040	29.6666666666667	32	1.0690	1.0351	1.2974	0.9080	0.9606	1.1524	1.13383333333333	1.007	-0.171144905043989	0.751799325340034	1	no	-	--	-	-	-	-
Unigene0000041	41.6666666666667	37	1.2165	1.1612	1.1970	0.6032	1.1002	0.8966	1.19156666666667	0.866666666666667	-0.459310548239236	0.358154553337351	0.994162578408029	no	-	--	-	-	-	-
Unigene0000042	1.66666666666667	0.666666666666667	0.1731	0.0804	0.1260	0.0000	0.1287	0.0000	0.1265	0.0429	-1.56008783208213	0.399276512272024	1	no	-	--	-	-	-	-
Unigene0000043	122	105.333333333333	1.8411	1.2796	2.0774	0.9467	1.4555	1.3222	1.7327	1.24146666666667	-0.480976361905148	0.26891177020898	0.967024046592093	no	Bscl2	PREDICTED: seipin-like isoform X2 [Sinocyclocheilus anshuiensis]	-	-	-	-
Unigene0000044	31.3333333333333	11	2.3347	1.9290	1.2278	0.8813	0.2894	0.3174	1.8305	0.496033333333333	-1.88372879586354	0.00348243615621114	0.249713873549859	no	-	--	-	-	-	-
Unigene0000045	14.3333333333333	1.33333333333333	1.3777	0.4980	1.0032	0.0520	0.1708	0.0000	0.959633333333333	0.0742666666666667	-3.69169653926301	8.55772466464235e-05	0.0278371654461207	yes	-	--	-	-	-	-
Unigene0000046	2094	2803.66666666667	62.1806	54.8346	66.7687	67.0711	57.5308	76.1755	61.2613	66.9258	0.127586497197344	0.678660672490627	1	no	POLR2F	PREDICTED: DNA-directed RNA polymerases I, II, and III subunit RPABC2 [Sinocyclocheilus rhinocerous]	ko01100//Metabolic pathways//Global and Overview//Metabolism;ko00230//Purine metabolism//Nucleotide metabolism//Metabolism;ko00240//Pyrimidine metabolism//Nucleotide metabolism//Metabolism;ko04623//Cytosolic DNA-sensing pathway//Immune system//Organismal Systems;ko03020//RNA polymerase//Transcription//Genetic Information Processing	GO:1990234//transferase complex;GO:0044446//intracellular organelle part;GO:0044464//cell part;GO:0070013//intracellular organelle lumen;GO:0044428//nuclear part;GO:0044424//intracellular part;GO:0061695//transferase complex, transferring phosphorus-containing groups;GO:0043234//protein complex;GO:0031974//membrane-enclosed lumen;GO:0044451//nucleoplasm part;GO:0044422//organelle part;GO:0005622/…	GO:0003676//nucleic acid binding;GO:0097159//organic cyclic compound binding;GO:0003899//DNA-directed RNA polymerase activity;GO:0034062//RNA polymerase activity;GO:0016772//transferase activity, transferring phosphorus-containing groups;GO:1901363//heterocyclic compound binding;GO:0016779//nucleotidyltransferase activity;GO:0016740//transferase activity;GO:0003824//catalytic activity;GO:0005488/…	GO:0071704//organic substance metabolic process;GO:0043170//macromolecule metabolic process;GO:0010467//gene expression;GO:0008152//metabolic process
Unigene0000047	2312	2669	16.6242	15.2663	17.9366	16.2741	15.1273	15.5898	16.6090333333333	15.6637333333333	-0.0845399999212613	0.778465271813168	1	no	fam91a1	protein FAM91A1 [Danio rerio]	-	-	-	-
Unigene0000048	698.666666666667	714.666666666667	6.4041	4.0429	6.2940	5.8606	4.3909	3.7143	5.58033333333333	4.65526666666667	-0.2614874902305	0.472905988146221	1	no	PTK2B	PREDICTED: protein-tyrosine kinase 2-beta-like [Sinocyclocheilus grahami]	ko04020//Calcium signaling pathway//Signal transduction//Environmental Information Processing;ko04912//GnRH signaling pathway//Endocrine system//Organismal Systems	GO:0043226//organelle;GO:0043229//intracellular organelle;GO:0044424//intracellular part;GO:0005924//cell-substrate adherens junction;GO:0044464//cell part;GO:0030054//cell junction;GO:0005622//intracellular;GO:0030055//cell-substrate junction;GO:0043228//non-membrane-bounded organelle;GO:0005623//cell;GO:0043232//intracellular non-membrane-bounded organelle;GO:0005912//adherens junction;GO:00701…	GO:0097159//organic cyclic compound binding;GO:0016740//transferase activity;GO:0016772//transferase activity, transferring phosphorus-containing groups;GO:0005488//binding;GO:1901363//heterocyclic compound binding;GO:0032549//ribonucleoside binding;GO:0001883//purine nucleoside binding;GO:0003824//catalytic activity;GO:0097367//carbohydrate derivative binding;GO:0016301//kinase activity;GO:00600…	GO:0050789//regulation of biological process;GO:0043170//macromolecule metabolic process;GO:0008152//metabolic process;GO:0044238//primary metabolic process;GO:0006796//phosphate-containing compound metabolic process;GO:0006464//cellular protein modification process;GO:0006793//phosphorus metabolic process;GO:0036211//protein modification process;GO:0065007//biological regulation;GO:0009966//regu…
Unigene0000049	287.666666666667	256.333333333333	4.2667	2.1880	2.8836	1.8828	3.6836	1.1916	3.11276666666667	2.25266666666667	-0.466563586499895	0.320337376994212	0.984480181773653	no	-	--	-	-	-	-
Unigene0000050	1705.66666666667	1255.66666666667	16.8800	18.5506	10.4138	9.5546	7.6924	9.2592	15.2814666666667	8.8354	-0.790415659635954	0.0214759445691481	0.545687203411162	no	Tank	PREDICTED: TRAF family member-associated NF-kappa-B activator-like isoform X1 [Sinocyclocheilus grahami]	ko04622//RIG-I-like receptor signaling pathway//Immune system//Organismal Systems	-	-	-
Unigene0000051	12	25.3333333333333	0.8398	0.7205	0.5174	0.6584	0.7206	2.0778	0.692566666666667	1.15226666666667	0.734449778120332	0.276891258124204	0.969893858014098	no	-	--	-	-	-	-
Unigene0000052	42.3333333333333	52.3333333333333	2.6579	3.3196	3.1450	2.7090	3.7061	2.8457	3.04083333333333	3.08693333333333	0.0217075811725186	1	1	no	Znf235	PREDICTED: zinc finger protein 501-like [Sinocyclocheilus rhinocerous]	-	-	-	-
Unigene0000053	128.333333333333	67	1.8218	1.6546	1.2759	0.6048	0.7239	0.6515	1.5841	0.660066666666667	-1.26297976277895	0.00327681742674139	0.239131850420919	no	SYNE1	PREDICTED: nesprin-1-like [Sinocyclocheilus grahami]	-	-	-	-
Unigene0000054	3788.66666666667	4461.33333333333	13.8347	14.0363	16.1051	15.3702	15.1586	11.9663	14.6587	14.1650333333333	-0.0494231677172431	0.869841978230771	1	no	-	Si:ch211-13c6.2 protein, partial [Danio rerio]	-	-	-	-
Unigene0000055	38	33.3333333333333	1.5830	1.1835	0.7768	0.7483	0.7934	0.8903	1.1811	0.810666666666667	-0.542950390270405	0.30953067638988	0.981537859477186	no	-	--	-	-	-	-
Unigene0000056	14	15.6666666666667	1.5980	0.1937	0.8094	0.5665	0.2067	1.5060	0.867033333333333	0.759733333333333	-0.190594338377634	0.875366570431034	1	no	-	--	-	-	-	-
Unigene0000057	298.666666666667	346	12.5096	12.5651	13.9573	14.5666	10.4658	11.7802	13.0106666666667	12.2708666666667	-0.0844577404030373	0.818278541816286	1	no	-	--	-	-	-	-
Unigene0000058	13.6666666666667	8.66666666666667	1.4648	0.8509	0.9999	0.3110	0.4766	0.8962	1.1052	0.561266666666667	-0.977549181209152	0.154176198647849	0.889828101430455	no	-	--	-	-	-	-
Unigene0000059	3860.66666666667	2649.66666666667	71.7234	49.1919	45.4405	33.2615	13.9200	42.4490	55.4519333333333	29.8768333333333	-0.892210516906229	0.0270004300833703	0.591292396241323	no	cfap97	PREDICTED: cilia- and flagella-associated protein 97-like [Sinocyclocheilus anshuiensis]	-	-	-	-
Unigene0000060	14.6666666666667	21	0.8259	0.5278	0.6390	0.5261	1.0365	0.7580	0.664233333333333	0.773533333333333	0.21977333840101	0.740861285225125	1	no	-	--	-	-	-	-
Unigene0000061	10	14.6666666666667	0.4974	0.6357	0.4980	0.4225	0.8785	0.6521	0.5437	0.651033333333333	0.259920584077568	0.701391040957524	1	no	-	--	-	-	-	-
Unigene0000062	11	18	0.0000	0.0000	1.6979	1.7765	0.8408	0.0494	0.565966666666667	0.8889	0.651304040837442	0.652802659162626	1	no	-	--	-	-	-	-
Unigene0000063	1286	1484	10.7207	12.3516	11.1456	9.9712	13.0729	9.1707	11.4059666666667	10.7382666666667	-0.0870275842826097	0.789045154713929	1	no	pi4k2a	phosphatidylinositol 4-kinase type 2-alpha [Danio rerio]	ko01100//Metabolic pathways//Global and Overview//Metabolism;ko04070//Phosphatidylinositol signaling system//Signal transduction//Environmental Information Processing;ko00562//Inositol phosphate metabolism//Carbohydrate metabolism//Metabolism	GO:0098590//plasma membrane region;GO:0005623//cell;GO:0043005//neuron projection;GO:0031082//BLOC complex;GO:0018995//host;GO:0031982//vesicle;GO:0043227//membrane-bounded organelle;GO:0044216//other organism cell;GO:0044424//intracellular part;GO:0044218//other organism cell membrane;GO:0044279//other organism membrane;GO:0044456//synapse part;GO:0044444//cytoplasmic part;GO:0097458//neuron par…	GO:0032403//protein complex binding;GO:0001883//purine nucleoside binding;GO:0003824//catalytic activity;GO:0032550//purine ribonucleoside binding;GO:0044877//macromolecular complex binding;GO:0016773//phosphotransferase activity, alcohol group as acceptor;GO:0036094//small molecule binding;GO:0016301//kinase activity;GO:0032549//ribonucleoside binding;GO:0005488//binding;GO:0097159//organic cycl…	GO:0006796//phosphate-containing compound metabolic process;GO:0044237//cellular metabolic process;GO:0009987//cellular process;GO:0008152//metabolic process;GO:0006793//phosphorus metabolic process
Unigene0000064	9.66666666666667	5.66666666666667	0.5523	0.2567	1.3406	0.6255	0.0000	0.4506	0.716533333333333	0.3587	-0.998256075334485	0.327565166061931	0.986420158823011	no	-	--	-	-	-	-
Unigene0000065	1165	1904.66666666667	18.8550	19.0367	23.7418	26.4064	33.1410	23.9065	20.5445	27.8179666666667	0.437264751559471	0.17856446508888	0.91374377098103	no	NSUN5	PREDICTED: probable 28S rRNA (cytosine-C(5))-methyltransferase isoform X3 [Sinocyclocheilus grahami]	-	-	GO:0003824//catalytic activity	GO:0008152//metabolic process
Unigene0000066	10.3333333333333	15.6666666666667	1.1451	0.2504	0.4905	1.0069	0.5510	0.6594	0.628666666666667	0.7391	0.233474303588474	0.743338585432859	1	no	-	--	-	-	-	-
Unigene0000067	11849.6666666667	17816.6666666667	108.5033	116.5108	142.3440	161.1971	148.3835	145.9767	122.4527	151.852433333333	0.310445442198671	0.294412585848237	0.977725172132931	no	PRKAR1A	cAMP-dependent protein kinase type I-alpha regulatory subunit [Danio rerio]	ko04910//Insulin signaling pathway//Endocrine system//Organismal Systems;ko04210//Apoptosis//Cell growth and death//Cellular Processes	GO:0044424//intracellular part;GO:0005623//cell;GO:0005622//intracellular;GO:0044464//cell part	GO:0019207//kinase regulator activity;GO:0030234//enzyme regulator activity;GO:0019887//protein kinase regulator activity;GO:0098772//molecular function regulator	GO:0001932//regulation of protein phosphorylation;GO:0031323//regulation of cellular metabolic process;GO:0032268//regulation of cellular protein metabolic process;GO:0019220//regulation of phosphate metabolic process;GO:0031399//regulation of protein modification process;GO:0042325//regulation of phosphorylation;GO:0065007//biological regulation;GO:0051246//regulation of protein metabolic proces…
Unigene0000068	25	23	1.4136	1.3139	2.2302	0.7470	1.9856	1.1531	1.65256666666667	1.29523333333333	-0.351496453533476	0.575319065198081	1	no	-	--	-	-	-	-
Unigene0000069	1.66666666666667	1.66666666666667	0.1731	0.1609	0.0630	0.0588	0.0000	0.2420	0.132333333333333	0.100266666666667	-0.400334440352674	0.817305966651999	1	no	-	PREDICTED: nicalin-1-like [Cyprinus carpio]	-	-	-	-
Unigene0000070	2	2	0.0000	0.4249	0.0000	0.0518	0.2833	0.0000	0.141633333333333	0.1117	-0.342531657108812	1	1	no	-	PREDICTED: uroplakin-3a-like [Cyprinus carpio]	-	-	-	-
Unigene0000071	58	68	1.7969	1.3143	1.3943	1.4211	1.4239	1.4006	1.50183333333333	1.4152	-0.0857187648277048	0.863843549667326	1	no	-	--	-	-	-	-
Unigene0000072	33.6666666666667	54.3333333333333	1.2746	1.3164	1.5125	1.5076	2.8086	1.1883	1.36783333333333	1.83483333333333	0.423756569569268	0.434460949803871	1	no	-	--	-	-	-	-
Unigene0000073	5	8	0.1687	0.2351	0.6140	0.9168	0.1254	0.3538	0.339266666666667	0.465333333333333	0.455844845119814	0.728338109011803	1	no	-	--	-	-	-	-
Unigene0000074	10.6666666666667	16.3333333333333	1.1651	1.5642	0.9426	0.7037	1.3478	2.4440	1.22396666666667	1.4985	0.291954815436545	0.700956172717515	1	no	-	PREDICTED: SLAM family member 9-like [Sinocyclocheilus rhinocerous]	-	-	-	-
Unigene0000075	6	7	0.4696	0.4988	0.1465	0.2735	0.3492	0.3753	0.371633333333333	0.332666666666667	-0.159802593978063	0.9237773132639	1	no	MOB3B	PREDICTED: MOB kinase activator 3B-like [Cyprinus carpio]	-	-	-	-
Unigene0000076	5.66666666666667	14	1.0269	0.0000	0.4079	1.0783	0.7637	0.9138	0.478266666666667	0.9186	0.941621538984575	0.26156230074024	0.961215692371791	no	-	--	-	-	-	-
Unigene0000077	81.3333333333333	122.666666666667	5.3120	8.1798	3.8102	6.1413	7.5469	6.9850	5.76733333333333	6.89106666666667	0.256822906715133	0.574398619646112	1	no	-	--	-	-	-	-
Unigene0000078	813.666666666667	1090.66666666667	12.5009	11.1064	12.8442	14.7036	14.6179	10.5735	12.1505	13.2983333333333	0.130229762769878	0.696381105230816	1	no	TRAM2	PREDICTED: translocating chain-associated membrane protein 2-like isoform X1 [Cyprinus carpio]	-	GO:0016020//membrane;GO:0044425//membrane part;GO:0031224//intrinsic component of membrane	-	-
Unigene0000079	16	16.3333333333333	1.0475	0.6196	2.0803	1.1647	0.9915	1.1320	1.24913333333333	1.09606666666667	-0.188591928603141	0.80636560861173	1	no	-	--	-	-	-	-
Unigene0000080	0.666666666666667	3	0.1582	0.0000	0.0000	0.0000	0.2941	0.2212	0.0527333333333333	0.171766666666667	1.70366299268024	0.443361178170205	1	no	-	PREDICTED: uncharacterized protein LOC107583085 [Sinocyclocheilus grahami]	-	-	-	-
Unigene0000081	399.333333333333	455.666666666667	33.6735	30.7206	28.9189	30.5475	23.9184	31.0002	31.1043333333333	28.4887	-0.126725795035036	0.718168884427658	1	no	-	--	-	-	-	-
Unigene0000082	7.66666666666667	21	0.1744	0.9727	0.5715	1.6592	1.4917	0.7318	0.572866666666667	1.29423333333333	1.17582644043768	0.0999854156119657	0.822513947677755	no	-	--	-	-	-	-
Unigene0000083	24.6666666666667	7.33333333333333	0.6408	5.3608	0.2666	0.0000	1.1574	0.3201	2.0894	0.4925	-2.08489308233763	0.0652266713320078	0.760746403775948	no	-	--	-	-	-	-
Unigene0000084	85.6666666666667	147.666666666667	1.2857	2.1016	1.5657	2.8016	1.8134	2.2785	1.651	2.29783333333333	0.476934039833196	0.274872167916131	0.968958031673082	no	-	--	-	-	-	-
Unigene0000085	8.66666666666667	8.66666666666667	0.2890	0.6268	1.1224	0.4582	0.4299	0.8757	0.6794	0.587933333333333	-0.208608643295215	0.815195624465594	1	no	-	--	-	-	-	-
Unigene0000086	12.6666666666667	17.3333333333333	0.5188	0.9645	0.6611	0.5729	0.5788	1.2244	0.7148	0.792033333333333	0.148021514136003	0.834856699164998	1	no	-	--	-	-	-	-
Unigene0000087	1.66666666666667	4.33333333333333	0.1726	0.1604	0.0628	0.2932	0.4493	0.0603	0.131933333333333	0.2676	1.02026900431511	0.425387660449696	1	no	-	--	-	-	-	-
Unigene0000088	16	14.3333333333333	0.5629	0.9810	1.2809	0.5737	0.8895	0.6888	0.9416	0.717333333333333	-0.392470648315614	0.557989561678489	1	no	-	--	-	-	-	-
Unigene0000089	14.6666666666667	17.6666666666667	0.6487	1.2058	0.4723	0.7613	0.3947	1.0308	0.7756	0.728933333333333	-0.0895259286283657	0.925559764896835	1	no	-	--	-	-	-	-
Unigene0000090	9.66666666666667	17.3333333333333	0.5260	0.4889	0.6224	0.7149	0.6846	1.0115	0.545766666666667	0.803666666666667	0.558312962079857	0.386180933858214	1	no	-	--	-	-	-	-
Unigene0000091	20	25	1.4227	1.0112	1.8281	0.9667	2.0538	1.4629	1.42066666666667	1.49446666666667	0.0730626263823535	0.938845316982474	1	no	-	--	-	-	-	-
Unigene0000092	297	332.666666666667	23.5806	17.1129	15.3658	17.3217	14.9557	17.5279	18.6864333333333	16.6017666666667	-0.170654455913737	0.650403980637531	1	no	-	--	-	-	-	-
Unigene0000093	35.3333333333333	18.3333333333333	3.2566	3.1159	2.5805	1.2365	1.5670	0.9376	2.98433333333333	1.24703333333333	-1.25890865648147	0.0184151211952908	0.513875815317618	no	-	--	-	-	-	-
Unigene0000094	37.3333333333333	60	4.1197	2.2975	2.6665	3.2347	4.4933	3.9688	3.0279	3.89893333333333	0.36476192735567	0.469899054824125	1	no	-	--	-	-	-	-
Unigene0000095	51.6666666666667	44.6666666666667	1.2051	1.6354	0.5616	0.5404	1.1471	0.6236	1.13403333333333	0.770366666666667	-0.557845861878779	0.326324051674803	0.986420158823011	no	tc1a	transposase [Rana pipiens]	-	-	-	-
Unigene0000096	16.3333333333333	13.6666666666667	1.0521	1.7928	0.9576	0.8936	1.1084	0.5517	1.2675	0.851233333333333	-0.574359195866735	0.376510099896712	1	no	-	--	-	-	-	-
Unigene0000097	497.666666666667	899	4.2056	9.7992	4.9186	5.5586	14.6308	7.6839	6.3078	9.2911	0.558712493881576	0.213882585578945	0.936114130499761	no	Rdh7	PREDICTED: retinol dehydrogenase 7-like [Cyprinus carpio]	-	-	GO:0016616//oxidoreductase activity, acting on the CH-OH group of donors, NAD or NADP as acceptor;GO:0016491//oxidoreductase activity;GO:0016614//oxidoreductase activity, acting on CH-OH group of donors;GO:0003824//catalytic activity	GO:0030154//cell differentiation;GO:0007275//multicellular organism development;GO:0071704//organic substance metabolic process;GO:0048762//mesenchymal cell differentiation;GO:0048729//tissue morphogenesis;GO:0002009//morphogenesis of an epithelium;GO:0003008//system process;GO:0014031//mesenchymal cell development;GO:0007507//heart development;GO:0006720//isoprenoid metabolic process;GO:0048513/…
Unigene0000098	55.6666666666667	68.3333333333333	1.2256	0.6277	1.6573	0.8837	1.6182	1.1543	1.1702	1.21873333333333	0.0586273662945706	0.926029575892143	1	no	GDPD1	PREDICTED: glycerophosphodiester phosphodiesterase domain-containing protein 1-like isoform X2 [Sinocyclocheilus rhinocerous]	-	-	GO:0016787//hydrolase activity;GO:0003824//catalytic activity;GO:0016788//hydrolase activity, acting on ester bonds;GO:0042578//phosphoric ester hydrolase activity;GO:0008081//phosphoric diester hydrolase activity	GO:0044238//primary metabolic process;GO:0044763//single-organism cellular process;GO:0044710//single-organism metabolic process;GO:0044699//single-organism process;GO:0006066//alcohol metabolic process;GO:0044237//cellular metabolic process;GO:0019751//polyol metabolic process;GO:0009987//cellular process;GO:1901615//organic hydroxy compound metabolic process;GO:0044723//single-organism carbohyd…
Unigene0000099	1916.33333333333	1926	17.5010	19.1825	20.3327	16.7793	12.9550	16.9776	19.0054	15.5706333333333	-0.287581762387409	0.356334962146726	0.993967823131616	no	GPSM2	PREDICTED: G-protein-signaling modulator 2-like isoform X1 [Sinocyclocheilus anshuiensis]	-	-	GO:0030234//enzyme regulator activity;GO:0098772//molecular function regulator;GO:0060589//nucleoside-triphosphatase regulator activity	GO:0040001//establishment of mitotic spindle localization;GO:0044699//single-organism process;GO:0051716//cellular response to stimulus;GO:1902580//single-organism cellular localization;GO:0007049//cell cycle;GO:0007154//cell communication;GO:0050794//regulation of cellular process;GO:0000278//mitotic cell cycle;GO:0071840//cellular component organization or biogenesis;GO:0051293//establishment o…
Unigene0000100	14	14.3333333333333	0.5739	0.4445	0.6964	0.4224	0.6401	0.4013	0.5716	0.487933333333333	-0.228321871595652	0.730979707476433	1	no	-	--	-	-	-	-
Unigene0000101	19	17	1.5320	0.7495	1.6440	1.2054	1.0194	0.6766	1.3085	0.967133333333333	-0.436127219459079	0.495781463692217	1	no	-	--	-	-	-	-
Unigene0000102	81	59.3333333333333	1.4590	0.5365	1.3543	0.3813	0.9896	0.6726	1.1166	0.681166666666667	-0.713032718593442	0.194093319879945	0.923053291877984	no	Cers1	PREDICTED: ceramide synthase 1-like [Sinocyclocheilus anshuiensis]	ko01100//Metabolic pathways//Global and Overview//Metabolism;ko00600//Sphingolipid metabolism//Lipid metabolism//Metabolism	-	-	-
Unigene0000103	1240.33333333333	1632.66666666667	10.8802	11.7686	17.5807	16.5882	16.5255	11.2816	13.4098333333333	14.7984333333333	0.142153143508505	0.683132864879819	1	no	Pnpla2	PREDICTED: patatin-like phospholipase domain-containing protein 2 [Sinocyclocheilus anshuiensis]	ko01100//Metabolic pathways//Global and Overview//Metabolism;ko00561//Glycerolipid metabolism//Lipid metabolism//Metabolism	-	-	-
Unigene0000104	9.66666666666667	3	1.2488	1.0714	0.2798	0.1958	0.2857	0.1343	0.866666666666667	0.205266666666667	-2.07797785075836	0.022148159987094	0.551162482612058	no	-	--	-	-	-	-
Unigene0000105	5.66666666666667	4.33333333333333	0.4407	0.0819	0.7060	0.2396	0.1966	0.3698	0.409533333333333	0.268666666666667	-0.608163544548589	0.586361331494684	1	no	-	--	-	-	-	-
Unigene0000106	78.6666666666667	83	15.1687	11.3405	8.4040	7.3940	9.8091	11.8745	11.6377333333333	9.69253333333333	-0.263864397078711	0.580890821164892	1	no	-	--	-	-	-	-
Unigene0000107	20.3333333333333	24.3333333333333	3.0368	2.2090	1.9228	2.1531	1.0801	3.5082	2.38953333333333	2.24713333333333	-0.0886431637637098	0.913207098087993	1	no	-	--	-	-	-	-
Unigene0000108	345.333333333333	412.333333333333	23.7839	19.0528	21.6351	22.0814	12.1102	27.6672	21.4906	20.6196	-0.0596894160854152	0.883057211841927	1	no	-	--	-	-	-	-
Unigene0000109	790.666666666667	834.666666666667	64.5916	42.3169	58.7472	53.3987	32.4815	55.3440	55.2185666666667	47.0747333333333	-0.230200517369962	0.527951954100917	1	no	-	--	-	-	-	-
Unigene0000110	83.6666666666667	47.3333333333333	0.9318	1.8959	2.4388	1.1978	0.6555	0.6515	1.7555	0.834933333333333	-1.0721490833506	0.0418257855376042	0.678730739294093	no	-	--	-	-	-	-
Unigene0000111	36.3333333333333	22.3333333333333	0.9932	1.0155	1.1089	0.3149	0.5909	0.6713	1.0392	0.5257	-0.983161695876005	0.067801714028559	0.764664869759393	no	-	--	-	-	-	-
Unigene0000112	9.33333333333333	5.66666666666667	1.0506	0.4438	0.8345	0.1298	0.4261	0.6010	0.7763	0.385633333333333	-1.00938452707793	0.205508937275913	0.930698361934825	no	-	--	-	-	-	-
Unigene0000113	11.3333333333333	4.66666666666667	1.6899	0.8726	0.4102	0.1276	0.2793	0.5252	0.9909	0.3107	-1.67321722888484	0.0438054961312961	0.686007293016126	no	-	--	-	-	-	-
Unigene0000114	32.3333333333333	26	1.1702	1.2042	1.1564	0.7099	0.8080	0.7890	1.17693333333333	0.768966666666667	-0.614039635716626	0.23294775926516	0.947815895265116	no	GABRG1	PREDICTED: gamma-aminobutyric acid receptor subunit gamma-1-like [Sinocyclocheilus grahami]	ko04080//Neuroactive ligand-receptor interaction//Signaling molecules and interaction//Environmental Information Processing	GO:0044425//membrane part;GO:0016020//membrane;GO:0031224//intrinsic component of membrane	GO:0005215//transporter activity;GO:0022838//substrate-specific channel activity;GO:0099600//transmembrane receptor activity;GO:0022891//substrate-specific transmembrane transporter activity;GO:0022857//transmembrane transporter activity;GO:0015276//ligand-gated ion channel activity;GO:0022892//substrate-specific transporter activity;GO:0022836//gated channel activity;GO:0005216//ion channel acti…	GO:0051234//establishment of localization;GO:0006811//ion transport;GO:0023052//signaling;GO:0006810//transport;GO:0009987//cellular process;GO:0007186//G-protein coupled receptor signaling pathway;GO:1902578//single-organism localization;GO:0051716//cellular response to stimulus;GO:0051179//localization;GO:0050794//regulation of cellular process;GO:0044763//single-organism cellular process;GO:00…
Unigene0000115	8.33333333333333	6	0.8798	0.0909	1.0678	0.6643	0.1454	0.4101	0.6795	0.4066	-0.740863335810021	0.446447908891648	1	no	-	--	-	-	-	-
Unigene0000116	19.3333333333333	14.6666666666667	1.4710	1.7694	1.1971	0.8819	1.4157	0.4235	1.47916666666667	0.907033333333333	-0.705557143125431	0.273946644852517	0.968837064516613	no	ywhag1	PREDICTED: 14-3-3 protein gamma-like, partial [Anolis carolinensis]	ko04110//Cell cycle//Cell growth and death//Cellular Processes;ko04114//Oocyte meiosis//Cell growth and death//Cellular Processes	-	-	-
Unigene0000117	23.3333333333333	18.3333333333333	1.1150	1.2667	1.3532	0.7155	1.1056	0.6064	1.24496666666667	0.809166666666667	-0.621598320479702	0.292068873182627	0.977186660753406	no	-	--	-	-	-	-
Unigene0000118	384.666666666667	332.666666666667	2.5923	3.8242	3.3677	2.4153	1.8913	2.5885	3.2614	2.29836666666667	-0.504882419094763	0.169393885837106	0.904702038340292	no	Prickle1	PREDICTED: prickle-like protein 1 [Sinocyclocheilus anshuiensis]	ko04310//Wnt signaling pathway//Signal transduction//Environmental Information Processing	-	GO:0043169//cation binding;GO:0043167//ion binding;GO:0046872//metal ion binding;GO:0005488//binding;GO:0046914//transition metal ion binding	GO:0007420//brain development;GO:0044699//single-organism process;GO:0032501//multicellular organismal process;GO:0007417//central nervous system development;GO:0060322//head development;GO:0051179//localization;GO:0048870//cell motility;GO:0048856//anatomical structure development;GO:0044763//single-organism cellular process;GO:0007399//nervous system development;GO:0051674//localization of cell…
Unigene0000119	20	23.3333333333333	1.2746	0.5077	1.3259	0.7424	1.1284	1.1459	1.03606666666667	1.00556666666667	-0.0431081055091387	0.969126673449355	1	no	-	--	-	-	-	-
Unigene0000120	65	61.6666666666667	1.1544	1.0534	1.3143	0.8557	1.2018	0.7044	1.17403333333333	0.920633333333333	-0.350774786026674	0.456412353270731	1	no	Kazn	PREDICTED: kazrin-like [Sinocyclocheilus grahami]	-	-	-	-
Unigene0000121	13.6666666666667	5	0.4195	1.3647	0.7127	0.2375	0.3640	0.1467	0.8323	0.2494	-1.73864217197359	0.0228574781694853	0.555812577391047	no	-	--	-	-	-	-
Unigene0000122	311.333333333333	301.333333333333	2.0506	1.6385	2.1166	1.3249	1.4714	1.8011	1.93523333333333	1.53246666666667	-0.336651830690957	0.361649979902128	0.995280984019575	no	ARHGEF10L	PREDICTED: rho guanine nucleotide exchange factor 10-like protein [Cyprinus carpio]	-	-	-	-
Unigene0000123	3	1.66666666666667	0.0992	0.4611	0.2167	0.0000	0.2214	0.1388	0.259	0.120066666666667	-1.10911641738879	0.475548562759501	1	no	-	--	-	-	-	-
Unigene0000124	15.6666666666667	13.6666666666667	1.8360	1.1093	0.9358	0.7485	1.1606	0.7703	1.2937	0.893133333333333	-0.534555632830763	0.421531384735247	1	no	-	PREDICTED: transcription elongation factor A protein 3-like isoform X5 [Sinocyclocheilus rhinocerous]	-	GO:0005623//cell;GO:0043227//membrane-bounded organelle;GO:0044464//cell part;GO:0043231//intracellular membrane-bounded organelle;GO:0044424//intracellular part;GO:0043229//intracellular organelle;GO:0005622//intracellular;GO:0043226//organelle	GO:0043167//ion binding;GO:0003676//nucleic acid binding;GO:0043169//cation binding;GO:0003723//RNA binding;GO:0005488//binding;GO:0008135//translation factor activity, RNA binding;GO:0097159//organic cyclic compound binding;GO:1901363//heterocyclic compound binding;GO:0046872//metal ion binding;GO:0046914//transition metal ion binding	GO:0044238//primary metabolic process;GO:0044237//cellular metabolic process;GO:0090304//nucleic acid metabolic process;GO:0006412//translation;GO:0009987//cellular process;GO:0006725//cellular aromatic compound metabolic process;GO:0006366//transcription from RNA polymerase II promoter;GO:0008152//metabolic process;GO:0044267//cellular protein metabolic process;GO:0044260//cellular macromolecule…
Unigene0000125	2500.33333333333	3912	45.7803	46.2047	62.9785	71.3131	70.1830	59.7125	51.6545	67.0695333333333	0.376763525637234	0.224334966102385	0.942319046487822	no	TSNAX	translin-associated protein X [Danio rerio]	-	-	GO:0003676//nucleic acid binding;GO:0003677//DNA binding;GO:0097159//organic cyclic compound binding;GO:1901363//heterocyclic compound binding;GO:0005488//binding	-
Unigene0000126	2.33333333333333	2.33333333333333	0.0000	0.1521	0.2979	0.0000	0.1217	0.2861	0.15	0.135933333333333	-0.142063226087807	1	1	no	-	--	-	-	-	-
Unigene0000127	20	13.6666666666667	3.8619	0.3339	0.8502	0.2441	0.6011	1.7583	1.682	0.867833333333333	-0.954687799586052	0.304572355242012	0.980241562861886	no	-	--	-	-	-	-
Unigene0000128	1126.33333333333	1542.66666666667	13.2993	14.8136	16.6718	15.8613	18.2430	16.4516	14.9282333333333	16.8519666666667	0.174873526062859	0.58393677496395	1	no	Pdhx	PREDICTED: pyruvate dehydrogenase protein X component, mitochondrial isoform X1 [Sinocyclocheilus grahami]	ko01100//Metabolic pathways//Global and Overview//Metabolism;ko00010//Glycolysis / Gluconeogenesis//Carbohydrate metabolism//Metabolism;ko00620//Pyruvate metabolism//Carbohydrate metabolism//Metabolism;ko00020//Citrate cycle (TCA cycle)//Carbohydrate metabolism//Metabolism	-	GO:0016740//transferase activity;GO:0003824//catalytic activity	-
Unigene0000129	290.666666666667	200.333333333333	1.3389	1.7206	3.3829	1.0014	1.8310	1.0242	2.14746666666667	1.28553333333333	-0.740268718659902	0.106947180417196	0.831319339175699	no	EML1	PREDICTED: echinoderm microtubule-associated protein-like 1 isoform X5 [Sinocyclocheilus rhinocerous]	-	-	-	-
Unigene0000130	15	10.6666666666667	0.8194	0.3808	0.5967	0.3402	0.4062	0.2865	0.598966666666667	0.3443	-0.798809536341951	0.228319842490193	0.9450396184942	no	-	--	-	-	-	-
Unigene0000131	6.66666666666667	5.33333333333333	0.8721	0.6305	0.2822	0.5926	0.3603	0.1355	0.594933333333333	0.3628	-0.713553556994461	0.442524069829415	1	no	-	--	-	-	-	-
Unigene0000132	29.3333333333333	14.3333333333333	0.4029	2.2470	1.1736	0.1027	0.8240	0.6339	1.2745	0.5202	-1.29279306896657	0.0970861282413356	0.819608956117396	no	-	--	-	-	-	-
Unigene0000133	287.333333333333	376.333333333333	4.5641	4.3785	4.7515	5.5424	4.3893	4.6396	4.5647	4.8571	0.0895751425693149	0.804818723418152	1	no	sdhdb	PREDICTED: succinate dehydrogenase [ubiquinone] cytochrome b small subunit B, mitochondrial-like [Sinocyclocheilus anshuiensis]	ko01100//Metabolic pathways//Global and Overview//Metabolism;ko01110//Biosynthesis of secondary metabolites//Global and Overview//Metabolism;ko01130//Biosynthesis of antibiotics//Global and Overview//Metabolism;ko01120//Microbial metabolism in diverse environments//Global and Overview//Metabolism;ko00190//Oxidative phosphorylation//Energy metabolism//Metabolism;ko01200//Carbon metabolism//Global …	GO:0005622//intracellular;GO:0044429//mitochondrial part;GO:0044455//mitochondrial membrane part;GO:0031975//envelope;GO:0044424//intracellular part;GO:0031966//mitochondrial membrane;GO:0031090//organelle membrane;GO:0043229//intracellular organelle;GO:0044446//intracellular organelle part;GO:0016020//membrane;GO:0005746//mitochondrial respiratory chain;GO:0044422//organelle part;GO:0043226//org…	GO:0048038//quinone binding;GO:0046906//tetrapyrrole binding;GO:0048037//cofactor binding;GO:1901363//heterocyclic compound binding;GO:0005488//binding;GO:0097159//organic cyclic compound binding	GO:0044710//single-organism metabolic process;GO:0044699//single-organism process;GO:0008152//metabolic process;GO:0055114//oxidation-reduction process
Unigene0000134	57.3333333333333	75.6666666666667	4.5028	3.7667	5.0492	7.7100	4.8889	1.7631	4.43956666666667	4.78733333333333	0.108803395659073	0.850779179872159	1	no	-	--	-	-	-	-
Unigene0000135	229.333333333333	191.666666666667	3.3161	5.5952	3.7835	2.2102	4.6180	1.8757	4.2316	2.9013	-0.544503779726407	0.231905636319823	0.947815895265116	no	Chi3l1	PREDICTED: acidic mammalian chitinase isoform X1 [Sinocyclocheilus rhinocerous]	-	-	-	-
Unigene0000136	15.6666666666667	23	2.7373	0.5452	0.9254	0.9300	1.3086	2.5292	1.40263333333333	1.58926666666667	0.180223299154392	0.801857610374694	1	no	-	--	-	-	-	-
Unigene0000137	25	28.3333333333333	1.7924	0.4813	0.4931	0.2436	0.7702	1.3926	0.922266666666667	0.802133333333333	-0.201341889406763	0.807125908931508	1	no	-	--	-	-	-	-
Unigene0000138	24	18.3333333333333	1.6570	2.6273	1.8453	0.9934	1.0873	1.7039	2.0432	1.26153333333333	-0.695652103189556	0.220856438026349	0.940880886627525	no	-	--	-	-	-	-
Unigene0000139	0.333333333333333	0.666666666666667	0.0000	0.0636	0.0000	0.0000	0.0000	0.0958	0.0212	0.0319333333333333	0.590998890451823	1	1	no	-	--	-	-	-	-
Unigene0000140	436.333333333333	554.333333333333	8.4874	5.7671	9.0814	9.0383	7.2223	8.0386	7.77863333333333	8.09973333333333	0.0583577078528956	0.872581121546647	1	no	b9d2	PREDICTED: B9 domain-containing protein 2-like [Sinocyclocheilus grahami]	-	GO:0044430//cytoskeletal part;GO:0043232//intracellular non-membrane-bounded organelle;GO:0044463//cell projection part;GO:0044446//intracellular organelle part;GO:0035869//ciliary transition zone;GO:0043228//non-membrane-bounded organelle;GO:0015630//microtubule cytoskeleton;GO:0005856//cytoskeleton;GO:0044464//cell part;GO:0044424//intracellular part;GO:0043229//intracellular organelle;GO:00315…	GO:0008092//cytoskeletal protein binding;GO:0015631//tubulin binding;GO:0005488//binding;GO:0005515//protein binding	GO:0044763//single-organism cellular process;GO:0044767//single-organism developmental process;GO:0071702//organic substance transport;GO:0071840//cellular component organization or biogenesis;GO:0015031//protein transport;GO:0006810//transport;GO:0016043//cellular component organization;GO:0010927//cellular component assembly involved in morphogenesis;GO:0009987//cellular process;GO:0008104//pro…
Unigene0000141	713	491	11.6966	8.1826	4.4122	5.1043	1.5421	6.0861	8.09713333333333	4.24416666666667	-0.931929922794022	0.0626353888347865	0.755932943861388	no	Sertad4	PREDICTED: SERTA domain-containing protein 4-like [Mesocricetus auratus]	-	-	-	-
Unigene0000142	5.33333333333333	6.66666666666667	0.2515	0.2338	0.3663	0.1282	0.5144	0.2638	0.283866666666667	0.302133333333333	0.0899719113682182	0.999999999999999	1	no	-	PREDICTED: cysteine-rich motor neuron 1 protein-like [Cyprinus carpio]	-	-	GO:0030234//enzyme regulator activity;GO:0004857//enzyme inhibitor activity;GO:0098772//molecular function regulator	GO:0043086//negative regulation of catalytic activity;GO:0048519//negative regulation of biological process;GO:0044092//negative regulation of molecular function;GO:0065009//regulation of molecular function;GO:0065007//biological regulation;GO:0050789//regulation of biological process;GO:0009892//negative regulation of metabolic process;GO:0019222//regulation of metabolic process;GO:0050790//regu…
Unigene0000143	439.333333333333	627	3.9247	4.2823	5.4848	5.6647	5.8917	4.6618	4.56393333333333	5.40606666666667	0.244301585119218	0.484747147933156	1	no	Pomt1	PREDICTED: protein O-mannosyl-transferase 1-like [Cyprinus carpio]	ko01100//Metabolic pathways//Global and Overview//Metabolism;ko00514//Other types of O-glycan biosynthesis//Glycan biosynthesis and metabolism//Metabolism	-	GO:0000030//mannosyltransferase activity;GO:0016757//transferase activity, transferring glycosyl groups;GO:0016740//transferase activity;GO:0016758//transferase activity, transferring hexosyl groups;GO:0003824//catalytic activity	GO:0043170//macromolecule metabolic process;GO:0044763//single-organism cellular process;GO:0043413//macromolecule glycosylation;GO:0044699//single-organism process;GO:0044723//single-organism carbohydrate metabolic process;GO:0044267//cellular protein metabolic process;GO:0008152//metabolic process;GO:0005975//carbohydrate metabolic process;GO:0034645//cellular macromolecule biosynthetic process…
Unigene0000144	36	50.6666666666667	0.6249	0.6223	0.8125	0.6975	0.7302	0.9675	0.686566666666667	0.7984	0.217711905620138	0.668718533376272	1	no	Nrcam	PREDICTED: neuronal cell adhesion molecule-like isoform X2 [Sinocyclocheilus anshuiensis]	ko04514//Cell adhesion molecules (CAMs)//Signaling molecules and interaction//Environmental Information Processing	-	-	-
Unigene0000145	61	80.3333333333333	3.0410	2.0189	4.4738	3.2892	3.1383	4.1224	3.1779	3.51663333333333	0.146121190546881	0.767760932192107	1	no	-	--	-	-	-	-
Unigene0000146	2548	2965	10.1142	8.6683	10.2150	8.6901	9.0877	9.7448	9.66583333333333	9.1742	-0.0753117598848789	0.802101588268329	1	no	KDM6B	PREDICTED: LOW QUALITY PROTEIN: lysine-specific demethylase 6B-like [Cyprinus carpio]	-	-	-	-
Unigene0000147	13	9.33333333333333	0.8522	0.9681	1.3100	0.5790	1.1266	0.1986	1.04343333333333	0.634733333333333	-0.717115913727631	0.323166192991629	0.985762684824277	no	-	--	-	-	-	-
Unigene0000148	113.333333333333	162.333333333333	4.5903	4.4605	1.7725	3.8751	2.7154	5.3007	3.60776666666667	3.96373333333333	0.135753871212881	0.783216963170907	1	no	-	--	-	-	-	-
Unigene0000149	912.333333333333	818	12.1532	8.6856	9.7883	7.5639	6.7784	7.7480	10.2090333333333	7.36343333333333	-0.471395756862185	0.157643780366066	0.896000367261668	no	KLF9	PREDICTED: Krueppel-like factor 9 [Sinocyclocheilus rhinocerous]	-	-	GO:0005488//binding;GO:0043167//ion binding;GO:0043169//cation binding	-
Unigene0000150	2671.66666666667	3316.33333333333	23.6090	20.6019	23.6058	25.4283	22.2366	20.7918	22.6055666666667	22.8189	0.0135511642729228	0.964564363172179	1	no	RPS6KB1	PREDICTED: ribosomal protein S6 kinase beta-1-like [Sinocyclocheilus anshuiensis]	ko04910//Insulin signaling pathway//Endocrine system//Organismal Systems;ko04012//ErbB signaling pathway//Signal transduction//Environmental Information Processing;ko04350//TGF-beta signaling pathway//Signal transduction//Environmental Information Processing;ko04150//mTOR signaling pathway//Signal transduction//Environmental Information Processing	-	GO:0001883//purine nucleoside binding;GO:0016772//transferase activity, transferring phosphorus-containing groups;GO:0097159//organic cyclic compound binding;GO:0036094//small molecule binding;GO:0032549//ribonucleoside binding;GO:0016773//phosphotransferase activity, alcohol group as acceptor;GO:0016740//transferase activity;GO:0003824//catalytic activity;GO:0016301//kinase activity;GO:0032550//…	GO:0006793//phosphorus metabolic process;GO:0044267//cellular protein metabolic process;GO:0008152//metabolic process;GO:0007154//cell communication;GO:0044763//single-organism cellular process;GO:0044238//primary metabolic process;GO:0044260//cellular macromolecule metabolic process;GO:0071704//organic substance metabolic process;GO:0019538//protein metabolic process;GO:0043170//macromolecule me…
Unigene0000151	7413.33333333333	6236.33333333333	233.7311	307.9180	247.0884	153.5105	282.1050	108.7260	262.9125	181.447166666667	-0.53503320653783	0.147649915190663	0.883094517112534	no	CNFN	plac8 onzin related protein 1 [Danio rerio]	-	-	-	GO:0032502//developmental process;GO:0007275//multicellular organism development;GO:0044767//single-organism developmental process;GO:0048856//anatomical structure development;GO:0048731//system development;GO:0044707//single-multicellular organism process;GO:0044699//single-organism process;GO:0032501//multicellular organismal process;GO:0009653//anatomical structure morphogenesis
Unigene0000152	559	475.666666666667	25.9907	19.8946	20.3988	14.6353	9.8648	20.5314	22.0947	15.0105	-0.557728308480207	0.142208937983346	0.876698728288776	no	-	--	-	-	-	-
Unigene0000153	63.6666666666667	83	5.7555	6.2124	3.8529	10.8491	1.5188	3.5700	5.2736	5.31263333333333	0.0106389968662669	0.991500868364591	1	no	-	--	-	-	-	-
Unigene0000154	9586	14442.6666666667	62.7509	71.8897	75.2483	94.7950	88.6851	75.5193	69.9629666666667	86.3331333333333	0.303322884212472	0.30615522561717	0.981032979903768	no	Kpnb1	PREDICTED: importin subunit beta-1 isoform X1 [Sinocyclocheilus rhinocerous]	ko03013//RNA transport//Translation//Genetic Information Processing	-	-	-
Unigene0000155	69	161.666666666667	1.0498	0.1976	1.0837	0.9661	2.8954	0.7898	0.777033333333333	1.55043333333333	0.996623099130205	0.126387260174767	0.858197878651493	no	slc17a8	PREDICTED: vesicular glutamate transporter 3 [Cyprinus carpio]	-	GO:0044456//synapse part;GO:0042995//cell projection;GO:0005623//cell;GO:0005622//intracellular;GO:0031410//cytoplasmic vesicle;GO:0005737//cytoplasm;GO:0043226//organelle;GO:0045202//synapse;GO:0031982//vesicle;GO:0016023//cytoplasmic, membrane-bounded vesicle;GO:0043229//intracellular organelle;GO:0099503//secretory vesicle;GO:0044444//cytoplasmic part;GO:0043231//intracellular membrane-bounded…	GO:0022804//active transmembrane transporter activity;GO:0015291//secondary active transmembrane transporter activity;GO:0005215//transporter activity;GO:0022857//transmembrane transporter activity	GO:0044765//single-organism transport;GO:0023052//signaling;GO:0044699//single-organism process;GO:0044763//single-organism cellular process;GO:0050877//neurological system process;GO:0006810//transport;GO:0003008//system process;GO:0007154//cell communication;GO:0007600//sensory perception;GO:0032501//multicellular organismal process;GO:0009987//cellular process;GO:0050896//response to stimulus;…
Unigene0000156	11	17.6666666666667	1.2721	0.1867	0.5363	0.9098	0.6970	0.8894	0.665033333333333	0.832066666666667	0.323272469956992	0.694180253631258	1	no	MAP1B	PREDICTED: electromotor neuron-associated protein 1-like, partial [Sinocyclocheilus grahami]	-	-	-	-
Unigene0000157	1320.33333333333	1377.66666666667	18.6034	24.1386	24.2030	13.3214	31.4092	13.5299	22.315	19.4201666666667	-0.200458224362954	0.610329553659188	1	no	Prss16	Zgc:158605 [Danio rerio]	-	-	GO:0003824//catalytic activity;GO:0016787//hydrolase activity;GO:0008233//peptidase activity;GO:0070011//peptidase activity, acting on L-amino acid peptides	GO:0071704//organic substance metabolic process;GO:0008152//metabolic process;GO:0051604//protein maturation;GO:0044238//primary metabolic process;GO:0019538//protein metabolic process;GO:0016485//protein processing;GO:0006508//proteolysis;GO:0043170//macromolecule metabolic process;GO:0010467//gene expression
Unigene0000158	729.666666666667	998	4.6436	5.0643	6.1578	5.4755	6.1377	6.3338	5.28856666666667	5.98233333333333	0.177831530100159	0.59290165058436	1	no	TECPR1	PREDICTED: tectonin beta-propeller repeat-containing protein 1-like isoform X3 [Sinocyclocheilus anshuiensis]	-	-	-	-
Unigene0000159	33.3333333333333	44	1.4739	0.4982	1.7887	1.1229	1.7604	1.3117	1.2536	1.39833333333333	0.157631225020808	0.802718631032395	1	no	-	--	-	-	-	-
Unigene0000160	48.6666666666667	52.3333333333333	0.5071	0.5473	0.9410	0.6224	0.7299	0.4689	0.665133333333333	0.607066666666667	-0.131788615146619	0.798257943404748	1	no	HS3ST5	PREDICTED: heparan sulfate glucosamine 3-O-sulfotransferase 5 [Cyprinus carpio]	ko00534//Glycosaminoglycan biosynthesis - heparan sulfate / heparin//Glycan biosynthesis and metabolism//Metabolism	-	-	-
Unigene0000161	2110	2026.33333333333	15.3714	12.5240	13.4227	11.6017	9.3538	11.0144	13.7727	10.6566333333333	-0.370059682385999	0.230082992861524	0.946394205993412	no	Rps6kb1	PREDICTED: ribosomal protein S6 kinase beta-1-like [Danio rerio]	ko04910//Insulin signaling pathway//Endocrine system//Organismal Systems;ko04012//ErbB signaling pathway//Signal transduction//Environmental Information Processing;ko04350//TGF-beta signaling pathway//Signal transduction//Environmental Information Processing;ko04150//mTOR signaling pathway//Signal transduction//Environmental Information Processing	-	GO:0032549//ribonucleoside binding;GO:0003824//catalytic activity;GO:0097159//organic cyclic compound binding;GO:1901363//heterocyclic compound binding;GO:0097367//carbohydrate derivative binding;GO:0001882//nucleoside binding;GO:0004672//protein kinase activity;GO:0036094//small molecule binding;GO:0032550//purine ribonucleoside binding;GO:0005488//binding;GO:0016773//phosphotransferase activity…	GO:0044260//cellular macromolecule metabolic process;GO:0043170//macromolecule metabolic process;GO:0036211//protein modification process;GO:0044237//cellular metabolic process;GO:0044763//single-organism cellular process;GO:0044699//single-organism process;GO:0019538//protein metabolic process;GO:0043412//macromolecule modification;GO:0006464//cellular protein modification process;GO:0044238//pr…
Unigene0000162	27.6666666666667	47.3333333333333	0.9292	0.9459	1.2565	0.8117	1.7110	1.9491	1.04386666666667	1.4906	0.513955716871204	0.350754242260706	0.991184679460046	no	-	--	-	-	-	-
Unigene0000163	16.3333333333333	35.6666666666667	0.0917	1.1082	0.1558	0.6024	1.0004	0.7268	0.4519	0.776533333333333	0.781044297806536	0.315469503143939	0.982847421427122	no	-	apolipoprotein M [Hemibarbus mylodon]	-	-	-	-
Unigene0000164	20	40.3333333333333	0.8498	0.7067	0.7816	1.4587	1.2306	1.1258	0.779366666666667	1.2717	0.706384238023274	0.184333651470686	0.918495202442819	no	-	--	-	-	-	-
Unigene0000165	3.66666666666667	1.33333333333333	0.4748	0.1765	0.2766	0.0645	0.0000	0.1992	0.3093	0.0879	-1.81507176294586	0.126572092124838	0.858282961805973	no	-	--	-	-	-	-
Unigene0000166	35.3333333333333	63.6666666666667	1.5741	0.6009	0.5526	1.1078	1.2333	1.4544	0.9092	1.26516666666667	0.476657861528666	0.388045089980054	1	no	-	gag-like protein [Danio rerio]	-	-	-	-
Unigene0000167	13.6666666666667	0.666666666666667	0.0000	1.8878	0.0000	0.0000	0.0737	0.0000	0.629266666666667	0.0245666666666667	-4.67889749919436	0.0176981651082256	0.506978048112491	no	Gpr87	PREDICTED: G-protein coupled receptor 87-like [Sinocyclocheilus rhinocerous]	ko04080//Neuroactive ligand-receptor interaction//Signaling molecules and interaction//Environmental Information Processing	-	-	-
Unigene0000168	10.6666666666667	11.3333333333333	1.2711	0.6751	0.6611	0.7403	1.3504	0.1270	0.8691	0.739233333333333	-0.233492373447726	0.824577591783005	1	no	-	PREDICTED: metalloreductase STEAP2-like [Sinocyclocheilus rhinocerous]	-	-	-	-
Unigene0000169	9.66666666666667	12.6666666666667	0.5764	0.8928	0.9093	0.9791	0.5000	1.0747	0.792833333333333	0.851266666666667	0.10259351998056	0.945781617704188	1	no	-	--	-	-	-	-
Unigene0000170	1507	1163	26.0013	17.8672	16.5473	15.6147	6.8627	14.1452	20.1386	12.2075333333333	-0.722191675874584	0.0607105953236151	0.751516360781522	no	BBS10	PREDICTED: Bardet-Biedl syndrome 10 protein-like isoform X1 [Sinocyclocheilus rhinocerous]	-	-	GO:0032549//ribonucleoside binding;GO:0001883//purine nucleoside binding;GO:0001882//nucleoside binding;GO:0032550//purine ribonucleoside binding;GO:1901363//heterocyclic compound binding;GO:0097159//organic cyclic compound binding;GO:0097367//carbohydrate derivative binding;GO:0005488//binding;GO:0036094//small molecule binding	GO:0071704//organic substance metabolic process;GO:0044238//primary metabolic process;GO:0019538//protein metabolic process;GO:0008152//metabolic process;GO:0043170//macromolecule metabolic process
Unigene0000171	34.6666666666667	40.3333333333333	1.4459	1.9353	1.8109	0.9825	2.1505	1.8603	1.7307	1.66443333333333	-0.0563245828312115	0.919957352156349	1	no	-	--	-	-	-	-
Unigene0000172	6	5.66666666666667	0.7468	0.1735	0.5438	0.1903	0.4165	0.5222	0.488033333333333	0.376333333333333	-0.374968608888826	0.686886370447575	1	no	-	--	-	-	-	-
Unigene0000173	181.333333333333	125.666666666667	3.3335	6.4808	3.4994	2.1140	4.2763	1.1266	4.4379	2.50563333333333	-0.824701848838369	0.114992394040449	0.845305530561639	no	-	PREDICTED: E3 ubiquitin-protein ligase DTX3L-like [Sinocyclocheilus rhinocerous]	ko04330//Notch signaling pathway//Signal transduction//Environmental Information Processing	-	-	-
Unigene0000174	1556.33333333333	1867.66666666667	20.3930	18.7446	18.5128	21.4523	16.1114	18.1427	19.2168	18.5688	-0.0494875323527524	0.875250884750852	1	no	DNAJB1	PREDICTED: dnaJ homolog subfamily B member 1-like [Sinocyclocheilus grahami]	ko04141//Protein processing in endoplasmic reticulum//Folding, sorting and degradation//Genetic Information Processing	-	GO:0005488//binding;GO:0005515//protein binding	GO:0043170//macromolecule metabolic process;GO:0008152//metabolic process;GO:0044260//cellular macromolecule metabolic process;GO:0009987//cellular process;GO:0044238//primary metabolic process;GO:0019538//protein metabolic process;GO:0044237//cellular metabolic process;GO:0071704//organic substance metabolic process;GO:0044267//cellular protein metabolic process
Unigene0000175	2.66666666666667	1.33333333333333	0.1883	0.0000	0.4113	0.1919	0.0700	0.0000	0.199866666666667	0.0873	-1.19498432359727	0.421410995524408	1	no	-	--	-	-	-	-
Unigene0000176	160.333333333333	194	1.5691	1.7407	1.9257	1.4961	2.4372	1.3183	1.74516666666667	1.75053333333333	0.00442971048364418	0.994713631687581	1	no	GLB1L2	PREDICTED: beta-galactosidase-1-like protein 2 [Sinocyclocheilus rhinocerous]	-	-	GO:0003824//catalytic activity;GO:0004553//hydrolase activity, hydrolyzing O-glycosyl compounds;GO:0016798//hydrolase activity, acting on glycosyl bonds;GO:0016787//hydrolase activity;GO:0015925//galactosidase activity	GO:0044238//primary metabolic process;GO:0008152//metabolic process
Unigene0000177	2311	3341	15.1059	20.3203	18.0192	20.5585	23.3213	19.3011	17.8151333333333	21.0603	0.24142270639254	0.430917460899538	1	no	snd1	staphylococcal nuclease domain-containing protein 1 isoform p100L [Danio rerio]	-	GO:1990904//ribonucleoprotein complex;GO:0030529//intracellular ribonucleoprotein complex;GO:0005622//intracellular;GO:0044464//cell part;GO:0032991//macromolecular complex;GO:0044424//intracellular part;GO:0005623//cell;GO:0031332//RNAi effector complex	GO:0016787//hydrolase activity;GO:0003824//catalytic activity;GO:0097159//organic cyclic compound binding;GO:0016788//hydrolase activity, acting on ester bonds;GO:0005488//binding	GO:0050789//regulation of biological process;GO:0044699//single-organism process;GO:0010468//regulation of gene expression;GO:0060255//regulation of macromolecule metabolic process;GO:0009987//cellular process;GO:0065007//biological regulation;GO:0019222//regulation of metabolic process;GO:0048519//negative regulation of biological process;GO:0009892//negative regulation of metabolic process;GO:0…
Unigene0000178	14	21	0.6217	0.7556	0.4179	0.5849	0.6757	0.8694	0.5984	0.71	0.24670884939177	0.699310898675318	1	no	-	--	-	-	-	-
Unigene0000179	227	171.666666666667	2.2755	1.4733	2.0110	1.4008	1.1064	1.0199	1.91993333333333	1.1757	-0.707536237725004	0.0760602317502914	0.785177780972202	no	Parp12	PREDICTED: poly [ADP-ribose] polymerase 12-like [Sinocyclocheilus grahami]	-	-	GO:0005488//binding;GO:0043169//cation binding;GO:0043167//ion binding	-
Unigene0000180	13.3333333333333	5.33333333333333	1.2221	0.5345	0.7852	0.1954	0.4277	0.2011	0.847266666666667	0.274733333333333	-1.62478414848844	0.0276187758415234	0.596533278825549	no	-	--	-	-	-	-
Unigene0000181	2738	1870.33333333333	25.3749	24.0507	19.1855	14.9693	5.3464	16.6329	22.8703666666667	12.3162	-0.892922295500694	0.0270256174900364	0.591375947846079	no	QflA-14927	PREDICTED: coiled-coil domain-containing protein 191-like [Sinocyclocheilus rhinocerous]	-	-	-	-
Unigene0000182	44	38.3333333333333	2.1437	2.1541	2.3203	0.9055	1.6804	2.1471	2.20603333333333	1.57766666666667	-0.483662168971891	0.358716011451486	0.994162578408029	no	rpl24	PREDICTED: 60S ribosomal protein L24-like, partial [Panthera pardus]	ko03010//Ribosome//Translation//Genetic Information Processing	-	-	-
Unigene0000183	106	170.666666666667	1.7198	1.0369	1.5230	2.0950	1.5555	1.9283	1.42656666666667	1.8596	0.382445162092633	0.367084770130095	0.996469447253902	no	FSBP	PREDICTED: fibrinogen silencer-binding protein-like [Sinocyclocheilus rhinocerous]	ko03440//Homologous recombination//Replication and repair//Genetic Information Processing	-	-	-
Unigene0000184	257.333333333333	43	4.1376	23.0376	1.3036	0.7028	2.6628	0.3616	9.49293333333333	1.2424	-2.93372421663959	0.00130208755426059	0.152835160353575	no	-	PREDICTED: uncharacterized protein LOC109112478 [Cyprinus carpio]	-	-	-	-
Unigene0000185	26.6666666666667	21	0.5498	0.6530	0.8674	0.3943	0.6360	0.3417	0.690066666666667	0.457333333333333	-0.593489670305661	0.298437262573696	0.978762659211149	no	KCNN3	PREDICTED: small conductance calcium-activated potassium channel protein 3 isoform X1 [Danio rerio]	-	-	-	-
Unigene0000186	3749	2592.33333333333	62.7556	79.7796	59.6496	39.4103	54.4878	19.6615	67.3949333333333	37.8532	-0.832224868847119	0.0285571792451698	0.6018570611218	no	anxa2-a	PREDICTED: annexin A2-like [Sinocyclocheilus grahami]	-	-	GO:0043168//anion binding;GO:0098772//molecular function regulator;GO:0008289//lipid binding;GO:0043167//ion binding;GO:0030234//enzyme regulator activity;GO:0004857//enzyme inhibitor activity;GO:0005543//phospholipid binding;GO:0055102//lipase inhibitor activity;GO:0005515//protein binding;GO:0005488//binding	-
Unigene0000187	10.6666666666667	12.3333333333333	1.1016	0.5120	0.9358	1.1228	0.4779	0.7703	0.8498	0.790333333333333	-0.104662086665073	0.948418930844407	1	no	-	--	-	-	-	-
Unigene0000188	14.3333333333333	27.3333333333333	0.4790	0.5262	0.6025	0.5918	0.7449	1.1876	0.5359	0.841433333333333	0.650885155471028	0.265098175178305	0.964342637242818	no	-	PREDICTED: sorbin and SH3 domain-containing protein 2-like [Sinocyclocheilus rhinocerous]	-	-	-	-
Unigene0000189	3.33333333333333	3.66666666666667	0.0000	0.3336	0.1742	0.1219	0.1779	0.1673	0.169266666666667	0.1557	-0.120528949847315	1	1	no	-	--	-	-	-	-
Unigene0000190	843.666666666667	930	16.0511	13.9155	15.6794	13.6153	12.2917	14.9402	15.2153333333333	13.6157333333333	-0.160251253401628	0.624532603676768	1	no	rbm18	PREDICTED: probable RNA-binding protein 18 [Sinocyclocheilus rhinocerous]	-	-	GO:0005488//binding;GO:1901363//heterocyclic compound binding;GO:0003676//nucleic acid binding;GO:0036094//small molecule binding;GO:0097159//organic cyclic compound binding	-
Unigene0000191	13.3333333333333	17	0.6977	1.1349	1.1431	1.1259	0.1297	1.8294	0.9919	1.02833333333333	0.0520414032273591	0.965677958599691	1	no	-	--	-	-	-	-
Unigene0000192	11	14	0.3922	0.6379	1.5707	0.7328	1.3854	0.8227	0.866933333333333	0.9803	0.17730226767541	0.862546137150837	1	no	-	--	-	-	-	-
Unigene0000193	42	38	1.1182	0.3071	1.2769	0.5526	0.6426	0.8530	0.900733333333333	0.682733333333333	-0.399777861262694	0.50002504529639	1	no	-	UDP glucuronosyltransferase 2 family polypeptide a1 isoform 3 [Danio rerio]	-	-	GO:0016757//transferase activity, transferring glycosyl groups;GO:0016740//transferase activity;GO:0003824//catalytic activity	-
Unigene0000194	412.666666666667	328.666666666667	5.1496	5.0084	4.2909	3.5171	3.5828	2.1623	4.8163	3.0874	-0.641532849200091	0.0842497421731785	0.798628003655133	no	-	--	-	-	-	-
Unigene0000195	9.33333333333333	16.3333333333333	0.5508	1.1093	0.6016	1.3099	1.5702	0.3209	0.7539	1.067	0.501115099109976	0.513931572470331	1	no	-	--	-	-	-	-
Unigene0000196	248.666666666667	356.666666666667	2.7765	2.6570	3.3264	3.4107	4.1296	2.8404	2.91996666666667	3.46023333333333	0.244917426264866	0.511696915468558	1	no	Shpk	PREDICTED: sedoheptulokinase [Sinocyclocheilus rhinocerous]	-	-	GO:0003824//catalytic activity;GO:0016740//transferase activity;GO:0016772//transferase activity, transferring phosphorus-containing groups	-
Unigene0000197	192.666666666667	357	2.8659	4.7145	3.7928	3.8174	8.7451	4.8826	3.79106666666667	5.81503333333333	0.617183634824875	0.150576750262713	0.88569569010375	no	DDO	PREDICTED: D-aspartate oxidase-like [Sinocyclocheilus rhinocerous]	ko04146//Peroxisome//Transport and catabolism//Cellular Processes;ko00250//Alanine, aspartate and glutamate metabolism//Amino acid metabolism//Metabolism	-	GO:0003824//catalytic activity;GO:0016638//oxidoreductase activity, acting on the CH-NH2 group of donors;GO:0016491//oxidoreductase activity;GO:0016641//oxidoreductase activity, acting on the CH-NH2 group of donors, oxygen as acceptor;GO:0003884//D-amino-acid oxidase activity	GO:0008152//metabolic process;GO:0044699//single-organism process;GO:0044710//single-organism metabolic process
Unigene0000198	411.666666666667	310.333333333333	2.3657	3.1571	2.1545	1.6890	1.7803	1.1850	2.5591	1.55143333333333	-0.722034819446447	0.0536030771355796	0.725497437240675	no	THRAP3	PREDICTED: thyroid hormone receptor-associated protein 3-like isoform X2 [Sinocyclocheilus anshuiensis]	-	-	-	-
Unigene0000199	44	52	0.6430	0.5122	0.8962	0.5742	0.9563	0.5138	0.6838	0.681433333333333	-0.00500190201963753	1	1	no	XKR7	XK-related protein 7 [Danio rerio]	-	GO:0044425//membrane part;GO:0031224//intrinsic component of membrane;GO:0016020//membrane	-	-
Unigene0000200	57.3333333333333	81.6666666666667	1.1028	0.5560	1.1025	0.5842	1.6958	1.0064	0.920433333333333	1.09546666666667	0.251160449476492	0.650266951841298	1	no	LYPD6B	PREDICTED: ly6/PLAUR domain-containing protein 6B-like isoform X1 [Sinocyclocheilus anshuiensis]	-	-	-	-
Unigene0000201	5	5.33333333333333	0.0820	0.6100	0.3584	0.2787	0.1830	0.4589	0.350133333333333	0.306866666666667	-0.190292473668998	0.912723586932421	1	no	Ttc22	PREDICTED: LOW QUALITY PROTEIN: tetratricopeptide repeat protein 22-like [Cyprinus carpio]	-	-	-	-
Unigene0000202	10.6666666666667	13	1.0154	1.1154	0.5377	0.6272	0.8924	1.0328	0.8895	0.8508	-0.0641745721938498	0.949227801658078	1	no	-	--	-	-	-	-
Unigene0000203	13.6666666666667	16.6666666666667	0.9927	0.7097	1.0008	1.0377	0.9086	0.7475	0.901066666666667	0.897933333333333	-0.00502551309889537	1	1	no	-	--	-	-	-	-
Unigene0000204	13.3333333333333	21	0.3622	0.3928	1.1868	1.1075	0.7183	0.8442	0.647266666666667	0.89	0.459445127081071	0.515186899610695	1	no	-	--	-	-	-	-
Unigene0000205	2.66666666666667	3.66666666666667	0.2779	0.1292	0.1012	0.0944	0.1550	0.2915	0.169433333333333	0.1803	0.0896816667050561	0.999999999999998	1	no	-	PREDICTED: histone-lysine N-methyltransferase 2C-like isoform X19 [Salmo salar]	-	-	-	-
Unigene0000206	1195.33333333333	1066.33333333333	14.2193	15.2365	14.8016	9.6520	15.1696	7.5785	14.7524666666667	10.8000333333333	-0.449920433414308	0.206327428157559	0.931150988785418	no	optn	PREDICTED: optineurin [Sinocyclocheilus rhinocerous]	-	GO:0005623//cell;GO:0044464//cell part;GO:0005622//intracellular;GO:0044424//intracellular part	-	-
Unigene0000207	25	44.6666666666667	0.3682	1.8254	1.6535	1.2093	3.3317	1.3732	1.28236666666667	1.9714	0.620411700811278	0.359678098548314	0.99450037684732	no	sand	PREDICTED: vacuolar fusion protein MON1 homolog B-like [Sinocyclocheilus anshuiensis]	-	-	-	-
Unigene0000208	6.66666666666667	9	0.4657	0.9378	0.0565	0.4219	0.2886	0.7598	0.486666666666667	0.4901	0.0101421834761697	1	1	no	PCLO	PREDICTED: protein piccolo isoform X3 [Danio rerio]	-	-	-	-
Unigene0000209	6.66666666666667	7.33333333333333	0.3289	0.3822	0.6587	0.5588	0.5504	0.1725	0.4566	0.427233333333333	-0.0959066470909176	0.999999999999995	1	no	-	--	-	-	-	-
Unigene0000210	1290.66666666667	766.333333333333	29.3062	54.7550	19.5649	13.0262	23.6285	12.1578	34.5420333333333	16.2708333333333	-1.0860648677675	0.012136530623251	0.439307282874253	no	IRF1	interferon regulatory factor 1 [Carassius auratus]	-	-	GO:0097159//organic cyclic compound binding;GO:1901363//heterocyclic compound binding;GO:0005488//binding;GO:0003676//nucleic acid binding	-
Unigene0000211	22.6666666666667	14.6666666666667	1.7493	1.5356	2.3353	0.4623	0.7227	1.8348	1.8734	1.0066	-0.896168467324595	0.170496210649287	0.906464941542295	no	-	--	-	-	-	-
Unigene0000212	8.33333333333333	5.33333333333333	1.6330	0.3571	0.2798	0.3916	0.0000	0.6717	0.756633333333333	0.354433333333333	-1.09408004425841	0.310337846231017	0.981739320999878	no	-	--	-	-	-	-
Unigene0000213	9.66666666666667	11.6666666666667	0.8645	0.8036	0.7694	0.3916	1.0001	1.0075	0.8125	0.799733333333333	-0.0228487915429582	1	1	no	-	--	-	-	-	-
Unigene0000214	4.33333333333333	6	0.5994	0.2388	0.1871	0.4655	0.0637	0.5389	0.341766666666667	0.356033333333333	0.0590006243501778	1	1	no	-	--	-	-	-	-
Unigene0000215	3.66666666666667	12	0.2907	0.2702	0.3528	0.6584	0.9368	0.8808	0.304566666666667	0.825333333333333	1.43821885417551	0.0512973338002823	0.715643560222838	no	-	PREDICTED: low-density lipoprotein receptor class A domain-containing protein 4-like [Sinocyclocheilus grahami]	-	-	-	-
Unigene0000216	46	31	0.5120	1.4013	1.3878	0.5799	0.5923	0.6962	1.10036666666667	0.6228	-0.821143492435397	0.135046914513283	0.867276864806222	no	ERBB4	PREDICTED: receptor tyrosine-protein kinase erbB-4-like [Sinocyclocheilus grahami]	ko04020//Calcium signaling pathway//Signal transduction//Environmental Information Processing;ko04144//Endocytosis//Transport and catabolism//Cellular Processes;ko04012//ErbB signaling pathway//Signal transduction//Environmental Information Processing	-	GO:0016740//transferase activity;GO:0003824//catalytic activity;GO:0016772//transferase activity, transferring phosphorus-containing groups;GO:0004672//protein kinase activity;GO:0016773//phosphotransferase activity, alcohol group as acceptor;GO:1901363//heterocyclic compound binding;GO:0005488//binding;GO:0036094//small molecule binding;GO:0097159//organic cyclic compound binding;GO:0004713//pro…	GO:0006796//phosphate-containing compound metabolic process;GO:0006793//phosphorus metabolic process;GO:0044237//cellular metabolic process;GO:0008152//metabolic process;GO:0009987//cellular process
Unigene0000217	163	113.666666666667	2.6365	1.5881	2.0807	0.5404	2.4098	0.6900	2.10176666666667	1.2134	-0.792547296999279	0.1563093051422	0.893794458632738	no	-	PREDICTED: nesprin-1-like [Sinocyclocheilus rhinocerous]	-	-	-	-
Unigene0000218	20.3333333333333	9.66666666666667	1.2709	0.7269	0.6763	0.0996	0.6543	0.2734	0.891366666666667	0.342433333333333	-1.38019586709622	0.0531041048222964	0.722995243938544	no	EPS15	PREDICTED: extracellular matrix-binding protein ebh-like, partial [Sinocyclocheilus anshuiensis]	-	-	-	-
Unigene0000219	277.666666666667	195.666666666667	9.9015	5.5161	7.4146	2.1648	7.2705	3.7565	7.61073333333333	4.39726666666667	-0.791428445903278	0.0979797774080581	0.820067733403903	no	-	PREDICTED: extracellular matrix-binding protein ebh-like, partial [Sinocyclocheilus anshuiensis]	-	-	-	-
Unigene0000220	485.333333333333	809.333333333333	2.8237	3.0278	2.8735	2.8499	6.4225	2.7208	2.90833333333333	3.99773333333333	0.458989610488783	0.253857391167095	0.959659974638909	no	SORCS3	PREDICTED: VPS10 domain-containing receptor SorCS3-like [Sinocyclocheilus grahami]	-	-	-	-
Unigene0000221	31	40.6666666666667	0.7674	0.6464	0.5588	0.7658	0.5528	0.7378	0.657533333333333	0.685466666666667	0.0600224783830878	0.912090660074008	1	no	-	--	-	-	-	-
Unigene0000222	2583	2974.66666666667	10.7888	10.3621	12.1966	10.1430	11.7137	9.7012	11.1158333333333	10.5193	-0.0795774039629794	0.792268442227543	1	no	CCNT2	PREDICTED: cyclin-T2-like isoform X1 [Sinocyclocheilus rhinocerous]	-	-	-	GO:0010467//gene expression;GO:0051726//regulation of cell cycle;GO:0009058//biosynthetic process;GO:0090304//nucleic acid metabolic process;GO:0034645//cellular macromolecule biosynthetic process;GO:0044271//cellular nitrogen compound biosynthetic process;GO:0050789//regulation of biological process;GO:0019438//aromatic compound biosynthetic process;GO:0044260//cellular macromolecule metabolic p…
Unigene0000223	49.3333333333333	73.6666666666667	0.8865	1.1197	0.9269	1.1892	1.3861	0.9854	0.9777	1.1869	0.279734630665594	0.550325498388486	1	no	-	--	-	-	-	-
Unigene0000224	17.6666666666667	2	1.9437	2.8003	0.1415	0.3302	0.0723	0.0000	1.6285	0.134166666666667	-3.60144553211508	0.0016736683369541	0.17371185420915	no	-	--	-	-	-	-
Unigene0000225	8.33333333333333	1.33333333333333	0.9719	0.3613	0.7784	0.1321	0.0723	0.0680	0.703866666666667	0.0908	-2.95453796265856	0.00264083874287209	0.219350670921966	no	-	--	-	-	-	-
Unigene0000226	11.6666666666667	18.3333333333333	1.7195	0.2906	0.5122	0.3718	1.9181	0.8198	0.840766666666667	1.03656666666667	0.302035528250386	0.747574710644107	1	no	BTBD11	PREDICTED: ankyrin repeat and BTB/POZ domain-containing protein 2-like [Sinocyclocheilus rhinocerous]	-	-	-	-
Unigene0000227	17.6666666666667	6.66666666666667	2.1256	0.5388	1.7589	0.3283	0.2874	0.7431	1.47443333333333	0.452933333333333	-1.70278996964948	0.0269667589157486	0.591292396241323	no	-	PREDICTED: receptor tyrosine-protein kinase erbB-4-like, partial [Notothenia coriiceps]	ko03013//RNA transport//Translation//Genetic Information Processing	-	-	-
Unigene0000228	1697	1585.66666666667	15.4521	13.2918	9.5008	9.5454	6.3895	12.1329	12.7482333333333	9.35593333333333	-0.446343843623619	0.211279423785937	0.933389929647424	no	TINF2	PREDICTED: TERF1-interacting nuclear factor 2-like [Cyprinus carpio]	-	-	-	-
Unigene0000229	37.3333333333333	57	1.6738	2.1261	1.6656	1.7438	1.4107	3.5500	1.82183333333333	2.23483333333333	0.294776260679223	0.575627065239999	1	no	-	--	-	-	-	-
Unigene0000230	2.33333333333333	0.666666666666667	0.0000	0.2406	0.4713	0.1759	0.0000	0.0000	0.2373	0.0586333333333333	-2.01691911844314	0.350868363213927	0.991184679460046	no	-	--	-	-	-	-
Unigene0000231	23.3333333333333	16	2.1434	1.4559	1.5007	0.7842	1.0422	0.9799	1.7	0.935433333333333	-0.861828002425209	0.130981456921608	0.862851527917899	no	-	--	-	-	-	-
Unigene0000232	10.6666666666667	8.66666666666667	0.6214	0.3850	0.8547	0.3753	0.3594	0.5310	0.620366666666667	0.4219	-0.55622008249397	0.442308601543187	1	no	-	--	-	-	-	-
Unigene0000233	2884.33333333333	3346	21.1461	19.2157	22.6943	22.2832	18.4918	18.8848	21.0187	19.8866	-0.0798768012696165	0.791153472142433	1	no	FBXW5	PREDICTED: F-box/WD repeat-containing protein 5-like [Sinocyclocheilus grahami]	-	GO:0000151//ubiquitin ligase complex;GO:1902494//catalytic complex;GO:1990234//transferase complex;GO:0043234//protein complex;GO:0005623//cell;GO:0005622//intracellular;GO:0031461//cullin-RING ubiquitin ligase complex;GO:0044424//intracellular part;GO:0032991//macromolecular complex;GO:0044464//cell part	-	GO:0009057//macromolecule catabolic process;GO:0006511//ubiquitin-dependent protein catabolic process;GO:0016043//cellular component organization;GO:0044257//cellular protein catabolic process;GO:0043170//macromolecule metabolic process;GO:0044267//cellular protein metabolic process;GO:0044260//cellular macromolecule metabolic process;GO:0006508//proteolysis;GO:0007098//centrosome cycle;GO:002240…
Unigene0000234	605.666666666667	580.333333333333	2.3808	2.6464	2.0700	1.5091	1.9324	2.0374	2.36573333333333	1.8263	-0.373363690196725	0.278155012625272	0.970145516916271	no	nav3	PREDICTED: LOW QUALITY PROTEIN: neuron navigator 3 [Sinocyclocheilus grahami]	-	-	-	-
Unigene0000235	1	3.66666666666667	0.2021	0.0000	0.0736	0.5492	0.0751	0.1413	0.0919	0.2552	1.47349156247583	0.259609387684304	0.96039508244514	no	-	PREDICTED: vegetative cell wall protein gp1-like [Sinocyclocheilus rhinocerous]	-	-	-	-
Unigene0000236	9.66666666666667	10.3333333333333	1.1047	0.5476	0.3218	0.5004	0.3834	0.7209	0.658033333333333	0.5349	-0.298891463280489	0.738219278194894	1	no	-	--	-	-	-	-
Unigene0000237	27.6666666666667	24.3333333333333	0.7789	0.8325	1.1343	0.3969	1.3032	0.3540	0.915233333333333	0.6847	-0.418667584440357	0.510730919106997	1	no	-	--	-	-	-	-
Unigene0000238	114.333333333333	119.666666666667	2.3652	1.9683	3.6047	1.0278	4.5609	1.5577	2.64606666666667	2.38213333333333	-0.151595243908219	0.789070390256519	1	no	-	--	-	-	-	-
Unigene0000239	13.6666666666667	28	0.5034	0.5849	0.4276	0.6841	0.9671	0.8506	0.5053	0.833933333333333	0.722791875759985	0.199747975015857	0.927008617961952	no	Hfe2	PREDICTED: hemojuvelin-like [Sinocyclocheilus rhinocerous]	-	-	-	GO:0044707//single-multicellular organism process;GO:0032502//developmental process;GO:0048856//anatomical structure development;GO:0007275//multicellular organism development;GO:0009790//embryo development;GO:0048568//embryonic organ development;GO:0044699//single-organism process;GO:0048731//system development;GO:0032501//multicellular organismal process;GO:0048513//animal organ development;GO:…
Unigene0000240	227.666666666667	281	1.1066	4.0931	1.6033	1.6035	2.8634	2.3133	2.26766666666667	2.26006666666667	-0.00484325900006802	0.993907326914073	1	no	PAPSS2	PREDICTED: bifunctional 3'-phosphoadenosine 5'-phosphosulfate synthase 2-like [Sinocyclocheilus grahami]	ko01100//Metabolic pathways//Global and Overview//Metabolism;ko01130//Biosynthesis of antibiotics//Global and Overview//Metabolism;ko00230//Purine metabolism//Nucleotide metabolism//Metabolism;ko01120//Microbial metabolism in diverse environments//Global and Overview//Metabolism;ko00450//Selenocompound metabolism//Metabolism of other amino acids//Metabolism;ko00920//Sulfur metabolism//Energy meta…	-	GO:0001883//purine nucleoside binding;GO:0016740//transferase activity;GO:0032550//purine ribonucleoside binding;GO:0032549//ribonucleoside binding;GO:0016301//kinase activity;GO:0004779//sulfate adenylyltransferase activity;GO:0016779//nucleotidyltransferase activity;GO:0097367//carbohydrate derivative binding;GO:0097159//organic cyclic compound binding;GO:0036094//small molecule binding;GO:0005…	GO:0008152//metabolic process;GO:0044237//cellular metabolic process;GO:0009987//cellular process;GO:0006790//sulfur compound metabolic process
Unigene0000241	40.3333333333333	40.3333333333333	0.9848	0.5572	0.7327	0.5382	0.4935	0.7934	0.758233333333333	0.608366666666667	-0.317700773656679	0.537939714358299	1	no	CHRNA9	PREDICTED: neuronal acetylcholine receptor subunit alpha-9-II-like [Sinocyclocheilus anshuiensis]	ko04080//Neuroactive ligand-receptor interaction//Signaling molecules and interaction//Environmental Information Processing	GO:0097060//synaptic membrane;GO:0016020//membrane;GO:0005886//plasma membrane;GO:0045202//synapse;GO:0031224//intrinsic component of membrane;GO:0098805//whole membrane;GO:0098590//plasma membrane region;GO:0044456//synapse part;GO:0044464//cell part;GO:0071944//cell periphery;GO:0044459//plasma membrane part;GO:0005623//cell;GO:0098589//membrane region;GO:0044425//membrane part	GO:0005216//ion channel activity;GO:0022836//gated channel activity;GO:0022857//transmembrane transporter activity;GO:0022892//substrate-specific transporter activity;GO:0015276//ligand-gated ion channel activity;GO:0060089//molecular transducer activity;GO:0004872//receptor activity;GO:0022838//substrate-specific channel activity;GO:0022834//ligand-gated channel activity;GO:0099600//transmembran…	GO:0044763//single-organism cellular process;GO:0048562//embryonic organ morphogenesis;GO:0030003//cellular cation homeostasis;GO:0072503//cellular divalent inorganic cation homeostasis;GO:0007275//multicellular organism development;GO:0009790//embryo development;GO:0044699//single-organism process;GO:0055080//cation homeostasis;GO:0048513//animal organ development;GO:0098771//inorganic ion homeo…
Unigene0000242	100	122	1.2315	1.2315	1.5437	1.0062	2.1909	0.8938	1.33556666666667	1.36363333333333	0.0300037790798674	0.955494014600708	1	no	Jakmip3	PREDICTED: janus kinase and microtubule-interacting protein 3 isoform X2 [Sinocyclocheilus grahami]	-	-	-	-
Unigene0000243	48.6666666666667	54	1.5445	1.1679	0.7434	0.8360	1.2459	0.9335	1.15193333333333	1.00513333333333	-0.196670334032202	0.708716079753083	1	no	Gucy2e	PREDICTED: retinal guanylyl cyclase 2-like [Sinocyclocheilus grahami]	-	GO:0031224//intrinsic component of membrane;GO:0016020//membrane;GO:0044425//membrane part	GO:1901363//heterocyclic compound binding;GO:0016740//transferase activity;GO:0009975//cyclase activity;GO:0005488//binding;GO:0036094//small molecule binding;GO:0016829//lyase activity;GO:0097159//organic cyclic compound binding;GO:0003824//catalytic activity;GO:0016301//kinase activity;GO:0032550//purine ribonucleoside binding;GO:0032549//ribonucleoside binding;GO:0001883//purine nucleoside bin…	GO:0044763//single-organism cellular process;GO:1901360//organic cyclic compound metabolic process;GO:0034641//cellular nitrogen compound metabolic process;GO:0006793//phosphorus metabolic process;GO:0051716//cellular response to stimulus;GO:0009987//cellular process;GO:0009058//biosynthetic process;GO:0007154//cell communication;GO:0044711//single-organism biosynthetic process;GO:0046483//hetero…
Unigene0000244	12	9.66666666666667	1.0600	0.4667	0.3250	0.2275	0.5394	0.3901	0.617233333333333	0.385666666666667	-0.678461517321892	0.358517302396153	0.994162578408029	no	-	PREDICTED: fibroleukin-like [Cyprinus carpio]	-	-	-	-
Unigene0000245	7.33333333333333	13.3333333333333	0.2986	0.6244	0.4892	1.0650	0.3330	0.6785	0.470733333333333	0.692166666666667	0.556209449884967	0.480393707672337	1	no	-	--	-	-	-	-
Unigene0000246	25.6666666666667	37.6666666666667	2.1911	0.5940	3.0580	2.7915	2.9873	1.5321	1.9477	2.43696666666667	0.323315038366523	0.629587298631918	1	no	-	--	-	-	-	-
Unigene0000247	9	9	0.5099	0.5416	0.6364	0.5939	0.4333	0.3565	0.562633333333333	0.461233333333333	-0.286698247634807	0.738083761157342	1	no	-	--	-	-	-	-
Unigene0000248	847.333333333333	892.666666666667	12.3393	15.4942	12.4154	10.9205	11.5748	11.8080	13.4163	11.4344333333333	-0.230601983712754	0.482630649065531	1	no	RGP1	PREDICTED: RAB6A-GEF complex partner protein 2-like isoform X1 [Cyprinus carpio]	-	-	-	-
Unigene0000249	14	10.6666666666667	1.4331	0.9990	0.9131	0.6086	0.3997	1.0021	1.11506666666667	0.670133333333333	-0.734609891750047	0.268405014036872	0.967024046592093	no	Gripap1	PREDICTED: GRIP1-associated protein 1 [Astyanax mexicanus]	-	-	-	-
Unigene0000250	220.666666666667	375.666666666667	7.5616	5.7557	4.9849	11.1428	11.0614	2.6545	6.10073333333333	8.28623333333333	0.441733774964014	0.378749958926859	1	no	Cldn4	PREDICTED: claudin-4-like [Sinocyclocheilus anshuiensis]	ko04530//Tight junction//Cellular commiunity//Cellular Processes;ko04514//Cell adhesion molecules (CAMs)//Signaling molecules and interaction//Environmental Information Processing	GO:0031224//intrinsic component of membrane;GO:0005911//cell-cell junction;GO:0016020//membrane;GO:0030054//cell junction;GO:0043296//apical junction complex;GO:0044425//membrane part	-	GO:0044767//single-organism developmental process;GO:0044707//single-multicellular organism process;GO:0048731//system development;GO:0007275//multicellular organism development;GO:0044699//single-organism process;GO:0032502//developmental process;GO:0048856//anatomical structure development;GO:0048513//animal organ development;GO:0032501//multicellular organismal process;GO:0007423//sensory orga…
Unigene0000251	16.3333333333333	6.66666666666667	2.3239	0.2817	1.6921	0.6179	0.3757	0.4239	1.43256666666667	0.4725	-1.60021604410402	0.0512112228859405	0.715643560222838	no	-	--	-	-	-	-
Unigene0000252	9.33333333333333	14	0.4657	1.0099	0.4521	0.6856	1.3275	0.3256	0.642566666666667	0.779566666666667	0.278826261485116	0.772772768547339	1	no	-	PREDICTED: uncharacterized protein LOC101477648 [Maylandia zebra]	-	-	-	-
Unigene0000253	17.6666666666667	12	1.4440	1.6777	0.4206	0.5887	0.6443	0.6058	1.18076666666667	0.612933333333333	-0.945921828903876	0.161914236028425	0.898730181562041	no	-	--	-	-	-	-
Unigene0000254	1537	1772.33333333333	38.1574	34.2487	38.9675	40.2070	36.7088	27.7329	37.1245333333333	34.8829	-0.0898529069412778	0.77939584410732	1	no	cript	PREDICTED: cysteine-rich PDZ-binding protein [Sinocyclocheilus grahami]	-	GO:0005622//intracellular;GO:0044464//cell part;GO:0044424//intracellular part;GO:0005623//cell	-	-
Unigene0000255	59.6666666666667	55.3333333333333	1.7687	1.9036	3.2876	1.3283	3.0807	1.1391	2.31996666666667	1.84936666666667	-0.327072786244894	0.550629358342237	1	no	-	--	-	-	-	-
Unigene0000256	25.6666666666667	10.6666666666667	1.4514	1.4053	1.2330	0.5753	0.4497	0.3383	1.36323333333333	0.454433333333333	-1.58489194983646	0.00645057725432023	0.335993311055878	no	-	--	-	-	-	-
Unigene0000257	16.6666666666667	5.66666666666667	1.8198	1.5134	0.9764	0.3905	0.4274	0.3349	1.43653333333333	0.384266666666667	-1.90241172966434	0.00558056035590507	0.316999426512919	no	-	--	-	-	-	-
Unigene0000258	29	29	1.3137	1.2999	0.7097	1.0366	1.2291	0.3556	1.10776666666667	0.873766666666667	-0.342334058190137	0.578839717005798	1	no	Adm2	PREDICTED: ADM2-like [Sinocyclocheilus rhinocerous]	-	-	-	-
Unigene0000259	19	9	1.5307	1.7785	0.6688	0.7281	0.0000	0.6957	1.326	0.4746	-1.482296769806	0.0833643799454822	0.796946802319256	no	-	--	-	-	-	-
Unigene0000260	1480	1773.66666666667	13.7511	16.0356	16.4569	15.1434	14.1138	16.0646	15.4145333333333	15.1072666666667	-0.0290485536614911	0.926373584952461	1	no	slc30a5	PREDICTED: zinc transporter 5-like [Sinocyclocheilus rhinocerous]	-	GO:0044425//membrane part;GO:0031224//intrinsic component of membrane;GO:0043226//organelle;GO:0043229//intracellular organelle;GO:0005623//cell;GO:0044424//intracellular part;GO:0044464//cell part;GO:0043227//membrane-bounded organelle;GO:0016020//membrane;GO:0005622//intracellular;GO:0043231//intracellular membrane-bounded organelle	GO:0022890//inorganic cation transmembrane transporter activity;GO:0046915//transition metal ion transmembrane transporter activity;GO:0015075//ion transmembrane transporter activity;GO:0022857//transmembrane transporter activity;GO:0022892//substrate-specific transporter activity;GO:0046873//metal ion transmembrane transporter activity;GO:0022891//substrate-specific transmembrane transporter act…	GO:0006811//ion transport;GO:0044699//single-organism process;GO:0006829//zinc II ion transport;GO:0070838//divalent metal ion transport;GO:0006810//transport;GO:0030001//metal ion transport;GO:0051179//localization;GO:0006812//cation transport;GO:0044763//single-organism cellular process;GO:0009987//cellular process;GO:0072511//divalent inorganic cation transport;GO:1902578//single-organism loca…
Unigene0000261	7.66666666666667	3.66666666666667	0.3652	1.2729	0.2659	0.1241	0.2716	0.3192	0.634666666666667	0.2383	-1.41322012128388	0.153557780212919	0.889406564904576	no	fxyd2	PREDICTED: sodium/potassium-transporting ATPase subunit gamma-like [Sinocyclocheilus anshuiensis]	-	-	-	-
Unigene0000262	165.666666666667	134.333333333333	1.5798	2.0514	1.4464	1.2392	0.9329	1.1209	1.69253333333333	1.09766666666667	-0.624744235800063	0.126528565282994	0.858282961805973	no	Unc13b	PREDICTED: protein unc-13 homolog B-like isoform X2 [Cyprinus carpio]	-	-	-	-
Unigene0000263	91.3333333333333	103	4.6127	5.1448	6.7692	4.9183	5.9106	4.7139	5.5089	5.18093333333333	-0.0885522551508467	0.841495426254874	1	no	-	--	-	-	-	-
Unigene0000264	37	51.6666666666667	0.7562	0.5574	1.1202	0.8504	1.2992	0.7293	0.811266666666667	0.959633333333333	0.242307059069057	0.664065757639207	1	no	CYP21A2	PREDICTED: steroid 21-hydroxylase-like [Sinocyclocheilus anshuiensis]	ko01100//Metabolic pathways//Global and Overview//Metabolism;ko00140//Steroid hormone biosynthesis//Lipid metabolism//Metabolism	-	GO:0046914//transition metal ion binding;GO:1901363//heterocyclic compound binding;GO:0043169//cation binding;GO:0097159//organic cyclic compound binding;GO:0003824//catalytic activity;GO:0016491//oxidoreductase activity;GO:0046906//tetrapyrrole binding;GO:0046872//metal ion binding;GO:0043167//ion binding;GO:0005488//binding	GO:0044710//single-organism metabolic process;GO:0044699//single-organism process;GO:0008152//metabolic process
Unigene0000265	44	48.3333333333333	1.2003	0.9252	1.2151	0.6167	1.2410	1.1668	1.11353333333333	1.00816666666667	-0.143410585510237	0.784804475077122	1	no	adprhl1	PREDICTED: protein ADP-ribosylarginine hydrolase-like protein 1 [Sinocyclocheilus anshuiensis]	-	-	GO:0005488//binding;GO:0043169//cation binding;GO:0043167//ion binding;GO:0046872//metal ion binding;GO:0016799//hydrolase activity, hydrolyzing N-glycosyl compounds;GO:0003824//catalytic activity;GO:0016798//hydrolase activity, acting on glycosyl bonds;GO:0016787//hydrolase activity	GO:0006464//cellular protein modification process;GO:0044260//cellular macromolecule metabolic process;GO:0044237//cellular metabolic process;GO:0009987//cellular process;GO:0043412//macromolecule modification;GO:0019538//protein metabolic process;GO:0071704//organic substance metabolic process;GO:0044238//primary metabolic process;GO:0036211//protein modification process;GO:0008152//metabolic pr…
Unigene0000266	8.66666666666667	9.66666666666667	1.1978	1.1134	0.1454	0.4070	0.6681	0.9772	0.818866666666667	0.6841	-0.259421331736025	0.798652980415757	1	no	-	--	-	-	-	-
Unigene0000267	103.333333333333	69.6666666666667	6.1212	4.1338	3.0991	2.3071	2.7028	2.0732	4.45136666666667	2.36103333333333	-0.914829933096034	0.047112748565453	0.698449145348333	no	-	--	-	-	-	-
Unigene0000268	13.3333333333333	9.33333333333333	1.3082	0.9727	0.8256	0.8889	0.2594	0.5488	1.0355	0.5657	-0.8722184774641	0.228444992607109	0.9450396184942	no	-	--	-	-	-	-
Unigene0000269	27.3333333333333	25	1.0943	1.3803	2.7888	0.8497	1.4531	1.8582	1.75446666666667	1.387	-0.339064750394026	0.561291095076892	1	no	-	--	-	-	-	-
Unigene0000270	224.333333333333	327.333333333333	1.8218	1.3074	1.8017	2.4412	1.8526	1.5642	1.64363333333333	1.95266666666667	0.248557198331405	0.520294059538617	1	no	Kirrel	PREDICTED: kin of IRRE-like protein 1 isoform X1 [Sinocyclocheilus rhinocerous]	-	-	-	GO:0044707//single-multicellular organism process;GO:0072010//glomerular epithelium development;GO:0072001//renal system development;GO:0016043//cellular component organization;GO:0048731//system development;GO:0044767//single-organism developmental process;GO:0048513//animal organ development;GO:0032501//multicellular organismal process;GO:0072073//kidney epithelium development;GO:0044763//singl…
Unigene0000271	1086.33333333333	1217	23.0117	19.8527	9.8596	16.2034	4.6780	24.2908	17.5746666666667	15.0574	-0.223024648750997	0.660815742289982	1	no	Pim1	PREDICTED: serine/threonine-protein kinase pim-2-like [Sinocyclocheilus rhinocerous]	-	-	-	-
Unigene0000272	1674.66666666667	1978.33333333333	23.1910	23.2968	31.4027	24.6069	32.9911	19.1408	25.9635	25.5796	-0.0214911741089874	0.949554591686957	1	no	UMPS	PREDICTED: uridine 5'-monophosphate synthase [Sinocyclocheilus rhinocerous]	ko01100//Metabolic pathways//Global and Overview//Metabolism;ko00240//Pyrimidine metabolism//Nucleotide metabolism//Metabolism;ko00983//Drug metabolism - other enzymes//Xenobiotics biodegradation and metabolism//Metabolism	-	GO:0016757//transferase activity, transferring glycosyl groups;GO:0016830//carbon-carbon lyase activity;GO:0016740//transferase activity;GO:0016831//carboxy-lyase activity;GO:0016763//transferase activity, transferring pentosyl groups;GO:0003824//catalytic activity;GO:0016829//lyase activity	GO:0019637//organophosphate metabolic process;GO:0006220//pyrimidine nucleotide metabolic process;GO:0019438//aromatic compound biosynthetic process;GO:0044281//small molecule metabolic process;GO:0044763//single-organism cellular process;GO:0042455//ribonucleoside biosynthetic process;GO:0008152//metabolic process;GO:0046390//ribose phosphate biosynthetic process;GO:0006221//pyrimidine nucleotid…
Unigene0000273	15.3333333333333	22.3333333333333	0.6287	0.9183	1.8311	1.5256	1.0018	1.6955	1.12603333333333	1.40763333333333	0.322022047871076	0.628723140407282	1	no	-	--	-	-	-	-
Unigene0000274	12	12.3333333333333	0.5603	0.2604	0.4372	0.1904	0.7739	0.1119	0.4193	0.358733333333333	-0.225071024112773	0.800542210483249	1	no	UCN3	PREDICTED: urocortin-3-like [Sinocyclocheilus rhinocerous]	ko04080//Neuroactive ligand-receptor interaction//Signaling molecules and interaction//Environmental Information Processing	GO:0044421//extracellular region part;GO:0005576//extracellular region	-	GO:0032501//multicellular organismal process;GO:0044699//single-organism process;GO:0050896//response to stimulus;GO:0044707//single-multicellular organism process
Unigene0000275	1127.33333333333	956.666666666667	10.8496	9.3357	9.8976	8.4183	2.9119	9.0622	10.0276333333333	6.79746666666667	-0.56091207249517	0.17714528334065	0.912363804463784	no	DNAJB5	PREDICTED: dnaJ homolog subfamily B member 5-like isoform X1 [Sinocyclocheilus rhinocerous]	-	-	GO:0005488//binding;GO:0005515//protein binding	-
Unigene0000276	83	44.6666666666667	5.0164	1.0228	1.4140	1.6053	1.2997	0.1584	2.4844	1.02113333333333	-1.28272621610399	0.0911425752094133	0.812409838180835	no	-	PREDICTED: uncharacterized protein LOC109202850 [Oreochromis niloticus]	-	-	-	-
Unigene0000277	11.6666666666667	8	0.8192	0.2077	1.1388	0.0000	0.8307	0.4687	0.7219	0.433133333333333	-0.736987799552358	0.455007617139558	1	no	-	--	-	-	-	-
Unigene0000278	47.6666666666667	49.6666666666667	1.3521	0.8871	1.0811	0.0901	1.9519	0.8342	1.10676666666667	0.958733333333333	-0.207149600905394	0.79233286147196	1	no	-	--	-	-	-	-
Unigene0000279	812.333333333333	781.333333333333	16.3719	13.3944	16.6867	12.7114	10.7659	12.9113	15.4843333333333	12.1295333333333	-0.35228522429629	0.289939138602672	0.976313694191293	no	Mrgbp	PREDICTED: MRG/MORF4L-binding protein isoform X1 [Danio rerio]	-	GO:0031248//protein acetyltransferase complex;GO:0044424//intracellular part;GO:0005623//cell;GO:0043231//intracellular membrane-bounded organelle;GO:1990234//transferase complex;GO:0044428//nuclear part;GO:0070013//intracellular organelle lumen;GO:0005622//intracellular;GO:0005634//nucleus;GO:1902493//acetyltransferase complex;GO:0005654//nucleoplasm;GO:0031974//membrane-enclosed lumen;GO:004322…	-	GO:0032774//RNA biosynthetic process;GO:0009058//biosynthetic process;GO:0034645//cellular macromolecule biosynthetic process;GO:0044260//cellular macromolecule metabolic process;GO:0046483//heterocycle metabolic process;GO:0008152//metabolic process;GO:0006351//transcription, DNA-templated;GO:0016070//RNA metabolic process;GO:0018130//heterocycle biosynthetic process;GO:0034641//cellular nitroge…
Unigene0000280	38	10.6666666666667	0.3996	1.9499	0.2546	0.1358	0.1486	0.2794	0.868033333333333	0.187933333333333	-2.20752946745416	0.00496688983353108	0.299495612331264	no	F2RL2	PREDICTED: proteinase-activated receptor 3 [Danio rerio]	ko04080//Neuroactive ligand-receptor interaction//Signaling molecules and interaction//Environmental Information Processing	GO:0044425//membrane part;GO:0031224//intrinsic component of membrane;GO:0016020//membrane	GO:0016787//hydrolase activity;GO:0004871//signal transducer activity;GO:0008528//G-protein coupled peptide receptor activity;GO:0060089//molecular transducer activity;GO:0004930//G-protein coupled receptor activity;GO:0001653//peptide receptor activity;GO:0003824//catalytic activity;GO:0099600//transmembrane receptor activity;GO:0004888//transmembrane signaling receptor activity;GO:0004872//rece…	GO:0007186//G-protein coupled receptor signaling pathway;GO:0050789//regulation of biological process;GO:0008152//metabolic process;GO:0051604//protein maturation;GO:0051716//cellular response to stimulus;GO:0007165//signal transduction;GO:0007154//cell communication;GO:0044700//single organism signaling;GO:0010467//gene expression;GO:0043170//macromolecule metabolic process;GO:0050794//regulatio…
Unigene0000281	4.33333333333333	7	0.2345	0.3632	0.2846	0.1062	0.5231	0.5465	0.2941	0.391933333333333	0.414301492950038	0.673698178063241	1	no	drl	PREDICTED: gastrula zinc finger protein XlCGF8.2DB-like [Sinocyclocheilus grahami]	-	-	-	-
Unigene0000282	8	6.33333333333333	0.0000	1.1509	0.3713	0.3959	0.3792	0.2037	0.5074	0.326266666666667	-0.637071918705704	0.577320288613691	1	no	-	--	-	-	-	-
Unigene0000283	111.333333333333	173.333333333333	0.4883	0.7710	0.6673	0.7227	0.9950	0.7531	0.6422	0.8236	0.358921164906484	0.393782161370958	1	no	HMCN1	PREDICTED: hemicentin-1-like [Sinocyclocheilus rhinocerous]	-	-	-	GO:0048856//anatomical structure development;GO:0032502//developmental process;GO:0007275//multicellular organism development;GO:0033333//fin development;GO:0044767//single-organism developmental process;GO:0044699//single-organism process;GO:0044707//single-multicellular organism process;GO:0032501//multicellular organismal process;GO:0048736//appendage development
Unigene0000284	335.333333333333	285.666666666667	7.8431	6.6420	7.3247	4.9570	5.3697	4.7703	7.26993333333333	5.03233333333333	-0.53071464733257	0.137878727997143	0.871435496249829	no	-	--	-	-	-	-
Unigene0000285	14.6666666666667	16.3333333333333	1.2689	1.1794	0.5435	0.9129	0.4441	1.2004	0.997266666666667	0.852466666666667	-0.226335906663512	0.735014211683582	1	no	-	--	-	-	-	-
Unigene0000286	160	211	2.9177	3.0965	3.0600	3.3585	4.2425	2.1924	3.02473333333333	3.26446666666667	0.110039353185642	0.792485875583471	1	no	-	--	-	-	-	-
Unigene0000287	10	9.33333333333333	1.1527	0.3348	0.4721	0.1958	0.2143	1.0075	0.6532	0.472533333333333	-0.467108687727834	0.634048418887329	1	no	-	--	-	-	-	-
Unigene0000288	8.33333333333333	5.33333333333333	0.7108	0.2477	0.9057	0.2415	0.2643	0.4970	0.6214	0.334266666666667	-0.894522746009056	0.26899588981039	0.967024046592093	no	-	--	-	-	-	-
Unigene0000289	316.666666666667	246.333333333333	4.5348	4.4942	3.5645	2.1528	3.8302	1.9424	4.19783333333333	2.6418	-0.668123638306436	0.0981040237044945	0.82033404575839	no	-	--	-	-	-	-
Unigene0000290	7.33333333333333	19	0.1534	0.6417	0.6145	0.6776	1.1410	1.2874	0.469866666666667	1.03533333333333	1.13977200035424	0.113627984085851	0.842321801616697	no	-	--	-	-	-	-
Unigene0000291	1058	1110.33333333333	5.2589	6.6090	5.5490	4.4891	5.7047	4.6856	5.80563333333333	4.9598	-0.227171512228801	0.487544671459794	1	no	GK	PREDICTED: glycerol kinase-like isoform X5 [Sinocyclocheilus anshuiensis]	ko01100//Metabolic pathways//Global and Overview//Metabolism;ko03320//PPAR signaling pathway//Endocrine system//Organismal Systems;ko00561//Glycerolipid metabolism//Lipid metabolism//Metabolism	-	-	-
Unigene0000292	12.6666666666667	10.6666666666667	1.7229	0.7536	0.9594	0.4132	0.9798	0.9212	1.1453	0.7714	-0.570174496432744	0.426930407399592	1	no	-	--	-	-	-	-
Unigene0000293	288.333333333333	383.333333333333	1.4589	2.0565	1.6816	1.6725	2.2624	1.7115	1.73233333333333	1.88213333333333	0.11965227622446	0.7486638621982	1	no	TTLL7	PREDICTED: tubulin polyglutamylase TTLL7 [Sinocyclocheilus rhinocerous]	-	-	-	GO:0018193//peptidyl-amino acid modification;GO:0043412//macromolecule modification;GO:0044238//primary metabolic process;GO:0009987//cellular process;GO:0008152//metabolic process;GO:0071704//organic substance metabolic process;GO:0044260//cellular macromolecule metabolic process;GO:0019538//protein metabolic process;GO:0043170//macromolecule metabolic process;GO:0018200//peptidyl-glutamic acid …
Unigene0000294	6.33333333333333	6	0.7628	0.0000	0.6172	0.0000	0.3152	0.7704	0.46	0.361866666666667	-0.346175641134038	0.786856225932003	1	no	-	--	-	-	-	-
Unigene0000295	50.3333333333333	50.6666666666667	2.3719	3.1844	3.0224	2.5070	1.9109	2.6259	2.85956666666667	2.34793333333333	-0.284405094798483	0.565872372687635	1	no	-	PREDICTED: SH3 domain-containing protein C23A1.17-like [Sinocyclocheilus anshuiensis]	-	-	-	-
Unigene0000296	49	59.6666666666667	5.8185	6.2312	4.4210	5.1568	7.1490	3.8031	5.49023333333333	5.36963333333333	-0.0320438878504399	0.970746129207612	1	no	-	--	-	-	-	-
Unigene0000297	29.6666666666667	72	2.7072	1.6486	2.7870	3.3619	6.9423	4.1123	2.38093333333333	4.8055	1.01315932215315	0.0519392989672119	0.71890750233552	no	Wfdc3	PREDICTED: WAP four-disulfide core domain protein 3-like [Sinocyclocheilus anshuiensis]	-	-	-	-
Unigene0000298	560.333333333333	713.666666666667	7.5987	6.0686	9.2527	9.6321	7.8946	6.5633	7.64	8.03	0.0718273494815657	0.84184300788643	1	no	Rpp40	PREDICTED: ribonuclease P protein subunit p40-like [Sinocyclocheilus rhinocerous]	ko03013//RNA transport//Translation//Genetic Information Processing;ko03008//Ribosome biogenesis in eukaryotes//Translation//Genetic Information Processing	-	-	-
Unigene0000299	144.666666666667	176.666666666667	1.1103	1.8239	1.8425	1.2983	2.0162	1.5527	1.59223333333333	1.6224	0.0270777867883589	0.959542858639187	1	no	-	PREDICTED: CCR4-NOT transcription complex subunit 6-like isoform X4 [Sinocyclocheilus grahami]	-	-	-	-
Unigene0000300	8.33333333333333	25.3333333333333	0.1848	0.9733	0.2243	0.4186	1.9698	0.9906	0.4608	1.12633333333333	1.28942122788769	0.114293492142734	0.844249002763965	no	-	PREDICTED: uncharacterized protein LOC101885994 [Danio rerio]	-	-	-	-
Unigene0000301	206.333333333333	316	13.8800	11.4515	16.0687	20.6108	13.9753	17.3385	13.8000666666667	17.3082	0.326780460094574	0.395219366643322	1	no	-	--	-	-	-	-
Unigene0000302	15.6666666666667	16.3333333333333	0.7707	1.1939	1.4342	0.6982	1.1463	1.1377	1.13293333333333	0.994066666666667	-0.188648455392898	0.757014116247423	1	no	-	PREDICTED: RNA-directed DNA polymerase from mobile element jockey-like [Danio rerio]	-	-	-	-
Unigene0000303	93.6666666666667	87.3333333333333	0.8952	0.5332	0.7088	0.3189	0.7756	0.5348	0.7124	0.5431	-0.391469653177418	0.420663616321018	1	no	LRFN2	PREDICTED: leucine-rich repeat and fibronectin type-III domain-containing protein 2-like [Sinocyclocheilus grahami]	-	-	-	-
Unigene0000304	171.666666666667	143.666666666667	12.2809	11.3309	16.0438	9.2036	11.6175	6.8192	13.2185333333333	9.21343333333333	-0.520751337333873	0.211990778628618	0.933389929647424	no	-	--	-	-	-	-
Unigene0000305	2934.33333333333	3098.33333333333	21.8500	21.2928	21.2565	18.6767	19.6100	16.9403	21.4664333333333	18.409	-0.221671246255891	0.456448331403594	1	no	GANAB	PREDICTED: neutral alpha-glucosidase AB-like isoform X1 [Sinocyclocheilus grahami]	ko01100//Metabolic pathways//Global and Overview//Metabolism;ko04141//Protein processing in endoplasmic reticulum//Folding, sorting and degradation//Genetic Information Processing;ko00510//N-Glycan biosynthesis//Glycan biosynthesis and metabolism//Metabolism	-	-	-
Unigene0000306	572.666666666667	672.666666666667	12.9790	13.0099	15.7307	13.1036	15.0143	12.2980	13.9065333333333	13.4719666666667	-0.045802351004077	0.893269170001145	1	no	-	PREDICTED: TBC1 domain family member 5-like [Sinocyclocheilus grahami]	-	-	GO:0030234//enzyme regulator activity;GO:0005096//GTPase activator activity;GO:0008047//enzyme activator activity;GO:0030695//GTPase regulator activity;GO:0060589//nucleoside-triphosphatase regulator activity;GO:0098772//molecular function regulator	-
Unigene0000307	4	4.66666666666667	0.0000	0.2421	0.3793	0.4424	0.0968	0.0911	0.207133333333333	0.2101	0.0205164212723638	1	1	no	-	--	-	-	-	-
Unigene0000308	648.333333333333	584.666666666667	4.7420	3.1715	3.5752	2.7840	1.7183	3.7572	3.82956666666667	2.75316666666667	-0.476089205639572	0.219227848344669	0.940085376296015	no	nphp3	PREDICTED: nephrocystin-3-like [Sinocyclocheilus anshuiensis]	-	-	-	GO:0044767//single-organism developmental process;GO:0048568//embryonic organ development;GO:0048856//anatomical structure development;GO:0032501//multicellular organismal process;GO:0009888//tissue development;GO:0002009//morphogenesis of an epithelium;GO:0009887//organ morphogenesis;GO:0060429//epithelium development;GO:0060562//epithelial tube morphogenesis;GO:0072359//circulatory system devel…
Unigene0000309	5.66666666666667	12	0.5052	0.9391	0.1471	0.9611	0.6762	0.9184	0.530466666666667	0.8519	0.683421991835544	0.40478405188996	1	no	-	--	-	-	-	-
Unigene0000310	25.6666666666667	2.33333333333333	3.9956	1.2380	0.5134	0.0000	0.3496	0.0548	1.91566666666667	0.1348	-3.82895414681976	0.000169402890829929	0.0435755897089086	yes	-	Retrovirus-related Pol polyprotein LINE-1 [Larimichthys crocea]	-	-	-	-
Unigene0000311	10.6666666666667	22.3333333333333	0.9030	1.0072	0.6575	1.4726	1.4774	1.3259	0.8559	1.4253	0.735751459829124	0.216147201094808	0.937041439026495	no	PEG10	PREDICTED: C-Jun-amino-terminal kinase-interacting protein 1-like [Cyprinus carpio]	-	-	-	-
Unigene0000312	947.666666666667	1320	8.0123	8.2455	8.6226	8.8219	9.9182	9.5728	8.29346666666667	9.43763333333333	0.186449847725284	0.558398106555654	1	no	samhd1	PREDICTED: deoxynucleoside triphosphate triphosphohydrolase SAMHD1 isoform X1 [Sinocyclocheilus rhinocerous]	-	GO:0005622//intracellular;GO:0043227//membrane-bounded organelle;GO:0005623//cell;GO:0044424//intracellular part;GO:0043231//intracellular membrane-bounded organelle;GO:0043226//organelle;GO:0043229//intracellular organelle;GO:0044464//cell part	GO:0042578//phosphoric ester hydrolase activity;GO:0032560//guanyl deoxyribonucleotide binding;GO:0046872//metal ion binding;GO:0017076//purine nucleotide binding;GO:0097159//organic cyclic compound binding;GO:0016787//hydrolase activity;GO:0005488//binding;GO:0043167//ion binding;GO:0046914//transition metal ion binding;GO:0003676//nucleic acid binding;GO:1901265//nucleoside phosphate binding;GO…	GO:0009166//nucleotide catabolic process;GO:0046386//deoxyribose phosphate catabolic process;GO:1901564//organonitrogen compound metabolic process;GO:0019637//organophosphate metabolic process;GO:0072521//purine-containing compound metabolic process;GO:0046483//heterocycle metabolic process;GO:0009394//2'-deoxyribonucleotide metabolic process;GO:0006163//purine nucleotide metabolic process;GO:190…
Unigene0000313	7.66666666666667	8	0.4431	0.5765	0.7097	0.2408	0.5272	0.7435	0.576433333333333	0.503833333333333	-0.194207191326406	0.863562633029578	1	no	-	--	-	-	-	-
Unigene0000314	15.6666666666667	14.6666666666667	0.5958	1.4536	0.9761	1.0121	0.4984	0.7811	1.0085	0.763866666666667	-0.400818341789281	0.537818894223708	1	no	-	--	-	-	-	-
Unigene0000315	8.66666666666667	7.66666666666667	0.8698	0.0000	1.0134	0.5910	0.0000	0.7907	0.627733333333333	0.460566666666667	-0.4467418192385	0.740550173679879	1	no	-	--	-	-	-	-
Unigene0000316	23	31.3333333333333	2.6095	1.3744	1.3934	2.4232	2.0053	1.3380	1.79243333333333	1.92216666666667	0.100813973106001	0.871296956705628	1	no	-	--	-	-	-	-
Unigene0000317	66.3333333333333	64.6666666666667	3.0784	2.8612	2.4867	2.8761	1.5023	2.1525	2.80876666666667	2.17696666666667	-0.367617462697241	0.438196114127999	1	no	-	--	-	-	-	-
Unigene0000318	0.333333333333333	1	0.1369	0.0000	0.0000	0.0000	0.0000	0.2873	0.0456333333333333	0.0957666666666667	1.06943554627463	0.702522093381474	1	no	-	--	-	-	-	-
Unigene0000319	36	72.6666666666667	0.7518	1.1460	0.9197	1.3078	1.5431	1.7874	0.939166666666667	1.5461	0.719180524488356	0.132793272813811	0.865123746764425	no	-	PREDICTED: ATP-binding cassette sub-family G member 2-like [Sinocyclocheilus rhinocerous]	-	-	-	-
Unigene0000320	44	50.3333333333333	1.3082	2.6851	2.1829	0.7407	4.9858	0.3049	2.05873333333333	2.01046666666667	-0.0342265539281988	0.969206218052617	1	no	-	--	-	-	-	-
Unigene0000321	10	16.6666666666667	1.2307	0.5719	0.5761	0.7168	1.5036	0.9220	0.7929	1.04746666666667	0.401693503230816	0.568526295869297	1	no	TY3B-I	PREDICTED: adhesion G protein-coupled receptor E1-like [Danio rerio]	ko03013//RNA transport//Translation//Genetic Information Processing	-	-	-
Unigene0000322	77.3333333333333	43.6666666666667	1.5850	1.1097	1.4539	0.2657	1.2246	0.4606	1.38286666666667	0.6503	-1.08848473243351	0.0594640181191353	0.747164033981584	no	IFIT1	PREDICTED: interferon-induced protein with tetratricopeptide repeats 5-like [Cyprinus carpio]	-	-	-	-
Unigene0000323	14.3333333333333	10.6666666666667	1.0855	0.1187	1.1159	0.3037	0.1899	0.9376	0.773366666666667	0.477066666666667	-0.696961696641303	0.423933437193862	1	no	-	--	-	-	-	-
Unigene0000324	136.333333333333	156.333333333333	2.2720	2.9443	2.5452	2.2563	2.8918	2.1233	2.58716666666667	2.4238	-0.0941023365503853	0.818170903976399	1	no	FAM46A	PREDICTED: protein FAM46A-like [Sinocyclocheilus rhinocerous]	-	-	-	-
Unigene0000325	3713.66666666667	4789.66666666667	34.2398	35.4851	38.2803	44.7238	37.5352	31.4013	36.0017333333333	37.8867666666667	0.0736276546086183	0.8089456956568	1	no	stk3	PREDICTED: serine/threonine-protein kinase 3 [Sinocyclocheilus rhinocerous]	ko04010//MAPK signaling pathway//Signal transduction//Environmental Information Processing	GO:0044424//intracellular part;GO:0005622//intracellular;GO:0005623//cell;GO:0043226//organelle;GO:0043229//intracellular organelle;GO:0043227//membrane-bounded organelle;GO:0043231//intracellular membrane-bounded organelle;GO:0044464//cell part	GO:0016301//kinase activity;GO:0016773//phosphotransferase activity, alcohol group as acceptor;GO:0004672//protein kinase activity;GO:0005488//binding;GO:0001883//purine nucleoside binding;GO:0043169//cation binding;GO:0001882//nucleoside binding;GO:0032550//purine ribonucleoside binding;GO:1901363//heterocyclic compound binding;GO:0003824//catalytic activity;GO:0016740//transferase activity;GO:0…	GO:0012501//programmed cell death;GO:0008219//cell death;GO:0009987//cellular process;GO:0016265//death;GO:0051716//cellular response to stimulus;GO:0044699//single-organism process;GO:0006796//phosphate-containing compound metabolic process;GO:0023052//signaling;GO:0044237//cellular metabolic process;GO:0007154//cell communication;GO:0050789//regulation of biological process;GO:0044763//single-o…
Unigene0000326	2.66666666666667	10	0.5644	0.0000	0.0587	0.7123	0.8995	0.1128	0.2077	0.574866666666667	1.46872616310095	0.222875903752751	0.941935851582344	no	-	--	-	-	-	-
Unigene0000327	0	0.333333333333333	0.0000	0.0000	0.0000	0.0573	0.0000	0.0000	0.001	0.0191	4.25550073314839	0.999999999999993	1	no	-	--	-	-	-	-
Unigene0000328	1578.66666666667	1936.33333333333	7.7953	7.9836	8.0565	9.6366	4.8446	9.0696	7.94513333333333	7.85026666666667	-0.0173297688205595	0.96089552791466	1	no	Akna	PREDICTED: AT-hook-containing transcription factor-like isoform X2 [Sinocyclocheilus grahami]	-	-	-	-
Unigene0000329	72.3333333333333	58.6666666666667	1.0539	1.5674	1.7054	0.9230	0.9579	1.0317	1.44223333333333	0.970866666666667	-0.570959508703984	0.215153191022412	0.936907417841774	no	-	--	-	-	-	-
Unigene0000330	203.666666666667	222.666666666667	8.0383	8.6948	8.2492	8.9434	7.1314	6.0479	8.32743333333333	7.37423333333333	-0.175378832720027	0.652089835380579	1	no	-	--	-	-	-	-
Unigene0000331	131	108.333333333333	1.8442	1.1084	1.7569	0.5653	1.3921	1.2604	1.56983333333333	1.0726	-0.549499240173271	0.245175985741653	0.954604247972347	no	TC2N	PREDICTED: tandem C2 domains nuclear protein-like [Sinocyclocheilus rhinocerous]	-	-	-	-
Unigene0000332	6.33333333333333	6.33333333333333	0.1556	0.2169	0.7931	0.5286	0.1157	0.3808	0.388533333333333	0.3417	-0.185308128914087	0.928374698313672	1	no	-	--	-	-	-	-
Unigene0000333	85.3333333333333	85.6666666666667	0.7881	0.6715	1.3486	0.3927	1.2894	0.7439	0.936066666666667	0.808666666666667	-0.211066137581864	0.688992995012739	1	no	Adgra1	PREDICTED: adhesion G protein-coupled receptor A1 [Danio rerio]	-	-	-	-
Unigene0000334	5.66666666666667	5.33333333333333	0.4959	0.3073	0.4212	0.4492	0.3073	0.1734	0.408133333333333	0.309966666666667	-0.396927465484093	0.648525619561868	1	no	-	--	-	-	-	-
Unigene0000335	5515.66666666667	4267	64.1427	43.2557	37.5791	29.5489	10.6998	47.3188	48.3258333333333	29.1891666666667	-0.727361587220333	0.105614713235688	0.830615343303465	no	ttll6	PREDICTED: tubulin polyglutamylase ttll6-like [Sinocyclocheilus grahami]	-	GO:0005815//microtubule organizing center;GO:0043229//intracellular organelle;GO:0043232//intracellular non-membrane-bounded organelle;GO:0043226//organelle;GO:0005623//cell;GO:0044424//intracellular part;GO:0043228//non-membrane-bounded organelle;GO:0044422//organelle part;GO:0005622//intracellular;GO:0044446//intracellular organelle part;GO:0044430//cytoskeletal part;GO:0044464//cell part;GO:00…	GO:0070739//protein-glutamic acid ligase activity;GO:0016879//ligase activity, forming carbon-nitrogen bonds;GO:0008092//cytoskeletal protein binding;GO:0005488//binding;GO:0016874//ligase activity;GO:0005515//protein binding;GO:0016881//acid-amino acid ligase activity;GO:0003824//catalytic activity	GO:0018193//peptidyl-amino acid modification;GO:0001578//microtubule bundle formation;GO:0009987//cellular process;GO:0006996//organelle organization;GO:0000226//microtubule cytoskeleton organization;GO:0007017//microtubule-based process;GO:0044238//primary metabolic process;GO:0044763//single-organism cellular process;GO:0071840//cellular component organization or biogenesis;GO:0036211//protein …
Unigene0000336	24	24	0.8681	0.8543	1.3758	0.7980	1.1013	0.7141	1.03273333333333	0.871133333333333	-0.245502321714338	0.679652272854734	1	no	-	--	-	-	-	-
Unigene0000337	27.3333333333333	24	0.8940	0.8309	2.5108	1.2582	0.9022	1.0716	1.4119	1.07733333333333	-0.390173213752569	0.51455279675207	1	no	-	--	-	-	-	-
Unigene0000338	183.666666666667	282.333333333333	3.2222	4.0577	1.4254	1.9540	5.5912	2.9920	2.90176666666667	3.5124	0.275525635751541	0.5834482115622	1	no	prodh2	PREDICTED: probable proline dehydrogenase 2 [Sinocyclocheilus grahami]	ko01100//Metabolic pathways//Global and Overview//Metabolism;ko00330//Arginine and proline metabolism//Amino acid metabolism//Metabolism	-	GO:0016491//oxidoreductase activity;GO:0003824//catalytic activity;GO:0016645//oxidoreductase activity, acting on the CH-NH group of donors	GO:0044238//primary metabolic process;GO:0009987//cellular process;GO:0043648//dicarboxylic acid metabolic process;GO:0006560//proline metabolic process;GO:0071704//organic substance metabolic process;GO:1901605//alpha-amino acid metabolic process;GO:1901564//organonitrogen compound metabolic process;GO:0046483//heterocycle metabolic process;GO:0006807//nitrogen compound metabolic process;GO:0006…
Unigene0000339	6	4.66666666666667	0.5060	0.5487	0.3070	0.2865	0.4390	0.1179	0.4539	0.281133333333333	-0.691119967379918	0.507122873919142	1	no	-	--	-	-	-	-
Unigene0000340	17.3333333333333	15.3333333333333	1.2274	1.2223	1.4683	1.0127	1.4344	0.4291	1.306	0.958733333333333	-0.445953398818556	0.503437966143251	1	no	PCDHGB7	PREDICTED: protocadherin gamma-B7-like [Sinocyclocheilus anshuiensis]	-	GO:0016020//membrane	-	GO:0007155//cell adhesion;GO:0022610//biological adhesion
Unigene0000341	233.333333333333	342.333333333333	2.9086	5.3250	2.6955	2.6471	6.3842	3.9319	3.64303333333333	4.32106666666667	0.246247293782109	0.583902117865326	1	no	-	PREDICTED: guanylate cyclase 2G-like [Sinocyclocheilus grahami]	-	-	-	-
Unigene0000342	16	13	1.0303	0.5586	1.8130	0.5250	0.7662	1.0806	1.13396666666667	0.7906	-0.520358372125063	0.437409109106032	1	no	-	--	-	-	-	-
Unigene0000343	484.333333333333	598.333333333333	17.2529	14.4209	19.9137	15.4900	16.6148	20.3663	17.1958333333333	17.4903666666667	0.0245015016104405	0.946355052960844	1	no	-	--	-	-	-	-
Unigene0000344	139.333333333333	62.3333333333333	4.4279	1.9572	1.2324	0.7355	0.7610	1.1008	2.53916666666667	0.865766666666667	-1.55230493341157	0.00357919507675038	0.252564884549832	no	-	PREDICTED: RNA-directed DNA polymerase from mobile element jockey-like [Danio rerio]	-	-	-	-
Unigene0000345	8.66666666666667	13.6666666666667	0.6109	0.5678	0.5560	0.7783	0.7950	0.6407	0.578233333333333	0.738	0.351969038241108	0.614292441180936	1	no	-	--	-	-	-	-
Unigene0000346	1882.66666666667	2954	35.8462	34.6723	41.8470	49.4520	50.7180	44.7279	37.4551666666667	48.2993	0.366837538631177	0.226127920254453	0.943265792531584	no	eed	PREDICTED: polycomb protein EED [Cyprinus carpio]	-	GO:0043231//intracellular membrane-bounded organelle;GO:0005623//cell;GO:0043226//organelle;GO:0044464//cell part;GO:0043227//membrane-bounded organelle;GO:0005622//intracellular;GO:0043229//intracellular organelle;GO:0044424//intracellular part	-	GO:0044238//primary metabolic process;GO:0034645//cellular macromolecule biosynthetic process;GO:0016070//RNA metabolic process;GO:0032774//RNA biosynthetic process;GO:0044249//cellular biosynthetic process;GO:0009987//cellular process;GO:1901360//organic cyclic compound metabolic process;GO:0016043//cellular component organization;GO:0034654//nucleobase-containing compound biosynthetic process;G…
Unigene0000347	12.3333333333333	13.3333333333333	0.3181	1.3800	0.1158	0.3963	0.5521	0.5561	0.604633333333333	0.5015	-0.269810815854065	0.78419204714391	1	no	-	--	-	-	-	-
Unigene0000348	492.666666666667	440	2.5429	3.7170	2.5933	1.5746	2.7604	2.0936	2.95106666666667	2.14286666666667	-0.461694427116698	0.217951706066557	0.938658780507704	no	grid2	PREDICTED: glutamate receptor ionotropic, delta-2 isoform X1 [Danio rerio]	ko04080//Neuroactive ligand-receptor interaction//Signaling molecules and interaction//Environmental Information Processing	-	-	-
Unigene0000349	11.6666666666667	10	0.1443	0.1219	0.1337	0.0446	0.1463	0.0917	0.1333	0.0942	-0.50087781547619	0.462990167016792	1	no	ADGRD2	PREDICTED: adhesion G-protein coupled receptor D2-like [Sinocyclocheilus anshuiensis]	-	-	-	-
Unigene0000350	23	58	0.1275	0.6319	1.5469	2.3962	2.4645	0.3862	0.768766666666667	1.74896666666667	1.18588510532614	0.140559017621897	0.874599938762157	no	-	--	-	-	-	-
Unigene0000351	20	20.6666666666667	1.2616	0.8118	0.5653	0.7253	0.7938	0.6107	0.879566666666667	0.709933333333333	-0.309109376832403	0.622368047814509	1	no	TRIM16	PREDICTED: tripartite motif-containing protein 16-like, partial [Sinocyclocheilus rhinocerous]	-	-	-	-
Unigene0000352	10.6666666666667	2	1.4853	0.5177	0.6760	0.0000	0.0000	0.3895	0.893	0.129833333333333	-2.78199934778071	0.0100919203635023	0.404899231885006	no	-	--	-	-	-	-
Unigene0000353	6	15	0.5021	0.3734	0.6581	1.2965	1.3443	0.5618	0.5112	1.06753333333333	1.06232137677037	0.15045358818413	0.885569038728383	no	-	--	-	-	-	-
Unigene0000354	16.6666666666667	23	1.2136	1.8222	1.0876	1.2052	1.0413	2.2846	1.37446666666667	1.51036666666667	0.136026911043831	0.834422230589346	1	no	-	--	-	-	-	-
Unigene0000355	4	8	0.4005	0.0000	0.5832	0.6123	0.4467	0.6301	0.3279	0.563033333333333	0.779964435159138	0.492646568972146	1	no	-	--	-	-	-	-
Unigene0000356	10.6666666666667	11	0.4174	1.0863	0.7902	0.6807	0.9933	0.2918	0.764633333333333	0.655266666666667	-0.222685950338657	0.799236938149591	1	no	-	PREDICTED: piggyBac transposable element-derived protein 4-like [Cyprinus carpio]	-	-	-	-
Unigene0000357	6	2.33333333333333	0.8262	0.3413	0.3342	0.1871	0.0000	0.2568	0.500566666666667	0.147966666666667	-1.75829001549382	0.102993804137676	0.826526840219855	no	-	--	-	-	-	-
Unigene0000358	16.6666666666667	14.3333333333333	1.2726	0.4929	0.6178	0.3243	0.4732	0.8157	0.794433333333333	0.537733333333333	-0.563035252619322	0.423956347108351	1	no	-	--	-	-	-	-
Unigene0000359	29.3333333333333	24	3.4229	1.6631	1.1896	1.0572	0.3471	2.5022	2.09186666666667	1.30216666666667	-0.683876785214746	0.348194645444505	0.990183685238501	no	-	--	-	-	-	-
Unigene0000360	451.333333333333	617	34.8476	34.7235	46.4348	47.3564	32.4122	50.7689	38.6686333333333	43.5125	0.170266132841266	0.637814748424534	1	no	NDUFB1	PREDICTED: NADH dehydrogenase [ubiquinone] 1 beta subcomplex subunit 1 [Ictalurus punctatus]	ko01100//Metabolic pathways//Global and Overview//Metabolism;ko00190//Oxidative phosphorylation//Energy metabolism//Metabolism	GO:0044464//cell part;GO:0005623//cell;GO:0005622//intracellular;GO:0044424//intracellular part;GO:0043229//intracellular organelle;GO:0043226//organelle;GO:0043231//intracellular membrane-bounded organelle;GO:0043227//membrane-bounded organelle	-	GO:0008152//metabolic process;GO:0044710//single-organism metabolic process;GO:0044699//single-organism process
Unigene0000361	123.666666666667	161.666666666667	2.5568	1.4625	2.3057	2.3387	2.3987	2.0078	2.10833333333333	2.2484	0.0927957409396801	0.830756087394867	1	no	ric3	PREDICTED: protein RIC-3-like isoform X2 [Sinocyclocheilus anshuiensis]	-	-	-	-
Unigene0000362	18.3333333333333	16	0.8322	0.6825	0.8198	0.4657	0.9101	0.3081	0.778166666666667	0.5613	-0.471307123446456	0.45531701243809	1	no	-	--	-	-	-	-
Unigene0000363	14	18.3333333333333	0.7808	1.7740	0.6949	0.8842	1.4194	1.0919	1.08323333333333	1.13183333333333	0.0633174921775397	0.923055240905988	1	no	-	hypothetical protein XENTR_v900217182mg, partial [Xenopus tropicalis]	-	-	-	-
Unigene0000364	17.6666666666667	12.3333333333333	0.8957	0.9886	0.7337	0.1521	0.4163	0.9003	0.872666666666667	0.489566666666667	-0.83392535946417	0.236394277687837	0.949329510768927	no	-	--	-	-	-	-
Unigene0000365	6.66666666666667	7.66666666666667	0.4005	0.2792	0.9478	0.2041	1.4147	0.0700	0.5425	0.562933333333333	0.0533409404067949	1	1	no	MYO7B	PREDICTED: unconventional myosin-VIIa isoform X1 [Danio rerio]	-	-	-	-
Unigene0000366	159	194.333333333333	1.5486	1.6397	2.2651	1.5464	1.7024	2.2975	1.8178	1.84876666666667	0.0243696748306078	0.956256627688663	1	no	SLC12A1	PREDICTED: solute carrier family 12 member 1 [Scleropages formosus]	-	GO:0043226//organelle;GO:0031988//membrane-bounded vesicle;GO:0043227//membrane-bounded organelle;GO:0031982//vesicle;GO:0016020//membrane	GO:0005215//transporter activity;GO:0015291//secondary active transmembrane transporter activity;GO:0015294//solute:cation symporter activity;GO:0022892//substrate-specific transporter activity;GO:0008324//cation transmembrane transporter activity;GO:0015103//inorganic anion transmembrane transporter activity;GO:0022891//substrate-specific transmembrane transporter activity;GO:0015377//cation:chl…	GO:0051179//localization;GO:0006811//ion transport;GO:0044699//single-organism process;GO:0044765//single-organism transport;GO:0044763//single-organism cellular process;GO:0006812//cation transport;GO:0051234//establishment of localization;GO:0006820//anion transport;GO:0006821//chloride transport;GO:0009987//cellular process;GO:0030001//metal ion transport;GO:0006810//transport;GO:0015698//inor…
Unigene0000367	12.3333333333333	6.33333333333333	1.1766	0.7291	1.2137	0.2665	0.3646	0.6856	1.0398	0.4389	-1.24434188502168	0.0901689422642658	0.810210197000949	no	-	novel immune-type receptor 1f, allele 2 [Danio rerio]	-	-	-	-
Unigene0000368	37	37.3333333333333	0.4633	0.4306	0.4267	0.3796	0.4155	0.2858	0.4402	0.3603	-0.288960493464767	0.575394841447755	1	no	Cdca4	PREDICTED: cell division cycle-associated protein 4-like isoform X1 [Sinocyclocheilus grahami]	-	-	-	-
Unigene0000369	10.6666666666667	3.66666666666667	0.8620	1.6915	0.2790	0.1302	0.3561	0.2679	0.944166666666667	0.2514	-1.90905690045358	0.0382787026265621	0.660816571181982	no	-	PREDICTED: cullin-9-like [Sinocyclocheilus rhinocerous]	-	-	-	-
Unigene0000370	4	2	0.1500	0.5575	0.1092	0.1019	0.0000	0.2097	0.272233333333333	0.103866666666667	-1.39011099430462	0.255256602269142	0.959919123134729	no	-	--	-	-	-	-
Unigene0000371	16.6666666666667	17	0.5669	0.5749	1.0133	0.5953	0.9582	0.3243	0.718366666666667	0.625933333333333	-0.198711401001174	0.779247532214766	1	no	-	--	-	-	-	-
Unigene0000372	2939.66666666667	3621	14.7721	14.4567	18.7185	15.5287	18.2335	15.1359	15.9824333333333	16.2993666666667	0.0283288317138761	0.926669412182714	1	no	PER2	PREDICTED: period circadian protein homolog 2-like isoform X1 [Pygocentrus nattereri]	-	-	-	-
Unigene0000373	7.33333333333333	11.6666666666667	0.3983	0.5183	0.5801	0.7578	0.7109	0.5013	0.4989	0.656666666666667	0.39641055450152	0.625733569839831	1	no	-	--	-	-	-	-
Unigene0000374	6877.66666666667	7177	71.1174	68.5189	83.2801	66.4107	67.0971	57.7029	74.3054666666667	63.7369	-0.22133950218366	0.453862152056636	1	no	DEK	PREDICTED: protein DEK-like [Sinocyclocheilus grahami]	-	-	GO:0005488//binding;GO:0003676//nucleic acid binding;GO:0097159//organic cyclic compound binding;GO:1901363//heterocyclic compound binding	-
Unigene0000375	23.3333333333333	14.6666666666667	1.2695	1.1179	1.6055	0.4086	1.3913	0.3270	1.33096666666667	0.708966666666667	-0.908684736903368	0.170976558386699	0.907207054138259	no	-	--	-	-	-	-
Unigene0000376	8.66666666666667	8	0.1938	0.8106	1.0584	0.4609	0.5044	0.6776	0.6876	0.547633333333333	-0.328359281618444	0.688024120047802	1	no	-	--	-	-	-	-
Unigene0000377	15	13.6666666666667	0.7483	0.3478	0.9341	0.2179	0.5168	0.8223	0.676733333333333	0.519	-0.382852913434568	0.615550679260628	1	no	-	PREDICTED: neuron navigator 3-like [Poecilia mexicana]	-	-	-	-
Unigene0000378	140.666666666667	181.666666666667	1.6922	1.3550	1.7061	1.5124	2.3522	1.1923	1.58443333333333	1.68563333333333	0.0893237906726771	0.841675048368655	1	no	nrarpb	PREDICTED: notch-regulated ankyrin repeat-containing protein B isoform X1 [Danio rerio]	-	-	-	-
Unigene0000379	16	15.3333333333333	0.9790	0.7280	0.4277	0.7983	0.2184	0.5477	0.711566666666667	0.521466666666667	-0.448423893803624	0.546794831404236	1	no	-	--	-	-	-	-
Unigene0000380	148	169	2.0499	3.1332	3.4166	2.9869	2.0326	3.0897	2.86656666666667	2.70306666666667	-0.0847267376471712	0.842072599708155	1	no	Rasd1	dexamethasone-induced Ras-related protein 1 [Danio rerio]	-	-	GO:0036094//small molecule binding;GO:0005488//binding	GO:0019693//ribose phosphate metabolic process;GO:0035556//intracellular signal transduction;GO:0006793//phosphorus metabolic process;GO:0009987//cellular process;GO:0006163//purine nucleotide metabolic process;GO:0071704//organic substance metabolic process;GO:0009117//nucleotide metabolic process;GO:0051716//cellular response to stimulus;GO:0046483//heterocycle metabolic process;GO:0034641//cel…
Unigene0000381	8575.33333333333	6560	625.0915	385.9202	466.9700	307.9263	96.1505	492.1987	492.660566666667	298.7585	-0.721614240771708	0.119906323358209	0.853716025979106	no	DYNLRB2	PREDICTED: dynein light chain roadblock-type 2 [Astyanax mexicanus]	-	-	-	-
Unigene0000382	14.6666666666667	14.3333333333333	1.6471	0.3062	0.6717	0.1791	0.4900	1.3360	0.875	0.668366666666667	-0.388643233028008	0.686701720827415	1	no	-	--	-	-	-	-
Unigene0000383	7.66666666666667	12	0.5083	0.1890	1.1844	1.2433	0.8316	0.4976	0.627233333333333	0.8575	0.451134440026137	0.636881241451949	1	no	-	--	-	-	-	-
Unigene0000384	266	187	3.4499	3.3767	2.4360	1.8824	1.8465	1.4529	3.08753333333333	1.72726666666667	-0.83796387955865	0.0300831923858783	0.612031774743487	no	eif3a	PREDICTED: protein LIAT1 [Pseudopodoces humilis]	-	-	-	-
Unigene0000385	74	188.333333333333	0.5903	2.2338	1.2281	1.3752	4.4368	2.7418	1.35073333333333	2.85126666666667	1.07786009393197	0.0568686366843051	0.738355832547487	no	foxa2	PREDICTED: hepatocyte nuclear factor 3-beta [Sinocyclocheilus rhinocerous]	-	-	-	-
Unigene0000386	1825.33333333333	1336	9.3444	5.9809	6.9558	3.7813	2.5732	6.6535	7.42703333333333	4.336	-0.776421296605272	0.0476767313508637	0.700651768272896	no	IGSF3	PREDICTED: immunoglobulin superfamily member 3-like [Sinocyclocheilus rhinocerous]	-	-	-	-
Unigene0000387	14.3333333333333	22.3333333333333	0.6977	0.5404	0.8891	1.2642	0.5621	0.8944	0.709066666666667	0.9069	0.355022203212351	0.580555185851032	1	no	pol	Pro-Pol polyprotein [Larimichthys crocea]	-	-	-	-
Unigene0000388	158	120.333333333333	1.2996	2.1763	0.9088	0.6518	1.0969	0.9015	1.46156666666667	0.8834	-0.726376899026396	0.116568085958417	0.847953661102948	no	Rasa4	PREDICTED: ras GTPase-activating protein 4-like isoform X1 [Sinocyclocheilus anshuiensis]	-	-	-	-
Unigene0000389	8.33333333333333	5.33333333333333	0.7986	1.0206	0.4361	0.4070	0.5196	0.2094	0.751766666666667	0.378666666666667	-0.989356518693447	0.219633011817862	0.940487627775114	no	FRRS1	si:dkey-251i10.2 precursor [Danio rerio]	-	-	-	-
Unigene0000390	3.66666666666667	10.3333333333333	0.0696	0.0647	0.4563	0.4731	0.6213	0.4381	0.196866666666667	0.510833333333333	1.37563381233155	0.13816390254384	0.871936610971617	no	-	PREDICTED: contactin-3-like [Sinocyclocheilus anshuiensis]	-	-	-	-
Unigene0000391	1299.33333333333	1297.66666666667	24.1185	18.7541	19.0629	14.2136	11.5092	23.7667	20.6451666666667	16.4965	-0.323644099526532	0.37342150910924	0.998430666364697	no	cyhr1	PREDICTED: cysteine and histidine-rich protein 1 [Sinocyclocheilus rhinocerous]	-	GO:0005623//cell;GO:0005622//intracellular;GO:0044424//intracellular part;GO:0044464//cell part	GO:0046872//metal ion binding;GO:0005488//binding;GO:0043169//cation binding;GO:0043167//ion binding;GO:0046914//transition metal ion binding	GO:0070647//protein modification by small protein conjugation or removal;GO:0043412//macromolecule modification;GO:0008152//metabolic process;GO:0044260//cellular macromolecule metabolic process;GO:0009987//cellular process;GO:0019538//protein metabolic process;GO:0043170//macromolecule metabolic process;GO:0071704//organic substance metabolic process;GO:0044237//cellular metabolic process;GO:004…
Unigene0000392	503.333333333333	621.333333333333	8.0576	11.8596	5.6877	12.0320	9.0375	3.8312	8.53496666666667	8.30023333333333	-0.0402336252335849	0.930415981779959	1	no	fsta	PREDICTED: follistatin-A-like [Sinocyclocheilus rhinocerous]	ko04350//TGF-beta signaling pathway//Signal transduction//Environmental Information Processing	-	-	-
Unigene0000393	231.333333333333	228	2.5396	2.0006	2.3385	1.5090	2.4222	1.6165	2.2929	1.84923333333333	-0.310246162984689	0.430731483299301	1	no	Pacs1	PREDICTED: phosphofurin acidic cluster sorting protein 2-like isoform X2 [Sinocyclocheilus anshuiensis]	-	-	-	-
Unigene0000394	4	3	0.2793	0.0865	0.5423	0.1898	0.1385	0.2604	0.3027	0.196233333333333	-0.625318548235924	0.557149001608849	1	no	-	--	-	-	-	-
Unigene0000395	16.3333333333333	26	0.5542	0.6181	1.0895	1.5439	0.5358	0.9300	0.753933333333333	1.00323333333333	0.412148325170511	0.528894579830828	1	no	-	--	-	-	-	-
Unigene0000396	862	1001.33333333333	5.6165	6.6852	7.9260	5.9268	7.8767	5.7403	6.74256666666667	6.5146	-0.0496212818310184	0.884391652848652	1	no	MAPT	PREDICTED: microtubule-associated protein tau-like isoform X3 [Sinocyclocheilus anshuiensis]	ko04010//MAPK signaling pathway//Signal transduction//Environmental Information Processing	-	-	-
Unigene0000397	26.6666666666667	30.3333333333333	1.8576	2.0029	1.4068	1.8176	0.4973	2.3900	1.75576666666667	1.5683	-0.162899571173285	0.801115233642714	1	no	-	--	-	-	-	-
Unigene0000398	13	15.6666666666667	1.2242	1.4629	0.4457	1.3665	0.5202	0.9783	1.04426666666667	0.955	-0.12891753107207	0.920681565692205	1	no	-	--	-	-	-	-
Unigene0000399	7.33333333333333	12	0.5034	0.4679	0.6109	0.4561	0.5615	1.1146	0.5274	0.710733333333333	0.430410791959179	0.593510131581221	1	no	-	--	-	-	-	-
Unigene0000400	1134	774.333333333333	19.1828	11.1256	12.4896	6.4930	6.7790	10.0077	14.266	7.7599	-0.878470912699658	0.0162317527159552	0.491442955522363	no	TMEM104	PREDICTED: transmembrane protein 104-like [Sinocyclocheilus grahami]	-	GO:0044425//membrane part;GO:0016020//membrane;GO:0031224//intrinsic component of membrane	-	-
Unigene0000401	24.3333333333333	39.6666666666667	1.1255	1.2205	1.5481	1.8694	2.6505	0.7870	1.29803333333333	1.76896666666667	0.446579430974889	0.444555032856016	1	no	-	--	-	-	-	-
Unigene0000402	14.3333333333333	18.6666666666667	0.8843	0.3216	0.3079	0.5486	0.6862	0.2957	0.5046	0.510166666666667	0.0158284327168979	1	1	no	-	--	-	-	-	-
Unigene0000403	1319.66666666667	1762.33333333333	10.8742	11.9834	13.1584	14.7632	13.7058	10.9877	12.0053333333333	13.1522333333333	0.131632337980374	0.681183997512758	1	no	Fnta	protein farnesyltransferase/geranylgeranyltransferase type-1 subunit alpha [Danio rerio]	ko01130//Biosynthesis of antibiotics//Global and Overview//Metabolism;ko00900//Terpenoid backbone biosynthesis//Metabolism of terpenoids and polyketides//Metabolism	-	GO:0003824//catalytic activity;GO:0016740//transferase activity;GO:0016765//transferase activity, transferring alkyl or aryl (other than methyl) groups;GO:0004659//prenyltransferase activity	-
Unigene0000404	79.3333333333333	76.6666666666667	1.4922	1.7448	1.7174	1.6190	1.4497	0.8414	1.65146666666667	1.30336666666667	-0.341504846535899	0.461747399394896	1	no	-	--	-	-	-	-
Unigene0000405	3043.66666666667	2576.66666666667	40.7436	29.8846	34.5325	25.4281	14.3266	31.5846	35.0535666666667	23.7797666666667	-0.559826685486807	0.112761866222678	0.840747560276167	no	b3gnt5a	PREDICTED: lactosylceramide 1,3-N-acetyl-beta-D-glucosaminyltransferase [Cyprinus carpio]	ko01100//Metabolic pathways//Global and Overview//Metabolism;ko00601//Glycosphingolipid biosynthesis - lacto and neolacto series//Glycan biosynthesis and metabolism//Metabolism	GO:0044424//intracellular part;GO:0043227//membrane-bounded organelle;GO:0044425//membrane part;GO:0005623//cell;GO:0044446//intracellular organelle part;GO:0005737//cytoplasm;GO:0016020//membrane;GO:0043226//organelle;GO:0012505//endomembrane system;GO:0044444//cytoplasmic part;GO:0043231//intracellular membrane-bounded organelle;GO:0044422//organelle part;GO:0005794//Golgi apparatus;GO:0044464/…	GO:0003824//catalytic activity;GO:0008194//UDP-glycosyltransferase activity;GO:0016758//transferase activity, transferring hexosyl groups;GO:0008375//acetylglucosaminyltransferase activity;GO:0016740//transferase activity;GO:0016757//transferase activity, transferring glycosyl groups	GO:0044237//cellular metabolic process;GO:0009987//cellular process;GO:0006464//cellular protein modification process;GO:0043170//macromolecule metabolic process;GO:0019538//protein metabolic process;GO:0071704//organic substance metabolic process;GO:0044238//primary metabolic process;GO:0043412//macromolecule modification;GO:0008152//metabolic process;GO:0036211//protein modification process;GO:…
Unigene0000406	1201	1307.33333333333	13.6288	9.1494	13.6529	11.2511	9.7605	11.3814	12.1437	10.7976666666667	-0.169488470385883	0.610837900752745	1	no	e4f1	PREDICTED: transcription factor E4F1 isoform X2 [Sinocyclocheilus rhinocerous]	-	GO:0005634//nucleus;GO:0070013//intracellular organelle lumen;GO:0043226//organelle;GO:0043227//membrane-bounded organelle;GO:0005622//intracellular;GO:0043229//intracellular organelle;GO:0044464//cell part;GO:0044422//organelle part;GO:0044424//intracellular part;GO:0031974//membrane-enclosed lumen;GO:0043233//organelle lumen;GO:0031981//nuclear lumen;GO:0005623//cell;GO:0044428//nuclear part;GO…	GO:0003824//catalytic activity;GO:1901363//heterocyclic compound binding;GO:0097159//organic cyclic compound binding;GO:0005488//binding;GO:0003676//nucleic acid binding	GO:0044238//primary metabolic process;GO:0018130//heterocycle biosynthetic process;GO:0034654//nucleobase-containing compound biosynthetic process;GO:0044267//cellular protein metabolic process;GO:0032446//protein modification by small protein conjugation;GO:0044237//cellular metabolic process;GO:0043412//macromolecule modification;GO:0044271//cellular nitrogen compound biosynthetic process;GO:00…
Unigene0000407	9.33333333333333	10.3333333333333	0.5165	0.4800	1.0029	0.4679	0.7042	0.7223	0.666466666666667	0.631466666666667	-0.0778261404739689	0.940295091547904	1	no	-	--	-	-	-	-
Unigene0000408	7	7.33333333333333	0.4668	0.3471	0.8157	0.5075	0.6942	0.2611	0.5432	0.4876	-0.15578535362452	0.926725599069668	1	no	-	--	-	-	-	-
Unigene0000409	621	696.333333333333	4.1217	4.6591	6.6299	4.5369	6.4798	3.5392	5.1369	4.85196666666667	-0.0823283499412477	0.826983094556467	1	no	DACH2	PREDICTED: dachshund homolog 2-like isoform X1 [Cyprinus carpio]	-	GO:0043229//intracellular organelle;GO:0044464//cell part;GO:0043227//membrane-bounded organelle;GO:0044424//intracellular part;GO:0005622//intracellular;GO:0005623//cell;GO:0043231//intracellular membrane-bounded organelle;GO:0043226//organelle	-	GO:0044707//single-multicellular organism process;GO:0044767//single-organism developmental process;GO:0007275//multicellular organism development;GO:0048856//anatomical structure development;GO:0048731//system development;GO:0032501//multicellular organismal process;GO:0044699//single-organism process;GO:0031016//pancreas development;GO:0048513//animal organ development;GO:0032502//developmental…
Unigene0000410	38.6666666666667	40	2.4631	1.8732	1.4675	1.8258	1.6236	1.2917	1.9346	1.58036666666667	-0.29177598180087	0.570984560024264	1	no	-	--	-	-	-	-
Unigene0000411	10.6666666666667	9.33333333333333	0.3626	0.8762	0.7393	0.6898	0.1079	0.6085	0.659366666666667	0.468733333333333	-0.49231356171903	0.562142660824197	1	no	-	--	-	-	-	-
Unigene0000412	3007	4272.33333333333	27.5622	30.0281	33.5463	39.0039	33.0728	34.0115	30.3788666666667	35.3627333333333	0.219161742218959	0.465481692293731	1	no	ankrd13c	PREDICTED: ankyrin repeat domain-containing protein 13C [Sinocyclocheilus anshuiensis]	-	GO:0043226//organelle;GO:0043231//intracellular membrane-bounded organelle;GO:0043229//intracellular organelle;GO:0044424//intracellular part;GO:0044464//cell part;GO:0042175//nuclear outer membrane-endoplasmic reticulum membrane network;GO:0016020//membrane;GO:0005622//intracellular;GO:0005623//cell;GO:0043227//membrane-bounded organelle;GO:0012505//endomembrane system	-	-
Unigene0000413	27	26.6666666666667	0.9376	0.5304	1.3060	0.8309	1.0610	0.4275	0.924666666666667	0.773133333333333	-0.258216141350511	0.66145754170672	1	no	FRAS1	PREDICTED: extracellular matrix protein FRAS1-like [Sinocyclocheilus rhinocerous]	-	-	-	GO:0009790//embryo development;GO:0048598//embryonic morphogenesis;GO:0009987//cellular process;GO:0043062//extracellular structure organization;GO:0048736//appendage development;GO:0032501//multicellular organismal process;GO:0044707//single-multicellular organism process;GO:0016043//cellular component organization;GO:0030198//extracellular matrix organization;GO:0033333//fin development;GO:0009…
Unigene0000414	31.3333333333333	27.6666666666667	1.6968	2.2178	0.6564	0.9728	0.9069	1.2235	1.52366666666667	1.0344	-0.55875313795999	0.34395759307755	0.988828608771509	no	-	--	-	-	-	-
Unigene0000415	15.3333333333333	15.6666666666667	0.7798	0.6644	1.0883	0.6623	1.1598	0.3635	0.844166666666667	0.728533333333333	-0.212532880285774	0.767534292424858	1	no	-	PREDICTED: protocadherin Fat 2-like [Sinocyclocheilus grahami]	-	-	-	-
Unigene0000416	67.6666666666667	41.6666666666667	1.3536	1.6639	0.9379	0.4747	1.3313	0.1679	1.31846666666667	0.657966666666667	-1.00277469523498	0.124127980539035	0.856653486857905	no	-	--	-	-	-	-
Unigene0000417	8	8	0.2680	0.7472	0.7805	0.2428	0.4650	0.8120	0.598566666666667	0.5066	-0.240664862370801	0.811102751787716	1	no	-	--	-	-	-	-
Unigene0000418	17	31.6666666666667	0.5379	0.8460	0.4820	0.9277	1.0153	0.8390	0.621966666666667	0.927333333333333	0.576250750609005	0.301074458678591	0.97967753014196	no	Gtf2ird2	general transcription factor II-I repeat domain-containing protein 2B-like [Alligator mississippiensis]	-	-	-	-
Unigene0000419	25.3333333333333	15	1.1160	0.8118	1.2366	0.3956	0.5773	0.5768	1.0548	0.516566666666667	-1.02994301986086	0.0654026993454273	0.760746403775948	no	-	--	-	-	-	-
Unigene0000420	1069.33333333333	1175	11.9491	14.2478	15.0713	13.7589	12.6118	10.8438	13.7560666666667	12.4048333333333	-0.149165660940892	0.647299840272996	1	no	ZDHHC6	PREDICTED: palmitoyltransferase ZDHHC6 [Sinocyclocheilus grahami]	-	GO:0016020//membrane;GO:0031224//intrinsic component of membrane;GO:0044425//membrane part	GO:0016740//transferase activity;GO:0046914//transition metal ion binding;GO:0005488//binding;GO:0003824//catalytic activity;GO:0016746//transferase activity, transferring acyl groups;GO:0043169//cation binding;GO:0016409//palmitoyltransferase activity;GO:0016747//transferase activity, transferring acyl groups other than amino-acyl groups;GO:0046872//metal ion binding;GO:0043167//ion binding	-
Unigene0000421	6.33333333333333	9	0.6067	0.3524	0.3313	0.5153	0.2820	0.6363	0.430133333333333	0.477866666666667	0.151824198901964	0.929451844912366	1	no	-	--	-	-	-	-
Unigene0000422	633.333333333333	823.333333333333	10.1515	13.6245	13.4248	14.5842	14.5231	10.6473	12.4002666666667	13.2515333333333	0.0957881574264085	0.783243012160716	1	no	BMS1	ribosome biogenesis protein BMS1 homolog [Danio rerio]	ko03008//Ribosome biogenesis in eukaryotes//Translation//Genetic Information Processing	GO:0044424//intracellular part;GO:0005622//intracellular;GO:0043227//membrane-bounded organelle;GO:0043226//organelle;GO:0005623//cell;GO:0044464//cell part;GO:0043231//intracellular membrane-bounded organelle;GO:0043229//intracellular organelle	GO:0001883//purine nucleoside binding;GO:0003824//catalytic activity;GO:0005488//binding;GO:1901363//heterocyclic compound binding;GO:0032550//purine ribonucleoside binding;GO:0016818//hydrolase activity, acting on acid anhydrides, in phosphorus-containing anhydrides;GO:0032549//ribonucleoside binding;GO:0016462//pyrophosphatase activity;GO:0097159//organic cyclic compound binding;GO:0036094//sma…	GO:0044085//cellular component biogenesis;GO:0022613//ribonucleoprotein complex biogenesis;GO:0044767//single-organism developmental process;GO:0071840//cellular component organization or biogenesis;GO:0044699//single-organism process;GO:0042254//ribosome biogenesis;GO:0032502//developmental process
Unigene0000423	11.6666666666667	9.33333333333333	1.4944	0.8171	0.5121	0.4778	0.3922	0.8605	0.9412	0.576833333333333	-0.706346784892645	0.363267070895401	0.99528595490057	no	-	--	-	-	-	-
Unigene0000424	1209.66666666667	1171.33333333333	7.3882	6.8876	8.6119	5.5286	6.0508	6.6486	7.62923333333333	6.076	-0.328416217131891	0.308433247464321	0.981537859477186	no	FBXO30	PREDICTED: F-box only protein 30-like [Sinocyclocheilus rhinocerous]	-	-	GO:0043169//cation binding;GO:0016740//transferase activity;GO:0043167//ion binding;GO:0005488//binding;GO:0003824//catalytic activity;GO:0046914//transition metal ion binding;GO:0046872//metal ion binding;GO:0019787//ubiquitin-like protein transferase activity	GO:0070647//protein modification by small protein conjugation or removal;GO:0044260//cellular macromolecule metabolic process;GO:0043412//macromolecule modification;GO:0044237//cellular metabolic process;GO:0044238//primary metabolic process;GO:0044267//cellular protein metabolic process;GO:0019538//protein metabolic process;GO:0009987//cellular process;GO:0043170//macromolecule metabolic process…
Unigene0000425	9.33333333333333	4.66666666666667	0.5099	0.5529	0.9281	0.1155	0.4424	0.2971	0.663633333333333	0.285	-1.21942443330171	0.139953242044526	0.874122241192363	no	VWA1	PREDICTED: von Willebrand factor A domain-containing protein 1 [Ictalurus punctatus]	-	-	-	-
Unigene0000426	804.333333333333	1017	5.2276	6.0572	6.9636	6.5401	7.2695	5.2729	6.0828	6.36083333333333	0.0644802157344216	0.8495827751196	1	no	Wdr6	PREDICTED: WD repeat-containing protein 6-like [Sinocyclocheilus rhinocerous]	-	-	-	-
Unigene0000427	0	0	0.0000	0.0000	0.0000	0.0000	0.0000	0.0000	0.001	0.001	0	notest	notest	notest	-	--	-	-	-	-
Unigene0000428	107.666666666667	76.6666666666667	2.8295	2.7508	3.4338	1.0386	2.1525	2.1376	3.0047	1.77623333333333	-0.758399841786232	0.100930724026679	0.824532333114647	no	-	--	-	-	-	-
Unigene0000429	123.333333333333	5	3.0597	10.2308	0.4630	0.0540	0.1773	0.1945	4.5845	0.141933333333333	-5.01347904335615	2.18118314601574e-07	0.000427623903321178	yes	-	PREDICTED: sorting nexin-10A-like [Cyprinus carpio]	-	-	-	-
Unigene0000430	2267	2880.33333333333	19.6241	21.2439	19.3955	21.4410	22.5669	18.1202	20.0878333333333	20.7093666666667	0.0439614698886078	0.884759640532243	1	no	PISD	PREDICTED: phosphatidylserine decarboxylase proenzyme, mitochondrial isoform X4 [Sinocyclocheilus grahami]	ko01100//Metabolic pathways//Global and Overview//Metabolism;ko01110//Biosynthesis of secondary metabolites//Global and Overview//Metabolism;ko00564//Glycerophospholipid metabolism//Lipid metabolism//Metabolism	-	GO:0016829//lyase activity;GO:0016831//carboxy-lyase activity;GO:0003824//catalytic activity;GO:0016830//carbon-carbon lyase activity	GO:0008152//metabolic process;GO:0044710//single-organism metabolic process;GO:0044699//single-organism process;GO:0044763//single-organism cellular process;GO:0006793//phosphorus metabolic process;GO:0044255//cellular lipid metabolic process;GO:0019637//organophosphate metabolic process;GO:0006629//lipid metabolic process;GO:0006796//phosphate-containing compound metabolic process;GO:0044237//ce…
Unigene0000431	1560.33333333333	1335.33333333333	23.0131	40.0190	17.6421	20.3293	23.9423	10.6016	26.8914	18.2910666666667	-0.556005655554345	0.174529910843502	0.910480057725768	no	Tpm4	PREDICTED: tropomyosin alpha-4 chain isoform X3 [Sinocyclocheilus grahami]	ko04261//Adrenergic signaling in cardiomyocytes//Circulatory system//Organismal Systems;ko04260//Cardiac muscle contraction//Circulatory system//Organismal Systems	-	-	GO:0044699//single-organism process;GO:0030036//actin cytoskeleton organization;GO:0032501//multicellular organismal process;GO:0007010//cytoskeleton organization;GO:0006996//organelle organization;GO:1902589//single-organism organelle organization;GO:0048468//cell development;GO:0070925//organelle assembly;GO:0022607//cellular component assembly;GO:0055001//muscle cell development;GO:0044085//ce…
Unigene0000432	11409	19312	88.0369	113.3319	115.5362	151.0043	156.1774	134.0722	105.635	147.084633333333	0.477558607462909	0.109232565053964	0.834673629075445	no	mcm4	PREDICTED: DNA replication licensing factor mcm4 [Sinocyclocheilus rhinocerous]	ko04110//Cell cycle//Cell growth and death//Cellular Processes;ko03030//DNA replication//Replication and repair//Genetic Information Processing	GO:0032991//macromolecular complex;GO:0043234//protein complex	GO:0016787//hydrolase activity;GO:0032549//ribonucleoside binding;GO:0005488//binding;GO:0001882//nucleoside binding;GO:1901363//heterocyclic compound binding;GO:0032550//purine ribonucleoside binding;GO:0097159//organic cyclic compound binding;GO:0001883//purine nucleoside binding;GO:0016818//hydrolase activity, acting on acid anhydrides, in phosphorus-containing anhydrides;GO:0003676//nucleic a…	GO:0051704//multi-organism process;GO:0050896//response to stimulus;GO:0006996//organelle organization;GO:0009607//response to biotic stimulus;GO:0051707//response to other organism;GO:0032392//DNA geometric change;GO:0016043//cellular component organization;GO:0009620//response to fungus;GO:0051276//chromosome organization;GO:0009987//cellular process;GO:0043207//response to external biotic stim…
Unigene0000433	8	3	0.2694	1.0017	0.5886	0.0000	0.4675	0.1256	0.6199	0.1977	-1.6487226329163	0.10923841853257	0.834673629075445	no	-	PREDICTED: trichohyalin-like isoform X1 [Sinocyclocheilus grahami]	-	-	-	-
Unigene0000434	477	688.333333333333	4.0156	4.6655	5.7276	5.7218	6.1481	5.3843	4.8029	5.7514	0.260007407291492	0.450569162250458	1	no	ATXN7L2	PREDICTED: ataxin-7-like protein 2 [Sinocyclocheilus anshuiensis]	-	-	-	-
Unigene0000435	0	0.666666666666667	0.0000	0.0000	0.0000	0.0000	0.1287	0.0000	0.001	0.0429	5.42290574261218	0.552041619220002	1	no	-	--	-	-	-	-
Unigene0000436	22	16	2.1972	1.6167	1.5332	0.6220	1.2935	1.2162	1.78236666666667	1.0439	-0.771810641046319	0.187354678209042	0.920268860540914	no	-	--	-	-	-	-
Unigene0000437	84.3333333333333	86.6666666666667	4.7435	4.7664	4.6209	4.7040	3.2892	3.7202	4.71026666666667	3.90446666666667	-0.270683242878633	0.536108831764506	1	no	-	--	-	-	-	-
Unigene0000438	24.3333333333333	38.6666666666667	0.7214	0.8677	1.0505	1.2110	0.9467	1.3055	0.879866666666667	1.1544	0.391786382798419	0.452608995610935	1	no	Slc12a5	PREDICTED: solute carrier family 12 member 5-like [Sinocyclocheilus rhinocerous]	-	-	-	-
Unigene0000439	277.333333333333	387.666666666667	16.0449	26.1871	25.6614	33.0959	24.0060	21.0356	22.6311333333333	26.0458333333333	0.202743762257617	0.605090068419849	1	no	-	--	-	-	-	-
Unigene0000440	274.333333333333	325	3.6517	2.5304	3.2023	4.5801	2.4626	1.8944	3.12813333333333	2.97903333333333	-0.0704577408442982	0.871520138180213	1	no	-	PREDICTED: uncharacterized protein LOC107572457 [Sinocyclocheilus grahami]	-	-	-	-
Unigene0000441	1530.33333333333	1990	11.6277	12.5018	15.2198	15.2435	13.9202	13.0323	13.1164333333333	14.0653333333333	0.100768272808064	0.749152655356764	1	no	GABPA	PREDICTED: GA-binding protein alpha chain-like isoform X1 [Sinocyclocheilus grahami]	-	-	-	-
Unigene0000442	93.6666666666667	90.3333333333333	2.8676	2.3019	2.7762	2.3027	1.6963	2.2102	2.64856666666667	2.06973333333333	-0.355766921629994	0.415683987809516	1	no	-	PREDICTED: zinc finger MYM-type protein 4-like [Cyprinus carpio]	-	-	-	-
Unigene0000443	16.3333333333333	7.66666666666667	0.7383	1.1437	1.4933	0.5016	0.4270	0.4015	1.1251	0.443366666666667	-1.34348102106339	0.0387954101570965	0.663252476404813	no	-	--	-	-	-	-
Unigene0000444	201.666666666667	176	1.9610	2.5760	2.3132	1.3413	2.3333	1.2523	2.2834	1.6423	-0.47546591999765	0.25457979428799	0.959783584445452	no	-	--	-	-	-	-
Unigene0000445	17.6666666666667	10	0.9022	0.2795	1.4453	0.5313	0.1342	0.5888	0.875666666666667	0.4181	-1.0665337512557	0.159750586262352	0.897023609180675	no	-	--	-	-	-	-
Unigene0000446	18.6666666666667	27.6666666666667	1.0905	1.0699	0.8382	0.8233	1.8473	0.9320	0.999533333333333	1.20086666666667	0.264749391002952	0.683218892383321	1	no	-	--	-	-	-	-
Unigene0000447	160	224	1.4818	0.9823	2.1664	1.8889	2.4090	1.1887	1.5435	1.82886666666667	0.244744416436173	0.592035470537971	1	no	LOXL3	PREDICTED: lysyl oxidase homolog 3-like isoform X1 [Sinocyclocheilus rhinocerous]	-	-	GO:0046914//transition metal ion binding;GO:0043169//cation binding;GO:0038024//cargo receptor activity;GO:0046872//metal ion binding;GO:0005488//binding;GO:0060089//molecular transducer activity;GO:0043167//ion binding;GO:0004872//receptor activity	GO:0044699//single-organism process;GO:0008152//metabolic process;GO:0044710//single-organism metabolic process
Unigene0000448	11	19	0.5338	0.1240	0.5830	0.6650	0.6947	0.4355	0.4136	0.5984	0.532873989572702	0.478904771543141	1	no	-	--	-	-	-	-
Unigene0000449	19.6666666666667	16.6666666666667	0.7804	0.8704	0.9850	0.8484	0.3482	0.6184	0.8786	0.605	-0.538271357043443	0.377718267441027	1	no	-	--	-	-	-	-
Unigene0000450	18	14.6666666666667	2.4925	1.2870	0.8066	1.3172	0.2746	1.2264	1.5287	0.9394	-0.70249381382571	0.344962992853631	0.989319049002592	no	-	--	-	-	-	-
Unigene0000451	710.333333333333	1095.33333333333	56.6802	55.5143	58.4802	72.8862	69.3362	71.9058	56.8915666666667	71.3760666666667	0.327225590552068	0.310653250408574	0.981739320999878	no	MP68	PREDICTED: 6.8 kDa mitochondrial proteolipid [Sinocyclocheilus anshuiensis]	-	GO:0044464//cell part;GO:0005623//cell;GO:0044424//intracellular part;GO:0043227//membrane-bounded organelle;GO:0005622//intracellular;GO:0043231//intracellular membrane-bounded organelle;GO:0043229//intracellular organelle;GO:0043226//organelle	-	-
Unigene0000452	16.3333333333333	19.6666666666667	1.3363	1.6561	0.9082	0.9685	1.2588	1.4950	1.3002	1.24076666666667	-0.0675017254194991	0.962572286784064	1	no	-	--	-	-	-	-
Unigene0000453	50	42.3333333333333	2.7034	2.4261	1.2218	1.0768	0.1733	2.8680	2.1171	1.3727	-0.625073053124553	0.400203078711042	1	no	-	--	-	-	-	-
Unigene0000454	250	343.666666666667	16.8880	17.4692	23.6026	23.9988	21.8094	20.2521	19.3199333333333	22.0201	0.188730904714664	0.612805130507534	1	no	-	--	-	-	-	-
Unigene0000455	261.333333333333	266	1.6760	1.4231	2.8367	1.4897	1.6978	1.9258	1.9786	1.70443333333333	-0.215187810631611	0.594756404546272	1	no	RNF157	PREDICTED: RING finger protein 157-like isoform X1 [Sinocyclocheilus anshuiensis]	-	-	GO:0043169//cation binding;GO:0043167//ion binding;GO:0005488//binding	-
Unigene0000456	28.6666666666667	20	2.0272	2.5396	2.0537	0.7786	0.7866	2.1570	2.20683333333333	1.24073333333333	-0.830784601914929	0.162064987464606	0.898730181562041	no	-	--	-	-	-	-
Unigene0000457	29	36.3333333333333	1.9785	1.5172	0.5042	0.8066	0.1471	2.8015	1.3333	1.25173333333333	-0.0910741851994108	0.928327779915825	1	no	-	--	-	-	-	-
Unigene0000458	5.33333333333333	13.6666666666667	0.0000	0.3500	0.6033	0.7165	0.9522	0.5266	0.317766666666667	0.731766666666667	1.2034159040458	0.165125544625747	0.901263992597634	no	-	--	-	-	-	-
Unigene0000459	1067.66666666667	1184.66666666667	9.7098	9.3949	10.6485	9.2572	9.7477	8.0299	9.91773333333333	9.0116	-0.138227157132777	0.667160546384152	1	no	cdc37l1	PREDICTED: hsp90 co-chaperone Cdc37-like 1 isoform X3 [Sinocyclocheilus anshuiensis]	-	GO:0044464//cell part;GO:0005623//cell;GO:0005622//intracellular;GO:0044424//intracellular part	-	-
Unigene0000460	46.6666666666667	60	3.8134	4.7260	2.7768	3.2081	3.9162	4.4440	3.77206666666667	3.8561	0.0317872912638509	0.954583085592167	1	no	-	--	-	-	-	-
Unigene0000461	2.66666666666667	2	0.4342	0.2690	0.3161	0.0000	0.1076	0.5059	0.339766666666667	0.2045	-0.732443478473466	0.579314175065819	1	no	-	--	-	-	-	-
Unigene0000462	14.6666666666667	6.33333333333333	1.4770	1.1154	1.0083	0.2509	0.6865	0.3227	1.20023333333333	0.420033333333333	-1.51473917453282	0.030408834051926	0.613918388874088	no	-	--	-	-	-	-
Unigene0000463	18.6666666666667	35.6666666666667	0.5260	1.1735	0.8427	0.7149	2.9340	0.4414	0.8474	1.36343333333333	0.686129125902785	0.339667410424069	0.988364039424551	no	gata3	PREDICTED: trans-acting T-cell-specific transcription factor GATA-3 isoform X5 [Sinocyclocheilus grahami]	-	-	-	-
Unigene0000464	1.33333333333333	2.66666666666667	0.0000	0.1339	0.1049	0.0979	0.0536	0.2519	0.0796	0.134466666666667	0.75640824734816	0.658128826117205	1	no	-	--	-	-	-	-
Unigene0000465	7.66666666666667	7.66666666666667	0.8402	0.2603	0.7477	0.6343	0.4860	0.3916	0.616066666666667	0.503966666666667	-0.289758164067746	0.794768326755987	1	no	-	--	-	-	-	-
Unigene0000466	43.3333333333333	27.3333333333333	1.3095	1.5604	1.0024	0.6844	0.8989	0.3756	1.29076666666667	0.652966666666667	-0.983146976078126	0.0690578309605276	0.76713415008357	no	-	--	-	-	-	-
Unigene0000467	6.66666666666667	10.3333333333333	0.2809	0.8701	0.4772	0.5725	0.7658	0.7200	0.542733333333333	0.6861	0.338175348323163	0.677635000486913	1	no	-	--	-	-	-	-
Unigene0000468	3.66666666666667	8.33333333333333	0.2089	0.2588	0.2028	0.3311	0.3107	0.5842	0.2235	0.408666666666667	0.870649741786309	0.304633945454936	0.980241562861886	no	-	--	-	-	-	-
Unigene0000469	717.666666666667	1033.66666666667	21.8394	18.9136	23.6266	33.3533	24.0523	18.2277	21.4598666666667	25.2111	0.232417954182489	0.513514958497749	1	no	Zcchc10	PREDICTED: zinc finger CCHC domain-containing protein 10-like [Sinocyclocheilus anshuiensis]	-	-	GO:0005488//binding;GO:0046914//transition metal ion binding;GO:0043167//ion binding;GO:0046872//metal ion binding;GO:0043169//cation binding	-
Unigene0000470	16	12.6666666666667	2.2824	0.4243	1.1966	1.1166	0.8826	0.4469	1.3011	0.815366666666667	-0.674210965287608	0.372411650185218	0.997899994532889	no	-	--	-	-	-	-
Unigene0000471	866	1340	15.4936	17.6857	19.1382	24.0289	23.0092	19.4250	17.4391666666667	22.1543666666667	0.34525998231842	0.288683659787811	0.976108111940225	no	naa20	N-alpha-acetyltransferase 20 [Esox lucius]	-	GO:0044424//intracellular part;GO:0043229//intracellular organelle;GO:0005623//cell;GO:0005622//intracellular;GO:0044464//cell part;GO:0043226//organelle;GO:0043231//intracellular membrane-bounded organelle;GO:0043227//membrane-bounded organelle	GO:0016410//N-acyltransferase activity;GO:0016407//acetyltransferase activity;GO:0016746//transferase activity, transferring acyl groups;GO:0016747//transferase activity, transferring acyl groups other than amino-acyl groups;GO:0034212//peptide N-acetyltransferase activity;GO:0003824//catalytic activity;GO:0016740//transferase activity;GO:0008080//N-acetyltransferase activity	-
Unigene0000472	32	28.6666666666667	3.1663	4.5126	1.5370	1.4343	0.6279	4.2803	3.07196666666667	2.11416666666667	-0.539073448163015	0.443471459114837	1	no	-	--	-	-	-	-
Unigene0000473	3.33333333333333	3.33333333333333	0.6287	0.0000	0.1962	0.4272	0.0000	0.1884	0.274966666666667	0.2052	-0.422226004966997	0.829715948514413	1	no	-	--	-	-	-	-
Unigene0000474	28	22	1.6023	0.6175	0.7399	0.6373	0.5231	0.6558	0.986566666666667	0.6054	-0.704527868352771	0.231926534043267	0.947815895265116	no	-	PREDICTED: inositol hexakisphosphate and diphosphoinositol-pentakisphosphate kinase 1-like isoform X3 [Cyprinus carpio]	ko04070//Phosphatidylinositol signaling system//Signal transduction//Environmental Information Processing	-	-	-
Unigene0000475	15.3333333333333	10.3333333333333	1.5414	0.6612	0.3454	0.4431	0.4409	0.4145	0.849333333333333	0.432833333333333	-0.972519263577894	0.188257163269286	0.92032633924383	no	-	--	-	-	-	-
Unigene0000476	120.333333333333	234.666666666667	0.4892	0.7044	0.9030	0.5618	1.7933	1.1273	0.698866666666667	1.1608	0.732030282240661	0.134193583129568	0.866119281771426	no	AIM1	PREDICTED: serine-rich adhesin for platelets-like [Sinocyclocheilus anshuiensis]	-	-	-	-
Unigene0000477	138	177.666666666667	2.2829	2.9802	3.7355	3.7647	3.6434	2.2599	2.99953333333333	3.22266666666667	0.103516908346408	0.819241533886411	1	no	-	Zgc:162945 protein [Danio rerio]	-	-	-	-
Unigene0000478	87.6666666666667	98.6666666666667	1.7574	1.4899	1.2516	1.3910	1.3357	1.3099	1.49963333333333	1.34553333333333	-0.156431667050773	0.723293620119435	1	no	-	--	-	-	-	-
Unigene0000479	13	8.66666666666667	1.9544	0.6319	0.4950	0.4042	0.0632	1.0695	1.0271	0.5123	-1.00351585454721	0.273964266142404	0.968837064516613	no	-	PREDICTED: transcription factor E2-alpha-like isoform X5 [Sinocyclocheilus grahami]	-	-	-	-
Unigene0000480	30.6666666666667	32	1.7291	0.5022	0.7607	0.4650	1.1251	0.8816	0.997333333333333	0.8239	-0.275606526957794	0.671503039776432	1	no	-	--	-	-	-	-
Unigene0000481	7.33333333333333	5.66666666666667	0.3672	0.8533	0.5348	0.3119	0.2048	0.5777	0.5851	0.3648	-0.681577488654528	0.435407855279164	1	no	-	--	-	-	-	-
Unigene0000482	462.666666666667	416.333333333333	2.6040	3.8357	4.2056	2.2347	3.5380	2.2429	3.54843333333333	2.67186666666667	-0.409334186523644	0.280275630225776	0.972112667143868	no	TRIM35	PREDICTED: zinc-binding protein A33-like [Sinocyclocheilus rhinocerous]	-	-	-	-
Unigene0000483	174.666666666667	166.666666666667	3.5827	3.0129	3.1678	2.5938	1.9031	2.9972	3.25446666666667	2.49803333333333	-0.3816284095862	0.343292253301882	0.988567137348907	no	MYH6	PREDICTED: LOW QUALITY PROTEIN: myosin-7-like [Cyprinus carpio]	ko04530//Tight junction//Cellular commiunity//Cellular Processes	GO:0044464//cell part;GO:0044424//intracellular part;GO:0043228//non-membrane-bounded organelle;GO:0005856//cytoskeleton;GO:0043232//intracellular non-membrane-bounded organelle;GO:0043229//intracellular organelle;GO:0005622//intracellular;GO:0005623//cell;GO:0043226//organelle;GO:0015629//actin cytoskeleton	GO:0005488//binding;GO:0097159//organic cyclic compound binding;GO:0016787//hydrolase activity;GO:1901363//heterocyclic compound binding;GO:0097367//carbohydrate derivative binding;GO:0032549//ribonucleoside binding;GO:0016817//hydrolase activity, acting on acid anhydrides;GO:0005515//protein binding;GO:0003824//catalytic activity;GO:0036094//small molecule binding;GO:0032550//purine ribonucleosi…	GO:0048646//anatomical structure formation involved in morphogenesis;GO:0044763//single-organism cellular process;GO:0071840//cellular component organization or biogenesis;GO:0006936//muscle contraction;GO:0009653//anatomical structure morphogenesis;GO:0003012//muscle system process;GO:0022607//cellular component assembly;GO:0050879//multicellular organismal movement;GO:0044707//single-multicellu…
Unigene0000484	15	9	1.1190	0.8001	1.3789	0.4094	0.7682	0.4815	1.09933333333333	0.553033333333333	-0.991190553376008	0.121021906124975	0.854663605032819	no	-	--	-	-	-	-
Unigene0000485	2	0	0.0896	0.0833	0.2609	0.0000	0.0000	0.0000	0.1446	0.001	-7.17592374206376	0.0674212361537787	0.764516586848505	no	-	--	-	-	-	-
Unigene0000486	2366	3401.33333333333	37.4355	40.5710	53.6449	55.7177	55.7275	45.8267	43.8838	52.4239666666667	0.256538062056445	0.411359165495102	1	no	Haus7	PREDICTED: HAUS augmin-like complex subunit 7 [Sinocyclocheilus rhinocerous]	-	-	-	-
Unigene0000487	238.333333333333	366.666666666667	14.4940	16.3118	17.4568	24.8073	21.0912	14.9005	16.0875333333333	20.2663333333333	0.333141956505716	0.380125430260838	1	no	-	--	-	-	-	-
Unigene0000488	229	110.333333333333	4.1531	9.9634	3.2080	2.1355	2.0033	2.4134	5.77483333333333	2.18406666666667	-1.40276241581155	0.00395865138841332	0.2674028708476	no	RGS16	PREDICTED: regulator of G-protein signaling 16-like [Cyprinus carpio]	-	-	-	GO:0065007//biological regulation;GO:0009966//regulation of signal transduction;GO:0045744//negative regulation of G-protein coupled receptor protein signaling pathway;GO:0010646//regulation of cell communication;GO:0048523//negative regulation of cellular process;GO:0009968//negative regulation of signal transduction;GO:0010648//negative regulation of cell communication;GO:0048583//regulation of…
Unigene0000489	857.333333333333	994.333333333333	9.0792	11.1821	8.0499	7.5627	13.4386	5.6663	9.43706666666667	8.8892	-0.0862849079652675	0.824032428229233	1	no	galc	PREDICTED: galactocerebrosidase-like [Sinocyclocheilus grahami]	ko01100//Metabolic pathways//Global and Overview//Metabolism;ko04142//Lysosome//Transport and catabolism//Cellular Processes;ko00600//Sphingolipid metabolism//Lipid metabolism//Metabolism	GO:0044444//cytoplasmic part;GO:0005737//cytoplasm;GO:0044464//cell part;GO:0000323//lytic vacuole;GO:0044424//intracellular part;GO:0043226//organelle;GO:0005773//vacuole;GO:0043227//membrane-bounded organelle;GO:0005622//intracellular;GO:0043229//intracellular organelle;GO:0043231//intracellular membrane-bounded organelle;GO:0005623//cell	GO:0003824//catalytic activity;GO:0016787//hydrolase activity;GO:0016798//hydrolase activity, acting on glycosyl bonds;GO:0004553//hydrolase activity, hydrolyzing O-glycosyl compounds	GO:0006687//glycosphingolipid metabolic process;GO:0008152//metabolic process;GO:0006643//membrane lipid metabolic process;GO:1901564//organonitrogen compound metabolic process;GO:0044238//primary metabolic process;GO:0006665//sphingolipid metabolic process;GO:0019374//galactolipid metabolic process;GO:0044255//cellular lipid metabolic process;GO:0044237//cellular metabolic process;GO:1903509//li…
Unigene0000490	4.66666666666667	8	0.2702	0.4185	0.3934	0.6731	0.5358	0.3148	0.3607	0.5079	0.493745050829228	0.523608204031524	1	no	-	--	-	-	-	-
Unigene0000491	94	148	1.8876	1.9543	2.0008	2.5652	3.1273	1.8378	1.94756666666667	2.5101	0.36607212725645	0.392630739918965	1	no	Kazald1	PREDICTED: kazal-type serine protease inhibitor domain-containing protein 1 [Sinocyclocheilus anshuiensis]	-	-	-	GO:0040007//growth;GO:0016049//cell growth;GO:0044763//single-organism cellular process;GO:0009987//cellular process;GO:0044699//single-organism process
Unigene0000492	8.66666666666667	14.3333333333333	0.6059	0.4505	0.3529	0.7410	0.7209	0.3813	0.469766666666667	0.6144	0.387233868696221	0.597978520627942	1	no	-	hypothetical protein cypCar_00035167 [Cyprinus carpio]	-	-	-	-
Unigene0000493	7.33333333333333	5.33333333333333	0.3461	0.6434	0.6301	0.1176	0.6435	0.2420	0.539866666666667	0.334366666666667	-0.691172111356708	0.460558784222427	1	no	-	--	-	-	-	-
Unigene0000494	32.6666666666667	45.3333333333333	0.6783	0.4278	0.8996	0.8395	0.5044	0.9655	0.668566666666667	0.7698	0.203412244152611	0.715809719001958	1	no	tc1a	transposase [Acipenser fulvescens]	-	-	-	-
Unigene0000495	115	114	0.9280	2.2810	2.7180	1.9057	1.4569	1.6006	1.97566666666667	1.6544	-0.256031466018886	0.593869963950951	1	no	-	gag-like protein [Danio rerio]	ko01100//Metabolic pathways//Global and Overview//Metabolism;ko01110//Biosynthesis of secondary metabolites//Global and Overview//Metabolism;ko01130//Biosynthesis of antibiotics//Global and Overview//Metabolism;ko00480//Glutathione metabolism//Metabolism of other amino acids//Metabolism;ko00330//Arginine and proline metabolism//Amino acid metabolism//Metabolism	-	-	-
Unigene0000496	20	6	1.9763	1.4836	0.7195	0.2582	0.4522	0.2657	1.39313333333333	0.325366666666667	-2.09819497958601	0.00283007687141323	0.224607162117554	no	NLRC3	PREDICTED: NACHT, LRR and PYD domains-containing protein 12-like, partial [Sinocyclocheilus grahami]	ko04621//NOD-like receptor signaling pathway//Immune system//Organismal Systems	-	-	-
Unigene0000497	730.333333333333	1286.66666666667	3.0916	1.3616	3.8512	5.3433	3.7494	3.1043	2.76813333333333	4.06566666666667	0.554578501971706	0.181969400616694	0.916658218842664	no	ptprf	PREDICTED: receptor-type tyrosine-protein phosphatase F-like isoform X2 [Sinocyclocheilus rhinocerous]	ko04514//Cell adhesion molecules (CAMs)//Signaling molecules and interaction//Environmental Information Processing;ko04910//Insulin signaling pathway//Endocrine system//Organismal Systems;ko04520//Adherens junction//Cellular commiunity//Cellular Processes	-	-	-
Unigene0000498	3	6.66666666666667	0.2159	0.0000	0.1965	0.0733	0.5619	0.1510	0.137466666666667	0.262066666666667	0.930852031055984	0.491703102689862	1	no	ARL3	PREDICTED: ADP-ribosylation factor-like protein 3 [Poecilia formosa]	-	GO:0044464//cell part;GO:0005623//cell	GO:0032549//ribonucleoside binding;GO:0097159//organic cyclic compound binding;GO:0005488//binding;GO:0032550//purine ribonucleoside binding;GO:0001883//purine nucleoside binding;GO:0097367//carbohydrate derivative binding;GO:1901363//heterocyclic compound binding;GO:0036094//small molecule binding;GO:0001882//nucleoside binding	GO:0023052//signaling;GO:0007154//cell communication;GO:0048638//regulation of developmental growth;GO:0045664//regulation of neuron differentiation;GO:0044700//single organism signaling;GO:0022604//regulation of cell morphogenesis;GO:0007165//signal transduction;GO:0022603//regulation of anatomical structure morphogenesis;GO:0044767//single-organism developmental process;GO:0065008//regulation o…
Unigene0000499	13.3333333333333	6	1.1739	0.9233	1.0521	0.1841	0.6044	0.3788	1.04976666666667	0.3891	-1.43185580794264	0.0414140043416605	0.677216064233478	no	-	--	-	-	-	-
Unigene0000500	4.33333333333333	4.66666666666667	0.4195	0.0000	0.4887	0.0000	0.4368	0.4107	0.302733333333333	0.2825	-0.0997966685132641	1	1	no	-	--	-	-	-	-
Unigene0000501	4	10.6666666666667	0.1556	0.5062	0.1699	0.3172	1.0992	0.3808	0.277233333333333	0.599066666666667	1.11161582984283	0.244530639940839	0.954256641351441	no	-	--	-	-	-	-
Unigene0000502	8.66666666666667	9.33333333333333	1.0690	0.4968	0.5190	0.9080	0.3975	0.4360	0.694933333333333	0.5805	-0.259578516094049	0.765828829879814	1	no	-	--	-	-	-	-
Unigene0000503	17.3333333333333	20.6666666666667	1.5500	0.6860	1.1286	0.8024	1.4271	1.0322	1.12153333333333	1.08723333333333	-0.044810906431236	0.965348673261234	1	no	-	--	-	-	-	-
Unigene0000504	6.33333333333333	2	0.7942	0.0000	0.4206	0.1962	0.0537	0.0505	0.404933333333333	0.100133333333333	-2.01576209565319	0.111491662466053	0.837994216452931	no	-	--	-	-	-	-
Unigene0000505	8.66666666666667	0.333333333333333	0.3033	1.2688	0.2209	0.0000	0.0000	0.0530	0.597666666666667	0.0176666666666667	-5.08023931830517	0.000990955902059862	0.13336354393232	no	-	--	-	-	-	-
Unigene0000506	572.333333333333	713.333333333333	15.8194	15.4178	20.0629	16.6336	21.6068	14.8216	17.1000333333333	17.6873333333333	0.0487174162014432	0.891237717612258	1	no	fam213b	PREDICTED: prostamide/prostaglandin F synthase [Sinocyclocheilus anshuiensis]	ko01100//Metabolic pathways//Global and Overview//Metabolism;ko00590//Arachidonic acid metabolism//Lipid metabolism//Metabolism	GO:0044444//cytoplasmic part;GO:0044424//intracellular part;GO:0005737//cytoplasm;GO:0005623//cell;GO:0005622//intracellular;GO:0044464//cell part	GO:0003824//catalytic activity;GO:0016491//oxidoreductase activity;GO:0016614//oxidoreductase activity, acting on CH-OH group of donors	GO:0006631//fatty acid metabolic process;GO:0044237//cellular metabolic process;GO:0006629//lipid metabolic process;GO:0071704//organic substance metabolic process;GO:0009987//cellular process;GO:0044238//primary metabolic process;GO:0044710//single-organism metabolic process;GO:0006690//icosanoid metabolic process;GO:0043436//oxoacid metabolic process;GO:0032787//monocarboxylic acid metabolic pr…
Unigene0000507	495.666666666667	704.666666666667	9.0321	9.8048	10.2526	11.1976	12.1880	10.4783	9.6965	11.2879666666667	0.219249634371744	0.513565218042291	1	no	RNF25	PREDICTED: E3 ubiquitin-protein ligase RNF25-like isoform X1 [Sinocyclocheilus rhinocerous]	-	-	GO:0043167//ion binding;GO:0043169//cation binding;GO:0005488//binding	-
Unigene0000508	6353	8276.33333333333	41.7335	38.8636	48.7748	52.6301	43.4464	42.1092	43.1239666666667	46.0619	0.0950840344174775	0.7506403881248	1	no	ncapg2	PREDICTED: condensin-2 complex subunit G2 [Cyprinus carpio]	-	-	-	-
Unigene0000509	10.6666666666667	11	0.2232	0.3457	0.4333	0.3791	0.4426	0.0520	0.334066666666667	0.291233333333333	-0.197960547297805	0.858440521728588	1	no	-	--	-	-	-	-
Unigene0000510	208.666666666667	216.666666666667	2.7825	2.1068	3.4490	2.2306	3.1039	1.8910	2.77943333333333	2.4085	-0.206655854519474	0.61673049955585	1	no	c1galt1a	PREDICTED: glycoprotein-N-acetylgalactosamine 3-beta-galactosyltransferase 1-A-like [Sinocyclocheilus rhinocerous]	ko01100//Metabolic pathways//Global and Overview//Metabolism;ko00512//Mucin type O-glycan biosynthesis//Glycan biosynthesis and metabolism//Metabolism	GO:0016020//membrane;GO:0031224//intrinsic component of membrane;GO:0044425//membrane part	GO:0048531//beta-1,3-galactosyltransferase activity;GO:0016758//transferase activity, transferring hexosyl groups;GO:0043167//ion binding;GO:0016740//transferase activity;GO:0008378//galactosyltransferase activity;GO:0003824//catalytic activity;GO:0043169//cation binding;GO:0005488//binding;GO:0016757//transferase activity, transferring glycosyl groups	GO:0044767//single-organism developmental process;GO:0044763//single-organism cellular process;GO:0006493//protein O-linked glycosylation;GO:0006464//cellular protein modification process;GO:0009059//macromolecule biosynthetic process;GO:0044237//cellular metabolic process;GO:0071704//organic substance metabolic process;GO:0008152//metabolic process;GO:0019538//protein metabolic process;GO:000910…
Unigene0000511	22.3333333333333	7.66666666666667	0.2220	2.4250	0.6467	0.3395	0.5367	0.0388	1.0979	0.305	-1.84786550758033	0.0509223788814596	0.714912917104739	no	-	--	-	-	-	-
Unigene0000512	1458.33333333333	1991.66666666667	21.7596	17.7660	20.1077	21.4971	14.9478	29.2256	19.8777666666667	21.8901666666667	0.139127264497832	0.686271297764412	1	no	fbxo43	PREDICTED: F-box only protein 43-like [Sinocyclocheilus rhinocerous]	ko04114//Oocyte meiosis//Cell growth and death//Cellular Processes	-	-	-
Unigene0000513	9.33333333333333	5.66666666666667	0.5087	0.6080	0.6350	0.0988	0.4864	0.3049	0.5839	0.2967	-0.976716384312215	0.189850900150611	0.921300136876182	no	-	--	-	-	-	-
Unigene0000514	17	5.66666666666667	1.8259	1.0183	1.2631	0.6203	0.0000	0.4469	1.3691	0.355733333333333	-1.94435975496247	0.0175135647188799	0.505336702920775	no	-	--	-	-	-	-
Unigene0000515	44.3333333333333	51.3333333333333	5.9549	1.7648	2.6394	3.2839	1.7329	4.2845	3.45303333333333	3.10043333333333	-0.155394392641645	0.809323070023088	1	no	-	--	-	-	-	-
Unigene0000516	87.3333333333333	51	8.2633	4.7700	6.8404	2.0686	3.2990	4.0750	6.62456666666667	3.14753333333333	-1.07360442991471	0.0260223977213171	0.58457288285598	no	-	--	-	-	-	-
Unigene0000517	5.66666666666667	14.3333333333333	0.4249	0.1580	0.6188	0.8083	1.2639	0.5348	0.400566666666667	0.869	1.11731380540365	0.145193516161291	0.879694815475118	no	-	--	-	-	-	-
Unigene0000518	1686	2471.33333333333	14.2173	16.6062	17.6105	18.4817	23.9090	16.1717	16.1446666666667	19.5208	0.273954524099913	0.389305882645667	1	no	Spg7	PREDICTED: paraplegin-like isoform X3 [Sinocyclocheilus anshuiensis]	-	GO:0044425//membrane part;GO:0031224//intrinsic component of membrane;GO:0016020//membrane	GO:0032549//ribonucleoside binding;GO:0008233//peptidase activity;GO:0097367//carbohydrate derivative binding;GO:0036094//small molecule binding;GO:0001883//purine nucleoside binding;GO:0046914//transition metal ion binding;GO:0001882//nucleoside binding;GO:0097159//organic cyclic compound binding;GO:0003824//catalytic activity;GO:0043169//cation binding;GO:0043167//ion binding;GO:0004175//endope…	GO:0051604//protein maturation;GO:0016485//protein processing;GO:0019538//protein metabolic process;GO:0006508//proteolysis;GO:0008152//metabolic process;GO:0044238//primary metabolic process;GO:0043170//macromolecule metabolic process;GO:0071704//organic substance metabolic process;GO:0010467//gene expression
Unigene0000519	369.666666666667	347	26.1050	37.4284	26.4233	35.3498	20.0329	12.1688	29.9855666666667	22.5171666666667	-0.413242932451245	0.341972809015357	0.988364039424551	no	S100A4	PREDICTED: ictacalcin-like isoform X1 [Sinocyclocheilus anshuiensis]	-	-	GO:0005488//binding;GO:0046872//metal ion binding;GO:0043167//ion binding;GO:0043169//cation binding	-
Unigene0000520	20	23	1.2013	1.4449	1.0805	2.2086	0.6831	0.4941	1.24223333333333	1.1286	-0.13840193112256	0.861967704256405	1	no	-	--	-	-	-	-
Unigene0000521	30.3333333333333	15	1.6319	2.3336	1.1426	0.3838	0.8402	0.7900	1.7027	0.671333333333333	-1.34272308525348	0.0224101132989736	0.552849043346778	no	-	--	-	-	-	-
Unigene0000522	49.3333333333333	32	2.6943	6.3443	2.7467	2.1969	2.2040	1.6955	3.92843333333333	2.03213333333333	-0.950959013625793	0.0816590563287914	0.795237661962308	no	-	--	-	-	-	-
Unigene0000523	87	53.3333333333333	2.7854	0.2649	0.2264	0.5106	0.6455	0.3171	1.09223333333333	0.491066666666667	-1.15329028986981	0.14884992900624	0.883094517112534	no	-	--	-	-	-	-
Unigene0000524	39.6666666666667	46.3333333333333	2.1448	3.3440	1.8136	2.5386	3.0356	1.2578	2.43413333333333	2.27733333333333	-0.096062721780829	0.866597937179022	1	no	-	--	-	-	-	-
Unigene0000525	838.333333333333	899.666666666667	6.3309	9.8406	12.1924	6.6027	14.2039	5.1099	9.45463333333333	8.63883333333333	-0.130185018230074	0.762485128336614	1	no	MSI1	PREDICTED: RNA-binding protein Musashi homolog 1-like [Danio rerio]	ko03015//mRNA surveillance pathway//Translation//Genetic Information Processing	-	GO:0005488//binding;GO:0097159//organic cyclic compound binding	GO:0007275//multicellular organism development;GO:0044699//single-organism process;GO:0048731//system development;GO:0032502//developmental process;GO:0007399//nervous system development;GO:0032501//multicellular organismal process;GO:0048856//anatomical structure development;GO:0044707//single-multicellular organism process;GO:0044767//single-organism developmental process
Unigene0000526	9	9.66666666666667	1.0450	1.3875	1.0870	0.9129	0.8881	1.2526	1.17316666666667	1.01786666666667	-0.204859394367666	0.80923913584885	1	no	-	--	-	-	-	-
Unigene0000527	2312	3056.33333333333	88.0750	74.7317	83.4497	93.7888	76.9405	92.8042	82.0854666666667	87.8445	0.0978251473350573	0.747403824830517	1	no	DYNLRB1	PREDICTED: dynein light chain roadblock-type 1 isoform X1 [Sinocyclocheilus anshuiensis]	-	GO:0015630//microtubule cytoskeleton;GO:0043228//non-membrane-bounded organelle;GO:0005622//intracellular;GO:0044464//cell part;GO:0044424//intracellular part;GO:0043232//intracellular non-membrane-bounded organelle;GO:0005623//cell;GO:0044446//intracellular organelle part;GO:0044430//cytoskeletal part;GO:0044422//organelle part;GO:0005856//cytoskeleton;GO:0043226//organelle;GO:0005875//microtubu…	-	GO:0009987//cellular process;GO:0044699//single-organism process;GO:0023052//signaling;GO:0007154//cell communication;GO:0050789//regulation of biological process;GO:0044763//single-organism cellular process;GO:0007167//enzyme linked receptor protein signaling pathway;GO:0051716//cellular response to stimulus;GO:0007165//signal transduction;GO:0065007//biological regulation;GO:0050896//response t…
Unigene0000528	304.666666666667	298.666666666667	2.6863	2.6600	4.9442	2.4582	3.8348	2.3220	3.43016666666667	2.87166666666667	-0.256390380765771	0.536842207786605	1	no	tbx1	PREDICTED: T-box transcription factor TBX1 isoform X1 [Sinocyclocheilus anshuiensis]	-	GO:0043231//intracellular membrane-bounded organelle;GO:0005622//intracellular;GO:0005623//cell;GO:0043229//intracellular organelle;GO:0044424//intracellular part;GO:0044464//cell part;GO:0043226//organelle;GO:0043227//membrane-bounded organelle	GO:0005488//binding;GO:0003677//DNA binding;GO:0003676//nucleic acid binding;GO:0001071//nucleic acid binding transcription factor activity;GO:0005515//protein binding;GO:1901363//heterocyclic compound binding;GO:0097159//organic cyclic compound binding;GO:0046983//protein dimerization activity	GO:0003143//embryonic heart tube morphogenesis;GO:0009653//anatomical structure morphogenesis;GO:0044260//cellular macromolecule metabolic process;GO:0016070//RNA metabolic process;GO:0008152//metabolic process;GO:0006139//nucleobase-containing compound metabolic process;GO:0034641//cellular nitrogen compound metabolic process;GO:0043170//macromolecule metabolic process;GO:0071704//organic substa…
Unigene0000529	9	5.33333333333333	0.5395	0.8596	0.4490	0.4189	0.1719	0.2694	0.616033333333333	0.286733333333333	-1.10329878616009	0.163411732245187	0.899530336552184	no	-	--	-	-	-	-
Unigene0000530	7.66666666666667	5.66666666666667	0.9180	0.4266	0.5348	0.4366	0.5462	0.1284	0.626466666666667	0.3704	-0.758153649394212	0.3575930658649	0.994153127578339	no	-	--	-	-	-	-
Unigene0000531	594.666666666667	336	60.6186	34.6729	36.8641	21.2735	7.2450	29.9845	44.0518666666667	19.501	-1.17565504718308	0.0147220531283738	0.47104400565876	no	-	--	-	-	-	-
Unigene0000532	8867.33333333333	9162.33333333333	30.9398	33.3735	45.6325	23.6694	43.8198	28.0133	36.6486	31.8341666666667	-0.203182088718052	0.545447433271233	1	no	EEF2	PREDICTED: elongation factor 2 [Sinocyclocheilus anshuiensis]	-	-	-	-
Unigene0000533	1615.33333333333	1195	18.3725	7.5383	8.1287	5.2944	2.4842	11.6895	11.3465	6.48936666666667	-0.806097755388381	0.115905523618179	0.847240905331881	no	Prss56	PREDICTED: serine protease 56 [Pygocentrus nattereri]	-	-	-	-
Unigene0000534	3723.66666666667	4609.33333333333	41.6523	36.2439	45.2384	49.1614	39.7575	35.6033	41.0448666666667	41.5074	0.0161667645490085	0.95815556549878	1	no	ZNF706	PREDICTED: zinc finger protein 706 isoform X1 [Sinocyclocheilus rhinocerous]	-	-	-	-
Unigene0000535	34.6666666666667	27.6666666666667	2.1538	1.2915	2.6813	1.6051	1.3433	1.1173	2.0422	1.35523333333333	-0.591582896693574	0.271912600013093	0.967411621777997	no	-	--	-	-	-	-
Unigene0000536	523.333333333333	422.333333333333	9.7154	3.8596	4.9722	5.4907	4.0781	2.1937	6.1824	3.92083333333333	-0.657006682166307	0.146145353443637	0.881088357469277	no	CRISPLD1	PREDICTED: cysteine-rich secretory protein LCCL domain-containing 1-like [Sinocyclocheilus anshuiensis]	-	-	-	-
Unigene0000537	48.3333333333333	45	3.5481	2.5962	3.3531	2.5647	3.0315	1.6363	3.1658	2.41083333333333	-0.393038198394429	0.422923143136241	1	no	-	--	-	-	-	-
Unigene0000538	8	1.66666666666667	0.3839	0.7136	0.2795	0.0000	0.1427	0.0895	0.459	0.0774	-2.56808868215676	0.00845157586169575	0.37513572336936	no	-	--	-	-	-	-
Unigene0000539	23.6666666666667	16	1.3019	0.9351	1.3789	0.4825	1.2323	0.3310	1.2053	0.681933333333333	-0.821689667379733	0.211154777156677	0.933246598185309	no	-	--	-	-	-	-
Unigene0000540	2.66666666666667	3	0.0898	0.5009	0.0654	0.1220	0.1336	0.3140	0.2187	0.189866666666667	-0.203966574802849	1	1	no	-	--	-	-	-	-
Unigene0000541	678.333333333333	513	12.3521	6.5835	7.1807	4.9301	3.5972	7.0363	8.70543333333333	5.18786666666667	-0.746774711819815	0.0618106213629923	0.753306563012449	no	ZNF271	PREDICTED: zinc finger protein 239-like isoform X1 [Sinocyclocheilus grahami]	-	-	-	-
Unigene0000542	850.333333333333	1165	2.6170	2.5524	2.9416	3.0380	3.3524	2.7294	2.70366666666667	3.03993333333333	0.169122391637382	0.602386733321016	1	no	aasdh	PREDICTED: acyl-CoA synthetase family member 4 isoform X1 [Sinocyclocheilus anshuiensis]	-	-	GO:0097159//organic cyclic compound binding;GO:0032550//purine ribonucleoside binding;GO:0001882//nucleoside binding;GO:1901363//heterocyclic compound binding;GO:0097367//carbohydrate derivative binding;GO:0036094//small molecule binding;GO:0001883//purine nucleoside binding;GO:0032549//ribonucleoside binding;GO:0016877//ligase activity, forming carbon-sulfur bonds;GO:0016874//ligase activity;GO:…	GO:0044281//small molecule metabolic process;GO:0032787//monocarboxylic acid metabolic process;GO:0044699//single-organism process;GO:0044710//single-organism metabolic process;GO:0044238//primary metabolic process;GO:0044763//single-organism cellular process;GO:0006082//organic acid metabolic process;GO:0071704//organic substance metabolic process;GO:0044237//cellular metabolic process;GO:000998…
Unigene0000543	19.3333333333333	32	0.4614	0.5718	0.8398	1.3062	0.4860	0.7796	0.624333333333333	0.857266666666667	0.457427554038547	0.452986118245257	1	no	-	PREDICTED: uncharacterized protein LOC107715642 [Sinocyclocheilus rhinocerous]	-	-	-	-
Unigene0000544	18.6666666666667	15.6666666666667	1.7251	0.6751	1.9173	0.6169	1.4855	0.9523	1.43916666666667	1.01823333333333	-0.499165476847514	0.47588021093576	1	no	-	--	-	-	-	-
Unigene0000545	2.33333333333333	4.66666666666667	0.0000	0.3020	0.1774	0.4415	0.1208	0.2272	0.1598	0.263166666666667	0.719709357098468	0.673180473480775	1	no	-	--	-	-	-	-
Unigene0000546	19.6666666666667	17.3333333333333	0.7509	1.5820	0.3645	0.5102	1.0796	0.2800	0.899133333333333	0.623266666666667	-0.528685513125086	0.471343673173874	1	no	-	--	-	-	-	-
Unigene0000547	556.666666666667	469.666666666667	11.4587	7.0656	8.8891	6.7555	3.3139	8.3788	9.1378	6.1494	-0.571401213622343	0.164370694484495	0.900717216224538	no	-	PREDICTED: dynein light chain 1, cytoplasmic-like [Cyprinus carpio]	-	-	-	-
Unigene0000548	2.66666666666667	3	0.2773	0.1289	0.5048	0.4711	0.0000	0.3878	0.303666666666667	0.2863	-0.0849608829689054	1	1	no	-	--	-	-	-	-
Unigene0000549	30.3333333333333	18	3.1226	2.2470	2.6405	1.6427	1.0487	1.1269	2.67003333333333	1.27276666666667	-1.0688897953987	0.0503927605935386	0.712283799823596	no	-	--	-	-	-	-
Unigene0000550	978.666666666667	1099.33333333333	5.1942	5.7613	5.9227	4.9031	5.7471	4.8875	5.62606666666667	5.17923333333333	-0.119388092304285	0.711417068816221	1	no	PLEKHM3	PREDICTED: pleckstrin homology domain-containing family M member 3-like isoform X1 [Sinocyclocheilus rhinocerous]	-	-	-	-
Unigene0000551	140.333333333333	106.666666666667	27.5479	6.2569	6.7870	3.5185	4.8520	14.9897	13.5306	7.78673333333333	-0.797135690218054	0.230039905074274	0.946394205993412	no	-	--	-	-	-	-
Unigene0000552	1228	1381.66666666667	8.9626	6.4785	8.8777	8.3775	5.1493	8.6637	8.10626666666667	7.39683333333333	-0.132129866471268	0.705178044951414	1	no	AP3B2	PREDICTED: AP-3 complex subunit beta-2 isoform X4 [Sinocyclocheilus rhinocerous]	ko04142//Lysosome//Transport and catabolism//Cellular Processes	GO:0044464//cell part;GO:0030117//membrane coat;GO:0048475//coated membrane;GO:0044425//membrane part;GO:0032991//macromolecular complex;GO:0005623//cell;GO:0044444//cytoplasmic part;GO:0044424//intracellular part;GO:0030119//AP-type membrane coat adaptor complex;GO:0043234//protein complex;GO:0005622//intracellular;GO:0016020//membrane;GO:0005737//cytoplasm;GO:0098796//membrane protein complex	-	GO:0051179//localization;GO:0006810//transport;GO:0051234//establishment of localization
Unigene0000553	5.33333333333333	4.66666666666667	0.5939	0.4416	0.6054	0.0807	0.9717	0.1661	0.546966666666667	0.406166666666667	-0.429381069508807	0.693953839953347	1	no	-	PREDICTED: uncharacterized protein LOC109112128 [Cyprinus carpio]	-	-	-	-
Unigene0000554	176.333333333333	209.666666666667	1.5577	2.1663	1.7490	0.9453	2.6971	1.7211	1.82433333333333	1.78783333333333	-0.0291571049745998	0.951399546233617	1	no	pol	PREDICTED: olfactory receptor 52D1-like [Fundulus heteroclitus]	-	-	-	-
Unigene0000555	2595.66666666667	2695.66666666667	24.7955	24.1480	21.9521	19.1359	18.8646	21.3341	23.6318666666667	19.7782	-0.256822457994345	0.39182161559541	1	no	-	Uncharacterized protein C3orf30 [Cricetulus griseus]	-	-	-	-
Unigene0000556	15.3333333333333	11.6666666666667	2.2855	1.4484	0.6808	0.8471	0.9271	0.7991	1.47156666666667	0.857766666666667	-0.778695744278295	0.253402989525297	0.959659974638909	no	-	PREDICTED: regucalcin isoform X1 [Oreochromis niloticus]	-	-	-	-
Unigene0000557	0	0	0.0000	0.0000	0.0000	0.0000	0.0000	0.0000	0.001	0.001	0	notest	notest	notest	-	--	-	-	-	-
Unigene0000558	130.333333333333	97.6666666666667	6.8622	3.4893	3.7623	2.5782	0.9006	4.7700	4.7046	2.7496	-0.774850308841238	0.174605636538402	0.910640943581616	no	ccdc176	PREDICTED: basal body-orientation factor 1-like [Cyprinus carpio]	-	-	-	-
Unigene0000559	36.6666666666667	31	3.9666	3.4490	4.6586	2.1736	2.8547	3.3998	4.02473333333333	2.80936666666667	-0.518648266566815	0.300964779377862	0.97967753014196	no	-	PREDICTED: RNA-directed DNA polymerase from mobile element jockey-like, partial [Larimichthys crocea]	-	-	-	-
Unigene0000560	569.666666666667	992	3.9228	6.6475	6.8188	8.4352	8.1558	8.5381	5.79636666666667	8.37636666666667	0.531175736303171	0.13499987370288	0.867152735192881	no	AKAP17A	PREDICTED: A-kinase anchor protein 17A [Pygocentrus nattereri]	-	GO:0044424//intracellular part;GO:0005623//cell;GO:0044428//nuclear part;GO:0044446//intracellular organelle part;GO:0031974//membrane-enclosed lumen;GO:0016604//nuclear body;GO:0005654//nucleoplasm;GO:0044464//cell part;GO:0005634//nucleus;GO:0070013//intracellular organelle lumen;GO:0043233//organelle lumen;GO:0005622//intracellular;GO:0043231//intracellular membrane-bounded organelle;GO:004445…	GO:0005515//protein binding;GO:0097159//organic cyclic compound binding;GO:0005488//binding	GO:0010467//gene expression;GO:0006396//RNA processing;GO:0006807//nitrogen compound metabolic process;GO:0044238//primary metabolic process;GO:0006139//nucleobase-containing compound metabolic process;GO:0044260//cellular macromolecule metabolic process;GO:0034641//cellular nitrogen compound metabolic process;GO:0090304//nucleic acid metabolic process;GO:1901360//organic cyclic compound metaboli…
Unigene0000561	71	75.6666666666667	0.8977	0.9876	1.4140	0.6597	0.9809	1.3066	1.09976666666667	0.9824	-0.162814999246498	0.734680539122694	1	no	nkd2l	PREDICTED: protein naked cuticle homolog 2-like [Sinocyclocheilus anshuiensis]	ko04310//Wnt signaling pathway//Signal transduction//Environmental Information Processing	GO:0044464//cell part;GO:0016020//membrane;GO:0005623//cell	-	GO:0032502//developmental process;GO:0050794//regulation of cellular process;GO:0009653//anatomical structure morphogenesis;GO:0009966//regulation of signal transduction;GO:0023051//regulation of signaling;GO:0048583//regulation of response to stimulus;GO:0023057//negative regulation of signaling;GO:0048856//anatomical structure development;GO:0065007//biological regulation;GO:0048646//anatomical…
Unigene0000562	1876	2990.33333333333	40.5083	47.8252	57.2929	68.6877	74.3867	49.5675	48.5421333333333	64.2139666666667	0.403649606992485	0.210628671726307	0.933242411519553	no	Ppif	PREDICTED: peptidyl-prolyl cis-trans isomerase A-like [Sinocyclocheilus grahami]	ko04020//Calcium signaling pathway//Signal transduction//Environmental Information Processing	-	GO:0016859//cis-trans isomerase activity;GO:0016853//isomerase activity;GO:0003824//catalytic activity	GO:0008152//metabolic process;GO:0044238//primary metabolic process;GO:0044267//cellular protein metabolic process;GO:0009987//cellular process;GO:0071704//organic substance metabolic process;GO:0043170//macromolecule metabolic process;GO:0019538//protein metabolic process;GO:0044237//cellular metabolic process;GO:0044260//cellular macromolecule metabolic process
Unigene0000563	25.3333333333333	20.3333333333333	1.0140	1.3889	1.1269	0.4351	0.5556	1.3060	1.1766	0.765566666666667	-0.620024021058437	0.318665591721344	0.983637672793721	no	-	--	-	-	-	-
Unigene0000564	15.3333333333333	9.33333333333333	0.7857	0.9958	1.0401	0.3397	0.4249	0.6492	0.940533333333333	0.471266666666667	-0.996935433866669	0.123031481569205	0.856502883426191	no	-	PREDICTED: neuron navigator 3-like [Poecilia mexicana]	-	-	-	-
Unigene0000565	26.6666666666667	23.6666666666667	0.6857	0.7284	0.8321	0.5324	0.3642	0.7306	0.748733333333333	0.5424	-0.465094805657598	0.405486895550977	1	no	-	--	-	-	-	-
Unigene0000566	11.3333333333333	15	0.7959	0.7398	0.6323	0.6392	0.1614	1.4673	0.722666666666667	0.755966666666667	0.0649922712935042	0.960156334322196	1	no	-	--	-	-	-	-
Unigene0000567	94.6666666666667	86	3.3429	2.0331	4.5077	2.6080	2.9464	1.9912	3.29456666666667	2.5152	-0.389415597770509	0.409504144134875	1	no	-	--	-	-	-	-
Unigene0000568	211.333333333333	219	1.0511	0.7914	1.3254	0.5506	0.7991	1.3795	1.05596666666667	0.909733333333333	-0.215048673671102	0.631508618216694	1	no	CUX2	PREDICTED: homeobox protein cut-like 2 [Sinocyclocheilus anshuiensis]	-	-	-	-
Unigene0000569	989.333333333333	1099	4.2162	4.4888	3.6862	2.6097	4.4115	4.1247	4.1304	3.7153	-0.152802794187537	0.658624178048183	1	no	Apbb2	PREDICTED: amyloid beta A4 precursor protein-binding family B member 2-like isoform X4 [Sinocyclocheilus grahami]	-	-	-	-
Unigene0000570	1883	2376.66666666667	44.9012	38.8054	21.6268	47.1916	7.9343	46.6619	35.1111333333333	33.9292666666667	-0.0493983163816842	0.925211669608318	1	no	PIM3	PREDICTED: serine/threonine-protein kinase 33-like [Cyprinus carpio]	-	-	-	-
Unigene0000571	34.6666666666667	38.6666666666667	2.0858	3.1593	1.8563	2.3620	3.5043	0.5402	2.36713333333333	2.1355	-0.14856707295144	0.820026272995698	1	no	-	PREDICTED: probable serine/threonine-protein kinase clkA [Sinocyclocheilus grahami]	-	-	-	-
Unigene0000572	6	18	1.2184	0.4530	0.3549	1.8213	2.1746	0.6815	0.675433333333333	1.55913333333333	1.20685902441515	0.110909357886004	0.837286057967431	no	-	PREDICTED: probable serine/threonine-protein kinase clkA [Sinocyclocheilus grahami]	-	-	-	-
Unigene0000573	41	119	1.8645	2.0685	2.4088	3.5555	9.3482	2.5654	2.11393333333333	5.15636666666667	1.28642497720257	0.019958870644477	0.528791334128769	no	-	PREDICTED: mucin-2-like [Sinocyclocheilus anshuiensis]	-	-	-	-
Unigene0000574	42	60.3333333333333	3.1069	3.3003	1.9391	2.8650	5.8312	0.9310	2.7821	3.20906666666667	0.205979484014094	0.7489980523717	1	no	-	PREDICTED: mucin-2-like [Sinocyclocheilus anshuiensis]	-	-	-	-
Unigene0000575	64	85	1.6877	3.1374	1.6758	1.9026	4.3928	0.7510	2.16696666666667	2.3488	0.116246911927041	0.855569972068487	1	no	MUC5B	PREDICTED: mucin-2 [Danio rerio]	-	-	-	-
Unigene0000576	27.3333333333333	45	1.1234	0.8069	1.5988	1.4573	1.9747	1.4639	1.17636666666667	1.63196666666667	0.472273780251768	0.372238780106084	0.997899994532889	no	-	PREDICTED: transmembrane protein 182 isoform X1 [Hippocampus comes]	-	-	-	-
Unigene0000577	0	0	0.0000	0.0000	0.0000	0.0000	0.0000	0.0000	0.001	0.001	0	notest	notest	notest	-	--	-	-	-	-
Unigene0000578	25.3333333333333	23.3333333333333	1.4380	1.5796	1.3327	0.9327	1.5555	0.7770	1.4501	1.0884	-0.413943531318951	0.465261363703142	1	no	-	--	-	-	-	-
Unigene0000579	2	0.333333333333333	0.5617	0.2610	0.0000	0.0000	0.1044	0.0000	0.274233333333333	0.0348	-2.97824473160042	0.188069486468721	0.920268860540914	no	-	--	-	-	-	-
Unigene0000580	0	0	0.0000	0.0000	0.0000	0.0000	0.0000	0.0000	0.001	0.001	0	notest	notest	notest	-	--	-	-	-	-
Unigene0000581	37.6666666666667	72.3333333333333	1.0159	1.0094	1.3520	2.2851	2.2926	0.8083	1.12576666666667	1.79533333333333	0.673343892576254	0.217725132833529	0.938361559658451	no	-	--	-	-	-	-
Unigene0000582	27	23.6666666666667	2.6742	1.2428	2.7122	2.3362	1.2074	1.2020	2.20973333333333	1.58186666666667	-0.482244276079637	0.421955750740869	1	no	-	--	-	-	-	-
Unigene0000583	209.333333333333	202	11.8805	11.9467	13.7605	9.0167	11.4184	9.4245	12.5292333333333	9.9532	-0.3320658000201	0.382492683724499	1	no	-	--	-	-	-	-
Unigene0000584	74.6666666666667	10.6666666666667	3.9210	1.6475	4.6151	0.4015	0.3195	0.4882	3.39453333333333	0.403066666666667	-3.07412286888551	3.92715291122147e-07	0.000647435784152486	yes	-	--	-	-	-	-
Unigene0000585	4	2.66666666666667	0.5099	0.1185	0.6497	0.1732	0.0948	0.4456	0.426033333333333	0.237866666666667	-0.840813198433639	0.463564709135365	1	no	-	--	-	-	-	-
Unigene0000586	1397.33333333333	1637	11.0662	13.5413	16.8530	10.1522	23.5203	7.3960	13.8201666666667	13.6895	-0.0137052601901139	0.974472406978951	1	no	PGR	PREDICTED: LOW QUALITY PROTEIN: progesterone receptor-like [Cyprinus carpio]	ko04114//Oocyte meiosis//Cell growth and death//Cellular Processes;ko04914//Progesterone-mediated oocyte maturation//Endocrine system//Organismal Systems	GO:0043226//organelle;GO:0043231//intracellular membrane-bounded organelle;GO:0005623//cell;GO:0005622//intracellular;GO:0044424//intracellular part;GO:0043229//intracellular organelle;GO:0043227//membrane-bounded organelle;GO:0044464//cell part	GO:0003677//DNA binding;GO:0060089//molecular transducer activity;GO:0001071//nucleic acid binding transcription factor activity;GO:0043167//ion binding;GO:0003676//nucleic acid binding;GO:1901363//heterocyclic compound binding;GO:0046914//transition metal ion binding;GO:0043169//cation binding;GO:0005488//binding;GO:0097159//organic cyclic compound binding;GO:0038023//signaling receptor activity…	GO:0023052//signaling;GO:0009725//response to hormone;GO:0071495//cellular response to endogenous stimulus;GO:0050896//response to stimulus;GO:0018130//heterocycle biosynthetic process;GO:0044238//primary metabolic process;GO:0006807//nitrogen compound metabolic process;GO:0007154//cell communication;GO:0007165//signal transduction;GO:1901576//organic substance biosynthetic process;GO:0042221//re…
Unigene0000587	669	712.333333333333	77.9224	64.6076	16.8301	52.5424	15.9878	57.8718	53.1200333333333	42.134	-0.33427116703637	0.546324457229016	1	no	-	--	-	-	-	-
Unigene0000588	34.6666666666667	41.3333333333333	1.4792	1.0802	0.7437	0.6461	0.8119	1.6253	1.10103333333333	1.02776666666667	-0.0993453791658837	0.873053312270836	1	no	-	--	-	-	-	-
Unigene0000589	557	695	4.9739	5.5182	5.8411	5.3967	7.3472	4.0562	5.4444	5.60003333333333	0.0406623490927133	0.912037744322178	1	no	Znf319	PREDICTED: zinc finger protein 319-like [Danio rerio]	-	-	-	-
Unigene0000590	20	22.3333333333333	1.2480	0.7733	1.5145	0.8009	1.5983	0.9211	1.1786	1.10676666666667	-0.0907230723309758	0.905009206392524	1	no	-	--	-	-	-	-
Unigene0000591	15.3333333333333	17.6666666666667	1.0066	1.1515	0.9585	1.4732	0.4031	0.9745	1.03886666666667	0.950266666666667	-0.128606174682538	0.88723284625785	1	no	-	--	-	-	-	-
Unigene0000592	1449.66666666667	1699.33333333333	14.6167	16.0068	16.8580	15.1038	13.9917	16.3737	15.8271666666667	15.1564	-0.0624758911847859	0.841851267689912	1	no	spop	speckle-type POZ protein [Danio rerio]	-	GO:1902494//catalytic complex;GO:0005622//intracellular;GO:0043234//protein complex;GO:0005634//nucleus;GO:0043233//organelle lumen;GO:0043229//intracellular organelle;GO:0000151//ubiquitin ligase complex;GO:0070013//intracellular organelle lumen;GO:0044422//organelle part;GO:0044464//cell part;GO:0031974//membrane-enclosed lumen;GO:0043226//organelle;GO:0044446//intracellular organelle part;GO:0…	GO:0005515//protein binding;GO:0005488//binding;GO:0044389//ubiquitin-like protein ligase binding;GO:0019899//enzyme binding	GO:0036211//protein modification process;GO:0071704//organic substance metabolic process;GO:0048583//regulation of response to stimulus;GO:0033500//carbohydrate homeostasis;GO:0016567//protein ubiquitination;GO:0051603//proteolysis involved in cellular protein catabolic process;GO:0006464//cellular protein modification process;GO:0044248//cellular catabolic process;GO:0043067//regulation of progr…
Unigene0000593	208	67.6666666666667	23.6717	6.4925	12.9417	3.3751	4.5019	3.3104	14.3686333333333	3.72913333333333	-1.9460105609736	0.000155555100194451	0.0420315677533673	yes	-	--	-	-	-	-
Unigene0000594	218	188.666666666667	2.8235	4.6550	4.1120	2.0306	4.8585	1.4987	3.8635	2.79593333333333	-0.466578436673462	0.335762186764391	0.988364039424551	no	-	--	-	-	-	-
Unigene0000595	330.333333333333	313.333333333333	12.6819	13.9745	8.5956	7.7770	6.4060	12.1858	11.7506666666667	8.7896	-0.41887319216999	0.299024648042405	0.978762659211149	no	-	--	-	-	-	-
Unigene0000596	58.3333333333333	19.3333333333333	0.3596	0.8355	6.7202	1.1809	0.8913	0.3771	2.63843333333333	0.816433333333333	-1.69227453963911	0.055868836412041	0.735460232828176	no	-	PREDICTED: polyglutamine-binding protein 1-like [Acanthisitta chloris]	-	-	-	-
Unigene0000597	19.6666666666667	34.3333333333333	1.2311	0.8239	0.5737	0.6692	1.8310	1.1362	0.876233333333333	1.21213333333333	0.468161399136786	0.44096799707076	1	no	Tf2-9	PREDICTED: RNA-directed DNA polymerase homolog, partial [Danio rerio]	-	-	-	-
Unigene0000598	3440.33333333333	3286.66666666667	79.8070	51.5449	40.5694	38.2596	16.8567	72.3510	57.3071	42.4891	-0.431621106219499	0.344467174452339	0.989062420572266	no	dnaaf2	PREDICTED: protein kintoun isoform X2 [Sinocyclocheilus grahami]	-	-	-	-
Unigene0000599	31.3333333333333	16.6666666666667	3.3990	2.9618	2.4750	1.2270	0.3950	2.0796	2.94526666666667	1.23386666666667	-1.25521175937248	0.0468877453592873	0.697700895323103	no	-	PREDICTED: serine/arginine repetitive matrix protein 2-like isoform X1 [Hippocampus comes]	-	-	-	-
Unigene0000600	23	12.6666666666667	4.3673	1.0745	2.4319	1.0474	0.2866	2.0658	2.62456666666667	1.13326666666667	-1.21159186520612	0.110461900141371	0.836532973762981	no	-	--	-	-	-	-
Unigene0000601	36.3333333333333	36.6666666666667	3.2251	5.1683	2.4293	0.9068	4.3005	3.5770	3.60756666666667	2.9281	-0.301061230348956	0.640658424965999	1	no	-	PREDICTED: protein NLRC5-like, partial [Sinocyclocheilus grahami]	-	-	-	-
Unigene0000602	118	96	5.7549	1.6232	4.7685	3.4249	1.9480	2.6364	4.04886666666667	2.66976666666667	-0.6008044761836	0.249259209859257	0.956356088688402	no	-	PREDICTED: uncharacterized protein LOC107741621 [Sinocyclocheilus rhinocerous]	-	-	-	-
Unigene0000603	514.333333333333	328.333333333333	7.3010	4.8331	5.8392	2.2410	3.1153	3.9241	5.9911	3.09346666666667	-0.953596425918366	0.0116641122370559	0.431292303631248	no	-	PREDICTED: protein NLRC5-like, partial [Sinocyclocheilus grahami]	-	-	-	-
Unigene0000604	36.6666666666667	36	1.5033	0.9844	0.8707	0.9054	0.5844	1.0989	1.11946666666667	0.8629	-0.375546288269851	0.491510595137185	1	no	-	--	-	-	-	-
Unigene0000605	86	67	2.0507	1.9296	1.7513	1.2902	1.4121	0.9028	1.91053333333333	1.2017	-0.668898651340593	0.132022059846511	0.863966815634151	no	MRAS	PREDICTED: ras-related protein M-Ras-like [Sinocyclocheilus anshuiensis]	ko04010//MAPK signaling pathway//Signal transduction//Environmental Information Processing;ko04810//Regulation of actin cytoskeleton//Cell motility//Cellular Processes;ko04530//Tight junction//Cellular commiunity//Cellular Processes	-	GO:0005488//binding;GO:0097367//carbohydrate derivative binding;GO:1901363//heterocyclic compound binding;GO:0032550//purine ribonucleoside binding;GO:0001883//purine nucleoside binding;GO:0001882//nucleoside binding;GO:0097159//organic cyclic compound binding;GO:0036094//small molecule binding;GO:0003824//catalytic activity;GO:0032549//ribonucleoside binding	GO:1901135//carbohydrate derivative metabolic process;GO:0044700//single organism signaling;GO:0019693//ribose phosphate metabolic process;GO:0034655//nucleobase-containing compound catabolic process;GO:0009056//catabolic process;GO:0055086//nucleobase-containing small molecule metabolic process;GO:1901575//organic substance catabolic process;GO:0046483//heterocycle metabolic process;GO:0072521//…
Unigene0000606	2065	2793	11.2927	11.2789	12.3866	12.8492	13.3784	12.4420	11.6527333333333	12.8898666666667	0.145568938909496	0.627042400633617	1	no	SOS1	PREDICTED: son of sevenless homolog 1 isoform X1 [Pygocentrus nattereri]	ko04010//MAPK signaling pathway//Signal transduction//Environmental Information Processing;ko04510//Focal adhesion//Cellular commiunity//Cellular Processes;ko04810//Regulation of actin cytoskeleton//Cell motility//Cellular Processes;ko04068//FoxO signaling pathway//Signal transduction//Environmental Information Processing;ko04910//Insulin signaling pathway//Endocrine system//Organismal Systems;ko…	-	-	-
Unigene0000607	83.6666666666667	79.3333333333333	2.0676	1.6198	2.6239	1.5253	1.9549	1.5077	2.10376666666667	1.66263333333333	-0.33950466022097	0.451026668315785	1	no	hoxb7a	PREDICTED: homeobox protein Hox-B7a-like [Sinocyclocheilus anshuiensis]	-	GO:0043227//membrane-bounded organelle;GO:0043226//organelle;GO:0044464//cell part;GO:0005622//intracellular;GO:0005623//cell;GO:0043229//intracellular organelle;GO:0043231//intracellular membrane-bounded organelle;GO:0044424//intracellular part	GO:0001071//nucleic acid binding transcription factor activity;GO:0003676//nucleic acid binding;GO:1901363//heterocyclic compound binding;GO:0005488//binding;GO:0003677//DNA binding;GO:0097159//organic cyclic compound binding	GO:0006139//nucleobase-containing compound metabolic process;GO:0043170//macromolecule metabolic process;GO:0032774//RNA biosynthetic process;GO:0008152//metabolic process;GO:0044238//primary metabolic process;GO:0018130//heterocycle biosynthetic process;GO:0006725//cellular aromatic compound metabolic process;GO:0009059//macromolecule biosynthetic process;GO:0097659//nucleic acid-templated trans…
Unigene0000608	926.666666666667	964.333333333333	10.9530	9.2136	9.5795	9.9037	7.8905	7.1451	9.91536666666667	8.3131	-0.254279557658434	0.44374574230288	1	no	ZNF34	PREDICTED: zinc finger protein 501-like isoform X2 [Sinocyclocheilus grahami]	-	-	GO:0097159//organic cyclic compound binding;GO:0043169//cation binding;GO:0005488//binding;GO:0043167//ion binding	-
Unigene0000609	65	46.6666666666667	2.3767	1.5868	1.7794	0.7734	1.1202	1.4278	1.9143	1.10713333333333	-0.789987961857568	0.108063473347229	0.833280796224676	no	-	--	-	-	-	-
Unigene0000610	68.3333333333333	54	1.3890	1.9623	1.5980	1.3401	0.6404	1.1654	1.64976666666667	1.04863333333333	-0.653751681335178	0.183933972685193	0.918358660250374	no	eif4e1b	PREDICTED: eukaryotic translation initiation factor 4E-1B-like isoform X2 [Cyprinus carpio]	ko03013//RNA transport//Translation//Genetic Information Processing;ko04910//Insulin signaling pathway//Endocrine system//Organismal Systems;ko04150//mTOR signaling pathway//Signal transduction//Environmental Information Processing	GO:0043231//intracellular membrane-bounded organelle;GO:0044424//intracellular part;GO:0034518//RNA cap binding complex;GO:0043229//intracellular organelle;GO:0043227//membrane-bounded organelle;GO:0005623//cell;GO:0043234//protein complex;GO:0044464//cell part;GO:0043226//organelle;GO:0005622//intracellular;GO:0032991//macromolecular complex	GO:1901363//heterocyclic compound binding;GO:0097159//organic cyclic compound binding;GO:0003723//RNA binding;GO:0005488//binding;GO:0003676//nucleic acid binding;GO:0008135//translation factor activity, RNA binding	GO:0044238//primary metabolic process;GO:0071704//organic substance metabolic process;GO:0044260//cellular macromolecule metabolic process;GO:0034645//cellular macromolecule biosynthetic process;GO:0044237//cellular metabolic process;GO:0006518//peptide metabolic process;GO:0044267//cellular protein metabolic process;GO:0006412//translation;GO:1901564//organonitrogen compound metabolic process;GO…
Unigene0000611	10.6666666666667	36.6666666666667	0.5774	0.5366	0.5045	2.1577	0.6011	1.6552	0.5395	1.47133333333333	1.44742926407044	0.0242698664466409	0.569477019226274	no	-	--	-	-	-	-
Unigene0000612	48.3333333333333	41	1.6236	7.9893	2.6426	1.2330	5.1137	2.1369	4.08516666666667	2.82786666666667	-0.53068083968139	0.446834021363248	1	no	-	--	-	-	-	-
Unigene0000613	223.666666666667	173.333333333333	3.7561	3.6921	2.4930	1.8746	3.0158	1.2783	3.31373333333333	2.05623333333333	-0.688453523745804	0.116147742758258	0.847240905331881	no	GIMAP7	PREDICTED: GTPase IMAP family member 7-like [Sinocyclocheilus rhinocerous]	-	-	GO:1901363//heterocyclic compound binding;GO:0097159//organic cyclic compound binding;GO:0032550//purine ribonucleoside binding;GO:0036094//small molecule binding;GO:0097367//carbohydrate derivative binding;GO:0005488//binding;GO:0001882//nucleoside binding;GO:0032549//ribonucleoside binding;GO:0001883//purine nucleoside binding	-
Unigene0000614	1281.33333333333	1404.66666666667	11.2284	11.8383	9.7844	8.3567	9.7177	10.9331	10.9503666666667	9.66916666666667	-0.179515716373897	0.576705888018615	1	no	gag-pol	PREDICTED: protein NYNRIN-like [Oreochromis niloticus]	-	-	-	-
Unigene0000615	1825.66666666667	1824.33333333333	13.2284	13.0635	9.2969	7.4133	10.9305	10.0779	11.8629333333333	9.4739	-0.324430438461013	0.324373515576036	0.98600369575474	no	pol	PREDICTED: protein NYNRIN-like [Oreochromis niloticus]	-	-	-	-
Unigene0000616	337.666666666667	327.333333333333	9.3434	8.8531	8.5649	6.3487	6.3862	8.2245	8.92046666666667	6.98646666666667	-0.352556173562019	0.327643046868616	0.986420158823011	no	CRYBA2	PREDICTED: beta-crystallin A2-like [Sinocyclocheilus rhinocerous]	-	-	-	-
Unigene0000617	34.3333333333333	43.6666666666667	3.1069	3.2488	4.9017	3.3425	5.1023	3.6207	3.75246666666667	4.02183333333333	0.100014040543611	0.879844120159558	1	no	-	PREDICTED: zinc finger protein ZFP69-like isoform X1 [Ictalurus punctatus]	-	-	-	-
Unigene0000618	0.666666666666667	1	0.0000	0.1817	0.0000	0.1993	0.0000	0.0000	0.0605666666666667	0.0664333333333333	0.133383290604941	1	1	no	-	--	-	-	-	-
Unigene0000619	17	19	0.9671	0.9589	0.9390	0.5695	0.7192	1.3074	0.955	0.865366666666667	-0.142189182946564	0.852703597133844	1	no	-	--	-	-	-	-
Unigene0000620	0	0.333333333333333	0.0000	0.0000	0.0000	0.0000	0.0000	0.0986	0.001	0.0328666666666667	5.03855324076939	1	1	no	-	--	-	-	-	-
Unigene0000621	159.333333333333	197.333333333333	4.3154	3.3462	2.5347	3.6774	2.9787	3.2842	3.39876666666667	3.31343333333333	-0.0366844283549809	0.936016021008044	1	no	-	PREDICTED: L-rhamnose-binding lectin CSL2-like [Sinocyclocheilus rhinocerous]	-	-	-	-
Unigene0000622	136	159.666666666667	2.1522	2.7385	2.4953	1.7890	3.6673	1.7094	2.462	2.38856666666667	-0.0436856177629673	0.923848430105932	1	no	SLC25A15	PREDICTED: mitochondrial ornithine transporter 1-like [Sinocyclocheilus grahami]	-	GO:0044425//membrane part;GO:0031224//intrinsic component of membrane;GO:0016020//membrane	-	-
Unigene0000623	135.666666666667	122.333333333333	4.2404	3.6078	3.7527	2.1720	3.3717	2.9650	3.86696666666667	2.83623333333333	-0.447226102254629	0.28200465887121	0.973530539713457	no	-	--	-	-	-	-
Unigene0000624	13.3333333333333	25	0.9469	0.7041	1.5168	1.2868	1.1971	2.5159	1.05593333333333	1.6666	0.658389132621498	0.313683892290927	0.982253730736894	no	-	--	-	-	-	-
Unigene0000625	86.3333333333333	78	4.2819	2.2387	3.5401	2.8186	1.2936	3.1812	3.35356666666667	2.43113333333333	-0.46406726329644	0.353974174545077	0.992315520648901	no	-	--	-	-	-	-
Unigene0000626	718.333333333333	873.333333333333	6.0595	6.3169	6.9206	5.8939	7.5927	5.8040	6.43233333333333	6.4302	-0.000478560384493351	0.999911217752078	1	no	ATF7	PREDICTED: cyclic AMP-dependent transcription factor ATF-7-like isoform X2 [Sinocyclocheilus grahami]	-	-	GO:0097159//organic cyclic compound binding;GO:1901363//heterocyclic compound binding;GO:0003676//nucleic acid binding;GO:0005488//binding;GO:0001071//nucleic acid binding transcription factor activity;GO:0003677//DNA binding	GO:0097659//nucleic acid-templated transcription;GO:0006139//nucleobase-containing compound metabolic process;GO:0008152//metabolic process;GO:0016070//RNA metabolic process;GO:0009058//biosynthetic process;GO:0009987//cellular process;GO:0034645//cellular macromolecule biosynthetic process;GO:1901360//organic cyclic compound metabolic process;GO:0044238//primary metabolic process;GO:0019438//aro…
Unigene0000627	273.666666666667	280.666666666667	3.5610	4.3402	4.0484	3.6865	3.7224	2.5956	3.9832	3.33483333333333	-0.256313259611061	0.494539783783746	1	no	plekha8	PREDICTED: pleckstrin homology domain-containing family A member 8 isoform X1 [Sinocyclocheilus rhinocerous]	-	GO:0043231//intracellular membrane-bounded organelle;GO:0043226//organelle;GO:0005623//cell;GO:0044424//intracellular part;GO:0043227//membrane-bounded organelle;GO:0044464//cell part;GO:0005622//intracellular;GO:0043229//intracellular organelle	GO:0005319//lipid transporter activity;GO:0005215//transporter activity;GO:0022892//substrate-specific transporter activity;GO:0008289//lipid binding;GO:0005488//binding	GO:0051234//establishment of localization;GO:0008104//protein localization;GO:0051179//localization;GO:0033036//macromolecule localization;GO:0045184//establishment of protein localization
Unigene0000628	51.3333333333333	46	2.5106	2.7484	2.2750	1.5922	0.6224	3.1599	2.51133333333333	1.7915	-0.487285489015498	0.410151963580415	1	no	-	--	-	-	-	-
Unigene0000629	19.6666666666667	20	1.5728	2.7149	1.5542	2.5190	1.0025	1.1783	1.9473	1.5666	-0.313838298525087	0.628055440341704	1	no	-	--	-	-	-	-
Unigene0000630	62.3333333333333	50	2.3777	1.6370	0.9832	1.2566	0.2838	1.5188	1.66596666666667	1.01973333333333	-0.708167607257555	0.249849682969736	0.956918648216012	no	Myt1l	PREDICTED: myelin transcription factor 1-like protein [Sinocyclocheilus anshuiensis]	-	-	-	-
Unigene0000631	72.6666666666667	81.3333333333333	2.0748	1.9545	1.4087	1.9622	2.6689	0.2549	1.81266666666667	1.62866666666667	-0.154422287757503	0.817972055221324	1	no	-	PREDICTED: sterile alpha motif domain-containing protein 3-like [Danio rerio]	-	-	-	-
Unigene0000632	6.66666666666667	31	0.0000	0.0000	1.3634	3.4986	0.0000	2.4874	0.454466666666667	1.99533333333333	2.1343833906802	0.139235344027271	0.872888520783381	no	-	--	-	-	-	-
Unigene0000633	2764.66666666667	2294.66666666667	96.9663	68.0340	56.8953	46.4603	20.4598	77.0533	73.9652	47.9911333333333	-0.624078771192994	0.147622031116661	0.883094517112534	no	stpg1	PREDICTED: O(6)-methylguanine-induced apoptosis 2-like [Sinocyclocheilus anshuiensis]	-	-	-	-
Unigene0000634	36.6666666666667	47.3333333333333	1.5047	1.2937	0.9039	1.4313	1.0910	1.2362	1.2341	1.25283333333333	0.0217352012859708	0.981231486760552	1	no	-	--	-	-	-	-
Unigene0000635	63.6666666666667	47.6666666666667	3.2711	3.7881	2.1086	1.6397	2.1136	1.6873	3.05593333333333	1.81353333333333	-0.752809807868837	0.12305716791487	0.856502883426191	no	-	--	-	-	-	-
Unigene0000636	20	13.6666666666667	1.8026	0.4296	0.3702	0.5025	0.2062	0.6141	0.867466666666667	0.440933333333333	-0.976247776850019	0.200343218386259	0.927599203326793	no	-	reverse transcriptase [Danio rerio]	-	-	-	-
Unigene0000637	418	452.666666666667	12.2622	10.2222	9.9138	7.8724	9.1627	11.2059	10.7994	9.41366666666667	-0.198122486519466	0.576380566723368	1	no	X-element\ORF2	reverse transcriptase [Danio rerio]	-	-	-	-
Unigene0000638	2102	699	20.7345	9.0894	6.3637	2.7534	2.7775	3.6822	12.0625333333333	3.07103333333333	-1.97373685241531	6.14361534960498e-06	0.00428511263312496	yes	prmt8b	PREDICTED: ras and EF-hand domain-containing protein homolog [Sinocyclocheilus anshuiensis]	-	GO:0044464//cell part;GO:0016020//membrane;GO:0005622//intracellular;GO:0044424//intracellular part;GO:0005623//cell	GO:0016741//transferase activity, transferring one-carbon groups;GO:0003824//catalytic activity;GO:0016273//arginine N-methyltransferase activity;GO:0016274//protein-arginine N-methyltransferase activity;GO:0008168//methyltransferase activity;GO:0016740//transferase activity;GO:0008276//protein methyltransferase activity;GO:0008757//S-adenosylmethionine-dependent methyltransferase activity;GO:000…	GO:0036211//protein modification process;GO:0044699//single-organism process;GO:0035247//peptidyl-arginine omega-N-methylation;GO:0030182//neuron differentiation;GO:0044237//cellular metabolic process;GO:0048699//generation of neurons;GO:0022008//neurogenesis;GO:0019538//protein metabolic process;GO:0048731//system development;GO:0043414//macromolecule methylation;GO:0032501//multicellular organi…
Unigene0000639	1055	1655	10.4927	15.2244	4.8340	16.8922	10.8030	9.2172	10.1837	12.3041333333333	0.272881217360158	0.520987525368789	1	no	-	PREDICTED: uncharacterized protein LOC103912045 isoform X1 [Danio rerio]	-	-	-	-
Unigene0000640	8.33333333333333	9.33333333333333	1.1771	0.5050	0.3956	0.8614	0.5387	0.3799	0.692566666666667	0.593333333333333	-0.223110116728284	0.824595974932695	1	no	-	--	-	-	-	-
Unigene0000641	8	6.33333333333333	1.1952	0.2020	0.8703	0.4430	0.0808	0.9117	0.755833333333333	0.4785	-0.659549220208703	0.547386510889665	1	no	-	--	-	-	-	-
Unigene0000642	134.666666666667	103.666666666667	3.4634	2.0723	2.2224	1.6179	0.8693	2.2249	2.58603333333333	1.5707	-0.719333215662849	0.130823750510868	0.862669657985193	no	-	hypothetical protein cypCar_00008992 [Cyprinus carpio]	-	-	-	-
Unigene0000643	114.333333333333	89	3.3961	3.5035	4.1034	2.3076	1.9705	2.7400	3.66766666666667	2.33936666666667	-0.648744522615236	0.124161904642558	0.856653486857905	no	-	--	-	-	-	-
Unigene0000644	128.333333333333	106.333333333333	14.9921	15.8905	13.5021	9.4719	8.4107	11.6782	14.7949	9.8536	-0.586377132509776	0.156297283307135	0.893794458632738	no	-	--	-	-	-	-
Unigene0000645	18.6666666666667	27.3333333333333	1.5145	1.4077	1.4271	1.9370	1.3250	1.8688	1.44976666666667	1.71026666666667	0.238400565517186	0.685790258319114	1	no	-	--	-	-	-	-
Unigene0000646	18	22.6666666666667	0.9362	1.2182	0.8180	0.7633	0.8818	1.3528	0.9908	0.9993	0.0123239861491443	1	1	no	-	--	-	-	-	-
Unigene0000647	28.3333333333333	23.3333333333333	0.3452	0.3949	1.0828	0.1804	0.4937	0.6499	0.607633333333333	0.441333333333333	-0.461332298551083	0.480427889390509	1	no	-	PREDICTED: microfibril-associated glycoprotein 4-like, partial [Sinocyclocheilus rhinocerous]	-	-	-	-
Unigene0000648	76	106.666666666667	3.5396	2.0962	0.9808	2.4689	1.7238	2.8473	2.20553333333333	2.34666666666667	0.0894853633715526	0.871804639181608	1	no	-	--	-	-	-	-
Unigene0000649	125	100.666666666667	11.5528	7.4461	8.7807	7.4488	6.2711	4.2453	9.25986666666667	5.9884	-0.628820829597377	0.152083237561091	0.887602695157117	no	-	--	-	-	-	-
Unigene0000650	82.3333333333333	61.3333333333333	5.5803	3.4402	3.4829	0.8125	1.3974	5.1760	4.1678	2.46196666666667	-0.759474819888988	0.234074480955463	0.947941534950217	no	-	--	-	-	-	-
Unigene0000651	20	29	1.3406	0.8473	0.7029	0.9838	0.6381	1.6498	0.9636	1.09056666666667	0.178571666364921	0.758671943806467	1	no	-	--	-	-	-	-
Unigene0000652	146.666666666667	157.333333333333	2.6571	1.5055	2.7166	2.1640	2.1790	1.7306	2.29306666666667	2.02453333333333	-0.179688902464437	0.670272535229032	1	no	BTN3A2	PREDICTED: butyrophilin subfamily 1 member A1-like [Sinocyclocheilus grahami]	ko04514//Cell adhesion molecules (CAMs)//Signaling molecules and interaction//Environmental Information Processing	-	-	-
Unigene0000653	1390.33333333333	1448	11.9189	9.9578	9.4882	10.4690	7.8590	7.8079	10.4549666666667	8.71196666666667	-0.263118123019499	0.418206955312037	1	no	Tmem65	PREDICTED: transmembrane protein 65 isoform X2 [Sinocyclocheilus anshuiensis]	-	-	-	-
Unigene0000654	52	59.6666666666667	0.6666	0.4607	1.0952	0.3600	0.8516	0.9680	0.740833333333333	0.726533333333333	-0.0281200230279675	0.974203702085908	1	no	TY3B-I	PREDICTED: protein turtle homolog B-like [Sinocyclocheilus anshuiensis]	-	-	-	-
Unigene0000655	320.333333333333	103	7.5339	4.0034	1.7352	1.1666	1.8162	0.2898	4.42416666666667	1.09086666666667	-2.01993095944209	0.00158163947896534	0.169469048987691	no	-	PREDICTED: SLAM family member 5-like [Sinocyclocheilus anshuiensis]	-	-	-	-
Unigene0000656	5.66666666666667	5.66666666666667	0.5389	0.0835	0.6540	0.0610	0.1336	0.8792	0.425466666666667	0.357933333333333	-0.249355203718777	0.868074285670108	1	no	-	--	-	-	-	-
Unigene0000657	165.666666666667	131.333333333333	4.1989	3.1956	4.6375	2.0297	3.3112	2.5616	4.01066666666667	2.63416666666667	-0.606495436885776	0.147713477186035	0.883094517112534	no	-	--	-	-	-	-
Unigene0000658	1334.33333333333	2405.66666666667	12.2697	2.9103	16.2753	15.8986	18.3121	14.0130	10.4851	16.0745666666667	0.616439225360205	0.199796480184961	0.927020396324476	no	set-1	PREDICTED: uncharacterized protein LOC103911548 [Danio rerio]	-	-	-	-
Unigene0000659	1694.66666666667	934.333333333333	42.4712	24.4431	29.3326	13.7878	8.2948	20.0528	32.0823	14.0451333333333	-1.19170725287391	0.00256458745095903	0.215982946379335	no	-	PREDICTED: probable GPI-anchored adhesin-like protein PGA55 isoform X1 [Stegastes partitus]	-	-	-	-
Unigene0000660	56.3333333333333	63.6666666666667	1.5038	1.2095	1.5161	1.1986	1.8280	0.9099	1.4098	1.31216666666667	-0.103539533011422	0.83964421855815	1	no	-	--	-	-	-	-
Unigene0000661	63.6666666666667	28.6666666666667	3.0128	2.0393	0.7631	0.4450	0.2922	1.2365	1.9384	0.6579	-1.5589260920566	0.0185572530328637	0.515483900661253	no	-	--	-	-	-	-
Unigene0000662	457.666666666667	588.666666666667	3.7519	4.0415	4.3787	4.8263	4.2655	3.7159	4.05736666666667	4.26923333333333	0.0734333290377826	0.8318222058468	1	no	Gtpbp2	PREDICTED: GTP-binding protein 2-like [Sinocyclocheilus rhinocerous]	-	-	GO:0032550//purine ribonucleoside binding;GO:0036094//small molecule binding;GO:0032549//ribonucleoside binding;GO:0005488//binding;GO:0097367//carbohydrate derivative binding;GO:0001883//purine nucleoside binding;GO:0097159//organic cyclic compound binding;GO:1901363//heterocyclic compound binding;GO:0001882//nucleoside binding	-
Unigene0000663	1334	1166.33333333333	10.8061	8.3285	11.5886	6.0400	8.7389	7.3813	10.2410666666667	7.38673333333333	-0.471357586924213	0.159309511712041	0.897023609180675	no	pol	PREDICTED: myosin-IIIa-like [Sinocyclocheilus rhinocerous]	-	-	-	-
Unigene0000664	139.666666666667	135.333333333333	10.2947	7.3403	8.2663	5.3181	9.2289	5.8671	8.63376666666667	6.8047	-0.343458544742877	0.422006157763727	1	no	-	PREDICTED: receptor-type tyrosine-protein phosphatase mu-like [Sinocyclocheilus grahami]	-	-	-	-
Unigene0000665	0.666666666666667	1	0.1578	0.0000	0.1149	0.2145	0.0000	0.1103	0.0909	0.108266666666667	0.252236932269918	1	1	no	-	PREDICTED: receptor-type tyrosine-protein phosphatase mu-like [Sinocyclocheilus grahami]	-	-	-	-
Unigene0000666	19	15	1.7939	1.1409	1.7188	0.8982	0.8426	1.2544	1.5512	0.9984	-0.635694869244544	0.292752901909761	0.977571901179225	no	-	--	-	-	-	-
Unigene0000667	7	17	0.1744	0.0000	1.2066	0.9481	1.6214	0.6098	0.460333333333333	1.05976666666667	1.20299583657532	0.218141633934412	0.938863596785224	no	-	--	-	-	-	-
Unigene0000668	517.333333333333	530.666666666667	10.5910	8.3646	8.7967	6.8775	8.3466	7.7908	9.25076666666667	7.67163333333333	-0.270039167182581	0.429285684339358	1	no	RLN3	PREDICTED: relaxin-3-like [Sinocyclocheilus grahami]	-	-	-	-
Unigene0000669	198.666666666667	185.666666666667	9.0551	9.6761	12.5591	5.6923	9.3908	9.3035	10.4301	8.12886666666667	-0.359626860264551	0.377120366792822	1	no	-	--	-	-	-	-
Unigene0000670	2916.66666666667	2969.33333333333	12.1975	9.3694	10.8661	10.1888	7.5532	8.8944	10.811	8.8788	-0.284063366476086	0.357806466809929	0.994162578408029	no	RNF212B	PREDICTED: homeobox and leucine zipper protein Homez-like [Sinocyclocheilus anshuiensis]	-	-	-	-
Unigene0000671	19.6666666666667	18	0.2280	0.8478	0.8025	0.4390	0.5935	0.4252	0.6261	0.4859	-0.365733668763706	0.58916513945933	1	no	-	--	-	-	-	-
Unigene0000672	35.6666666666667	26.3333333333333	0.4206	1.3551	0.8166	0.3620	0.6464	0.5685	0.8641	0.525633333333333	-0.717141513440714	0.2222922331241	0.94154246751075	no	-	--	-	-	-	-
Unigene0000673	35	54	1.9403	2.2363	2.7692	3.6388	3.1167	2.1165	2.31526666666667	2.95733333333333	0.35311849568982	0.494375890345897	1	no	-	--	-	-	-	-
Unigene0000674	265.666666666667	95	4.7253	8.2376	2.2939	0.7278	2.8893	0.7196	5.0856	1.44556666666667	-1.81478284896167	0.00331728488623135	0.240632528362336	no	-	Mucin-12, partial [Columba livia]	-	-	-	-
Unigene0000675	3144	3145.66666666667	35.1084	30.7814	30.7764	28.7029	20.0891	28.8735	32.2220666666667	25.8885	-0.315737652156668	0.310021538163404	0.981670718999375	no	MAD1L1	mitotic spindle assembly checkpoint protein MAD1 [Danio rerio]	ko04110//Cell cycle//Cell growth and death//Cellular Processes;ko04914//Progesterone-mediated oocyte maturation//Endocrine system//Organismal Systems	-	-	-
Unigene0000676	36	43.3333333333333	1.4895	2.5381	1.8076	1.9398	2.4461	1.3452	1.94506666666667	1.91036666666667	-0.0259700352219294	0.980779668702024	1	no	-	--	-	-	-	-
Unigene0000677	6.33333333333333	12.6666666666667	1.0111	0.0000	0.8180	0.7633	1.0025	1.2568	0.6097	1.00753333333333	0.72465611870248	0.439289731012122	1	no	-	--	-	-	-	-
Unigene0000678	516	585	9.2134	7.3379	7.1005	5.7651	5.8323	9.8756	7.88393333333333	7.15766666666667	-0.139426218130521	0.706943406806171	1	no	-	--	-	-	-	-
Unigene0000679	325	302.333333333333	8.7963	8.1760	7.0783	4.6255	5.2290	8.0898	8.01686666666667	5.98143333333333	-0.422547240645816	0.271719982873402	0.967411621777997	no	-	TPA_exp: polyprotein [Danio rerio]	-	-	-	-
Unigene0000680	2015.66666666667	2951.66666666667	62.9402	51.3693	59.5580	79.3530	68.5984	58.6251	57.9558333333333	68.8588333333333	0.248687859956738	0.42084945416744	1	no	PQBP1	PREDICTED: polyglutamine-binding protein 1-like [Sinocyclocheilus anshuiensis]	ko03040//Spliceosome//Transcription//Genetic Information Processing	-	-	-
Unigene0000681	12977	10099.6666666667	230.0041	167.9564	153.2586	137.6353	57.7745	142.0808	183.7397	112.496866666667	-0.707778559091875	0.0588514263769376	0.745560981003108	no	tacc3	PREDICTED: transforming acidic coiled-coil-containing protein 3-like isoform X1 [Sinocyclocheilus rhinocerous]	ko03013//RNA transport//Translation//Genetic Information Processing	-	-	-
Unigene0000682	35.3333333333333	15	7.3645	2.9947	4.1336	1.7723	0.4564	2.5747	4.83093333333333	1.60113333333333	-1.59320849143485	0.0187213719116788	0.516557473222239	no	-	--	-	-	-	-
Unigene0000683	9381.66666666667	13423.6666666667	404.5317	426.8144	493.6779	521.5660	561.1377	478.1197	441.674666666667	520.274466666667	0.236288820957212	0.422758218263268	1	no	rps27	40S ribosomal protein S27, partial [Scophthalmus maximus]	ko03010//Ribosome//Translation//Genetic Information Processing	GO:0044464//cell part;GO:0030529//intracellular ribonucleoprotein complex;GO:0005623//cell;GO:0005622//intracellular;GO:0044424//intracellular part;GO:0032991//macromolecular complex;GO:1990904//ribonucleoprotein complex	GO:0043167//ion binding;GO:0005198//structural molecule activity;GO:0043169//cation binding;GO:0005488//binding	GO:0071704//organic substance metabolic process;GO:0008152//metabolic process;GO:0010467//gene expression;GO:0043170//macromolecule metabolic process
Unigene0000684	423.333333333333	224.333333333333	75.2818	46.9019	34.5586	17.9775	25.2538	21.9328	52.2474333333333	21.7213666666667	-1.26624528862401	0.00197006175447982	0.188779801331852	no	LIAT1	Zgc:64189 [Danio rerio]	-	-	-	-
Unigene0000685	102	98	2.1532	0.8126	1.4029	0.5280	0.9993	1.8452	1.45623333333333	1.12416666666667	-0.37338559568881	0.497867975312992	1	no	-	--	-	-	-	-
Unigene0000686	67.3333333333333	63	2.3121	1.4685	2.8340	0.8117	2.2353	2.1556	2.20486666666667	1.7342	-0.346421125573522	0.513765924579799	1	no	-	--	-	-	-	-
Unigene0000687	1335	1459.66666666667	10.8002	11.3603	11.2576	10.7400	10.0325	8.9358	11.1393666666667	9.90276666666667	-0.169763658600817	0.589231908873394	1	no	CLINT1	PREDICTED: clathrin interactor 1-like isoform X1 [Cyprinus carpio]	ko04144//Endocytosis//Transport and catabolism//Cellular Processes	-	-	-
Unigene0000688	5.33333333333333	5	0.2338	0.3260	0.2554	0.1589	0.1304	0.3269	0.271733333333333	0.2054	-0.403755369126461	0.633912139743041	1	no	-	unnamed protein product [Oncorhynchus mykiss]	-	-	-	-
Unigene0000689	40.3333333333333	40.6666666666667	1.7051	1.2598	1.6236	1.0695	1.0079	1.6814	1.5295	1.25293333333333	-0.287750453791122	0.57802953585038	1	no	-	PREDICTED: uncharacterized protein LOC107727458 [Sinocyclocheilus rhinocerous]	-	-	-	-
Unigene0000690	0.333333333333333	2	0.0000	0.1120	0.0000	0.0000	0.4481	0.0843	0.0373333333333333	0.177466666666667	2.24901183896693	0.271644436076526	0.967411621777997	no	-	--	-	-	-	-
Unigene0000691	3.33333333333333	1.33333333333333	0.0714	0.5311	0.0520	0.1456	0.0531	0.0000	0.218166666666667	0.0662333333333333	-1.71980131958294	0.240070153883209	0.951171050160727	no	-	--	-	-	-	-
Unigene0000692	74	79	3.0742	1.7898	1.8203	1.9282	1.8339	1.8897	2.2281	1.88393333333333	-0.24206607087657	0.598958166565107	1	no	-	PREDICTED: HIRA-interacting protein 3-like isoform X3 [Sinocyclocheilus grahami]	-	-	-	-
Unigene0000693	22	10	1.0781	0.8278	0.8192	0.4459	0.2789	0.2622	0.908366666666667	0.329	-1.46518718206113	0.0146689460049138	0.47104400565876	no	-	PREDICTED: putative nuclease HARBI1 [Cyprinus carpio]	-	-	-	-
Unigene0000694	24.6666666666667	16.6666666666667	1.6861	1.3510	0.8467	0.8691	0.9945	0.2033	1.2946	0.688966666666667	-0.910000319199421	0.174708346530425	0.91073466998177	no	-	--	-	-	-	-
Unigene0000695	3371.66666666667	4324	22.9043	38.8466	24.8285	25.6640	41.0972	23.5413	28.8598	30.1008333333333	0.0607421262474155	0.862299528516979	1	no	CANX	calnexin 2 [Cyprinus carpio]	ko04141//Protein processing in endoplasmic reticulum//Folding, sorting and degradation//Genetic Information Processing;ko04145//Phagosome//Transport and catabolism//Cellular Processes	GO:0005622//intracellular;GO:0043231//intracellular membrane-bounded organelle;GO:0043229//intracellular organelle;GO:0044424//intracellular part;GO:0043227//membrane-bounded organelle;GO:0044464//cell part;GO:0043226//organelle;GO:0005623//cell	GO:0003824//catalytic activity;GO:0004197//cysteine-type endopeptidase activity;GO:0016787//hydrolase activity;GO:0008234//cysteine-type peptidase activity;GO:0005488//binding;GO:0070011//peptidase activity, acting on L-amino acid peptides;GO:0008233//peptidase activity;GO:0004175//endopeptidase activity;GO:0005515//protein binding	GO:0044238//primary metabolic process;GO:0008152//metabolic process;GO:0044237//cellular metabolic process;GO:0044260//cellular macromolecule metabolic process;GO:0043170//macromolecule metabolic process;GO:0051604//protein maturation;GO:0019538//protein metabolic process;GO:0016485//protein processing;GO:0071704//organic substance metabolic process;GO:0010467//gene expression;GO:0006508//proteol…
Unigene0000696	71.6666666666667	166.333333333333	0.5531	1.7279	0.6489	0.7412	2.9821	1.7941	0.976633333333333	1.83913333333333	0.913137151577331	0.120898777979611	0.854663605032819	no	SLC25A29	PREDICTED: mitochondrial basic amino acids transporter-like isoform X1 [Cyprinus carpio]	-	-	-	-
Unigene0000697	1.33333333333333	15	0.0434	0.1211	0.0000	0.2656	0.5814	0.5467	0.0548333333333333	0.464566666666667	3.0827605591555	0.0011378651677359	0.142555442836605	no	-	vacuolar protein sorting 52 [Salmo salar]	-	-	-	-
Unigene0000698	274.333333333333	371	2.8531	2.9097	3.5586	2.5220	4.7051	3.2602	3.10713333333333	3.49576666666667	0.170024740179679	0.662092622968442	1	no	-	--	-	-	-	-
Unigene0000699	21	18.3333333333333	2.7141	0.6639	0.7801	1.2618	0.5311	0.9489	1.38603333333333	0.913933333333333	-0.600801116747807	0.416959173356859	1	no	-	--	-	-	-	-
Unigene0000700	301	328	8.4620	7.6936	8.0438	7.5479	5.9725	7.7887	8.06646666666667	7.10303333333333	-0.183501616263581	0.613315567955936	1	no	STK19	PREDICTED: serine/threonine-protein kinase 19 isoform X2 [Sinocyclocheilus grahami]	-	-	-	-
Unigene0000701	6	8.66666666666667	0.8620	0.3561	0.3487	0.1952	0.2849	1.2725	0.522266666666667	0.5842	0.161675730599588	0.940196304107483	1	no	-	--	-	-	-	-
Unigene0000702	103.666666666667	108.666666666667	1.5920	1.3137	1.4905	0.7396	1.7638	1.2836	1.4654	1.26233333333333	-0.215201600288816	0.646967067723138	1	no	pol	PREDICTED: uncharacterized protein LOC108184914 [Danio rerio]	-	-	-	-
Unigene0000703	21	26	0.6489	0.9047	0.9450	0.5039	1.5511	0.5510	0.832866666666667	0.868666666666667	0.0607171245406545	0.972881096462197	1	no	PEG10	Retrotransposable element Tf2 protein type 1 [Larimichthys crocea]	ko03410//Base excision repair//Replication and repair//Genetic Information Processing	-	-	-
Unigene0000704	5.33333333333333	8	0.3809	0.7081	0.2774	0.5177	0.7790	0.3329	0.455466666666667	0.5432	0.254138005345397	0.774562469083114	1	no	-	--	-	-	-	-
Unigene0000705	617.666666666667	353.666666666667	13.2079	7.3402	7.8973	4.2646	0.7565	7.6920	9.4818	4.2377	-1.16187950411552	0.0526976169602822	0.721247981133947	no	efhc2	PREDICTED: EF-hand domain-containing family member C2-like isoform X1 [Sinocyclocheilus rhinocerous]	-	-	GO:0046872//metal ion binding;GO:0005488//binding;GO:0043169//cation binding;GO:0043167//ion binding	-
Unigene0000706	161.333333333333	190	1.8993	2.2740	2.5081	1.8592	2.1785	2.4534	2.22713333333333	2.1637	-0.0416874501677712	0.921090935243086	1	no	-	--	-	-	-	-
Unigene0000707	33.3333333333333	29	0.8894	1.0423	1.3516	1.1299	0.7189	0.5137	1.09443333333333	0.7875	-0.474832247789633	0.377994145816456	1	no	-	--	-	-	-	-
Unigene0000708	18.3333333333333	25.6666666666667	1.5933	1.8758	1.6242	2.0209	2.2118	1.5597	1.69776666666667	1.9308	0.185560536828806	0.769756921186717	1	no	-	--	-	-	-	-
Unigene0000709	57.6666666666667	63.6666666666667	1.8102	0.9060	2.3574	1.2773	1.9934	1.4605	1.6912	1.57706666666667	-0.100803633983512	0.847904640343255	1	no	-	--	-	-	-	-
Unigene0000710	43.3333333333333	30.3333333333333	1.2250	0.8924	1.5429	0.8548	0.6155	0.6482	1.2201	0.706166666666667	-0.788918768653192	0.124584363523461	0.856933922399806	no	-	PREDICTED: protein MAATS1 isoform X1 [Danio rerio]	-	-	GO:0097159//organic cyclic compound binding;GO:0005488//binding	GO:1901360//organic cyclic compound metabolic process;GO:0008152//metabolic process;GO:0006259//DNA metabolic process;GO:0044260//cellular macromolecule metabolic process;GO:0034641//cellular nitrogen compound metabolic process;GO:0071704//organic substance metabolic process;GO:0043170//macromolecule metabolic process;GO:0009987//cellular process;GO:0006725//cellular aromatic compound metabolic p…
Unigene0000711	18	11	3.5792	1.6018	1.3514	0.7206	0.7886	1.5757	2.17746666666667	1.0283	-1.08238941070677	0.110663339967008	0.836532973762981	no	-	--	-	-	-	-
Unigene0000712	2708.33333333333	3788.66666666667	52.9795	63.6086	59.7906	71.7076	56.8163	71.8645	58.7929	66.7961333333333	0.184122649417701	0.545004966073732	1	no	sap30l	PREDICTED: histone deacetylase complex subunit SAP30L [Cyprinus carpio]	-	GO:0043226//organelle;GO:0043231//intracellular membrane-bounded organelle;GO:0044424//intracellular part;GO:0005623//cell;GO:0043227//membrane-bounded organelle;GO:0043229//intracellular organelle;GO:0044464//cell part;GO:0005622//intracellular	GO:0043169//cation binding;GO:0005488//binding;GO:0043167//ion binding	GO:0018130//heterocycle biosynthetic process;GO:0044260//cellular macromolecule metabolic process;GO:0006807//nitrogen compound metabolic process;GO:0044237//cellular metabolic process;GO:1901576//organic substance biosynthetic process;GO:0016070//RNA metabolic process;GO:0044271//cellular nitrogen compound biosynthetic process;GO:0044238//primary metabolic process;GO:0046483//heterocycle metabol…
Unigene0000713	13	14	0.9206	2.0322	1.0055	1.0164	1.7115	0.7241	1.31943333333333	1.15066666666667	-0.197448494030891	0.785167425599469	1	no	-	PREDICTED: zinc finger BED domain-containing protein 5-like [Larimichthys crocea]	-	-	-	-
Unigene0000714	40.3333333333333	40.6666666666667	1.5014	1.1232	1.2532	0.9206	0.2996	1.8948	1.2926	1.03833333333333	-0.316006234200373	0.625953120564619	1	no	-	--	-	-	-	-
Unigene0000715	116	93.3333333333333	2.2503	1.7683	2.1599	0.9591	2.0690	1.0728	2.0595	1.36696666666667	-0.591316062794764	0.198732733663962	0.925828471885579	no	-	--	-	-	-	-
Unigene0000716	24.3333333333333	28.6666666666667	0.3959	0.9462	1.9766	0.5764	1.9767	0.9490	1.10623333333333	1.16736666666667	0.0776020592663157	0.933767909046931	1	no	-	--	-	-	-	-
Unigene0000717	43.3333333333333	51	0.9703	1.4222	1.7120	1.1158	1.5265	1.4091	1.36816666666667	1.35046666666667	-0.0187859559611793	0.982949443631518	1	no	-	PREDICTED: muscle M-line assembly protein unc-89-like [Sinocyclocheilus rhinocerous]	-	-	-	-
Unigene0000718	68.6666666666667	46	1.1204	1.0877	2.0669	0.7275	1.2406	0.4875	1.425	0.818533333333333	-0.799848845045648	0.134384165441905	0.866154765005128	no	-	--	-	-	-	-
Unigene0000719	498.333333333333	528	4.5764	3.8235	3.0016	2.3118	3.4862	3.8351	3.8005	3.21103333333333	-0.243151592786213	0.510266567002295	1	no	-	PREDICTED: uncharacterized protein LOC107591874 [Sinocyclocheilus grahami]	-	-	-	-
Unigene0000720	415.333333333333	330.333333333333	16.0499	13.9135	13.7270	8.4035	6.6078	12.8736	14.5634666666667	9.29496666666667	-0.64783221695307	0.0902013799600527	0.810210197000949	no	-	--	-	-	-	-
Unigene0000721	146.666666666667	154.666666666667	1.8859	2.7399	2.3465	1.5800	2.5190	1.9460	2.3241	2.015	-0.205892306753516	0.625058093475554	1	no	PEG10	Retrotransposable element Tf2 protein type 1 [Larimichthys crocea]	-	-	-	-
Unigene0000722	35.6666666666667	27	1.6143	3.9718	3.1115	1.6131	1.9067	1.9255	2.8992	1.8151	-0.675605827135336	0.225143859946221	0.942767067823187	no	-	--	-	-	-	-
Unigene0000723	286.666666666667	229.666666666667	20.0005	13.0778	11.6000	7.7826	10.8093	9.8382	14.8927666666667	9.4767	-0.652155119061855	0.0989328800119613	0.820931555832196	no	-	--	-	-	-	-
Unigene0000724	25.6666666666667	23	1.0424	1.3726	0.6009	0.5607	0.8398	0.7289	1.0053	0.7098	-0.502141612864683	0.38129182792355	1	no	-	--	-	-	-	-
Unigene0000725	110.666666666667	94	7.7884	6.2049	8.6804	5.2920	5.8510	4.7234	7.5579	5.2888	-0.515045010355005	0.223433037202633	0.942288207013719	no	-	--	-	-	-	-
Unigene0000726	22.3333333333333	28.3333333333333	0.6156	0.8901	0.5230	0.8598	0.6613	0.5261	0.676233333333333	0.6824	0.0130965144097714	1	1	no	-	PREDICTED: mucin-19-like [Sinocyclocheilus anshuiensis]	-	-	-	-
Unigene0000727	38.3333333333333	51.3333333333333	1.3183	1.1398	0.7143	0.6458	1.3679	1.3505	1.05746666666667	1.1214	0.084688787309346	0.885890658487982	1	no	KCNH7	PREDICTED: potassium voltage-gated channel subfamily H member 2-like [Sinocyclocheilus rhinocerous]	-	-	-	-
Unigene0000728	16.6666666666667	13.6666666666667	1.7817	1.2421	0.9730	1.1501	0.3975	0.9967	1.33226666666667	0.8481	-0.651576592334473	0.315874027460997	0.982863856377796	no	-	--	-	-	-	-
Unigene0000729	46.6666666666667	39.3333333333333	0.3104	1.5870	2.4866	1.7666	0.2886	1.1125	1.46133333333333	1.0559	-0.468812088198587	0.534130608591532	1	no	-	--	-	-	-	-
Unigene0000730	1697	1727	6.6532	9.5151	8.8901	6.0509	7.4471	7.4777	8.3528	6.9919	-0.256575343289477	0.425243156098696	1	no	Map4	PREDICTED: microtubule-associated protein 4-like isoform X3 [Sinocyclocheilus grahami]	-	-	-	-
Unigene0000731	247.666666666667	416.666666666667	4.9632	7.4229	2.7762	6.7141	7.1302	6.1047	5.0541	6.64966666666667	0.395827813651917	0.342360791454429	0.988364039424551	no	ICOSLG	PREDICTED: CD276 antigen homolog [Sinocyclocheilus anshuiensis]	-	-	-	-
Unigene0000732	34.6666666666667	45.3333333333333	2.6726	3.1466	2.3353	1.9976	3.5775	3.0523	2.71816666666667	2.8758	0.0813294269180127	0.883726071889116	1	no	-	PREDICTED: CXADR-like membrane protein [Cyprinus carpio]	-	-	-	-
Unigene0000733	12	33	0.4267	1.3220	0.5178	0.7732	2.8030	1.4918	0.7555	1.68933333333333	1.16095036325482	0.093745401515657	0.815645192443189	no	-	--	-	-	-	-
Unigene0000734	14.3333333333333	5.33333333333333	1.8360	0.6826	1.0027	0.0000	0.9558	0.1284	1.17376666666667	0.3614	-1.69947723197105	0.0874128845493129	0.805002420363763	no	-	--	-	-	-	-
Unigene0000735	3.33333333333333	2	0.0785	0.3650	0.2287	0.0000	0.0000	0.3295	0.224066666666667	0.109833333333333	-1.02861207741259	0.474576002735916	1	no	-	PREDICTED: zinc finger protein 2-like isoform X1 [Sinocyclocheilus anshuiensis]	-	-	-	-
Unigene0000736	35.6666666666667	60.3333333333333	2.3121	2.8654	2.0764	6.0747	1.3182	2.2634	2.41796666666667	3.21876666666667	0.412713641248616	0.504966905686825	1	no	-	--	-	-	-	-
Unigene0000737	7	0	0.2334	0.2712	0.0637	0.0000	0.0000	0.0000	0.189433333333333	0.001	-7.56554640444281	0.000286329050146033	0.0618155445492353	no	-	PREDICTED: E3 ubiquitin-protein ligase RNF213 isoform X3 [Salmo salar]	-	-	-	-
Unigene0000738	113	86.6666666666667	0.8521	1.2692	0.9195	0.4953	0.8169	0.5886	1.0136	0.6336	-0.6778441890612	0.12619916484368	0.858114099980847	no	Flt3	PREDICTED: receptor-type tyrosine-protein kinase FLT3-like [Sinocyclocheilus grahami]	ko04060//Cytokine-cytokine receptor interaction//Signaling molecules and interaction//Environmental Information Processing	-	-	-
Unigene0000739	1015.33333333333	957.333333333333	5.3031	7.0936	7.6278	4.8514	7.2930	3.5844	6.67483333333333	5.24293333333333	-0.348357612660963	0.344401909645548	0.989062420572266	no	CNNM2	PREDICTED: metal transporter CNNM2-like isoform X1 [Sinocyclocheilus grahami]	-	-	-	-
Unigene0000740	13.6666666666667	2.66666666666667	0.3348	0.3111	2.8438	0.0000	0.3319	0.3121	1.16323333333333	0.214666666666667	-2.43797042375161	0.0276716484352744	0.596869969029548	no	Slc26a4	PREDICTED: pendrin-like [Sinocyclocheilus rhinocerous]	-	GO:0044425//membrane part;GO:0016020//membrane;GO:0031224//intrinsic component of membrane	GO:0022857//transmembrane transporter activity;GO:0005215//transporter activity;GO:0015075//ion transmembrane transporter activity;GO:0022891//substrate-specific transmembrane transporter activity;GO:0022892//substrate-specific transporter activity;GO:0015103//inorganic anion transmembrane transporter activity;GO:0008509//anion transmembrane transporter activity	GO:0048878//chemical homeostasis;GO:0051179//localization;GO:0006811//ion transport;GO:0006820//anion transport;GO:0006950//response to stress;GO:0042592//homeostatic process;GO:0015698//inorganic anion transport;GO:0044763//single-organism cellular process;GO:0065007//biological regulation;GO:0006810//transport;GO:0044699//single-organism process;GO:0009987//cellular process;GO:0009628//response…
Unigene0000741	293.333333333333	358	4.0986	2.5018	4.8552	3.4915	5.1406	3.0583	3.81853333333333	3.8968	0.0292712707196303	0.946346354927918	1	no	STEAP3	PREDICTED: metalloreductase STEAP3-like [Sinocyclocheilus anshuiensis]	ko04115//p53 signaling pathway//Cell growth and death//Cellular Processes	-	-	-
Unigene0000742	54	43.6666666666667	0.6795	2.0892	4.0346	1.5273	1.6715	1.6447	2.26776666666667	1.6145	-0.490184766276945	0.410182933594186	1	no	-	--	-	-	-	-
Unigene0000743	26.3333333333333	30	0.7866	1.2185	1.4891	1.1045	1.2089	1.0266	1.16473333333333	1.11333333333333	-0.065114084476457	0.920511835532241	1	no	-	PREDICTED: mucin-5AC [Danio rerio]	-	-	-	-
Unigene0000744	30.6666666666667	35.3333333333333	0.6513	0.5821	0.7478	0.6978	0.6147	0.5605	0.6604	0.624333333333333	-0.0810236265040073	0.904293322490834	1	no	-	PREDICTED: mucin-17-like [Cyprinus carpio]	-	-	-	-
Unigene0000745	8	6.66666666666667	0.4603	0.6417	1.1731	0.3909	0.5990	0.6437	0.758366666666667	0.544533333333333	-0.477875187755917	0.577870916811852	1	no	-	--	-	-	-	-
Unigene0000746	0	0.666666666666667	0.0000	0.0000	0.0000	0.0000	0.1257	0.0000	0.001	0.0419	5.38887833881199	0.552003006813747	1	no	C7orf55	PREDICTED: UPF0562 protein C7orf55 homolog [Danio rerio]	-	-	-	-
Unigene0000747	9.66666666666667	8.33333333333333	0.2979	0.2769	1.1388	0.5060	0.4984	0.3124	0.5712	0.438933333333333	-0.379994144328631	0.61102378561401	1	no	-	--	-	-	-	-
Unigene0000748	3	6	0.1007	0.3745	0.2934	0.4107	0.5244	0.3522	0.2562	0.4291	0.744043425406739	0.497304470124373	1	no	-	--	-	-	-	-
Unigene0000749	22.6666666666667	28	0.6432	0.4720	0.8381	0.7360	0.5790	0.6864	0.6511	0.667133333333333	0.0350959888861949	0.970617332486615	1	no	-	PREDICTED: low density lipoprotein receptor adapter protein 1-like isoform X1 [Sinocyclocheilus grahami]	-	-	-	-
Unigene0000750	32	58	2.5733	1.8844	2.1009	3.6029	4.1752	1.8538	2.1862	3.21063333333333	0.554432524123679	0.289627970289331	0.976284323993273	no	Tuba1b	PREDICTED: tubulin alpha chain-like [Peromyscus maniculatus bairdii]	ko04145//Phagosome//Transport and catabolism//Cellular Processes;ko04540//Gap junction//Cellular commiunity//Cellular Processes	GO:0043227//membrane-bounded organelle;GO:0044464//cell part;GO:0031988//membrane-bounded vesicle;GO:0043226//organelle;GO:0043228//non-membrane-bounded organelle;GO:0044430//cytoskeletal part;GO:0044422//organelle part;GO:0043231//intracellular membrane-bounded organelle;GO:0005623//cell;GO:0031982//vesicle;GO:0099513//polymeric cytoskeletal fiber;GO:0043232//intracellular non-membrane-bounded o…	GO:0001883//purine nucleoside binding;GO:1901363//heterocyclic compound binding;GO:0016817//hydrolase activity, acting on acid anhydrides;GO:0032550//purine ribonucleoside binding;GO:0032549//ribonucleoside binding;GO:0005198//structural molecule activity;GO:0017111//nucleoside-triphosphatase activity;GO:0097367//carbohydrate derivative binding;GO:0016818//hydrolase activity, acting on acid anhyd…	GO:0070670//response to interleukin-4;GO:0009259//ribonucleotide metabolic process;GO:1901565//organonitrogen compound catabolic process;GO:0006725//cellular aromatic compound metabolic process;GO:0009154//purine ribonucleotide catabolic process;GO:1901361//organic cyclic compound catabolic process;GO:0006793//phosphorus metabolic process;GO:1901136//carbohydrate derivative catabolic process;GO:0…
Unigene0000751	5.66666666666667	3.66666666666667	0.9424	0.4380	0.9149	0.3202	0.7008	0.2196	0.7651	0.413533333333333	-0.887644698878912	0.332063938897824	0.988244612183311	no	-	--	-	-	-	-
Unigene0000752	43	53	6.7892	2.0322	4.2733	4.2222	3.6797	4.9885	4.3649	4.2968	-0.0226859754372481	0.984990218162824	1	no	-	--	-	-	-	-
Unigene0000753	21	16.3333333333333	2.4249	0.6574	2.3543	0.9611	0.6762	1.8368	1.8122	1.15803333333333	-0.646065403375952	0.366425968513333	0.996469447253902	no	-	--	-	-	-	-
Unigene0000754	0.333333333333333	0	0.1387	0.0000	0.0000	0.0000	0.0000	0.0000	0.0462333333333333	0.001	-5.53086147671508	1	1	no	-	--	-	-	-	-
Unigene0000755	22.3333333333333	27.6666666666667	1.2768	1.3415	0.7276	1.2824	1.0733	0.8927	1.1153	1.0828	-0.042665034338674	0.971452076405145	1	no	-	--	-	-	-	-
Unigene0000756	22	28.3333333333333	1.6325	1.8967	1.2482	1.4975	2.0639	1.3698	1.59246666666667	1.64373333333333	0.0457130917770397	0.942267124831482	1	no	-	--	-	-	-	-
Unigene0000757	5	8.33333333333333	0.2410	1.0081	0.3510	0.6551	0.8066	0.6741	0.533366666666667	0.711933333333333	0.416614486160549	0.638635892377753	1	no	-	--	-	-	-	-
Unigene0000758	34.3333333333333	35.3333333333333	1.8547	1.3610	1.2439	2.2551	1.1252	0.2389	1.48653333333333	1.2064	-0.301243480212865	0.663294301142445	1	no	-	--	-	-	-	-
Unigene0000759	37.6666666666667	27.3333333333333	2.3433	2.3336	3.3516	1.2510	2.0538	1.5799	2.67616666666667	1.62823333333333	-0.716860507871484	0.169292439556379	0.904521780660129	no	-	--	-	-	-	-
Unigene0000760	82	65.6666666666667	2.7142	1.2362	1.9171	1.3094	0.8477	1.5942	1.95583333333333	1.25043333333333	-0.645355293528999	0.191127413342994	0.921989233748307	no	NT5C1A	PREDICTED: cytosolic 5'-nucleotidase 1A-like isoform X2 [Latimeria chalumnae]	ko01100//Metabolic pathways//Global and Overview//Metabolism;ko01110//Biosynthesis of secondary metabolites//Global and Overview//Metabolism;ko00230//Purine metabolism//Nucleotide metabolism//Metabolism;ko00240//Pyrimidine metabolism//Nucleotide metabolism//Metabolism;ko00760//Nicotinate and nicotinamide metabolism//Metabolism of cofactors and vitamins//Metabolism	-	-	-
Unigene0000761	11	8.66666666666667	0.8348	0.6207	0.9118	0.9643	0.2483	0.2918	0.7891	0.501466666666667	-0.654054334077623	0.411106855308545	1	no	-	--	-	-	-	-
Unigene0000762	33.3333333333333	29.3333333333333	2.1332	1.8411	2.5518	1.7083	1.3031	1.7046	2.17536666666667	1.572	-0.468657375823528	0.353046833593533	0.991824276908439	no	-	--	-	-	-	-
Unigene0000763	5.66666666666667	14.6666666666667	0.7204	0.5859	0.1311	1.2850	0.6697	0.8186	0.479133333333333	0.924433333333333	0.948142096284507	0.21230221255987	0.933691047849062	no	-	--	-	-	-	-
Unigene0000764	211	207	6.6397	4.3850	5.1529	4.0169	3.7249	5.0092	5.39253333333333	4.25033333333333	-0.343387199903655	0.385219977472184	1	no	-	--	-	-	-	-
Unigene0000765	10.6666666666667	25.6666666666667	0.4486	0.1042	0.8983	1.3336	0.9591	0.7450	0.4837	1.01256666666667	1.06583245423974	0.137145939811199	0.870515458942045	no	Znf354c	PREDICTED: gastrula zinc finger protein XlCGF49.1-like [Sinocyclocheilus rhinocerous]	-	-	-	-
Unigene0000766	9.33333333333333	14.3333333333333	0.3820	0.7989	1.0431	1.4277	0.9943	0.4675	0.741333333333333	0.963166666666667	0.377663081852096	0.665883055045569	1	no	-	--	-	-	-	-
Unigene0000767	77	63	3.7710	2.8865	2.4551	1.4470	1.5176	2.9470	3.03753333333333	1.97053333333333	-0.624314086517097	0.204142778514394	0.929469809857871	no	-	--	-	-	-	-
Unigene0000768	21	12.6666666666667	4.3571	1.8408	1.4421	0.0897	0.0982	3.3235	2.54666666666667	1.17046666666667	-1.12152628854014	0.294364577249335	0.977725172132931	no	-	Nipped-B-like B, partial [Nestor notabilis]	-	-	-	-
Unigene0000769	24.6666666666667	34.6666666666667	4.5548	2.9197	2.8592	4.1621	3.3873	3.9536	3.44456666666667	3.83433333333333	0.154653261041627	0.773576280254703	1	no	-	--	-	-	-	-
Unigene0000770	17.3333333333333	18	0.9523	1.5933	0.4623	0.9490	0.9443	0.5327	1.00263333333333	0.808666666666667	-0.310177053823665	0.639087610186148	1	no	-	--	-	-	-	-
Unigene0000771	7	1.66666666666667	0.5944	0.4144	1.5150	0.5049	0.0000	0.0000	0.841266666666667	0.1683	-2.32152800514028	0.0521409469643	0.718978770123404	no	-	--	-	-	-	-
Unigene0000772	169.666666666667	323.333333333333	5.4560	8.7808	7.8722	8.7876	15.1403	10.9857	7.36966666666667	11.6378666666667	0.659155350386849	0.104975024890721	0.830130872186547	no	-	PREDICTED: cytochrome c oxidase copper chaperone [Anolis carolinensis]	ko01100//Metabolic pathways//Global and Overview//Metabolism;ko00190//Oxidative phosphorylation//Energy metabolism//Metabolism	-	-	-
Unigene0000773	5.33333333333333	70.6666666666667	0.8608	0.3200	0.1254	0.8773	0.8322	11.0747	0.4354	4.2614	3.29091416505234	0.00116068358354856	0.144294379462001	no	-	--	-	-	-	-
Unigene0000774	14	22	0.6270	0.7909	0.2935	0.5477	1.2323	0.3445	0.570466666666667	0.708166666666667	0.311946347954902	0.65651577304585	1	no	-	PREDICTED: E3 ubiquitin-protein ligase CBL-like [Sinocyclocheilus anshuiensis]	-	GO:0005623//cell;GO:0005622//intracellular;GO:0043227//membrane-bounded organelle;GO:0043231//intracellular membrane-bounded organelle;GO:0044464//cell part;GO:0044424//intracellular part;GO:0043229//intracellular organelle;GO:0043226//organelle	GO:0019787//ubiquitin-like protein transferase activity;GO:0045309//protein phosphorylated amino acid binding;GO:0043167//ion binding;GO:0043169//cation binding;GO:0005515//protein binding;GO:0005488//binding;GO:0016740//transferase activity;GO:0046914//transition metal ion binding;GO:0046872//metal ion binding;GO:0003824//catalytic activity;GO:0051219//phosphoprotein binding	GO:0009987//cellular process;GO:0051716//cellular response to stimulus;GO:0050794//regulation of cellular process;GO:0044700//single organism signaling;GO:0044763//single-organism cellular process;GO:0065007//biological regulation;GO:0007165//signal transduction;GO:0050789//regulation of biological process;GO:0044699//single-organism process;GO:0050896//response to stimulus;GO:0023052//signaling;…
Unigene0000775	31.3333333333333	20.6666666666667	1.4699	0.8073	2.8705	2.1792	0.3975	0.2803	1.7159	0.952333333333333	-0.849426941696971	0.277453325958878	0.969981246014257	no	-	--	-	-	-	-
Unigene0000776	69	99	0.5805	1.0055	0.7781	0.5558	1.5501	0.7103	0.788033333333333	0.938733333333333	0.252458732539453	0.632818846443933	1	no	SLC5A5	PREDICTED: sodium/iodide cotransporter [Sinocyclocheilus grahami]	-	GO:0044425//membrane part;GO:0016020//membrane;GO:0031224//intrinsic component of membrane	-	GO:0044699//single-organism process;GO:0009987//cellular process;GO:0044763//single-organism cellular process
Unigene0000777	765	685	20.9632	32.1284	23.9631	16.6006	23.0978	16.5710	25.6849	18.7564666666667	-0.453532377481416	0.200685992802075	0.927961989248299	no	LAMP1	--	ko04145//Phagosome//Transport and catabolism//Cellular Processes;ko04142//Lysosome//Transport and catabolism//Cellular Processes	-	-	-
Unigene0000778	1823.33333333333	1773.66666666667	24.9959	35.6419	26.1259	18.0195	30.1355	20.6105	28.9212333333333	22.9218333333333	-0.335406638401495	0.324124114023546	0.98600369575474	no	LAMP1	PREDICTED: lysosome-associated membrane glycoprotein 1-like [Sinocyclocheilus anshuiensis]	ko04145//Phagosome//Transport and catabolism//Cellular Processes;ko04142//Lysosome//Transport and catabolism//Cellular Processes	-	-	-
Unigene0000779	16	8.66666666666667	0.7310	0.9060	1.5969	0.7175	0.3624	0.3976	1.07796666666667	0.4925	-1.13011693748278	0.0950366494231793	0.817119341023912	no	-	--	-	-	-	-
Unigene0000780	3.33333333333333	1.66666666666667	0.5774	0.0000	0.4204	0.1569	0.1717	0.0807	0.3326	0.136433333333333	-1.28559200256534	0.298451609211464	0.978762659211149	no	zgc:103499	--	-	-	-	-
Unigene0000781	101.333333333333	74.6666666666667	14.5927	11.9156	10.2286	7.7841	3.6511	9.9175	12.2456333333333	7.11756666666667	-0.782811384601723	0.11147682112237	0.837994216452931	no	-	--	-	-	-	-
Unigene0000782	924.666666666667	1319	21.9579	19.5263	23.5386	25.8378	28.2583	21.9389	21.6742666666667	25.345	0.225717982210891	0.48799282846789	1	no	zgc:162885	PREDICTED: mitochondrial inner membrane protease ATP23 homolog isoform X1 [Sinocyclocheilus grahami]	-	-	GO:0008233//peptidase activity;GO:0070011//peptidase activity, acting on L-amino acid peptides;GO:0043169//cation binding;GO:0004175//endopeptidase activity;GO:0005488//binding;GO:0016787//hydrolase activity;GO:0003824//catalytic activity;GO:0043167//ion binding	GO:0010467//gene expression;GO:0071704//organic substance metabolic process;GO:0043170//macromolecule metabolic process;GO:0008152//metabolic process;GO:0044238//primary metabolic process;GO:0006508//proteolysis;GO:0016485//protein processing;GO:0051604//protein maturation;GO:0019538//protein metabolic process
Unigene0000783	724.333333333333	920.666666666667	4.6615	5.6930	5.1544	5.9549	5.8999	4.2022	5.16963333333333	5.35233333333333	0.0501060090180878	0.883924922845792	1	no	PACS2	PREDICTED: phosphofurin acidic cluster sorting protein 2-like isoform X2 [Sinocyclocheilus anshuiensis]	-	-	-	-
Unigene0000784	8	5	0.7344	0.2560	0.8690	0.3743	0.4779	0.1284	0.6198	0.326866666666667	-0.923100494021685	0.261158641413367	0.961214133676084	no	-	--	-	-	-	-
Unigene0000785	17.3333333333333	16.6666666666667	0.7498	0.4181	1.0191	0.4755	0.6691	0.6291	0.729	0.591233333333333	-0.302191204609701	0.629118465719133	1	no	-	--	-	-	-	-
Unigene0000786	52.3333333333333	35	1.1853	2.6626	2.6973	1.4766	1.2855	0.8979	2.18173333333333	1.22	-0.838593628397595	0.11745077785063	0.849219322132657	no	-	PREDICTED: S-antigen protein-like [Cavia porcellus]	-	-	-	-
Unigene0000787	102	95.6666666666667	6.9209	5.1957	5.7179	4.4765	4.4045	4.6066	5.94483333333333	4.49586666666667	-0.403037113416295	0.339127776681133	0.988364039424551	no	-	--	-	-	-	-
Unigene0000788	28.3333333333333	33.3333333333333	1.3094	1.5947	0.5918	0.4909	2.6190	0.1894	1.1653	1.09976666666667	-0.0835039514392925	0.93897168704857	1	no	-	PREDICTED: homeobox expressed in ES cells 1-A-like [Sinocyclocheilus anshuiensis]	-	-	-	-
Unigene0000789	2	2.66666666666667	0.4002	0.0000	0.0583	0.1088	0.0595	0.2799	0.152833333333333	0.1494	-0.0327790849720201	1	1	no	-	PREDICTED: IgGFc-binding protein-like [Cyprinus carpio]	-	-	-	-
Unigene0000790	53.6666666666667	62.3333333333333	1.1171	1.3350	1.2589	0.9940	1.3252	1.2088	1.237	1.176	-0.0729574401400056	0.882584735709485	1	no	pol	PREDICTED: uncharacterized protein LOC109098236 [Cyprinus carpio]	-	-	-	-
Unigene0000791	1211.33333333333	1124	6.0986	7.3068	7.5688	4.7632	5.3926	5.8294	6.9914	5.3284	-0.391878989682339	0.225711940322841	0.943265792531584	no	pol	PREDICTED: uncharacterized protein LOC109070003 [Cyprinus carpio]	-	-	-	-
Unigene0000792	86	39	1.6095	2.2710	0.6919	0.7379	0.3317	0.5152	1.52413333333333	0.528266666666667	-1.52865083272981	0.0064182455983178	0.335669154618872	no	inaW	PREDICTED: extensin-1-like [Nannospalax galili]	-	-	-	-
Unigene0000793	16.3333333333333	11.6666666666667	1.5569	1.7572	1.4576	1.5869	0.6616	0.4666	1.59056666666667	0.905033333333333	-0.813498007683288	0.236622454269621	0.949329510768927	no	-	--	-	-	-	-
Unigene0000794	29.3333333333333	48.6666666666667	2.9399	1.1800	1.2163	1.6798	3.4782	1.8220	1.77873333333333	2.32666666666667	0.38741429689877	0.497855434326359	1	no	hba1	PREDICTED: hemoglobin embryonic subunit alpha-like [Sinocyclocheilus rhinocerous]	-	GO:0032991//macromolecular complex;GO:0043234//protein complex	GO:0022892//substrate-specific transporter activity;GO:0005215//transporter activity;GO:0046906//tetrapyrrole binding;GO:0046872//metal ion binding;GO:0043167//ion binding;GO:1901363//heterocyclic compound binding;GO:0005488//binding;GO:0097159//organic cyclic compound binding;GO:0046914//transition metal ion binding;GO:0043169//cation binding	GO:1902578//single-organism localization;GO:0044765//single-organism transport;GO:0051234//establishment of localization;GO:0006810//transport;GO:0015669//gas transport;GO:0044699//single-organism process;GO:0051179//localization
Unigene0000795	535.666666666667	561	8.5328	9.1150	10.3063	7.3916	8.9769	7.7477	9.31803333333333	8.03873333333333	-0.213057298163608	0.52928757178566	1	no	-	--	-	-	-	-
Unigene0000796	0.333333333333333	0.666666666666667	0.0000	0.1345	0.0000	0.0000	0.0000	0.2024	0.0448333333333333	0.0674666666666667	0.589603117250325	1	1	no	-	--	-	-	-	-
Unigene0000797	245.333333333333	170	2.3212	4.3149	2.1201	1.6501	1.6863	1.5011	2.91873333333333	1.6125	-0.856043246175571	0.0414054221669102	0.677216064233478	no	-	--	-	-	-	-
Unigene0000798	358.666666666667	211.666666666667	22.5096	9.7092	12.2172	5.9986	4.9840	9.6633	14.812	6.88196666666667	-1.1058736452218	0.0129665389093266	0.449719611079169	no	-	PREDICTED: uncharacterized protein LOC109201215 isoform X3 [Oreochromis niloticus]	-	-	-	-
Unigene0000799	538	467.666666666667	4.8092	4.0769	4.1112	2.6554	3.6722	2.8355	4.33243333333333	3.05436666666667	-0.504304286314213	0.146449252484968	0.881088357469277	no	abhd11	PREDICTED: protein ABHD11 isoform X1 [Sinocyclocheilus anshuiensis]	-	-	-	-
Unigene0000800	84.6666666666667	56	1.5942	2.1965	0.5872	0.8029	0.5300	0.8786	1.4593	0.737166666666667	-0.985213758615828	0.0713060237622778	0.77362972490183	no	-	pol-like protein [Danio rerio]	-	-	-	-
Unigene0000801	18.3333333333333	27.6666666666667	1.2680	0.9107	0.6715	1.2140	0.5572	1.5717	0.950066666666667	1.1143	0.230037041127683	0.720153770244712	1	no	-	--	-	-	-	-
Unigene0000802	2.66666666666667	2	0.2637	0.0817	0.0000	0.0896	0.0000	0.0922	0.115133333333333	0.0606	-0.925915883334813	0.548308061375379	1	no	-	PREDICTED: zonadhesin-like [Sinocyclocheilus grahami]	-	-	-	-
Unigene0000803	0	0	0.0000	0.0000	0.0000	0.0000	0.0000	0.0000	0.001	0.001	0	notest	notest	notest	-	PREDICTED: zonadhesin-like [Sinocyclocheilus grahami]	-	-	-	-
Unigene0000804	0	0	0.0000	0.0000	0.0000	0.0000	0.0000	0.0000	0.001	0.001	0	notest	notest	notest	-	PREDICTED: zonadhesin-like [Sinocyclocheilus grahami]	-	-	-	-
Unigene0000805	0.666666666666667	0	0.0970	0.0000	0.0000	0.0000	0.0000	0.0000	0.0323333333333333	0.001	-5.01495034146597	0.555885942839341	1	no	-	PREDICTED: zonadhesin-like [Sinocyclocheilus grahami]	-	-	-	-
Unigene0000806	2189.33333333333	2250.66666666667	11.8779	11.4300	10.2566	9.3888	7.9017	10.4111	11.1881666666667	9.23386666666667	-0.276966844757474	0.367914237886227	0.996469447253902	no	C2CD2	PREDICTED: C2 domain-containing protein 2-like isoform X2 [Sinocyclocheilus rhinocerous]	-	-	-	-
Unigene0000807	55.3333333333333	42.3333333333333	1.8535	4.5481	4.0489	2.1662	1.9297	2.5402	3.4835	2.21203333333333	-0.655164437451462	0.203177486125546	0.929167928027899	no	-	--	-	-	-	-
Unigene0000808	13.6666666666667	14.6666666666667	0.6526	0.3466	0.6449	0.5384	0.4160	0.4889	0.548033333333333	0.4811	-0.187926846269625	0.773159006444865	1	no	-	PREDICTED: scavenger receptor cysteine-rich type 1 protein M130-like [Sinocyclocheilus grahami]	-	-	-	-
Unigene0000809	17.6666666666667	16	1.2568	0.9222	0.9152	0.5843	0.6395	1.0176	1.0314	0.747133333333333	-0.465166316346513	0.45739724045623	1	no	-	reverse transcriptase [Danio rerio]	-	-	-	-
Unigene0000810	3517.66666666667	3756.33333333333	9.2683	10.7841	13.7776	8.8520	12.5231	8.8271	11.2766666666667	10.0674	-0.163649534419668	0.609935369438351	1	no	NAV2	PREDICTED: neuron navigator 2-like [Sinocyclocheilus anshuiensis]	-	-	-	-
Unigene0000811	45	53.3333333333333	1.6616	1.7590	1.9493	1.7249	1.2700	2.1946	1.78996666666667	1.72983333333333	-0.0492996782049161	0.933769708908523	1	no	rpl36	PREDICTED: 60S ribosomal protein L36 [Astyanax mexicanus]	ko03010//Ribosome//Translation//Genetic Information Processing	GO:0030529//intracellular ribonucleoprotein complex;GO:0032991//macromolecular complex;GO:1990904//ribonucleoprotein complex;GO:0005623//cell;GO:0044424//intracellular part;GO:0044464//cell part;GO:0005622//intracellular	-	GO:0048856//anatomical structure development;GO:0048731//system development;GO:0007399//nervous system development;GO:0071704//organic substance metabolic process;GO:0007049//cell cycle;GO:0044707//single-multicellular organism process;GO:0007417//central nervous system development;GO:0009987//cellular process;GO:0032501//multicellular organismal process;GO:0007275//multicellular organism develop…
Unigene0000812	6273.66666666667	7807.66666666667	45.4171	39.3414	53.4371	46.7524	38.7728	55.6475	46.0652	47.0575666666667	0.0307494443848531	0.920612827276971	1	no	Ttll4	tubulin polyglutamylase TTLL4 [Chanodichthys ilishaeformis]	-	-	-	GO:0043412//macromolecule modification;GO:0036211//protein modification process;GO:0043170//macromolecule metabolic process;GO:0044238//primary metabolic process;GO:0019538//protein metabolic process;GO:0071704//organic substance metabolic process;GO:0008152//metabolic process
Unigene0000813	5	5	0.0000	0.2926	0.2619	0.1222	0.3678	0.0000	0.184833333333333	0.163333333333333	-0.17840571115914	0.935317290524879	1	no	-	--	-	-	-	-
Unigene0000814	4	5.33333333333333	0.8470	0.0984	0.2313	0.3597	0.7086	0.1481	0.392233333333333	0.405466666666667	0.0478711697370288	1	1	no	-	--	-	-	-	-
Unigene0000815	20	16.3333333333333	1.3019	0.8251	0.9911	0.4021	0.7042	0.9517	1.03936666666667	0.686	-0.599424214947709	0.322521148066392	0.98562796532745	no	-	PREDICTED: uncharacterized protein LOC108180325 [Danio rerio]	-	-	-	-
Unigene0000816	29.6666666666667	20.6666666666667	1.3097	0.7378	1.0404	0.1079	0.9445	0.7215	1.0293	0.5913	-0.799701349514169	0.249322211648852	0.956410272242434	no	-	PREDICTED: LOW QUALITY PROTEIN: tetra-peptide repeat homeobox protein 1-like [Coturnix japonica]	-	-	-	-
Unigene0000817	13.6666666666667	17	1.4937	1.6486	0.4079	1.2052	1.5967	0.5875	1.1834	1.1298	-0.0668703944146297	0.96405812038774	1	no	-	--	-	-	-	-
Unigene0000818	23	60	0.1598	0.5644	1.0472	0.7166	2.2578	1.1620	0.590466666666667	1.3788	1.22348568055958	0.0729004739721611	0.777362117617904	no	nadX	PREDICTED: putative L-aspartate dehydrogenase isoform X1 [Cyprinus carpio]	-	-	GO:0000166//nucleotide binding;GO:0016638//oxidoreductase activity, acting on the CH-NH2 group of donors;GO:0097159//organic cyclic compound binding;GO:0036094//small molecule binding;GO:0016491//oxidoreductase activity;GO:1901265//nucleoside phosphate binding;GO:1901363//heterocyclic compound binding;GO:0003824//catalytic activity;GO:0005488//binding	GO:0046496//nicotinamide nucleotide metabolic process;GO:1901564//organonitrogen compound metabolic process;GO:0008152//metabolic process;GO:0009165//nucleotide biosynthetic process;GO:1901362//organic cyclic compound biosynthetic process;GO:0018130//heterocycle biosynthetic process;GO:0006739//NADP metabolic process;GO:0090407//organophosphate biosynthetic process;GO:0019359//nicotinamide nucleo…
Unigene0000819	65.3333333333333	120.333333333333	0.4020	1.1923	1.5056	0.6504	3.9296	0.4685	1.0333	1.68283333333333	0.703633124731112	0.342947529197661	0.98851285353877	no	CDHR5	PREDICTED: cadherin-related family member 5-like [Sinocyclocheilus anshuiensis]	-	-	-	-
Unigene0000820	42.3333333333333	52.6666666666667	1.9336	1.2539	1.7681	1.1305	1.8058	2.1066	1.65186666666667	1.68096666666667	0.0251938746368997	0.983496678752616	1	no	-	--	-	-	-	-
Unigene0000821	35	30.3333333333333	5.0389	3.0623	1.3406	1.7778	2.7384	1.7617	3.14726666666667	2.09263333333333	-0.58877987495223	0.32620085475599	0.986257244212436	no	-	--	-	-	-	-
Unigene0000822	447.666666666667	429	2.8536	3.8173	3.6249	2.4342	2.7501	2.9090	3.43193333333333	2.69776666666667	-0.34725595506675	0.319868322537858	0.984430566870593	no	NCAM2	PREDICTED: neural cell adhesion molecule 2-like [Sinocyclocheilus rhinocerous]	ko04514//Cell adhesion molecules (CAMs)//Signaling molecules and interaction//Environmental Information Processing	-	-	-
Unigene0000823	137.666666666667	146.666666666667	2.8194	3.1314	2.6793	2.2405	3.1984	2.0382	2.8767	2.49236666666667	-0.206898448496208	0.620053146858999	1	no	tmem120a	PREDICTED: transmembrane protein 120A-like [Sinocyclocheilus grahami]	-	-	-	-
Unigene0000824	620.333333333333	340.333333333333	9.9793	4.9760	10.7526	3.6376	4.8833	3.2118	8.5693	3.9109	-1.13167671232778	0.00478694023989695	0.293773145568431	no	Trim35	PREDICTED: tripartite motif-containing protein 35-like isoform X1 [Sinocyclocheilus anshuiensis]	-	-	-	-
Unigene0000825	52	52.3333333333333	1.9359	1.4944	1.1468	1.2485	1.7569	0.6653	1.5257	1.22356666666667	-0.318378601862436	0.55129995083945	1	no	-	--	-	-	-	-
Unigene0000826	0	0	0.0000	0.0000	0.0000	0.0000	0.0000	0.0000	0.001	0.001	0	notest	notest	notest	-	--	-	-	-	-
Unigene0000827	111.666666666667	125.666666666667	2.6840	3.9500	4.0445	2.5836	4.4356	2.9976	3.5595	3.33893333333333	-0.0922873130719871	0.835803211913778	1	no	-	--	-	-	-	-
Unigene0000828	8.66666666666667	6.66666666666667	0.3393	1.1564	0.9883	0.3843	0.9252	0.3163	0.828	0.541933333333333	-0.611515380324396	0.461610945484265	1	no	-	--	-	-	-	-
Unigene0000829	34.6666666666667	37.3333333333333	1.0866	0.9378	1.4128	0.8965	1.3564	0.8412	1.14573333333333	1.03136666666667	-0.151713975266902	0.768299603171656	1	no	SPOCK2	PREDICTED: testican-2-like isoform X2 [Sinocyclocheilus anshuiensis]	-	-	-	-
Unigene0000830	3.66666666666667	3.33333333333333	0.1248	0.0580	0.1136	0.0848	0.1392	0.0000	0.0988	0.0746666666666667	-0.404046715360867	0.784557848275122	1	no	FAM19A4	PREDICTED: protein FAM19A4-like isoform X1 [Sinocyclocheilus anshuiensis]	-	-	-	-
Unigene0000831	341	396.333333333333	1.4901	1.1524	2.2487	1.5419	1.9709	1.2885	1.6304	1.60043333333333	-0.0267633744986123	0.946793913434081	1	no	RYR3	PREDICTED: ryanodine receptor 3-like [Sinocyclocheilus anshuiensis]	ko04020//Calcium signaling pathway//Signal transduction//Environmental Information Processing	-	-	-
Unigene0000832	45.3333333333333	38.3333333333333	4.7610	4.5988	2.1752	3.3619	3.0546	1.1749	3.845	2.53046666666667	-0.603580128049686	0.297396155535343	0.978181732372321	no	-	--	-	-	-	-
Unigene0000833	25324	30513.3333333333	192.8715	160.8276	178.1129	178.1635	132.2740	206.6477	177.270666666667	172.361733333333	-0.0405143184302273	0.894832465338421	1	no	Caprin1	PREDICTED: caprin-1-like isoform X1 [Sinocyclocheilus rhinocerous]	-	-	-	-
Unigene0000834	3	8	0.3249	0.4027	0.1577	0.1472	0.2416	1.4388	0.2951	0.6092	1.04571202105529	0.306928375070369	0.981120102391214	no	-	--	-	-	-	-
Unigene0000835	874	1319.66666666667	3.3674	2.8185	3.7550	3.6866	4.1201	4.5334	3.31363333333333	4.11336666666667	0.31190570834931	0.341596386767555	0.988364039424551	no	PTPRZ1	PREDICTED: receptor-type tyrosine-protein phosphatase zeta-like [Sinocyclocheilus anshuiensis]	-	-	-	-
Unigene0000836	3.33333333333333	6.33333333333333	1.0214	0.1055	0.0000	0.2314	0.8440	0.4761	0.375633333333333	0.517166666666667	0.461304199018494	0.719237030293547	1	no	-	--	-	-	-	-
Unigene0000837	14.3333333333333	5.33333333333333	1.4604	1.7751	1.0634	0.0000	0.0835	1.1783	1.43296666666667	0.4206	-1.76848429517557	0.074458346235328	0.781753361928565	no	-	--	-	-	-	-
Unigene0000838	10.6666666666667	19.3333333333333	0.5780	0.6268	1.3328	0.8510	1.5761	1.5493	0.845866666666667	1.32546666666667	0.647998213791506	0.360527345933063	0.995153554830312	no	-	--	-	-	-	-
Unigene0000839	3.66666666666667	8.66666666666667	0.0000	0.7575	0.4945	1.1075	1.2121	0.1899	0.417333333333333	0.8365	1.00316538382689	0.353436165336511	0.991948696020473	no	-	--	-	-	-	-
Unigene0000840	1215	1386	7.0215	6.9044	7.1763	5.7768	7.8795	6.0332	7.03406666666667	6.56316666666667	-0.0999669387183114	0.757112550658669	1	no	CCNT1	PREDICTED: cyclin-T1-like isoform X1 [Sinocyclocheilus grahami]	-	-	-	GO:0065007//biological regulation;GO:0006807//nitrogen compound metabolic process;GO:0006725//cellular aromatic compound metabolic process;GO:0034654//nucleobase-containing compound biosynthetic process;GO:0046483//heterocycle metabolic process;GO:0010467//gene expression;GO:1901360//organic cyclic compound metabolic process;GO:0071704//organic substance metabolic process;GO:0006139//nucleobase-c…
Unigene0000841	26	10.6666666666667	0.5310	1.0693	1.2887	0.4510	0.1974	0.3403	0.963	0.329566666666667	-1.5469654665506	0.0147711869405698	0.471803266856298	no	-	--	-	-	-	-
Unigene0000842	59	25.3333333333333	2.7676	1.4841	1.3952	0.9403	0.2375	0.6947	1.8823	0.624166666666667	-1.59249336441816	0.00782907525291182	0.365923511450368	no	-	--	-	-	-	-
Unigene0000843	1.66666666666667	4.66666666666667	0.0000	0.0000	0.4118	1.0760	0.0000	0.0000	0.137266666666667	0.358666666666667	1.38566234281173	0.563270537047263	1	no	-	--	-	-	-	-
Unigene0000844	228.333333333333	304	2.4183	1.6625	4.0740	3.1308	2.7455	3.3218	2.71826666666667	3.06603333333333	0.173686387859515	0.683670470388321	1	no	Igsf5	PREDICTED: immunoglobulin superfamily member 5-like [Sinocyclocheilus rhinocerous]	ko04530//Tight junction//Cellular commiunity//Cellular Processes	-	-	-
Unigene0000845	540.666666666667	507	8.2928	6.2779	7.2148	4.9134	3.5469	7.9716	7.26183333333333	5.4773	-0.406868918040121	0.295056321099301	0.977725172132931	no	-	--	-	-	-	-
Unigene0000846	16	15.6666666666667	1.6709	0.5177	0.8111	0.3785	1.1908	0.7789	0.9999	0.782733333333333	-0.353262933647071	0.656174636334359	1	no	-	PREDICTED: astrotactin-2-like [Sinocyclocheilus grahami]	-	-	-	-
Unigene0000847	93	100.333333333333	1.8273	1.7370	1.5271	1.3827	2.0538	1.0163	1.69713333333333	1.48426666666667	-0.193349599952946	0.672832422086698	1	no	zgc:171711	PREDICTED: repressor of yield of DENV protein homolog [Sinocyclocheilus rhinocerous]	-	-	-	-
Unigene0000848	329.666666666667	314.333333333333	2.2650	2.3439	3.1183	1.4331	2.6391	2.0903	2.57573333333333	2.05416666666667	-0.326429997639686	0.401183047402555	1	no	-	PREDICTED: titin-like [Sinocyclocheilus anshuiensis]	-	-	-	-
Unigene0000849	4	1.66666666666667	0.9038	0.5601	0.2194	0.2047	0.1120	0.2107	0.5611	0.1758	-1.67432284232668	0.121067432039539	0.854663605032819	no	-	--	-	-	-	-
Unigene0000850	1.66666666666667	0.666666666666667	0.3674	0.0000	0.0000	0.0000	0.0000	0.1028	0.122466666666667	0.0342666666666667	-1.83751136191747	0.532033481085492	1	no	-	--	-	-	-	-
Unigene0000851	11.6666666666667	5	0.6555	1.1509	0.4773	0.3464	0.4333	0.0000	0.761233333333333	0.2599	-1.55038210276476	0.0749182023052508	0.783140970672278	no	-	--	-	-	-	-
Unigene0000852	34.3333333333333	24.3333333333333	0.5923	1.2663	0.7979	0.4025	0.6387	0.4970	0.8855	0.512733333333333	-0.788283615070971	0.155271087224934	0.891570442191837	no	-	PREDICTED: interleukin-15 receptor subunit alpha isoform X1 [Sinocyclocheilus rhinocerous]	ko04060//Cytokine-cytokine receptor interaction//Signaling molecules and interaction//Environmental Information Processing;ko04630//Jak-STAT signaling pathway//Signal transduction//Environmental Information Processing;ko04672//Intestinal immune network for IgA production//Immune system//Organismal Systems	-	-	-
Unigene0000853	1498	2191.66666666667	10.1527	11.5449	13.0160	15.7542	16.3387	9.8052	11.5712	13.9660333333333	0.271383833202918	0.416714840493047	1	no	Sapcd2	suppressor APC domain-containing protein 2 [Danio rerio]	-	-	-	-
Unigene0000854	17523.6666666667	26146.6666666667	118.2044	137.8803	136.1942	188.2007	163.1617	126.1427	130.759633333333	159.168366666667	0.283636404511553	0.349374909351394	0.990475888124468	no	cct3	PREDICTED: T-complex protein 1 subunit gamma-like [Sinocyclocheilus grahami]	-	GO:0044464//cell part;GO:0005623//cell;GO:0005622//intracellular;GO:0044424//intracellular part	GO:0005515//protein binding;GO:0001883//purine nucleoside binding;GO:0005488//binding;GO:0032549//ribonucleoside binding;GO:0036094//small molecule binding;GO:0097367//carbohydrate derivative binding;GO:0032550//purine ribonucleoside binding;GO:1901363//heterocyclic compound binding;GO:0001882//nucleoside binding;GO:0097159//organic cyclic compound binding	GO:0050789//regulation of biological process;GO:0044238//primary metabolic process;GO:0010941//regulation of cell death;GO:0065007//biological regulation;GO:0043170//macromolecule metabolic process;GO:0043067//regulation of programmed cell death;GO:0044699//single-organism process;GO:0009987//cellular process;GO:0008152//metabolic process;GO:0048731//system development;GO:0044707//single-multicel…
Unigene0000855	24	25	1.3959	0.8169	1.0541	1.0188	0.9612	0.7592	1.08896666666667	0.913066666666667	-0.254167687620604	0.656731297524288	1	no	-	PREDICTED: trichohyalin-like [Sinocyclocheilus rhinocerous]	-	-	-	-
Unigene0000856	1444.33333333333	1312.66666666667	50.0912	73.8237	65.8164	43.5191	71.0297	28.1761	63.2437666666667	47.5749666666667	-0.410720648481468	0.286384622635919	0.975223326960439	no	Tmsb4x	thymosin beta a [Cyprinus carpio]	ko04810//Regulation of actin cytoskeleton//Cell motility//Cellular Processes	GO:0005622//intracellular;GO:0044464//cell part;GO:0005623//cell;GO:0044424//intracellular part	GO:0005488//binding;GO:0008092//cytoskeletal protein binding;GO:0005515//protein binding	GO:0030837//negative regulation of actin filament polymerization;GO:0031333//negative regulation of protein complex assembly;GO:0032956//regulation of actin cytoskeleton organization;GO:0032271//regulation of protein polymerization;GO:0030832//regulation of actin filament length;GO:0051493//regulation of cytoskeleton organization;GO:0065007//biological regulation;GO:0071840//cellular component or…
Unigene0000857	16	10.6666666666667	0.5298	0.7113	1.1144	0.4400	0.2189	0.6585	0.785166666666667	0.439133333333333	-0.838339876769144	0.209897910389304	0.933242411519553	no	MOG	PREDICTED: butyrophilin subfamily 1 member A1-like [Cyprinus carpio]	-	-	-	-
Unigene0000858	1338	1561	15.2304	11.8059	13.5650	14.4315	10.4809	13.2774	13.5337666666667	12.7299333333333	-0.0883385567540775	0.786051354002281	1	no	HNRNPUL1	PREDICTED: heterogeneous nuclear ribonucleoprotein U-like protein 2 isoform X1 [Sinocyclocheilus rhinocerous]	-	-	-	-
Unigene0000859	3.33333333333333	0.666666666666667	0.1637	0.0000	0.4767	0.1112	0.0000	0.0000	0.213466666666667	0.0370666666666667	-2.52581651979275	0.19886553822195	0.925828471885579	no	-	--	-	-	-	-
Unigene0000860	101.666666666667	129	3.9749	2.4037	5.8585	4.0025	5.8408	3.3486	4.07903333333333	4.3973	0.108390665180862	0.82714851547439	1	no	-	--	-	-	-	-
Unigene0000861	118.666666666667	38	3.1555	0.4292	1.3562	0.1883	0.4350	0.6242	1.64696666666667	0.415833333333333	-1.98573404148498	0.0036337883149136	0.254677652729969	no	-	--	-	-	-	-
Unigene0000862	151	117.666666666667	5.7714	2.3617	5.9205	2.4664	3.7521	2.8934	4.68453333333333	3.0373	-0.625115922453026	0.182257160773448	0.916761001252999	no	-	--	-	-	-	-
Unigene0000863	17	33.3333333333333	0.0919	0.3701	0.7806	1.0822	1.0478	0.0428	0.4142	0.724266666666667	0.806193425303064	0.392303832889885	1	no	-	--	-	-	-	-
Unigene0000864	1157	1334	15.1994	15.5729	17.2551	14.5437	17.8013	13.1614	16.0091333333333	15.1688	-0.0777882497167872	0.810585041507161	1	no	ZFAND5	PREDICTED: AN1-type zinc finger protein 5-like isoform X1 [Sinocyclocheilus anshuiensis]	-	-	GO:0043167//ion binding;GO:0046914//transition metal ion binding;GO:0005488//binding;GO:0046872//metal ion binding;GO:0043169//cation binding	-
Unigene0000865	9.66666666666667	12.6666666666667	0.6092	0.2265	0.6654	0.3311	0.6796	0.6389	0.500366666666667	0.549866666666667	0.136096148469303	0.895712333161503	1	no	-	--	-	-	-	-
Unigene0000866	213	193	2.5451	4.6976	2.8653	3.1275	2.8860	1.3757	3.36933333333333	2.46306666666667	-0.452007486448262	0.314620788151135	0.982253730736894	no	-	--	-	-	-	-
Unigene0000867	52.3333333333333	20.6666666666667	2.7224	1.6532	0.8722	0.4440	0.2429	0.8883	1.74926666666667	0.525066666666667	-1.73617772180008	0.00622958003052345	0.331782309716696	no	-	--	-	-	-	-
Unigene0000868	170	149.666666666667	1.6956	2.5528	1.9693	1.3616	1.6256	1.4697	2.07256666666667	1.48563333333333	-0.480340417864434	0.231367012796628	0.947690712061642	no	-	PREDICTED: uncharacterized protein LOC103909920 [Danio rerio]	-	-	-	-
Unigene0000869	46.6666666666667	37.3333333333333	0.8879	1.0316	0.8082	0.4826	1.0565	0.2483	0.909233333333333	0.5958	-0.609822452069831	0.293407400174649	0.977725172132931	no	Sowahc	PREDICTED: ankyrin repeat domain-containing protein SOWAHD-like [Sinocyclocheilus rhinocerous]	-	-	-	-
Unigene0000870	0	2.66666666666667	0.0000	0.0000	0.0000	0.1831	0.0668	0.2512	0.001	0.167033333333333	7.38399222682106	0.042561298248053	0.682753312356297	no	-	--	-	-	-	-
Unigene0000871	12.6666666666667	16.6666666666667	2.6512	1.5059	0.9653	0.9007	0.3286	3.9136	1.70746666666667	1.7143	0.00576218671729164	1	1	no	-	--	-	-	-	-
Unigene0000872	24.6666666666667	40	0.7832	1.0920	1.2119	2.3948	0.5097	1.1638	1.02903333333333	1.3561	0.398173851982813	0.522894593048939	1	no	-	--	-	-	-	-
Unigene0000873	160.333333333333	222	2.8417	2.3736	2.7962	2.3745	3.3412	3.3564	2.6705	3.02403333333333	0.179364157964404	0.651682403625411	1	no	-	PREDICTED: LOW QUALITY PROTEIN: scavenger receptor cysteine-rich domain-containing group B protein-like [Chrysemys picta bellii]	-	-	-	-
Unigene0000874	621	881	6.7530	6.6063	12.8095	11.8843	10.8725	8.7472	8.72293333333333	10.5013333333333	0.267687246866508	0.481280514874711	1	no	-	--	-	-	-	-
Unigene0000875	7369	5726.33333333333	190.2888	323.9015	131.2193	148.9427	172.7344	74.9752	215.136533333333	132.217433333333	-0.702340122506503	0.08162454919254	0.795237661962308	no	tmsb	PREDICTED: thymosin beta-4 [Pygocentrus nattereri]	ko04810//Regulation of actin cytoskeleton//Cell motility//Cellular Processes	GO:0005737//cytoplasm;GO:0044464//cell part;GO:0044424//intracellular part;GO:0005622//intracellular;GO:0005623//cell	GO:0005515//protein binding;GO:0005488//binding;GO:0008092//cytoskeletal protein binding	GO:0071840//cellular component organization or biogenesis;GO:0051494//negative regulation of cytoskeleton organization;GO:0050789//regulation of biological process;GO:0051128//regulation of cellular component organization;GO:0010639//negative regulation of organelle organization;GO:0030832//regulation of actin filament length;GO:0044763//single-organism cellular process;GO:0048523//negative regul…
Unigene0000876	68	114.333333333333	1.4108	1.6456	1.7927	1.7669	2.2218	2.7273	1.61636666666667	2.23866666666667	0.469885224423461	0.290376027753913	0.976407714723147	no	-	PREDICTED: oxysterol-binding protein-related protein 5 isoform X1 [Esox lucius]	-	-	-	-
Unigene0000877	162.333333333333	166	14.1617	14.0584	12.8374	12.2410	10.8181	10.7779	13.6858333333333	11.279	-0.279044119818013	0.475856878017307	1	no	-	--	-	-	-	-
Unigene0000878	0.666666666666667	0	0.0000	0.0000	0.1978	0.0000	0.0000	0.0000	0.0659333333333333	0.001	-6.04293611515059	0.550157827566582	1	no	-	PREDICTED: calcium/calmodulin-dependent protein kinase type IV-like [Pseudopodoces humilis]	ko04020//Calcium signaling pathway//Signal transduction//Environmental Information Processing	-	-	-
Unigene0000879	230.333333333333	286.666666666667	3.3776	3.8314	3.6759	3.7263	4.2538	3.0854	3.6283	3.6885	0.0237404879974416	0.955412788820445	1	no	-	ADP-ribosylation factor GTPase-activating protein 1-like [Scleropages formosus]	-	-	-	-
Unigene0000880	239.666666666667	356.333333333333	4.2902	4.7493	5.7740	7.4842	6.5063	4.1963	4.93783333333333	6.06226666666667	0.295979172688335	0.449913014557929	1	no	ALKBH4	PREDICTED: alpha-ketoglutarate-dependent dioxygenase alkB homolog 4-like [Sinocyclocheilus rhinocerous]	-	-	GO:0003824//catalytic activity	GO:0044699//single-organism process;GO:0008152//metabolic process;GO:0044710//single-organism metabolic process
Unigene0000881	10.6666666666667	10.3333333333333	0.8083	0.5259	0.8829	0.4394	0.6612	0.6782	0.739033333333333	0.592933333333333	-0.3177695331368	0.664412506703578	1	no	-	PREDICTED: uncharacterized protein si:ch211-12e13.10 [Danio rerio]	-	-	-	-
Unigene0000882	29	26	1.6805	1.8744	1.5663	1.0505	1.7997	0.8931	1.70706666666667	1.24776666666667	-0.452171227204014	0.394970148037607	1	no	-	--	-	-	-	-
Unigene0000883	2591.66666666667	2748	16.7912	14.7979	14.6829	13.1699	10.4185	15.8541	15.424	13.1475	-0.230388459861905	0.461722492328922	1	no	CSNK1G1	PREDICTED: casein kinase I-like isoform X2 [Sinocyclocheilus grahami]	ko04340//Hedgehog signaling pathway//Signal transduction//Environmental Information Processing	GO:0005623//cell;GO:0005622//intracellular;GO:0044464//cell part;GO:0044424//intracellular part	GO:0097367//carbohydrate derivative binding;GO:0036094//small molecule binding;GO:0003824//catalytic activity;GO:0004672//protein kinase activity;GO:0032549//ribonucleoside binding;GO:0001882//nucleoside binding;GO:0016772//transferase activity, transferring phosphorus-containing groups;GO:1901363//heterocyclic compound binding;GO:0016301//kinase activity;GO:0005488//binding;GO:0016773//phosphotr…	GO:0044238//primary metabolic process;GO:0007154//cell communication;GO:0044700//single organism signaling;GO:0044237//cellular metabolic process;GO:0044763//single-organism cellular process;GO:0019538//protein metabolic process;GO:0007166//cell surface receptor signaling pathway;GO:0023052//signaling;GO:0006464//cellular protein modification process;GO:0065007//biological regulation;GO:0043412//…
Unigene0000884	506.666666666667	734.666666666667	4.5245	5.9121	8.3326	8.7837	6.9479	7.0668	6.2564	7.59946666666667	0.280565419621598	0.443763052919479	1	no	-	--	-	-	-	-
Unigene0000885	2	5.66666666666667	0.1441	0.4018	0.2098	0.8811	0.1072	0.7053	0.2519	0.564533333333333	1.16420764655219	0.341449854084324	0.988364039424551	no	-	--	-	-	-	-
Unigene0000886	38	43.6666666666667	1.4223	2.0712	1.2773	1.1597	1.5513	1.6907	1.59026666666667	1.46723333333333	-0.116170386375897	0.830251178148154	1	no	-	--	-	-	-	-
Unigene0000887	11.6666666666667	10.6666666666667	1.3025	1.3451	1.6860	0.9833	1.3991	0.9107	1.44453333333333	1.0977	-0.39611967368965	0.575249629146041	1	no	-	--	-	-	-	-
Unigene0000888	62.3333333333333	26.6666666666667	3.6492	0.6230	1.9251	0.4048	0.8030	0.9113	2.06576666666667	0.706366666666667	-1.54818813836645	0.0172289345647074	0.501714044315259	no	-	--	-	-	-	-
Unigene0000889	3.33333333333333	5.66666666666667	0.4991	0.1856	0.2181	0.6783	0.3712	0.1396	0.300933333333333	0.396366666666667	0.397391723180114	0.712630446868186	1	no	-	--	-	-	-	-
Unigene0000890	13	18.6666666666667	1.6634	1.3082	1.3976	1.2172	1.6176	2.2367	1.4564	1.6905	0.215043370336225	0.74863959206453	1	no	-	--	-	-	-	-
Unigene0000891	1.66666666666667	5	0.0000	0.0978	0.3064	1.0008	0.0000	0.0736	0.134733333333333	0.358133333333333	1.41038998304771	0.427035220881617	1	no	-	--	-	-	-	-
Unigene0000892	51	51.6666666666667	3.1880	2.2051	4.2109	2.6699	3.5838	1.9181	3.20133333333333	2.72393333333333	-0.232981508177936	0.64988925417293	1	no	-	--	-	-	-	-
Unigene0000893	490.666666666667	431.333333333333	31.6596	29.0991	29.7279	21.9912	12.5848	29.3354	30.1622	21.3038	-0.501630871435494	0.197510620247653	0.924953151956086	no	-	--	-	-	-	-
Unigene0000894	64	66.3333333333333	1.4065	1.5252	1.8776	1.3539	1.2203	1.5366	1.6031	1.37026666666667	-0.226407739963742	0.627246620833208	1	no	-	--	-	-	-	-
Unigene0000895	874	695	10.8467	13.1103	9.1156	6.5253	7.8431	6.7449	11.0242	7.03776666666667	-0.64748437840785	0.0563927922805149	0.736113180489796	no	SERPINB1	PREDICTED: leukocyte elastase inhibitor-like [Sinocyclocheilus rhinocerous]	-	GO:0005576//extracellular region;GO:0044421//extracellular region part	-	-
Unigene0000896	151.333333333333	124.666666666667	16.0328	10.1567	9.9787	6.9380	7.4602	9.2690	12.0560666666667	7.88906666666667	-0.611832765523075	0.147916824769293	0.883094517112534	no	-	--	-	-	-	-
Unigene0000897	70.3333333333333	76.3333333333333	4.9071	3.8339	4.3499	2.9960	2.6972	5.7683	4.36363333333333	3.8205	-0.19176841987869	0.698989613107639	1	no	-	--	-	-	-	-
Unigene0000898	684.666666666667	643.666666666667	23.3669	18.7122	19.7963	15.0823	11.6444	19.9962	20.6251333333333	15.5743	-0.405236124276107	0.255053213419725	0.959866219128474	no	-	--	-	-	-	-
Unigene0000899	22.6666666666667	11	2.2274	0.6901	1.1795	0.5045	0.4016	0.6607	1.36566666666667	0.522266666666667	-1.38674685941692	0.0351328342570768	0.643981611660074	no	-	--	-	-	-	-
Unigene0000900	8217.66666666667	27377	11.4433	170.3493	14.0730	82.7103	293.6833	137.3595	65.2885333333333	171.251033333333	1.39121115567586	0.0757241759496893	0.784934322089415	no	ITIH3	PREDICTED: inter-alpha-trypsin inhibitor heavy chain H3-like isoform X1 [Sinocyclocheilus anshuiensis]	-	-	-	-
Unigene0000901	13.3333333333333	19.6666666666667	1.2718	0.9735	0.4903	1.7283	1.0014	0.3662	0.911866666666667	1.03196666666667	0.178501577576177	0.798146320268134	1	no	-	PREDICTED: piggyBac transposable element-derived protein 3-like [Lates calcarifer]	-	-	-	-
Unigene0000902	13	12	1.1121	1.0337	0.4859	0.7556	0.5513	0.5702	0.877233333333333	0.6257	-0.48748952890565	0.469513246288314	1	no	-	--	-	-	-	-
Unigene0000903	3.66666666666667	3	0.8018	0.2484	0.2919	0.2724	0.0000	0.5606	0.447366666666667	0.277666666666667	-0.688103770185744	0.599612962238529	1	no	-	--	-	-	-	-
Unigene0000904	18	12.6666666666667	0.3405	2.6373	2.1487	2.0050	1.0128	0.0000	1.70883333333333	1.00593333333333	-0.764476998380822	0.454753360167318	1	no	-	--	-	-	-	-
Unigene0000905	7	16.3333333333333	0.9700	0.3756	0.2354	0.4394	1.5028	0.9043	0.527	0.948833333333333	0.848351732032775	0.281013173064116	0.97253886263826	no	-	--	-	-	-	-
Unigene0000906	39.6666666666667	59.6666666666667	0.6281	0.9452	1.3939	1.7681	0.6673	1.2967	0.989066666666667	1.24403333333333	0.330885470141587	0.549063015766099	1	no	-	--	-	-	-	-
Unigene0000907	35.3333333333333	54	1.1345	0.8627	1.1515	1.6118	0.6136	1.6586	1.04956666666667	1.29466666666667	0.302786892991641	0.571815593680367	1	no	-	--	-	-	-	-
Unigene0000908	7	5.66666666666667	1.0076	0.8325	0.3261	0.3043	0.9159	0.1566	0.722066666666667	0.458933333333333	-0.653847447144183	0.484458269825601	1	no	-	--	-	-	-	-
Unigene0000909	18.6666666666667	36.3333333333333	1.3836	1.0411	0.8636	1.5221	2.1558	1.4281	1.0961	1.702	0.634851611971009	0.242268272670711	0.953490858289291	no	-	--	-	-	-	-
Unigene0000910	1266.66666666667	1275.33333333333	11.7952	13.0812	12.0698	7.3998	11.9198	11.0591	12.3154	10.1262333333333	-0.282365853854608	0.398720520402234	1	no	cipc	PREDICTED: CLOCK-interacting pacemaker [Sinocyclocheilus rhinocerous]	-	-	-	-
Unigene0000911	43	22.6666666666667	5.8961	2.6457	3.1830	0.5526	1.2852	3.0565	3.90826666666667	1.63143333333333	-1.26038887328317	0.0540579033010124	0.728325826068376	no	-	--	-	-	-	-
Unigene0000912	13.6666666666667	3	0.5895	1.5828	0.2861	0.0445	0.1948	0.1832	0.819466666666667	0.140833333333333	-2.54069642553606	0.00628629761435063	0.333578451095377	no	Mpeg1	PREDICTED: macrophage-expressed gene 1 protein-like [Cyprinus carpio]	-	-	-	-
Unigene0000913	742.333333333333	1012	7.9942	9.9021	13.3728	13.8678	14.0159	7.8326	10.4230333333333	11.9054333333333	0.191844937799974	0.608972407956849	1	no	Triobp	PREDICTED: TRIO and F-actin-binding protein-like isoform X2 [Danio rerio]	-	-	-	-
Unigene0000914	12	27	0.4443	0.4818	0.2696	0.3522	1.5145	0.3107	0.398566666666667	0.7258	0.864750998535883	0.235929740698972	0.949329510768927	no	-	--	-	-	-	-
Unigene0000915	190	367	22.2585	8.9651	10.9852	24.5347	23.4804	16.1401	14.0696	21.3850666666667	0.604022391529752	0.167088448087662	0.903027040368864	no	-	--	-	-	-	-
Unigene0000916	1598	2131	35.3746	36.4473	45.6767	47.6054	41.7286	39.8159	39.1662	43.0499666666667	0.136402959256216	0.663938673769156	1	no	fam162b	PREDICTED: protein FAM162B-like [Sinocyclocheilus rhinocerous]	-	-	-	-
Unigene0000917	31.3333333333333	32.6666666666667	0.9717	0.8709	0.9855	0.6838	0.9806	0.7522	0.9427	0.805533333333333	-0.22685443854793	0.669917085772078	1	no	-	--	-	-	-	-
Unigene0000918	52	48.3333333333333	2.3513	2.2680	1.5506	1.4771	2.0455	1.0547	2.05663333333333	1.52576666666667	-0.430750256314853	0.39784373052387	1	no	-	--	-	-	-	-
Unigene0000919	103.333333333333	124.333333333333	2.4506	3.2313	2.1164	2.8850	2.6489	1.9726	2.59943333333333	2.50216666666667	-0.0550192663588288	0.904698563975858	1	no	-	--	-	-	-	-
Unigene0000920	37	32.3333333333333	2.9759	1.8859	1.8222	1.0110	2.3136	1.3714	2.228	1.56533333333333	-0.509279324951139	0.357579850806206	0.994153127578339	no	K02A2.6	Immunoglobulin superfamily member 21, partial [Larimichthys crocea]	-	-	-	-
Unigene0000921	11	19.3333333333333	0.5266	0.2797	0.3013	0.8179	0.2797	0.4208	0.3692	0.506133333333333	0.455114938654178	0.506983384395616	1	no	P2RX7	PREDICTED: P2X purinoceptor 7-like isoform X1 [Nothobranchius furzeri]	-	-	-	-
Unigene0000922	114.333333333333	103.666666666667	5.8133	3.9568	4.0997	3.2036	2.6552	4.1608	4.62326666666667	3.33986666666667	-0.469122069643587	0.28377391491693	0.974418927889951	no	-	PREDICTED: uncharacterized protein LOC107677180 isoform X3 [Sinocyclocheilus anshuiensis]	-	-	-	-
Unigene0000923	51	41.3333333333333	3.0713	1.5194	2.0921	1.3127	0.8473	2.1475	2.2276	1.43583333333333	-0.633601902018498	0.243378932125658	0.954256641351441	no	-	--	-	-	-	-
Unigene0000924	291	250.666666666667	4.0843	3.2604	2.2685	1.8751	2.3532	2.3070	3.2044	2.17843333333333	-0.556763285160025	0.153080633594846	0.889041128530946	no	CAMK2G	PREDICTED: calcium/calmodulin-dependent protein kinase type II subunit gamma-like [Sinocyclocheilus anshuiensis]	ko04020//Calcium signaling pathway//Signal transduction//Environmental Information Processing;ko04261//Adrenergic signaling in cardiomyocytes//Circulatory system//Organismal Systems;ko04310//Wnt signaling pathway//Signal transduction//Environmental Information Processing;ko04916//Melanogenesis//Endocrine system//Organismal Systems;ko04912//GnRH signaling pathway//Endocrine system//Organismal Syst…	-	-	-
Unigene0000925	14	9.66666666666667	0.9388	1.2217	1.2305	0.5741	0.7680	0.5908	1.13033333333333	0.6443	-0.810943783770202	0.200635693251685	0.927961989248299	no	-	--	-	-	-	-
Unigene0000926	20.6666666666667	16.3333333333333	1.0022	0.9936	1.5082	0.9988	0.2484	1.0278	1.168	0.758333333333333	-0.623136229627753	0.33568915140905	0.988364039424551	no	-	--	-	-	-	-
Unigene0000927	89.3333333333333	44.6666666666667	7.0053	6.1356	3.2371	2.3800	0.2505	3.6266	5.45933333333333	2.0857	-1.38819312672111	0.0474078233260429	0.699916879219058	no	-	--	-	-	-	-
Unigene0000928	165.666666666667	157	3.0939	4.8942	4.6790	2.7693	3.8494	3.3282	4.22236666666667	3.31563333333333	-0.348767394490144	0.394750478615137	1	no	-	--	-	-	-	-
Unigene0000929	14.3333333333333	17.6666666666667	0.6573	0.8146	0.5983	0.9677	0.4888	0.5745	0.690066666666667	0.677	-0.0275799121823194	1	1	no	-	--	-	-	-	-
Unigene0000930	2085.33333333333	2404	67.6552	67.2488	71.9774	66.7504	46.8203	79.8223	68.9604666666667	64.4643333333333	-0.0972683668795821	0.763342257772994	1	no	Ppp3r1	PREDICTED: calcineurin subunit B type 1-like [Sinocyclocheilus anshuiensis]	ko04010//MAPK signaling pathway//Signal transduction//Environmental Information Processing;ko04020//Calcium signaling pathway//Signal transduction//Environmental Information Processing;ko04310//Wnt signaling pathway//Signal transduction//Environmental Information Processing;ko04114//Oocyte meiosis//Cell growth and death//Cellular Processes;ko04210//Apoptosis//Cell growth and death//Cellular Proce…	GO:0044422//organelle part;GO:0043229//intracellular organelle;GO:0043226//organelle;GO:0044428//nuclear part;GO:0005737//cytoplasm;GO:0043233//organelle lumen;GO:0070013//intracellular organelle lumen;GO:0032991//macromolecular complex;GO:0044446//intracellular organelle part;GO:0031981//nuclear lumen;GO:0043234//protein complex;GO:0005634//nucleus;GO:0044464//cell part;GO:0043227//membrane-boun…	GO:0042578//phosphoric ester hydrolase activity;GO:0043169//cation binding;GO:0003824//catalytic activity;GO:0016791//phosphatase activity;GO:0016788//hydrolase activity, acting on ester bonds;GO:0004721//phosphoprotein phosphatase activity;GO:0005515//protein binding;GO:0043167//ion binding;GO:0046872//metal ion binding;GO:0004722//protein serine/threonine phosphatase activity;GO:0005488//bindin…	GO:0050896//response to stimulus;GO:0044267//cellular protein metabolic process;GO:0032502//developmental process;GO:0002768//immune response-regulating cell surface receptor signaling pathway;GO:0006952//defense response;GO:0050794//regulation of cellular process;GO:0006913//nucleocytoplasmic transport;GO:0010638//positive regulation of organelle organization;GO:0042991//transcription factor imp…
Unigene0000931	142.333333333333	45.6666666666667	1.2395	4.6892	2.1851	0.7979	0.8571	0.4562	2.7046	0.703733333333333	-1.94231448569215	0.000524150370686993	0.0920613649861109	no	LUM	zgc:86661, partial [Danio rerio]	-	-	-	GO:0009987//cellular process;GO:0009790//embryo development;GO:0007600//sensory perception;GO:0071840//cellular component organization or biogenesis;GO:0050877//neurological system process;GO:0050953//sensory perception of light stimulus;GO:0032502//developmental process;GO:0007275//multicellular organism development;GO:0048513//animal organ development;GO:0044767//single-organism developmental p…
Unigene0000932	23.3333333333333	31.3333333333333	1.7024	2.7427	2.3966	3.9330	2.2788	1.2697	2.28056666666667	2.49383333333333	0.128972706494192	0.851979587827503	1	no	-	--	-	-	-	-
Unigene0000933	9.33333333333333	7.33333333333333	0.4987	0.5478	0.1320	0.1540	0.2697	0.2853	0.392833333333333	0.236333333333333	-0.733094226010652	0.373794362409833	0.99848571189249	no	-	--	-	-	-	-
Unigene0000934	164	117.333333333333	1.7749	2.6097	1.8750	0.5634	1.9798	1.1393	2.08653333333333	1.2275	-0.765384943964796	0.121324678704087	0.854663605032819	no	TAGAP	PREDICTED: T-cell activation Rho GTPase-activating protein-like isoform X1 [Sinocyclocheilus grahami]	-	GO:0044464//cell part;GO:0005623//cell	-	-
Unigene0000935	76.3333333333333	117	1.8393	0.6007	0.9532	1.9591	0.8872	1.2166	1.13106666666667	1.3543	0.259863388970786	0.627279057581034	1	no	Ovos	PREDICTED: alpha-2-macroglobulin-like [Sinocyclocheilus grahami]	-	GO:0005576//extracellular region	-	-
Unigene0000936	10.3333333333333	5	1.0310	0.6161	0.4290	0.3002	0.0548	0.4120	0.692033333333333	0.255666666666667	-1.43657745316203	0.0892346191082598	0.807710261479168	no	-	--	-	-	-	-
Unigene0000937	369	453.666666666667	9.6352	8.5858	9.1683	10.6025	8.4758	8.1680	9.12976666666667	9.0821	-0.00755206722157944	0.985462558624306	1	no	ZBED9	PREDICTED: SCAN domain-containing protein 3-like [Sinocyclocheilus grahami]	-	-	-	-
Unigene0000938	133	88.3333333333333	3.3654	3.8968	2.7828	2.1123	1.9513	1.2763	3.34833333333333	1.77996666666667	-0.911592934059768	0.0354384750372088	0.645870518298517	no	-	--	-	-	-	-
Unigene0000939	25.3333333333333	38	0.9721	1.2321	0.7722	1.3211	1.4787	0.7724	0.992133333333333	1.19073333333333	0.263244432156346	0.619078105941515	1	no	-	--	-	-	-	-
Unigene0000940	184.666666666667	278	2.0931	6.0722	6.5120	6.4215	3.5376	8.5594	4.89243333333333	6.17283333333333	0.335380646957201	0.504345183889024	1	no	-	--	-	-	-	-
Unigene0000941	32	14	0.4992	1.5982	0.3231	0.3015	0.4125	0.1163	0.806833333333333	0.276766666666667	-1.54360049080403	0.0360147361830481	0.649545735450554	no	PRDM1	PREDICTED: PR domain zinc finger protein 1-like isoform X3 [Cyprinus carpio]	-	-	-	-
Unigene0000942	4.66666666666667	4	0.2680	0.0830	0.6504	0.2428	0.2657	0.2498	0.3338	0.252766666666667	-0.401177732504539	0.79993596606162	1	no	-	--	-	-	-	-
Unigene0000943	5	7.33333333333333	0.5240	0.0609	0.2861	0.2225	0.6819	0.1374	0.290333333333333	0.347266666666667	0.258333718264478	0.864658824552209	1	no	Dos	PREDICTED: voltage-dependent calcium channel beta subunit-associated regulatory protein-like [Sinocyclocheilus anshuiensis]	-	-	-	-
Unigene0000944	1166.66666666667	1368.66666666667	2.8511	3.2732	4.3525	2.7093	4.6131	3.0051	3.49226666666667	3.4425	-0.0207070718433099	0.953755760138538	1	no	NBEAL1	PREDICTED: neurobeachin-like protein 1 isoform X2 [Sinocyclocheilus grahami]	-	-	-	-
Unigene0000945	0.333333333333333	0.666666666666667	0.0000	0.1203	0.0000	0.0880	0.0000	0.0905	0.0401	0.0595	0.569287431740386	1	1	no	-	--	-	-	-	-
Unigene0000946	3520.66666666667	5984.33333333333	19.8693	20.5631	26.6340	29.5693	37.7949	27.4169	22.3554666666667	31.5937	0.49900924160185	0.108146822737113	0.833280796224676	no	Gpat2	glycerol-3-phosphate acyltransferase 2, mitochondrial [Danio rerio]	ko01100//Metabolic pathways//Global and Overview//Metabolism;ko01110//Biosynthesis of secondary metabolites//Global and Overview//Metabolism;ko00564//Glycerophospholipid metabolism//Lipid metabolism//Metabolism;ko00561//Glycerolipid metabolism//Lipid metabolism//Metabolism	-	GO:0016747//transferase activity, transferring acyl groups other than amino-acyl groups;GO:0016740//transferase activity;GO:0016746//transferase activity, transferring acyl groups;GO:0003824//catalytic activity	GO:0044699//single-organism process;GO:0008152//metabolic process;GO:0044238//primary metabolic process;GO:0044710//single-organism metabolic process;GO:0071704//organic substance metabolic process;GO:0006629//lipid metabolic process
Unigene0000947	3	2.66666666666667	0.1571	0.1460	0.1144	0.1067	0.1557	0.0366	0.139166666666667	0.0996666666666667	-0.481630713163313	0.716242898859728	1	no	-	--	-	-	-	-
Unigene0000948	2890.66666666667	3767	175.5871	175.6308	183.6270	249.9229	163.7904	150.7705	178.281633333333	188.161266666667	0.0778115938502865	0.808225228285279	1	no	-	--	-	-	-	-
Unigene0000949	34	23.3333333333333	1.6517	1.5847	1.5131	0.9051	0.5547	1.1549	1.58316666666667	0.871566666666667	-0.861130215784091	0.108270658772768	0.833365972478	no	MYH6	Myosin-7 [Larimichthys crocea]	ko04261//Adrenergic signaling in cardiomyocytes//Circulatory system//Organismal Systems;ko04530//Tight junction//Cellular commiunity//Cellular Processes;ko04260//Cardiac muscle contraction//Circulatory system//Organismal Systems	GO:0015629//actin cytoskeleton;GO:0043226//organelle;GO:0005622//intracellular;GO:0043228//non-membrane-bounded organelle;GO:0005856//cytoskeleton;GO:0005623//cell;GO:0043229//intracellular organelle;GO:0044464//cell part;GO:0043232//intracellular non-membrane-bounded organelle;GO:0044424//intracellular part	GO:1901363//heterocyclic compound binding;GO:0016817//hydrolase activity, acting on acid anhydrides;GO:0016787//hydrolase activity;GO:0032549//ribonucleoside binding;GO:0097367//carbohydrate derivative binding;GO:0017111//nucleoside-triphosphatase activity;GO:0016818//hydrolase activity, acting on acid anhydrides, in phosphorus-containing anhydrides;GO:0005515//protein binding;GO:0003824//catalyt…	GO:0032502//developmental process;GO:0048856//anatomical structure development;GO:0044699//single-organism process;GO:0009790//embryo development;GO:0032501//multicellular organismal process;GO:0007275//multicellular organism development;GO:0044707//single-multicellular organism process;GO:0044767//single-organism developmental process
Unigene0000950	44	24.3333333333333	2.0647	2.0175	2.0045	1.2950	0.7874	0.6293	2.0289	0.9039	-1.16646268082845	0.0261233275812504	0.58457288285598	no	ZNF502	PREDICTED: gastrula zinc finger protein XlCGF26.1-like isoform X2 [Sinocyclocheilus anshuiensis]	-	-	-	-
Unigene0000951	35.3333333333333	45.6666666666667	1.3244	0.3637	1.0740	0.8795	0.9849	1.0523	0.9207	0.972233333333333	0.0785714517135703	0.895594249319399	1	no	-	--	-	-	-	-
Unigene0000952	181	188	10.6342	7.1647	8.8905	7.2639	8.8288	6.4128	8.89646666666667	7.50183333333333	-0.245989255720771	0.541380396811088	1	no	-	--	-	-	-	-
Unigene0000953	22	24	1.4361	1.5402	3.0567	1.8765	2.2181	1.5448	2.011	1.8798	-0.0973339061005044	0.879465028075269	1	no	-	--	-	-	-	-
Unigene0000954	105.333333333333	76.3333333333333	3.4568	4.2258	2.8181	1.4553	2.4869	2.1806	3.50023333333333	2.04093333333333	-0.778222040717016	0.0853088059029563	0.80015167191132	no	-	--	-	-	-	-
Unigene0000955	86	118.666666666667	2.1620	1.8947	2.7437	2.4554	3.4223	1.9436	2.2668	2.6071	0.201788813532494	0.662215335585108	1	no	-	--	-	-	-	-
Unigene0000956	10	7.66666666666667	0.9469	0.1600	1.0655	0.3509	0.4481	0.6019	0.724133333333333	0.466966666666667	-0.632935792372713	0.475120009875967	1	no	-	--	-	-	-	-
Unigene0000957	5663	7528.66666666667	125.2623	108.6647	126.6679	146.9757	115.2115	127.2518	120.1983	129.813	0.11101837616896	0.709092004081506	1	no	mtpn	myotrophin [Danio rerio]	-	GO:0043232//intracellular non-membrane-bounded organelle;GO:0015629//actin cytoskeleton;GO:0043227//membrane-bounded organelle;GO:0005856//cytoskeleton;GO:0043005//neuron projection;GO:0043228//non-membrane-bounded organelle;GO:0043229//intracellular organelle;GO:0044444//cytoplasmic part;GO:0005622//intracellular;GO:0005623//cell;GO:0044424//intracellular part;GO:0044464//cell part;GO:0097458//n…	-	GO:0014896//muscle hypertrophy;GO:0051252//regulation of RNA metabolic process;GO:0065007//biological regulation;GO:0014897//striated muscle hypertrophy;GO:0003300//cardiac muscle hypertrophy;GO:0051171//regulation of nitrogen compound metabolic process;GO:0010604//positive regulation of macromolecule metabolic process;GO:0080090//regulation of primary metabolic process;GO:1903508//positive regul…
Unigene0000958	100.333333333333	96.6666666666667	2.1671	2.2043	1.1761	1.6948	0.4561	1.9727	1.84916666666667	1.37453333333333	-0.427933368126671	0.44318595509153	1	no	-	--	-	-	-	-
Unigene0000959	16.3333333333333	20.6666666666667	0.4751	0.4416	1.4271	1.3317	0.4858	0.7475	0.781266666666667	0.855	0.130109358170531	0.870006744402477	1	no	-	--	-	-	-	-
Unigene0000960	23.6666666666667	20.3333333333333	1.1697	3.2615	3.3122	1.2363	2.9961	1.4540	2.58113333333333	1.89546666666667	-0.445451582744847	0.475444365612175	1	no	-	--	-	-	-	-
Unigene0000961	15.3333333333333	32.6666666666667	0.0562	0.8099	0.2661	0.3056	0.9825	0.6879	0.3774	0.658666666666667	0.803454118150439	0.306814071430336	0.981120102391214	no	foxa1	hepatocyte nuclear factor 3-alpha [Danio rerio]	-	-	-	-
Unigene0000962	81.3333333333333	33.3333333333333	17.9348	7.7310	3.9746	0.4415	0.3866	8.2694	9.88013333333333	3.0325	-1.7040228659015	0.0724962770201398	0.777043461316106	no	IGKV4-1	PREDICTED: polymeric immunoglobulin receptor-like [Sinocyclocheilus anshuiensis]	-	GO:0016020//membrane;GO:0031224//intrinsic component of membrane;GO:0044425//membrane part	-	-
Unigene0000963	49.6666666666667	29.6666666666667	1.3455	1.0875	1.3418	0.2186	0.3045	1.3090	1.25826666666667	0.6107	-1.04290195722359	0.108942052802979	0.834673629075445	no	-	PREDICTED: uncharacterized protein LOC108257802 isoform X2 [Ictalurus punctatus]	-	-	-	-
Unigene0000964	46.6666666666667	64	9.1817	3.8671	4.9099	6.4338	2.6672	10.1317	5.98623333333333	6.4109	0.0988783913465899	0.879242416307487	1	no	-	--	-	-	-	-
Unigene0000965	1375.33333333333	1760.66666666667	24.6790	29.2521	29.7279	33.0746	34.7131	20.1321	27.8863333333333	29.3066	0.0716673513097828	0.833350688073176	1	no	TIA1	TIA1 cytotoxic granule-associated RNA binding protein 1 [Danio rerio]	-	-	GO:0005488//binding;GO:0097159//organic cyclic compound binding	-
Unigene0000966	43.3333333333333	39.6666666666667	2.5075	1.0099	1.3389	0.7951	1.1810	1.5487	1.61876666666667	1.17493333333333	-0.462316147295448	0.408770483284537	1	no	-	--	-	-	-	-
Unigene0000967	57.3333333333333	52.6666666666667	8.4528	5.6119	6.2527	5.2877	4.0909	5.5351	6.77246666666667	4.97123333333333	-0.446077567431694	0.350687430925143	0.991184679460046	no	-	--	-	-	-	-
Unigene0000968	193	251.333333333333	10.8495	8.6175	13.0712	12.4654	13.3495	9.2874	10.8460666666667	11.7007666666667	0.109431119090593	0.782494131283892	1	no	-	--	-	-	-	-
Unigene0000969	3672	5466	105.3426	101.1656	113.9201	157.7188	125.5782	105.3937	106.809433333333	129.563566666667	0.278621018301395	0.364231297382095	0.995472272498554	no	tma7	PREDICTED: translation machinery-associated protein 7 [Cyprinodon variegatus]	-	-	-	-
Unigene0000970	33.3333333333333	31.6666666666667	2.6427	1.4605	2.1323	1.7471	1.2748	1.7479	2.0785	1.58993333333333	-0.386576474078943	0.470664007724722	1	no	-	--	-	-	-	-
Unigene0000971	27.6666666666667	31	1.2779	0.9898	0.8685	0.8104	1.2988	0.7148	1.0454	0.941333333333333	-0.151277476522507	0.804113992861171	1	no	-	--	-	-	-	-
Unigene0000972	1389.33333333333	1405.66666666667	18.8876	16.4152	19.3559	17.5473	13.2575	14.1386	18.2195666666667	14.9811333333333	-0.282341877730219	0.378813208504385	1	no	ZNF180	PREDICTED: zinc finger and SCAN domain-containing protein 5A-like isoform X1 [Sinocyclocheilus anshuiensis]	-	-	-	-
Unigene0000973	22081.3333333333	31796	1231.9448	1214.3518	1619.2160	1715.1926	1675.6632	1454.1879	1355.17086666667	1615.01456666667	0.253072412207537	0.397405479255351	1	no	rpl35	PREDICTED: 60S ribosomal protein L35 isoform X1 [Cyprinus carpio]	ko03010//Ribosome//Translation//Genetic Information Processing	GO:0032991//macromolecular complex;GO:1990904//ribonucleoprotein complex;GO:0005622//intracellular;GO:0044464//cell part;GO:0030529//intracellular ribonucleoprotein complex;GO:0044424//intracellular part;GO:0005623//cell	-	GO:0043170//macromolecule metabolic process;GO:0007275//multicellular organism development;GO:0032502//developmental process;GO:0044707//single-multicellular organism process;GO:0009987//cellular process;GO:0008152//metabolic process;GO:0010467//gene expression;GO:0044767//single-organism developmental process;GO:0007049//cell cycle;GO:0071704//organic substance metabolic process;GO:0032501//mult…
Unigene0000974	9.66666666666667	7	0.7127	0.6624	0.8433	0.4237	0.3313	0.5606	0.739466666666667	0.438533333333333	-0.753798608204078	0.297879150268293	0.978357687442323	no	-	--	-	-	-	-
Unigene0000975	11.6666666666667	10.6666666666667	0.8378	1.4709	0.6101	1.0121	0.4846	0.5858	0.972933333333333	0.694166666666667	-0.487058863281735	0.480578629431548	1	no	-	--	-	-	-	-
Unigene0000976	3132.66666666667	3429.33333333333	9.1410	9.7111	12.1191	8.0344	11.2389	8.8986	10.3237333333333	9.39063333333333	-0.136670415480143	0.661848838428296	1	no	Ubr3	PREDICTED: E3 ubiquitin-protein ligase UBR3-like isoform X2 [Sinocyclocheilus anshuiensis]	-	-	GO:0043169//cation binding;GO:0046914//transition metal ion binding;GO:0046872//metal ion binding;GO:0043167//ion binding;GO:0005488//binding	GO:0044260//cellular macromolecule metabolic process;GO:0008152//metabolic process;GO:0043170//macromolecule metabolic process;GO:0032446//protein modification by small protein conjugation;GO:0009987//cellular process;GO:0019538//protein metabolic process;GO:0070647//protein modification by small protein conjugation or removal;GO:0044237//cellular metabolic process;GO:0006464//cellular protein mo…
Unigene0000977	534.666666666667	688	5.5625	4.7757	5.2541	5.8971	6.3627	4.0691	5.19743333333333	5.44296666666667	0.0665938528870796	0.850693844374645	1	no	Srm	spermidine synthase [Danio rerio]	ko01100//Metabolic pathways//Global and Overview//Metabolism;ko00480//Glutathione metabolism//Metabolism of other amino acids//Metabolism;ko00330//Arginine and proline metabolism//Amino acid metabolism//Metabolism;ko00270//Cysteine and methionine metabolism//Amino acid metabolism//Metabolism;ko00410//beta-Alanine metabolism//Metabolism of other amino acids//Metabolism	-	GO:0003824//catalytic activity	-
Unigene0000978	26	21.3333333333333	1.4062	0.4945	0.7472	0.7231	0.4239	0.5581	0.882633333333333	0.568366666666667	-0.634992286362165	0.30124753789225	0.97967753014196	no	-	--	-	-	-	-
Unigene0000979	1667.66666666667	1793.33333333333	29.1261	34.6173	32.9169	24.0639	30.9973	29.9870	32.2201	28.3494	-0.184642770059755	0.557112230140879	1	no	PTTG1IP	PREDICTED: pituitary tumor-transforming gene 1 protein-interacting protein-like [Sinocyclocheilus anshuiensis]	-	-	-	-
Unigene0000980	18	9.66666666666667	1.1662	1.3550	1.9107	0.8585	0.7950	0.3398	1.4773	0.664433333333333	-1.15276647107107	0.0772546606741378	0.788142198413434	no	-	--	-	-	-	-
Unigene0000981	7.66666666666667	9	0.3573	0.2906	0.2602	0.3945	0.1329	0.3123	0.3027	0.2799	-0.112977188254599	0.934006343189565	1	no	-	PREDICTED: pleckstrin homology domain-containing family S member 1-like [Sinocyclocheilus grahami]	-	-	-	-
Unigene0000982	234.666666666667	280	9.2631	9.0278	9.2335	6.8135	12.1053	8.0176	9.1748	8.9788	-0.0311540648917097	0.938200426467928	1	no	-	--	-	-	-	-
Unigene0000983	154	125	3.0588	2.4447	2.4117	1.1252	2.2747	1.8118	2.6384	1.73723333333333	-0.602871763866763	0.162682867742086	0.898730181562041	no	-	--	-	-	-	-
Unigene0000984	6	12.3333333333333	0.9503	0.8832	0.1730	1.2914	0.2650	1.4950	0.668833333333333	1.01713333333333	0.604790155293538	0.474041254860241	1	no	-	--	-	-	-	-
Unigene0000985	199.666666666667	245.333333333333	1.8687	2.1802	1.1765	1.7195	2.0628	1.2998	1.7418	1.69403333333333	-0.0401167150753887	0.929054542983842	1	no	c3	PREDICTED: complement C3-like [Sinocyclocheilus rhinocerous]	ko04145//Phagosome//Transport and catabolism//Cellular Processes	-	-	GO:0019538//protein metabolic process;GO:0050789//regulation of biological process;GO:0065007//biological regulation;GO:0050896//response to stimulus;GO:0006955//immune response;GO:0044238//primary metabolic process;GO:0006950//response to stress;GO:0008152//metabolic process;GO:0006952//defense response;GO:0043170//macromolecule metabolic process;GO:0002376//immune system process;GO:0071704//org…
Unigene0000986	40	17.6666666666667	4.3662	1.3306	2.0327	1.3618	0.7984	0.5005	2.5765	0.8869	-1.53856924084198	0.0163436271269204	0.492731548093335	no	-	--	-	-	-	-
Unigene0000987	82.3333333333333	65.6666666666667	2.2596	1.8960	2.5137	2.7295	0.7935	0.7680	2.2231	1.43033333333333	-0.636221445102444	0.259125223480579	0.96039508244514	no	-	PREDICTED: uncharacterized protein LOC109045355 [Cyprinus carpio]	-	-	-	-
Unigene0000988	215.333333333333	324.333333333333	2.4538	1.3382	1.4242	1.6120	2.2692	2.3679	1.73873333333333	2.08303333333333	0.260649240159683	0.521103465409351	1	no	Rasl10b	PREDICTED: ras-like protein family member 10B [Cyprinus carpio]	-	-	GO:0032550//purine ribonucleoside binding;GO:0032549//ribonucleoside binding;GO:0001882//nucleoside binding;GO:1901363//heterocyclic compound binding;GO:0097159//organic cyclic compound binding;GO:0001883//purine nucleoside binding;GO:0097367//carbohydrate derivative binding;GO:0036094//small molecule binding;GO:0005488//binding	GO:0009154//purine ribonucleotide catabolic process;GO:0050794//regulation of cellular process;GO:0044281//small molecule metabolic process;GO:0072521//purine-containing compound metabolic process;GO:0007154//cell communication;GO:0046700//heterocycle catabolic process;GO:0051716//cellular response to stimulus;GO:1901575//organic substance catabolic process;GO:0007165//signal transduction;GO:0009…
Unigene0000989	16	11	1.5102	1.0918	0.9775	0.5701	1.1231	0.2933	1.19316666666667	0.662166666666667	-0.849529286270628	0.216592248505561	0.937279921390507	no	tc1a	PREDICTED: forkhead box protein N1 isoform X1 [Oreochromis niloticus]	-	-	GO:0016757//transferase activity, transferring glycosyl groups;GO:0003824//catalytic activity;GO:0016740//transferase activity	-
Unigene0000990	8.66666666666667	8	0.9634	0.8954	0.4209	0.4582	0.4299	0.7410	0.7599	0.543033333333333	-0.484768819228669	0.511875633469796	1	no	-	putative nuclease HARBI1, partial [Larimichthys crocea]	-	-	-	-
Unigene0000991	46	51.6666666666667	1.6304	0.9554	1.6260	1.3728	1.2125	1.2887	1.40393333333333	1.29133333333333	-0.120612976757981	0.819508838666378	1	no	-	putative nuclease HARBI1, partial [Larimichthys crocea]	-	-	-	-
Unigene0000992	19.3333333333333	11.6666666666667	2.2828	0.2927	1.4330	0.2674	0.5854	1.1008	1.33616666666667	0.6512	-1.03692736879626	0.192537602176868	0.922288211555445	no	-	--	-	-	-	-
Unigene0000993	14	13.6666666666667	0.6712	1.4817	0.9164	0.5131	0.6239	1.2906	1.0231	0.8092	-0.338378939090295	0.666653014865042	1	no	-	--	-	-	-	-
Unigene0000994	335	484.666666666667	13.0965	18.1939	10.5618	19.6157	17.2098	11.3565	13.9507333333333	16.0606666666667	0.203190818666077	0.600507938943941	1	no	Tuba1a	PREDICTED: tubulin alpha-1 chain-like [Astyanax mexicanus]	ko04145//Phagosome//Transport and catabolism//Cellular Processes;ko04540//Gap junction//Cellular commiunity//Cellular Processes	GO:0043227//membrane-bounded organelle;GO:0043229//intracellular organelle;GO:0043232//intracellular non-membrane-bounded organelle;GO:0044446//intracellular organelle part;GO:0005856//cytoskeleton;GO:0005737//cytoplasm;GO:0044422//organelle part;GO:0043228//non-membrane-bounded organelle;GO:0099513//polymeric cytoskeletal fiber;GO:0099512//supramolecular fiber;GO:0005622//intracellular;GO:004446…	GO:0005515//protein binding;GO:0005198//structural molecule activity;GO:0001882//nucleoside binding;GO:0097367//carbohydrate derivative binding;GO:0016818//hydrolase activity, acting on acid anhydrides, in phosphorus-containing anhydrides;GO:0016787//hydrolase activity;GO:0003824//catalytic activity;GO:0001883//purine nucleoside binding;GO:0016462//pyrophosphatase activity;GO:0097159//organic cyc…	GO:0044710//single-organism metabolic process;GO:0009056//catabolic process;GO:0044712//single-organism catabolic process;GO:0032502//developmental process;GO:0043623//cellular protein complex assembly;GO:0034097//response to cytokine;GO:0044772//mitotic cell cycle phase transition;GO:1901565//organonitrogen compound catabolic process;GO:1901292//nucleoside phosphate catabolic process;GO:0051649/…
Unigene0000995	734	941	15.7161	13.1664	20.3807	20.4824	14.1109	17.5310	16.4210666666667	17.3747666666667	0.0814457597807025	0.81754537855614	1	no	POLR3GL	PREDICTED: DNA-directed RNA polymerase III subunit RPC7-like isoform X1 [Sinocyclocheilus grahami]	ko01100//Metabolic pathways//Global and Overview//Metabolism;ko00230//Purine metabolism//Nucleotide metabolism//Metabolism;ko00240//Pyrimidine metabolism//Nucleotide metabolism//Metabolism;ko04623//Cytosolic DNA-sensing pathway//Immune system//Organismal Systems;ko03020//RNA polymerase//Transcription//Genetic Information Processing	-	-	-
Unigene0000996	35.3333333333333	30.6666666666667	2.8460	1.8223	1.3816	0.8165	1.0818	2.2111	2.01663333333333	1.3698	-0.557983529873564	0.336114578321774	0.988364039424551	no	-	--	-	-	-	-
Unigene0000997	288	290.666666666667	3.3081	4.2744	3.5754	3.0743	3.1772	2.8940	3.7193	3.0485	-0.286931574920444	0.428352565774208	1	no	mul1a	LOC402879 protein, partial [Danio rerio]	-	-	-	GO:0008152//metabolic process;GO:0036211//protein modification process;GO:0071840//cellular component organization or biogenesis;GO:0006996//organelle organization;GO:0019538//protein metabolic process;GO:0044238//primary metabolic process;GO:0016043//cellular component organization;GO:0044260//cellular macromolecule metabolic process;GO:0043412//macromolecule modification;GO:0043170//macromolecu…
Unigene0000998	2410	2704	81.6638	63.8442	66.5746	76.1665	46.7539	67.3429	70.6942	63.4211	-0.156628955813561	0.627815524305805	1	no	-	PREDICTED: small kinetochore-associated protein-like [Sinocyclocheilus grahami]	-	-	-	-
Unigene0000999	29.6666666666667	26	1.2337	1.5421	0.6505	0.5781	1.1073	0.6842	1.1421	0.789866666666667	-0.532007930715726	0.368404116559692	0.996539407333036	no	-	--	-	-	-	-
Unigene0001000	189.333333333333	279	17.8245	19.8809	26.0543	25.5685	34.5623	18.4641	21.2532333333333	26.1983	0.301790858239139	0.459056694450253	1	no	-	--	-	-	-	-
Unigene0001001	50	43	0.9294	0.9903	1.0234	0.5391	0.5057	1.0144	0.981033333333333	0.6864	-0.515252604012452	0.305959343698932	0.980949605859751	no	KCTD16	PREDICTED: BTB/POZ domain-containing protein KCTD16-like [Cyprinus carpio]	-	-	-	GO:1902578//single-organism localization;GO:0044765//single-organism transport;GO:0044699//single-organism process;GO:0051234//establishment of localization;GO:0006810//transport;GO:0051179//localization
Unigene0001002	329.666666666667	399.333333333333	16.5245	21.8931	36.5628	29.5280	21.8616	25.5344	24.9934666666667	25.6413333333333	0.0369202618388406	0.93102188116168	1	no	-	PREDICTED: uncharacterized protein LOC109096714 isoform X3 [Cyprinus carpio]	-	-	-	-
Unigene0001003	11.6666666666667	12.6666666666667	0.4850	0.6010	1.2360	1.1534	0.4208	0.5652	0.774	0.713133333333333	-0.118161726229115	0.905913730831716	1	no	-	PREDICTED: uncharacterized protein LOC109096714 isoform X4 [Cyprinus carpio]	-	-	-	-
Unigene0001004	39.3333333333333	27.6666666666667	1.2061	1.7059	2.2910	0.4276	2.1448	0.5866	1.73433333333333	1.053	-0.719875770229817	0.267871296614098	0.966648613523428	no	-	--	-	-	-	-
Unigene0001005	27.3333333333333	32.3333333333333	1.6285	1.3623	2.6088	1.7151	2.0588	1.8219	1.86653333333333	1.86526666666667	-0.000979373915337577	1	1	no	-	--	-	-	-	-
Unigene0001006	32	33.3333333333333	3.1963	1.7200	2.2049	2.0575	2.3144	1.5880	2.37373333333333	1.98663333333333	-0.256832247361594	0.648235621695412	1	no	-	--	-	-	-	-
Unigene0001007	167.333333333333	192	1.7522	1.7954	2.3609	1.6125	2.6779	1.3795	1.9695	1.88996666666667	-0.0594686270869674	0.887609171440879	1	no	GABRD	PREDICTED: gamma-aminobutyric acid receptor subunit delta-like [Sinocyclocheilus anshuiensis]	ko04080//Neuroactive ligand-receptor interaction//Signaling molecules and interaction//Environmental Information Processing	GO:0016020//membrane;GO:0044425//membrane part;GO:0031224//intrinsic component of membrane	GO:0004872//receptor activity;GO:0022891//substrate-specific transmembrane transporter activity;GO:0005215//transporter activity;GO:0022892//substrate-specific transporter activity;GO:0060089//molecular transducer activity;GO:0015267//channel activity;GO:0022803//passive transmembrane transporter activity;GO:0099600//transmembrane receptor activity;GO:0022836//gated channel activity;GO:0022834//l…	GO:0006810//transport;GO:0051179//localization;GO:0006811//ion transport;GO:0009987//cellular process;GO:0044699//single-organism process;GO:0007154//cell communication;GO:0044765//single-organism transport;GO:1902578//single-organism localization;GO:0044763//single-organism cellular process;GO:0051234//establishment of localization
Unigene0001008	10.3333333333333	23.6666666666667	0.4355	0.2208	0.4036	0.7533	0.8245	0.4153	0.3533	0.664366666666667	0.911085941409045	0.147273530587713	0.882487762127555	no	-	--	-	-	-	-
Unigene0001009	1916.66666666667	1999.66666666667	9.0587	7.7518	8.2280	7.1963	6.8777	7.0634	8.34616666666667	7.0458	-0.244350206924787	0.421912451982162	1	no	XYLT2	PREDICTED: xylosyltransferase 2-like [Sinocyclocheilus anshuiensis]	ko01100//Metabolic pathways//Global and Overview//Metabolism;ko00534//Glycosaminoglycan biosynthesis - heparan sulfate / heparin//Glycan biosynthesis and metabolism//Metabolism;ko00532//Glycosaminoglycan biosynthesis - chondroitin sulfate / dermatan sulfate//Glycan biosynthesis and metabolism//Metabolism	-	GO:0003824//catalytic activity;GO:0008194//UDP-glycosyltransferase activity;GO:0016740//transferase activity;GO:0016757//transferase activity, transferring glycosyl groups	GO:0006022//aminoglycan metabolic process;GO:0006807//nitrogen compound metabolic process;GO:0044711//single-organism biosynthetic process;GO:0009058//biosynthetic process;GO:0043170//macromolecule metabolic process;GO:1901566//organonitrogen compound biosynthetic process;GO:0044710//single-organism metabolic process;GO:0008152//metabolic process;GO:1901576//organic substance biosynthetic process…
Unigene0001010	1421	1153.33333333333	17.0548	12.4812	11.6097	5.8090	8.5606	12.3211	13.7152333333333	8.8969	-0.624404524652725	0.0908101654534334	0.811707707600738	no	-	PREDICTED: uncharacterized protein LOC101882312 [Danio rerio]	-	-	-	-
Unigene0001011	18.6666666666667	26.3333333333333	1.0731	0.7627	1.1951	0.9436	1.1266	1.4566	1.0103	1.1756	0.218613511474813	0.716265068344805	1	no	-	--	-	-	-	-
Unigene0001012	207.666666666667	301.333333333333	6.2687	8.1276	7.1813	9.9840	9.1752	6.3375	7.19253333333333	8.4989	0.240776125399952	0.532501273855287	1	no	lipB	hypothetical protein cypCar_00048681 [Cyprinus carpio]	ko01100//Metabolic pathways//Global and Overview//Metabolism;ko00785//Lipoic acid metabolism//Metabolism of cofactors and vitamins//Metabolism	GO:0043229//intracellular organelle;GO:0005623//cell;GO:0044464//cell part;GO:0043231//intracellular membrane-bounded organelle;GO:0043227//membrane-bounded organelle;GO:0043226//organelle;GO:0044424//intracellular part;GO:0005622//intracellular	GO:0016746//transferase activity, transferring acyl groups;GO:0016747//transferase activity, transferring acyl groups other than amino-acyl groups;GO:0003824//catalytic activity;GO:0016740//transferase activity	GO:0044237//cellular metabolic process;GO:0006633//fatty acid biosynthetic process;GO:0044249//cellular biosynthetic process;GO:0006082//organic acid metabolic process;GO:0008610//lipid biosynthetic process;GO:0044699//single-organism process;GO:1901576//organic substance biosynthetic process;GO:0072330//monocarboxylic acid biosynthetic process;GO:0008152//metabolic process;GO:0071704//organic su…
Unigene0001013	0	0.666666666666667	0.0000	0.0000	0.0000	0.0816	0.0893	0.0000	0.001	0.0569666666666667	5.83204608606762	0.538979444889671	1	no	-	--	-	-	-	-
Unigene0001014	509	397.333333333333	5.6028	4.8900	3.6046	2.9133	3.6352	2.2159	4.69913333333333	2.92146666666667	-0.685701874863589	0.065022832563148	0.760561815065005	no	Phactr2	PREDICTED: phosphatase and actin regulator 2 isoform X3 [Sinocyclocheilus rhinocerous]	-	-	-	-
Unigene0001015	6.66666666666667	9.66666666666667	0.2187	1.4232	0.3186	0.5202	0.4880	1.2236	0.6535	0.743933333333333	0.186986105771233	0.888448247258781	1	no	Tf2-9	Pol polyprotein [Dicentrarchus labrax]	ko03013//RNA transport//Translation//Genetic Information Processing	-	-	-
Unigene0001016	1456	1411.66666666667	9.7141	7.9120	11.2299	5.8886	8.5989	8.6668	9.61866666666667	7.7181	-0.317591186044017	0.343617133994633	0.988586336099356	no	Tf2-9	PREDICTED: LOW QUALITY PROTEIN: retrotransposon-like protein 1 [Maylandia zebra]	-	-	-	-
Unigene0001017	7.66666666666667	9.33333333333333	1.2106	1.1252	0.7713	0.8226	1.2379	0.9523	1.0357	1.00426666666667	-0.0444637693471599	0.999999999999999	1	no	Tf2-9	PREDICTED: RNA-directed DNA polymerase homolog, partial [Danio rerio]	-	-	-	-
Unigene0001018	189.333333333333	198.333333333333	1.6908	1.9674	2.4077	1.1574	1.9001	2.2332	2.02196666666667	1.76356666666667	-0.197263099929519	0.636871436778302	1	no	Tf2-6	Pol polyprotein [Dicentrarchus labrax]	-	-	-	-
Unigene0001019	132.333333333333	147	3.0970	2.6633	4.0254	3.2450	4.0035	1.8214	3.2619	3.0233	-0.109588410340905	0.813422882617461	1	no	Tf2-6	Retrotransposable element Tf2 protein type 1 [Larimichthys crocea]	-	-	-	-
Unigene0001020	0.666666666666667	0.666666666666667	0.0000	0.0000	0.2287	0.1067	0.1168	0.0000	0.0762333333333333	0.0745	-0.0331815343409921	1	1	no	-	--	-	-	-	-
Unigene0001021	281.333333333333	302.666666666667	2.5522	2.8561	3.7076	2.8816	3.3899	1.9088	3.03863333333333	2.72676666666667	-0.156231345777742	0.691177242148565	1	no	PEG10	Pol polyprotein [Dicentrarchus labrax]	-	-	-	-
Unigene0001022	4.33333333333333	5.66666666666667	0.7566	0.4220	0.5509	0.6169	1.1254	0.1058	0.5765	0.616033333333333	0.0956878088444457	1	1	no	-	PREDICTED: copine-8-like [Sinocyclocheilus rhinocerous]	-	-	-	-
Unigene0001023	26.3333333333333	28.3333333333333	1.7478	1.9369	1.0769	1.3246	1.1498	1.5511	1.5872	1.34183333333333	-0.24227844268662	0.66649171937989	1	no	Tf2-8	Retrotransposable element Tf2 protein type 1 [Larimichthys crocea]	-	-	-	-
Unigene0001024	79.3333333333333	59.6666666666667	1.6074	1.4720	1.7729	1.2849	0.6680	1.0082	1.61743333333333	0.987033333333333	-0.712535536855478	0.128884067818779	0.861145498738641	no	Tf2-9	Retrotransposable element Tf2 protein type 1 [Larimichthys crocea]	ko03013//RNA transport//Translation//Genetic Information Processing	-	-	-
Unigene0001025	2857	3083	28.0333	29.4518	34.0664	25.4058	29.1270	26.8304	30.5171666666667	27.1210666666667	-0.170207102403168	0.571470720107063	1	no	-	PREDICTED: FHA domain-containing protein FhaA-like [Sinocyclocheilus grahami]	-	GO:0016020//membrane	-	GO:0022607//cellular component assembly;GO:0009966//regulation of signal transduction;GO:0048583//regulation of response to stimulus;GO:0007275//multicellular organism development;GO:0065007//biological regulation;GO:0048513//animal organ development;GO:0098609//cell-cell adhesion;GO:0070271//protein complex biogenesis;GO:0022037//metencephalon development;GO:0006461//protein complex assembly;GO:…
Unigene0001026	4	4.33333333333333	0.1744	0.6485	0.1270	0.1185	0.7134	0.0000	0.316633333333333	0.2773	-0.191365525715822	0.924881086207572	1	no	-	--	-	-	-	-
Unigene0001027	24.3333333333333	44.3333333333333	0.2929	0.9334	1.2797	1.7344	1.8359	0.3804	0.835333333333333	1.3169	0.656721883454164	0.344650711692957	0.989307031935262	no	-	--	-	-	-	-
Unigene0001028	8.66666666666667	5.33333333333333	0.1957	0.1092	0.1425	0.1862	0.0000	0.0274	0.149133333333333	0.0712	-1.06665360937156	0.316886972475132	0.983201741162226	no	-	PREDICTED: uncharacterized protein LOC109083040 [Cyprinus carpio]	-	-	-	-
Unigene0001029	2.33333333333333	2	0.4304	0.4000	0.1045	0.0975	0.3201	0.2006	0.311633333333333	0.206066666666667	-0.596738403617411	0.675911405838713	1	no	-	--	-	-	-	-
Unigene0001030	7	10	0.1992	0.3704	0.0725	0.0903	0.3457	0.2786	0.214033333333333	0.2382	0.154337915221537	0.887312932914877	1	no	SYT14	PREDICTED: synaptotagmin-14-like [Sinocyclocheilus grahami]	-	-	-	-
Unigene0001031	2.66666666666667	8.33333333333333	0.1090	0.2027	0.0794	0.5185	0.2027	0.2287	0.130366666666667	0.316633333333333	1.28023810674351	0.166427352977476	0.902412450114602	no	-	--	-	-	-	-
Unigene0001032	4703	6784	79.6188	88.3437	94.1880	122.8984	98.1804	87.8536	87.3835	102.977466666667	0.236895887368632	0.434387680293718	1	no	txn	PREDICTED: thioredoxin-like [Sinocyclocheilus anshuiensis]	-	-	GO:0003824//catalytic activity;GO:0016491//oxidoreductase activity;GO:0015036//disulfide oxidoreductase activity;GO:0016667//oxidoreductase activity, acting on a sulfur group of donors	GO:0044281//small molecule metabolic process;GO:0009987//cellular process;GO:0018904//ether metabolic process;GO:0042592//homeostatic process;GO:0065007//biological regulation;GO:0044763//single-organism cellular process;GO:0019725//cellular homeostasis;GO:0008152//metabolic process;GO:0044699//single-organism process;GO:0044710//single-organism metabolic process;GO:0065008//regulation of biologi…
Unigene0001033	14.6666666666667	16	0.4419	0.5371	0.3465	0.2310	0.4044	0.5229	0.441833333333333	0.3861	-0.194527710091606	0.793893247616485	1	no	-	--	-	-	-	-
Unigene0001034	21	18.3333333333333	0.4703	0.7398	0.7376	0.3687	0.2691	0.7589	0.649233333333333	0.465566666666667	-0.479749304693837	0.457034716203413	1	no	-	--	-	-	-	-
Unigene0001035	164	165	1.2898	1.2427	0.9048	0.6092	1.1814	0.9843	1.14576666666667	0.924966666666667	-0.308839990946657	0.472994272241845	1	no	Tf2-9	Pol polyprotein [Dicentrarchus labrax]	-	-	-	-
Unigene0001036	63.3333333333333	58.3333333333333	1.0531	1.4579	1.1911	1.1114	0.9665	0.6894	1.23403333333333	0.922433333333333	-0.419864811939635	0.374487939769038	0.998862786066019	no	CALB1	PREDICTED: calbindin-like [Sinocyclocheilus anshuiensis]	-	-	-	-
Unigene0001037	2250.33333333333	2344.33333333333	16.2305	13.1514	13.4023	12.7076	8.6360	14.3401	14.2614	11.8945666666667	-0.261812900284437	0.420155827919616	1	no	cep162	PREDICTED: centrosomal protein of 162 kDa isoform X2 [Sinocyclocheilus rhinocerous]	-	-	-	-
Unigene0001038	10.3333333333333	13	0.1688	1.0982	0.2868	0.8411	0.3766	0.3147	0.517933333333333	0.5108	-0.0200078858845281	1	1	no	-	PREDICTED: uncharacterized protein LOC107676182 [Sinocyclocheilus anshuiensis]	-	-	-	-
Unigene0001039	122.666666666667	120.666666666667	5.4554	3.0700	3.5670	2.4964	2.7874	4.2037	4.0308	3.1625	-0.350000721599258	0.434026877616251	1	no	CEP128	PREDICTED: centrosomal protein of 128 kDa-like [Sinocyclocheilus rhinocerous]	-	-	-	-
Unigene0001040	3.33333333333333	1.66666666666667	0.0000	0.2023	0.2377	0.0370	0.1619	0.0000	0.146666666666667	0.0663	-1.14546024757828	0.542532936753093	1	no	-	--	-	-	-	-
Unigene0001041	26.3333333333333	31.3333333333333	3.1989	2.7354	2.8883	2.3475	1.9031	4.2050	2.94086666666667	2.81853333333333	-0.0612967470560101	0.925238301871097	1	no	-	--	-	-	-	-
Unigene0001042	2317.33333333333	1871.66666666667	46.3736	27.0883	41.8158	23.4148	10.2392	41.3575	38.4259	25.0038333333333	-0.619929759516869	0.161741674674571	0.898730181562041	no	SPATA22	PREDICTED: spermatogenesis-associated protein 22-like [Sinocyclocheilus rhinocerous]	-	-	-	-
Unigene0001043	13402	18716.3333333333	296.4970	273.3713	390.7786	391.3060	411.5257	311.1625	320.215633333333	371.3314	0.213663571710799	0.486529064456032	1	no	rpl27	ribosomal protein L27, partial [Hypophthalmichthys nobilis]	ko03010//Ribosome//Translation//Genetic Information Processing	GO:0030529//intracellular ribonucleoprotein complex;GO:0005622//intracellular;GO:0032991//macromolecular complex;GO:0005623//cell;GO:0044464//cell part;GO:0044424//intracellular part;GO:1990904//ribonucleoprotein complex	-	GO:0043170//macromolecule metabolic process;GO:0008152//metabolic process;GO:0010467//gene expression;GO:0071704//organic substance metabolic process
Unigene0001044	32	20	0.7131	1.4652	0.9565	0.8671	0.4466	0.2624	1.04493333333333	0.525366666666667	-0.99201432867654	0.103599495772531	0.826793551183493	no	Cd22	PREDICTED: B-cell receptor CD22-like isoform X1 [Cyprinus carpio]	-	-	-	-
Unigene0001045	148.666666666667	281	1.4069	1.2714	4.3255	5.6295	3.8508	2.1041	2.3346	3.86146666666667	0.725973531513034	0.182511515937311	0.916932998996835	no	SIGLEC14	PREDICTED: B-cell receptor CD22-like isoform X4 [Cyprinus carpio]	-	-	-	-
Unigene0001046	181.666666666667	188.666666666667	2.8717	3.9885	1.3340	2.5681	2.4915	1.5464	2.7314	2.202	-0.310826136214899	0.510382696963239	1	no	CEACAM5	PREDICTED: titin-like [Sinocyclocheilus anshuiensis]	-	-	-	-
Unigene0001047	1691.66666666667	1815.33333333333	6.3786	7.3857	9.6131	5.5282	9.7210	5.8254	7.79246666666667	7.02486666666667	-0.149609235578658	0.670263764141506	1	no	Arhgap39	PREDICTED: rho GTPase-activating protein 39-like [Sinocyclocheilus anshuiensis]	-	GO:0005623//cell;GO:0044464//cell part	-	GO:0044763//single-organism cellular process;GO:0044699//single-organism process;GO:0009987//cellular process;GO:0007154//cell communication
Unigene0001048	347	456	2.7963	3.4621	3.5314	3.9114	3.9722	2.6884	3.26326666666667	3.524	0.110897038281818	0.762143186750178	1	no	Cdk14	PREDICTED: cyclin-dependent kinase 14 isoform X1 [Lates calcarifer]	-	-	-	-
Unigene0001049	15	19	0.8700	0.8087	1.3246	1.7735	0.3529	0.9955	1.0011	1.04063333333333	0.0558757328970509	0.964748613865392	1	no	-	--	-	-	-	-
Unigene0001050	42.3333333333333	46	2.3490	1.9473	2.6350	2.2432	1.6052	2.3084	2.31043333333333	2.05226666666667	-0.170945258194146	0.729965086327745	1	no	-	--	-	-	-	-
Unigene0001051	16	5	2.0366	1.2906	0.7415	0.0000	0.0000	0.9709	1.35623333333333	0.323633333333333	-2.06717329436626	0.0577120383482788	0.742769369413106	no	-	--	-	-	-	-
Unigene0001052	3.66666666666667	13.3333333333333	0.1285	0.9551	0.1871	1.2219	1.9105	0.5389	0.423566666666667	1.22376666666667	1.5306675447947	0.105672838225536	0.830615343303465	no	-	--	-	-	-	-
Unigene0001053	1456.66666666667	1800	42.8593	31.5384	33.9857	34.1324	26.2420	46.8784	36.1278	35.7509333333333	-0.0151284984607001	0.965614766878014	1	no	CHCHD7	PREDICTED: coiled-coil-helix-coiled-coil-helix domain-containing protein 7-like [Sinocyclocheilus rhinocerous]	-	-	-	-
Unigene0001054	20	18	0.6229	1.0422	0.5443	0.7055	0.4015	0.4646	0.736466666666667	0.523866666666667	-0.4914205616168	0.432339113422723	1	no	-	RNA-directed DNA polymerase from mobile element jockey [Larimichthys crocea]	-	-	-	-
Unigene0001055	481.333333333333	635	6.0307	9.3657	8.1494	7.6945	12.3859	5.6180	7.8486	8.56613333333333	0.126208798072179	0.749672097011764	1	no	NDUFV3	PREDICTED: fibrous sheath CABYR-binding protein-like isoform X3 [Sinocyclocheilus rhinocerous]	ko01100//Metabolic pathways//Global and Overview//Metabolism;ko00190//Oxidative phosphorylation//Energy metabolism//Metabolism	-	-	-
Unigene0001056	3	2.33333333333333	0.1883	0.2625	0.2742	0.2559	0.2100	0.0000	0.241666666666667	0.1553	-0.637960664681204	0.591445348046517	1	no	BTN1A1	PREDICTED: E3 ubiquitin-protein ligase TRIM21-like isoform X2 [Sinocyclocheilus rhinocerous]	-	GO:0005623//cell;GO:0044464//cell part	GO:0046914//transition metal ion binding;GO:0043169//cation binding;GO:0043167//ion binding;GO:0005488//binding;GO:0046872//metal ion binding	-
Unigene0001057	2629.66666666667	2253.33333333333	429.9043	276.9838	225.4185	187.7410	94.8647	339.2197	310.768866666667	207.275133333333	-0.584294931819191	0.178313590764261	0.913731421763132	no	-	--	-	-	-	-
Unigene0001058	1907	1911.66666666667	17.5827	14.0320	13.8628	12.1805	9.9092	14.3991	15.1591666666667	12.1629333333333	-0.317699242159294	0.320576422599883	0.984480181773653	no	Trim39	PREDICTED: E3 ubiquitin-protein ligase TRIM39-like isoform X1 [Sinocyclocheilus rhinocerous]	-	GO:0005623//cell;GO:0044464//cell part	GO:0005488//binding;GO:0043169//cation binding;GO:0043167//ion binding;GO:0046914//transition metal ion binding;GO:0046872//metal ion binding	-
Unigene0001059	0.333333333333333	0.666666666666667	0.0000	0.0000	0.1001	0.1869	0.0000	0.0000	0.0333666666666667	0.0623	0.900824594909163	0.999999999999997	1	no	-	PREDICTED: S-antigen protein-like [Cavia porcellus]	-	-	-	-
Unigene0001060	2.33333333333333	4	0.0000	0.2474	0.4846	0.3617	0.1980	0.5584	0.244	0.3727	0.611133671278601	0.640587438230835	1	no	-	--	-	-	-	-
Unigene0001061	10.6666666666667	17	1.6966	0.7359	0.8236	1.2297	1.2617	1.5817	1.08536666666667	1.3577	0.322982227110794	0.606035497803159	1	no	-	--	-	-	-	-
Unigene0001062	300	421.333333333333	3.1868	3.8208	3.4613	4.2125	4.8593	2.9305	3.48963333333333	4.00076666666667	0.197201034126171	0.596217862743206	1	no	TRIB2	PREDICTED: tribbles homolog 2-like [Cyprinus carpio]	-	-	GO:0001882//nucleoside binding;GO:0016772//transferase activity, transferring phosphorus-containing groups;GO:0001883//purine nucleoside binding;GO:0036094//small molecule binding;GO:0003824//catalytic activity;GO:0032549//ribonucleoside binding;GO:0097367//carbohydrate derivative binding;GO:1901363//heterocyclic compound binding;GO:0097159//organic cyclic compound binding;GO:0016301//kinase acti…	GO:0008152//metabolic process;GO:0044238//primary metabolic process;GO:0044237//cellular metabolic process;GO:0044260//cellular macromolecule metabolic process;GO:0071704//organic substance metabolic process;GO:0044267//cellular protein metabolic process;GO:0019538//protein metabolic process;GO:0036211//protein modification process;GO:0009987//cellular process;GO:0043170//macromolecule metabolic …
Unigene0001063	12	19.3333333333333	0.8183	0.3803	0.8938	0.6023	0.5578	1.6211	0.697466666666667	0.927066666666667	0.410548819514092	0.566722750943033	1	no	-	--	-	-	-	-
Unigene0001064	9	6.33333333333333	1.3025	1.0761	1.0538	0.6883	0.6457	0.6071	1.14413333333333	0.647033333333333	-0.822343245767011	0.261033287668835	0.961214133676084	no	-	--	-	-	-	-
Unigene0001065	7	7	0.6194	0.3598	0.4511	0.4209	0.4031	0.3248	0.476766666666667	0.382933333333333	-0.316190124281898	0.766347586487369	1	no	-	--	-	-	-	-
Unigene0001066	7007.66666666667	9926.66666666667	81.9988	79.0435	93.9722	97.4991	101.6289	97.3876	85.0048333333333	98.8385333333333	0.217528728131031	0.457062306626924	1	no	SCCPDH	PREDICTED: saccharopine dehydrogenase-like oxidoreductase [Sinocyclocheilus anshuiensis]	-	-	GO:0003824//catalytic activity	GO:0008152//metabolic process;GO:0044699//single-organism process;GO:0044710//single-organism metabolic process
Unigene0001067	6.33333333333333	3.33333333333333	1.2366	0.1149	0.7203	0.1680	0.1839	0.5188	0.6906	0.290233333333333	-1.25063711157152	0.253744432011269	0.959659974638909	no	-	--	-	-	-	-
Unigene0001068	119.666666666667	133	2.6824	2.2251	3.8434	1.1367	2.4452	4.5780	2.91696666666667	2.71996666666667	-0.100879928801697	0.852145861145966	1	no	-	--	-	-	-	-
Unigene0001069	159	163	4.4059	2.2129	4.5633	1.2458	3.3986	4.8794	3.72736666666667	3.1746	-0.231581922550268	0.660245161721551	1	no	-	--	-	-	-	-
Unigene0001070	19.3333333333333	28.3333333333333	2.6226	0.9603	0.6944	1.7280	0.0591	2.8896	1.42576666666667	1.5589	0.128790487936867	0.889613861150525	1	no	-	--	-	-	-	-
Unigene0001071	105.666666666667	118.333333333333	2.7220	3.6369	3.0226	2.5200	3.7702	2.3077	3.12716666666667	2.86596666666667	-0.125834281660279	0.778080818232066	1	no	-	--	-	-	-	-
Unigene0001072	0	0.333333333333333	0.0000	0.0000	0.0000	0.0000	0.1062	0.0000	0.001	0.0354	5.14567745519564	0.999999999999997	1	no	-	--	-	-	-	-
Unigene0001073	904.333333333333	1114	13.7586	11.5357	13.8102	12.8756	15.1435	11.3885	13.0348333333333	13.1358666666667	0.0111392521484896	0.97425802270994	1	no	Clip1	PREDICTED: CAP-Gly domain-containing linker protein 1-like isoform X3 [Sinocyclocheilus grahami]	-	-	-	-
Unigene0001074	18	11	0.8145	0.9936	0.6302	0.1730	0.2650	0.7475	0.812766666666667	0.395166666666667	-1.04037997826763	0.134602027781513	0.866515485733333	no	-	--	-	-	-	-
Unigene0001075	5.33333333333333	0	0.3884	0.0602	0.4242	0.0000	0.0000	0.0000	0.290933333333333	0.001	-8.18454479071509	0.00221871430143473	0.202444423536823	no	-	--	-	-	-	-
Unigene0001076	15.3333333333333	13.3333333333333	1.5256	0.2363	1.5429	0.8063	0.3782	1.1853	1.1016	0.789933333333333	-0.479797657737358	0.546123829056129	1	no	-	--	-	-	-	-
Unigene0001077	59	27.6666666666667	2.5311	0.4103	1.6288	0.7599	0.7004	0.2675	1.5234	0.575933333333333	-1.40332107229554	0.0353610818653159	0.645459868502302	no	-	PREDICTED: probable basic-leucine zipper transcription factor H [Oreochromis niloticus]	ko03460//Fanconi anemia pathway//Replication and repair//Genetic Information Processing	-	-	-
Unigene0001078	24	48	1.1907	0.3162	0.3716	1.7337	0.6536	0.4559	0.626166666666667	0.947733333333333	0.597934470499544	0.38653690031813	1	no	Klhdc8a	PREDICTED: kelch domain-containing protein 8A [Danio rerio]	-	-	-	-
Unigene0001079	77.3333333333333	193.666666666667	10.1176	7.7728	3.9843	9.8210	25.4130	7.9407	7.29156666666667	14.3915666666667	0.980922921925284	0.0705518757428678	0.771328186060571	no	VMO1	PREDICTED: vitelline membrane outer layer protein 1 homolog [Sinocyclocheilus grahami]	-	-	-	-
Unigene0001080	509.666666666667	236.666666666667	19.2941	58.0196	3.6776	12.1074	6.2879	9.8007	26.9971	9.39866666666667	-1.52227643302599	0.0251804277404605	0.576202854216171	no	VMO1	PREDICTED: vitelline membrane outer layer protein 1-like [Sinocyclocheilus grahami]	-	-	-	-
Unigene0001081	175	177	5.5753	10.0424	1.3112	4.3530	6.2321	2.5182	5.64296666666667	4.36776666666667	-0.36955804036716	0.544363933447446	1	no	VMO1	PREDICTED: vitelline membrane outer layer protein 1-like [Sinocyclocheilus grahami]	-	-	-	-
Unigene0001082	130.333333333333	87	26.3937	0.4824	1.5116	10.5790	0.4411	2.2291	9.46256666666667	4.4164	-1.09936071426388	0.329470207943854	0.987124644324427	no	VMO1	PREDICTED: vitelline membrane outer layer protein 1-like [Sinocyclocheilus grahami]	-	-	-	-
Unigene0001083	2.66666666666667	3	0.0000	0.1051	0.5765	0.4611	0.0841	0.1582	0.2272	0.234466666666667	0.0454199993994707	1	1	no	-	--	-	-	-	-
Unigene0001084	176	208.333333333333	1.7992	1.8927	1.3494	1.2957	1.5704	1.8984	1.68043333333333	1.58816666666667	-0.0814709878493376	0.839660106404482	1	no	-	PREDICTED: RNA-directed DNA polymerase from mobile element jockey-like [Cyprinus carpio]	-	-	-	-
Unigene0001085	15	11.6666666666667	1.2852	1.3652	1.0027	0.8733	0.4779	0.8987	1.2177	0.749966666666667	-0.699260366352765	0.281849617854495	0.973530539713457	no	-	--	-	-	-	-
Unigene0001086	306	305	4.0621	4.1033	4.0740	3.1246	4.1151	2.7224	4.0798	3.3207	-0.297011037919632	0.422531630830064	1	no	ASAH1	PREDICTED: acid ceramidase-like isoform X2 [Sinocyclocheilus rhinocerous]	ko01100//Metabolic pathways//Global and Overview//Metabolism;ko04142//Lysosome//Transport and catabolism//Cellular Processes;ko00600//Sphingolipid metabolism//Lipid metabolism//Metabolism	-	GO:0003824//catalytic activity	GO:0044238//primary metabolic process;GO:0008152//metabolic process
Unigene0001087	1880.33333333333	2476.33333333333	9.9105	20.6419	14.7643	14.2190	24.0719	10.9823	15.1055666666667	16.4244	0.120760362393636	0.755286882595145	1	no	Slc31a1	PREDICTED: LOW QUALITY PROTEIN: high affinity copper uptake protein 1-like [Cyprinus carpio]	-	GO:0016020//membrane;GO:0044425//membrane part;GO:0031224//intrinsic component of membrane	GO:0015075//ion transmembrane transporter activity;GO:0022857//transmembrane transporter activity;GO:0022891//substrate-specific transmembrane transporter activity;GO:0005215//transporter activity;GO:0046915//transition metal ion transmembrane transporter activity;GO:0022890//inorganic cation transmembrane transporter activity;GO:0046873//metal ion transmembrane transporter activity;GO:0008324//c…	GO:0010035//response to inorganic substance;GO:0048545//response to steroid hormone;GO:0000041//transition metal ion transport;GO:0050896//response to stimulus;GO:0051179//localization;GO:0010033//response to organic substance;GO:0009628//response to abiotic stimulus;GO:0009719//response to endogenous stimulus;GO:0006811//ion transport;GO:0033993//response to lipid;GO:0010038//response to metal i…
Unigene0001088	0.666666666666667	0.333333333333333	0.0571	0.0000	0.0416	0.0000	0.0425	0.0000	0.0329	0.0141666666666667	-1.21558724343133	1	1	no	-	--	-	-	-	-
Unigene0001089	764.333333333333	1377.33333333333	7.4436	10.0119	7.9452	8.6051	15.9547	12.8430	8.4669	12.4676	0.558278019562648	0.11681026711422	0.8482661673726	no	PROS1	PREDICTED: vitamin K-dependent protein S [Sinocyclocheilus rhinocerous]	-	-	GO:0046872//metal ion binding;GO:0043167//ion binding;GO:0005488//binding;GO:0043169//cation binding	-
Unigene0001090	921	920.666666666667	2.9751	5.1451	5.0752	2.5240	5.3249	3.2163	4.39846666666667	3.6884	-0.254005556966556	0.515374528080399	1	no	Phip	PREDICTED: PH-interacting protein isoform X1 [Sinocyclocheilus anshuiensis]	-	-	GO:1901363//heterocyclic compound binding;GO:0003676//nucleic acid binding;GO:0005488//binding;GO:0097159//organic cyclic compound binding	-
Unigene0001091	28.6666666666667	30.3333333333333	1.6695	0.4622	0.6466	0.7723	0.4226	1.0680	0.9261	0.7543	-0.296029557749738	0.660012738269652	1	no	-	--	-	-	-	-
Unigene0001092	3.66666666666667	3.33333333333333	0.4540	0.2813	0.6611	0.2056	0.4501	0.4232	0.465466666666667	0.359633333333333	-0.372151110050255	0.752499011898185	1	no	-	--	-	-	-	-
Unigene0001093	90	67.3333333333333	9.1026	5.9963	6.0490	3.9032	3.6804	5.0053	7.0493	4.1963	-0.748362181973477	0.100490209189781	0.823760796069334	no	-	--	-	-	-	-
Unigene0001094	44.6666666666667	47.6666666666667	1.3158	1.4221	0.9136	0.9565	1.2971	0.8559	1.21716666666667	1.0365	-0.231806613404132	0.654673778191212	1	no	-	PREDICTED: LOW QUALITY PROTEIN: protein FAM111A-like [Sinocyclocheilus grahami]	-	-	-	-
Unigene0001095	206	223.333333333333	8.6554	7.7868	8.4258	6.9504	6.5399	8.3822	8.28933333333333	7.29083333333333	-0.185172355898674	0.62805071835194	1	no	-	PREDICTED: uncharacterized protein LOC100496506 [Xenopus tropicalis]	-	-	-	-
Unigene0001096	18.6666666666667	35.6666666666667	0.7365	0.5476	1.0368	1.7014	1.3509	0.6523	0.773633333333333	1.23486666666667	0.674633414568345	0.252730247181483	0.959330162234307	no	-	--	-	-	-	-
Unigene0001097	7.33333333333333	15	0.8917	0.2072	0.3787	0.9593	0.2763	1.0911	0.492533333333333	0.775566666666667	0.655029433116121	0.407748068879182	1	no	-	--	-	-	-	-
Unigene0001098	11.6666666666667	10.3333333333333	0.9795	0.8346	0.7132	0.6101	0.4856	0.6849	0.842433333333333	0.593533333333333	-0.505233466818063	0.480861256727618	1	no	-	--	-	-	-	-
Unigene0001099	9324.66666666667	9458.33333333333	115.8461	84.8517	85.7838	73.9635	45.5587	111.5172	95.4938666666667	77.0131333333333	-0.310303580524936	0.388129396141254	1	no	tmem214-b	PREDICTED: transmembrane protein 214 [Sinocyclocheilus rhinocerous]	-	-	-	-
Unigene0001100	7772.66666666667	10421	29.0673	30.7156	34.7228	38.7205	33.0809	31.9832	31.5019	34.5948666666667	0.135119134832674	0.647306178271911	1	no	baz1b	PREDICTED: tyrosine-protein kinase BAZ1B-like [Sinocyclocheilus anshuiensis]	-	-	-	-
Unigene0001101	1.66666666666667	1	0.0000	0.1564	0.1837	0.1143	0.0000	0.0588	0.113366666666667	0.0577	-0.974353281341208	0.789406029460275	1	no	-	--	-	-	-	-
Unigene0001102	18.3333333333333	28.6666666666667	1.8820	1.4451	0.7746	1.8348	1.3388	1.7737	1.36723333333333	1.6491	0.270419409554057	0.630810144293038	1	no	-	--	-	-	-	-
Unigene0001103	13.6666666666667	12.6666666666667	1.4907	1.2790	1.3360	1.0129	1.1939	0.8820	1.36856666666667	1.0296	-0.410581755408139	0.531256118029881	1	no	-	--	-	-	-	-
Unigene0001104	27.3333333333333	26.6666666666667	0.9687	1.5165	1.1509	1.0393	1.0616	0.7843	1.21203333333333	0.961733333333333	-0.333720548142554	0.558906706492777	1	no	-	--	-	-	-	-
Unigene0001105	439.666666666667	147	15.9773	54.0650	5.9533	6.0642	10.3965	3.2293	25.3318666666667	6.56333333333333	-1.94845278044912	0.00356948107317713	0.252564884549832	no	-	PREDICTED: small ubiquitin-related modifier 1-B-like [Clupea harengus]	-	-	-	-
Unigene0001106	193.666666666667	212	4.6433	3.4907	3.5136	3.4025	4.0963	2.7692	3.88253333333333	3.42266666666667	-0.181877515673653	0.646165276045557	1	no	-	--	-	-	-	-
Unigene0001107	55.3333333333333	45	1.7257	1.7498	2.1133	1.0127	1.3125	1.4260	1.86293333333333	1.2504	-0.575186363674042	0.222982429360372	0.941935851582344	no	-	--	-	-	-	-
Unigene0001108	64.6666666666667	47.3333333333333	2.7550	2.4123	1.7444	1.3565	0.3860	2.2056	2.3039	1.31603333333333	-0.807882067411107	0.174356443412788	0.910379598055595	no	-	--	-	-	-	-
Unigene0001109	212	237.666666666667	2.6598	2.6719	3.6209	2.3461	3.9192	2.1370	2.9842	2.80076666666667	-0.0915224309892659	0.823957443943908	1	no	FHDC1	PREDICTED: FH2 domain-containing protein 1-like [Sinocyclocheilus rhinocerous]	-	-	-	-
Unigene0001110	47.3333333333333	62.6666666666667	1.0287	0.6719	1.5993	0.9634	1.6334	1.1275	1.09996666666667	1.24143333333333	0.174546983843508	0.750956949824349	1	no	-	--	-	-	-	-
Unigene0001111	56.3333333333333	40.3333333333333	3.9181	3.6418	4.3389	1.9412	3.3386	1.7693	3.96626666666667	2.3497	-0.75530510731236	0.125220939789627	0.857561992700285	no	-	--	-	-	-	-
Unigene0001112	20.6666666666667	15.6666666666667	3.3702	1.3574	1.5542	0.6107	0.4177	2.6707	2.09393333333333	1.23303333333333	-0.764003708950761	0.326328924702898	0.986420158823011	no	-	--	-	-	-	-
Unigene0001113	0	0	0.0000	0.0000	0.0000	0.0000	0.0000	0.0000	0.001	0.001	0	notest	notest	notest	-	--	-	-	-	-
Unigene0001114	78	118.666666666667	3.5026	2.5461	3.1064	3.6615	3.9406	3.7051	3.0517	3.76906666666667	0.304594169631014	0.474736585973327	1	no	-	--	-	-	-	-
Unigene0001115	213.333333333333	152	13.5913	26.7364	12.5402	12.0181	11.9073	6.1186	17.6226333333333	10.0146666666667	-0.815315118370823	0.0780202862534645	0.788142198413434	no	-	PREDICTED: keratinocyte-associated transmembrane protein 2 [Sinocyclocheilus grahami]	-	-	-	-
Unigene0001116	24.3333333333333	15.6666666666667	1.9252	2.8119	3.7048	1.5884	2.5566	0.4808	2.81396666666667	1.54193333333333	-0.867864848401604	0.200494274334747	0.927678683613692	no	-	--	-	-	-	-
Unigene0001117	3158.33333333333	1554.33333333333	25.6727	8.5061	14.4277	5.9087	1.8697	10.9633	16.2021666666667	6.24723333333333	-1.37489743275817	0.011126074503859	0.422726591431082	no	SLC24A4	PREDICTED: sodium/potassium/calcium exchanger 4-like isoform X3 [Sinocyclocheilus anshuiensis]	-	GO:0016020//membrane;GO:0044425//membrane part;GO:0031224//intrinsic component of membrane	-	GO:0009987//cellular process;GO:0044763//single-organism cellular process;GO:0044699//single-organism process
Unigene0001118	0	0	0.0000	0.0000	0.0000	0.0000	0.0000	0.0000	0.001	0.001	0	notest	notest	notest	-	--	-	-	-	-
Unigene0001119	27.3333333333333	20.6666666666667	0.5912	0.7632	0.9327	0.3348	0.4885	0.6201	0.762366666666667	0.481133333333333	-0.664048286918387	0.247921369754099	0.956137045139247	no	-	--	-	-	-	-
Unigene0001120	1272.66666666667	1370.33333333333	41.2660	34.2673	36.4539	35.7964	34.8829	26.8820	37.3290666666667	32.5204333333333	-0.198952956204923	0.538907692080142	1	no	lamtor4	PREDICTED: ragulator complex protein LAMTOR4 [Sinocyclocheilus grahami]	-	GO:0012505//endomembrane system;GO:0000323//lytic vacuole;GO:0043226//organelle;GO:0044424//intracellular part;GO:0016020//membrane;GO:0044446//intracellular organelle part;GO:0044440//endosomal part;GO:0098805//whole membrane;GO:0005737//cytoplasm;GO:0044444//cytoplasmic part;GO:0043231//intracellular membrane-bounded organelle;GO:0031090//organelle membrane;GO:0043229//intracellular organelle;G…	GO:0005515//protein binding;GO:0005488//binding	GO:0065007//biological regulation;GO:0008104//protein localization;GO:0044699//single-organism process;GO:0023052//signaling;GO:0033036//macromolecule localization;GO:0051641//cellular localization;GO:0051179//localization;GO:1901700//response to oxygen-containing compound;GO:0009719//response to endogenous stimulus;GO:0031929//TOR signaling;GO:0010243//response to organonitrogen compound;GO:0044…
Unigene0001121	85.3333333333333	108	2.2782	1.8917	2.5215	2.1053	2.3493	2.5063	2.23046666666667	2.3203	0.0569657608491349	0.904421160174829	1	no	-	--	-	-	-	-
Unigene0001122	17	25.6666666666667	0.7475	0.5095	0.9072	1.7270	0.5930	0.3485	0.7214	0.8895	0.302195182366952	0.672359854936789	1	no	-	--	-	-	-	-
Unigene0001123	2467	3259	28.1230	29.8227	32.9745	34.8281	30.3799	33.0395	30.3067333333333	32.7491666666667	0.111819839406181	0.709356865578479	1	no	GMCL1	PREDICTED: germ cell-less protein-like 1 [Sinocyclocheilus rhinocerous]	-	-	-	-
Unigene0001124	46.3333333333333	60.3333333333333	1.1410	0.6128	1.2555	1.0682	1.3011	0.8865	1.0031	1.08526666666667	0.11358414175942	0.837456339761015	1	no	Tf2-9	PREDICTED: adhesion G protein-coupled receptor E1-like [Danio rerio]	ko03013//RNA transport//Translation//Genetic Information Processing	-	-	-
Unigene0001125	21	29	0.6231	0.9773	0.5671	0.5028	1.5639	0.3812	0.7225	0.815966666666667	0.175512629758761	0.810387158105048	1	no	-	--	-	-	-	-
Unigene0001126	24.3333333333333	10.6666666666667	1.5619	2.0199	0.8901	0.1384	0.3535	1.0447	1.49063333333333	0.5122	-1.54114626842866	0.0396117812389802	0.668076958682721	no	-	PREDICTED: uncharacterized protein LOC109091437 isoform X3 [Cyprinus carpio]	-	-	-	-
Unigene0001127	18.3333333333333	13	2.2164	0.9810	1.8444	0.6454	1.4128	0.8856	1.6806	0.981266666666667	-0.776259231075683	0.230908166681745	0.946973593110888	no	-	PREDICTED: myosin-IIIa-like [Sinocyclocheilus rhinocerous]	-	-	-	-
Unigene0001128	1148.33333333333	1032	28.1876	20.1748	20.9239	14.0816	15.2420	20.5871	23.0954333333333	16.6369	-0.47322097820711	0.165867795430918	0.901263992597634	no	-	PREDICTED: RNA-directed DNA polymerase from mobile element jockey-like, partial [Cynoglossus semilaevis]	-	-	-	-
Unigene0001129	206.333333333333	173.666666666667	16.6020	7.3904	10.7920	6.8289	5.5818	10.8969	11.5948	7.7692	-0.577639978922371	0.201588661972251	0.928736417264713	no	-	PREDICTED: myosin-IIIa-like [Sinocyclocheilus rhinocerous]	-	-	-	-
Unigene0001130	206.666666666667	173	23.9547	10.6304	14.8854	12.2381	6.8310	13.6642	16.4901666666667	10.9111	-0.595809426258802	0.189935953064324	0.921442169475922	no	-	PREDICTED: myosin-IIIa-like [Sinocyclocheilus rhinocerous]	-	-	-	-
Unigene0001131	36.6666666666667	41.3333333333333	2.3004	2.7395	1.9368	2.2469	2.2453	1.8096	2.32556666666667	2.1006	-0.146780830374891	0.778503422560045	1	no	-	--	-	-	-	-
Unigene0001132	43.6666666666667	12	5.1052	1.5281	3.3393	0.0000	1.8661	0.4235	3.3242	0.7632	-2.12287410779661	0.017135345124284	0.499992276737908	no	-	--	-	-	-	-
Unigene0001133	58.3333333333333	81	1.3352	1.8138	1.9694	2.3263	2.3169	1.2448	1.70613333333333	1.96266666666667	0.202084773828707	0.685901010728667	1	no	-	PREDICTED: GRIP and coiled-coil domain-containing protein 2-like [Sinocyclocheilus grahami]	-	-	-	-
Unigene0001134	4	4	0.3331	0.0774	0.4244	0.1132	0.4954	0.1164	0.2783	0.241666666666667	-0.203622414263102	0.902868123925226	1	no	-	--	-	-	-	-
Unigene0001135	395	290.333333333333	9.8282	9.1351	11.5421	5.5583	6.1947	6.7045	10.1684666666667	6.1525	-0.724857489523764	0.0427879993382518	0.683374525508927	no	NKTR	Nktr protein, partial [Danio rerio]	-	-	GO:0016859//cis-trans isomerase activity;GO:0003824//catalytic activity;GO:0016853//isomerase activity	-
Unigene0001136	34.6666666666667	22.6666666666667	3.1716	2.0455	0.9898	0.9236	0.5776	1.5841	2.06896666666667	1.02843333333333	-1.00846212565201	0.104360600129293	0.82869859439873	no	-	--	-	-	-	-
Unigene0001137	158.333333333333	174.666666666667	4.7966	6.8451	7.9027	7.2427	6.2694	4.4041	6.5148	5.97206666666667	-0.125490619216386	0.767640099150036	1	no	-	--	-	-	-	-
Unigene0001138	274.333333333333	252.333333333333	9.9882	11.9023	14.0984	8.4226	9.7514	9.2762	11.9963	9.15006666666667	-0.390735346360342	0.293747048219353	0.977725172132931	no	-	--	-	-	-	-
Unigene0001139	4.66666666666667	3.33333333333333	0.2616	0.3242	0.4445	0.1778	0.1946	0.2439	0.343433333333333	0.205433333333333	-0.741359782445778	0.456456796647908	1	no	-	--	-	-	-	-
Unigene0001140	22	12	2.8610	0.7387	1.1574	0.4860	0.3546	1.1670	1.5857	0.6692	-1.24461050160507	0.0917759988551189	0.813028331386739	no	-	--	-	-	-	-
Unigene0001141	0	0	0.0000	0.0000	0.0000	0.0000	0.0000	0.0000	0.001	0.001	0	notest	notest	notest	-	--	-	-	-	-
Unigene0001142	461.666666666667	327	19.4783	10.5305	8.1173	8.0481	2.2302	10.4001	12.7087	6.8928	-0.88265440143339	0.0919906568473699	0.813571111564419	no	-	hypothetical protein cypCar_00037063 [Cyprinus carpio]	-	-	-	-
Unigene0001143	42	34	0.9984	1.3471	1.1726	0.5690	0.7185	1.0359	1.1727	0.774466666666667	-0.59855893912833	0.232814381652182	0.947815895265116	no	-	--	-	-	-	-
Unigene0001144	20.3333333333333	25.3333333333333	3.7792	1.2159	2.7518	3.3580	2.2700	2.1343	2.5823	2.58743333333333	0.00286507504340552	1	1	no	-	--	-	-	-	-
Unigene0001145	0	0.333333333333333	0.0000	0.0000	0.0000	0.1033	0.0000	0.0000	0.001	0.0344333333333333	5.10573394325654	0.999999999999997	1	no	-	--	-	-	-	-
Unigene0001146	131	140.666666666667	10.0589	11.8538	9.0902	8.4214	8.2819	10.0477	10.3343	8.917	-0.212810347950707	0.602837696580061	1	no	-	--	-	-	-	-
Unigene0001147	3.33333333333333	9.33333333333333	0.4494	0.4177	0.1636	0.6870	0.6683	0.8641	0.343566666666667	0.7398	1.10654522954867	0.196869490862389	0.92446813109818	no	-	--	-	-	-	-
Unigene0001148	821.333333333333	445	4.7336	2.4412	3.5995	1.3741	0.7352	2.5557	3.59143333333333	1.555	-1.20764515511228	0.00841823777980239	0.374697266418632	no	Pol	pol-like protein [Danio rerio]	-	-	-	-
Unigene0001149	47.6666666666667	14.6666666666667	3.0609	1.6414	2.6146	0.2400	0.1751	1.3994	2.43896666666667	0.604833333333333	-2.01166048487388	0.00608033333409863	0.329642226997145	no	-	--	-	-	-	-
Unigene0001150	231	189.333333333333	10.8858	7.7518	8.1504	5.8756	5.0596	6.6295	8.92933333333333	5.8549	-0.60890793720637	0.118634518283014	0.851620912590947	no	-	--	-	-	-	-
Unigene0001151	40	30	4.5421	1.0163	3.2461	1.9432	1.7514	1.6468	2.93483333333333	1.78046666666667	-0.721023149974237	0.220341792708603	0.940880886627525	no	-	--	-	-	-	-
Unigene0001152	8.66666666666667	16.3333333333333	0.4056	0.5385	0.3797	0.3543	0.7325	0.9318	0.441266666666667	0.672866666666667	0.608669882750031	0.384840121316943	1	no	-	--	-	-	-	-
Unigene0001153	65.3333333333333	96	3.6197	5.9812	4.1586	5.4109	5.4435	5.5119	4.5865	5.45543333333333	0.250300156810729	0.581472385177177	1	no	-	--	-	-	-	-
Unigene0001154	452	452.333333333333	2.4740	3.5470	3.4028	2.4337	3.1265	2.2274	3.14126666666667	2.59586666666667	-0.275130137579858	0.444123549768229	1	no	HIP1R	PREDICTED: huntingtin-interacting protein 1-related protein [Sinocyclocheilus rhinocerous]	-	-	GO:0005488//binding;GO:0008289//lipid binding	-
Unigene0001155	615.666666666667	634.666666666667	14.3363	12.2300	12.9952	13.0439	10.8804	9.0287	13.1871666666667	10.9843333333333	-0.263687315486218	0.442900116539449	1	no	STX8	PREDICTED: syntaxin-8-like isoform X1 [Sinocyclocheilus rhinocerous]	ko04130//SNARE interactions in vesicular transport//Folding, sorting and degradation//Genetic Information Processing	-	-	-
Unigene0001156	62.3333333333333	44.6666666666667	4.0580	2.6193	2.6676	1.2638	2.2633	1.8522	3.11496666666667	1.7931	-0.796760776420185	0.107532934713783	0.832897377604768	no	-	--	-	-	-	-
Unigene0001157	5.66666666666667	8.33333333333333	0.1593	0.2962	1.6242	1.5156	0.3555	0.8913	0.693233333333333	0.9208	0.409546806960369	0.750497488235213	1	no	-	--	-	-	-	-
Unigene0001158	14.6666666666667	16.3333333333333	0.7233	0.9168	0.8618	0.8042	0.8802	0.5977	0.833966666666667	0.7607	-0.132662115796079	0.869236575500316	1	no	-	--	-	-	-	-
Unigene0001159	25.6666666666667	57.6666666666667	0.0338	1.9488	0.3447	0.6893	2.0622	1.4424	0.775766666666667	1.39796666666667	0.849635269042226	0.333373360571348	0.988364039424551	no	-	--	-	-	-	-
Unigene0001160	46	70.3333333333333	2.3672	1.7602	3.6936	4.5955	2.1627	3.2158	2.607	3.32466666666667	0.350819119408403	0.509291378104782	1	no	-	--	-	-	-	-
Unigene0001161	90.3333333333333	112	2.6540	2.8888	2.6954	2.4203	4.1552	1.8069	2.74606666666667	2.79413333333333	0.0250342159673704	0.95822941120189	1	no	-	--	-	-	-	-
Unigene0001162	2029.33333333333	1925.66666666667	70.1750	32.1635	39.5657	32.6230	22.0797	51.2427	47.3014	35.3151333333333	-0.421596340815801	0.293833287090893	0.977725172132931	no	-	--	-	-	-	-
Unigene0001163	98.6666666666667	98.3333333333333	3.4226	4.7330	2.7961	3.2898	2.0486	3.2979	3.65056666666667	2.87876666666667	-0.342669568111067	0.453096967552398	1	no	-	PREDICTED: large proline-rich protein BAG6-like [Cyprinus carpio]	-	-	-	-
Unigene0001164	128.666666666667	120	5.5234	3.0106	3.2026	2.3399	2.5609	3.7667	3.9122	2.88916666666667	-0.437326695113021	0.335550470549827	0.988364039424551	no	-	PREDICTED: adhesion G protein-coupled receptor E1-like [Danio rerio]	-	-	-	-
Unigene0001165	208.333333333333	163	3.0555	2.2518	4.2391	3.2923	1.6134	1.2768	3.18213333333333	2.06083333333333	-0.626766452846162	0.183456950355363	0.918131584929155	no	Tf2-8	Retrotransposable element Tf2 protein type 1 [Larimichthys crocea]	ko03013//RNA transport//Translation//Genetic Information Processing	-	-	-
Unigene0001166	713.333333333333	982.666666666667	11.1166	10.5803	13.2785	16.3486	12.8535	10.3285	11.6584666666667	13.1768666666667	0.176629295690688	0.609260379908831	1	no	GTF3C5	PREDICTED: general transcription factor 3C polypeptide 5 [Sinocyclocheilus rhinocerous]	-	-	-	-
Unigene0001167	4	12	0.4768	0.5540	0.2604	0.9720	0.7979	1.2503	0.4304	1.00673333333333	1.22593160537643	0.11466342579557	0.844515768938097	no	-	--	-	-	-	-
Unigene0001168	617.666666666667	701.333333333333	22.7987	26.7834	25.8429	25.6484	26.4980	17.8478	25.1416666666667	23.3314	-0.107807411856023	0.75618275172354	1	no	HSBP1	PREDICTED: heat shock factor-binding protein 1-like [Sinocyclocheilus grahami]	-	-	-	-
Unigene0001169	16	16	0.5260	0.4513	0.6777	0.3024	0.5116	0.5659	0.551666666666667	0.459966666666667	-0.26226749693593	0.677461765538789	1	no	-	PREDICTED: docking protein 1-like [Cyprinus carpio]	-	-	-	-
Unigene0001170	11	17.6666666666667	0.2046	0.8081	0.4469	0.7645	0.7607	0.3934	0.486533333333333	0.639533333333333	0.394480906061923	0.566560745363547	1	no	-	--	-	-	-	-
Unigene0001171	10.3333333333333	19	0.1905	0.4131	0.9708	0.5608	1.1803	0.8434	0.5248	0.8615	0.715083076494227	0.336854307805725	0.988364039424551	no	-	--	-	-	-	-
Unigene0001172	7.33333333333333	9.33333333333333	0.2222	0.3442	0.1618	0.2768	0.2754	0.1812	0.242733333333333	0.244466666666667	0.0102655252671551	1	1	no	Ephb2	PREDICTED: ephrin type-B receptor 2 isoform X1 [Danio rerio]	-	-	-	-
Unigene0001173	17.3333333333333	18	1.8535	0.8958	0.7558	1.4105	0.3308	1.0368	1.16836666666667	0.926033333333333	-0.335357073454086	0.658209718797243	1	no	-	--	-	-	-	-
Unigene0001174	45.3333333333333	24.6666666666667	1.6016	3.6643	2.0633	1.2557	0.9162	1.0337	2.44306666666667	1.06853333333333	-1.1930613184	0.0281541400171368	0.599693388066114	no	-	--	-	-	-	-
Unigene0001175	50	56	1.8055	1.1188	2.1911	1.7720	1.8200	1.1783	1.70513333333333	1.5901	-0.100767057371273	0.851453409551311	1	no	-	--	-	-	-	-
Unigene0001176	0.333333333333333	2.33333333333333	0.0000	0.0000	0.0413	0.1542	0.1266	0.0000	0.0137666666666667	0.0936	2.76532924888511	0.239212387838993	0.951008745779782	no	-	--	-	-	-	-
Unigene0001177	37.3333333333333	383.333333333333	1.9816	0.5716	0.8956	23.8182	2.8965	0.2389	1.1496	8.98453333333333	2.96631160358634	0.00419284384523726	0.276263611550631	no	pxn1	PREDICTED: fucolectin-4-like [Sinocyclocheilus grahami]	-	-	-	-
Unigene0001178	14.6666666666667	113.333333333333	1.3404	0.0859	0.4375	8.6367	2.0280	0.1939	0.621266666666667	3.61953333333333	2.54251914717278	0.0139312044757848	0.458926267697072	no	-	--	-	-	-	-
Unigene0001179	113.333333333333	107.333333333333	1.7072	1.0151	1.0695	0.7591	0.9895	1.1147	1.26393333333333	0.954433333333333	-0.40520403522691	0.35661427708463	0.993967823131616	no	TBX18	PREDICTED: T-box transcription factor TBX18-like isoform X2 [Sinocyclocheilus rhinocerous]	-	GO:0043231//intracellular membrane-bounded organelle;GO:0043226//organelle;GO:0044424//intracellular part;GO:0005622//intracellular;GO:0043227//membrane-bounded organelle;GO:0044464//cell part;GO:0043229//intracellular organelle;GO:0005623//cell	GO:0003676//nucleic acid binding;GO:1901363//heterocyclic compound binding;GO:0005488//binding;GO:0097159//organic cyclic compound binding	GO:0043170//macromolecule metabolic process;GO:0006807//nitrogen compound metabolic process;GO:0006139//nucleobase-containing compound metabolic process;GO:0034645//cellular macromolecule biosynthetic process;GO:0090304//nucleic acid metabolic process;GO:1901360//organic cyclic compound metabolic process;GO:0016070//RNA metabolic process;GO:0044260//cellular macromolecule metabolic process;GO:003…
Unigene0001180	4	1.33333333333333	0.4058	0.0000	0.0985	0.0919	0.0335	0.0000	0.1681	0.0418	-2.00774487715528	0.167901422065793	0.903374127910831	no	-	PREDICTED: Hermansky-Pudlak syndrome 5 protein [Callorhinchus milii]	-	-	-	-
Unigene0001181	10.6666666666667	6.66666666666667	0.8331	1.5488	0.3370	0.1258	0.8261	0.3884	0.9063	0.446766666666667	-1.02046713466105	0.23995483080401	0.951106146117918	no	-	--	-	-	-	-
Unigene0001182	6	6	0.7112	0.5288	0.9321	1.0631	0.3173	0.3978	0.724033333333333	0.592733333333333	-0.288672926089042	0.836158139809484	1	no	-	PREDICTED: neuron navigator 3-like [Poecilia mexicana]	ko03013//RNA transport//Translation//Genetic Information Processing	-	-	-
Unigene0001183	428.666666666667	421	9.2154	7.0624	6.0009	6.6059	4.3611	6.3074	7.42623333333333	5.75813333333333	-0.367029449760323	0.321671998070556	0.985170574964749	no	fuz	PREDICTED: protein fuzzy homolog [Sinocyclocheilus rhinocerous]	-	-	-	-
Unigene0001184	1826	2302.66666666667	10.0048	12.9417	12.6953	11.7542	11.2642	13.7852	11.8806	12.2678666666667	0.0462766941841934	0.8824992555238	1	no	Sp4	PREDICTED: LOW QUALITY PROTEIN: transcription factor Sp4-like [Cyprinus carpio]	-	-	GO:0097159//organic cyclic compound binding;GO:0005488//binding	-
Unigene0001185	0	0	0.0000	0.0000	0.0000	0.0000	0.0000	0.0000	0.001	0.001	0	notest	notest	notest	-	novel protein similar to DNA polymerases [Danio rerio]	-	-	-	-
Unigene0001186	500.666666666667	665.666666666667	18.4065	12.8112	23.8168	26.8046	17.3513	16.4353	18.3448333333333	20.1970666666667	0.138771980036083	0.718163902713878	1	no	-	--	-	-	-	-
Unigene0001187	25.6666666666667	26.3333333333333	0.9196	0.6246	0.8241	0.6729	0.8680	0.4451	0.789433333333333	0.662	-0.253986220388794	0.653112931198261	1	no	-	--	-	-	-	-
Unigene0001188	25.3333333333333	22.3333333333333	1.8684	2.2851	2.2914	1.8041	0.9507	1.8566	2.1483	1.53713333333333	-0.482953160909023	0.386207631470628	1	no	-	--	-	-	-	-
Unigene0001189	0.333333333333333	0.333333333333333	0.1593	0.0000	0.0000	0.1083	0.0000	0.0000	0.0531	0.0361	-0.556713023916983	1	1	no	-	--	-	-	-	-
Unigene0001190	1.66666666666667	4	0.0000	0.5652	0.1107	0.8264	0.0000	0.4252	0.2253	0.4172	0.888891844284338	0.599421235420154	1	no	-	--	-	-	-	-
Unigene0001191	172.666666666667	165.666666666667	3.8092	3.4394	4.7946	2.6992	3.2982	3.5767	4.0144	3.19136666666667	-0.331010001716989	0.405634582275975	1	no	-	PREDICTED: myosin-IIIa-like [Sinocyclocheilus rhinocerous]	-	-	-	-
Unigene0001192	22	32.3333333333333	1.1791	0.7828	0.5519	1.0587	0.9395	0.8833	0.837933333333333	0.9605	0.196950147406937	0.739700839134135	1	no	-	--	-	-	-	-
Unigene0001193	4	3.33333333333333	0.1576	0.1465	0.1148	0.1071	0.1172	0.0551	0.139633333333333	0.0931333333333333	-0.584273863457057	0.63723827096398	1	no	-	--	-	-	-	-
Unigene0001194	498	529.666666666667	6.2767	4.8429	4.8175	3.3674	5.6229	4.7108	5.31236666666667	4.56703333333333	-0.218097407336624	0.54720439177011	1	no	Irf2	PREDICTED: interferon regulatory factor 2-like [Sinocyclocheilus anshuiensis]	-	-	-	-
Unigene0001195	42.3333333333333	26.3333333333333	1.0101	1.0730	2.8720	0.8171	1.0373	0.8408	1.6517	0.8984	-0.878521839489972	0.129575121359051	0.861491984091652	no	-	--	-	-	-	-
Unigene0001196	1980.33333333333	2241.33333333333	63.8614	49.7535	23.5442	46.3207	11.3199	60.1780	45.7197	39.2728666666667	-0.219283027711875	0.670348018176837	1	no	QRICH2	PREDICTED: neurofilament heavy polypeptide-like [Sinocyclocheilus anshuiensis]	-	-	-	-
Unigene0001197	0	0	0.0000	0.0000	0.0000	0.0000	0.0000	0.0000	0.001	0.001	0	notest	notest	notest	-	--	-	-	-	-
Unigene0001198	43	73	0.8203	0.6671	0.8064	0.8639	1.5251	0.8173	0.7646	1.06876666666667	0.483169812706197	0.32920614709346	0.987124644324427	no	-	--	-	-	-	-
Unigene0001199	334.666666666667	320	0.8199	1.1486	1.3711	0.6131	1.3828	0.7022	1.1132	0.899366666666667	-0.307731494448965	0.468760643007764	1	no	LRRK2	PREDICTED: leucine-rich repeat serine/threonine-protein kinase 2-like [Sinocyclocheilus rhinocerous]	-	GO:0044464//cell part;GO:0005623//cell	GO:0097159//organic cyclic compound binding;GO:0097367//carbohydrate derivative binding;GO:0016301//kinase activity;GO:0032550//purine ribonucleoside binding;GO:0032549//ribonucleoside binding;GO:0016740//transferase activity;GO:0001882//nucleoside binding;GO:0003824//catalytic activity;GO:0036094//small molecule binding;GO:0004672//protein kinase activity;GO:0001883//purine nucleoside binding;GO…	GO:0009987//cellular process;GO:0007154//cell communication;GO:0043170//macromolecule metabolic process;GO:0043412//macromolecule modification;GO:0044260//cellular macromolecule metabolic process;GO:0044237//cellular metabolic process;GO:0007165//signal transduction;GO:0035556//intracellular signal transduction;GO:0044238//primary metabolic process;GO:0071704//organic substance metabolic process;…
Unigene0001200	17613.6666666667	25269	196.8106	210.7569	234.4214	306.8859	240.2204	206.1554	213.9963	251.087233333333	0.230602823243769	0.447139036927331	1	no	Cct7	PREDICTED: T-complex protein 1 subunit eta-like [Sinocyclocheilus anshuiensis]	-	GO:0005622//intracellular;GO:0005623//cell;GO:0044424//intracellular part;GO:0044464//cell part	GO:0097367//carbohydrate derivative binding;GO:0097159//organic cyclic compound binding;GO:0001883//purine nucleoside binding;GO:0005488//binding;GO:0001882//nucleoside binding;GO:1901363//heterocyclic compound binding;GO:0005515//protein binding;GO:0036094//small molecule binding;GO:0032550//purine ribonucleoside binding;GO:0032549//ribonucleoside binding	GO:0043170//macromolecule metabolic process;GO:0044267//cellular protein metabolic process;GO:0044260//cellular macromolecule metabolic process;GO:0009987//cellular process;GO:0071704//organic substance metabolic process;GO:0044237//cellular metabolic process;GO:0008152//metabolic process;GO:0019538//protein metabolic process;GO:0044238//primary metabolic process
Unigene0001201	17.6666666666667	17	2.1713	1.6995	1.4978	0.6212	2.6345	0.9589	1.78953333333333	1.40486666666667	-0.349150203451936	0.644745178406523	1	no	-	--	-	-	-	-
Unigene0001202	2663.66666666667	2447.66666666667	10.7745	10.6111	9.9532	6.7326	7.8958	8.6885	10.4462666666667	7.7723	-0.426573944496301	0.159803919791502	0.897034204399289	no	ago3	PREDICTED: protein argonaute-3 isoform X2 [Esox lucius]	-	GO:0032991//macromolecular complex;GO:0005622//intracellular;GO:0031332//RNAi effector complex;GO:0044424//intracellular part;GO:0005623//cell;GO:0044464//cell part;GO:0030529//intracellular ribonucleoprotein complex;GO:1990904//ribonucleoprotein complex	GO:0003723//RNA binding;GO:1901363//heterocyclic compound binding;GO:0097159//organic cyclic compound binding;GO:0005488//binding;GO:0003676//nucleic acid binding	GO:0060255//regulation of macromolecule metabolic process;GO:1901576//organic substance biosynthetic process;GO:0019538//protein metabolic process;GO:0044763//single-organism cellular process;GO:0071704//organic substance metabolic process;GO:0051172//negative regulation of nitrogen compound metabolic process;GO:0010467//gene expression;GO:0065007//biological regulation;GO:0032269//negative regul…
Unigene0001203	415.333333333333	414.666666666667	4.6853	6.2411	5.2370	4.4712	4.0169	4.6011	5.3878	4.36306666666667	-0.304353779716787	0.384317276138291	1	no	ago3	PREDICTED: protein argonaute-3-like isoform X1 [Clupea harengus]	-	GO:0032991//macromolecular complex;GO:1990904//ribonucleoprotein complex;GO:0030529//intracellular ribonucleoprotein complex;GO:0044424//intracellular part;GO:0005623//cell;GO:0044464//cell part;GO:0005622//intracellular;GO:0031332//RNAi effector complex	GO:0005488//binding;GO:0003723//RNA binding;GO:0097159//organic cyclic compound binding;GO:0003676//nucleic acid binding;GO:1901363//heterocyclic compound binding	GO:0044237//cellular metabolic process;GO:0043170//macromolecule metabolic process;GO:0043603//cellular amide metabolic process;GO:0065007//biological regulation;GO:0010556//regulation of macromolecule biosynthetic process;GO:0044249//cellular biosynthetic process;GO:0051246//regulation of protein metabolic process;GO:0051248//negative regulation of protein metabolic process;GO:0009892//negative …
Unigene0001204	2.66666666666667	2	0.4361	0.1351	0.4234	0.1975	0.1081	0.3049	0.331533333333333	0.2035	-0.704125135927995	0.540685386833665	1	no	Prkag2	PREDICTED: 5'-AMP-activated protein kinase subunit gamma-2 isoform X2 [Lepisosteus oculatus]	ko04068//FoxO signaling pathway//Signal transduction//Environmental Information Processing;ko04910//Insulin signaling pathway//Endocrine system//Organismal Systems;ko04920//Adipocytokine signaling pathway//Endocrine system//Organismal Systems	-	-	-
Unigene0001205	0.666666666666667	2.66666666666667	0.0518	0.0481	0.0000	0.0000	0.1540	0.1448	0.0333	0.0996	1.58062356499682	0.49961695680647	1	no	-	--	-	-	-	-
Unigene0001206	3.66666666666667	4	0.3707	0.1378	0.2159	0.2015	0.2205	0.2074	0.241466666666667	0.2098	-0.202809367651746	0.999999999999995	1	no	-	--	-	-	-	-
Unigene0001207	23.3333333333333	57.6666666666667	0.0388	0.9558	0.2119	0.4878	1.2842	0.6377	0.402166666666667	0.803233333333333	0.998025631128628	0.215508094197216	0.937022802360026	no	myadm	PREDICTED: myeloid-associated differentiation marker-like [Sinocyclocheilus anshuiensis]	-	-	-	-
Unigene0001208	136	148.333333333333	2.5204	2.2429	1.7181	1.6883	1.4755	2.4372	2.16046666666667	1.867	-0.210621044531931	0.624674554007717	1	no	TPH1	PREDICTED: tryptophan 5-hydroxylase 1 isoform X1 [Sinocyclocheilus rhinocerous]	ko01100//Metabolic pathways//Global and Overview//Metabolism;ko00380//Tryptophan metabolism//Amino acid metabolism//Metabolism	-	GO:0016714//oxidoreductase activity, acting on paired donors, with incorporation or reduction of molecular oxygen, reduced pteridine as one donor, and incorporation of one atom of oxygen;GO:0004497//monooxygenase activity;GO:0046872//metal ion binding;GO:0046914//transition metal ion binding;GO:0005488//binding;GO:0043168//anion binding;GO:0036094//small molecule binding;GO:0031406//carboxylic ac…	GO:0042428//serotonin metabolic process;GO:0008152//metabolic process;GO:0006725//cellular aromatic compound metabolic process;GO:0044699//single-organism process;GO:0006807//nitrogen compound metabolic process;GO:1901564//organonitrogen compound metabolic process;GO:0006520//cellular amino acid metabolic process;GO:0044237//cellular metabolic process;GO:0044238//primary metabolic process;GO:0046…
Unigene0001209	7	8.66666666666667	0.3734	0.9545	0.4079	0.2537	0.2083	1.2402	0.5786	0.5674	-0.0282001726552407	0.999999999999996	1	no	PLAU	PREDICTED: urokinase-type plasminogen activator-like [Sinocyclocheilus anshuiensis]	-	-	GO:0004175//endopeptidase activity;GO:0016787//hydrolase activity;GO:0008233//peptidase activity;GO:0016740//transferase activity;GO:0070011//peptidase activity, acting on L-amino acid peptides;GO:0003824//catalytic activity;GO:0016772//transferase activity, transferring phosphorus-containing groups	GO:0016485//protein processing;GO:0006793//phosphorus metabolic process;GO:0006508//proteolysis;GO:0019538//protein metabolic process;GO:0006796//phosphate-containing compound metabolic process;GO:0009987//cellular process;GO:0044237//cellular metabolic process;GO:0031638//zymogen activation;GO:0010467//gene expression;GO:0071704//organic substance metabolic process;GO:0043170//macromolecule meta…
Unigene0001210	20.3333333333333	20.6666666666667	1.4263	2.8074	0.4887	0.3420	2.3709	1.0560	1.57413333333333	1.2563	-0.325376730329917	0.700785172743039	1	no	-	PREDICTED: uncharacterized protein LOC107552172 isoform X1 [Sinocyclocheilus grahami]	-	-	-	-
Unigene0001211	11.6666666666667	15.3333333333333	0.8459	0.4163	0.3261	0.4057	0.8881	0.3479	0.529433333333333	0.547233333333333	0.0477070806702985	0.95804900001969	1	no	Tf2-6	PREDICTED: uncharacterized mitochondrial protein AtMg00860-like [Sinocyclocheilus anshuiensis]	-	-	-	-
Unigene0001212	326	357.333333333333	2.3146	2.5525	3.2994	1.5394	2.6184	3.3055	2.72216666666667	2.48776666666667	-0.129904221474762	0.747231549224423	1	no	RUNX1T1	PREDICTED: protein CBFA2T1 isoform X1 [Sinocyclocheilus anshuiensis]	-	-	-	-
Unigene0001213	212.333333333333	139	24.5982	11.2479	9.9636	8.4376	2.8821	11.6692	15.2699	7.66296666666667	-0.994715678986542	0.0689347408593994	0.766600415817556	no	-	--	-	-	-	-
Unigene0001214	61.3333333333333	52	1.6631	2.1868	2.5106	1.4332	1.6289	1.4181	2.12016666666667	1.4934	-0.505577043599111	0.279721645213688	0.971731642265969	no	-	--	-	-	-	-
Unigene0001215	0	0	0.0000	0.0000	0.0000	0.0000	0.0000	0.0000	0.001	0.001	0	notest	notest	notest	-	PREDICTED: uncharacterized protein LOC107656688 [Sinocyclocheilus anshuiensis]	-	-	-	-
Unigene0001216	1118.33333333333	1321.33333333333	4.4807	4.8659	5.2108	4.7257	4.7570	4.6029	4.85246666666667	4.6952	-0.0475316893556153	0.88135400601041	1	no	GLTSCR1	PREDICTED: glioma tumor suppressor candidate region gene 1 protein-like isoform X3 [Sinocyclocheilus rhinocerous]	-	-	-	-
Unigene0001217	57031	55655.3333333333	495.2140	362.7893	305.4171	346.4951	151.0082	391.9060	387.8068	296.469766666667	-0.387453111196797	0.305721309704604	0.980949605859751	no	pim2	PREDICTED: serine/threonine-protein kinase pim-2-like [Cyprinus carpio]	-	-	-	-
Unigene0001218	139.333333333333	181.666666666667	4.6182	4.9450	4.0085	3.4141	5.8797	5.0375	4.5239	4.7771	0.0785680381877408	0.853969375930906	1	no	-	--	-	-	-	-
Unigene0001219	70.6666666666667	95.6666666666667	1.0678	3.9700	1.9994	1.5807	3.3182	2.9066	2.34573333333333	2.60183333333333	0.149489534889436	0.788151471647372	1	no	-	--	-	-	-	-
Unigene0001220	9.33333333333333	16.3333333333333	0.7192	0.3085	0.3626	0.2256	1.3989	0.3482	0.463433333333333	0.657566666666667	0.504775351306601	0.560658282330388	1	no	-	--	-	-	-	-
Unigene0001221	120.666666666667	88	3.1321	2.4953	3.6273	1.7228	2.2405	1.6269	3.0849	1.8634	-0.727286325365544	0.0905565855031399	0.810990921293459	no	-	--	-	-	-	-
Unigene0001222	108	82	13.2998	8.0048	9.7637	6.2962	5.0263	7.5463	10.3561	6.2896	-0.719440627302694	0.105891958604022	0.831022620094238	no	-	--	-	-	-	-
Unigene0001223	128.333333333333	467.333333333333	0.6521	7.6319	1.8563	4.8340	15.4529	9.5550	3.3801	9.9473	1.55723905828284	0.0249510045813872	0.573850740546056	no	dhdh	PREDICTED: trans-1,2-dihydrobenzene-1,2-diol dehydrogenase-like [Sinocyclocheilus grahami]	ko00980//Metabolism of xenobiotics by cytochrome P450//Xenobiotics biodegradation and metabolism//Metabolism;ko00040//Pentose and glucuronate interconversions//Carbohydrate metabolism//Metabolism	-	-	GO:0044699//single-organism process;GO:0008152//metabolic process;GO:0044710//single-organism metabolic process
Unigene0001224	59.3333333333333	87	3.8656	1.9279	1.7850	1.6336	2.5241	4.5488	2.52616666666667	2.90216666666667	0.200180547709413	0.719114704282722	1	no	-	--	-	-	-	-
Unigene0001225	167.666666666667	176	9.7379	7.0803	16.1258	11.8461	6.4825	10.7077	10.9813333333333	9.67876666666667	-0.182158107910876	0.688216466806752	1	no	-	--	-	-	-	-
Unigene0001226	728	989	39.3292	29.6898	53.9324	52.9494	38.9474	46.9499	40.9838	46.2822333333333	0.175404726276957	0.625372886449283	1	no	-	--	-	-	-	-
Unigene0001227	22	23.3333333333333	1.1644	1.0406	0.4892	0.5782	0.8992	0.7515	0.898066666666667	0.742966666666667	-0.273525059856928	0.659702133566377	1	no	-	--	-	-	-	-
Unigene0001228	20.3333333333333	27.3333333333333	0.7909	2.1320	1.2670	1.3436	2.1763	1.1061	1.39663333333333	1.542	0.142849454322919	0.833786445843546	1	no	-	PREDICTED: golgin subfamily A member 6-like protein 22 [Kryptolebias marmoratus]	-	-	-	-
Unigene0001229	429.666666666667	392.666666666667	2.0862	2.0092	2.8048	1.3663	2.1309	1.7663	2.30006666666667	1.7545	-0.3906157300711	0.287366923283706	0.975689577969232	no	NHS	PREDICTED: Nance-Horan syndrome protein-like isoform X2 [Sinocyclocheilus rhinocerous]	-	-	-	-
Unigene0001230	102.666666666667	153.666666666667	2.1011	3.1069	3.1758	2.4227	4.0010	4.0068	2.7946	3.47683333333333	0.315132110893715	0.475241480253548	1	no	pol	PREDICTED: uncharacterized protein LOC108184914 [Danio rerio]	-	-	-	-
Unigene0001231	460.333333333333	715.666666666667	26.4493	29.6325	36.6844	50.7595	38.6363	29.6124	30.9220666666667	39.6694	0.359389832316415	0.322929319905978	0.985762684824277	no	glrx3	PREDICTED: glutaredoxin 3-like isoform X3 [Sinocyclocheilus grahami]	-	GO:0005622//intracellular;GO:0044444//cytoplasmic part;GO:0005737//cytoplasm;GO:0044464//cell part;GO:0044424//intracellular part;GO:0005623//cell	GO:0016667//oxidoreductase activity, acting on a sulfur group of donors;GO:0016491//oxidoreductase activity;GO:0015036//disulfide oxidoreductase activity;GO:0003824//catalytic activity	GO:0055065//metal ion homeostasis;GO:0098771//inorganic ion homeostasis;GO:0055080//cation homeostasis;GO:0043170//macromolecule metabolic process;GO:0065007//biological regulation;GO:0044763//single-organism cellular process;GO:0044710//single-organism metabolic process;GO:0055076//transition metal ion homeostasis;GO:0019725//cellular homeostasis;GO:0044238//primary metabolic process;GO:0009987/…
Unigene0001232	55	77.6666666666667	1.0878	0.5417	1.1175	0.6864	1.4157	1.1274	0.915666666666667	1.0765	0.233453909812533	0.658752873075184	1	no	-	--	-	-	-	-
Unigene0001233	15	10	0.6402	1.0069	0.3586	0.3346	0.1831	0.5165	0.668566666666667	0.344733333333333	-0.955590622895996	0.196503323849145	0.924405467029342	no	-	--	-	-	-	-
Unigene0001234	34.3333333333333	21	0.7186	2.0038	1.0773	0.5170	0.7230	0.6502	1.26656666666667	0.630066666666667	-1.00734662457191	0.0851860680482548	0.80010919952018	no	-	PREDICTED: LOW QUALITY PROTEIN: protein NLRC5-like [Sinocyclocheilus anshuiensis]	-	-	-	-
Unigene0001235	24	12	3.5402	0.8226	1.9334	0.6682	0.9507	0.8939	2.09873333333333	0.8376	-1.3251855209553	0.0460882407783939	0.695178732763105	no	-	--	-	-	-	-
Unigene0001236	3163	3817.66666666667	13.5868	13.6561	15.1033	11.1906	16.9347	13.9324	14.1154	14.0192333333333	-0.00986255706770363	0.974837710647866	1	no	Atp11c	PREDICTED: phospholipid-transporting ATPase IG isoform X1 [Sinocyclocheilus rhinocerous]	-	-	-	-
Unigene0001237	5583.66666666667	4343	32.3002	19.9077	21.1627	13.9924	15.9316	15.6430	24.4568666666667	15.189	-0.687212692278415	0.0301080125143782	0.61210905823444	no	pol	Septin-8-A [Larimichthys crocea]	-	-	-	-
Unigene0001238	2.33333333333333	5.33333333333333	0.0000	0.4400	0.4596	0.7506	0.7042	0.3310	0.299866666666667	0.595266666666667	0.989214949188784	0.38381341014654	1	no	-	--	-	-	-	-
Unigene0001239	47	65	1.2097	0.7322	1.4340	1.7586	1.0879	1.0032	1.1253	1.28323333333333	0.189473854077667	0.723152526160669	1	no	-	PREDICTED: RNA-directed DNA polymerase from mobile element jockey-like [Oryzias latipes]	-	-	-	-
Unigene0001240	0	0	0.0000	0.0000	0.0000	0.0000	0.0000	0.0000	0.001	0.001	0	notest	notest	notest	-	PREDICTED: uncharacterized protein C2orf61 homolog [Sinocyclocheilus rhinocerous]	-	-	-	-
Unigene0001241	11.3333333333333	8.66666666666667	0.5326	0.4951	0.6895	0.1206	0.5281	0.4552	0.5724	0.367966666666667	-0.637448590599708	0.409252798126685	1	no	pol	PREDICTED: protein MAATS1 isoform X1 [Danio rerio]	-	-	-	-
Unigene0001242	17.6666666666667	10	1.3041	0.7843	1.3965	0.5734	0.0000	1.0192	1.16163333333333	0.530866666666667	-1.12973329549203	0.173531964770279	0.909722858457125	no	-	--	-	-	-	-
Unigene0001243	189.333333333333	192	6.0404	4.1577	5.8486	5.1914	3.8850	4.1551	5.3489	4.4105	-0.278300014751048	0.48317651735261	1	no	si:ch211-67n3.3	BLOC-1-related complex subunit 7 [Danio rerio]	-	-	-	-
Unigene0001244	9.66666666666667	13.3333333333333	1.1153	0.2221	0.6961	0.5954	1.1849	0.5013	0.677833333333333	0.760533333333333	0.166080896094393	0.859870978656471	1	no	Tmem150c	PREDICTED: transmembrane protein 150C-like [Sinocyclocheilus rhinocerous]	-	-	-	-
Unigene0001245	223.333333333333	221.333333333333	16.0883	13.7822	13.6583	12.1911	10.6961	11.8195	14.5096	11.5689	-0.326756051893848	0.384050610255851	1	no	-	--	-	-	-	-
Unigene0001246	4	2.33333333333333	0.2428	0.4513	0.5304	0.0825	0.0903	0.4244	0.408166666666667	0.199066666666667	-1.0359067033168	0.340506276571383	0.988364039424551	no	-	--	-	-	-	-
Unigene0001247	24.3333333333333	29.6666666666667	2.2921	2.3968	1.5299	1.3628	2.2017	2.4708	2.07293333333333	2.01176666666667	-0.0432107344509464	0.973397552212482	1	no	-	--	-	-	-	-
Unigene0001248	21	26.6666666666667	0.9354	0.9108	0.6487	1.0291	0.9275	0.5606	0.831633333333333	0.839066666666667	0.0128378570674175	1	1	no	-	--	-	-	-	-
Unigene0001249	6.66666666666667	35.3333333333333	0.0000	1.1646	0.0000	0.9791	0.5125	3.1539	0.3882	1.5485	1.99599935984836	0.0905550865468008	0.810990921293459	no	-	--	-	-	-	-
Unigene0001250	614.666666666667	604.333333333333	2.3772	2.8362	1.9254	1.4754	2.3669	1.8060	2.3796	1.88276666666667	-0.337864867145385	0.348234947000432	0.990183685238501	no	AKAP13	PREDICTED: A-kinase anchor protein 13-like isoform X6 [Sinocyclocheilus anshuiensis]	-	-	-	-
Unigene0001251	155.666666666667	150.666666666667	10.2761	7.9993	8.0906	6.4151	5.7315	8.3080	8.78866666666667	6.8182	-0.366253390891002	0.367681872255024	0.996469447253902	no	-	--	-	-	-	-
Unigene0001252	14.6666666666667	17.3333333333333	1.0843	0.6299	0.8883	0.7828	0.8568	0.8530	0.8675	0.830866666666667	-0.0622467786163284	0.957949580231343	1	no	-	--	-	-	-	-
Unigene0001253	68.6666666666667	59.3333333333333	1.2343	4.1372	1.4708	0.9150	2.3088	1.5431	2.28076666666667	1.58896666666667	-0.521429999443941	0.377233128003366	1	no	-	Retrotransposable element Tf2 protein type 3 [Larimichthys crocea]	-	-	-	-
Unigene0001254	14.6666666666667	19	0.6035	0.5609	0.7324	0.6834	0.8602	0.4923	0.632266666666667	0.678633333333333	0.102099132455916	0.918704349572423	1	no	-	--	-	-	-	-
Unigene0001255	45.6666666666667	46.3333333333333	1.9337	2.6651	3.1560	2.0842	2.2810	2.1914	2.58493333333333	2.18553333333333	-0.242141691226874	0.625594691367287	1	no	-	--	-	-	-	-
Unigene0001256	6	8.66666666666667	0.2680	0.6642	0.4553	0.3642	1.0629	0.2498	0.4625	0.558966666666667	0.27330888654764	0.805552857706972	1	no	-	PREDICTED: zinc finger BED domain-containing protein 4 isoform X3 [Danio rerio]	-	-	-	-
Unigene0001257	15	19	0.9595	0.5488	1.2899	0.9027	1.1527	0.9290	0.932733333333333	0.9948	0.0929418312660983	0.920994242723625	1	no	-	--	-	-	-	-
Unigene0001258	3.66666666666667	2.33333333333333	0.3998	0.0000	0.0647	0.0302	0.0330	0.1553	0.154833333333333	0.0728333333333333	-1.08804531688205	0.471637431646068	1	no	-	--	-	-	-	-
Unigene0001259	32	47	0.6416	1.0138	0.9811	0.9373	1.1213	1.1440	0.878833333333333	1.06753333333333	0.280619622171322	0.592114678858424	1	no	-	--	-	-	-	-
Unigene0001260	1626	2014	9.7681	10.4988	9.8957	10.7257	7.9985	11.4546	10.0542	10.0596	0.000774647595976506	0.998683489634721	1	no	MCF2L	PREDICTED: guanine nucleotide exchange factor DBS-like [Sinocyclocheilus grahami]	-	-	-	-
Unigene0001261	371	295.666666666667	3.5141	1.8363	2.8159	2.8391	0.9753	1.3755	2.7221	1.72996666666667	-0.653975827153791	0.152407447025464	0.888215077838103	no	CDH1	PREDICTED: B-cadherin-like [Sinocyclocheilus grahami]	ko04514//Cell adhesion molecules (CAMs)//Signaling molecules and interaction//Environmental Information Processing;ko04520//Adherens junction//Cellular commiunity//Cellular Processes	-	-	-
Unigene0001262	5.33333333333333	0	1.2634	0.0000	0.2123	0.0000	0.0000	0.0000	0.4919	0.001	-8.94222124483597	0.00873579624366943	0.3805921463781	no	-	--	-	-	-	-
Unigene0001263	20.6666666666667	12	1.7355	1.0754	1.6248	0.4492	1.2292	0.4623	1.47856666666667	0.713566666666667	-1.05107916585261	0.109658581737938	0.835638536964064	no	-	--	-	-	-	-
Unigene0001264	31.6666666666667	28	1.6447	2.7516	2.3353	2.3468	1.1008	1.3800	2.24386666666667	1.6092	-0.47964330869326	0.382300298332394	1	no	-	--	-	-	-	-
Unigene0001265	28	17.6666666666667	2.9571	0.2843	3.8610	0.5543	0.5308	2.7094	2.36746666666667	1.26483333333333	-0.904396819055651	0.300592011191426	0.97967753014196	no	-	--	-	-	-	-
Unigene0001266	133	119	3.2306	5.3307	4.0175	3.0337	4.0221	2.1574	4.19293333333333	3.07106666666667	-0.449220061195543	0.308853910338697	0.981537859477186	no	-	--	-	-	-	-
Unigene0001267	1	1	0.3576	0.0000	0.0000	0.0000	0.1773	0.0834	0.1192	0.0869	-0.455956153647761	0.999999999999993	1	no	-	--	-	-	-	-
Unigene0001268	826	4310.33333333333	4.4161	75.8430	9.1543	54.0923	201.2153	114.8611	29.8044666666667	123.389566666667	2.04961994858615	0.00879224604261878	0.38190463214702	no	APOC2	apolipoprotein C-II [Hemibarbus mylodon]	-	-	-	-
Unigene0001269	397.666666666667	403.333333333333	2.7537	2.5893	2.9404	2.0784	2.2568	2.5317	2.76113333333333	2.28896666666667	-0.270564102775045	0.436189141245851	1	no	ATF2	PREDICTED: cyclic AMP-dependent transcription factor ATF-2-like [Sinocyclocheilus anshuiensis]	ko04010//MAPK signaling pathway//Signal transduction//Environmental Information Processing;ko04261//Adrenergic signaling in cardiomyocytes//Circulatory system//Organismal Systems	-	-	-
Unigene0001270	55.6666666666667	55.6666666666667	1.1446	1.0391	1.5894	0.9948	0.9502	1.1912	1.2577	1.0454	-0.266732771855081	0.571585870043217	1	no	-	--	-	-	-	-
Unigene0001271	15.3333333333333	12.6666666666667	0.5307	0.4385	1.2452	0.4407	0.4824	0.6597	0.738133333333333	0.5276	-0.484436877664023	0.476479922507554	1	no	-	--	-	-	-	-
Unigene0001272	67.6666666666667	72.3333333333333	1.7376	0.7022	1.9070	1.3689	0.5805	1.8665	1.44893333333333	1.27196666666667	-0.187930353131331	0.743628443290126	1	no	bsx	brain-specific homeobox protein homolog [Danio rerio]	-	GO:0043226//organelle;GO:0043229//intracellular organelle;GO:0005623//cell;GO:0005622//intracellular;GO:0043231//intracellular membrane-bounded organelle;GO:0044424//intracellular part;GO:0043227//membrane-bounded organelle;GO:0044464//cell part	GO:0003677//DNA binding;GO:0001071//nucleic acid binding transcription factor activity;GO:0005488//binding;GO:1901363//heterocyclic compound binding;GO:0097159//organic cyclic compound binding;GO:0003676//nucleic acid binding	GO:1901576//organic substance biosynthetic process;GO:0009987//cellular process;GO:0046483//heterocycle metabolic process;GO:0006807//nitrogen compound metabolic process;GO:0009058//biosynthetic process;GO:0090304//nucleic acid metabolic process;GO:1901360//organic cyclic compound metabolic process;GO:0006139//nucleobase-containing compound metabolic process;GO:0044238//primary metabolic process;…
Unigene0001273	17.6666666666667	23.3333333333333	0.9491	1.0292	1.5550	1.2898	1.1764	1.4379	1.17776666666667	1.30136666666667	0.143973758146325	0.82610543979539	1	no	-	--	-	-	-	-
Unigene0001274	21.3333333333333	12	1.2312	1.0013	0.7097	0.5229	0.3434	0.4304	0.980733333333333	0.432233333333333	-1.18205057777107	0.0515735214491192	0.716958925334929	no	-	--	-	-	-	-
Unigene0001275	240.666666666667	234.666666666667	29.6082	19.4089	17.8527	16.4475	7.6485	27.0225	22.2899333333333	17.0395	-0.387509299324911	0.419005173512233	1	no	-	--	-	-	-	-
Unigene0001276	243	232.333333333333	32.6080	25.2363	27.1358	18.8104	14.5496	31.8273	28.3267	21.7291	-0.382534120005836	0.360913085873247	0.995153554830312	no	-	--	-	-	-	-
Unigene0001277	43523.3333333333	37039.3333333333	325.2019	233.5121	229.6567	164.1201	77.8164	288.6295	262.790233333333	176.855333333333	-0.571341932233101	0.168262236578503	0.903655422973518	no	pim2	PREDICTED: RNA-directed DNA polymerase from mobile element jockey-like [Sinocyclocheilus anshuiensis]	-	-	-	-
Unigene0001278	59	74	3.7987	3.0438	3.2907	3.9162	2.4840	3.8010	3.37773333333333	3.4004	0.00964903104851525	0.987158914740557	1	no	-	--	-	-	-	-
Unigene0001279	10.6666666666667	19.6666666666667	0.8750	2.0332	0.3186	2.1552	0.9760	1.3766	1.0756	1.5026	0.482319347054515	0.520289859868591	1	no	-	--	-	-	-	-
Unigene0001280	21.6666666666667	30	1.9413	0.7733	1.2621	0.7537	2.6811	1.0665	1.32556666666667	1.50043333333333	0.178769989670071	0.812823296586132	1	no	-	--	-	-	-	-
Unigene0001281	8.66666666666667	9.66666666666667	1.2506	0.8137	0.8196	0.7648	0.7440	1.0493	0.9613	0.8527	-0.172948477157369	0.871680066974703	1	no	-	--	-	-	-	-
Unigene0001282	2169.66666666667	2276.33333333333	15.3897	15.4199	14.1385	12.0505	12.9656	13.1129	14.9827	12.7096666666667	-0.237371438554373	0.430105833223084	1	no	-	--	-	-	-	-
Unigene0001283	143	89.6666666666667	18.3144	10.8419	12.2245	6.2962	1.5403	12.5772	13.7936	6.80456666666667	-1.0194238408277	0.0954064243489207	0.817318155024148	no	-	--	-	-	-	-
Unigene0001284	15	23.3333333333333	1.1766	1.4581	1.2137	1.9320	1.0937	1.7825	1.2828	1.60273333333333	0.321238147460517	0.611639223110397	1	no	-	--	-	-	-	-
Unigene0001285	706.666666666667	762	7.8774	7.2578	6.3046	4.9624	5.6105	7.9731	7.1466	6.182	-0.209183387726857	0.551289240067851	1	no	-	PREDICTED: uncharacterized protein LOC107758869 [Sinocyclocheilus rhinocerous]	-	-	-	-
Unigene0001286	1.33333333333333	3.33333333333333	0.1024	0.0952	0.0000	0.1044	0.1143	0.1433	0.0658666666666667	0.120666666666667	0.873406750385893	0.546040374225721	1	no	-	--	-	-	-	-
Unigene0001287	0	0	0.0000	0.0000	0.0000	0.0000	0.0000	0.0000	0.001	0.001	0	notest	notest	notest	-	--	-	-	-	-
Unigene0001288	71.6666666666667	138.666666666667	6.6854	8.6107	3.3381	9.1500	7.3865	11.4193	6.2114	9.3186	0.585194747705815	0.220497999712694	0.940880886627525	no	-	--	-	-	-	-
Unigene0001289	14.3333333333333	14.6666666666667	1.5414	1.2536	0.9119	0.7855	1.1463	1.0778	1.23563333333333	1.0032	-0.300641442529413	0.657810203095511	1	no	-	--	-	-	-	-
Unigene0001290	126	117	3.7297	2.3817	3.2548	2.4762	2.1385	2.4287	3.12206666666667	2.3478	-0.411191827983395	0.328475263939855	0.986799766873732	no	-	PREDICTED: alpha-tubulin N-acetyltransferase 1 isoform X3 [Sinocyclocheilus rhinocerous]	-	-	-	-
Unigene0001291	2.66666666666667	7.33333333333333	0.0440	0.0409	0.0641	0.1495	0.1636	0.0308	0.0496666666666667	0.114633333333333	1.20667678517726	0.247818134920659	0.956137045139247	no	-	PREDICTED: cell surface glycoprotein 1-like [Sinocyclocheilus anshuiensis]	-	-	-	-
Unigene0001292	456.333333333333	299.333333333333	6.6914	8.6848	3.3470	2.5600	4.9425	2.1813	6.24106666666667	3.22793333333333	-0.951181839677269	0.0365243965513695	0.652893839684522	no	CD97	PREDICTED: CD97 antigen-like [Sinocyclocheilus grahami]	-	GO:0016020//membrane;GO:0044425//membrane part;GO:0031224//intrinsic component of membrane	GO:0004872//receptor activity;GO:0043167//ion binding;GO:0004871//signal transducer activity;GO:0043169//cation binding;GO:0046872//metal ion binding;GO:0005488//binding;GO:0060089//molecular transducer activity;GO:0038023//signaling receptor activity	GO:0065007//biological regulation;GO:0050794//regulation of cellular process;GO:0050789//regulation of biological process;GO:0023052//signaling;GO:0007186//G-protein coupled receptor signaling pathway;GO:0044699//single-organism process;GO:0044700//single organism signaling;GO:0044763//single-organism cellular process;GO:0007165//signal transduction;GO:0050896//response to stimulus;GO:0007154//ce…
Unigene0001293	14.6666666666667	47.3333333333333	0.2857	2.1244	0.4161	0.7765	5.2052	1.3983	0.942066666666667	2.46	1.38475725266672	0.0987709865265036	0.820916870576903	no	-	PREDICTED: aryl hydrocarbon receptor repressor-like [Sinocyclocheilus grahami]	-	GO:0005623//cell;GO:0044424//intracellular part;GO:0043229//intracellular organelle;GO:0044464//cell part;GO:0043231//intracellular membrane-bounded organelle;GO:0043227//membrane-bounded organelle;GO:0043226//organelle;GO:0005622//intracellular	GO:0097159//organic cyclic compound binding;GO:1901363//heterocyclic compound binding;GO:0001076//transcription factor activity, RNA polymerase II transcription factor binding;GO:0005488//binding;GO:0000988//transcription factor activity, protein binding;GO:0000989//transcription factor activity, transcription factor binding;GO:0003676//nucleic acid binding	GO:0034654//nucleobase-containing compound biosynthetic process;GO:1901360//organic cyclic compound metabolic process;GO:0008152//metabolic process;GO:0046483//heterocycle metabolic process;GO:0044271//cellular nitrogen compound biosynthetic process;GO:0009987//cellular process;GO:0006139//nucleobase-containing compound metabolic process;GO:0019438//aromatic compound biosynthetic process;GO:00508…
Unigene0001294	48.3333333333333	55	1.6249	1.7562	1.4308	1.8487	1.2927	1.2419	1.60396666666667	1.4611	-0.134589238431643	0.780296168007953	1	no	-	PREDICTED: zinc finger BED domain-containing protein 1-like [Cyprinus carpio]	-	-	-	-
Unigene0001295	3306.33333333333	5007	13.6622	17.6666	16.7193	21.6836	20.2909	17.5137	16.0160333333333	19.8294	0.308124143118572	0.30858924852876	0.981537859477186	no	SF1	PREDICTED: splicing factor 1 isoform X1 [Danio rerio]	-	-	GO:1901363//heterocyclic compound binding;GO:0043167//ion binding;GO:0003676//nucleic acid binding;GO:0046914//transition metal ion binding;GO:0097159//organic cyclic compound binding;GO:0005488//binding;GO:0043169//cation binding;GO:0046872//metal ion binding	GO:0007275//multicellular organism development;GO:0048731//system development;GO:0043010//camera-type eye development;GO:0044707//single-multicellular organism process;GO:0048856//anatomical structure development;GO:0007423//sensory organ development;GO:0032502//developmental process;GO:0001654//eye development;GO:0032501//multicellular organismal process;GO:0044699//single-organism process;GO:00…
Unigene0001296	20647.6666666667	22906.6666666667	89.7434	76.4186	119.1895	82.5728	94.2975	86.7340	95.1171666666667	87.8681	-0.114366242559068	0.708257467520493	1	no	TDRD6	PREDICTED: tudor domain-containing protein 6-like isoform X3 [Sinocyclocheilus rhinocerous]	-	-	-	-
Unigene0001297	1719.33333333333	1939.66666666667	19.1406	14.2546	15.3735	15.9421	13.9857	14.2954	16.2562333333333	14.7410666666667	-0.141152093124175	0.652917486513571	1	no	phactr1	PREDICTED: phosphatase and actin regulator 1-like isoform X2 [Sinocyclocheilus rhinocerous]	-	-	-	-
Unigene0001298	20.3333333333333	16	0.2785	1.2080	2.9742	0.6938	1.7949	0.7140	1.4869	1.06756666666667	-0.477981458530574	0.565199349746964	1	no	-	--	-	-	-	-
Unigene0001299	3.33333333333333	4.33333333333333	0.2464	0.3435	0.4485	0.4186	0.3665	0.3446	0.346133333333333	0.376566666666667	0.121577416956356	0.99999999999999	1	no	Tf2-6	PREDICTED: RNA-directed DNA polymerase homolog, partial [Danio rerio]	-	-	-	-
Unigene0001300	4.33333333333333	6	0.4058	0.1257	0.2462	0.3676	0.2012	0.2837	0.259233333333333	0.284166666666667	0.132486095352205	1	1	no	Plekhs1	PREDICTED: pleckstrin homology domain-containing family S member 1-like [Sinocyclocheilus anshuiensis]	-	-	-	-
Unigene0001301	43.3333333333333	81	2.5676	2.8861	1.5218	1.4606	2.4867	6.3046	2.32516666666667	3.4173	0.555522773998531	0.345600369072424	0.989755030682007	no	-	PREDICTED: beta-taxilin isoform X1 [Salmo salar]	-	-	-	-
Unigene0001302	121.333333333333	114	2.8211	3.1783	3.0087	2.6139	1.8860	2.3511	3.0027	2.28366666666667	-0.394908257921737	0.339930371193861	0.988364039424551	no	-	PREDICTED: proteoglycan 4-like [Cyprinus carpio]	-	-	-	-
Unigene0001303	5	6.33333333333333	0.7365	0.9583	0.3218	0.9007	0.9858	0.1030	0.6722	0.663166666666667	-0.0195190494480574	1	1	no	-	--	-	-	-	-
Unigene0001304	252	132	6.2463	4.7376	1.9435	1.0201	2.4121	1.8144	4.30913333333333	1.74886666666667	-1.30097743645446	0.00996741824697999	0.401632109097501	no	-	--	-	-	-	-
Unigene0001305	1105.33333333333	1269.33333333333	5.9806	6.9568	7.4893	6.2537	8.0269	5.0882	6.8089	6.45626666666667	-0.0767215767151138	0.819913226407818	1	no	Mdc1	PREDICTED: mediator of DNA damage checkpoint protein 1-like isoform X1 [Sinocyclocheilus rhinocerous]	-	-	-	-
Unigene0001306	4756	7706	68.7704	86.9088	93.8512	127.1085	105.5618	99.8101	83.1768	110.8268	0.414053706893198	0.173511408503638	0.909696054365259	no	Thoc3	THO complex subunit 3 [Danio rerio]	ko03013//RNA transport//Translation//Genetic Information Processing;ko03040//Spliceosome//Transcription//Genetic Information Processing	-	-	-
Unigene0001307	22.6666666666667	12.6666666666667	2.9399	2.9809	2.1407	0.9988	0.8944	1.6819	2.68716666666667	1.1917	-1.17306470897288	0.0520525721031839	0.71890750233552	no	-	--	-	-	-	-
Unigene0001308	29.6666666666667	26.3333333333333	0.6524	1.7584	2.3751	0.7979	1.1643	1.6878	1.5953	1.21666666666667	-0.390893788501949	0.537331067947754	1	no	-	--	-	-	-	-
Unigene0001309	34.3333333333333	30.6666666666667	1.6826	1.1450	0.1313	0.2450	0.3575	1.3446	0.9863	0.649033333333333	-0.603733959025015	0.464981719740376	1	no	POL	PREDICTED: gypsy retrotransposon integrase-like protein 1 [Danio rerio]	-	-	-	-
Unigene0001310	142	105	11.4977	9.6989	14.0005	5.9086	4.1674	11.2822	11.7323666666667	7.1194	-0.720666499090072	0.128006571307703	0.859678565738205	no	-	--	-	-	-	-
[truncated: 72,139 more rows]
