# Supplementary material for: Comparative Analysis of miRNA-mRNA Regulation in the Testes of Gobiocypris rarus following 17α-Methyltestosterone Exposure
Source: Int J Mol Sci. 2023 Feb 20;24(4):4239. doi: 10.3390/ijms24044239 (PMC9968023; doi:10.3390/ijms24044239)
Supplement: Supplementary file 1 [file ijms-24-04239-s001.zip › Table S3-MT25-M-VS-MT100-M.annot.xls]

GeneID	MT25-M_count	MT100-M_count	MT25-M1_rpkm	MT25-M2_rpkm	MT25-M3_rpkm	MT100-M1_rpkm	MT100-M2_rpkm	MT100-M3_rpkm	MT25-M_rpkm	MT100-M_rpkm	log2 Ratio(MT100-M/MT25-M)	Pvalue	FDR	significant	Symbol	Description	Pathway	GO Component	GO Function	GO Process
Unigene0000001	6.66666666666667	14.3333333333333	0.8498	0.4388	0.4125	0.8824	0.8529	0.9417	0.567033333333333	0.892333333333333	0.6541491859471	0.382010859602303	1	no	Npr1	PREDICTED: atrial natriuretic peptide receptor 1-like [Cyprinus carpio]	ko04270//Vascular smooth muscle contraction//Circulatory system//Organismal Systems;ko00230//Purine metabolism//Nucleotide metabolism//Metabolism	GO:0031224//intrinsic component of membrane;GO:0016020//membrane;GO:0044425//membrane part	GO:0005488//binding;GO:0016772//transferase activity, transferring phosphorus-containing groups;GO:0036094//small molecule binding;GO:0001883//purine nucleoside binding;GO:0009975//cyclase activity;GO:0016301//kinase activity;GO:1901363//heterocyclic compound binding;GO:0016740//transferase activity;GO:0016829//lyase activity;GO:0032549//ribonucleoside binding;GO:0003824//catalytic activity;GO:00…	GO:0009152//purine ribonucleotide biosynthetic process;GO:1901135//carbohydrate derivative metabolic process;GO:0006164//purine nucleotide biosynthetic process;GO:0006753//nucleoside phosphate metabolic process;GO:1901566//organonitrogen compound biosynthetic process;GO:0044711//single-organism biosynthetic process;GO:1901293//nucleoside phosphate biosynthetic process;GO:0044237//cellular metabol…
Unigene0000002	21.3333333333333	18	1.3184	1.2254	0.8727	0.5601	0.4060	1.1207	1.13883333333333	0.6956	-0.711226788334253	0.276335980324609	0.984053426333084	no	-	--	-	-	-	-
Unigene0000003	12	12.3333333333333	1.0852	0.6207	0.9118	0.8322	0.7541	0.4683	0.872566666666667	0.684866666666667	-0.349442217502591	0.616478886860976	1	no	Gpr64	PREDICTED: cell wall protein DAN4-like [Sinocyclocheilus anshuiensis]	-	-	-	-
Unigene0000004	1820.66666666667	2614	14.9090	15.9482	17.6854	13.2300	19.8130	20.7938	16.1808666666667	17.9456	0.149341277256056	0.658007632689879	1	no	PDLIM5	PDZ and LIM domain 5 isoform 2 [Danio rerio]	-	-	GO:0043169//cation binding;GO:0005488//binding;GO:0043167//ion binding	-
Unigene0000005	16	17	0.3778	0.6522	1.1005	0.8744	0.6907	0.2692	0.710166666666667	0.611433333333333	-0.215962440327227	0.754028471812149	1	no	ZCCHC24	Zinc finger CCHC domain-containing protein 24 [Dicentrarchus labrax]	-	-	GO:0003723//RNA binding;GO:0005488//binding;GO:0097159//organic cyclic compound binding;GO:0003676//nucleic acid binding;GO:1901363//heterocyclic compound binding;GO:0046872//metal ion binding;GO:0043169//cation binding;GO:0043167//ion binding	-
Unigene0000006	5118.66666666667	4859	23.2279	16.5443	18.1072	6.2055	10.9052	23.7537	19.2931333333333	13.6214666666667	-0.502205414417346	0.246192230683537	0.962856317151058	no	EML6	PREDICTED: echinoderm microtubule-associated protein-like 6 isoform X3 [Sinocyclocheilus grahami]	-	-	-	-
Unigene0000007	45.6666666666667	71	1.6665	3.0979	0.1379	4.6725	0.0855	0.2833	1.6341	1.68043333333333	0.040337035728851	0.969686103885384	1	no	-	--	-	-	-	-
Unigene0000008	67	78.3333333333333	1.2523	1.0945	0.9663	0.7803	1.0553	1.0836	1.10436666666667	0.973066666666667	-0.18260869321149	0.698343911746421	1	no	-	PREDICTED: tripartite motif-containing protein 35-like [Sinocyclocheilus grahami]	-	-	-	-
Unigene0000009	87	89	0.9872	1.4418	1.9804	1.9205	1.2739	0.3768	1.4698	1.1904	-0.304173425109546	0.605776563428098	1	no	-	--	-	-	-	-
Unigene0000010	11.6666666666667	13.3333333333333	1.8723	0.3481	0.7498	0.7000	0.6342	1.1088	0.990066666666667	0.814333333333333	-0.281906215331141	0.749139079621154	1	no	-	TCR beta variable region, partial [Ictalurus punctatus]	-	-	-	-
Unigene0000011	445.666666666667	625.666666666667	8.2751	8.3017	6.8368	10.7085	8.0710	5.8777	7.80453333333333	8.21906666666667	0.0746622051194012	0.847229251956945	1	no	-	--	-	-	-	-
Unigene0000012	25.3333333333333	16.3333333333333	1.1862	0.6891	2.6993	1.6630	0.6697	0.0462	1.52486666666667	0.792966666666667	-0.943350973041275	0.287252471201672	0.988236094556661	no	-	--	-	-	-	-
Unigene0000013	19.6666666666667	25	0.8785	0.5444	1.0307	1.1556	0.8818	0.3955	0.817866666666667	0.810966666666667	-0.0122230496200271	0.999999999999992	1	no	-	PREDICTED: disks large homolog 5-like [Sinocyclocheilus grahami]	-	-	-	-
Unigene0000014	26	20.3333333333333	2.1640	1.2643	0.9454	1.4254	0.6981	0.3469	1.4579	0.823466666666667	-0.82410960899671	0.215012217795656	0.942998280206874	no	-	--	-	-	-	-
Unigene0000015	353.333333333333	664	12.2492	11.2406	2.3054	25.9522	3.6922	3.2032	8.5984	10.9492	0.348685332022175	0.635103860904908	1	no	Samsn1	PREDICTED: SAM domain-containing protein SAMSN-1-like isoform X3 [Sinocyclocheilus anshuiensis]	-	-	-	-
Unigene0000016	323	521	3.7387	2.0583	2.4292	2.2399	3.4927	4.2070	2.74206666666667	3.3132	0.272961646603177	0.513648587564549	1	no	C3orf58	PREDICTED: deleted in autism protein 1 homolog [Sinocyclocheilus anshuiensis]	-	-	-	-
Unigene0000017	110.333333333333	108.333333333333	4.1035	3.8141	4.7743	5.1413	2.0817	2.1687	4.23063333333333	3.13056666666667	-0.434449829213095	0.384987266411131	1	no	-	--	-	-	-	-
Unigene0000018	448	561.333333333333	4.9392	5.7015	4.9307	6.1135	5.5371	3.2362	5.19046666666667	4.96226666666667	-0.0648649887156257	0.869279940393008	1	no	GATSL3	GATS-like protein 3 [Danio rerio]	-	-	-	-
Unigene0000019	2.33333333333333	30.6666666666667	0.2260	0.2800	0.0000	3.8481	0.3402	0.1878	0.168666666666667	1.4587	3.11243641607258	0.00906140143483797	0.377833926265722	no	-	pol-like protein [Tetraodon nigroviridis]	ko04080//Neuroactive ligand-receptor interaction//Signaling molecules and interaction//Environmental Information Processing	-	-	-
Unigene0000020	27.3333333333333	21	1.3156	1.3393	1.7335	0.9368	1.3204	0.4296	1.4628	0.8956	-0.707806098488771	0.234834244287389	0.956465357694191	no	-	--	-	-	-	-
Unigene0000021	6	15.6666666666667	0.0000	0.5924	0.7292	1.7018	0.9595	0.1703	0.440533333333333	0.943866666666667	1.09933188867299	0.2770250419471	0.984102981257738	no	-	--	-	-	-	-
Unigene0000022	1673.66666666667	1654	9.9549	8.8789	9.1411	5.6217	5.5998	9.4895	9.32496666666667	6.90366666666667	-0.433735760469402	0.221058351894096	0.947656116456924	no	fgfr1a	PREDICTED: LOW QUALITY PROTEIN: fibroblast growth factor receptor 1-A-like [Cyprinus carpio]	ko04010//MAPK signaling pathway//Signal transduction//Environmental Information Processing;ko04810//Regulation of actin cytoskeleton//Cell motility//Cellular Processes;ko04520//Adherens junction//Cellular commiunity//Cellular Processes	GO:0043226//organelle;GO:0043227//membrane-bounded organelle;GO:0044425//membrane part;GO:0005622//intracellular;GO:0005623//cell;GO:0044424//intracellular part;GO:0016020//membrane;GO:0043229//intracellular organelle;GO:0044444//cytoplasmic part;GO:0005737//cytoplasm;GO:0043231//intracellular membrane-bounded organelle;GO:0031982//vesicle;GO:0044464//cell part;GO:0031224//intrinsic component of …	GO:0001883//purine nucleoside binding;GO:0004888//transmembrane signaling receptor activity;GO:0019199//transmembrane receptor protein kinase activity;GO:0032549//ribonucleoside binding;GO:0019838//growth factor binding;GO:0097367//carbohydrate derivative binding;GO:0004714//transmembrane receptor protein tyrosine kinase activity;GO:0016772//transferase activity, transferring phosphorus-containin…	GO:0048646//anatomical structure formation involved in morphogenesis;GO:0009653//anatomical structure morphogenesis;GO:0050790//regulation of catalytic activity;GO:0048736//appendage development;GO:0050789//regulation of biological process;GO:0065009//regulation of molecular function;GO:0009888//tissue development;GO:0045859//regulation of protein kinase activity;GO:0043405//regulation of MAP kin…
Unigene0000023	11.6666666666667	12.6666666666667	0.6498	1.1217	1.0139	0.8676	1.2578	0.2893	0.928466666666667	0.8049	-0.206040560874565	0.819758977137876	1	no	-	--	-	-	-	-
Unigene0000024	1331.66666666667	2020	4.5384	7.6409	5.7118	9.9676	5.8466	4.6680	5.9637	6.8274	0.195128592564095	0.616247416382298	1	no	myo1c	PREDICTED: unconventional myosin-Ic-like [Cyprinus carpio]	-	-	-	-
Unigene0000025	407.666666666667	320.666666666667	5.2132	2.4905	4.2369	2.2563	2.8694	2.0896	3.9802	2.4051	-0.72674404611768	0.0800874149350976	0.755015404262478	no	-	--	-	-	-	-
Unigene0000026	3306.33333333333	4011.33333333333	19.4451	22.8116	23.4160	23.3797	20.1563	17.5051	21.8909	20.3470333333333	-0.105512809240839	0.73757693458175	1	no	Uso1	PREDICTED: general vesicular transport factor p115 isoform X3 [Sinocyclocheilus anshuiensis]	-	GO:0012505//endomembrane system;GO:0044424//intracellular part;GO:0044422//organelle part;GO:0005623//cell;GO:0044464//cell part;GO:0044446//intracellular organelle part;GO:0005794//Golgi apparatus;GO:0043226//organelle;GO:0043229//intracellular organelle;GO:0044444//cytoplasmic part;GO:0043227//membrane-bounded organelle;GO:0043231//intracellular membrane-bounded organelle;GO:0005737//cytoplasm;…	-	GO:0061024//membrane organization;GO:1902589//single-organism organelle organization;GO:0016050//vesicle organization;GO:0046907//intracellular transport;GO:0044801//single-organism membrane fusion;GO:0048193//Golgi vesicle transport;GO:0044765//single-organism transport;GO:0071840//cellular component organization or biogenesis;GO:0016043//cellular component organization;GO:0051649//establishment…
Unigene0000027	22	17.6666666666667	0.9206	1.7826	1.6199	0.7648	1.2127	0.7651	1.44103333333333	0.9142	-0.656521983615251	0.280963147325167	0.985174552616068	no	-	--	-	-	-	-
Unigene0000028	20.6666666666667	32.6666666666667	0.3402	1.7615	0.5661	0.8780	1.3534	0.9693	0.889266666666667	1.0669	0.262736945725528	0.71385399928799	1	no	-	--	-	-	-	-
Unigene0000029	48	60.6666666666667	1.0057	1.0015	0.9939	0.9698	1.3699	0.6120	1.00036666666667	0.9839	-0.0239452933472001	0.971702221330906	1	no	-	--	-	-	-	-
Unigene0000030	8.66666666666667	14.3333333333333	0.0789	0.3667	1.1491	0.8358	0.4158	0.9346	0.531566666666667	0.728733333333333	0.455140343860237	0.65267856260063	1	no	-	--	-	-	-	-
Unigene0000031	531.333333333333	637.333333333333	12.4163	7.5022	6.1818	6.6488	7.3075	8.9638	8.7001	7.64003333333333	-0.18745305083941	0.637101154699255	1	no	-	PREDICTED: leucine-rich repeat and IQ domain-containing protein 3 isoform X1 [Danio rerio]	-	-	-	-
Unigene0000032	12	12	0.7612	0.4354	0.6395	0.2189	1.1019	0.1825	0.612033333333333	0.5011	-0.288511691171854	0.725413983163349	1	no	pol	PREDICTED: RNA-directed DNA polymerase from mobile element jockey-like [Poecilia formosa]	-	-	-	-
Unigene0000033	859	881.666666666667	7.4591	10.8998	9.5141	7.9148	9.2232	5.0789	9.291	7.40563333333333	-0.327210762968051	0.386074476989184	1	no	MKX	PREDICTED: homeobox protein Mohawk-like isoform X2 [Sinocyclocheilus rhinocerous]	-	GO:0043231//intracellular membrane-bounded organelle;GO:0043227//membrane-bounded organelle;GO:0005622//intracellular;GO:0005623//cell;GO:0043229//intracellular organelle;GO:0044424//intracellular part;GO:0044464//cell part;GO:0043226//organelle	GO:0001071//nucleic acid binding transcription factor activity;GO:1901363//heterocyclic compound binding;GO:0003676//nucleic acid binding;GO:0005488//binding;GO:0097159//organic cyclic compound binding	GO:0071704//organic substance metabolic process;GO:0044707//single-multicellular organism process;GO:0032774//RNA biosynthetic process;GO:0009653//anatomical structure morphogenesis;GO:1901362//organic cyclic compound biosynthetic process;GO:1901360//organic cyclic compound metabolic process;GO:0044249//cellular biosynthetic process;GO:0044699//single-organism process;GO:0044237//cellular metabol…
Unigene0000034	62	56.3333333333333	2.2182	1.4771	1.7116	1.1552	1.8941	0.7636	1.8023	1.27096666666667	-0.503912979837501	0.336321210824078	1	no	gag-pol	PREDICTED: RNA-directed DNA polymerase from mobile element jockey-like [Danio rerio]	-	-	-	-
Unigene0000035	14	11.3333333333333	2.2887	0.7658	0.5333	0.4563	1.5161	0.2283	1.19593333333333	0.733566666666667	-0.705136980164385	0.407664578473726	1	no	-	--	-	-	-	-
Unigene0000036	158.666666666667	201.666666666667	1.9736	2.4801	2.0924	2.8627	2.0680	1.3779	2.18203333333333	2.10286666666667	-0.05331576267598	0.906657750909457	1	no	LGI2	PREDICTED: leucine-rich repeat LGI family member 2-like [Cyprinus carpio]	-	-	-	-
Unigene0000037	16.6666666666667	26.3333333333333	0.2673	1.2421	2.0758	1.4432	2.8166	0.6109	1.19506666666667	1.62356666666667	0.442075524541581	0.57789549738005	1	no	-	PREDICTED: junctional adhesion molecule C-like isoform X2 [Sinocyclocheilus rhinocerous]	-	-	-	-
Unigene0000038	14.6666666666667	15.3333333333333	1.2380	0.9737	1.3869	0.7120	0.7169	1.4247	1.19953333333333	0.9512	-0.334652628445154	0.597391734540734	1	no	-	--	-	-	-	-
Unigene0000039	30	15.3333333333333	1.1934	3.3278	2.5402	0.1716	2.4187	0.4578	2.3538	1.01603333333333	-1.2120440074007	0.135674790473036	0.866863060321507	no	-	--	-	-	-	-
Unigene0000040	29.6666666666667	30.3333333333333	1.0690	1.0351	1.2974	0.9436	1.1065	0.6664	1.13383333333333	0.9055	-0.324422042100606	0.559320270036873	1	no	-	--	-	-	-	-
Unigene0000041	41.6666666666667	46.3333333333333	1.2165	1.1612	1.1970	0.4097	1.5592	1.1477	1.19156666666667	1.03886666666667	-0.197849167330871	0.742287046238624	1	no	-	--	-	-	-	-
Unigene0000042	1.66666666666667	3	0.1731	0.0804	0.1260	0.0000	0.1954	0.3236	0.1265	0.173	0.451634652942414	0.856458985491445	1	no	-	--	-	-	-	-
Unigene0000043	122	136.333333333333	1.8411	1.2796	2.0774	1.4779	1.8854	1.1891	1.7327	1.51746666666667	-0.191357061670545	0.667420940643218	1	no	Bscl2	PREDICTED: seipin-like isoform X2 [Sinocyclocheilus anshuiensis]	-	-	-	-
Unigene0000044	31.3333333333333	30.3333333333333	2.3347	1.9290	1.2278	0.8082	0.9276	2.1023	1.8305	1.27936666666667	-0.516807973558657	0.391382775249207	1	no	-	--	-	-	-	-
Unigene0000045	14.3333333333333	6.66666666666667	1.3777	0.4980	1.0032	0.4769	0.1728	0.3340	0.959633333333333	0.3279	-1.54922736948882	0.0415367021170672	0.621149318837893	no	-	--	-	-	-	-
Unigene0000046	2094	3043.66666666667	62.1806	54.8346	66.7687	55.0629	77.0343	73.9954	61.2613	68.6975333333333	0.165282316211715	0.612813412209082	1	no	POLR2F	PREDICTED: DNA-directed RNA polymerases I, II, and III subunit RPABC2 [Sinocyclocheilus rhinocerous]	ko01100//Metabolic pathways//Global and Overview//Metabolism;ko00230//Purine metabolism//Nucleotide metabolism//Metabolism;ko00240//Pyrimidine metabolism//Nucleotide metabolism//Metabolism;ko04623//Cytosolic DNA-sensing pathway//Immune system//Organismal Systems;ko03020//RNA polymerase//Transcription//Genetic Information Processing	GO:1990234//transferase complex;GO:0044446//intracellular organelle part;GO:0044464//cell part;GO:0070013//intracellular organelle lumen;GO:0044428//nuclear part;GO:0044424//intracellular part;GO:0061695//transferase complex, transferring phosphorus-containing groups;GO:0043234//protein complex;GO:0031974//membrane-enclosed lumen;GO:0044451//nucleoplasm part;GO:0044422//organelle part;GO:0005622/…	GO:0003676//nucleic acid binding;GO:0097159//organic cyclic compound binding;GO:0003899//DNA-directed RNA polymerase activity;GO:0034062//RNA polymerase activity;GO:0016772//transferase activity, transferring phosphorus-containing groups;GO:1901363//heterocyclic compound binding;GO:0016779//nucleotidyltransferase activity;GO:0016740//transferase activity;GO:0003824//catalytic activity;GO:0005488/…	GO:0071704//organic substance metabolic process;GO:0043170//macromolecule metabolic process;GO:0010467//gene expression;GO:0008152//metabolic process
Unigene0000047	2312	2810.66666666667	16.6242	15.2663	17.9366	13.0835	15.4439	17.8334	16.6090333333333	15.4536	-0.104025148152053	0.747043998360635	1	no	fam91a1	protein FAM91A1 [Danio rerio]	-	-	-	-
Unigene0000048	698.666666666667	898.666666666667	6.4041	4.0429	6.2940	4.3592	4.6815	7.3151	5.58033333333333	5.45193333333333	-0.0335833811165439	0.931755384134127	1	no	PTK2B	PREDICTED: protein-tyrosine kinase 2-beta-like [Sinocyclocheilus grahami]	ko04020//Calcium signaling pathway//Signal transduction//Environmental Information Processing;ko04912//GnRH signaling pathway//Endocrine system//Organismal Systems	GO:0043226//organelle;GO:0043229//intracellular organelle;GO:0044424//intracellular part;GO:0005924//cell-substrate adherens junction;GO:0044464//cell part;GO:0030054//cell junction;GO:0005622//intracellular;GO:0030055//cell-substrate junction;GO:0043228//non-membrane-bounded organelle;GO:0005623//cell;GO:0043232//intracellular non-membrane-bounded organelle;GO:0005912//adherens junction;GO:00701…	GO:0097159//organic cyclic compound binding;GO:0016740//transferase activity;GO:0016772//transferase activity, transferring phosphorus-containing groups;GO:0005488//binding;GO:1901363//heterocyclic compound binding;GO:0032549//ribonucleoside binding;GO:0001883//purine nucleoside binding;GO:0003824//catalytic activity;GO:0097367//carbohydrate derivative binding;GO:0016301//kinase activity;GO:00600…	GO:0050789//regulation of biological process;GO:0043170//macromolecule metabolic process;GO:0008152//metabolic process;GO:0044238//primary metabolic process;GO:0006796//phosphate-containing compound metabolic process;GO:0006464//cellular protein modification process;GO:0006793//phosphorus metabolic process;GO:0036211//protein modification process;GO:0065007//biological regulation;GO:0009966//regu…
Unigene0000049	287.666666666667	182.333333333333	4.2667	2.1880	2.8836	1.8181	1.3013	1.2840	3.11276666666667	1.4678	-1.08454203394756	0.0121213270703563	0.417712677612656	no	-	--	-	-	-	-
Unigene0000050	1705.66666666667	1587.66666666667	16.8800	18.5506	10.4138	10.4426	10.0811	10.8776	15.2814666666667	10.4671	-0.545921228737807	0.120341556525879	0.841285841708927	no	Tank	PREDICTED: TRAF family member-associated NF-kappa-B activator-like isoform X1 [Sinocyclocheilus grahami]	ko04622//RIG-I-like receptor signaling pathway//Immune system//Organismal Systems	-	-	-
Unigene0000051	12	15	0.8398	0.7205	0.5174	0.3623	0.7781	0.8054	0.692566666666667	0.6486	-0.0946239282924434	0.910269065798381	1	no	-	--	-	-	-	-
Unigene0000052	42.3333333333333	54.3333333333333	2.6579	3.3196	3.1450	4.0366	2.9386	1.9675	3.04083333333333	2.9809	-0.0287187669161627	0.967924239373856	1	no	Znf235	PREDICTED: zinc finger protein 501-like [Sinocyclocheilus rhinocerous]	-	-	-	-
Unigene0000053	128.333333333333	124	1.8218	1.6546	1.2759	1.4817	1.0364	0.8843	1.5841	1.13413333333333	-0.482073152419893	0.281793869493143	0.985763132798548	no	SYNE1	PREDICTED: nesprin-1-like [Sinocyclocheilus grahami]	-	-	-	-
Unigene0000054	3788.66666666667	4824.66666666667	13.8347	14.0363	16.1051	15.3955	14.5529	13.0734	14.6587	14.3406	-0.0316517778189785	0.918201068942379	1	no	-	Si:ch211-13c6.2 protein, partial [Danio rerio]	-	-	-	-
Unigene0000055	38	30	1.5830	1.1835	0.7768	1.1150	0.3886	0.4934	1.1811	0.665666666666667	-0.827259286270018	0.170485182452766	0.907132446760535	no	-	--	-	-	-	-
Unigene0000056	14	13.3333333333333	1.5980	0.1937	0.8094	0.5195	0.4707	0.8229	0.867033333333333	0.604366666666667	-0.520663367248405	0.508729713230313	1	no	-	--	-	-	-	-
Unigene0000057	298.666666666667	385.333333333333	12.5096	12.5651	13.9573	11.7857	12.2646	14.4014	13.0106666666667	12.8172333333333	-0.0216100053428568	0.956878219253851	1	no	-	--	-	-	-	-
Unigene0000058	13.6666666666667	4.66666666666667	1.4648	0.8509	0.9999	0.5134	0.2067	0.1141	1.1052	0.278066666666667	-1.99080475064442	0.0124168460299763	0.421422715608489	no	-	--	-	-	-	-
Unigene0000059	3860.66666666667	2307.33333333333	71.7234	49.1919	45.4405	19.0386	18.0901	35.6595	55.4519333333333	24.2627333333333	-1.19249567354789	0.00145026151753136	0.165726582659032	no	cfap97	PREDICTED: cilia- and flagella-associated protein 97-like [Sinocyclocheilus anshuiensis]	-	-	-	-
Unigene0000060	14.6666666666667	26.3333333333333	0.8259	0.5278	0.6390	1.2544	0.7383	0.6758	0.664233333333333	0.8895	0.421304481826723	0.501199006417893	1	no	-	--	-	-	-	-
Unigene0000061	10	16.3333333333333	0.4974	0.6357	0.4980	0.4261	0.4680	1.0853	0.5437	0.6598	0.279217949766829	0.685306402428188	1	no	-	--	-	-	-	-
Unigene0000062	11	30	0.0000	0.0000	1.6979	1.7611	1.8617	0.6607	0.565966666666667	1.42783333333333	1.33503859647035	0.250192172446915	0.965714310813944	no	-	--	-	-	-	-
Unigene0000063	1286	1997	10.7207	12.3516	11.1456	15.5245	13.6241	11.2441	11.4059666666667	13.4642333333333	0.239343362079479	0.474665500539697	1	no	pi4k2a	phosphatidylinositol 4-kinase type 2-alpha [Danio rerio]	ko01100//Metabolic pathways//Global and Overview//Metabolism;ko04070//Phosphatidylinositol signaling system//Signal transduction//Environmental Information Processing;ko00562//Inositol phosphate metabolism//Carbohydrate metabolism//Metabolism	GO:0098590//plasma membrane region;GO:0005623//cell;GO:0043005//neuron projection;GO:0031082//BLOC complex;GO:0018995//host;GO:0031982//vesicle;GO:0043227//membrane-bounded organelle;GO:0044216//other organism cell;GO:0044424//intracellular part;GO:0044218//other organism cell membrane;GO:0044279//other organism membrane;GO:0044456//synapse part;GO:0044444//cytoplasmic part;GO:0097458//neuron par…	GO:0032403//protein complex binding;GO:0001883//purine nucleoside binding;GO:0003824//catalytic activity;GO:0032550//purine ribonucleoside binding;GO:0044877//macromolecular complex binding;GO:0016773//phosphotransferase activity, alcohol group as acceptor;GO:0036094//small molecule binding;GO:0016301//kinase activity;GO:0032549//ribonucleoside binding;GO:0005488//binding;GO:0097159//organic cycl…	GO:0006796//phosphate-containing compound metabolic process;GO:0044237//cellular metabolic process;GO:0009987//cellular process;GO:0008152//metabolic process;GO:0006793//phosphorus metabolic process
Unigene0000064	9.66666666666667	8	0.5523	0.2567	1.3406	1.2045	0.1386	0.0574	0.716533333333333	0.466833333333333	-0.618126243051298	0.573013907675239	1	no	-	--	-	-	-	-
Unigene0000065	1165	2249	18.8550	19.0367	23.7418	23.2906	39.1247	30.8726	20.5445	31.0959666666667	0.597975246826606	0.088190283435077	0.771901147751568	no	NSUN5	PREDICTED: probable 28S rRNA (cytosine-C(5))-methyltransferase isoform X3 [Sinocyclocheilus grahami]	-	-	GO:0003824//catalytic activity	GO:0008152//metabolic process
Unigene0000066	10.3333333333333	22	1.1451	0.2504	0.4905	1.0912	0.7606	1.0497	0.628666666666667	0.967166666666667	0.621469252878258	0.373497887821091	1	no	-	--	-	-	-	-
Unigene0000067	11849.6666666667	18861.6666666667	108.5033	116.5108	142.3440	110.0456	175.1099	170.9013	122.4527	152.018933333333	0.312026431885077	0.334659978975579	1	no	PRKAR1A	cAMP-dependent protein kinase type I-alpha regulatory subunit [Danio rerio]	ko04910//Insulin signaling pathway//Endocrine system//Organismal Systems;ko04210//Apoptosis//Cell growth and death//Cellular Processes	GO:0044424//intracellular part;GO:0005623//cell;GO:0005622//intracellular;GO:0044464//cell part	GO:0019207//kinase regulator activity;GO:0030234//enzyme regulator activity;GO:0019887//protein kinase regulator activity;GO:0098772//molecular function regulator	GO:0001932//regulation of protein phosphorylation;GO:0031323//regulation of cellular metabolic process;GO:0032268//regulation of cellular protein metabolic process;GO:0019220//regulation of phosphate metabolic process;GO:0031399//regulation of protein modification process;GO:0042325//regulation of phosphorylation;GO:0065007//biological regulation;GO:0051246//regulation of protein metabolic proces…
Unigene0000068	25	31	1.4136	1.3139	2.2302	1.7615	2.6602	0.5875	1.65256666666667	1.66973333333333	0.0149092407568502	1	1	no	-	--	-	-	-	-
Unigene0000069	1.66666666666667	0.666666666666667	0.1731	0.1609	0.0630	0.0000	0.0000	0.1079	0.132333333333333	0.0359666666666667	-1.8794441425423	0.404763885809357	1	no	-	PREDICTED: nicalin-1-like [Cyprinus carpio]	-	-	-	-
Unigene0000070	2	5.33333333333333	0.0000	0.4249	0.0000	0.5696	0.1147	0.0950	0.141633333333333	0.259766666666667	0.875055472690186	0.589591788088724	1	no	-	PREDICTED: uroplakin-3a-like [Cyprinus carpio]	-	-	-	-
Unigene0000071	58	80.6666666666667	1.7969	1.3143	1.3943	1.9823	1.3527	1.3405	1.50183333333333	1.5585	0.0534334369945672	0.916436667490335	1	no	-	--	-	-	-	-
Unigene0000072	33.6666666666667	60.6666666666667	1.2746	1.3164	1.5125	2.0296	2.3454	1.3831	1.36783333333333	1.91936666666667	0.488737890875144	0.334285103129795	1	no	-	--	-	-	-	-
Unigene0000073	5	10.3333333333333	0.1687	0.2351	0.6140	0.7356	0.4443	0.5257	0.339266666666667	0.568533333333333	0.744825246781975	0.373232966985802	1	no	-	--	-	-	-	-
Unigene0000074	10.6666666666667	16	1.1651	1.5642	0.9426	1.5325	1.4617	1.1298	1.22396666666667	1.37466666666667	0.167517563569926	0.810534987576239	1	no	-	PREDICTED: SLAM family member 9-like [Sinocyclocheilus rhinocerous]	-	-	-	-
Unigene0000075	6	22.6666666666667	0.4696	0.4988	0.1465	1.2958	0.5555	1.0873	0.371633333333333	0.979533333333333	1.39821467914707	0.0512327636074379	0.66067054930085	no	MOB3B	PREDICTED: MOB kinase activator 3B-like [Cyprinus carpio]	-	-	-	-
Unigene0000076	5.66666666666667	6.66666666666667	1.0269	0.0000	0.4079	0.0582	0.2811	0.8729	0.478266666666667	0.404066666666667	-0.243221902749069	0.890147743890162	1	no	-	--	-	-	-	-
Unigene0000077	81.3333333333333	138.666666666667	5.3120	8.1798	3.8102	5.2856	10.9814	6.1778	5.76733333333333	7.4816	0.375442427040182	0.455003758880204	1	no	-	--	-	-	-	-
Unigene0000078	813.666666666667	1025.33333333333	12.5009	11.1064	12.8442	11.9680	13.3301	10.0499	12.1505	11.7826666666667	-0.0443495942531518	0.898949185441577	1	no	TRAM2	PREDICTED: translocating chain-associated membrane protein 2-like isoform X1 [Cyprinus carpio]	-	GO:0016020//membrane;GO:0044425//membrane part;GO:0031224//intrinsic component of membrane	-	-
Unigene0000079	16	24.3333333333333	1.0475	0.6196	2.0803	1.4240	1.4337	1.7216	1.24913333333333	1.52643333333333	0.289237102101363	0.681908271676088	1	no	-	--	-	-	-	-
Unigene0000080	0.666666666666667	3	0.1582	0.0000	0.0000	0.2957	0.0595	0.0986	0.0527333333333333	0.151266666666667	1.52030700919955	0.40792215510469	1	no	-	PREDICTED: uncharacterized protein LOC107583085 [Sinocyclocheilus grahami]	-	-	-	-
Unigene0000081	399.333333333333	417	33.6735	30.7206	28.9189	22.6968	19.5963	30.3512	31.1043333333333	24.2147666666667	-0.361228483747757	0.344486040340687	1	no	-	--	-	-	-	-
Unigene0000082	7.66666666666667	21.3333333333333	0.1744	0.9727	0.5715	1.5215	1.4443	0.7611	0.572866666666667	1.2423	1.11674230916341	0.127678315254221	0.854299815507849	no	-	--	-	-	-	-
Unigene0000083	24.6666666666667	32	0.6408	5.3608	0.2666	2.9661	1.9985	0.8560	2.0894	1.9402	-0.10688333582541	0.923594122004196	1	no	-	--	-	-	-	-
Unigene0000084	85.6666666666667	171.333333333333	1.2857	2.1016	1.5657	1.4779	3.1038	3.0539	1.651	2.5452	0.624438906451091	0.192655713368203	0.927781952289244	no	-	--	-	-	-	-
Unigene0000085	8.66666666666667	6.66666666666667	0.2890	0.6268	1.1224	0.3601	0.3626	0.5405	0.6794	0.421066666666667	-0.690212547740119	0.393975418554279	1	no	-	--	-	-	-	-
Unigene0000086	12.6666666666667	20.6666666666667	0.5188	0.9645	0.6611	0.9698	1.0740	0.6468	0.7148	0.896866666666667	0.327353887402038	0.617809550286253	1	no	-	--	-	-	-	-
Unigene0000087	1.66666666666667	5.66666666666667	0.1726	0.1604	0.0628	0.2689	0.5847	0.1614	0.131933333333333	0.338333333333333	1.35863620991239	0.235406532761789	0.957382567380363	no	-	--	-	-	-	-
Unigene0000088	16	8	0.5629	0.9810	1.2809	0.3069	0.5297	0.3070	0.9416	0.3812	-1.3045662011285	0.0548873767263512	0.672316221851861	no	-	--	-	-	-	-
Unigene0000089	14.6666666666667	19.3333333333333	0.6487	1.2058	0.4723	0.8450	0.5327	0.8455	0.7756	0.741066666666667	-0.065709469627386	0.926301381758723	1	no	-	--	-	-	-	-
Unigene0000090	9.66666666666667	16.6666666666667	0.5260	0.4889	0.6224	1.5159	0.1980	0.3689	0.545766666666667	0.694266666666667	0.347205622980218	0.693138422965266	1	no	-	--	-	-	-	-
Unigene0000091	20	11.6666666666667	1.4227	1.0112	1.8281	1.0950	0.8820	0.0000	1.42066666666667	0.659	-1.1082177220535	0.187542893350308	0.925009760736827	no	-	--	-	-	-	-
Unigene0000092	297	207.333333333333	23.5806	17.1129	15.3658	8.9124	10.9276	9.4907	18.6864333333333	9.7769	-0.934542227324507	0.0210352603378016	0.501942343780078	no	-	--	-	-	-	-
Unigene0000093	35.3333333333333	31	3.2566	3.1159	2.5805	3.1629	2.1630	0.5971	2.98433333333333	1.97433333333333	-0.596043100144244	0.346321876350522	1	no	-	--	-	-	-	-
Unigene0000094	37.3333333333333	54.6666666666667	4.1197	2.2975	2.6665	3.1943	4.0659	2.7963	3.0279	3.35216666666667	0.146776320910743	0.785827862966583	1	no	-	--	-	-	-	-
Unigene0000095	51.6666666666667	74	1.2051	1.6354	0.5616	1.4567	1.2882	0.8113	1.13403333333333	1.1854	0.0639109156996454	0.920417969275278	1	no	tc1a	transposase [Rana pipiens]	-	-	-	-
Unigene0000096	16.3333333333333	21.6666666666667	1.0521	1.7928	0.9576	1.7480	1.4519	0.6012	1.2675	1.26703333333333	-0.000531267578537575	1	1	no	-	--	-	-	-	-
Unigene0000097	497.666666666667	1355	4.2056	9.7992	4.9186	22.5600	7.2857	7.8918	6.3078	12.5791666666667	0.995827528259637	0.0450257508321134	0.635907796147753	no	Rdh7	PREDICTED: retinol dehydrogenase 7-like [Cyprinus carpio]	-	-	GO:0016616//oxidoreductase activity, acting on the CH-OH group of donors, NAD or NADP as acceptor;GO:0016491//oxidoreductase activity;GO:0016614//oxidoreductase activity, acting on CH-OH group of donors;GO:0003824//catalytic activity	GO:0030154//cell differentiation;GO:0007275//multicellular organism development;GO:0071704//organic substance metabolic process;GO:0048762//mesenchymal cell differentiation;GO:0048729//tissue morphogenesis;GO:0002009//morphogenesis of an epithelium;GO:0003008//system process;GO:0014031//mesenchymal cell development;GO:0007507//heart development;GO:0006720//isoprenoid metabolic process;GO:0048513/…
Unigene0000098	55.6666666666667	92	1.2256	0.6277	1.6573	1.6986	1.5627	1.3097	1.1702	1.52366666666667	0.380792194950975	0.455428724000255	1	no	GDPD1	PREDICTED: glycerophosphodiester phosphodiesterase domain-containing protein 1-like isoform X2 [Sinocyclocheilus rhinocerous]	-	-	GO:0016787//hydrolase activity;GO:0003824//catalytic activity;GO:0016788//hydrolase activity, acting on ester bonds;GO:0042578//phosphoric ester hydrolase activity;GO:0008081//phosphoric diester hydrolase activity	GO:0044238//primary metabolic process;GO:0044763//single-organism cellular process;GO:0044710//single-organism metabolic process;GO:0044699//single-organism process;GO:0006066//alcohol metabolic process;GO:0044237//cellular metabolic process;GO:0019751//polyol metabolic process;GO:0009987//cellular process;GO:1901615//organic hydroxy compound metabolic process;GO:0044723//single-organism carbohyd…
Unigene0000099	1916.33333333333	2026.66666666667	17.5010	19.1825	20.3327	13.1953	13.7104	18.9969	19.0054	15.3008666666667	-0.312796017525659	0.349049538144839	1	no	GPSM2	PREDICTED: G-protein-signaling modulator 2-like isoform X1 [Sinocyclocheilus anshuiensis]	-	-	GO:0030234//enzyme regulator activity;GO:0098772//molecular function regulator;GO:0060589//nucleoside-triphosphatase regulator activity	GO:0040001//establishment of mitotic spindle localization;GO:0044699//single-organism process;GO:0051716//cellular response to stimulus;GO:1902580//single-organism cellular localization;GO:0007049//cell cycle;GO:0007154//cell communication;GO:0050794//regulation of cellular process;GO:0000278//mitotic cell cycle;GO:0071840//cellular component organization or biogenesis;GO:0051293//establishment o…
Unigene0000100	14	15.6666666666667	0.5739	0.4445	0.6964	0.3873	0.5400	0.5664	0.5716	0.4979	-0.199149901029767	0.783089194621633	1	no	-	--	-	-	-	-
Unigene0000101	19	22.6666666666667	1.5320	0.7495	1.6440	1.2560	1.1533	1.2063	1.3085	1.2052	-0.118641346340934	0.869970479367829	1	no	-	--	-	-	-	-
Unigene0000102	81	83	1.4590	0.5365	1.3543	1.0689	0.7000	0.8395	1.1166	0.869466666666667	-0.360909837104484	0.486076805874457	1	no	Cers1	PREDICTED: ceramide synthase 1-like [Sinocyclocheilus anshuiensis]	ko01100//Metabolic pathways//Global and Overview//Metabolism;ko00600//Sphingolipid metabolism//Lipid metabolism//Metabolism	-	-	-
Unigene0000103	1240.33333333333	2019	10.8802	11.7686	17.5807	12.3924	21.2135	18.4219	13.4098333333333	17.3426	0.371028896855433	0.313608263333258	0.996874991911097	no	Pnpla2	PREDICTED: patatin-like phospholipase domain-containing protein 2 [Sinocyclocheilus anshuiensis]	ko01100//Metabolic pathways//Global and Overview//Metabolism;ko00561//Glycerolipid metabolism//Lipid metabolism//Metabolism	-	-	-
Unigene0000104	9.66666666666667	10.3333333333333	1.2488	1.0714	0.2798	1.4364	0.0000	0.4192	0.866666666666667	0.618533333333333	-0.486625871953344	0.658657386582629	1	no	-	--	-	-	-	-
Unigene0000105	5.66666666666667	6.33333333333333	0.4407	0.0819	0.7060	0.1647	0.3317	0.6044	0.409533333333333	0.366933333333333	-0.158462913261823	0.925248276052557	1	no	-	--	-	-	-	-
Unigene0000106	78.6666666666667	70	15.1687	11.3405	8.4040	8.5265	7.8192	6.5779	11.6377333333333	7.6412	-0.606938966815508	0.205750062346411	0.936967250351197	no	-	--	-	-	-	-
Unigene0000107	20.3333333333333	32.3333333333333	3.0368	2.2090	1.9228	1.8098	2.3854	4.1976	2.38953333333333	2.7976	0.227460808224164	0.717004156358314	1	no	-	--	-	-	-	-
Unigene0000108	345.333333333333	454	23.7839	19.0528	21.6351	14.3739	16.9897	32.1902	21.4906	21.1846	-0.0206898736852841	0.963299053549207	1	no	-	--	-	-	-	-
Unigene0000109	790.666666666667	860	64.5916	42.3169	58.7472	35.1327	36.3304	64.1323	55.2185666666667	45.1984666666667	-0.28887960889559	0.459263534963197	1	no	-	--	-	-	-	-
Unigene0000110	83.6666666666667	59.6666666666667	0.9318	1.8959	2.4388	1.1140	0.8151	1.0204	1.7555	0.983166666666667	-0.836374087773311	0.103407535749361	0.807895321922117	no	-	--	-	-	-	-
Unigene0000111	36.3333333333333	32.3333333333333	0.9932	1.0155	1.1089	0.8664	0.4486	0.7636	1.0392	0.692866666666667	-0.584823679932894	0.274506210500867	0.983839344944986	no	-	--	-	-	-	-
Unigene0000112	9.33333333333333	9	1.0506	0.4438	0.8345	0.8926	0.2876	0.4763	0.7763	0.552166666666667	-0.491510489972092	0.560533299248493	1	no	-	--	-	-	-	-
Unigene0000113	11.3333333333333	8	1.6899	0.8726	0.4102	0.0585	0.2827	1.1119	0.9909	0.484366666666667	-1.03263988584371	0.282826494180267	0.986673001525219	no	-	--	-	-	-	-
Unigene0000114	32.3333333333333	41	1.1702	1.2042	1.1564	0.6770	1.8246	1.0160	1.17693333333333	1.17253333333333	-0.00540366517317673	1	1	no	GABRG1	PREDICTED: gamma-aminobutyric acid receptor subunit gamma-1-like [Sinocyclocheilus grahami]	ko04080//Neuroactive ligand-receptor interaction//Signaling molecules and interaction//Environmental Information Processing	GO:0044425//membrane part;GO:0016020//membrane;GO:0031224//intrinsic component of membrane	GO:0005215//transporter activity;GO:0022838//substrate-specific channel activity;GO:0099600//transmembrane receptor activity;GO:0022891//substrate-specific transmembrane transporter activity;GO:0022857//transmembrane transporter activity;GO:0015276//ligand-gated ion channel activity;GO:0022892//substrate-specific transporter activity;GO:0022836//gated channel activity;GO:0005216//ion channel acti…	GO:0051234//establishment of localization;GO:0006811//ion transport;GO:0023052//signaling;GO:0006810//transport;GO:0009987//cellular process;GO:0007186//G-protein coupled receptor signaling pathway;GO:1902578//single-organism localization;GO:0051716//cellular response to stimulus;GO:0051179//localization;GO:0050794//regulation of cellular process;GO:0044763//single-organism cellular process;GO:00…
Unigene0000115	8.33333333333333	5.33333333333333	0.8798	0.0909	1.0678	0.4264	0.2208	0.3656	0.6795	0.3376	-1.00915864694757	0.272339526255127	0.983765159013896	no	-	--	-	-	-	-
Unigene0000116	19.3333333333333	21	1.4710	1.7694	1.1971	1.4017	1.8889	0.4315	1.47916666666667	1.2407	-0.253630303342962	0.71118538156966	1	no	ywhag1	PREDICTED: 14-3-3 protein gamma-like, partial [Anolis carolinensis]	ko04110//Cell cycle//Cell growth and death//Cellular Processes;ko04114//Oocyte meiosis//Cell growth and death//Cellular Processes	-	-	-
Unigene0000117	23.3333333333333	28.6666666666667	1.1150	1.2667	1.3532	1.6596	1.1191	0.7337	1.24496666666667	1.1708	-0.0886124645437131	0.891742896942739	1	no	-	--	-	-	-	-
Unigene0000118	384.666666666667	347.666666666667	2.5923	3.8242	3.3677	2.0740	2.3653	2.3505	3.2614	2.26326666666667	-0.527084815323371	0.168320629862948	0.904555363589127	no	Prickle1	PREDICTED: prickle-like protein 1 [Sinocyclocheilus anshuiensis]	ko04310//Wnt signaling pathway//Signal transduction//Environmental Information Processing	-	GO:0043169//cation binding;GO:0043167//ion binding;GO:0046872//metal ion binding;GO:0005488//binding;GO:0046914//transition metal ion binding	GO:0007420//brain development;GO:0044699//single-organism process;GO:0032501//multicellular organismal process;GO:0007417//central nervous system development;GO:0060322//head development;GO:0051179//localization;GO:0048870//cell motility;GO:0048856//anatomical structure development;GO:0044763//single-organism cellular process;GO:0007399//nervous system development;GO:0051674//localization of cell…
Unigene0000119	20	23.6666666666667	1.2746	0.5077	1.3259	0.7185	0.8681	1.2486	1.03606666666667	0.945066666666667	-0.132628829271855	0.850579749602573	1	no	-	--	-	-	-	-
Unigene0000120	65	94.6666666666667	1.1544	1.0534	1.3143	1.4515	1.2955	1.1906	1.17403333333333	1.31253333333333	0.160880691940609	0.731372160935594	1	no	Kazn	PREDICTED: kazrin-like [Sinocyclocheilus grahami]	-	-	-	-
Unigene0000121	13.6666666666667	12.3333333333333	0.4195	1.3647	0.7127	0.9584	0.3158	0.3923	0.8323	0.5555	-0.583316725526806	0.433089361864199	1	no	-	--	-	-	-	-
Unigene0000122	311.333333333333	447.666666666667	2.0506	1.6385	2.1166	1.6901	1.9769	2.6956	1.93523333333333	2.12086666666667	0.132146400984436	0.737378063925826	1	no	ARHGEF10L	PREDICTED: rho guanine nucleotide exchange factor 10-like protein [Cyprinus carpio]	-	-	-	-
Unigene0000123	3	7	0.0992	0.4611	0.2167	0.7419	0.0000	0.5567	0.259	0.432866666666667	0.740970610732106	0.545549662953249	1	no	-	--	-	-	-	-
Unigene0000124	15.6666666666667	18	1.8360	1.1093	0.9358	1.5444	1.2439	0.5150	1.2937	1.1011	-0.232557607280594	0.755460104169596	1	no	-	PREDICTED: transcription elongation factor A protein 3-like isoform X5 [Sinocyclocheilus rhinocerous]	-	GO:0005623//cell;GO:0043227//membrane-bounded organelle;GO:0044464//cell part;GO:0043231//intracellular membrane-bounded organelle;GO:0044424//intracellular part;GO:0043229//intracellular organelle;GO:0005622//intracellular;GO:0043226//organelle	GO:0043167//ion binding;GO:0003676//nucleic acid binding;GO:0043169//cation binding;GO:0003723//RNA binding;GO:0005488//binding;GO:0008135//translation factor activity, RNA binding;GO:0097159//organic cyclic compound binding;GO:1901363//heterocyclic compound binding;GO:0046872//metal ion binding;GO:0046914//transition metal ion binding	GO:0044238//primary metabolic process;GO:0044237//cellular metabolic process;GO:0090304//nucleic acid metabolic process;GO:0006412//translation;GO:0009987//cellular process;GO:0006725//cellular aromatic compound metabolic process;GO:0006366//transcription from RNA polymerase II promoter;GO:0008152//metabolic process;GO:0044267//cellular protein metabolic process;GO:0044260//cellular macromolecule…
Unigene0000125	2500.33333333333	4040	45.7803	46.2047	62.9785	53.1633	81.0499	62.9895	51.6545	65.7342333333333	0.347750860424844	0.295639573382789	0.992949978648283	no	TSNAX	translin-associated protein X [Danio rerio]	-	-	GO:0003676//nucleic acid binding;GO:0003677//DNA binding;GO:0097159//organic cyclic compound binding;GO:1901363//heterocyclic compound binding;GO:0005488//binding	-
Unigene0000126	2.33333333333333	2	0.0000	0.1521	0.2979	0.1020	0.1232	0.1020	0.15	0.109066666666667	-0.459752253162646	0.835938511991146	1	no	-	--	-	-	-	-
Unigene0000127	20	2	3.8619	0.3339	0.8502	0.0560	0.1352	0.1680	1.682	0.119733333333333	-3.81228095112252	0.000312010523587424	0.0712086384363266	no	-	--	-	-	-	-
Unigene0000128	1126.33333333333	1826.66666666667	13.2993	14.8136	16.6718	15.5633	22.7054	18.3313	14.9282333333333	18.8666666666667	0.337796111046288	0.325651048166433	0.999845213278851	no	Pdhx	PREDICTED: pyruvate dehydrogenase protein X component, mitochondrial isoform X1 [Sinocyclocheilus grahami]	ko01100//Metabolic pathways//Global and Overview//Metabolism;ko00010//Glycolysis / Gluconeogenesis//Carbohydrate metabolism//Metabolism;ko00620//Pyruvate metabolism//Carbohydrate metabolism//Metabolism;ko00020//Citrate cycle (TCA cycle)//Carbohydrate metabolism//Metabolism	-	GO:0016740//transferase activity;GO:0003824//catalytic activity	-
Unigene0000129	290.666666666667	279.666666666667	1.3389	1.7206	3.3829	1.3773	2.4825	1.2660	2.14746666666667	1.7086	-0.329821050286935	0.485129245821056	1	no	EML1	PREDICTED: echinoderm microtubule-associated protein-like 1 isoform X5 [Sinocyclocheilus rhinocerous]	-	-	-	-
Unigene0000130	15	34.3333333333333	0.8194	0.3808	0.5967	1.4182	0.8567	0.7946	0.598966666666667	1.02316666666667	0.772493546756681	0.193180455931476	0.92875366648064	no	-	--	-	-	-	-
Unigene0000131	6.66666666666667	8.33333333333333	0.8721	0.6305	0.2822	1.0868	0.2188	0.2416	0.594933333333333	0.515733333333333	-0.206102718767299	0.881210138428051	1	no	-	--	-	-	-	-
Unigene0000132	29.3333333333333	19	0.4029	2.2470	1.1736	0.7531	0.6066	0.5337	1.2745	0.631133333333333	-1.01391464684564	0.130440855161546	0.859209141209944	no	-	--	-	-	-	-
Unigene0000133	287.333333333333	352	4.5641	4.3785	4.7515	3.6318	4.0152	5.1076	4.5647	4.25153333333333	-0.102536797786407	0.792942022532354	1	no	sdhdb	PREDICTED: succinate dehydrogenase [ubiquinone] cytochrome b small subunit B, mitochondrial-like [Sinocyclocheilus anshuiensis]	ko01100//Metabolic pathways//Global and Overview//Metabolism;ko01110//Biosynthesis of secondary metabolites//Global and Overview//Metabolism;ko01130//Biosynthesis of antibiotics//Global and Overview//Metabolism;ko01120//Microbial metabolism in diverse environments//Global and Overview//Metabolism;ko00190//Oxidative phosphorylation//Energy metabolism//Metabolism;ko01200//Carbon metabolism//Global …	GO:0005622//intracellular;GO:0044429//mitochondrial part;GO:0044455//mitochondrial membrane part;GO:0031975//envelope;GO:0044424//intracellular part;GO:0031966//mitochondrial membrane;GO:0031090//organelle membrane;GO:0043229//intracellular organelle;GO:0044446//intracellular organelle part;GO:0016020//membrane;GO:0005746//mitochondrial respiratory chain;GO:0044422//organelle part;GO:0043226//org…	GO:0048038//quinone binding;GO:0046906//tetrapyrrole binding;GO:0048037//cofactor binding;GO:1901363//heterocyclic compound binding;GO:0005488//binding;GO:0097159//organic cyclic compound binding	GO:0044710//single-organism metabolic process;GO:0044699//single-organism process;GO:0008152//metabolic process;GO:0055114//oxidation-reduction process
Unigene0000134	57.3333333333333	47.6666666666667	4.5028	3.7667	5.0492	2.4689	1.6948	4.1542	4.43956666666667	2.77263333333333	-0.679162026228898	0.194749356660743	0.929947368447933	no	-	--	-	-	-	-
Unigene0000135	229.333333333333	479.666666666667	3.3161	5.5952	3.7835	12.8971	3.9114	2.8045	4.2316	6.53766666666667	0.627572560461655	0.248714961615197	0.964856222241273	no	Chi3l1	PREDICTED: acidic mammalian chitinase isoform X1 [Sinocyclocheilus rhinocerous]	-	-	-	-
Unigene0000136	15.6666666666667	11.3333333333333	2.7373	0.5452	0.9254	0.9746	0.8095	0.4266	1.40263333333333	0.7369	-0.928597160152317	0.216525670852658	0.944180278768194	no	-	--	-	-	-	-
Unigene0000137	25	40.6666666666667	1.7924	0.4813	0.4931	1.1416	0.8695	1.1670	0.922266666666667	1.05936666666667	0.199946158757	0.755696399553507	1	no	-	--	-	-	-	-
Unigene0000138	24	17.3333333333333	1.6570	2.6273	1.8453	1.7005	1.1006	0.5468	2.0432	1.11596666666667	-0.872536494879447	0.166827652138487	0.902982841981655	no	-	--	-	-	-	-
Unigene0000139	0.333333333333333	3	0.0000	0.0636	0.0000	0.0853	0.1031	0.2134	0.0212	0.133933333333333	2.65937889344893	0.100838196782678	0.802136809585816	no	-	--	-	-	-	-
Unigene0000140	436.333333333333	564.666666666667	8.4874	5.7671	9.0814	5.9476	7.3419	9.8831	7.77863333333333	7.7242	-0.0101311832608835	0.981013693876641	1	no	b9d2	PREDICTED: B9 domain-containing protein 2-like [Sinocyclocheilus grahami]	-	GO:0044430//cytoskeletal part;GO:0043232//intracellular non-membrane-bounded organelle;GO:0044463//cell projection part;GO:0044446//intracellular organelle part;GO:0035869//ciliary transition zone;GO:0043228//non-membrane-bounded organelle;GO:0015630//microtubule cytoskeleton;GO:0005856//cytoskeleton;GO:0044464//cell part;GO:0044424//intracellular part;GO:0043229//intracellular organelle;GO:00315…	GO:0008092//cytoskeletal protein binding;GO:0015631//tubulin binding;GO:0005488//binding;GO:0005515//protein binding	GO:0044763//single-organism cellular process;GO:0044767//single-organism developmental process;GO:0071702//organic substance transport;GO:0071840//cellular component organization or biogenesis;GO:0015031//protein transport;GO:0006810//transport;GO:0016043//cellular component organization;GO:0010927//cellular component assembly involved in morphogenesis;GO:0009987//cellular process;GO:0008104//pro…
Unigene0000141	713	433	11.6966	8.1826	4.4122	3.5278	2.5984	4.3732	8.09713333333333	3.4998	-1.2101387542102	0.0052468362766508	0.307276041026935	no	Sertad4	PREDICTED: SERTA domain-containing protein 4-like [Mesocricetus auratus]	-	-	-	-
Unigene0000142	5.33333333333333	6.66666666666667	0.2515	0.2338	0.3663	0.1959	0.5207	0.1568	0.283866666666667	0.291133333333333	0.036466581327958	1	1	no	-	PREDICTED: cysteine-rich motor neuron 1 protein-like [Cyprinus carpio]	-	-	GO:0030234//enzyme regulator activity;GO:0004857//enzyme inhibitor activity;GO:0098772//molecular function regulator	GO:0043086//negative regulation of catalytic activity;GO:0048519//negative regulation of biological process;GO:0044092//negative regulation of molecular function;GO:0065009//regulation of molecular function;GO:0065007//biological regulation;GO:0050789//regulation of biological process;GO:0009892//negative regulation of metabolic process;GO:0019222//regulation of metabolic process;GO:0050790//regu…
Unigene0000143	439.333333333333	680.333333333333	3.9247	4.2823	5.4848	5.2172	6.0188	5.3033	4.56393333333333	5.5131	0.272586052231209	0.457141474081391	1	no	Pomt1	PREDICTED: protein O-mannosyl-transferase 1-like [Cyprinus carpio]	ko01100//Metabolic pathways//Global and Overview//Metabolism;ko00514//Other types of O-glycan biosynthesis//Glycan biosynthesis and metabolism//Metabolism	-	GO:0000030//mannosyltransferase activity;GO:0016757//transferase activity, transferring glycosyl groups;GO:0016740//transferase activity;GO:0016758//transferase activity, transferring hexosyl groups;GO:0003824//catalytic activity	GO:0043170//macromolecule metabolic process;GO:0044763//single-organism cellular process;GO:0043413//macromolecule glycosylation;GO:0044699//single-organism process;GO:0044723//single-organism carbohydrate metabolic process;GO:0044267//cellular protein metabolic process;GO:0008152//metabolic process;GO:0005975//carbohydrate metabolic process;GO:0034645//cellular macromolecule biosynthetic process…
Unigene0000144	36	70.3333333333333	0.6249	0.6223	0.8125	1.2792	0.8568	0.9460	0.686566666666667	1.02733333333333	0.581432640963864	0.241118078296371	0.959969853924484	no	Nrcam	PREDICTED: neuronal cell adhesion molecule-like isoform X2 [Sinocyclocheilus anshuiensis]	ko04514//Cell adhesion molecules (CAMs)//Signaling molecules and interaction//Environmental Information Processing	-	-	-
Unigene0000145	61	59	3.0410	2.0189	4.4738	2.4747	2.5694	2.2438	3.1779	2.4293	-0.387533064855757	0.449823114101931	1	no	-	--	-	-	-	-
Unigene0000146	2548	3565	10.1142	8.6683	10.2150	8.9071	11.3347	10.8930	9.66583333333333	10.3782666666667	0.102599487216339	0.746138040800658	1	no	KDM6B	PREDICTED: LOW QUALITY PROTEIN: lysine-specific demethylase 6B-like [Cyprinus carpio]	-	-	-	-
Unigene0000147	13	16	0.8522	0.9681	1.3100	0.4130	1.2117	1.4166	1.04343333333333	1.01376666666667	-0.0416127942587507	0.999999999999992	1	no	-	--	-	-	-	-
Unigene0000148	113.333333333333	127.333333333333	4.5903	4.4605	1.7725	3.1200	4.1884	1.6909	3.60776666666667	2.99976666666667	-0.266255748156232	0.617496527539168	1	no	-	--	-	-	-	-
Unigene0000149	912.333333333333	912	12.1532	8.6856	9.7883	5.6871	6.6211	10.5999	10.2090333333333	7.63603333333333	-0.418950962043354	0.269891836769547	0.98281593110894	no	KLF9	PREDICTED: Krueppel-like factor 9 [Sinocyclocheilus rhinocerous]	-	-	GO:0005488//binding;GO:0043167//ion binding;GO:0043169//cation binding	-
Unigene0000150	2671.66666666667	3276.66666666667	23.6090	20.6019	23.6058	20.2839	19.6520	23.2129	22.6055666666667	21.0496	-0.102885264573192	0.743216231373467	1	no	RPS6KB1	PREDICTED: ribosomal protein S6 kinase beta-1-like [Sinocyclocheilus anshuiensis]	ko04910//Insulin signaling pathway//Endocrine system//Organismal Systems;ko04012//ErbB signaling pathway//Signal transduction//Environmental Information Processing;ko04350//TGF-beta signaling pathway//Signal transduction//Environmental Information Processing;ko04150//mTOR signaling pathway//Signal transduction//Environmental Information Processing	-	GO:0001883//purine nucleoside binding;GO:0016772//transferase activity, transferring phosphorus-containing groups;GO:0097159//organic cyclic compound binding;GO:0036094//small molecule binding;GO:0032549//ribonucleoside binding;GO:0016773//phosphotransferase activity, alcohol group as acceptor;GO:0016740//transferase activity;GO:0003824//catalytic activity;GO:0016301//kinase activity;GO:0032550//…	GO:0006793//phosphorus metabolic process;GO:0044267//cellular protein metabolic process;GO:0008152//metabolic process;GO:0007154//cell communication;GO:0044763//single-organism cellular process;GO:0044238//primary metabolic process;GO:0044260//cellular macromolecule metabolic process;GO:0071704//organic substance metabolic process;GO:0019538//protein metabolic process;GO:0043170//macromolecule me…
Unigene0000151	7413.33333333333	8916	233.7311	307.9180	247.0884	309.3489	256.9987	155.6882	262.9125	240.6786	-0.127474865650951	0.709539745440441	1	no	CNFN	plac8 onzin related protein 1 [Danio rerio]	-	-	-	GO:0032502//developmental process;GO:0007275//multicellular organism development;GO:0044767//single-organism developmental process;GO:0048856//anatomical structure development;GO:0048731//system development;GO:0044707//single-multicellular organism process;GO:0044699//single-organism process;GO:0032501//multicellular organismal process;GO:0009653//anatomical structure morphogenesis
Unigene0000152	559	322	25.9907	19.8946	20.3988	9.2176	7.0745	11.9972	22.0947	9.42976666666667	-1.22840636451356	0.0016835928835655	0.177268189344201	no	-	--	-	-	-	-
Unigene0000153	63.6666666666667	70.6666666666667	5.7555	6.2124	3.8529	3.8174	5.8699	3.5878	5.2736	4.42503333333333	-0.253099824719815	0.610557322537374	1	no	-	--	-	-	-	-
Unigene0000154	9586	13620	62.7509	71.8897	75.2483	61.3023	92.7144	77.5006	69.9629666666667	77.1724333333333	0.141494130544045	0.652293902355512	1	no	Kpnb1	PREDICTED: importin subunit beta-1 isoform X1 [Sinocyclocheilus rhinocerous]	ko03013//RNA transport//Translation//Genetic Information Processing	-	-	-
Unigene0000155	69	181.666666666667	1.0498	0.1976	1.0837	1.7552	1.9905	1.1100	0.777033333333333	1.61856666666667	1.05866839541564	0.0718446420795098	0.732202038775979	no	slc17a8	PREDICTED: vesicular glutamate transporter 3 [Cyprinus carpio]	-	GO:0044456//synapse part;GO:0042995//cell projection;GO:0005623//cell;GO:0005622//intracellular;GO:0031410//cytoplasmic vesicle;GO:0005737//cytoplasm;GO:0043226//organelle;GO:0045202//synapse;GO:0031982//vesicle;GO:0016023//cytoplasmic, membrane-bounded vesicle;GO:0043229//intracellular organelle;GO:0099503//secretory vesicle;GO:0044444//cytoplasmic part;GO:0043231//intracellular membrane-bounded…	GO:0022804//active transmembrane transporter activity;GO:0015291//secondary active transmembrane transporter activity;GO:0005215//transporter activity;GO:0022857//transmembrane transporter activity	GO:0044765//single-organism transport;GO:0023052//signaling;GO:0044699//single-organism process;GO:0044763//single-organism cellular process;GO:0050877//neurological system process;GO:0006810//transport;GO:0003008//system process;GO:0007154//cell communication;GO:0007600//sensory perception;GO:0032501//multicellular organismal process;GO:0009987//cellular process;GO:0050896//response to stimulus;…
Unigene0000156	11	20.6666666666667	1.2721	0.1867	0.5363	1.0429	0.5544	1.0851	0.665033333333333	0.894133333333333	0.427063328068176	0.564875505400108	1	no	MAP1B	PREDICTED: electromotor neuron-associated protein 1-like, partial [Sinocyclocheilus grahami]	-	-	-	-
Unigene0000157	1320.33333333333	1845	18.6034	24.1386	24.2030	26.4503	29.4275	16.9482	22.315	24.2753333333333	0.121477299355223	0.733997644362862	1	no	Prss16	Zgc:158605 [Danio rerio]	-	-	GO:0003824//catalytic activity;GO:0016787//hydrolase activity;GO:0008233//peptidase activity;GO:0070011//peptidase activity, acting on L-amino acid peptides	GO:0071704//organic substance metabolic process;GO:0008152//metabolic process;GO:0051604//protein maturation;GO:0044238//primary metabolic process;GO:0019538//protein metabolic process;GO:0016485//protein processing;GO:0006508//proteolysis;GO:0043170//macromolecule metabolic process;GO:0010467//gene expression
Unigene0000158	729.666666666667	1356.66666666667	4.6436	5.0643	6.1578	5.9396	10.3143	7.0148	5.28856666666667	7.75623333333333	0.552479436155165	0.133853087928278	0.864726642173456	no	TECPR1	PREDICTED: tectonin beta-propeller repeat-containing protein 1-like isoform X3 [Sinocyclocheilus anshuiensis]	-	-	-	-
Unigene0000159	33.3333333333333	26.3333333333333	1.4739	0.4982	1.7887	0.3896	1.0086	0.9745	1.2536	0.7909	-0.664509885395985	0.297163002188324	0.994286818400849	no	-	--	-	-	-	-
Unigene0000160	48.6666666666667	78.3333333333333	0.5071	0.5473	0.9410	0.9784	0.7881	0.7648	0.665133333333333	0.843766666666667	0.343200520666621	0.494499526909408	1	no	HS3ST5	PREDICTED: heparan sulfate glucosamine 3-O-sulfotransferase 5 [Cyprinus carpio]	ko00534//Glycosaminoglycan biosynthesis - heparan sulfate / heparin//Glycan biosynthesis and metabolism//Metabolism	-	-	-
Unigene0000161	2110	1961.66666666667	15.3714	12.5240	13.4227	8.4651	8.6136	11.7983	13.7727	9.62566666666667	-0.516853043847334	0.121143308316756	0.842724249286971	no	Rps6kb1	PREDICTED: ribosomal protein S6 kinase beta-1-like [Danio rerio]	ko04910//Insulin signaling pathway//Endocrine system//Organismal Systems;ko04012//ErbB signaling pathway//Signal transduction//Environmental Information Processing;ko04350//TGF-beta signaling pathway//Signal transduction//Environmental Information Processing;ko04150//mTOR signaling pathway//Signal transduction//Environmental Information Processing	-	GO:0032549//ribonucleoside binding;GO:0003824//catalytic activity;GO:0097159//organic cyclic compound binding;GO:1901363//heterocyclic compound binding;GO:0097367//carbohydrate derivative binding;GO:0001882//nucleoside binding;GO:0004672//protein kinase activity;GO:0036094//small molecule binding;GO:0032550//purine ribonucleoside binding;GO:0005488//binding;GO:0016773//phosphotransferase activity…	GO:0044260//cellular macromolecule metabolic process;GO:0043170//macromolecule metabolic process;GO:0036211//protein modification process;GO:0044237//cellular metabolic process;GO:0044763//single-organism cellular process;GO:0044699//single-organism process;GO:0019538//protein metabolic process;GO:0043412//macromolecule modification;GO:0006464//cellular protein modification process;GO:0044238//pr…
Unigene0000162	27.6666666666667	43	0.9292	0.9459	1.2565	1.8471	1.3323	0.6068	1.04386666666667	1.26206666666667	0.273850672506102	0.65225187538973	1	no	-	--	-	-	-	-
Unigene0000163	16.3333333333333	88.6666666666667	0.0917	1.1082	0.1558	4.4002	0.5984	0.1715	0.4519	1.72336666666667	1.93115422255415	0.0632519737358978	0.705931656507614	no	-	apolipoprotein M [Hemibarbus mylodon]	-	-	-	-
Unigene0000164	20	38	0.8498	0.7067	0.7816	1.4769	0.7407	1.0873	0.779366666666667	1.10163333333333	0.499269984255562	0.381737337901133	1	no	-	--	-	-	-	-
Unigene0000165	3.66666666666667	2.33333333333333	0.4748	0.1765	0.2766	0.1775	0.2144	0.0592	0.3093	0.150366666666667	-1.04052204809106	0.326160069499473	0.999845213278851	no	-	--	-	-	-	-
Unigene0000166	35.3333333333333	63.6666666666667	1.5741	0.6009	0.5526	0.8407	1.4388	1.3142	0.9092	1.1979	0.397837888536356	0.492564486374365	1	no	-	gag-like protein [Danio rerio]	-	-	-	-
Unigene0000167	13.6666666666667	51.6666666666667	0.0000	1.8878	0.0000	3.9507	0.5593	0.3706	0.629266666666667	1.62686666666667	1.37035258868235	0.302739716778852	0.995794726109231	no	Gpr87	PREDICTED: G-protein coupled receptor 87-like [Sinocyclocheilus rhinocerous]	ko04080//Neuroactive ligand-receptor interaction//Signaling molecules and interaction//Environmental Information Processing	-	-	-
Unigene0000168	10.6666666666667	13	1.2711	0.6751	0.6611	0.5657	0.6835	1.0754	0.8691	0.774866666666667	-0.165574101894498	0.900966209538808	1	no	-	PREDICTED: metalloreductase STEAP2-like [Sinocyclocheilus rhinocerous]	-	-	-	-
Unigene0000169	9.66666666666667	15.6666666666667	0.5764	0.8928	0.9093	0.5387	0.9400	1.4970	0.792833333333333	0.9919	0.323177060846963	0.678336075780144	1	no	-	--	-	-	-	-
Unigene0000170	1507	1082.66666666667	26.0013	17.8672	16.5473	7.4635	8.4853	15.9367	20.1386	10.6285	-0.92202538950063	0.0207629665841317	0.500335174204749	no	BBS10	PREDICTED: Bardet-Biedl syndrome 10 protein-like isoform X1 [Sinocyclocheilus rhinocerous]	-	-	GO:0032549//ribonucleoside binding;GO:0001883//purine nucleoside binding;GO:0001882//nucleoside binding;GO:0032550//purine ribonucleoside binding;GO:1901363//heterocyclic compound binding;GO:0097159//organic cyclic compound binding;GO:0097367//carbohydrate derivative binding;GO:0005488//binding;GO:0036094//small molecule binding	GO:0071704//organic substance metabolic process;GO:0044238//primary metabolic process;GO:0019538//protein metabolic process;GO:0008152//metabolic process;GO:0043170//macromolecule metabolic process
Unigene0000171	34.6666666666667	49.6666666666667	1.4459	1.9353	1.8109	1.5495	3.1347	1.2258	1.7307	1.97	0.186839960448891	0.750241027275604	1	no	-	--	-	-	-	-
Unigene0000172	6	5.66666666666667	0.7468	0.1735	0.5438	0.4653	0.1405	0.4074	0.488033333333333	0.337733333333333	-0.531095112836688	0.615130806795241	1	no	-	--	-	-	-	-
Unigene0000173	181.333333333333	211	3.3335	6.4808	3.4994	5.8155	3.6594	2.1126	4.4379	3.8625	-0.20034222637697	0.683688217165016	1	no	-	PREDICTED: E3 ubiquitin-protein ligase DTX3L-like [Sinocyclocheilus rhinocerous]	ko04330//Notch signaling pathway//Signal transduction//Environmental Information Processing	-	-	-
Unigene0000174	1556.33333333333	1547.33333333333	20.3930	18.7446	18.5128	10.6985	13.9894	18.6061	19.2168	14.4313333333333	-0.413163518321601	0.237609701987052	0.958732554827833	no	DNAJB1	PREDICTED: dnaJ homolog subfamily B member 1-like [Sinocyclocheilus grahami]	ko04141//Protein processing in endoplasmic reticulum//Folding, sorting and degradation//Genetic Information Processing	-	GO:0005488//binding;GO:0005515//protein binding	GO:0043170//macromolecule metabolic process;GO:0008152//metabolic process;GO:0044260//cellular macromolecule metabolic process;GO:0009987//cellular process;GO:0044238//primary metabolic process;GO:0019538//protein metabolic process;GO:0044237//cellular metabolic process;GO:0071704//organic substance metabolic process;GO:0044267//cellular protein metabolic process
Unigene0000175	2.66666666666667	3.66666666666667	0.1883	0.0000	0.4113	0.4693	0.1417	0.0587	0.199866666666667	0.223233333333333	0.159514584764291	1	1	no	-	--	-	-	-	-
Unigene0000176	160.333333333333	213.666666666667	1.5691	1.7407	1.9257	2.0814	1.9051	1.3962	1.74516666666667	1.79423333333333	0.040002696473484	0.929351729269269	1	no	GLB1L2	PREDICTED: beta-galactosidase-1-like protein 2 [Sinocyclocheilus rhinocerous]	-	-	GO:0003824//catalytic activity;GO:0004553//hydrolase activity, hydrolyzing O-glycosyl compounds;GO:0016798//hydrolase activity, acting on glycosyl bonds;GO:0016787//hydrolase activity;GO:0015925//galactosidase activity	GO:0044238//primary metabolic process;GO:0008152//metabolic process
Unigene0000177	2311	3981.33333333333	15.1059	20.3203	18.0192	26.2059	23.2516	20.8030	17.8151333333333	23.4201666666667	0.39464806159711	0.217807499227812	0.945538503770905	no	snd1	staphylococcal nuclease domain-containing protein 1 isoform p100L [Danio rerio]	-	GO:1990904//ribonucleoprotein complex;GO:0030529//intracellular ribonucleoprotein complex;GO:0005622//intracellular;GO:0044464//cell part;GO:0032991//macromolecular complex;GO:0044424//intracellular part;GO:0005623//cell;GO:0031332//RNAi effector complex	GO:0016787//hydrolase activity;GO:0003824//catalytic activity;GO:0097159//organic cyclic compound binding;GO:0016788//hydrolase activity, acting on ester bonds;GO:0005488//binding	GO:0050789//regulation of biological process;GO:0044699//single-organism process;GO:0010468//regulation of gene expression;GO:0060255//regulation of macromolecule metabolic process;GO:0009987//cellular process;GO:0065007//biological regulation;GO:0019222//regulation of metabolic process;GO:0048519//negative regulation of biological process;GO:0009892//negative regulation of metabolic process;GO:0…
Unigene0000178	14	16	0.6217	0.7556	0.4179	0.4171	0.3240	0.7453	0.5984	0.495466666666667	-0.272322174226139	0.720168460314961	1	no	-	--	-	-	-	-
Unigene0000179	227	231.666666666667	2.2755	1.4733	2.0110	1.8116	1.2517	1.3639	1.91993333333333	1.47573333333333	-0.379624168159574	0.359126097471537	1	no	Parp12	PREDICTED: poly [ADP-ribose] polymerase 12-like [Sinocyclocheilus grahami]	-	-	GO:0005488//binding;GO:0043169//cation binding;GO:0043167//ion binding	-
Unigene0000180	13.3333333333333	8.66666666666667	1.2221	0.5345	0.7852	0.4479	0.0541	0.6722	0.847266666666667	0.3914	-1.11417235542098	0.167240905783655	0.903496212781128	no	-	--	-	-	-	-
Unigene0000181	2738	2346.66666666667	25.3749	24.0507	19.1855	8.4525	18.1555	17.9674	22.8703666666667	14.8584666666667	-0.622194252489508	0.0940689659764804	0.787461910762341	no	QflA-14927	PREDICTED: coiled-coil domain-containing protein 191-like [Sinocyclocheilus rhinocerous]	-	-	-	-
Unigene0000182	44	39.6666666666667	2.1437	2.1541	2.3203	1.8410	1.1776	1.4808	2.20603333333333	1.4998	-0.55668446176974	0.27926339389244	0.984298542294754	no	rpl24	PREDICTED: 60S ribosomal protein L24-like, partial [Panthera pardus]	ko03010//Ribosome//Translation//Genetic Information Processing	-	-	-
Unigene0000183	106	148	1.7198	1.0369	1.5230	1.5349	1.5628	1.4584	1.42656666666667	1.5187	0.0902897429266564	0.845201666294631	1	no	FSBP	PREDICTED: fibrinogen silencer-binding protein-like [Sinocyclocheilus rhinocerous]	ko03440//Homologous recombination//Replication and repair//Genetic Information Processing	-	-	-
Unigene0000184	257.333333333333	425.666666666667	4.1376	23.0376	1.3036	27.3166	1.2279	3.3233	9.49293333333333	10.6226	0.162211068499105	0.86801391307271	1	no	-	PREDICTED: uncharacterized protein LOC109112478 [Cyprinus carpio]	-	-	-	-
Unigene0000185	26.6666666666667	51	0.5498	0.6530	0.8674	1.0848	1.3566	0.7045	0.690066666666667	1.04863333333333	0.603702660133319	0.264292496900825	0.978510539244042	no	KCNN3	PREDICTED: small conductance calcium-activated potassium channel protein 3 isoform X1 [Danio rerio]	-	-	-	-
Unigene0000186	3749	7890.66666666667	62.7556	79.7796	59.6496	185.9523	79.2838	50.7333	67.3949333333333	105.323133333333	0.64411030631267	0.134479738366232	0.865471174469412	no	anxa2-a	PREDICTED: annexin A2-like [Sinocyclocheilus grahami]	-	-	GO:0043168//anion binding;GO:0098772//molecular function regulator;GO:0008289//lipid binding;GO:0043167//ion binding;GO:0030234//enzyme regulator activity;GO:0004857//enzyme inhibitor activity;GO:0005543//phospholipid binding;GO:0055102//lipase inhibitor activity;GO:0005515//protein binding;GO:0005488//binding	-
Unigene0000187	10.6666666666667	14.3333333333333	1.1016	0.5120	0.9358	0.4576	1.1057	1.0873	0.8498	0.883533333333333	0.0561612211511988	0.953183956631538	1	no	-	--	-	-	-	-
Unigene0000188	14.3333333333333	34.3333333333333	0.4790	0.5262	0.6025	0.6241	0.8195	1.4931	0.5359	0.9789	0.869197672101727	0.15087843599269	0.886297288548633	no	-	PREDICTED: sorbin and SH3 domain-containing protein 2-like [Sinocyclocheilus rhinocerous]	-	-	-	-
Unigene0000189	3.33333333333333	6.33333333333333	0.0000	0.3336	0.1742	0.3354	0.0901	0.2983	0.169266666666667	0.241266666666667	0.511330712725032	0.667543769085754	1	no	-	--	-	-	-	-
Unigene0000190	843.666666666667	1087.33333333333	16.0511	13.9155	15.6794	12.6531	15.3808	16.8273	15.2153333333333	14.9537333333333	-0.0250202292460356	0.943333194687708	1	no	rbm18	PREDICTED: probable RNA-binding protein 18 [Sinocyclocheilus rhinocerous]	-	-	GO:0005488//binding;GO:1901363//heterocyclic compound binding;GO:0003676//nucleic acid binding;GO:0036094//small molecule binding;GO:0097159//organic cyclic compound binding	-
Unigene0000191	13.3333333333333	12	0.6977	1.1349	1.1431	0.5977	0.9847	0.5437	0.9919	0.7087	-0.485019631276799	0.473000312043218	1	no	-	--	-	-	-	-
Unigene0000192	11	18.6666666666667	0.3922	0.6379	1.5707	1.6494	1.4761	0.5501	0.866933333333333	1.2252	0.499024311629759	0.529837549573415	1	no	-	--	-	-	-	-
Unigene0000193	42	91.6666666666667	1.1182	0.3071	1.2769	2.1535	1.4157	1.0298	0.900733333333333	1.533	0.767185739808511	0.197586695830644	0.931276245292093	no	-	UDP glucuronosyltransferase 2 family polypeptide a1 isoform 3 [Danio rerio]	-	-	GO:0016757//transferase activity, transferring glycosyl groups;GO:0016740//transferase activity;GO:0003824//catalytic activity	-
Unigene0000194	412.666666666667	377.666666666667	5.1496	5.0084	4.2909	5.0857	2.5476	2.1759	4.8163	3.26973333333333	-0.558752278221615	0.18958607134121	0.925540320618713	no	-	--	-	-	-	-
Unigene0000195	9.33333333333333	13.3333333333333	0.5508	1.1093	0.6016	0.6292	1.3130	0.5723	0.7539	0.838166666666667	0.152863975643179	0.851188319607377	1	no	-	--	-	-	-	-
Unigene0000196	248.666666666667	362.666666666667	2.7765	2.6570	3.3264	3.0849	3.7683	3.0694	2.91996666666667	3.30753333333333	0.179803796173426	0.645406692033366	1	no	Shpk	PREDICTED: sedoheptulokinase [Sinocyclocheilus rhinocerous]	-	-	GO:0003824//catalytic activity;GO:0016740//transferase activity;GO:0016772//transferase activity, transferring phosphorus-containing groups	-
Unigene0000197	192.666666666667	439.333333333333	2.8659	4.7145	3.7928	9.9487	5.8044	3.9276	3.79106666666667	6.56023333333333	0.791143302490259	0.0808754851207612	0.755704359424876	no	DDO	PREDICTED: D-aspartate oxidase-like [Sinocyclocheilus rhinocerous]	ko04146//Peroxisome//Transport and catabolism//Cellular Processes;ko00250//Alanine, aspartate and glutamate metabolism//Amino acid metabolism//Metabolism	-	GO:0003824//catalytic activity;GO:0016638//oxidoreductase activity, acting on the CH-NH2 group of donors;GO:0016491//oxidoreductase activity;GO:0016641//oxidoreductase activity, acting on the CH-NH2 group of donors, oxygen as acceptor;GO:0003884//D-amino-acid oxidase activity	GO:0008152//metabolic process;GO:0044699//single-organism process;GO:0044710//single-organism metabolic process
Unigene0000198	411.666666666667	774.666666666667	2.3657	3.1571	2.1545	7.3082	1.6904	1.5187	2.5591	3.50576666666667	0.454093454256904	0.406557887556238	1	no	THRAP3	PREDICTED: thyroid hormone receptor-associated protein 3-like isoform X2 [Sinocyclocheilus anshuiensis]	-	-	-	-
Unigene0000199	44	67	0.6430	0.5122	0.8962	0.9958	0.8989	0.5611	0.6838	0.8186	0.25958424400969	0.630097483185046	1	no	XKR7	XK-related protein 7 [Danio rerio]	-	GO:0044425//membrane part;GO:0031224//intrinsic component of membrane;GO:0016020//membrane	-	-
Unigene0000200	57.3333333333333	73.3333333333333	1.1028	0.5560	1.1025	1.0249	1.1538	0.5826	0.920433333333333	0.920433333333333	0	1	1	no	LYPD6B	PREDICTED: ly6/PLAUR domain-containing protein 6B-like isoform X1 [Sinocyclocheilus anshuiensis]	-	-	-	-
Unigene0000201	5	9.66666666666667	0.0820	0.6100	0.3584	1.0733	0.3705	0.1023	0.350133333333333	0.515366666666667	0.557694812821262	0.610620650357726	1	no	Ttc22	PREDICTED: LOW QUALITY PROTEIN: tetratricopeptide repeat protein 22-like [Cyprinus carpio]	-	-	-	-
Unigene0000202	10.6666666666667	19.6666666666667	1.0154	1.1154	0.5377	1.1503	0.7644	1.6113	0.8895	1.17533333333333	0.402003463331862	0.565071076562564	1	no	-	--	-	-	-	-
Unigene0000203	13.6666666666667	13	0.9927	0.7097	1.0008	0.5709	0.8047	0.6188	0.901066666666667	0.6648	-0.438713467672302	0.509864205934745	1	no	-	--	-	-	-	-
Unigene0000204	13.3333333333333	18.6666666666667	0.3622	0.3928	1.1868	0.7522	1.3632	0.2258	0.647266666666667	0.7804	0.269853568948975	0.743562239317034	1	no	-	--	-	-	-	-
Unigene0000205	2.66666666666667	10.6666666666667	0.2779	0.1292	0.1012	0.6926	0.3138	0.4331	0.169433333333333	0.479833333333333	1.50181565300235	0.0996916608943086	0.798799981459671	no	-	PREDICTED: histone-lysine N-methyltransferase 2C-like isoform X19 [Salmo salar]	-	-	-	-
Unigene0000206	1195.33333333333	1541.66666666667	14.2193	15.2365	14.8016	21.6576	10.7679	10.3692	14.7524666666667	14.2649	-0.048486565204369	0.899974331424726	1	no	optn	PREDICTED: optineurin [Sinocyclocheilus rhinocerous]	-	GO:0005623//cell;GO:0044464//cell part;GO:0005622//intracellular;GO:0044424//intracellular part	-	-
Unigene0000207	25	61.3333333333333	0.3682	1.8254	1.6535	2.8296	1.5245	2.9458	1.28236666666667	2.4333	0.924105369943739	0.136975037799919	0.868376814133157	no	sand	PREDICTED: vacuolar fusion protein MON1 homolog B-like [Sinocyclocheilus anshuiensis]	-	-	-	-
Unigene0000208	6.66666666666667	11.6666666666667	0.4657	0.9378	0.0565	0.3869	0.2921	1.0644	0.486666666666667	0.581133333333333	0.255935245573361	0.813094043218553	1	no	PCLO	PREDICTED: protein piccolo isoform X3 [Danio rerio]	-	-	-	-
Unigene0000209	6.66666666666667	10	0.3289	0.3822	0.6587	0.6661	0.4333	0.5126	0.4566	0.537333333333333	0.234886478469471	0.796152119737068	1	no	-	--	-	-	-	-
Unigene0000210	1290.66666666667	2314.66666666667	29.3062	54.7550	19.5649	70.3719	35.9772	28.4590	34.5420333333333	44.9360333333333	0.379519767912844	0.400135022251701	1	no	IRF1	interferon regulatory factor 1 [Carassius auratus]	-	-	GO:0097159//organic cyclic compound binding;GO:1901363//heterocyclic compound binding;GO:0005488//binding;GO:0003676//nucleic acid binding	-
Unigene0000211	22.6666666666667	15.6666666666667	1.7493	1.5356	2.3353	1.0294	0.2195	1.6357	1.8734	0.961533333333333	-0.962250193032485	0.169936358312841	0.90654466765636	no	-	--	-	-	-	-
Unigene0000212	8.33333333333333	5.33333333333333	1.6330	0.3571	0.2798	0.4190	0.2169	0.3593	0.756633333333333	0.331733333333333	-1.18957035068749	0.202314550187413	0.934933066259038	no	-	--	-	-	-	-
Unigene0000213	9.66666666666667	11.6666666666667	0.8645	0.8036	0.7694	1.1372	0.5785	0.4790	0.8125	0.731566666666667	-0.151378471854167	0.890033331771838	1	no	-	--	-	-	-	-
Unigene0000214	4.33333333333333	8	0.5994	0.2388	0.1871	0.4802	0.3223	0.5338	0.341766666666667	0.445433333333333	0.382197829755231	0.690307033286972	1	no	-	--	-	-	-	-
Unigene0000215	3.66666666666667	15.3333333333333	0.2907	0.2702	0.3528	0.9660	1.8965	0.2416	0.304566666666667	1.0347	1.76438257497705	0.0557179964032849	0.675662601740176	no	-	PREDICTED: low-density lipoprotein receptor class A domain-containing protein 4-like [Sinocyclocheilus grahami]	-	-	-	-
Unigene0000216	46	51.6666666666667	0.5120	1.4013	1.3878	1.1521	0.6424	1.0640	1.10036666666667	0.952833333333333	-0.207688552414475	0.725351423888637	1	no	ERBB4	PREDICTED: receptor tyrosine-protein kinase erbB-4-like [Sinocyclocheilus grahami]	ko04020//Calcium signaling pathway//Signal transduction//Environmental Information Processing;ko04144//Endocytosis//Transport and catabolism//Cellular Processes;ko04012//ErbB signaling pathway//Signal transduction//Environmental Information Processing	-	GO:0016740//transferase activity;GO:0003824//catalytic activity;GO:0016772//transferase activity, transferring phosphorus-containing groups;GO:0004672//protein kinase activity;GO:0016773//phosphotransferase activity, alcohol group as acceptor;GO:1901363//heterocyclic compound binding;GO:0005488//binding;GO:0036094//small molecule binding;GO:0097159//organic cyclic compound binding;GO:0004713//pro…	GO:0006796//phosphate-containing compound metabolic process;GO:0006793//phosphorus metabolic process;GO:0044237//cellular metabolic process;GO:0008152//metabolic process;GO:0009987//cellular process
Unigene0000217	163	111	2.6365	1.5881	2.0807	0.9544	1.7740	0.6335	2.10176666666667	1.12063333333333	-0.907288202077691	0.0671015441089654	0.718445200758896	no	-	PREDICTED: nesprin-1-like [Sinocyclocheilus rhinocerous]	-	-	-	-
Unigene0000218	20.3333333333333	14	1.2709	0.7269	0.6763	0.3350	0.8095	0.2742	0.891366666666667	0.4729	-0.914483869487066	0.176070161008875	0.913670299133562	no	EPS15	PREDICTED: extracellular matrix-binding protein ebh-like, partial [Sinocyclocheilus anshuiensis]	-	-	-	-
Unigene0000219	277.666666666667	172.666666666667	9.9015	5.5161	7.4146	2.5300	6.6776	2.0250	7.61073333333333	3.7442	-1.02337797161425	0.0449667436272203	0.635568454558366	no	-	PREDICTED: extracellular matrix-binding protein ebh-like, partial [Sinocyclocheilus anshuiensis]	-	-	-	-
Unigene0000220	485.333333333333	746	2.8237	3.0278	2.8735	3.2440	5.1221	2.1208	2.90833333333333	3.49563333333333	0.265361233892925	0.512066058569113	1	no	SORCS3	PREDICTED: VPS10 domain-containing receptor SorCS3-like [Sinocyclocheilus grahami]	-	-	-	-
Unigene0000221	31	42	0.7674	0.6464	0.5588	0.5976	0.9387	0.5082	0.657533333333333	0.6815	0.0516496240464881	0.939543692586635	1	no	-	--	-	-	-	-
Unigene0000222	2583	3472	10.7888	10.3621	12.1966	11.6463	12.0976	10.7464	11.1158333333333	11.4967666666667	0.0486120682537117	0.876806440266277	1	no	CCNT2	PREDICTED: cyclin-T2-like isoform X1 [Sinocyclocheilus rhinocerous]	-	-	-	GO:0010467//gene expression;GO:0051726//regulation of cell cycle;GO:0009058//biosynthetic process;GO:0090304//nucleic acid metabolic process;GO:0034645//cellular macromolecule biosynthetic process;GO:0044271//cellular nitrogen compound biosynthetic process;GO:0050789//regulation of biological process;GO:0019438//aromatic compound biosynthetic process;GO:0044260//cellular macromolecule metabolic p…
Unigene0000223	49.3333333333333	76	0.8865	1.1197	0.9269	1.9544	0.4449	0.9068	0.9777	1.10203333333333	0.172704104027289	0.768047272433673	1	no	-	--	-	-	-	-
Unigene0000224	17.6666666666667	34.3333333333333	1.9437	2.8003	0.1415	4.9048	0.5853	0.8482	1.6285	2.11276666666667	0.375589725517845	0.692330998079713	1	no	-	--	-	-	-	-
Unigene0000225	8.33333333333333	7.33333333333333	0.9719	0.3613	0.7784	0.0606	0.2926	1.0299	0.703866666666667	0.461033333333333	-0.610431102059727	0.583106518101113	1	no	-	--	-	-	-	-
Unigene0000226	11.6666666666667	26	1.7195	0.2906	0.5122	0.7792	3.2360	0.3411	0.840766666666667	1.4521	0.788363431127472	0.369889287861761	1	no	BTBD11	PREDICTED: ankyrin repeat and BTB/POZ domain-containing protein 2-like [Sinocyclocheilus rhinocerous]	-	-	-	-
Unigene0000227	17.6666666666667	12.6666666666667	2.1256	0.5388	1.7589	0.9030	0.8000	0.7228	1.47443333333333	0.8086	-0.86666248353583	0.211273973439685	0.94051356554496	no	-	PREDICTED: receptor tyrosine-protein kinase erbB-4-like, partial [Notothenia coriiceps]	ko03013//RNA transport//Translation//Genetic Information Processing	-	-	-
Unigene0000228	1697	1793.33333333333	15.4521	13.2918	9.5008	10.1829	6.4740	12.6457	12.7482333333333	9.76753333333333	-0.384231151424151	0.302850788538727	0.995794726109231	no	TINF2	PREDICTED: TERF1-interacting nuclear factor 2-like [Cyprinus carpio]	-	-	-	-
Unigene0000229	37.3333333333333	58	1.6738	2.1261	1.6656	1.7729	3.3178	1.5303	1.82183333333333	2.207	0.276695646422486	0.607557156480896	1	no	-	--	-	-	-	-
Unigene0000230	2.33333333333333	0.666666666666667	0.0000	0.2406	0.4713	0.0807	0.0974	0.0000	0.2373	0.0593666666666667	-1.99898708481348	0.326535247288204	0.999845213278851	no	-	--	-	-	-	-
Unigene0000231	23.3333333333333	22	2.1434	1.4559	1.5007	1.3868	1.0550	1.1306	1.7	1.1908	-0.51360361967439	0.373252695237008	1	no	-	--	-	-	-	-
Unigene0000232	10.6666666666667	23	0.6214	0.3850	0.8547	1.8928	0.8316	0.3874	0.620366666666667	1.03726666666667	0.741593763269289	0.336635849513417	1	no	-	--	-	-	-	-
Unigene0000233	2884.33333333333	3541	21.1461	19.2157	22.6943	16.7386	19.8356	22.6831	21.0187	19.7524333333333	-0.0896430497143988	0.777470750019099	1	no	FBXW5	PREDICTED: F-box/WD repeat-containing protein 5-like [Sinocyclocheilus grahami]	-	GO:0000151//ubiquitin ligase complex;GO:1902494//catalytic complex;GO:1990234//transferase complex;GO:0043234//protein complex;GO:0005623//cell;GO:0005622//intracellular;GO:0031461//cullin-RING ubiquitin ligase complex;GO:0044424//intracellular part;GO:0032991//macromolecular complex;GO:0044464//cell part	-	GO:0009057//macromolecule catabolic process;GO:0006511//ubiquitin-dependent protein catabolic process;GO:0016043//cellular component organization;GO:0044257//cellular protein catabolic process;GO:0043170//macromolecule metabolic process;GO:0044267//cellular protein metabolic process;GO:0044260//cellular macromolecule metabolic process;GO:0006508//proteolysis;GO:0007098//centrosome cycle;GO:002240…
Unigene0000234	605.666666666667	846.333333333333	2.3808	2.6464	2.0700	2.8616	2.4676	2.1237	2.36573333333333	2.4843	0.0705519400467673	0.844502159239021	1	no	nav3	PREDICTED: LOW QUALITY PROTEIN: neuron navigator 3 [Sinocyclocheilus grahami]	-	-	-	-
Unigene0000235	1	8	0.2021	0.0000	0.0736	1.3850	0.0000	0.1260	0.0919	0.503666666666667	2.454332488042	0.151355359232655	0.886701627661026	no	-	PREDICTED: vegetative cell wall protein gp1-like [Sinocyclocheilus rhinocerous]	-	-	-	-
Unigene0000236	9.66666666666667	8	1.1047	0.5476	0.3218	0.4130	0.2772	0.4591	0.658033333333333	0.3831	-0.78043964120276	0.304507685858525	0.996294298778444	no	-	--	-	-	-	-
Unigene0000237	27.6666666666667	34.6666666666667	0.7789	0.8325	1.1343	0.9220	1.2312	0.5826	0.915233333333333	0.911933333333333	-0.00521123649892278	1	1	no	-	--	-	-	-	-
Unigene0000238	114.333333333333	217	2.3652	1.9683	3.6047	6.1346	3.4988	2.1259	2.64606666666667	3.91976666666667	0.566918366839684	0.258839425674749	0.973639051457246	no	-	--	-	-	-	-
Unigene0000239	13.6666666666667	50.3333333333333	0.5034	0.5849	0.4276	2.1694	0.9473	0.9937	0.5053	1.37013333333333	1.4391042095617	0.01573607115705	0.453961567252728	no	Hfe2	PREDICTED: hemojuvelin-like [Sinocyclocheilus rhinocerous]	-	-	-	GO:0044707//single-multicellular organism process;GO:0032502//developmental process;GO:0048856//anatomical structure development;GO:0007275//multicellular organism development;GO:0009790//embryo development;GO:0048568//embryonic organ development;GO:0044699//single-organism process;GO:0048731//system development;GO:0032501//multicellular organismal process;GO:0048513//animal organ development;GO:…
Unigene0000240	227.666666666667	770	1.1066	4.0931	1.6033	8.5901	4.4964	3.9417	2.26766666666667	5.67606666666667	1.32368294588373	0.0105335015710686	0.399228847850723	no	PAPSS2	PREDICTED: bifunctional 3'-phosphoadenosine 5'-phosphosulfate synthase 2-like [Sinocyclocheilus grahami]	ko01100//Metabolic pathways//Global and Overview//Metabolism;ko01130//Biosynthesis of antibiotics//Global and Overview//Metabolism;ko00230//Purine metabolism//Nucleotide metabolism//Metabolism;ko01120//Microbial metabolism in diverse environments//Global and Overview//Metabolism;ko00450//Selenocompound metabolism//Metabolism of other amino acids//Metabolism;ko00920//Sulfur metabolism//Energy meta…	-	GO:0001883//purine nucleoside binding;GO:0016740//transferase activity;GO:0032550//purine ribonucleoside binding;GO:0032549//ribonucleoside binding;GO:0016301//kinase activity;GO:0004779//sulfate adenylyltransferase activity;GO:0016779//nucleotidyltransferase activity;GO:0097367//carbohydrate derivative binding;GO:0097159//organic cyclic compound binding;GO:0036094//small molecule binding;GO:0005…	GO:0008152//metabolic process;GO:0044237//cellular metabolic process;GO:0009987//cellular process;GO:0006790//sulfur compound metabolic process
Unigene0000241	40.3333333333333	43.3333333333333	0.9848	0.5572	0.7327	0.5469	0.5640	0.7207	0.758233333333333	0.610533333333333	-0.312571817142577	0.552448430231949	1	no	CHRNA9	PREDICTED: neuronal acetylcholine receptor subunit alpha-9-II-like [Sinocyclocheilus anshuiensis]	ko04080//Neuroactive ligand-receptor interaction//Signaling molecules and interaction//Environmental Information Processing	GO:0097060//synaptic membrane;GO:0016020//membrane;GO:0005886//plasma membrane;GO:0045202//synapse;GO:0031224//intrinsic component of membrane;GO:0098805//whole membrane;GO:0098590//plasma membrane region;GO:0044456//synapse part;GO:0044464//cell part;GO:0071944//cell periphery;GO:0044459//plasma membrane part;GO:0005623//cell;GO:0098589//membrane region;GO:0044425//membrane part	GO:0005216//ion channel activity;GO:0022836//gated channel activity;GO:0022857//transmembrane transporter activity;GO:0022892//substrate-specific transporter activity;GO:0015276//ligand-gated ion channel activity;GO:0060089//molecular transducer activity;GO:0004872//receptor activity;GO:0022838//substrate-specific channel activity;GO:0022834//ligand-gated channel activity;GO:0099600//transmembran…	GO:0044763//single-organism cellular process;GO:0048562//embryonic organ morphogenesis;GO:0030003//cellular cation homeostasis;GO:0072503//cellular divalent inorganic cation homeostasis;GO:0007275//multicellular organism development;GO:0009790//embryo development;GO:0044699//single-organism process;GO:0055080//cation homeostasis;GO:0048513//animal organ development;GO:0098771//inorganic ion homeo…
Unigene0000242	100	212	1.2315	1.2315	1.5437	3.1760	1.9479	1.3896	1.33556666666667	2.17116666666667	0.701018484834706	0.128800641390004	0.857074987634379	no	Jakmip3	PREDICTED: janus kinase and microtubule-interacting protein 3 isoform X2 [Sinocyclocheilus grahami]	-	-	-	-
Unigene0000243	48.6666666666667	59.6666666666667	1.5445	1.1679	0.7434	1.0765	1.0838	0.9465	1.15193333333333	1.0356	-0.15359035471734	0.762562588098406	1	no	Gucy2e	PREDICTED: retinal guanylyl cyclase 2-like [Sinocyclocheilus grahami]	-	GO:0031224//intrinsic component of membrane;GO:0016020//membrane;GO:0044425//membrane part	GO:1901363//heterocyclic compound binding;GO:0016740//transferase activity;GO:0009975//cyclase activity;GO:0005488//binding;GO:0036094//small molecule binding;GO:0016829//lyase activity;GO:0097159//organic cyclic compound binding;GO:0003824//catalytic activity;GO:0016301//kinase activity;GO:0032550//purine ribonucleoside binding;GO:0032549//ribonucleoside binding;GO:0001883//purine nucleoside bin…	GO:0044763//single-organism cellular process;GO:1901360//organic cyclic compound metabolic process;GO:0034641//cellular nitrogen compound metabolic process;GO:0006793//phosphorus metabolic process;GO:0051716//cellular response to stimulus;GO:0009987//cellular process;GO:0009058//biosynthetic process;GO:0007154//cell communication;GO:0044711//single-organism biosynthetic process;GO:0046483//hetero…
Unigene0000244	12	16	1.0600	0.4667	0.3250	0.4171	0.9240	0.4869	0.617233333333333	0.609333333333333	-0.0185843113713148	1	1	no	-	PREDICTED: fibroleukin-like [Cyprinus carpio]	-	-	-	-
Unigene0000245	7.33333333333333	9.66666666666667	0.2986	0.6244	0.4892	0.8371	0.2247	0.3257	0.470733333333333	0.4625	-0.0254566504149981	1	1	no	-	--	-	-	-	-
Unigene0000246	25.6666666666667	33.3333333333333	2.1911	0.5940	3.0580	2.6735	1.6494	1.6504	1.9477	1.9911	0.0317942007155419	0.978463988489021	1	no	-	--	-	-	-	-
Unigene0000247	9	19	0.5099	0.5416	0.6364	0.3631	0.7676	1.5891	0.562633333333333	0.9066	0.688271133260014	0.370586675032738	1	no	-	--	-	-	-	-
Unigene0000248	847.333333333333	1050.33333333333	12.3393	15.4942	12.4154	9.4606	12.9440	15.4065	13.4163	12.6037	-0.0901395341980128	0.803850295632919	1	no	RGP1	PREDICTED: RAB6A-GEF complex partner protein 2-like isoform X1 [Cyprinus carpio]	-	-	-	-
Unigene0000249	14	16.6666666666667	1.4331	0.9990	0.9131	0.9487	1.2136	0.8375	1.11506666666667	0.999933333333333	-0.157226150235621	0.83376135761396	1	no	Gripap1	PREDICTED: GRIP1-associated protein 1 [Astyanax mexicanus]	-	-	-	-
Unigene0000250	220.666666666667	139	7.5616	5.7557	4.9849	1.7256	5.7624	1.5906	6.10073333333333	3.0262	-1.01147533332116	0.0601489193241312	0.69340988228963	no	Cldn4	PREDICTED: claudin-4-like [Sinocyclocheilus anshuiensis]	ko04530//Tight junction//Cellular commiunity//Cellular Processes;ko04514//Cell adhesion molecules (CAMs)//Signaling molecules and interaction//Environmental Information Processing	GO:0031224//intrinsic component of membrane;GO:0005911//cell-cell junction;GO:0016020//membrane;GO:0030054//cell junction;GO:0043296//apical junction complex;GO:0044425//membrane part	-	GO:0044767//single-organism developmental process;GO:0044707//single-multicellular organism process;GO:0048731//system development;GO:0007275//multicellular organism development;GO:0044699//single-organism process;GO:0032502//developmental process;GO:0048856//anatomical structure development;GO:0048513//animal organ development;GO:0032501//multicellular organismal process;GO:0007423//sensory orga…
Unigene0000251	16.3333333333333	10.6666666666667	2.3239	0.2817	1.6921	0.5036	0.5324	1.0707	1.43256666666667	0.702233333333333	-1.02857989431772	0.20059618986312	0.933956123708219	no	-	--	-	-	-	-
Unigene0000252	9.33333333333333	16.3333333333333	0.4657	1.0099	0.4521	0.8221	0.8179	0.8709	0.642566666666667	0.836966666666667	0.38132402410767	0.627901977736003	1	no	-	PREDICTED: uncharacterized protein LOC101477648 [Maylandia zebra]	-	-	-	-
Unigene0000253	17.6666666666667	12.6666666666667	1.4440	1.6777	0.4206	0.2699	0.9783	0.6301	1.18076666666667	0.6261	-0.915258893118532	0.218972209429635	0.946155526119215	no	-	--	-	-	-	-
Unigene0000254	1537	1692	38.1574	34.2487	38.9675	33.6560	35.4166	25.1936	37.1245333333333	31.4220666666667	-0.240594819392237	0.474374125846234	1	no	cript	PREDICTED: cysteine-rich PDZ-binding protein [Sinocyclocheilus grahami]	-	GO:0005622//intracellular;GO:0044464//cell part;GO:0044424//intracellular part;GO:0005623//cell	-	-
Unigene0000255	59.6666666666667	109	1.7687	1.9036	3.2876	2.9581	4.4848	2.8145	2.31996666666667	3.41913333333333	0.559526606718915	0.256080286495718	0.971522979819351	no	-	--	-	-	-	-
Unigene0000256	25.6666666666667	22.3333333333333	1.4514	1.4053	1.2330	0.9797	0.9105	0.7917	1.36323333333333	0.893966666666667	-0.608739573655588	0.273775347066308	0.983839344944986	no	-	--	-	-	-	-
Unigene0000257	16.6666666666667	6.66666666666667	1.8198	1.5134	0.9764	0.6565	0.5047	0.1194	1.43653333333333	0.426866666666667	-1.75073405521365	0.017594696843133	0.473961222077546	no	-	--	-	-	-	-
Unigene0000258	29	30.3333333333333	1.3137	1.2999	0.7097	0.3433	1.7865	0.5812	1.10776666666667	0.903666666666667	-0.293791420292631	0.686265806318357	1	no	Adm2	PREDICTED: ADM2-like [Sinocyclocheilus rhinocerous]	-	-	-	-
Unigene0000259	19	12.6666666666667	1.5307	1.7785	0.6688	0.5246	0.8066	0.6202	1.326	0.650466666666667	-1.02753374278274	0.117396726873536	0.835830653968928	no	-	--	-	-	-	-
Unigene0000260	1480	1735	13.7511	16.0356	16.4569	12.5847	14.5864	14.5025	15.4145333333333	13.8912	-0.150119980477417	0.649170492954658	1	no	slc30a5	PREDICTED: zinc transporter 5-like [Sinocyclocheilus rhinocerous]	-	GO:0044425//membrane part;GO:0031224//intrinsic component of membrane;GO:0043226//organelle;GO:0043229//intracellular organelle;GO:0005623//cell;GO:0044424//intracellular part;GO:0044464//cell part;GO:0043227//membrane-bounded organelle;GO:0016020//membrane;GO:0005622//intracellular;GO:0043231//intracellular membrane-bounded organelle	GO:0022890//inorganic cation transmembrane transporter activity;GO:0046915//transition metal ion transmembrane transporter activity;GO:0015075//ion transmembrane transporter activity;GO:0022857//transmembrane transporter activity;GO:0022892//substrate-specific transporter activity;GO:0046873//metal ion transmembrane transporter activity;GO:0022891//substrate-specific transmembrane transporter act…	GO:0006811//ion transport;GO:0044699//single-organism process;GO:0006829//zinc II ion transport;GO:0070838//divalent metal ion transport;GO:0006810//transport;GO:0030001//metal ion transport;GO:0051179//localization;GO:0006812//cation transport;GO:0044763//single-organism cellular process;GO:0009987//cellular process;GO:0072511//divalent inorganic cation transport;GO:1902578//single-organism loca…
Unigene0000261	7.66666666666667	67.3333333333333	0.3652	1.2729	0.2659	0.0000	1.3745	10.3578	0.634666666666667	3.91076666666667	2.62338048325865	0.0287451174243344	0.556586491602844	no	fxyd2	PREDICTED: sodium/potassium-transporting ATPase subunit gamma-like [Sinocyclocheilus anshuiensis]	-	-	-	-
Unigene0000262	165.666666666667	224.666666666667	1.5798	2.0514	1.4464	1.9107	1.5040	1.7234	1.69253333333333	1.7127	0.0170882211547135	0.970889646407179	1	no	Unc13b	PREDICTED: protein unc-13 homolog B-like isoform X2 [Cyprinus carpio]	-	-	-	-
Unigene0000263	91.3333333333333	113	4.6127	5.1448	6.7692	5.3058	4.6475	5.8393	5.5089	5.2642	-0.0655499730261676	0.896207019993754	1	no	-	--	-	-	-	-
Unigene0000264	37	61.3333333333333	0.7562	0.5574	1.1202	0.7148	1.2365	1.2516	0.811266666666667	1.06763333333333	0.396168137431765	0.467701343658834	1	no	CYP21A2	PREDICTED: steroid 21-hydroxylase-like [Sinocyclocheilus anshuiensis]	ko01100//Metabolic pathways//Global and Overview//Metabolism;ko00140//Steroid hormone biosynthesis//Lipid metabolism//Metabolism	-	GO:0046914//transition metal ion binding;GO:1901363//heterocyclic compound binding;GO:0043169//cation binding;GO:0097159//organic cyclic compound binding;GO:0003824//catalytic activity;GO:0016491//oxidoreductase activity;GO:0046906//tetrapyrrole binding;GO:0046872//metal ion binding;GO:0043167//ion binding;GO:0005488//binding	GO:0044710//single-organism metabolic process;GO:0044699//single-organism process;GO:0008152//metabolic process
Unigene0000265	44	60	1.2003	0.9252	1.2151	0.8208	1.4104	1.2957	1.11353333333333	1.17563333333333	0.0782934246760345	0.893796457846614	1	no	adprhl1	PREDICTED: protein ADP-ribosylarginine hydrolase-like protein 1 [Sinocyclocheilus anshuiensis]	-	-	GO:0005488//binding;GO:0043169//cation binding;GO:0043167//ion binding;GO:0046872//metal ion binding;GO:0016799//hydrolase activity, hydrolyzing N-glycosyl compounds;GO:0003824//catalytic activity;GO:0016798//hydrolase activity, acting on glycosyl bonds;GO:0016787//hydrolase activity	GO:0006464//cellular protein modification process;GO:0044260//cellular macromolecule metabolic process;GO:0044237//cellular metabolic process;GO:0009987//cellular process;GO:0043412//macromolecule modification;GO:0019538//protein metabolic process;GO:0071704//organic substance metabolic process;GO:0044238//primary metabolic process;GO:0036211//protein modification process;GO:0008152//metabolic pr…
Unigene0000266	8.66666666666667	11	1.1978	1.1134	0.1454	0.8085	0.1503	1.1201	0.818866666666667	0.692966666666667	-0.240842604765509	0.822896067253013	1	no	-	--	-	-	-	-
Unigene0000267	103.333333333333	86.6666666666667	6.1212	4.1338	3.0991	4.6482	1.8719	1.5502	4.45136666666667	2.6901	-0.726588539365762	0.183033349774803	0.920860745423089	no	-	--	-	-	-	-
Unigene0000268	13.3333333333333	12	1.3082	0.9727	0.8256	0.9781	0.8534	0.2718	1.0355	0.7011	-0.562635413603893	0.42979753539652	1	no	-	--	-	-	-	-
Unigene0000269	27.3333333333333	34.6666666666667	1.0943	1.3803	2.7888	1.8506	1.0002	2.3874	1.75446666666667	1.74606666666667	-0.00692389441851364	0.999999999999999	1	no	-	--	-	-	-	-
Unigene0000270	224.333333333333	260	1.8218	1.3074	1.8017	1.2460	1.2375	1.8488	1.64363333333333	1.4441	-0.186717845770082	0.655044046243907	1	no	Kirrel	PREDICTED: kin of IRRE-like protein 1 isoform X1 [Sinocyclocheilus rhinocerous]	-	-	-	GO:0044707//single-multicellular organism process;GO:0072010//glomerular epithelium development;GO:0072001//renal system development;GO:0016043//cellular component organization;GO:0048731//system development;GO:0044767//single-organism developmental process;GO:0048513//animal organ development;GO:0032501//multicellular organismal process;GO:0072073//kidney epithelium development;GO:0044763//singl…
Unigene0000271	1086.33333333333	802.333333333333	23.0117	19.8527	9.8596	11.6474	8.0392	8.3521	17.5746666666667	9.34623333333333	-0.911040366041713	0.0241001294749147	0.523632050815501	no	Pim1	PREDICTED: serine/threonine-protein kinase pim-2-like [Sinocyclocheilus rhinocerous]	-	-	-	-
Unigene0000272	1674.66666666667	2114.33333333333	23.1910	23.2968	31.4027	21.0339	30.8618	25.3188	25.9635	25.7381666666667	-0.0125755845753473	0.970797953902608	1	no	UMPS	PREDICTED: uridine 5'-monophosphate synthase [Sinocyclocheilus rhinocerous]	ko01100//Metabolic pathways//Global and Overview//Metabolism;ko00240//Pyrimidine metabolism//Nucleotide metabolism//Metabolism;ko00983//Drug metabolism - other enzymes//Xenobiotics biodegradation and metabolism//Metabolism	-	GO:0016757//transferase activity, transferring glycosyl groups;GO:0016830//carbon-carbon lyase activity;GO:0016740//transferase activity;GO:0016831//carboxy-lyase activity;GO:0016763//transferase activity, transferring pentosyl groups;GO:0003824//catalytic activity;GO:0016829//lyase activity	GO:0019637//organophosphate metabolic process;GO:0006220//pyrimidine nucleotide metabolic process;GO:0019438//aromatic compound biosynthetic process;GO:0044281//small molecule metabolic process;GO:0044763//single-organism cellular process;GO:0042455//ribonucleoside biosynthetic process;GO:0008152//metabolic process;GO:0046390//ribose phosphate biosynthetic process;GO:0006221//pyrimidine nucleotid…
Unigene0000273	15.3333333333333	13	0.6287	0.9183	1.8311	1.2311	0.4732	0.5599	1.12603333333333	0.754733333333333	-0.577210636964474	0.414214865075629	1	no	-	--	-	-	-	-
Unigene0000274	12	21.6666666666667	0.5603	0.2604	0.4372	0.6484	0.4519	0.5988	0.4193	0.566366666666667	0.43375352836898	0.484267383292005	1	no	UCN3	PREDICTED: urocortin-3-like [Sinocyclocheilus rhinocerous]	ko04080//Neuroactive ligand-receptor interaction//Signaling molecules and interaction//Environmental Information Processing	GO:0044421//extracellular region part;GO:0005576//extracellular region	-	GO:0032501//multicellular organismal process;GO:0044699//single-organism process;GO:0050896//response to stimulus;GO:0044707//single-multicellular organism process
Unigene0000275	1127.33333333333	799.333333333333	10.8496	9.3357	9.8976	3.5770	4.0222	8.3334	10.0276333333333	5.31086666666667	-0.916961934159553	0.0229765821421654	0.516037941029941	no	DNAJB5	PREDICTED: dnaJ homolog subfamily B member 5-like isoform X1 [Sinocyclocheilus rhinocerous]	-	-	GO:0005488//binding;GO:0005515//protein binding	-
Unigene0000276	83	13.6666666666667	5.0164	1.0228	1.4140	0.3630	0.2923	0.2219	2.4844	0.2924	-3.08688225649427	9.27121845298286e-06	0.00586454765835148	yes	-	PREDICTED: uncharacterized protein LOC109202850 [Oreochromis niloticus]	-	-	-	-
Unigene0000277	11.6666666666667	20.3333333333333	0.8192	0.2077	1.1388	1.0672	0.2803	1.5320	0.7219	0.959833333333333	0.4109849121847	0.609713299020837	1	no	-	--	-	-	-	-
Unigene0000278	47.6666666666667	57.3333333333333	1.3521	0.8871	1.0811	1.0077	1.4369	0.6446	1.10676666666667	1.02973333333333	-0.104080323201468	0.844057795233957	1	no	-	--	-	-	-	-
Unigene0000279	812.333333333333	905	16.3719	13.3944	16.6867	12.5347	11.9592	14.8485	15.4843333333333	13.1141333333333	-0.239686802024977	0.493171579046141	1	no	Mrgbp	PREDICTED: MRG/MORF4L-binding protein isoform X1 [Danio rerio]	-	GO:0031248//protein acetyltransferase complex;GO:0044424//intracellular part;GO:0005623//cell;GO:0043231//intracellular membrane-bounded organelle;GO:1990234//transferase complex;GO:0044428//nuclear part;GO:0070013//intracellular organelle lumen;GO:0005622//intracellular;GO:0005634//nucleus;GO:1902493//acetyltransferase complex;GO:0005654//nucleoplasm;GO:0031974//membrane-enclosed lumen;GO:004322…	-	GO:0032774//RNA biosynthetic process;GO:0009058//biosynthetic process;GO:0034645//cellular macromolecule biosynthetic process;GO:0044260//cellular macromolecule metabolic process;GO:0046483//heterocycle metabolic process;GO:0008152//metabolic process;GO:0006351//transcription, DNA-templated;GO:0016070//RNA metabolic process;GO:0018130//heterocycle biosynthetic process;GO:0034641//cellular nitroge…
Unigene0000280	38	83	0.3996	1.9499	0.2546	3.2210	0.3572	0.3581	0.868033333333333	1.3121	0.596055327523889	0.506899343873977	1	no	F2RL2	PREDICTED: proteinase-activated receptor 3 [Danio rerio]	ko04080//Neuroactive ligand-receptor interaction//Signaling molecules and interaction//Environmental Information Processing	GO:0044425//membrane part;GO:0031224//intrinsic component of membrane;GO:0016020//membrane	GO:0016787//hydrolase activity;GO:0004871//signal transducer activity;GO:0008528//G-protein coupled peptide receptor activity;GO:0060089//molecular transducer activity;GO:0004930//G-protein coupled receptor activity;GO:0001653//peptide receptor activity;GO:0003824//catalytic activity;GO:0099600//transmembrane receptor activity;GO:0004888//transmembrane signaling receptor activity;GO:0004872//rece…	GO:0007186//G-protein coupled receptor signaling pathway;GO:0050789//regulation of biological process;GO:0008152//metabolic process;GO:0051604//protein maturation;GO:0051716//cellular response to stimulus;GO:0007165//signal transduction;GO:0007154//cell communication;GO:0044700//single organism signaling;GO:0010467//gene expression;GO:0043170//macromolecule metabolic process;GO:0050794//regulatio…
Unigene0000281	4.33333333333333	9.33333333333333	0.2345	0.3632	0.2846	0.2922	0.8237	0.3898	0.2941	0.5019	0.771093161872445	0.394045934540552	1	no	drl	PREDICTED: gastrula zinc finger protein XlCGF8.2DB-like [Sinocyclocheilus grahami]	-	-	-	-
Unigene0000282	8	15.6666666666667	0.0000	1.1509	0.3713	1.0892	0.9321	0.2724	0.5074	0.764566666666667	0.591518783984176	0.549168979680711	1	no	-	--	-	-	-	-
Unigene0000283	111.333333333333	247	0.4883	0.7710	0.6673	0.8003	1.3647	1.1593	0.6422	1.1081	0.786993512469016	0.0744788051259956	0.740754837654981	no	HMCN1	PREDICTED: hemicentin-1-like [Sinocyclocheilus rhinocerous]	-	-	-	GO:0048856//anatomical structure development;GO:0032502//developmental process;GO:0007275//multicellular organism development;GO:0033333//fin development;GO:0044767//single-organism developmental process;GO:0044699//single-organism process;GO:0044707//single-multicellular organism process;GO:0032501//multicellular organismal process;GO:0048736//appendage development
Unigene0000284	335.333333333333	389.666666666667	7.8431	6.6420	7.3247	6.1589	5.8478	7.1398	7.26993333333333	6.38216666666667	-0.187895850145747	0.618820387076462	1	no	-	--	-	-	-	-
Unigene0000285	14.6666666666667	14.6666666666667	1.2689	1.1794	0.5435	0.5581	0.6181	0.9771	0.997266666666667	0.717766666666667	-0.474464403883348	0.50653729147051	1	no	-	--	-	-	-	-
Unigene0000286	160	247	2.9177	3.0965	3.0600	3.9886	4.3108	2.4975	3.02473333333333	3.59896666666667	0.250774783148621	0.55200885967225	1	no	-	--	-	-	-	-
Unigene0000287	10	14	1.1527	0.3348	0.4721	0.3591	0.5423	1.0778	0.6532	0.659733333333333	0.0143582086935177	1	1	no	-	--	-	-	-	-
Unigene0000288	8.33333333333333	15.6666666666667	0.7108	0.2477	0.9057	0.4982	1.3376	0.9969	0.6214	0.944233333333333	0.603621172414002	0.444136638838996	1	no	-	--	-	-	-	-
Unigene0000289	316.666666666667	302	4.5348	4.4942	3.5645	4.9961	2.1929	1.6662	4.19783333333333	2.95173333333333	-0.508082497658751	0.275988644763797	0.984040480583631	no	-	--	-	-	-	-
Unigene0000290	7.33333333333333	15	0.1534	0.6417	0.6145	1.0993	0.8662	0.3347	0.469866666666667	0.766733333333333	0.706473478087263	0.384114907583612	1	no	-	--	-	-	-	-
Unigene0000291	1058	1568.66666666667	5.2589	6.6090	5.5490	9.3001	5.1534	4.9036	5.80563333333333	6.45236666666667	0.152374965931873	0.68422754460576	1	no	GK	PREDICTED: glycerol kinase-like isoform X5 [Sinocyclocheilus anshuiensis]	ko01100//Metabolic pathways//Global and Overview//Metabolism;ko03320//PPAR signaling pathway//Endocrine system//Organismal Systems;ko00561//Glycerolipid metabolism//Lipid metabolism//Metabolism	-	-	-
Unigene0000292	12.6666666666667	15.3333333333333	1.7229	0.7536	0.9594	0.4420	1.5258	1.2004	1.1453	1.05606666666667	-0.117024636458161	0.920054241908332	1	no	-	--	-	-	-	-
Unigene0000293	288.333333333333	315.333333333333	1.4589	2.0565	1.6816	1.3312	1.5719	1.4439	1.73233333333333	1.449	-0.257658963389814	0.509241640934861	1	no	TTLL7	PREDICTED: tubulin polyglutamylase TTLL7 [Sinocyclocheilus rhinocerous]	-	-	-	GO:0018193//peptidyl-amino acid modification;GO:0043412//macromolecule modification;GO:0044238//primary metabolic process;GO:0009987//cellular process;GO:0008152//metabolic process;GO:0071704//organic substance metabolic process;GO:0044260//cellular macromolecule metabolic process;GO:0019538//protein metabolic process;GO:0043170//macromolecule metabolic process;GO:0018200//peptidyl-glutamic acid …
Unigene0000294	6.33333333333333	5.66666666666667	0.7628	0.0000	0.6172	0.3169	0.4466	0.2113	0.46	0.324933333333333	-0.501490110829555	0.675248815750376	1	no	-	--	-	-	-	-
Unigene0000295	50.3333333333333	65	2.3719	3.1844	3.0224	1.7652	3.4717	3.3678	2.85956666666667	2.86823333333333	0.00436585305454763	1	1	no	-	PREDICTED: SH3 domain-containing protein C23A1.17-like [Sinocyclocheilus anshuiensis]	-	-	-	-
Unigene0000296	49	95.3333333333333	5.8185	6.2312	4.4210	5.2804	9.3313	9.5409	5.49023333333333	8.05086666666667	0.552276631415506	0.264658176574786	0.978510539244042	no	-	--	-	-	-	-
Unigene0000297	29.6666666666667	65	2.7072	1.6486	2.7870	3.8389	6.0435	2.5023	2.38093333333333	4.12823333333333	0.793997290751866	0.150918154482297	0.886337747997121	no	Wfdc3	PREDICTED: WAP four-disulfide core domain protein 3-like [Sinocyclocheilus anshuiensis]	-	-	-	-
Unigene0000298	560.333333333333	741	7.5987	6.0686	9.2527	8.2555	8.6761	6.6773	7.64	7.86963333333333	0.0427237801267645	0.909437337033576	1	no	Rpp40	PREDICTED: ribonuclease P protein subunit p40-like [Sinocyclocheilus rhinocerous]	ko03013//RNA transport//Translation//Genetic Information Processing;ko03008//Ribosome biogenesis in eukaryotes//Translation//Genetic Information Processing	-	-	-
Unigene0000299	144.666666666667	207.333333333333	1.1103	1.8239	1.8425	2.9280	1.4383	0.8853	1.59223333333333	1.75053333333333	0.136742762895704	0.79168526656222	1	no	-	PREDICTED: CCR4-NOT transcription complex subunit 6-like isoform X4 [Sinocyclocheilus grahami]	-	-	-	-
Unigene0000300	8.33333333333333	15.3333333333333	0.1848	0.9733	0.2243	0.6525	0.0000	1.1136	0.4608	0.5887	0.353391910870436	0.731899032584974	1	no	-	PREDICTED: uncharacterized protein LOC101885994 [Danio rerio]	-	-	-	-
Unigene0000301	206.333333333333	272	13.8800	11.4515	16.0687	10.2514	15.9073	16.2353	13.8000666666667	14.1313333333333	0.034222358134536	0.940606844117475	1	no	-	--	-	-	-	-
Unigene0000302	15.6666666666667	9.33333333333333	0.7707	1.1939	1.4342	0.5336	0.9669	0.1601	1.13293333333333	0.553533333333333	-1.03332086660563	0.158591043108138	0.894395889734871	no	-	PREDICTED: RNA-directed DNA polymerase from mobile element jockey-like [Danio rerio]	-	-	-	-
Unigene0000303	93.6666666666667	161.333333333333	0.8952	0.5332	0.7088	0.9423	1.0141	0.8398	0.7124	0.932066666666667	0.387745631819482	0.378170867136522	1	no	LRFN2	PREDICTED: leucine-rich repeat and fibronectin type-III domain-containing protein 2-like [Sinocyclocheilus grahami]	-	-	-	-
Unigene0000304	171.666666666667	203.333333333333	12.2809	11.3309	16.0438	17.8917	11.2159	7.1489	13.2185333333333	12.0855	-0.129284949666328	0.784167913653748	1	no	-	--	-	-	-	-
Unigene0000305	2934.33333333333	3489.33333333333	21.8500	21.2928	21.2565	23.0301	17.4786	17.3020	21.4664333333333	19.2702333333333	-0.155708465474862	0.622469817326901	1	no	GANAB	PREDICTED: neutral alpha-glucosidase AB-like isoform X1 [Sinocyclocheilus grahami]	ko01100//Metabolic pathways//Global and Overview//Metabolism;ko04141//Protein processing in endoplasmic reticulum//Folding, sorting and degradation//Genetic Information Processing;ko00510//N-Glycan biosynthesis//Glycan biosynthesis and metabolism//Metabolism	-	-	-
Unigene0000306	572.666666666667	851.666666666667	12.9790	13.0099	15.7307	16.4202	16.0920	15.2825	13.9065333333333	15.9315666666667	0.19612531961843	0.577500645643826	1	no	-	PREDICTED: TBC1 domain family member 5-like [Sinocyclocheilus grahami]	-	-	GO:0030234//enzyme regulator activity;GO:0005096//GTPase activator activity;GO:0008047//enzyme activator activity;GO:0030695//GTPase regulator activity;GO:0060589//nucleoside-triphosphatase regulator activity;GO:0098772//molecular function regulator	-
Unigene0000307	4	7	0.0000	0.2421	0.3793	0.4868	0.1960	0.2029	0.207133333333333	0.295233333333333	0.511295877407008	0.696559498591881	1	no	-	--	-	-	-	-
Unigene0000308	648.333333333333	718.666666666667	4.7420	3.1715	3.5752	3.1345	2.6797	3.6720	3.82956666666667	3.16206666666667	-0.276313368983195	0.452882726660299	1	no	nphp3	PREDICTED: nephrocystin-3-like [Sinocyclocheilus anshuiensis]	-	-	-	GO:0044767//single-organism developmental process;GO:0048568//embryonic organ development;GO:0048856//anatomical structure development;GO:0032501//multicellular organismal process;GO:0009888//tissue development;GO:0002009//morphogenesis of an epithelium;GO:0009887//organ morphogenesis;GO:0060429//epithelium development;GO:0060562//epithelial tube morphogenesis;GO:0072359//circulatory system devel…
Unigene0000309	5.66666666666667	11	0.5052	0.9391	0.1471	0.5666	0.6845	0.9448	0.530466666666667	0.731966666666667	0.464515852244263	0.598036363685658	1	no	-	--	-	-	-	-
Unigene0000310	25.6666666666667	8.33333333333333	3.9956	1.2380	0.5134	0.0976	0.9436	0.3419	1.91566666666667	0.461033333333333	-2.05490358011187	0.0223539550356879	0.511375745698372	no	-	Retrovirus-related Pol polyprotein LINE-1 [Larimichthys crocea]	-	-	-	-
Unigene0000311	10.6666666666667	24	0.9030	1.0072	0.6575	1.1253	1.4275	1.7450	0.8559	1.4326	0.743121694409374	0.210585043198014	0.93999389874392	no	PEG10	PREDICTED: C-Jun-amino-terminal kinase-interacting protein 1-like [Cyprinus carpio]	-	-	-	-
Unigene0000312	947.666666666667	1443.33333333333	8.0123	8.2455	8.6226	6.7989	10.4275	11.8347	8.29346666666667	9.68703333333333	0.224079632130395	0.53072646099513	1	no	samhd1	PREDICTED: deoxynucleoside triphosphate triphosphohydrolase SAMHD1 isoform X1 [Sinocyclocheilus rhinocerous]	-	GO:0005622//intracellular;GO:0043227//membrane-bounded organelle;GO:0005623//cell;GO:0044424//intracellular part;GO:0043231//intracellular membrane-bounded organelle;GO:0043226//organelle;GO:0043229//intracellular organelle;GO:0044464//cell part	GO:0042578//phosphoric ester hydrolase activity;GO:0032560//guanyl deoxyribonucleotide binding;GO:0046872//metal ion binding;GO:0017076//purine nucleotide binding;GO:0097159//organic cyclic compound binding;GO:0016787//hydrolase activity;GO:0005488//binding;GO:0043167//ion binding;GO:0046914//transition metal ion binding;GO:0003676//nucleic acid binding;GO:1901265//nucleoside phosphate binding;GO…	GO:0009166//nucleotide catabolic process;GO:0046386//deoxyribose phosphate catabolic process;GO:1901564//organonitrogen compound metabolic process;GO:0019637//organophosphate metabolic process;GO:0072521//purine-containing compound metabolic process;GO:0046483//heterocycle metabolic process;GO:0009394//2'-deoxyribonucleotide metabolic process;GO:0006163//purine nucleotide metabolic process;GO:190…
Unigene0000313	7.66666666666667	18.3333333333333	0.4431	0.5765	0.7097	0.8282	0.5336	1.7676	0.576433333333333	1.04313333333333	0.855697905395696	0.241643745427947	0.959969853924484	no	-	--	-	-	-	-
Unigene0000314	15.6666666666667	17	0.5958	1.4536	0.9761	0.8816	0.6167	0.9749	1.0085	0.8244	-0.290794673961067	0.65827774034944	1	no	-	--	-	-	-	-
Unigene0000315	8.66666666666667	13.3333333333333	0.8698	0.0000	1.0134	1.2465	0.5238	0.4880	0.627733333333333	0.752766666666667	0.262050925707456	0.793506063676587	1	no	-	--	-	-	-	-
Unigene0000316	23	28.3333333333333	2.6095	1.3744	1.3934	1.9510	1.2441	1.6267	1.79243333333333	1.60726666666667	-0.157310150267419	0.813925331456646	1	no	-	--	-	-	-	-
Unigene0000317	66.3333333333333	74.6666666666667	3.0784	2.8612	2.4867	2.9669	2.0276	2.0689	2.80876666666667	2.35446666666667	-0.254536482253576	0.59516507087928	1	no	-	--	-	-	-	-
Unigene0000318	0.333333333333333	0	0.1369	0.0000	0.0000	0.0000	0.0000	0.0000	0.0456333333333333	0.001	-5.51201613564938	0.999999999999992	1	no	-	--	-	-	-	-
Unigene0000319	36	64.6666666666667	0.7518	1.1460	0.9197	1.3678	1.2224	1.2560	0.939166666666667	1.28206666666667	0.449018173472757	0.362567851340122	1	no	-	PREDICTED: ATP-binding cassette sub-family G member 2-like [Sinocyclocheilus rhinocerous]	-	-	-	-
Unigene0000320	44	14.3333333333333	1.3082	2.6851	2.1829	0.9849	0.2052	0.3058	2.05873333333333	0.498633333333333	-2.04570573608057	0.00244349180714988	0.217278099898075	no	-	--	-	-	-	-
Unigene0000321	10	28.3333333333333	1.2307	0.5719	0.5761	1.2050	0.9926	2.6303	0.7929	1.6093	1.02122246241306	0.13767873303621	0.86963354096789	no	TY3B-I	PREDICTED: adhesion G protein-coupled receptor E1-like [Danio rerio]	ko03013//RNA transport//Translation//Genetic Information Processing	-	-	-
Unigene0000322	77.3333333333333	62	1.5850	1.1097	1.4539	0.7823	0.7902	0.9495	1.38286666666667	0.840666666666667	-0.718056286379337	0.123959891662192	0.849623647401758	no	IFIT1	PREDICTED: interferon-induced protein with tetratricopeptide repeats 5-like [Cyprinus carpio]	-	-	-	-
Unigene0000323	14.3333333333333	13.3333333333333	1.0855	0.1187	1.1159	0.2785	0.5287	0.8757	0.773366666666667	0.560966666666667	-0.463237536653167	0.558887390057709	1	no	-	--	-	-	-	-
Unigene0000324	136.333333333333	161.333333333333	2.2720	2.9443	2.5452	2.8176	1.7103	2.3559	2.58716666666667	2.2946	-0.173130314598414	0.696323275508117	1	no	FAM46A	PREDICTED: protein FAM46A-like [Sinocyclocheilus rhinocerous]	-	-	-	-
Unigene0000325	3713.66666666667	4259.66666666667	34.2398	35.4851	38.2803	34.5798	33.1217	27.3445	36.0017333333333	31.682	-0.184402956202257	0.551943911586214	1	no	stk3	PREDICTED: serine/threonine-protein kinase 3 [Sinocyclocheilus rhinocerous]	ko04010//MAPK signaling pathway//Signal transduction//Environmental Information Processing	GO:0044424//intracellular part;GO:0005622//intracellular;GO:0005623//cell;GO:0043226//organelle;GO:0043229//intracellular organelle;GO:0043227//membrane-bounded organelle;GO:0043231//intracellular membrane-bounded organelle;GO:0044464//cell part	GO:0016301//kinase activity;GO:0016773//phosphotransferase activity, alcohol group as acceptor;GO:0004672//protein kinase activity;GO:0005488//binding;GO:0001883//purine nucleoside binding;GO:0043169//cation binding;GO:0001882//nucleoside binding;GO:0032550//purine ribonucleoside binding;GO:1901363//heterocyclic compound binding;GO:0003824//catalytic activity;GO:0016740//transferase activity;GO:0…	GO:0012501//programmed cell death;GO:0008219//cell death;GO:0009987//cellular process;GO:0016265//death;GO:0051716//cellular response to stimulus;GO:0044699//single-organism process;GO:0006796//phosphate-containing compound metabolic process;GO:0023052//signaling;GO:0044237//cellular metabolic process;GO:0007154//cell communication;GO:0050789//regulation of biological process;GO:0044763//single-o…
Unigene0000326	2.66666666666667	16.3333333333333	0.5644	0.0000	0.0587	0.5526	1.0319	1.0556	0.2077	0.880033333333333	2.08305695407184	0.0285716485520276	0.555073582855991	no	-	--	-	-	-	-
Unigene0000327	0	2.66666666666667	0.0000	0.0000	0.0000	0.3678	0.0635	0.0000	0.001	0.143766666666667	7.16758540512599	0.0776122263959934	0.748499913847697	no	-	--	-	-	-	-
Unigene0000328	1578.66666666667	1543.66666666667	7.7953	7.9836	8.0565	5.0737	5.7590	6.8862	7.94513333333333	5.9063	-0.427816793280431	0.199106824454187	0.933050859996223	no	Akna	PREDICTED: AT-hook-containing transcription factor-like isoform X2 [Sinocyclocheilus grahami]	-	-	-	-
Unigene0000329	72.3333333333333	93.6666666666667	1.0539	1.5674	1.7054	2.1305	1.0226	1.1242	1.44223333333333	1.42576666666667	-0.0165666941339873	0.980713239044651	1	no	-	--	-	-	-	-
Unigene0000330	203.666666666667	219	8.0383	8.6948	8.2492	7.9958	6.6171	5.7727	8.32743333333333	6.7952	-0.293355885410363	0.468727285679001	1	no	-	--	-	-	-	-
Unigene0000331	131	191.333333333333	1.8442	1.1084	1.7569	2.3932	1.8162	1.0632	1.56983333333333	1.75753333333333	0.162940653028001	0.731056007294738	1	no	TC2N	PREDICTED: tandem C2 domains nuclear protein-like [Sinocyclocheilus rhinocerous]	-	-	-	-
Unigene0000332	6.33333333333333	14.3333333333333	0.1556	0.2169	0.7931	1.0179	0.8199	0.3880	0.388533333333333	0.741933333333333	0.933251182145415	0.2673286309926	0.980958263579588	no	-	--	-	-	-	-
Unigene0000333	85.3333333333333	112	0.7881	0.6715	1.3486	0.8020	1.4041	0.7861	0.936066666666667	0.9974	0.0915609207965332	0.862911953136614	1	no	Adgra1	PREDICTED: adhesion G protein-coupled receptor A1 [Danio rerio]	-	-	-	-
Unigene0000334	5.66666666666667	11.6666666666667	0.4959	0.3073	0.4212	0.6179	0.6843	0.6182	0.408133333333333	0.640133333333333	0.649331891131603	0.393695269806571	1	no	-	--	-	-	-	-
Unigene0000335	5515.66666666667	3982	64.1427	43.2557	37.5791	15.7782	17.3425	42.8887	48.3258333333333	25.3364666666667	-0.931579265165683	0.0257857208147783	0.537203772663785	no	ttll6	PREDICTED: tubulin polyglutamylase ttll6-like [Sinocyclocheilus grahami]	-	GO:0005815//microtubule organizing center;GO:0043229//intracellular organelle;GO:0043232//intracellular non-membrane-bounded organelle;GO:0043226//organelle;GO:0005623//cell;GO:0044424//intracellular part;GO:0043228//non-membrane-bounded organelle;GO:0044422//organelle part;GO:0005622//intracellular;GO:0044446//intracellular organelle part;GO:0044430//cytoskeletal part;GO:0044464//cell part;GO:00…	GO:0070739//protein-glutamic acid ligase activity;GO:0016879//ligase activity, forming carbon-nitrogen bonds;GO:0008092//cytoskeletal protein binding;GO:0005488//binding;GO:0016874//ligase activity;GO:0005515//protein binding;GO:0016881//acid-amino acid ligase activity;GO:0003824//catalytic activity	GO:0018193//peptidyl-amino acid modification;GO:0001578//microtubule bundle formation;GO:0009987//cellular process;GO:0006996//organelle organization;GO:0000226//microtubule cytoskeleton organization;GO:0007017//microtubule-based process;GO:0044238//primary metabolic process;GO:0044763//single-organism cellular process;GO:0071840//cellular component organization or biogenesis;GO:0036211//protein …
Unigene0000336	24	24	0.8681	0.8543	1.3758	1.6862	0.3460	0.3183	1.03273333333333	0.7835	-0.398462597777512	0.574431783192537	1	no	-	--	-	-	-	-
Unigene0000337	27.3333333333333	38	0.8940	0.8309	2.5108	1.6312	1.9708	1.2738	1.4119	1.62526666666667	0.203038537551895	0.753694448532736	1	no	-	--	-	-	-	-
Unigene0000338	183.666666666667	282.666666666667	3.2222	4.0577	1.4254	4.4255	1.3171	3.6393	2.90176666666667	3.1273	0.107986106936459	0.839023121955777	1	no	prodh2	PREDICTED: probable proline dehydrogenase 2 [Sinocyclocheilus grahami]	ko01100//Metabolic pathways//Global and Overview//Metabolism;ko00330//Arginine and proline metabolism//Amino acid metabolism//Metabolism	-	GO:0016491//oxidoreductase activity;GO:0003824//catalytic activity;GO:0016645//oxidoreductase activity, acting on the CH-NH group of donors	GO:0044238//primary metabolic process;GO:0009987//cellular process;GO:0043648//dicarboxylic acid metabolic process;GO:0006560//proline metabolic process;GO:0071704//organic substance metabolic process;GO:1901605//alpha-amino acid metabolic process;GO:1901564//organonitrogen compound metabolic process;GO:0046483//heterocycle metabolic process;GO:0006807//nitrogen compound metabolic process;GO:0006…
Unigene0000339	6	5.66666666666667	0.5060	0.5487	0.3070	0.3678	0.4443	0.1577	0.4539	0.323266666666667	-0.489649735262718	0.604192952259905	1	no	-	--	-	-	-	-
Unigene0000340	17.3333333333333	12	1.2274	1.2223	1.4683	0.4370	0.7260	0.9291	1.306	0.697366666666667	-0.905165585190781	0.155534203378535	0.891264838203966	no	PCDHGB7	PREDICTED: protocadherin gamma-B7-like [Sinocyclocheilus anshuiensis]	-	GO:0016020//membrane	-	GO:0007155//cell adhesion;GO:0022610//biological adhesion
Unigene0000341	233.333333333333	798.666666666667	2.9086	5.3250	2.6955	15.3546	4.6311	7.1317	3.64303333333333	9.03913333333333	1.31104425890487	0.00767057934740621	0.355991293621193	no	-	PREDICTED: guanylate cyclase 2G-like [Sinocyclocheilus grahami]	-	-	-	-
Unigene0000342	16	30	1.0303	0.5586	1.8130	3.1026	0.7756	1.0704	1.13396666666667	1.64953333333333	0.540679699402006	0.449532859585727	1	no	-	--	-	-	-	-
Unigene0000343	484.333333333333	471.666666666667	17.2529	14.4209	19.9137	13.6111	14.3577	10.9870	17.1958333333333	12.9852666666667	-0.405183390868548	0.275677990504129	0.983839344944986	no	-	--	-	-	-	-
Unigene0000344	139.333333333333	66	4.4279	1.9572	1.2324	0.5763	1.3036	0.7729	2.53916666666667	0.884266666666667	-1.52180168296546	0.00743501801147309	0.355696411513827	no	-	PREDICTED: RNA-directed DNA polymerase from mobile element jockey-like [Danio rerio]	-	-	-	-
Unigene0000345	8.66666666666667	15	0.6109	0.5678	0.5560	0.6661	0.6898	0.9044	0.578233333333333	0.753433333333333	0.381828084243777	0.587154691530862	1	no	-	--	-	-	-	-
Unigene0000346	1882.66666666667	2974.66666666667	35.8462	34.6723	41.8470	32.9109	58.8767	46.9687	37.4551666666667	46.2521	0.304354128640459	0.375605494383462	1	no	eed	PREDICTED: polycomb protein EED [Cyprinus carpio]	-	GO:0043231//intracellular membrane-bounded organelle;GO:0005623//cell;GO:0043226//organelle;GO:0044464//cell part;GO:0043227//membrane-bounded organelle;GO:0005622//intracellular;GO:0043229//intracellular organelle;GO:0044424//intracellular part	-	GO:0044238//primary metabolic process;GO:0034645//cellular macromolecule biosynthetic process;GO:0016070//RNA metabolic process;GO:0032774//RNA biosynthetic process;GO:0044249//cellular biosynthetic process;GO:0009987//cellular process;GO:1901360//organic cyclic compound metabolic process;GO:0016043//cellular component organization;GO:0034654//nucleobase-containing compound biosynthetic process;G…
Unigene0000347	12.3333333333333	14.6666666666667	0.3181	1.3800	0.1158	1.0902	0.1197	0.2644	0.604633333333333	0.491433333333333	-0.299064799399011	0.762382719026444	1	no	-	--	-	-	-	-
Unigene0000348	492.666666666667	559.333333333333	2.5429	3.7170	2.5933	2.8409	2.6449	2.1179	2.95106666666667	2.53456666666667	-0.219497401020179	0.560008066413945	1	no	grid2	PREDICTED: glutamate receptor ionotropic, delta-2 isoform X1 [Danio rerio]	ko04080//Neuroactive ligand-receptor interaction//Signaling molecules and interaction//Environmental Information Processing	-	-	-
Unigene0000349	11.6666666666667	26.6666666666667	0.1443	0.1219	0.1337	0.2288	0.3653	0.1226	0.1333	0.2389	0.841730073367359	0.184524516517873	0.922367932473151	no	ADGRD2	PREDICTED: adhesion G-protein coupled receptor D2-like [Sinocyclocheilus anshuiensis]	-	-	-	-
Unigene0000350	23	39.3333333333333	0.1275	0.6319	1.5469	1.4560	0.8316	0.9800	0.768766666666667	1.0892	0.502651199440254	0.505090425834832	1	no	-	--	-	-	-	-
Unigene0000351	20	26.6666666666667	1.2616	0.8118	0.5653	1.3907	0.8036	0.3630	0.879566666666667	0.852433333333333	-0.0452059217677567	0.974063805930842	1	no	TRIM16	PREDICTED: tripartite motif-containing protein 16-like, partial [Sinocyclocheilus rhinocerous]	-	-	-	-
Unigene0000352	10.6666666666667	8	1.4853	0.5177	0.6760	0.2892	0.4193	0.7523	0.893	0.486933333333333	-0.874935910745521	0.260501715375965	0.975320740195388	no	-	--	-	-	-	-
Unigene0000353	6	14.3333333333333	0.5021	0.3734	0.6581	1.0637	1.3607	0.5008	0.5112	0.975066666666667	0.93161302501975	0.215858773792114	0.943418700872551	no	-	--	-	-	-	-
Unigene0000354	16.6666666666667	16.3333333333333	1.2136	1.8222	1.0876	0.8725	0.6325	1.4548	1.37446666666667	0.9866	-0.478334726833746	0.443516054593337	1	no	-	--	-	-	-	-
Unigene0000355	4	6	0.4005	0.0000	0.5832	0.3743	0.3768	0.4369	0.3279	0.396	0.272244528573911	0.830953182634778	1	no	-	--	-	-	-	-
Unigene0000356	10.6666666666667	15	0.4174	1.0863	0.7902	0.8322	1.0054	0.6765	0.764633333333333	0.838033333333333	0.132239535003784	0.904477514961689	1	no	-	PREDICTED: piggyBac transposable element-derived protein 4-like [Cyprinus carpio]	-	-	-	-
Unigene0000357	6	6.66666666666667	0.8262	0.3413	0.3342	0.6864	0.4146	0.1145	0.500566666666667	0.405166666666667	-0.305046735902824	0.788912503631802	1	no	-	--	-	-	-	-
Unigene0000358	16.6666666666667	15	1.2726	0.4929	0.6178	0.5616	0.5987	0.4297	0.794433333333333	0.53	-0.583933797966117	0.386517384097683	1	no	-	--	-	-	-	-
Unigene0000359	29.3333333333333	24.6666666666667	3.4229	1.6631	1.1896	1.1148	1.2298	1.4548	2.09186666666667	1.26646666666667	-0.723981792788164	0.231189672874072	0.953849076866028	no	-	--	-	-	-	-
Unigene0000360	451.333333333333	549.666666666667	34.8476	34.7235	46.4348	27.4689	38.3275	44.0094	38.6686333333333	36.6019333333333	-0.0792439216763173	0.836509220151544	1	no	NDUFB1	PREDICTED: NADH dehydrogenase [ubiquinone] 1 beta subcomplex subunit 1 [Ictalurus punctatus]	ko01100//Metabolic pathways//Global and Overview//Metabolism;ko00190//Oxidative phosphorylation//Energy metabolism//Metabolism	GO:0044464//cell part;GO:0005623//cell;GO:0005622//intracellular;GO:0044424//intracellular part;GO:0043229//intracellular organelle;GO:0043226//organelle;GO:0043231//intracellular membrane-bounded organelle;GO:0043227//membrane-bounded organelle	-	GO:0008152//metabolic process;GO:0044710//single-organism metabolic process;GO:0044699//single-organism process
Unigene0000361	123.666666666667	175.333333333333	2.5568	1.4625	2.3057	2.3528	1.7618	2.6360	2.10833333333333	2.2502	0.0939502562165149	0.833475831931738	1	no	ric3	PREDICTED: protein RIC-3-like isoform X2 [Sinocyclocheilus anshuiensis]	-	-	-	-
Unigene0000362	18.3333333333333	28.6666666666667	0.8322	0.6825	0.8198	1.1590	0.7370	0.8544	0.778166666666667	0.9168	0.236527861348509	0.697945504991362	1	no	-	--	-	-	-	-
Unigene0000363	14	23.3333333333333	0.7808	1.7740	0.6949	1.3513	1.1102	1.5143	1.08323333333333	1.32526666666667	0.290938644757465	0.662515445294924	1	no	-	hypothetical protein XENTR_v900217182mg, partial [Xenopus tropicalis]	-	-	-	-
Unigene0000364	17.6666666666667	17.3333333333333	0.8957	0.9886	0.7337	0.5232	0.4635	0.9073	0.872666666666667	0.631333333333333	-0.467028766476857	0.452223983836127	1	no	-	--	-	-	-	-
Unigene0000365	6.66666666666667	7.33333333333333	0.4005	0.2792	0.9478	0.6862	0.3768	0.3745	0.5425	0.479166666666667	-0.179095587333897	0.857575892221088	1	no	MYO7B	PREDICTED: unconventional myosin-VIIa isoform X1 [Danio rerio]	-	-	-	-
Unigene0000366	159	311	1.5486	1.6397	2.2651	1.9214	2.9093	3.5005	1.8178	2.77706666666667	0.611368332644047	0.154073985981967	0.889468170276521	no	SLC12A1	PREDICTED: solute carrier family 12 member 1 [Scleropages formosus]	-	GO:0043226//organelle;GO:0031988//membrane-bounded vesicle;GO:0043227//membrane-bounded organelle;GO:0031982//vesicle;GO:0016020//membrane	GO:0005215//transporter activity;GO:0015291//secondary active transmembrane transporter activity;GO:0015294//solute:cation symporter activity;GO:0022892//substrate-specific transporter activity;GO:0008324//cation transmembrane transporter activity;GO:0015103//inorganic anion transmembrane transporter activity;GO:0022891//substrate-specific transmembrane transporter activity;GO:0015377//cation:chl…	GO:0051179//localization;GO:0006811//ion transport;GO:0044699//single-organism process;GO:0044765//single-organism transport;GO:0044763//single-organism cellular process;GO:0006812//cation transport;GO:0051234//establishment of localization;GO:0006820//anion transport;GO:0006821//chloride transport;GO:0009987//cellular process;GO:0030001//metal ion transport;GO:0006810//transport;GO:0015698//inor…
Unigene0000367	12.3333333333333	10.3333333333333	1.1766	0.7291	1.2137	1.2218	0.4428	0.3056	1.0398	0.656733333333333	-0.662926472304114	0.366362936588523	1	no	-	novel immune-type receptor 1f, allele 2 [Danio rerio]	-	-	-	-
Unigene0000368	37	49.6666666666667	0.4633	0.4306	0.4267	0.5689	0.4616	0.3143	0.4402	0.448266666666667	0.0261980786234551	0.981992365987886	1	no	Cdca4	PREDICTED: cell division cycle-associated protein 4-like isoform X1 [Sinocyclocheilus grahami]	-	-	-	-
Unigene0000369	10.6666666666667	7.33333333333333	0.8620	1.6915	0.2790	0.8952	0.2163	0.2388	0.944166666666667	0.4501	-1.06879598548853	0.237954820835811	0.95890918956321	no	-	PREDICTED: cullin-9-like [Sinocyclocheilus rhinocerous]	-	-	-	-
Unigene0000370	4	3	0.1500	0.5575	0.1092	0.1401	0.0000	0.2804	0.272233333333333	0.140166666666667	-0.957700427223788	0.450587739515309	1	no	-	--	-	-	-	-
Unigene0000371	16.6666666666667	12.6666666666667	0.5669	0.5749	1.0133	0.2248	0.5820	0.5141	0.718366666666667	0.4403	-0.706233564058151	0.275885369559991	0.984040480583631	no	-	--	-	-	-	-
Unigene0000372	2939.66666666667	4455.33333333333	14.7721	14.4567	18.7185	17.6717	21.7807	17.2209	15.9824333333333	18.8911	0.241219634090638	0.447312766322025	1	no	PER2	PREDICTED: period circadian protein homolog 2-like isoform X1 [Pygocentrus nattereri]	-	-	-	-
Unigene0000373	7.33333333333333	14	0.3983	0.5183	0.5801	0.7942	0.3598	0.9932	0.4989	0.715733333333333	0.520671501470601	0.484051865950752	1	no	-	--	-	-	-	-
Unigene0000374	6877.66666666667	6726.33333333333	71.1174	68.5189	83.2801	74.2191	56.5796	36.9163	74.3054666666667	55.905	-0.41049103421645	0.227490428499291	0.951444695775288	no	DEK	PREDICTED: protein DEK-like [Sinocyclocheilus grahami]	-	-	GO:0005488//binding;GO:0003676//nucleic acid binding;GO:0097159//organic cyclic compound binding;GO:1901363//heterocyclic compound binding	-
Unigene0000375	23.3333333333333	21.3333333333333	1.2695	1.1179	1.6055	0.8742	0.9556	0.9996	1.33096666666667	0.943133333333333	-0.496940792026063	0.374748308515438	1	no	-	--	-	-	-	-
Unigene0000376	8.66666666666667	6.66666666666667	0.1938	0.8106	1.0584	0.3623	0.5106	0.4228	0.6876	0.4319	-0.670872228271039	0.405141413611629	1	no	-	--	-	-	-	-
Unigene0000377	15	27.6666666666667	0.7483	0.3478	0.9341	0.8992	0.8047	1.1995	0.676733333333333	0.9678	0.516121487196987	0.417479406717934	1	no	-	PREDICTED: neuron navigator 3-like [Poecilia mexicana]	-	-	-	-
Unigene0000378	140.666666666667	225.666666666667	1.6922	1.3550	1.7061	2.4331	1.5873	1.7446	1.58443333333333	1.92166666666667	0.278391149040542	0.515595964939061	1	no	nrarpb	PREDICTED: notch-regulated ankyrin repeat-containing protein B isoform X1 [Danio rerio]	-	-	-	-
Unigene0000379	16	7.66666666666667	0.9790	0.7280	0.4277	0.1220	0.2948	0.3357	0.711566666666667	0.250833333333333	-1.50426984800215	0.0377093874809513	0.604287386793657	no	-	--	-	-	-	-
Unigene0000380	148	140.666666666667	2.0499	3.1332	3.4166	1.3766	1.4059	3.4502	2.86656666666667	2.07756666666667	-0.46442905952201	0.350355542010436	1	no	Rasd1	dexamethasone-induced Ras-related protein 1 [Danio rerio]	-	-	GO:0036094//small molecule binding;GO:0005488//binding	GO:0019693//ribose phosphate metabolic process;GO:0035556//intracellular signal transduction;GO:0006793//phosphorus metabolic process;GO:0009987//cellular process;GO:0006163//purine nucleotide metabolic process;GO:0071704//organic substance metabolic process;GO:0009117//nucleotide metabolic process;GO:0051716//cellular response to stimulus;GO:0046483//heterocycle metabolic process;GO:0034641//cel…
Unigene0000381	8575.33333333333	5637.66666666667	625.0915	385.9202	466.9700	143.3998	176.3995	399.6058	492.660566666667	239.8017	-1.03875211434268	0.0109256699479662	0.403894120283972	no	DYNLRB2	PREDICTED: dynein light chain roadblock-type 2 [Astyanax mexicanus]	-	-	-	-
Unigene0000382	14.6666666666667	12.3333333333333	1.6471	0.3062	0.6717	0.3695	0.5456	0.6982	0.875	0.537766666666667	-0.70230268405676	0.356077843530956	1	no	-	--	-	-	-	-
Unigene0000383	7.66666666666667	13.3333333333333	0.5083	0.1890	1.1844	0.8234	0.3061	1.4575	0.627233333333333	0.862333333333333	0.459243416929546	0.631119779489261	1	no	-	--	-	-	-	-
Unigene0000384	266	295.333333333333	3.4499	3.3767	2.4360	3.4360	2.0953	2.0447	3.08753333333333	2.52533333333333	-0.289980882183058	0.486270201583341	1	no	eif3a	PREDICTED: protein LIAT1 [Pseudopodoces humilis]	-	-	-	-
Unigene0000385	74	221.333333333333	0.5903	2.2338	1.2281	5.0177	2.2852	1.8136	1.35073333333333	3.03883333333333	1.16977467084581	0.0411688186378605	0.619091123724896	no	foxa2	PREDICTED: hepatocyte nuclear factor 3-beta [Sinocyclocheilus rhinocerous]	-	-	-	-
Unigene0000386	1825.33333333333	1523	9.3444	5.9809	6.9558	4.7702	3.6146	5.4098	7.42703333333333	4.5982	-0.691716835450393	0.0497646050113056	0.656166901852624	no	IGSF3	PREDICTED: immunoglobulin superfamily member 3-like [Sinocyclocheilus rhinocerous]	-	-	-	-
Unigene0000387	14.3333333333333	25.3333333333333	0.6977	0.5404	0.8891	0.7970	1.4881	0.7249	0.709066666666667	1.00333333333333	0.500807804676754	0.422267867157801	1	no	pol	Pro-Pol polyprotein [Larimichthys crocea]	-	-	-	-
Unigene0000388	158	304	1.2996	2.1763	0.9088	3.3997	1.5451	1.1831	1.46156666666667	2.04263333333333	0.482914617158875	0.34350115663178	1	no	Rasa4	PREDICTED: ras GTPase-activating protein 4-like isoform X1 [Sinocyclocheilus anshuiensis]	-	-	-	-
Unigene0000389	8.33333333333333	6.66666666666667	0.7986	1.0206	0.4361	0.4354	0.4508	0.4356	0.751766666666667	0.4406	-0.770815452663454	0.326263594926734	0.999845213278851	no	FRRS1	si:dkey-251i10.2 precursor [Danio rerio]	-	-	-	-
Unigene0000390	3.66666666666667	9	0.0696	0.0647	0.4563	0.6941	0.4717	0.0868	0.196866666666667	0.417533333333333	1.08467252247081	0.306355447105657	0.996645002446925	no	-	PREDICTED: contactin-3-like [Sinocyclocheilus anshuiensis]	-	-	-	-
Unigene0000391	1299.33333333333	1543	24.1185	18.7541	19.0629	11.5465	16.4271	27.0153	20.6451666666667	18.3296333333333	-0.171626138873699	0.657872632568968	1	no	cyhr1	PREDICTED: cysteine and histidine-rich protein 1 [Sinocyclocheilus rhinocerous]	-	GO:0005623//cell;GO:0005622//intracellular;GO:0044424//intracellular part;GO:0044464//cell part	GO:0046872//metal ion binding;GO:0005488//binding;GO:0043169//cation binding;GO:0043167//ion binding;GO:0046914//transition metal ion binding	GO:0070647//protein modification by small protein conjugation or removal;GO:0043412//macromolecule modification;GO:0008152//metabolic process;GO:0044260//cellular macromolecule metabolic process;GO:0009987//cellular process;GO:0019538//protein metabolic process;GO:0043170//macromolecule metabolic process;GO:0071704//organic substance metabolic process;GO:0044237//cellular metabolic process;GO:004…
Unigene0000392	503.333333333333	369.333333333333	8.0576	11.8596	5.6877	3.5320	3.8105	6.4056	8.53496666666667	4.5827	-0.897187674010144	0.0358971348649931	0.594088066110032	no	fsta	PREDICTED: follistatin-A-like [Sinocyclocheilus rhinocerous]	ko04350//TGF-beta signaling pathway//Signal transduction//Environmental Information Processing	-	-	-
Unigene0000393	231.333333333333	413.666666666667	2.5396	2.0006	2.3385	2.5048	3.3005	3.5709	2.2929	3.1254	0.446867406734644	0.254916013188763	0.970334802211408	no	Pacs1	PREDICTED: phosphofurin acidic cluster sorting protein 2-like isoform X2 [Sinocyclocheilus anshuiensis]	-	-	-	-
Unigene0000394	4	6	0.2793	0.0865	0.5423	0.5800	0.0000	0.4642	0.3027	0.348066666666667	0.20147498279926	0.922701006489838	1	no	-	--	-	-	-	-
Unigene0000395	16.3333333333333	13.6666666666667	0.5542	0.6181	1.0895	0.3453	0.7926	0.4146	0.753933333333333	0.5175	-0.542878095999194	0.38950612615116	1	no	-	--	-	-	-	-
Unigene0000396	862	1289.33333333333	5.6165	6.6852	7.9260	8.6659	8.6283	6.2770	6.74256666666667	7.85706666666667	0.220692920549209	0.534671095271981	1	no	MAPT	PREDICTED: microtubule-associated protein tau-like isoform X3 [Sinocyclocheilus anshuiensis]	ko04010//MAPK signaling pathway//Signal transduction//Environmental Information Processing	-	-	-
Unigene0000397	26.6666666666667	32.3333333333333	1.8576	2.0029	1.4068	0.8796	1.5102	2.3623	1.75576666666667	1.58403333333333	-0.148498435218937	0.816595464851622	1	no	-	--	-	-	-	-
Unigene0000398	13	10	1.2242	1.4629	0.4457	0.8717	0.0658	0.7086	1.04426666666667	0.5487	-0.928400688412671	0.284824251390685	0.9871540011502	no	-	--	-	-	-	-
Unigene0000399	7.33333333333333	12	0.5034	0.4679	0.6109	1.2546	0.4421	0.2615	0.5274	0.652733333333333	0.307596144530859	0.733835391192876	1	no	-	--	-	-	-	-
Unigene0000400	1134	962	19.1828	11.1256	12.4896	9.7669	7.3857	9.6567	14.266	8.93643333333333	-0.674809828844243	0.0675360116490495	0.719290199272584	no	TMEM104	PREDICTED: transmembrane protein 104-like [Sinocyclocheilus grahami]	-	GO:0044425//membrane part;GO:0016020//membrane;GO:0031224//intrinsic component of membrane	-	-
Unigene0000401	24.3333333333333	40.3333333333333	1.1255	1.2205	1.5481	1.4805	1.7886	1.7540	1.29803333333333	1.67436666666667	0.36728806374271	0.505178988501361	1	no	-	--	-	-	-	-
Unigene0000402	14.3333333333333	23.3333333333333	0.8843	0.3216	0.3079	0.5030	0.2605	0.9586	0.5046	0.574033333333333	0.18599430835402	0.789358646494317	1	no	-	--	-	-	-	-
Unigene0000403	1319.66666666667	1717	10.8742	11.9834	13.1584	10.9432	13.7781	11.5744	12.0053333333333	12.0985666666667	0.01116067843382	0.97442039768814	1	no	Fnta	protein farnesyltransferase/geranylgeranyltransferase type-1 subunit alpha [Danio rerio]	ko01130//Biosynthesis of antibiotics//Global and Overview//Metabolism;ko00900//Terpenoid backbone biosynthesis//Metabolism of terpenoids and polyketides//Metabolism	-	GO:0003824//catalytic activity;GO:0016740//transferase activity;GO:0016765//transferase activity, transferring alkyl or aryl (other than methyl) groups;GO:0004659//prenyltransferase activity	-
Unigene0000404	79.3333333333333	82	1.4922	1.7448	1.7174	1.6795	1.1595	1.0502	1.65146666666667	1.2964	-0.349236924678533	0.457280260246408	1	no	-	--	-	-	-	-
Unigene0000405	3043.66666666667	2778	40.7436	29.8846	34.5325	15.0328	19.0052	37.6786	35.0535666666667	23.9055333333333	-0.552216651911726	0.153128256519943	0.889358414000717	no	b3gnt5a	PREDICTED: lactosylceramide 1,3-N-acetyl-beta-D-glucosaminyltransferase [Cyprinus carpio]	ko01100//Metabolic pathways//Global and Overview//Metabolism;ko00601//Glycosphingolipid biosynthesis - lacto and neolacto series//Glycan biosynthesis and metabolism//Metabolism	GO:0044424//intracellular part;GO:0043227//membrane-bounded organelle;GO:0044425//membrane part;GO:0005623//cell;GO:0044446//intracellular organelle part;GO:0005737//cytoplasm;GO:0016020//membrane;GO:0043226//organelle;GO:0012505//endomembrane system;GO:0044444//cytoplasmic part;GO:0043231//intracellular membrane-bounded organelle;GO:0044422//organelle part;GO:0005794//Golgi apparatus;GO:0044464/…	GO:0003824//catalytic activity;GO:0008194//UDP-glycosyltransferase activity;GO:0016758//transferase activity, transferring hexosyl groups;GO:0008375//acetylglucosaminyltransferase activity;GO:0016740//transferase activity;GO:0016757//transferase activity, transferring glycosyl groups	GO:0044237//cellular metabolic process;GO:0009987//cellular process;GO:0006464//cellular protein modification process;GO:0043170//macromolecule metabolic process;GO:0019538//protein metabolic process;GO:0071704//organic substance metabolic process;GO:0044238//primary metabolic process;GO:0043412//macromolecule modification;GO:0008152//metabolic process;GO:0036211//protein modification process;GO:…
Unigene0000406	1201	1444	13.6288	9.1494	13.6529	8.8640	12.0677	12.7839	12.1437	11.2385333333333	-0.111754284472506	0.754264020451205	1	no	e4f1	PREDICTED: transcription factor E4F1 isoform X2 [Sinocyclocheilus rhinocerous]	-	GO:0005634//nucleus;GO:0070013//intracellular organelle lumen;GO:0043226//organelle;GO:0043227//membrane-bounded organelle;GO:0005622//intracellular;GO:0043229//intracellular organelle;GO:0044464//cell part;GO:0044422//organelle part;GO:0044424//intracellular part;GO:0031974//membrane-enclosed lumen;GO:0043233//organelle lumen;GO:0031981//nuclear lumen;GO:0005623//cell;GO:0044428//nuclear part;GO…	GO:0003824//catalytic activity;GO:1901363//heterocyclic compound binding;GO:0097159//organic cyclic compound binding;GO:0005488//binding;GO:0003676//nucleic acid binding	GO:0044238//primary metabolic process;GO:0018130//heterocycle biosynthetic process;GO:0034654//nucleobase-containing compound biosynthetic process;GO:0044267//cellular protein metabolic process;GO:0032446//protein modification by small protein conjugation;GO:0044237//cellular metabolic process;GO:0043412//macromolecule modification;GO:0044271//cellular nitrogen compound biosynthetic process;GO:00…
Unigene0000407	9.33333333333333	9.33333333333333	0.5165	0.4800	1.0029	0.3218	0.7128	0.5902	0.666466666666667	0.5416	-0.299304981806766	0.71185059104183	1	no	-	--	-	-	-	-
Unigene0000408	7	4.33333333333333	0.4668	0.3471	0.8157	0.0582	0.6325	0.1746	0.5432	0.288433333333333	-0.913245577639855	0.356452789957258	1	no	-	--	-	-	-	-
Unigene0000409	621	848.666666666667	4.1217	4.6591	6.6299	5.8743	6.6697	4.1378	5.1369	5.5606	0.114342572041296	0.766083441180558	1	no	DACH2	PREDICTED: dachshund homolog 2-like isoform X1 [Cyprinus carpio]	-	GO:0043229//intracellular organelle;GO:0044464//cell part;GO:0043227//membrane-bounded organelle;GO:0044424//intracellular part;GO:0005622//intracellular;GO:0005623//cell;GO:0043231//intracellular membrane-bounded organelle;GO:0043226//organelle	-	GO:0044707//single-multicellular organism process;GO:0044767//single-organism developmental process;GO:0007275//multicellular organism development;GO:0048856//anatomical structure development;GO:0048731//system development;GO:0032501//multicellular organismal process;GO:0044699//single-organism process;GO:0031016//pancreas development;GO:0048513//animal organ development;GO:0032502//developmental…
Unigene0000410	38.6666666666667	38.6666666666667	2.4631	1.8732	1.4675	1.0813	1.2642	1.9193	1.9346	1.4216	-0.444519717528243	0.419773710888467	1	no	-	--	-	-	-	-
Unigene0000411	10.6666666666667	14.3333333333333	0.3626	0.8762	0.7393	0.5874	0.6005	0.8589	0.659366666666667	0.682266666666667	0.0492547771475124	0.999999999999984	1	no	-	--	-	-	-	-
Unigene0000412	3007	4415.33333333333	27.5622	30.0281	33.5463	26.5827	40.5939	36.7567	30.3788666666667	34.6444333333333	0.189555510037223	0.557418843494165	1	no	ankrd13c	PREDICTED: ankyrin repeat domain-containing protein 13C [Sinocyclocheilus anshuiensis]	-	GO:0043226//organelle;GO:0043231//intracellular membrane-bounded organelle;GO:0043229//intracellular organelle;GO:0044424//intracellular part;GO:0044464//cell part;GO:0042175//nuclear outer membrane-endoplasmic reticulum membrane network;GO:0016020//membrane;GO:0005622//intracellular;GO:0005623//cell;GO:0043227//membrane-bounded organelle;GO:0012505//endomembrane system	-	-
Unigene0000413	27	45.3333333333333	0.9376	0.5304	1.3060	0.8381	1.5649	1.3213	0.924666666666667	1.24143333333333	0.425001501959137	0.469240811148198	1	no	FRAS1	PREDICTED: extracellular matrix protein FRAS1-like [Sinocyclocheilus rhinocerous]	-	-	-	GO:0009790//embryo development;GO:0048598//embryonic morphogenesis;GO:0009987//cellular process;GO:0043062//extracellular structure organization;GO:0048736//appendage development;GO:0032501//multicellular organismal process;GO:0044707//single-multicellular organism process;GO:0016043//cellular component organization;GO:0030198//extracellular matrix organization;GO:0033333//fin development;GO:0009…
Unigene0000414	31.3333333333333	26.6666666666667	1.6968	2.2178	0.6564	1.6188	0.6786	0.4628	1.52366666666667	0.920066666666667	-0.727737012607212	0.281281481421313	0.985503129305313	no	-	--	-	-	-	-
Unigene0000415	15.3333333333333	19.6666666666667	0.7798	0.6644	1.0883	0.6073	0.2935	1.5393	0.844166666666667	0.813366666666667	-0.0536219956038963	0.966537824909973	1	no	-	PREDICTED: protocadherin Fat 2-like [Sinocyclocheilus grahami]	-	-	-	-
Unigene0000416	67.6666666666667	59	1.3536	1.6639	0.9379	1.2514	0.8381	0.4627	1.31846666666667	0.850733333333333	-0.632082209775592	0.236353652294384	0.957878416370176	no	-	--	-	-	-	-
Unigene0000417	8	9	0.2680	0.7472	0.7805	0.5566	0.4035	0.6125	0.598566666666667	0.5242	-0.191394585754885	0.869168151123302	1	no	-	--	-	-	-	-
Unigene0000418	17	27.3333333333333	0.5379	0.8460	0.4820	0.9796	0.3114	0.8769	0.621966666666667	0.722633333333333	0.216426540911671	0.74156178352463	1	no	Gtf2ird2	general transcription factor II-I repeat domain-containing protein 2B-like [Alligator mississippiensis]	-	-	-	-
Unigene0000419	25.3333333333333	27.3333333333333	1.1160	0.8118	1.2366	0.6651	0.8036	1.1494	1.0548	0.8727	-0.273411774043097	0.657431913854979	1	no	-	--	-	-	-	-
Unigene0000420	1069.33333333333	1345	11.9491	14.2478	15.0713	15.6635	12.6423	11.4760	13.7560666666667	13.2606	-0.0529219585022597	0.878359535902245	1	no	ZDHHC6	PREDICTED: palmitoyltransferase ZDHHC6 [Sinocyclocheilus grahami]	-	GO:0016020//membrane;GO:0031224//intrinsic component of membrane;GO:0044425//membrane part	GO:0016740//transferase activity;GO:0046914//transition metal ion binding;GO:0005488//binding;GO:0003824//catalytic activity;GO:0016746//transferase activity, transferring acyl groups;GO:0043169//cation binding;GO:0016409//palmitoyltransferase activity;GO:0016747//transferase activity, transferring acyl groups other than amino-acyl groups;GO:0046872//metal ion binding;GO:0043167//ion binding	-
Unigene0000421	6.33333333333333	17.6666666666667	0.6067	0.3524	0.3313	0.8033	1.1988	0.7091	0.430133333333333	0.903733333333333	1.07111319832835	0.111310467311463	0.823808040826175	no	-	--	-	-	-	-
Unigene0000422	633.333333333333	903.333333333333	10.1515	13.6245	13.4248	14.9334	13.9641	11.9469	12.4002666666667	13.6148	0.134804643518488	0.706571574504828	1	no	BMS1	ribosome biogenesis protein BMS1 homolog [Danio rerio]	ko03008//Ribosome biogenesis in eukaryotes//Translation//Genetic Information Processing	GO:0044424//intracellular part;GO:0005622//intracellular;GO:0043227//membrane-bounded organelle;GO:0043226//organelle;GO:0005623//cell;GO:0044464//cell part;GO:0043231//intracellular membrane-bounded organelle;GO:0043229//intracellular organelle	GO:0001883//purine nucleoside binding;GO:0003824//catalytic activity;GO:0005488//binding;GO:1901363//heterocyclic compound binding;GO:0032550//purine ribonucleoside binding;GO:0016818//hydrolase activity, acting on acid anhydrides, in phosphorus-containing anhydrides;GO:0032549//ribonucleoside binding;GO:0016462//pyrophosphatase activity;GO:0097159//organic cyclic compound binding;GO:0036094//sma…	GO:0044085//cellular component biogenesis;GO:0022613//ribonucleoprotein complex biogenesis;GO:0044767//single-organism developmental process;GO:0071840//cellular component organization or biogenesis;GO:0044699//single-organism process;GO:0042254//ribosome biogenesis;GO:0032502//developmental process
Unigene0000423	11.6666666666667	8	1.4944	0.8171	0.5121	0.4382	0.5955	0.3836	0.9412	0.472433333333333	-0.994390560445841	0.191932428881222	0.927781952289244	no	-	--	-	-	-	-
Unigene0000424	1209.66666666667	1323	7.3882	6.8876	8.6119	5.9381	6.3403	6.9609	7.62923333333333	6.4131	-0.250516183557403	0.457338867345164	1	no	FBXO30	PREDICTED: F-box only protein 30-like [Sinocyclocheilus rhinocerous]	-	-	GO:0043169//cation binding;GO:0016740//transferase activity;GO:0043167//ion binding;GO:0005488//binding;GO:0003824//catalytic activity;GO:0046914//transition metal ion binding;GO:0046872//metal ion binding;GO:0019787//ubiquitin-like protein transferase activity	GO:0070647//protein modification by small protein conjugation or removal;GO:0044260//cellular macromolecule metabolic process;GO:0043412//macromolecule modification;GO:0044237//cellular metabolic process;GO:0044238//primary metabolic process;GO:0044267//cellular protein metabolic process;GO:0019538//protein metabolic process;GO:0009987//cellular process;GO:0043170//macromolecule metabolic process…
Unigene0000425	9.33333333333333	18.3333333333333	0.5099	0.5529	0.9281	0.0529	1.8550	1.3243	0.663633333333333	1.0774	0.699095712597918	0.453623409086994	1	no	VWA1	PREDICTED: von Willebrand factor A domain-containing protein 1 [Ictalurus punctatus]	-	-	-	-
Unigene0000426	804.333333333333	1264.66666666667	5.2276	6.0572	6.9636	6.8609	7.9367	7.4477	6.0828	7.4151	0.285730579227728	0.40778182481455	1	no	Wdr6	PREDICTED: WD repeat-containing protein 6-like [Sinocyclocheilus rhinocerous]	-	-	-	-
Unigene0000427	0	0	0.0000	0.0000	0.0000	0.0000	0.0000	0.0000	0.001	0.001	0	notest	notest	notest	-	--	-	-	-	-
Unigene0000428	107.666666666667	60	2.8295	2.7508	3.4338	1.8237	1.9830	0.1825	3.0047	1.32973333333333	-1.17608399973121	0.0751392718209662	0.743292772206912	no	-	--	-	-	-	-
Unigene0000429	123.333333333333	212.333333333333	3.0597	10.2308	0.4630	13.6667	1.2264	1.0899	4.5845	5.32766666666667	0.216739423349059	0.822035601131295	1	no	-	PREDICTED: sorting nexin-10A-like [Cyprinus carpio]	-	-	-	-
Unigene0000430	2267	3169	19.6241	21.2439	19.3955	22.6115	20.7929	20.3863	20.0878333333333	21.2635666666667	0.0820616452523785	0.793874832676092	1	no	PISD	PREDICTED: phosphatidylserine decarboxylase proenzyme, mitochondrial isoform X4 [Sinocyclocheilus grahami]	ko01100//Metabolic pathways//Global and Overview//Metabolism;ko01110//Biosynthesis of secondary metabolites//Global and Overview//Metabolism;ko00564//Glycerophospholipid metabolism//Lipid metabolism//Metabolism	-	GO:0016829//lyase activity;GO:0016831//carboxy-lyase activity;GO:0003824//catalytic activity;GO:0016830//carbon-carbon lyase activity	GO:0008152//metabolic process;GO:0044710//single-organism metabolic process;GO:0044699//single-organism process;GO:0044763//single-organism cellular process;GO:0006793//phosphorus metabolic process;GO:0044255//cellular lipid metabolic process;GO:0019637//organophosphate metabolic process;GO:0006629//lipid metabolic process;GO:0006796//phosphate-containing compound metabolic process;GO:0044237//ce…
Unigene0000431	1560.33333333333	2273.33333333333	23.0131	40.0190	17.6421	50.7561	17.6429	16.6184	26.8914	28.3391333333333	0.0756507727882798	0.87243584271149	1	no	Tpm4	PREDICTED: tropomyosin alpha-4 chain isoform X3 [Sinocyclocheilus grahami]	ko04261//Adrenergic signaling in cardiomyocytes//Circulatory system//Organismal Systems;ko04260//Cardiac muscle contraction//Circulatory system//Organismal Systems	-	-	GO:0044699//single-organism process;GO:0030036//actin cytoskeleton organization;GO:0032501//multicellular organismal process;GO:0007010//cytoskeleton organization;GO:0006996//organelle organization;GO:1902589//single-organism organelle organization;GO:0048468//cell development;GO:0070925//organelle assembly;GO:0022607//cellular component assembly;GO:0055001//muscle cell development;GO:0044085//ce…
Unigene0000432	11409	19761.6666666667	88.0369	113.3319	115.5362	101.4512	178.7791	148.4850	105.635	142.9051	0.435969482838939	0.185290300204031	0.922933893374582	no	mcm4	PREDICTED: DNA replication licensing factor mcm4 [Sinocyclocheilus rhinocerous]	ko04110//Cell cycle//Cell growth and death//Cellular Processes;ko03030//DNA replication//Replication and repair//Genetic Information Processing	GO:0032991//macromolecular complex;GO:0043234//protein complex	GO:0016787//hydrolase activity;GO:0032549//ribonucleoside binding;GO:0005488//binding;GO:0001882//nucleoside binding;GO:1901363//heterocyclic compound binding;GO:0032550//purine ribonucleoside binding;GO:0097159//organic cyclic compound binding;GO:0001883//purine nucleoside binding;GO:0016818//hydrolase activity, acting on acid anhydrides, in phosphorus-containing anhydrides;GO:0003676//nucleic a…	GO:0051704//multi-organism process;GO:0050896//response to stimulus;GO:0006996//organelle organization;GO:0009607//response to biotic stimulus;GO:0051707//response to other organism;GO:0032392//DNA geometric change;GO:0016043//cellular component organization;GO:0009620//response to fungus;GO:0051276//chromosome organization;GO:0009987//cellular process;GO:0043207//response to external biotic stim…
Unigene0000433	8	16.3333333333333	0.2694	1.0017	0.5886	0.7834	0.2704	1.7356	0.6199	0.9298	0.584884921873457	0.481100759708751	1	no	-	PREDICTED: trichohyalin-like isoform X1 [Sinocyclocheilus grahami]	-	-	-	-
Unigene0000434	477	836	4.0156	4.6655	5.7276	5.1070	8.0193	6.7145	4.8029	6.6136	0.461530021016011	0.216657617644043	0.944415662156408	no	ATXN7L2	PREDICTED: ataxin-7-like protein 2 [Sinocyclocheilus anshuiensis]	-	-	-	-
Unigene0000435	0	0.333333333333333	0.0000	0.0000	0.0000	0.0000	0.0651	0.0000	0.001	0.0217	4.43962313755712	1	1	no	-	--	-	-	-	-
Unigene0000436	22	18	2.1972	1.6167	1.5332	0.9126	1.3094	1.0843	1.78236666666667	1.1021	-0.69353902312036	0.232724620649888	0.955128381057389	no	-	--	-	-	-	-
Unigene0000437	84.3333333333333	65.6666666666667	4.7435	4.7664	4.6209	3.1552	2.8469	2.3576	4.71026666666667	2.78656666666667	-0.757320069470832	0.0977940349223784	0.794930641996266	no	-	--	-	-	-	-
Unigene0000438	24.3333333333333	50.6666666666667	0.7214	0.8677	1.0505	1.3484	0.7666	2.0368	0.879866666666667	1.38393333333333	0.653417625176729	0.248014821711969	0.964581402735933	no	Slc12a5	PREDICTED: solute carrier family 12 member 5-like [Sinocyclocheilus rhinocerous]	-	-	-	-
Unigene0000439	277.333333333333	321.333333333333	16.0449	26.1871	25.6614	22.9693	19.9863	17.8606	22.6311333333333	20.2720666666667	-0.158815660382936	0.696417449778526	1	no	-	--	-	-	-	-
Unigene0000440	274.333333333333	321.666666666667	3.6517	2.5304	3.2023	2.4873	2.8573	3.0189	3.12813333333333	2.78783333333333	-0.166157692981898	0.674011039087124	1	no	-	PREDICTED: uncharacterized protein LOC107572457 [Sinocyclocheilus grahami]	-	-	-	-
Unigene0000441	1530.33333333333	2139.66666666667	11.6277	12.5018	15.2198	11.1574	16.2317	15.4706	13.1164333333333	14.2865666666667	0.123283780489137	0.717418336743926	1	no	GABPA	PREDICTED: GA-binding protein alpha chain-like isoform X1 [Sinocyclocheilus grahami]	-	-	-	-
Unigene0000442	93.6666666666667	74.3333333333333	2.8676	2.3019	2.7762	1.2994	1.7171	1.8079	2.64856666666667	1.60813333333333	-0.719824794936712	0.116722979449289	0.834549208107765	no	-	PREDICTED: zinc finger MYM-type protein 4-like [Cyprinus carpio]	-	-	-	-
Unigene0000443	16.3333333333333	13.6666666666667	0.7383	1.1437	1.4933	1.0222	0.3087	0.8182	1.1251	0.716366666666667	-0.651283121499956	0.335578125052719	1	no	-	--	-	-	-	-
Unigene0000444	201.666666666667	283.333333333333	1.9610	2.5760	2.3132	4.0564	1.9091	1.2876	2.2834	2.4177	0.0824516298402603	0.867120237122806	1	no	-	--	-	-	-	-
Unigene0000445	17.6666666666667	18.3333333333333	0.9022	0.2795	1.4453	0.4872	0.6791	1.0123	0.875666666666667	0.7262	-0.270014864499632	0.712668866559601	1	no	-	--	-	-	-	-
Unigene0000446	18.6666666666667	33.6666666666667	1.0905	1.0699	0.8382	2.1894	1.1858	0.6420	0.999533333333333	1.33906666666667	0.421901203179016	0.502666933029711	1	no	-	--	-	-	-	-
Unigene0000447	160	247	1.4818	0.9823	2.1664	1.4815	2.2223	1.9835	1.5435	1.89576666666667	0.296575923499185	0.512235670263576	1	no	LOXL3	PREDICTED: lysyl oxidase homolog 3-like isoform X1 [Sinocyclocheilus rhinocerous]	-	-	GO:0046914//transition metal ion binding;GO:0043169//cation binding;GO:0038024//cargo receptor activity;GO:0046872//metal ion binding;GO:0005488//binding;GO:0060089//molecular transducer activity;GO:0043167//ion binding;GO:0004872//receptor activity	GO:0044699//single-organism process;GO:0008152//metabolic process;GO:0044710//single-organism metabolic process
Unigene0000448	11	15.3333333333333	0.5338	0.1240	0.5830	0.2494	0.8037	0.3605	0.4136	0.4712	0.188103353515526	0.880715806028911	1	no	-	--	-	-	-	-
Unigene0000449	19.6666666666667	30	0.7804	0.8704	0.9850	1.3939	1.0574	0.6486	0.8786	1.0333	0.233980770934701	0.720619408556437	1	no	-	--	-	-	-	-
Unigene0000450	18	11.6666666666667	2.4925	1.2870	0.8066	0.6327	0.2085	1.2084	1.5287	0.6832	-1.16192543246301	0.132656066194405	0.862395120774538	no	-	--	-	-	-	-
Unigene0000451	710.333333333333	945.666666666667	56.6802	55.5143	58.4802	54.3535	52.6038	65.3138	56.8915666666667	57.4237	0.0134314810017778	0.970451600398993	1	no	MP68	PREDICTED: 6.8 kDa mitochondrial proteolipid [Sinocyclocheilus anshuiensis]	-	GO:0044464//cell part;GO:0005623//cell;GO:0044424//intracellular part;GO:0043227//membrane-bounded organelle;GO:0005622//intracellular;GO:0043231//intracellular membrane-bounded organelle;GO:0043229//intracellular organelle;GO:0043226//organelle	-	-
Unigene0000452	16.3333333333333	20.3333333333333	1.3363	1.6561	0.9082	2.3868	0.6706	0.4443	1.3002	1.16723333333333	-0.155640570461691	0.880785941150742	1	no	-	--	-	-	-	-
Unigene0000453	50	46.6666666666667	2.7034	2.4261	1.2218	0.7260	1.1930	2.3535	2.1171	1.42416666666667	-0.571971424644594	0.332359688113836	1	no	-	--	-	-	-	-
Unigene0000454	250	315.666666666667	16.8880	17.4692	23.6026	11.9932	23.7850	21.9039	19.3199333333333	19.2273666666667	-0.00692892771500981	0.986967525678525	1	no	-	--	-	-	-	-
Unigene0000455	261.333333333333	293	1.6760	1.4231	2.8367	1.3209	1.7050	2.2308	1.9786	1.75223333333333	-0.175285080199164	0.687009951451303	1	no	RNF157	PREDICTED: RING finger protein 157-like isoform X1 [Sinocyclocheilus anshuiensis]	-	-	GO:0043169//cation binding;GO:0043167//ion binding;GO:0005488//binding	-
Unigene0000456	28.6666666666667	11	2.0272	2.5396	2.0537	0.6590	0.9289	0.3846	2.20683333333333	0.6575	-1.74691487756122	0.00392088309704988	0.269059751698474	no	-	--	-	-	-	-
Unigene0000457	29	21.3333333333333	1.9785	1.5172	0.5042	0.3698	0.5957	1.1100	1.3333	0.691833333333333	-0.946505000231608	0.165209241981425	0.901161609781297	no	-	--	-	-	-	-
Unigene0000458	5.33333333333333	20	0.0000	0.3500	0.6033	1.0324	1.1906	0.7982	0.317766666666667	1.00706666666667	1.66411949047812	0.0442032644455266	0.632902139134368	no	-	--	-	-	-	-
Unigene0000459	1067.66666666667	1457.66666666667	9.7098	9.3949	10.6485	9.5404	11.7368	10.0478	9.91773333333333	10.4416666666667	0.0742696688287575	0.825926893476449	1	no	cdc37l1	PREDICTED: hsp90 co-chaperone Cdc37-like 1 isoform X3 [Sinocyclocheilus anshuiensis]	-	GO:0044464//cell part;GO:0005623//cell;GO:0005622//intracellular;GO:0044424//intracellular part	-	-
Unigene0000460	46.6666666666667	74.6666666666667	3.8134	4.7260	2.7768	6.4492	2.5972	4.0751	3.77206666666667	4.37383333333333	0.213543072853082	0.682630424600229	1	no	-	--	-	-	-	-
Unigene0000461	2.66666666666667	5.33333333333333	0.4342	0.2690	0.3161	0.7213	0.7626	0.0902	0.339766666666667	0.5247	0.626948468340232	0.599762451923319	1	no	-	--	-	-	-	-
Unigene0000462	14.6666666666667	12.6666666666667	1.4770	1.1154	1.0083	1.3804	0.4864	0.4028	1.20023333333333	0.756533333333333	-0.66583934759613	0.347278207263659	1	no	-	--	-	-	-	-
Unigene0000463	18.6666666666667	44	0.5260	1.1735	0.8427	1.2455	2.3759	1.1149	0.8474	1.57876666666667	0.897682930469446	0.133660986164146	0.863932715671275	no	gata3	PREDICTED: trans-acting T-cell-specific transcription factor GATA-3 isoform X5 [Sinocyclocheilus grahami]	-	-	-	-
Unigene0000464	1.33333333333333	2.66666666666667	0.0000	0.1339	0.1049	0.0898	0.1627	0.1347	0.0796	0.129066666666667	0.697276116009793	0.643398687441569	1	no	-	--	-	-	-	-
Unigene0000465	7.66666666666667	13	0.8402	0.2603	0.7477	0.9306	0.7730	0.6983	0.616066666666667	0.800633333333333	0.378055203419146	0.619857390403994	1	no	-	--	-	-	-	-
Unigene0000466	43.3333333333333	55.3333333333333	1.3095	1.5604	1.0024	1.2762	1.2890	1.1303	1.29076666666667	1.23183333333333	-0.0674211535726846	0.90325634799725	1	no	-	--	-	-	-	-
Unigene0000467	6.66666666666667	14.6666666666667	0.2809	0.8701	0.4772	0.1750	1.0571	1.5173	0.542733333333333	0.916466666666667	0.755838890485301	0.387241356073673	1	no	-	--	-	-	-	-
Unigene0000468	3.66666666666667	12	0.2089	0.2588	0.2028	0.8242	0.1572	0.6076	0.2235	0.529666666666667	1.24480988744405	0.167655381811825	0.903854153202274	no	-	--	-	-	-	-
Unigene0000469	717.666666666667	977.333333333333	21.8394	18.9136	23.6266	22.2469	23.2246	21.8689	21.4598666666667	22.4468	0.0648686775919696	0.852591321597615	1	no	Zcchc10	PREDICTED: zinc finger CCHC domain-containing protein 10-like [Sinocyclocheilus anshuiensis]	-	-	GO:0005488//binding;GO:0046914//transition metal ion binding;GO:0043167//ion binding;GO:0046872//metal ion binding;GO:0043169//cation binding	-
Unigene0000470	16	18	2.2824	0.4243	1.1966	1.4790	0.7560	0.9675	1.3011	1.0675	-0.285495779189044	0.709176475554093	1	no	-	--	-	-	-	-
Unigene0000471	866	1068.33333333333	15.4936	17.6857	19.1382	17.2217	18.4283	14.2685	17.4391666666667	16.6395	-0.0677190197354249	0.845593545215685	1	no	naa20	N-alpha-acetyltransferase 20 [Esox lucius]	-	GO:0044424//intracellular part;GO:0043229//intracellular organelle;GO:0005623//cell;GO:0005622//intracellular;GO:0044464//cell part;GO:0043226//organelle;GO:0043231//intracellular membrane-bounded organelle;GO:0043227//membrane-bounded organelle	GO:0016410//N-acyltransferase activity;GO:0016407//acetyltransferase activity;GO:0016746//transferase activity, transferring acyl groups;GO:0016747//transferase activity, transferring acyl groups other than amino-acyl groups;GO:0034212//peptide N-acetyltransferase activity;GO:0003824//catalytic activity;GO:0016740//transferase activity;GO:0008080//N-acetyltransferase activity	-
Unigene0000472	32	18.3333333333333	3.1663	4.5126	1.5370	1.1179	1.1123	1.5790	3.07196666666667	1.26973333333333	-1.27463702463414	0.0349054246502075	0.588819194954226	no	-	--	-	-	-	-
Unigene0000473	3.33333333333333	2.33333333333333	0.6287	0.0000	0.1962	0.0000	0.1352	0.2799	0.274966666666667	0.138366666666667	-0.990760304691596	0.52722199788182	1	no	-	--	-	-	-	-
Unigene0000474	28	33.6666666666667	1.6023	0.6175	0.7399	0.9253	0.5884	1.0476	0.986566666666667	0.853766666666667	-0.208574706504749	0.74452783351307	1	no	-	PREDICTED: inositol hexakisphosphate and diphosphoinositol-pentakisphosphate kinase 1-like isoform X3 [Cyprinus carpio]	ko04070//Phosphatidylinositol signaling system//Signal transduction//Environmental Information Processing	-	-	-
Unigene0000475	15.3333333333333	11.6666666666667	1.5414	0.6612	0.3454	0.4063	0.2231	0.7022	0.849333333333333	0.443866666666667	-0.936204502003398	0.216091077531986	0.943780713181888	no	-	--	-	-	-	-
Unigene0000476	120.333333333333	297.333333333333	0.4892	0.7044	0.9030	1.7901	1.3329	0.9363	0.698866666666667	1.3531	0.953179322442756	0.0351854088370576	0.589897380267514	no	AIM1	PREDICTED: serine-rich adhesin for platelets-like [Sinocyclocheilus anshuiensis]	-	-	-	-
Unigene0000477	138	233	2.2829	2.9802	3.7355	4.0594	4.6920	3.2299	2.99953333333333	3.99376666666667	0.41301198264772	0.337878038464368	1	no	-	Zgc:162945 protein [Danio rerio]	-	-	-	-
Unigene0000478	87.6666666666667	127.333333333333	1.7574	1.4899	1.2516	1.4079	1.7736	1.7216	1.49963333333333	1.63436666666667	0.124121886519555	0.78070626664837	1	no	-	--	-	-	-	-
Unigene0000479	13	8.33333333333333	1.9544	0.6319	0.4950	0.4765	0.3838	0.5297	1.0271	0.463333333333333	-1.1484542692247	0.132563476237964	0.862395120774538	no	-	PREDICTED: transcription factor E2-alpha-like isoform X5 [Sinocyclocheilus grahami]	-	-	-	-
Unigene0000480	30.6666666666667	42	1.7291	0.5022	0.7607	0.2244	1.5999	1.2799	0.997333333333333	1.03473333333333	0.0531113364595582	0.955725834565711	1	no	-	--	-	-	-	-
Unigene0000481	7.33333333333333	8	0.3672	0.8533	0.5348	0.3432	0.7602	0.4006	0.5851	0.501333333333333	-0.222913056975427	0.79783507540524	1	no	-	--	-	-	-	-
Unigene0000482	462.666666666667	696.666666666667	2.6040	3.8357	4.2056	4.0534	4.6055	3.8700	3.54843333333333	4.1763	0.235043148301458	0.530754375256095	1	no	TRIM35	PREDICTED: zinc-binding protein A33-like [Sinocyclocheilus rhinocerous]	-	-	-	-
Unigene0000483	174.666666666667	184.333333333333	3.5827	3.0129	3.1678	1.7008	3.0501	3.1241	3.25446666666667	2.625	-0.310103714959811	0.472470172601718	1	no	MYH6	PREDICTED: LOW QUALITY PROTEIN: myosin-7-like [Cyprinus carpio]	ko04530//Tight junction//Cellular commiunity//Cellular Processes	GO:0044464//cell part;GO:0044424//intracellular part;GO:0043228//non-membrane-bounded organelle;GO:0005856//cytoskeleton;GO:0043232//intracellular non-membrane-bounded organelle;GO:0043229//intracellular organelle;GO:0005622//intracellular;GO:0005623//cell;GO:0043226//organelle;GO:0015629//actin cytoskeleton	GO:0005488//binding;GO:0097159//organic cyclic compound binding;GO:0016787//hydrolase activity;GO:1901363//heterocyclic compound binding;GO:0097367//carbohydrate derivative binding;GO:0032549//ribonucleoside binding;GO:0016817//hydrolase activity, acting on acid anhydrides;GO:0005515//protein binding;GO:0003824//catalytic activity;GO:0036094//small molecule binding;GO:0032550//purine ribonucleosi…	GO:0048646//anatomical structure formation involved in morphogenesis;GO:0044763//single-organism cellular process;GO:0071840//cellular component organization or biogenesis;GO:0006936//muscle contraction;GO:0009653//anatomical structure morphogenesis;GO:0003012//muscle system process;GO:0022607//cellular component assembly;GO:0050879//multicellular organismal movement;GO:0044707//single-multicellu…
Unigene0000484	15	18	1.1190	0.8001	1.3789	0.4827	1.2311	1.3951	1.09933333333333	1.0363	-0.0851871866716093	0.924951420912451	1	no	-	--	-	-	-	-
Unigene0000485	2	0	0.0896	0.0833	0.2609	0.0000	0.0000	0.0000	0.1446	0.001	-7.17592374206376	0.0689359328668994	0.723586316717615	no	-	--	-	-	-	-
Unigene0000486	2366	3128	37.4355	40.5710	53.6449	39.7078	51.8632	44.8648	43.8838	45.4786	0.0514993859498638	0.876128498445006	1	no	Haus7	PREDICTED: HAUS augmin-like complex subunit 7 [Sinocyclocheilus rhinocerous]	-	-	-	-
Unigene0000487	238.333333333333	329	14.4940	16.3118	17.4568	16.7922	17.2800	17.0935	16.0875333333333	17.0552333333333	0.0842713549452308	0.82783274823396	1	no	-	--	-	-	-	-
Unigene0000488	229	429.333333333333	4.1531	9.9634	3.2080	17.1343	3.8022	2.2390	5.77483333333333	7.72516666666667	0.419786749080489	0.529656036076649	1	no	RGS16	PREDICTED: regulator of G-protein signaling 16-like [Cyprinus carpio]	-	-	-	GO:0065007//biological regulation;GO:0009966//regulation of signal transduction;GO:0045744//negative regulation of G-protein coupled receptor protein signaling pathway;GO:0010646//regulation of cell communication;GO:0048523//negative regulation of cellular process;GO:0009968//negative regulation of signal transduction;GO:0010648//negative regulation of cell communication;GO:0048583//regulation of…
Unigene0000489	857.333333333333	1154.33333333333	9.0792	11.1821	8.0499	15.4826	6.4579	6.1586	9.43706666666667	9.36636666666667	-0.010848978295178	0.980682929761494	1	no	galc	PREDICTED: galactocerebrosidase-like [Sinocyclocheilus grahami]	ko01100//Metabolic pathways//Global and Overview//Metabolism;ko04142//Lysosome//Transport and catabolism//Cellular Processes;ko00600//Sphingolipid metabolism//Lipid metabolism//Metabolism	GO:0044444//cytoplasmic part;GO:0005737//cytoplasm;GO:0044464//cell part;GO:0000323//lytic vacuole;GO:0044424//intracellular part;GO:0043226//organelle;GO:0005773//vacuole;GO:0043227//membrane-bounded organelle;GO:0005622//intracellular;GO:0043229//intracellular organelle;GO:0043231//intracellular membrane-bounded organelle;GO:0005623//cell	GO:0003824//catalytic activity;GO:0016787//hydrolase activity;GO:0016798//hydrolase activity, acting on glycosyl bonds;GO:0004553//hydrolase activity, hydrolyzing O-glycosyl compounds	GO:0006687//glycosphingolipid metabolic process;GO:0008152//metabolic process;GO:0006643//membrane lipid metabolic process;GO:1901564//organonitrogen compound metabolic process;GO:0044238//primary metabolic process;GO:0006665//sphingolipid metabolic process;GO:0019374//galactolipid metabolic process;GO:0044255//cellular lipid metabolic process;GO:0044237//cellular metabolic process;GO:1903509//li…
Unigene0000490	4.66666666666667	11.6666666666667	0.2702	0.4185	0.3934	1.0100	0.7457	0.3368	0.3607	0.6975	0.951393793816342	0.235445139118747	0.957382567380363	no	-	--	-	-	-	-
Unigene0000491	94	179.333333333333	1.8876	1.9543	2.0008	2.7839	3.1656	2.6065	1.94756666666667	2.852	0.550301268117076	0.195998587607386	0.931031722230693	no	Kazald1	PREDICTED: kazal-type serine protease inhibitor domain-containing protein 1 [Sinocyclocheilus anshuiensis]	-	-	-	GO:0040007//growth;GO:0016049//cell growth;GO:0044763//single-organism cellular process;GO:0009987//cellular process;GO:0044699//single-organism process
Unigene0000492	8.66666666666667	21.6666666666667	0.6059	0.4505	0.3529	0.8682	1.0946	0.6798	0.469766666666667	0.880866666666667	0.906979313217132	0.167919615363905	0.904158745417771	no	-	hypothetical protein cypCar_00035167 [Cyprinus carpio]	-	-	-	-
Unigene0000493	7.33333333333333	20.6666666666667	0.3461	0.6434	0.6301	2.3182	0.3257	0.7551	0.539866666666667	1.133	1.06947281375258	0.195777701414457	0.93095000336797	no	-	--	-	-	-	-
Unigene0000494	32.6666666666667	32.3333333333333	0.6783	0.4278	0.8996	0.3019	0.7659	0.5285	0.668566666666667	0.5321	-0.32937402347527	0.565519087699403	1	no	tc1a	transposase [Acipenser fulvescens]	-	-	-	-
Unigene0000495	115	136.666666666667	0.9280	2.2810	2.7180	2.6598	1.3816	1.4655	1.97566666666667	1.83563333333333	-0.10606164673128	0.841327656565721	1	no	-	gag-like protein [Danio rerio]	ko01100//Metabolic pathways//Global and Overview//Metabolism;ko01110//Biosynthesis of secondary metabolites//Global and Overview//Metabolism;ko01130//Biosynthesis of antibiotics//Global and Overview//Metabolism;ko00480//Glutathione metabolism//Metabolism of other amino acids//Metabolism;ko00330//Arginine and proline metabolism//Amino acid metabolism//Metabolism	-	-	-
Unigene0000496	20	27.3333333333333	1.9763	1.4836	0.7195	2.2259	0.8583	0.9476	1.39313333333333	1.34393333333333	-0.0518717672206776	0.974139969520032	1	no	NLRC3	PREDICTED: NACHT, LRR and PYD domains-containing protein 12-like, partial [Sinocyclocheilus grahami]	ko04621//NOD-like receptor signaling pathway//Immune system//Organismal Systems	-	-	-
Unigene0000497	730.333333333333	774.666666666667	3.0916	1.3616	3.8512	2.0327	2.4828	2.4202	2.76813333333333	2.3119	-0.259834439097189	0.535956749352852	1	no	ptprf	PREDICTED: receptor-type tyrosine-protein phosphatase F-like isoform X2 [Sinocyclocheilus rhinocerous]	ko04514//Cell adhesion molecules (CAMs)//Signaling molecules and interaction//Environmental Information Processing;ko04910//Insulin signaling pathway//Endocrine system//Organismal Systems;ko04520//Adherens junction//Cellular commiunity//Cellular Processes	-	-	-
Unigene0000498	3	14	0.2159	0.0000	0.1965	0.3363	0.2844	0.8412	0.137466666666667	0.4873	1.82572839054536	0.0491138400505242	0.653555312626629	no	ARL3	PREDICTED: ADP-ribosylation factor-like protein 3 [Poecilia formosa]	-	GO:0044464//cell part;GO:0005623//cell	GO:0032549//ribonucleoside binding;GO:0097159//organic cyclic compound binding;GO:0005488//binding;GO:0032550//purine ribonucleoside binding;GO:0001883//purine nucleoside binding;GO:0097367//carbohydrate derivative binding;GO:1901363//heterocyclic compound binding;GO:0036094//small molecule binding;GO:0001882//nucleoside binding	GO:0023052//signaling;GO:0007154//cell communication;GO:0048638//regulation of developmental growth;GO:0045664//regulation of neuron differentiation;GO:0044700//single organism signaling;GO:0022604//regulation of cell morphogenesis;GO:0007165//signal transduction;GO:0022603//regulation of anatomical structure morphogenesis;GO:0044767//single-organism developmental process;GO:0065008//regulation o…
Unigene0000499	13.3333333333333	11.3333333333333	1.1739	0.9233	1.0521	0.7877	0.6118	0.6192	1.04976666666667	0.6729	-0.64160466710807	0.306413322359577	0.996645002446925	no	-	--	-	-	-	-
Unigene0000500	4.33333333333333	9.33333333333333	0.4195	0.0000	0.4887	0.5227	0.3789	0.6276	0.302733333333333	0.509733333333333	0.751695163410315	0.42723447627426	1	no	-	--	-	-	-	-
Unigene0000501	4	9.33333333333333	0.1556	0.5062	0.1699	1.1633	0.0586	0.1455	0.277233333333333	0.4558	0.717300193305849	0.551764190205307	1	no	-	--	-	-	-	-
Unigene0000502	8.66666666666667	11.6666666666667	1.0690	0.4968	0.5190	0.8326	0.8718	0.3887	0.694933333333333	0.6977	0.0057322504572703	1	1	no	-	--	-	-	-	-
Unigene0000503	17.3333333333333	17.6666666666667	1.5500	0.6860	1.1286	1.4256	0.8334	0.3221	1.12153333333333	0.860366666666667	-0.382448963335954	0.595488633254501	1	no	-	--	-	-	-	-
Unigene0000504	6.33333333333333	2.66666666666667	0.7942	0.0000	0.4206	0.1350	0.1087	0.1350	0.404933333333333	0.126233333333333	-1.68159148728304	0.16330710154433	0.898972743813926	no	-	--	-	-	-	-
Unigene0000505	8.66666666666667	7	0.3033	1.2688	0.2209	0.9450	0.0000	0.0473	0.597666666666667	0.330766666666667	-0.853527229537323	0.497638538248501	1	no	-	--	-	-	-	-
Unigene0000506	572.333333333333	725	15.8194	15.4178	20.0629	18.6033	18.2435	13.6274	17.1000333333333	16.8247333333333	-0.0234154986197375	0.949470544121443	1	no	fam213b	PREDICTED: prostamide/prostaglandin F synthase [Sinocyclocheilus anshuiensis]	ko01100//Metabolic pathways//Global and Overview//Metabolism;ko00590//Arachidonic acid metabolism//Lipid metabolism//Metabolism	GO:0044444//cytoplasmic part;GO:0044424//intracellular part;GO:0005737//cytoplasm;GO:0005623//cell;GO:0005622//intracellular;GO:0044464//cell part	GO:0003824//catalytic activity;GO:0016491//oxidoreductase activity;GO:0016614//oxidoreductase activity, acting on CH-OH group of donors	GO:0006631//fatty acid metabolic process;GO:0044237//cellular metabolic process;GO:0006629//lipid metabolic process;GO:0071704//organic substance metabolic process;GO:0009987//cellular process;GO:0044238//primary metabolic process;GO:0044710//single-organism metabolic process;GO:0006690//icosanoid metabolic process;GO:0043436//oxoacid metabolic process;GO:0032787//monocarboxylic acid metabolic pr…
Unigene0000507	495.666666666667	774.666666666667	9.0321	9.8048	10.2526	11.9040	11.1273	11.6699	9.6965	11.5670666666667	0.254487054282852	0.469271096123701	1	no	RNF25	PREDICTED: E3 ubiquitin-protein ligase RNF25-like isoform X1 [Sinocyclocheilus rhinocerous]	-	-	GO:0043167//ion binding;GO:0043169//cation binding;GO:0005488//binding	-
Unigene0000508	6353	7765.66666666667	41.7335	38.8636	48.7748	37.6704	43.2646	41.1845	43.1239666666667	40.7065	-0.0832307055024622	0.785277622280766	1	no	ncapg2	PREDICTED: condensin-2 complex subunit G2 [Cyprinus carpio]	-	-	-	-
Unigene0000509	10.6666666666667	16	0.2232	0.3457	0.4333	0.1854	0.6720	0.3710	0.334066666666667	0.409466666666667	0.293609974546297	0.747328962965968	1	no	-	--	-	-	-	-
Unigene0000510	208.666666666667	275.666666666667	2.7825	2.1068	3.4490	2.9317	3.0831	2.5726	2.77943333333333	2.86246666666667	0.0424681147251498	0.920218010358617	1	no	c1galt1a	PREDICTED: glycoprotein-N-acetylgalactosamine 3-beta-galactosyltransferase 1-A-like [Sinocyclocheilus rhinocerous]	ko01100//Metabolic pathways//Global and Overview//Metabolism;ko00512//Mucin type O-glycan biosynthesis//Glycan biosynthesis and metabolism//Metabolism	GO:0016020//membrane;GO:0031224//intrinsic component of membrane;GO:0044425//membrane part	GO:0048531//beta-1,3-galactosyltransferase activity;GO:0016758//transferase activity, transferring hexosyl groups;GO:0043167//ion binding;GO:0016740//transferase activity;GO:0008378//galactosyltransferase activity;GO:0003824//catalytic activity;GO:0043169//cation binding;GO:0005488//binding;GO:0016757//transferase activity, transferring glycosyl groups	GO:0044767//single-organism developmental process;GO:0044763//single-organism cellular process;GO:0006493//protein O-linked glycosylation;GO:0006464//cellular protein modification process;GO:0009059//macromolecule biosynthetic process;GO:0044237//cellular metabolic process;GO:0071704//organic substance metabolic process;GO:0008152//metabolic process;GO:0019538//protein metabolic process;GO:000910…
Unigene0000511	22.3333333333333	26.3333333333333	0.2220	2.4250	0.6467	1.6602	0.5432	0.6229	1.0979	0.9421	-0.220794546206524	0.798930116432554	1	no	-	--	-	-	-	-
Unigene0000512	1458.33333333333	2160.66666666667	21.7596	17.7660	20.1077	12.1336	22.5076	32.4763	19.8777666666667	22.3725	0.170570803985033	0.663005600653507	1	no	fbxo43	PREDICTED: F-box only protein 43-like [Sinocyclocheilus rhinocerous]	ko04114//Oocyte meiosis//Cell growth and death//Cellular Processes	-	-	-
Unigene0000513	9.33333333333333	11	0.5087	0.6080	0.6350	0.5434	0.6018	0.4530	0.5839	0.532733333333333	-0.132307757413303	0.881286584342424	1	no	-	--	-	-	-	-
Unigene0000514	17	7	1.8259	1.0183	1.2631	0.1138	0.6872	0.5122	1.3691	0.437733333333333	-1.64510367157407	0.0299812156408298	0.564227284038315	no	-	--	-	-	-	-
Unigene0000515	44.3333333333333	76.6666666666667	5.9549	1.7648	2.6394	7.3130	1.8840	3.4969	3.45303333333333	4.2313	0.293236715585739	0.641975634507029	1	no	-	--	-	-	-	-
Unigene0000516	87.3333333333333	46	8.2633	4.7700	6.8404	3.4685	2.4227	2.0062	6.62456666666667	2.63246666666667	-1.3314108231264	0.00745839001346513	0.355696411513827	no	-	--	-	-	-	-
Unigene0000517	5.66666666666667	6.66666666666667	0.4249	0.1580	0.6188	0.2118	0.1279	0.7416	0.400566666666667	0.360433333333333	-0.152309932041387	0.929334975041529	1	no	-	--	-	-	-	-
Unigene0000518	1686	2823	14.2173	16.6062	17.6105	20.7734	23.4228	18.5506	16.1446666666667	20.9156	0.37352173033172	0.250271393248073	0.965714310813944	no	Spg7	PREDICTED: paraplegin-like isoform X3 [Sinocyclocheilus anshuiensis]	-	GO:0044425//membrane part;GO:0031224//intrinsic component of membrane;GO:0016020//membrane	GO:0032549//ribonucleoside binding;GO:0008233//peptidase activity;GO:0097367//carbohydrate derivative binding;GO:0036094//small molecule binding;GO:0001883//purine nucleoside binding;GO:0046914//transition metal ion binding;GO:0001882//nucleoside binding;GO:0097159//organic cyclic compound binding;GO:0003824//catalytic activity;GO:0043169//cation binding;GO:0043167//ion binding;GO:0004175//endope…	GO:0051604//protein maturation;GO:0016485//protein processing;GO:0019538//protein metabolic process;GO:0006508//proteolysis;GO:0008152//metabolic process;GO:0044238//primary metabolic process;GO:0043170//macromolecule metabolic process;GO:0071704//organic substance metabolic process;GO:0010467//gene expression
Unigene0000519	369.666666666667	583.333333333333	26.1050	37.4284	26.4233	52.5443	24.6681	27.9874	29.9855666666667	35.0666	0.225829318942905	0.589194604031058	1	no	S100A4	PREDICTED: ictacalcin-like isoform X1 [Sinocyclocheilus anshuiensis]	-	-	GO:0005488//binding;GO:0046872//metal ion binding;GO:0043167//ion binding;GO:0043169//cation binding	-
Unigene0000520	20	26.6666666666667	1.2013	1.4449	1.0805	0.5283	1.4362	1.8060	1.24223333333333	1.25683333333333	0.0168571631330251	0.999999999999999	1	no	-	--	-	-	-	-
Unigene0000521	30.3333333333333	16	1.6319	2.3336	1.1426	1.0950	0.2835	0.5478	1.7027	0.6421	-1.40695436406274	0.0295662897862151	0.56218808418356	no	-	--	-	-	-	-
Unigene0000522	49.3333333333333	61	2.6943	6.3443	2.7467	6.0435	2.2310	2.3514	3.92843333333333	3.54196666666667	-0.149403442661614	0.809145324278458	1	no	-	--	-	-	-	-
Unigene0000523	87	107.666666666667	2.7854	0.2649	0.2264	1.4288	0.4876	0.7753	1.09223333333333	0.897233333333333	-0.283725967052867	0.727461345931602	1	no	-	--	-	-	-	-
Unigene0000524	39.6666666666667	42.6666666666667	2.1448	3.3440	1.8136	2.5434	2.1353	1.2076	2.43413333333333	1.9621	-0.311009624477426	0.571099711091479	1	no	-	--	-	-	-	-
Unigene0000525	838.333333333333	1440	6.3309	9.8406	12.1924	11.5752	15.6069	11.5392	9.45463333333333	12.9071	0.449071474450448	0.231161570679015	0.953849076866028	no	MSI1	PREDICTED: RNA-binding protein Musashi homolog 1-like [Danio rerio]	ko03015//mRNA surveillance pathway//Translation//Genetic Information Processing	-	GO:0005488//binding;GO:0097159//organic cyclic compound binding	GO:0007275//multicellular organism development;GO:0044699//single-organism process;GO:0048731//system development;GO:0032502//developmental process;GO:0007399//nervous system development;GO:0032501//multicellular organismal process;GO:0048856//anatomical structure development;GO:0044707//single-multicellular organism process;GO:0044767//single-organism developmental process
Unigene0000526	9	9.33333333333333	1.0450	1.3875	1.0870	0.9301	1.2361	0.6514	1.17316666666667	0.9392	-0.320903671752021	0.697197309497645	1	no	-	--	-	-	-	-
Unigene0000527	2312	2481.33333333333	88.0750	74.7317	83.4497	62.2509	72.5364	67.0391	82.0854666666667	67.2754666666667	-0.287046320294983	0.367203886664206	1	no	DYNLRB1	PREDICTED: dynein light chain roadblock-type 1 isoform X1 [Sinocyclocheilus anshuiensis]	-	GO:0015630//microtubule cytoskeleton;GO:0043228//non-membrane-bounded organelle;GO:0005622//intracellular;GO:0044464//cell part;GO:0044424//intracellular part;GO:0043232//intracellular non-membrane-bounded organelle;GO:0005623//cell;GO:0044446//intracellular organelle part;GO:0044430//cytoskeletal part;GO:0044422//organelle part;GO:0005856//cytoskeleton;GO:0043226//organelle;GO:0005875//microtubu…	-	GO:0009987//cellular process;GO:0044699//single-organism process;GO:0023052//signaling;GO:0007154//cell communication;GO:0050789//regulation of biological process;GO:0044763//single-organism cellular process;GO:0007167//enzyme linked receptor protein signaling pathway;GO:0051716//cellular response to stimulus;GO:0007165//signal transduction;GO:0065007//biological regulation;GO:0050896//response t…
Unigene0000528	304.666666666667	497.666666666667	2.6863	2.6600	4.9442	3.2213	4.8979	5.2846	3.43016666666667	4.46793333333333	0.381328982829757	0.36646544356931	1	no	tbx1	PREDICTED: T-box transcription factor TBX1 isoform X1 [Sinocyclocheilus anshuiensis]	-	GO:0043231//intracellular membrane-bounded organelle;GO:0005622//intracellular;GO:0005623//cell;GO:0043229//intracellular organelle;GO:0044424//intracellular part;GO:0044464//cell part;GO:0043226//organelle;GO:0043227//membrane-bounded organelle	GO:0005488//binding;GO:0003677//DNA binding;GO:0003676//nucleic acid binding;GO:0001071//nucleic acid binding transcription factor activity;GO:0005515//protein binding;GO:1901363//heterocyclic compound binding;GO:0097159//organic cyclic compound binding;GO:0046983//protein dimerization activity	GO:0003143//embryonic heart tube morphogenesis;GO:0009653//anatomical structure morphogenesis;GO:0044260//cellular macromolecule metabolic process;GO:0016070//RNA metabolic process;GO:0008152//metabolic process;GO:0006139//nucleobase-containing compound metabolic process;GO:0034641//cellular nitrogen compound metabolic process;GO:0043170//macromolecule metabolic process;GO:0071704//organic substa…
Unigene0000529	9	3.66666666666667	0.5395	0.8596	0.4490	0.1921	0.2321	0.1441	0.616033333333333	0.189433333333333	-1.70131820205341	0.0315198126484726	0.572687987697243	no	-	--	-	-	-	-
Unigene0000530	7.66666666666667	7.66666666666667	0.9180	0.4266	0.5348	0.5148	0.5528	0.3434	0.626466666666667	0.470333333333333	-0.413554165890979	0.602673472228961	1	no	-	--	-	-	-	-
Unigene0000531	594.666666666667	362	60.6186	34.6729	36.8641	11.8288	9.5901	36.5940	44.0518666666667	19.3376333333333	-1.18779191450494	0.0206210271363975	0.499065937468896	no	-	--	-	-	-	-
Unigene0000532	8867.33333333333	13442.3333333333	30.9398	33.3735	45.6325	41.3548	55.8235	34.7863	36.6486	43.9882	0.263358479744275	0.424559035922261	1	no	EEF2	PREDICTED: elongation factor 2 [Sinocyclocheilus anshuiensis]	-	-	-	-
Unigene0000533	1615.33333333333	801.333333333333	18.3725	7.5383	8.1287	4.2982	2.7660	5.0509	11.3465	4.03836666666667	-1.49040353261826	0.000577915516994143	0.100476789598656	no	Prss56	PREDICTED: serine protease 56 [Pygocentrus nattereri]	-	-	-	-
Unigene0000534	3723.66666666667	4149.66666666667	41.6523	36.2439	45.2384	31.1361	35.0488	39.0070	41.0448666666667	35.0639666666667	-0.227212588136296	0.466755422481812	1	no	ZNF706	PREDICTED: zinc finger protein 706 isoform X1 [Sinocyclocheilus rhinocerous]	-	-	-	-
Unigene0000535	34.6666666666667	34.6666666666667	2.1538	1.2915	2.6813	0.6926	2.3012	1.9056	2.0422	1.63313333333333	-0.32248158030065	0.586691973915042	1	no	-	--	-	-	-	-
Unigene0000536	523.333333333333	428	9.7154	3.8596	4.9722	2.9076	2.9472	5.2017	6.1824	3.6855	-0.74630664086509	0.0968899049327636	0.793200786474044	no	CRISPLD1	PREDICTED: cysteine-rich secretory protein LCCL domain-containing 1-like [Sinocyclocheilus anshuiensis]	-	-	-	-
Unigene0000537	48.3333333333333	33.3333333333333	3.5481	2.5962	3.3531	1.0818	2.2731	1.7412	3.1658	1.6987	-0.898139028890609	0.0885458098585075	0.771901147751568	no	-	--	-	-	-	-
Unigene0000538	8	6.33333333333333	0.3839	0.7136	0.2795	0.4783	0.2408	0.0798	0.459	0.2663	-0.785441725090556	0.371583716360852	1	no	-	--	-	-	-	-
Unigene0000539	23.6666666666667	16.6666666666667	1.3019	0.9351	1.3789	0.2950	0.9355	0.7747	1.2053	0.6684	-0.850608640428668	0.169406312457536	0.906287126875921	no	-	--	-	-	-	-
Unigene0000540	2.66666666666667	12.6666666666667	0.0898	0.5009	0.0654	1.6787	0.2704	0.2239	0.2187	0.724333333333333	1.7277005482994	0.130703024119656	0.859219040516213	no	-	--	-	-	-	-
Unigene0000541	678.333333333333	457	12.3521	6.5835	7.1807	3.6776	3.3486	5.8512	8.70543333333333	4.29246666666667	-1.02010918222748	0.0135909523961566	0.434573903270403	no	ZNF271	PREDICTED: zinc finger protein 239-like isoform X1 [Sinocyclocheilus grahami]	-	-	-	-
Unigene0000542	850.333333333333	1447	2.6170	2.5524	2.9416	3.3691	4.0205	3.2742	2.70366666666667	3.5546	0.394769928520239	0.245009742632027	0.962309932134632	no	aasdh	PREDICTED: acyl-CoA synthetase family member 4 isoform X1 [Sinocyclocheilus anshuiensis]	-	-	GO:0097159//organic cyclic compound binding;GO:0032550//purine ribonucleoside binding;GO:0001882//nucleoside binding;GO:1901363//heterocyclic compound binding;GO:0097367//carbohydrate derivative binding;GO:0036094//small molecule binding;GO:0001883//purine nucleoside binding;GO:0032549//ribonucleoside binding;GO:0016877//ligase activity, forming carbon-sulfur bonds;GO:0016874//ligase activity;GO:…	GO:0044281//small molecule metabolic process;GO:0032787//monocarboxylic acid metabolic process;GO:0044699//single-organism process;GO:0044710//single-organism metabolic process;GO:0044238//primary metabolic process;GO:0044763//single-organism cellular process;GO:0006082//organic acid metabolic process;GO:0071704//organic substance metabolic process;GO:0044237//cellular metabolic process;GO:000998…
Unigene0000543	19.3333333333333	42.3333333333333	0.4614	0.5718	0.8398	0.8144	1.9680	0.5992	0.624333333333333	1.1272	0.852355117900386	0.175518952665562	0.913265852881107	no	-	PREDICTED: uncharacterized protein LOC107715642 [Sinocyclocheilus rhinocerous]	-	-	-	-
Unigene0000544	18.6666666666667	19.3333333333333	1.7251	0.6751	1.9173	1.0183	1.0936	1.3584	1.43916666666667	1.15676666666667	-0.315135791664195	0.63956989086063	1	no	-	--	-	-	-	-
Unigene0000545	2.33333333333333	6.66666666666667	0.0000	0.3020	0.1774	0.2024	0.5503	0.3544	0.1598	0.369033333333333	1.20748372688902	0.279933089949469	0.984384959504768	no	-	--	-	-	-	-
Unigene0000546	19.6666666666667	38	0.7509	1.5820	0.3645	2.1522	0.5653	0.9362	0.899133333333333	1.2179	0.437788705182758	0.540491678819715	1	no	-	--	-	-	-	-
Unigene0000547	556.666666666667	466	11.4587	7.0656	8.8891	4.5730	5.2572	7.3881	9.1378	5.73943333333333	-0.670938562941717	0.0861706018581247	0.767087074443991	no	-	PREDICTED: dynein light chain 1, cytoplasmic-like [Cyprinus carpio]	-	-	-	-
Unigene0000548	2.66666666666667	2	0.2773	0.1289	0.5048	0.0000	0.2088	0.3458	0.303666666666667	0.184866666666667	-0.716003437649933	0.578658542423262	1	no	-	--	-	-	-	-
Unigene0000549	30.3333333333333	36	3.1226	2.2470	2.6405	1.9456	2.8056	2.5117	2.67003333333333	2.42096666666667	-0.141274537398748	0.797313416513084	1	no	-	--	-	-	-	-
Unigene0000550	978.666666666667	1380.66666666667	5.1942	5.7613	5.9227	5.9132	6.6485	5.7503	5.62606666666667	6.104	0.117628314052438	0.726851398724746	1	no	PLEKHM3	PREDICTED: pleckstrin homology domain-containing family M member 3-like isoform X1 [Sinocyclocheilus rhinocerous]	-	-	-	-
Unigene0000551	140.333333333333	72	27.5479	6.2569	6.7870	7.2915	3.8200	3.4862	13.5306	4.8659	-1.47544723889881	0.0180701822081054	0.479309607227424	no	-	--	-	-	-	-
Unigene0000552	1228	1462	8.9626	6.4785	8.8777	4.6568	6.1836	11.0932	8.10626666666667	7.3112	-0.148929417916675	0.707210788702553	1	no	AP3B2	PREDICTED: AP-3 complex subunit beta-2 isoform X4 [Sinocyclocheilus rhinocerous]	ko04142//Lysosome//Transport and catabolism//Cellular Processes	GO:0044464//cell part;GO:0030117//membrane coat;GO:0048475//coated membrane;GO:0044425//membrane part;GO:0032991//macromolecular complex;GO:0005623//cell;GO:0044444//cytoplasmic part;GO:0044424//intracellular part;GO:0030119//AP-type membrane coat adaptor complex;GO:0043234//protein complex;GO:0005622//intracellular;GO:0016020//membrane;GO:0005737//cytoplasm;GO:0098796//membrane protein complex	-	GO:0051179//localization;GO:0006810//transport;GO:0051234//establishment of localization
Unigene0000553	5.33333333333333	1.33333333333333	0.5939	0.4416	0.6054	0.1480	0.0894	0.0740	0.546966666666667	0.1038	-2.39764647104047	0.0166411659969917	0.463729403515843	no	-	PREDICTED: uncharacterized protein LOC109112128 [Cyprinus carpio]	-	-	-	-
Unigene0000554	176.333333333333	418.333333333333	1.5577	2.1663	1.7490	4.6009	3.2582	2.0014	1.82433333333333	3.28683333333333	0.849328947180639	0.0508928039249317	0.659939324955456	no	pol	PREDICTED: olfactory receptor 52D1-like [Fundulus heteroclitus]	-	-	-	-
Unigene0000555	2595.66666666667	3463.33333333333	24.7955	24.1480	21.9521	22.2155	28.3732	21.5851	23.6318666666667	24.0579333333333	0.0257791235142167	0.935649012304507	1	no	-	Uncharacterized protein C3orf30 [Cricetulus griseus]	-	-	-	-
Unigene0000556	15.3333333333333	16.3333333333333	2.2855	1.4484	0.6808	1.4240	0.9384	0.9714	1.47156666666667	1.11126666666667	-0.40514784583502	0.575737245558987	1	no	-	PREDICTED: regucalcin isoform X1 [Oreochromis niloticus]	-	-	-	-
Unigene0000557	0	0.666666666666667	0.0000	0.0000	0.0000	0.0000	0.1459	0.0000	0.001	0.0486333333333333	5.60387357230937	0.551592753294232	1	no	-	--	-	-	-	-
Unigene0000558	130.333333333333	101	6.8622	3.4893	3.7623	1.5342	2.4005	4.1016	4.7046	2.67876666666667	-0.812503144619453	0.115985704119512	0.833020026272906	no	ccdc176	PREDICTED: basal body-orientation factor 1-like [Cyprinus carpio]	-	-	-	-
Unigene0000559	36.6666666666667	44.3333333333333	3.9666	3.4490	4.6586	3.4281	3.3712	4.3870	4.02473333333333	3.72876666666667	-0.110194676715037	0.825147979203953	1	no	-	PREDICTED: RNA-directed DNA polymerase from mobile element jockey-like, partial [Larimichthys crocea]	-	-	-	-
Unigene0000560	569.666666666667	966.666666666667	3.9228	6.6475	6.8188	6.7736	10.7494	5.9419	5.79636666666667	7.82163333333333	0.432321046424136	0.278797097471495	0.984298542294754	no	AKAP17A	PREDICTED: A-kinase anchor protein 17A [Pygocentrus nattereri]	-	GO:0044424//intracellular part;GO:0005623//cell;GO:0044428//nuclear part;GO:0044446//intracellular organelle part;GO:0031974//membrane-enclosed lumen;GO:0016604//nuclear body;GO:0005654//nucleoplasm;GO:0044464//cell part;GO:0005634//nucleus;GO:0070013//intracellular organelle lumen;GO:0043233//organelle lumen;GO:0005622//intracellular;GO:0043231//intracellular membrane-bounded organelle;GO:004445…	GO:0005515//protein binding;GO:0097159//organic cyclic compound binding;GO:0005488//binding	GO:0010467//gene expression;GO:0006396//RNA processing;GO:0006807//nitrogen compound metabolic process;GO:0044238//primary metabolic process;GO:0006139//nucleobase-containing compound metabolic process;GO:0044260//cellular macromolecule metabolic process;GO:0034641//cellular nitrogen compound metabolic process;GO:0090304//nucleic acid metabolic process;GO:1901360//organic cyclic compound metaboli…
Unigene0000561	71	117	0.8977	0.9876	1.4140	1.5524	1.1722	1.4846	1.09976666666667	1.40306666666667	0.351386095126774	0.450006368442359	1	no	nkd2l	PREDICTED: protein naked cuticle homolog 2-like [Sinocyclocheilus anshuiensis]	ko04310//Wnt signaling pathway//Signal transduction//Environmental Information Processing	GO:0044464//cell part;GO:0016020//membrane;GO:0005623//cell	-	GO:0032502//developmental process;GO:0050794//regulation of cellular process;GO:0009653//anatomical structure morphogenesis;GO:0009966//regulation of signal transduction;GO:0023051//regulation of signaling;GO:0048583//regulation of response to stimulus;GO:0023057//negative regulation of signaling;GO:0048856//anatomical structure development;GO:0065007//biological regulation;GO:0048646//anatomical…
Unigene0000562	1876	2965.66666666667	40.5083	47.8252	57.2929	58.2052	64.4328	56.5705	48.5421333333333	59.7361666666667	0.299367147791536	0.358081390211849	1	no	Ppif	PREDICTED: peptidyl-prolyl cis-trans isomerase A-like [Sinocyclocheilus grahami]	ko04020//Calcium signaling pathway//Signal transduction//Environmental Information Processing	-	GO:0016859//cis-trans isomerase activity;GO:0016853//isomerase activity;GO:0003824//catalytic activity	GO:0008152//metabolic process;GO:0044238//primary metabolic process;GO:0044267//cellular protein metabolic process;GO:0009987//cellular process;GO:0071704//organic substance metabolic process;GO:0043170//macromolecule metabolic process;GO:0019538//protein metabolic process;GO:0044237//cellular metabolic process;GO:0044260//cellular macromolecule metabolic process
Unigene0000563	25.3333333333333	17.6666666666667	1.0140	1.3889	1.1269	0.5985	1.0043	0.3327	1.1766	0.645166666666667	-0.866880134454787	0.154199404304408	0.889468170276521	no	-	--	-	-	-	-
Unigene0000564	15.3333333333333	27.6666666666667	0.7857	0.9958	1.0401	1.4240	0.6989	1.6919	0.940533333333333	1.2716	0.435093941432881	0.490549380601634	1	no	-	PREDICTED: neuron navigator 3-like [Poecilia mexicana]	-	-	-	-
Unigene0000565	26.6666666666667	20.3333333333333	0.6857	0.7284	0.8321	0.4069	0.3933	0.5088	0.748733333333333	0.436333333333333	-0.779021292682496	0.15212856819789	0.888326574982746	no	-	--	-	-	-	-
Unigene0000566	11.3333333333333	18	0.7959	0.7398	0.6323	0.5861	0.7626	1.2179	0.722666666666667	0.855533333333333	0.243493715309467	0.700980558438648	1	no	-	--	-	-	-	-
Unigene0000567	94.6666666666667	82.6666666666667	3.3429	2.0331	4.5077	2.8543	2.0194	1.8523	3.29456666666667	2.242	-0.555302442336327	0.25677958756421	0.972027074562455	no	-	--	-	-	-	-
Unigene0000568	211.333333333333	380	1.0511	0.7914	1.3254	0.9366	0.9194	2.4744	1.05596666666667	1.44346666666667	0.450973498082617	0.348131423441195	1	no	CUX2	PREDICTED: homeobox protein cut-like 2 [Sinocyclocheilus anshuiensis]	-	-	-	-
Unigene0000569	989.333333333333	1659.66666666667	4.2162	4.4888	3.6862	7.1998	3.6354	4.5395	4.1304	5.1249	0.311242350984395	0.401068800896716	1	no	Apbb2	PREDICTED: amyloid beta A4 precursor protein-binding family B member 2-like isoform X4 [Sinocyclocheilus grahami]	-	-	-	-
Unigene0000570	1883	1497	44.9012	38.8054	21.6268	19.2369	19.1947	22.5205	35.1111333333333	20.3173666666667	-0.789215138382959	0.031845696053755	0.574598187138731	no	PIM3	PREDICTED: serine/threonine-protein kinase 33-like [Cyprinus carpio]	-	-	-	-
Unigene0000571	34.6666666666667	55	2.0858	3.1593	1.8563	2.6954	4.8266	1.2520	2.36713333333333	2.92466666666667	0.305131234704495	0.603468243816712	1	no	-	PREDICTED: probable serine/threonine-protein kinase clkA [Sinocyclocheilus grahami]	-	-	-	-
Unigene0000572	6	16.6666666666667	1.2184	0.4530	0.3549	1.3665	1.6509	1.0633	0.675433333333333	1.36023333333333	1.00996886674578	0.172652320265039	0.908452276947267	no	-	PREDICTED: probable serine/threonine-protein kinase clkA [Sinocyclocheilus grahami]	-	-	-	-
Unigene0000573	41	217.333333333333	1.8645	2.0685	2.4088	2.6232	17.1595	7.6111	2.11393333333333	9.13126666666667	2.11088512169873	0.000682429618434843	0.111597565112281	no	-	PREDICTED: mucin-2-like [Sinocyclocheilus anshuiensis]	-	-	-	-
Unigene0000574	42	65.6666666666667	3.1069	3.3003	1.9391	3.4568	4.9003	1.5679	2.7821	3.30833333333333	0.249930324389282	0.659995526780507	1	no	-	PREDICTED: mucin-2-like [Sinocyclocheilus anshuiensis]	-	-	-	-
Unigene0000575	64	85.6666666666667	1.6877	3.1374	1.6758	1.9119	3.5803	1.2673	2.16696666666667	2.25316666666667	0.0562770722599955	0.924322432448633	1	no	MUC5B	PREDICTED: mucin-2 [Danio rerio]	-	-	-	-
Unigene0000576	27.3333333333333	30.6666666666667	1.1234	0.8069	1.5988	0.7954	1.3069	1.0504	1.17636666666667	1.0509	-0.162712415972466	0.782185874555551	1	no	-	PREDICTED: transmembrane protein 182 isoform X1 [Hippocampus comes]	-	-	-	-
Unigene0000577	0	0	0.0000	0.0000	0.0000	0.0000	0.0000	0.0000	0.001	0.001	0	notest	notest	notest	-	--	-	-	-	-
Unigene0000578	25.3333333333333	24.3333333333333	1.4380	1.5796	1.3327	1.1404	0.7381	1.2224	1.4501	1.03363333333333	-0.488427892082071	0.384191148638486	1	no	-	--	-	-	-	-
Unigene0000579	2	0.333333333333333	0.5617	0.2610	0.0000	0.0000	0.0000	0.0875	0.274233333333333	0.0291666666666667	-3.23301152145062	0.1880572269144	0.925346303002603	no	-	--	-	-	-	-
Unigene0000580	0	0	0.0000	0.0000	0.0000	0.0000	0.0000	0.0000	0.001	0.001	0	notest	notest	notest	-	--	-	-	-	-
Unigene0000581	37.6666666666667	62.3333333333333	1.0159	1.0094	1.3520	1.4843	1.7141	1.1793	1.12576666666667	1.45923333333333	0.374302753997893	0.461102219059435	1	no	-	--	-	-	-	-
Unigene0000582	27	32.3333333333333	2.6742	1.2428	2.7122	2.7968	2.0130	1.3098	2.20973333333333	2.03986666666667	-0.115397422942045	0.862411109185305	1	no	-	--	-	-	-	-
Unigene0000583	209.333333333333	137.666666666667	11.8805	11.9467	13.7605	7.6188	7.4788	4.0711	12.5292333333333	6.38956666666667	-0.971508140896514	0.0267159308249941	0.542823101457575	no	-	--	-	-	-	-
Unigene0000584	74.6666666666667	5.66666666666667	3.9210	1.6475	4.6151	0.1673	0.2022	0.2344	3.39453333333333	0.2013	-4.07579417487072	1.06957931188268e-09	8.63720946988995e-06	yes	-	--	-	-	-	-
Unigene0000585	4	8.33333333333333	0.5099	0.1185	0.6497	0.3177	0.4797	1.2713	0.426033333333333	0.689566666666667	0.69472372393166	0.501720880088335	1	no	-	--	-	-	-	-
Unigene0000586	1397.33333333333	2007.66666666667	11.0662	13.5413	16.8530	13.7174	18.9729	14.2537	13.8201666666667	15.648	0.179203261143787	0.606119110928802	1	no	PGR	PREDICTED: LOW QUALITY PROTEIN: progesterone receptor-like [Cyprinus carpio]	ko04114//Oocyte meiosis//Cell growth and death//Cellular Processes;ko04914//Progesterone-mediated oocyte maturation//Endocrine system//Organismal Systems	GO:0043226//organelle;GO:0043231//intracellular membrane-bounded organelle;GO:0005623//cell;GO:0005622//intracellular;GO:0044424//intracellular part;GO:0043229//intracellular organelle;GO:0043227//membrane-bounded organelle;GO:0044464//cell part	GO:0003677//DNA binding;GO:0060089//molecular transducer activity;GO:0001071//nucleic acid binding transcription factor activity;GO:0043167//ion binding;GO:0003676//nucleic acid binding;GO:1901363//heterocyclic compound binding;GO:0046914//transition metal ion binding;GO:0043169//cation binding;GO:0005488//binding;GO:0097159//organic cyclic compound binding;GO:0038023//signaling receptor activity…	GO:0023052//signaling;GO:0009725//response to hormone;GO:0071495//cellular response to endogenous stimulus;GO:0050896//response to stimulus;GO:0018130//heterocycle biosynthetic process;GO:0044238//primary metabolic process;GO:0006807//nitrogen compound metabolic process;GO:0007154//cell communication;GO:0007165//signal transduction;GO:1901576//organic substance biosynthetic process;GO:0042221//re…
Unigene0000587	669	439.333333333333	77.9224	64.6076	16.8301	21.0192	20.2134	32.0475	53.1200333333333	24.4267	-1.12079708053459	0.0265895877747936	0.54222167797319	no	-	--	-	-	-	-
Unigene0000588	34.6666666666667	45	1.4792	1.0802	0.7437	0.9436	0.7423	1.4051	1.10103333333333	1.03033333333333	-0.0957469930900986	0.873178074376103	1	no	-	--	-	-	-	-
Unigene0000589	557	920.333333333333	4.9739	5.5182	5.8411	7.2782	8.1792	5.4454	5.4444	6.9676	0.355888737722499	0.32508648298217	0.999845213278851	no	Znf319	PREDICTED: zinc finger protein 319-like [Danio rerio]	-	-	-	-
Unigene0000590	20	29	1.2480	0.7733	1.5145	0.5616	2.4529	1.1669	1.1786	1.3938	0.241949388678357	0.73382283603421	1	no	-	--	-	-	-	-
Unigene0000591	15.3333333333333	20	1.0066	1.1515	0.9585	0.9649	0.9909	1.1102	1.03886666666667	1.022	-0.0236153071654054	0.999999999999999	1	no	-	--	-	-	-	-
Unigene0000592	1449.66666666667	1728	14.6167	16.0068	16.8580	10.9427	13.7727	18.5069	15.8271666666667	14.4074333333333	-0.13558966747787	0.697204394079159	1	no	spop	speckle-type POZ protein [Danio rerio]	-	GO:1902494//catalytic complex;GO:0005622//intracellular;GO:0043234//protein complex;GO:0005634//nucleus;GO:0043233//organelle lumen;GO:0043229//intracellular organelle;GO:0000151//ubiquitin ligase complex;GO:0070013//intracellular organelle lumen;GO:0044422//organelle part;GO:0044464//cell part;GO:0031974//membrane-enclosed lumen;GO:0043226//organelle;GO:0044446//intracellular organelle part;GO:0…	GO:0005515//protein binding;GO:0005488//binding;GO:0044389//ubiquitin-like protein ligase binding;GO:0019899//enzyme binding	GO:0036211//protein modification process;GO:0071704//organic substance metabolic process;GO:0048583//regulation of response to stimulus;GO:0033500//carbohydrate homeostasis;GO:0016567//protein ubiquitination;GO:0051603//proteolysis involved in cellular protein catabolic process;GO:0006464//cellular protein modification process;GO:0044248//cellular catabolic process;GO:0043067//regulation of progr…
Unigene0000593	208	66	23.6717	6.4925	12.9417	6.0447	1.5774	2.2255	14.3686333333333	3.28253333333333	-2.13004128044863	0.000577796536173103	0.100476789598656	no	-	--	-	-	-	-
Unigene0000594	218	317	2.8235	4.6550	4.1120	4.7255	5.1507	3.2247	3.8635	4.36696666666667	0.176723121024199	0.674447074938806	1	no	-	--	-	-	-	-
Unigene0000595	330.333333333333	317.333333333333	12.6819	13.9745	8.5956	7.0568	9.9367	8.3778	11.7506666666667	8.4571	-0.474507666682522	0.237051118589311	0.957878416370176	no	-	--	-	-	-	-
Unigene0000596	58.3333333333333	7.66666666666667	0.3596	0.8355	6.7202	0.1120	0.4511	0.3736	2.63843333333333	0.312233333333333	-3.07898506111507	0.00148565185924122	0.167142733476677	no	-	PREDICTED: polyglutamine-binding protein 1-like [Acanthisitta chloris]	-	-	-	-
Unigene0000597	19.6666666666667	63	1.2311	0.8239	0.5737	3.7738	0.8155	1.3506	0.876233333333333	1.97996666666667	1.17608913903475	0.0704398970242215	0.728197163437343	no	Tf2-9	PREDICTED: RNA-directed DNA polymerase homolog, partial [Danio rerio]	-	-	-	-
Unigene0000598	3440.33333333333	3277	79.8070	51.5449	40.5694	25.9520	34.9758	58.4696	57.3071	39.7991333333333	-0.525976876210779	0.179007422775384	0.917083428174444	no	dnaaf2	PREDICTED: protein kintoun isoform X2 [Sinocyclocheilus grahami]	-	-	-	-
Unigene0000599	31.3333333333333	25.3333333333333	3.3990	2.9618	2.4750	1.0589	0.8795	3.2445	2.94526666666667	1.72763333333333	-0.76960120506913	0.223021128213297	0.948877740094016	no	-	PREDICTED: serine/arginine repetitive matrix protein 2-like isoform X1 [Hippocampus comes]	-	-	-	-
Unigene0000600	23	5.66666666666667	4.3673	1.0745	2.4319	0.0000	1.1603	0.4004	2.62456666666667	0.520233333333333	-2.33484849761022	0.00985985288529944	0.390848657560195	no	-	--	-	-	-	-
Unigene0000601	36.3333333333333	60.3333333333333	3.2251	5.1683	2.4293	6.9291	2.8463	3.2583	3.60756666666667	4.34456666666667	0.268186232234138	0.630381463471539	1	no	-	PREDICTED: protein NLRC5-like, partial [Sinocyclocheilus grahami]	-	-	-	-
Unigene0000602	118	169.333333333333	5.7549	1.6232	4.7685	7.1466	2.8980	3.0184	4.04886666666667	4.35433333333333	0.104933718710773	0.856427316166842	1	no	-	PREDICTED: uncharacterized protein LOC107741621 [Sinocyclocheilus rhinocerous]	-	-	-	-
Unigene0000603	514.333333333333	702.666666666667	7.3010	4.8331	5.8392	9.5786	3.7641	4.7751	5.9911	6.03926666666667	0.011552462925531	0.979404706248886	1	no	-	PREDICTED: protein NLRC5-like, partial [Sinocyclocheilus grahami]	-	-	-	-
Unigene0000604	36.6666666666667	27.6666666666667	1.5033	0.9844	0.8707	0.5535	0.3858	0.8945	1.11946666666667	0.611266666666667	-0.872937769092234	0.124734651907084	0.85023446438704	no	-	--	-	-	-	-
Unigene0000605	86	90.6666666666667	2.0507	1.9296	1.7513	1.5932	1.3341	1.5940	1.91053333333333	1.5071	-0.342200282135018	0.451309765466915	1	no	MRAS	PREDICTED: ras-related protein M-Ras-like [Sinocyclocheilus anshuiensis]	ko04010//MAPK signaling pathway//Signal transduction//Environmental Information Processing;ko04810//Regulation of actin cytoskeleton//Cell motility//Cellular Processes;ko04530//Tight junction//Cellular commiunity//Cellular Processes	-	GO:0005488//binding;GO:0097367//carbohydrate derivative binding;GO:1901363//heterocyclic compound binding;GO:0032550//purine ribonucleoside binding;GO:0001883//purine nucleoside binding;GO:0001882//nucleoside binding;GO:0097159//organic cyclic compound binding;GO:0036094//small molecule binding;GO:0003824//catalytic activity;GO:0032549//ribonucleoside binding	GO:1901135//carbohydrate derivative metabolic process;GO:0044700//single organism signaling;GO:0019693//ribose phosphate metabolic process;GO:0034655//nucleobase-containing compound catabolic process;GO:0009056//catabolic process;GO:0055086//nucleobase-containing small molecule metabolic process;GO:1901575//organic substance catabolic process;GO:0046483//heterocycle metabolic process;GO:0072521//…
Unigene0000606	2065	3431.33333333333	11.2927	11.2789	12.3866	11.3716	17.3208	16.1665	11.6527333333333	14.9529666666667	0.359763341764145	0.27321281536694	0.983839344944986	no	SOS1	PREDICTED: son of sevenless homolog 1 isoform X1 [Pygocentrus nattereri]	ko04010//MAPK signaling pathway//Signal transduction//Environmental Information Processing;ko04510//Focal adhesion//Cellular commiunity//Cellular Processes;ko04810//Regulation of actin cytoskeleton//Cell motility//Cellular Processes;ko04068//FoxO signaling pathway//Signal transduction//Environmental Information Processing;ko04910//Insulin signaling pathway//Endocrine system//Organismal Systems;ko…	-	-	-
Unigene0000607	83.6666666666667	137.333333333333	2.0676	1.6198	2.6239	2.9629	2.9794	2.1543	2.10376666666667	2.69886666666667	0.359379003387539	0.431899141616257	1	no	hoxb7a	PREDICTED: homeobox protein Hox-B7a-like [Sinocyclocheilus anshuiensis]	-	GO:0043227//membrane-bounded organelle;GO:0043226//organelle;GO:0044464//cell part;GO:0005622//intracellular;GO:0005623//cell;GO:0043229//intracellular organelle;GO:0043231//intracellular membrane-bounded organelle;GO:0044424//intracellular part	GO:0001071//nucleic acid binding transcription factor activity;GO:0003676//nucleic acid binding;GO:1901363//heterocyclic compound binding;GO:0005488//binding;GO:0003677//DNA binding;GO:0097159//organic cyclic compound binding	GO:0006139//nucleobase-containing compound metabolic process;GO:0043170//macromolecule metabolic process;GO:0032774//RNA biosynthetic process;GO:0008152//metabolic process;GO:0044238//primary metabolic process;GO:0018130//heterocycle biosynthetic process;GO:0006725//cellular aromatic compound metabolic process;GO:0009059//macromolecule biosynthetic process;GO:0097659//nucleic acid-templated trans…
Unigene0000608	926.666666666667	719.333333333333	10.9530	9.2136	9.5795	6.7024	6.2920	4.5468	9.91536666666667	5.84706666666667	-0.761953083152559	0.033327942464747	0.58242540310803	no	ZNF34	PREDICTED: zinc finger protein 501-like isoform X2 [Sinocyclocheilus grahami]	-	-	GO:0097159//organic cyclic compound binding;GO:0043169//cation binding;GO:0005488//binding;GO:0043167//ion binding	-
Unigene0000609	65	58.6666666666667	2.3767	1.5868	1.7794	1.4391	1.3607	1.1060	1.9143	1.30193333333333	-0.556161363955085	0.253281381528759	0.968484466078137	no	-	--	-	-	-	-
Unigene0000610	68.3333333333333	63	1.3890	1.9623	1.5980	0.5712	1.4429	1.5065	1.64976666666667	1.17353333333333	-0.491403171451081	0.352798182488475	1	no	eif4e1b	PREDICTED: eukaryotic translation initiation factor 4E-1B-like isoform X2 [Cyprinus carpio]	ko03013//RNA transport//Translation//Genetic Information Processing;ko04910//Insulin signaling pathway//Endocrine system//Organismal Systems;ko04150//mTOR signaling pathway//Signal transduction//Environmental Information Processing	GO:0043231//intracellular membrane-bounded organelle;GO:0044424//intracellular part;GO:0034518//RNA cap binding complex;GO:0043229//intracellular organelle;GO:0043227//membrane-bounded organelle;GO:0005623//cell;GO:0043234//protein complex;GO:0044464//cell part;GO:0043226//organelle;GO:0005622//intracellular;GO:0032991//macromolecular complex	GO:1901363//heterocyclic compound binding;GO:0097159//organic cyclic compound binding;GO:0003723//RNA binding;GO:0005488//binding;GO:0003676//nucleic acid binding;GO:0008135//translation factor activity, RNA binding	GO:0044238//primary metabolic process;GO:0071704//organic substance metabolic process;GO:0044260//cellular macromolecule metabolic process;GO:0034645//cellular macromolecule biosynthetic process;GO:0044237//cellular metabolic process;GO:0006518//peptide metabolic process;GO:0044267//cellular protein metabolic process;GO:0006412//translation;GO:1901564//organonitrogen compound metabolic process;GO…
Unigene0000611	10.6666666666667	13	0.5774	0.5366	0.5045	0.5756	0.3477	0.5399	0.5395	0.487733333333333	-0.14553038534782	0.842295524308824	1	no	-	--	-	-	-	-
Unigene0000612	48.3333333333333	115	1.6236	7.9893	2.6426	7.6763	3.3071	10.1210	4.08516666666667	7.0348	0.784114469437393	0.218268147102567	0.94613017494041	no	-	--	-	-	-	-
Unigene0000613	223.666666666667	334	3.7561	3.6921	2.4930	6.4928	2.4146	1.8856	3.31373333333333	3.59766666666667	0.118604014300163	0.812242932689739	1	no	GIMAP7	PREDICTED: GTPase IMAP family member 7-like [Sinocyclocheilus rhinocerous]	-	-	GO:1901363//heterocyclic compound binding;GO:0097159//organic cyclic compound binding;GO:0032550//purine ribonucleoside binding;GO:0036094//small molecule binding;GO:0097367//carbohydrate derivative binding;GO:0005488//binding;GO:0001882//nucleoside binding;GO:0032549//ribonucleoside binding;GO:0001883//purine nucleoside binding	-
Unigene0000614	1281.33333333333	1832.33333333333	11.2284	11.8383	9.7844	10.2091	13.1326	12.2521	10.9503666666667	11.8646	0.115684284270425	0.729292073634269	1	no	gag-pol	PREDICTED: protein NYNRIN-like [Oreochromis niloticus]	-	-	-	-
Unigene0000615	1825.66666666667	2498.33333333333	13.2284	13.0635	9.2969	12.8849	11.8624	11.4507	11.8629333333333	12.066	0.0244867000045251	0.941212033217222	1	no	pol	PREDICTED: protein NYNRIN-like [Oreochromis niloticus]	-	-	-	-
Unigene0000616	337.666666666667	361	9.3434	8.8531	8.5649	6.6693	7.3293	7.6716	8.92046666666667	7.2234	-0.304441122817452	0.416508626512017	1	no	CRYBA2	PREDICTED: beta-crystallin A2-like [Sinocyclocheilus rhinocerous]	-	-	-	-
Unigene0000617	34.3333333333333	57.3333333333333	3.1069	3.2488	4.9017	3.9523	4.1903	6.4559	3.75246666666667	4.86616666666667	0.374946477186853	0.47376588876036	1	no	-	PREDICTED: zinc finger protein ZFP69-like isoform X1 [Ictalurus punctatus]	-	-	-	-
Unigene0000618	0.666666666666667	0	0.0000	0.1817	0.0000	0.0000	0.0000	0.0000	0.0605666666666667	0.001	-5.9204521086256	0.553332262527251	1	no	-	--	-	-	-	-
Unigene0000619	17	23	0.9671	0.9589	0.9390	0.7633	1.1648	1.0450	0.955	0.991033333333333	0.0534328500211347	0.964827145059021	1	no	-	--	-	-	-	-
Unigene0000620	0	0	0.0000	0.0000	0.0000	0.0000	0.0000	0.0000	0.001	0.001	0	notest	notest	notest	-	--	-	-	-	-
Unigene0000621	159.333333333333	165.666666666667	4.3154	3.3462	2.5347	2.1094	1.9922	3.6264	3.39876666666667	2.576	-0.399878727415644	0.381562600809543	1	no	-	PREDICTED: L-rhamnose-binding lectin CSL2-like [Sinocyclocheilus rhinocerous]	-	-	-	-
Unigene0000622	136	227.666666666667	2.1522	2.7385	2.4953	3.2939	3.4762	2.7224	2.462	3.16416666666667	0.361994831300839	0.381982576633064	1	no	SLC25A15	PREDICTED: mitochondrial ornithine transporter 1-like [Sinocyclocheilus grahami]	-	GO:0044425//membrane part;GO:0031224//intrinsic component of membrane;GO:0016020//membrane	-	-
Unigene0000623	135.666666666667	198.666666666667	4.2404	3.6078	3.7527	3.6379	5.2791	4.1073	3.86696666666667	4.34143333333333	0.166969101699115	0.694635181034188	1	no	-	--	-	-	-	-
Unigene0000624	13.3333333333333	20	0.9469	0.7041	1.5168	1.0029	1.6394	1.1805	1.05593333333333	1.27426666666667	0.271148470389625	0.694768736467948	1	no	-	--	-	-	-	-
Unigene0000625	86.3333333333333	89.3333333333333	4.2819	2.2387	3.5401	2.1677	1.8131	3.7814	3.35356666666667	2.5874	-0.374193176947661	0.462574435087707	1	no	-	--	-	-	-	-
Unigene0000626	718.333333333333	1018.66666666667	6.0595	6.3169	6.9206	6.5359	6.8264	7.5740	6.43233333333333	6.97876666666667	0.117629925335464	0.733636270397629	1	no	ATF7	PREDICTED: cyclic AMP-dependent transcription factor ATF-7-like isoform X2 [Sinocyclocheilus grahami]	-	-	GO:0097159//organic cyclic compound binding;GO:1901363//heterocyclic compound binding;GO:0003676//nucleic acid binding;GO:0005488//binding;GO:0001071//nucleic acid binding transcription factor activity;GO:0003677//DNA binding	GO:0097659//nucleic acid-templated transcription;GO:0006139//nucleobase-containing compound metabolic process;GO:0008152//metabolic process;GO:0016070//RNA metabolic process;GO:0009058//biosynthetic process;GO:0009987//cellular process;GO:0034645//cellular macromolecule biosynthetic process;GO:1901360//organic cyclic compound metabolic process;GO:0044238//primary metabolic process;GO:0019438//aro…
Unigene0000627	273.666666666667	342	3.5610	4.3402	4.0484	4.5002	3.9070	3.0051	3.9832	3.8041	-0.0663727490794707	0.86820207595103	1	no	plekha8	PREDICTED: pleckstrin homology domain-containing family A member 8 isoform X1 [Sinocyclocheilus rhinocerous]	-	GO:0043231//intracellular membrane-bounded organelle;GO:0043226//organelle;GO:0005623//cell;GO:0044424//intracellular part;GO:0043227//membrane-bounded organelle;GO:0044464//cell part;GO:0005622//intracellular;GO:0043229//intracellular organelle	GO:0005319//lipid transporter activity;GO:0005215//transporter activity;GO:0022892//substrate-specific transporter activity;GO:0008289//lipid binding;GO:0005488//binding	GO:0051234//establishment of localization;GO:0008104//protein localization;GO:0051179//localization;GO:0033036//macromolecule localization;GO:0045184//establishment of protein localization
Unigene0000628	51.3333333333333	59.3333333333333	2.5106	2.7484	2.2750	0.9386	1.9319	3.6518	2.51133333333333	2.1741	-0.208035232407699	0.717479711697647	1	no	-	--	-	-	-	-
Unigene0000629	19.6666666666667	22.3333333333333	1.5728	2.7149	1.5542	0.8399	1.9450	2.2409	1.9473	1.67526666666667	-0.21708440192791	0.76318574489801	1	no	-	--	-	-	-	-
Unigene0000630	62.3333333333333	38.6666666666667	2.3777	1.6370	0.9832	0.7864	0.8397	0.6404	1.66596666666667	0.7555	-1.14085587446495	0.0311294106319435	0.569736415489396	no	Myt1l	PREDICTED: myelin transcription factor 1-like protein [Sinocyclocheilus anshuiensis]	-	-	-	-
Unigene0000631	72.6666666666667	15	2.0748	1.9545	1.4087	0.0000	0.9498	0.0000	1.81266666666667	0.3166	-2.51738049005379	0.0293454082537143	0.560572568788529	no	-	PREDICTED: sterile alpha motif domain-containing protein 3-like [Danio rerio]	-	-	-	-
Unigene0000632	6.66666666666667	80.3333333333333	0.0000	0.0000	1.3634	11.0242	2.5370	0.9337	0.454466666666667	4.83163333333333	3.41026458704347	0.00414203548820194	0.274917675992275	no	-	--	-	-	-	-
Unigene0000633	2764.66666666667	2064	96.9663	68.0340	56.8953	26.0579	26.3215	67.6867	73.9652	40.0220333333333	-0.886052188846443	0.0368846728910632	0.599710124469059	no	stpg1	PREDICTED: O(6)-methylguanine-induced apoptosis 2-like [Sinocyclocheilus anshuiensis]	-	-	-	-
Unigene0000634	36.6666666666667	59.3333333333333	1.5047	1.2937	0.9039	1.2891	1.5857	1.5711	1.2341	1.48196666666667	0.26405369616931	0.60364681028805	1	no	-	--	-	-	-	-
Unigene0000635	63.6666666666667	79.3333333333333	3.2711	3.7881	2.1086	3.6753	3.0679	1.7383	3.05593333333333	2.82716666666667	-0.112256135427409	0.830972029741561	1	no	-	--	-	-	-	-
Unigene0000636	20	16.3333333333333	1.8026	0.4296	0.3702	0.4608	0.0348	0.9220	0.867466666666667	0.472533333333333	-0.876392218486115	0.342303342179594	1	no	-	reverse transcriptase [Danio rerio]	-	-	-	-
Unigene0000637	418	586.333333333333	12.2622	10.2222	9.9138	11.2495	11.7983	11.2184	10.7994	11.4220666666667	0.0808725498074375	0.824431908328349	1	no	X-element\ORF2	reverse transcriptase [Danio rerio]	-	-	-	-
Unigene0000638	2102	1046	20.7345	9.0894	6.3637	2.3813	3.6502	6.7711	12.0625333333333	4.26753333333333	-1.49905860192155	0.00233895337941004	0.213287896748761	no	prmt8b	PREDICTED: ras and EF-hand domain-containing protein homolog [Sinocyclocheilus anshuiensis]	-	GO:0044464//cell part;GO:0016020//membrane;GO:0005622//intracellular;GO:0044424//intracellular part;GO:0005623//cell	GO:0016741//transferase activity, transferring one-carbon groups;GO:0003824//catalytic activity;GO:0016273//arginine N-methyltransferase activity;GO:0016274//protein-arginine N-methyltransferase activity;GO:0008168//methyltransferase activity;GO:0016740//transferase activity;GO:0008276//protein methyltransferase activity;GO:0008757//S-adenosylmethionine-dependent methyltransferase activity;GO:000…	GO:0036211//protein modification process;GO:0044699//single-organism process;GO:0035247//peptidyl-arginine omega-N-methylation;GO:0030182//neuron differentiation;GO:0044237//cellular metabolic process;GO:0048699//generation of neurons;GO:0022008//neurogenesis;GO:0019538//protein metabolic process;GO:0048731//system development;GO:0043414//macromolecule methylation;GO:0032501//multicellular organi…
Unigene0000639	1055	1837.66666666667	10.4927	15.2244	4.8340	13.4777	11.8518	13.0883	10.1837	12.8059333333333	0.330550579686376	0.425466695120409	1	no	-	PREDICTED: uncharacterized protein LOC103912045 isoform X1 [Danio rerio]	-	-	-	-
Unigene0000640	8.33333333333333	11.6666666666667	1.1771	0.5050	0.3956	0.5642	1.0224	0.5644	0.692566666666667	0.717	0.0500201668410174	0.999999999999993	1	no	-	--	-	-	-	-
Unigene0000641	8	5.33333333333333	1.1952	0.2020	0.8703	0.1354	0.2454	0.7451	0.755833333333333	0.3753	-1.01002385469511	0.33729943185848	1	no	-	--	-	-	-	-
Unigene0000642	134.666666666667	110	3.4634	2.0723	2.2224	1.2138	0.7821	2.5908	2.58603333333333	1.5289	-0.7582468231028	0.147543901120659	0.881696731265193	no	-	hypothetical protein cypCar_00008992 [Cyprinus carpio]	-	-	-	-
Unigene0000643	114.333333333333	57	3.3961	3.5035	4.1034	2.2555	1.5170	0.4653	3.66766666666667	1.4126	-1.37650952494131	0.0143145946920333	0.440082958133501	no	-	--	-	-	-	-
Unigene0000644	128.333333333333	100.333333333333	14.9921	15.8905	13.5021	12.2908	7.7216	5.9845	14.7949	8.66563333333333	-0.77172284662747	0.0954956767548118	0.78994249888302	no	-	--	-	-	-	-
Unigene0000645	18.6666666666667	21	1.5145	1.4077	1.4271	0.6661	1.1400	1.8882	1.44976666666667	1.23143333333333	-0.235482197623059	0.711318562862538	1	no	-	--	-	-	-	-
Unigene0000646	18	17.3333333333333	0.9362	1.2182	0.8180	0.8166	0.8457	0.5058	0.9908	0.7227	-0.455196974286736	0.453821687137594	1	no	-	--	-	-	-	-
Unigene0000647	28.3333333333333	65	0.3452	0.3949	1.0828	1.1747	0.6597	1.5064	0.607633333333333	1.1136	0.873958196324222	0.148155675482356	0.882543226106695	no	-	PREDICTED: microfibril-associated glycoprotein 4-like, partial [Sinocyclocheilus rhinocerous]	-	-	-	-
Unigene0000648	76	102.666666666667	3.5396	2.0962	0.9808	2.3030	1.1554	2.7532	2.20553333333333	2.07053333333333	-0.0911251360550268	0.88500102564135	1	no	-	--	-	-	-	-
Unigene0000649	125	129	11.5528	7.4461	8.7807	6.0422	8.0617	7.6222	9.25986666666667	7.24203333333333	-0.354596602982417	0.420711274569011	1	no	-	--	-	-	-	-
Unigene0000650	82.3333333333333	59.3333333333333	5.5803	3.4402	3.4829	3.7607	0.5572	2.0943	4.1678	2.1374	-0.96342912483136	0.119660309179583	0.8407331442315	no	-	--	-	-	-	-
Unigene0000651	20	23.6666666666667	1.3406	0.8473	0.7029	1.1360	0.7266	0.6351	0.9636	0.832566666666667	-0.210868594883702	0.759749719308473	1	no	-	--	-	-	-	-
Unigene0000652	146.666666666667	219	2.6571	1.5055	2.7166	3.5378	2.6577	1.7131	2.29306666666667	2.6362	0.201181527907444	0.66544306136784	1	no	BTN3A2	PREDICTED: butyrophilin subfamily 1 member A1-like [Sinocyclocheilus grahami]	ko04514//Cell adhesion molecules (CAMs)//Signaling molecules and interaction//Environmental Information Processing	-	-	-
Unigene0000653	1390.33333333333	1394.66666666667	11.9189	9.9578	9.4882	9.5891	6.6422	7.2060	10.4549666666667	7.81243333333333	-0.420344583498404	0.223290715453079	0.949510294641844	no	Tmem65	PREDICTED: transmembrane protein 65 isoform X2 [Sinocyclocheilus anshuiensis]	-	-	-	-
Unigene0000654	52	66.3333333333333	0.6666	0.4607	1.0952	1.0117	0.7977	0.4475	0.740833333333333	0.7523	0.0221590771440756	0.987541148589489	1	no	TY3B-I	PREDICTED: protein turtle homolog B-like [Sinocyclocheilus anshuiensis]	-	-	-	-
Unigene0000655	320.333333333333	199.333333333333	7.5339	4.0034	1.7352	3.5598	1.4930	0.7197	4.42416666666667	1.92416666666667	-1.20117196834961	0.051801739871297	0.662932254522645	no	-	PREDICTED: SLAM family member 5-like [Sinocyclocheilus anshuiensis]	-	-	-	-
Unigene0000656	5.66666666666667	8.33333333333333	0.5389	0.0835	0.6540	0.2238	0.3380	0.8958	0.425466666666667	0.485866666666667	0.191514350522739	0.935135858721337	1	no	-	--	-	-	-	-
Unigene0000657	165.666666666667	153.333333333333	4.1989	3.1956	4.6375	3.4765	2.8002	2.2837	4.01066666666667	2.85346666666667	-0.491126356308094	0.254768466833396	0.970189291722167	no	-	--	-	-	-	-
Unigene0000658	1334.33333333333	2475	12.2697	2.9103	16.2753	18.6448	12.9633	14.2624	10.4851	15.2901666666667	0.544263511545394	0.271120237249279	0.98281593110894	no	set-1	PREDICTED: uncharacterized protein LOC103911548 [Danio rerio]	-	-	-	-
Unigene0000659	1694.66666666667	1409.66666666667	42.4712	24.4431	29.3326	20.7288	25.3505	14.8155	32.0823	20.2982666666667	-0.660421036835816	0.0753850588913805	0.744204741932593	no	-	PREDICTED: probable GPI-anchored adhesin-like protein PGA55 isoform X1 [Stegastes partitus]	-	-	-	-
Unigene0000660	56.3333333333333	60.3333333333333	1.5038	1.2095	1.5161	1.9099	1.1102	0.4326	1.4098	1.1509	-0.292728025239053	0.607507866839788	1	no	-	--	-	-	-	-
Unigene0000661	63.6666666666667	28	3.0128	2.0393	0.7631	0.9182	0.3451	0.5103	1.9384	0.5912	-1.7131481353052	0.00675415764674233	0.342305182712363	no	-	--	-	-	-	-
Unigene0000662	457.666666666667	719.333333333333	3.7519	4.0415	4.3787	4.2271	5.0219	5.4402	4.05736666666667	4.8964	0.271177734803413	0.450997136096442	1	no	Gtpbp2	PREDICTED: GTP-binding protein 2-like [Sinocyclocheilus rhinocerous]	-	-	GO:0032550//purine ribonucleoside binding;GO:0036094//small molecule binding;GO:0032549//ribonucleoside binding;GO:0005488//binding;GO:0097367//carbohydrate derivative binding;GO:0001883//purine nucleoside binding;GO:0097159//organic cyclic compound binding;GO:1901363//heterocyclic compound binding;GO:0001882//nucleoside binding	-
Unigene0000663	1334	1924	10.8061	8.3285	11.5886	10.6048	11.9533	11.5716	10.2410666666667	11.3765666666667	0.151699244239848	0.651277663636042	1	no	pol	PREDICTED: myosin-IIIa-like [Sinocyclocheilus rhinocerous]	-	-	-	-
Unigene0000664	139.666666666667	274.666666666667	10.2947	7.3403	8.2663	11.7302	13.4819	13.3183	8.63376666666667	12.8434666666667	0.572972653929263	0.163046971149013	0.89860411252996	no	-	PREDICTED: receptor-type tyrosine-protein phosphatase mu-like [Sinocyclocheilus grahami]	-	-	-	-
Unigene0000665	0.666666666666667	0.333333333333333	0.1578	0.0000	0.1149	0.0000	0.1188	0.0000	0.0909	0.0396	-1.1987798641145	0.999999999999988	1	no	-	PREDICTED: receptor-type tyrosine-protein phosphatase mu-like [Sinocyclocheilus grahami]	-	-	-	-
Unigene0000666	19	19.6666666666667	1.7939	1.1409	1.7188	1.4707	1.4215	0.8240	1.5512	1.23873333333333	-0.324519061905709	0.574267164933236	1	no	-	--	-	-	-	-
Unigene0000667	7	16.3333333333333	0.1744	0.0000	1.2066	0.7607	1.1160	0.9786	0.460333333333333	0.951766666666667	1.04792901470472	0.283446938597627	0.987021953743811	no	-	--	-	-	-	-
Unigene0000668	517.333333333333	735.666666666667	10.5910	8.3646	8.7967	12.1171	9.0171	8.4848	9.25076666666667	9.873	0.093915591785433	0.798165472380938	1	no	RLN3	PREDICTED: relaxin-3-like [Sinocyclocheilus grahami]	-	-	-	-
Unigene0000669	198.666666666667	226	9.0551	9.6761	12.5591	13.5866	7.6046	6.1439	10.4301	9.1117	-0.194960837321132	0.662501133443439	1	no	-	--	-	-	-	-
Unigene0000670	2916.66666666667	3251.66666666667	12.1975	9.3694	10.8661	9.5733	7.8633	9.7635	10.811	9.0667	-0.253850521430124	0.424965440885141	1	no	RNF212B	PREDICTED: homeobox and leucine zipper protein Homez-like [Sinocyclocheilus anshuiensis]	-	-	-	-
Unigene0000671	19.6666666666667	20.6666666666667	0.2280	0.8478	0.8025	0.9235	0.4863	0.1421	0.6261	0.5173	-0.275391909677236	0.713859122657059	1	no	-	--	-	-	-	-
Unigene0000672	35.6666666666667	37	0.4206	1.3551	0.8166	1.0132	0.7176	0.3321	0.8641	0.687633333333333	-0.329558799520711	0.59894730377105	1	no	-	--	-	-	-	-
Unigene0000673	35	80.3333333333333	1.9403	2.2363	2.7692	4.4005	4.3233	3.6770	2.31526666666667	4.1336	0.836220419786766	0.085813389121525	0.76618495019339	no	-	--	-	-	-	-
Unigene0000674	265.666666666667	444.666666666667	4.7253	8.2376	2.2939	13.4517	1.6125	2.6707	5.0856	5.91163333333333	0.217138796138688	0.750325723560352	1	no	-	Mucin-12, partial [Columba livia]	-	-	-	-
Unigene0000675	3144	3174.33333333333	35.1084	30.7814	30.7764	21.2909	21.2432	30.6485	32.2220666666667	24.3942	-0.401510857617261	0.215530297510591	0.943285434398494	no	MAD1L1	mitotic spindle assembly checkpoint protein MAD1 [Danio rerio]	ko04110//Cell cycle//Cell growth and death//Cellular Processes;ko04914//Progesterone-mediated oocyte maturation//Endocrine system//Organismal Systems	-	-	-
Unigene0000676	36	38	1.4895	2.5381	1.8076	1.8561	2.1957	0.7350	1.94506666666667	1.5956	-0.285720575527795	0.630680718102526	1	no	-	--	-	-	-	-
Unigene0000677	6.33333333333333	13	1.0111	0.0000	0.8180	1.3299	0.6765	0.8404	0.6097	0.948933333333333	0.638207189252179	0.485645776312844	1	no	-	--	-	-	-	-
Unigene0000678	516	771.666666666667	9.2134	7.3379	7.1005	8.8757	7.0400	10.3294	7.88393333333333	8.74836666666667	0.150098111752005	0.681932685570588	1	no	-	--	-	-	-	-
Unigene0000679	325	352.666666666667	8.7963	8.1760	7.0783	5.0094	7.0855	7.5964	8.01686666666667	6.56376666666667	-0.288514526265935	0.460539187115336	1	no	-	TPA_exp: polyprotein [Danio rerio]	-	-	-	-
Unigene0000680	2015.66666666667	2679.33333333333	62.9402	51.3693	59.5580	51.4978	62.4917	62.4504	57.9558333333333	58.8133	0.0211885642846817	0.948070244838733	1	no	PQBP1	PREDICTED: polyglutamine-binding protein 1-like [Sinocyclocheilus anshuiensis]	ko03040//Spliceosome//Transcription//Genetic Information Processing	-	-	-
Unigene0000681	12977	9871.66666666667	230.0041	167.9564	153.2586	60.1961	85.9988	163.1214	183.7397	103.105433333333	-0.833543018027772	0.0325377140345445	0.57903427536793	no	tacc3	PREDICTED: transforming acidic coiled-coil-containing protein 3-like isoform X1 [Sinocyclocheilus rhinocerous]	ko03013//RNA transport//Translation//Genetic Information Processing	-	-	-
Unigene0000682	35.3333333333333	18	7.3645	2.9947	4.1336	1.9119	1.2704	2.1998	4.83093333333333	1.79403333333333	-1.42909524784344	0.0173602032128531	0.471297158134933	no	-	--	-	-	-	-
Unigene0000683	9381.66666666667	15432	404.5317	426.8144	493.6779	528.4334	650.2680	513.6682	441.674666666667	564.1232	0.3530261846647	0.249816950671515	0.965559578606373	no	rps27	40S ribosomal protein S27, partial [Scophthalmus maximus]	ko03010//Ribosome//Translation//Genetic Information Processing	GO:0044464//cell part;GO:0030529//intracellular ribonucleoprotein complex;GO:0005623//cell;GO:0005622//intracellular;GO:0044424//intracellular part;GO:0032991//macromolecular complex;GO:1990904//ribonucleoprotein complex	GO:0043167//ion binding;GO:0005198//structural molecule activity;GO:0043169//cation binding;GO:0005488//binding	GO:0071704//organic substance metabolic process;GO:0008152//metabolic process;GO:0010467//gene expression;GO:0043170//macromolecule metabolic process
Unigene0000684	423.333333333333	427.333333333333	75.2818	46.9019	34.5586	34.4993	50.6124	32.5609	52.2474333333333	39.2242	-0.413616143320057	0.324810751298186	0.999845213278851	no	LIAT1	Zgc:64189 [Danio rerio]	-	-	-	-
Unigene0000685	102	94.3333333333333	2.1532	0.8126	1.4029	0.6960	0.6337	1.6349	1.45623333333333	0.9882	-0.559366577243139	0.311737657147872	0.996829675044774	no	-	--	-	-	-	-
Unigene0000686	67.3333333333333	158.333333333333	2.3121	1.4685	2.8340	3.0012	6.0047	3.4351	2.20486666666667	4.147	0.911376631894126	0.0643167128756766	0.710260370395791	no	-	--	-	-	-	-
Unigene0000687	1335	1566.33333333333	10.8002	11.3603	11.2576	10.2195	9.6128	9.9610	11.1393666666667	9.9311	-0.165641780806193	0.614612296521282	1	no	CLINT1	PREDICTED: clathrin interactor 1-like isoform X1 [Cyprinus carpio]	ko04144//Endocytosis//Transport and catabolism//Cellular Processes	-	-	-
Unigene0000688	5.33333333333333	0.666666666666667	0.2338	0.3260	0.2554	0.0000	0.0000	0.0729	0.271733333333333	0.0243	-3.48316333183887	0.00317088915198602	0.246996743159274	no	-	unnamed protein product [Oncorhynchus mykiss]	-	-	-	-
Unigene0000689	40.3333333333333	22.6666666666667	1.7051	1.2598	1.6236	0.7900	0.8228	0.3816	1.5295	0.6648	-1.20206781967522	0.0283985641276962	0.553783430016825	no	-	PREDICTED: uncharacterized protein LOC107727458 [Sinocyclocheilus rhinocerous]	-	-	-	-
Unigene0000690	0.333333333333333	9.66666666666667	0.0000	0.1120	0.0000	1.2014	0.9979	0.1502	0.0373333333333333	0.783166666666667	4.39078313034351	0.00210577482665611	0.200844491931382	no	-	--	-	-	-	-
Unigene0000691	3.33333333333333	6	0.0714	0.5311	0.0520	0.2670	0.4301	0.1781	0.218166666666667	0.291733333333333	0.41921954595995	0.754009222824936	1	no	-	--	-	-	-	-
Unigene0000692	74	80	3.0742	1.7898	1.8203	1.8733	1.5767	1.8742	2.2281	1.77473333333333	-0.328211718726488	0.492850583946766	1	no	-	PREDICTED: HIRA-interacting protein 3-like isoform X3 [Sinocyclocheilus grahami]	-	-	-	-
Unigene0000693	22	15	1.0781	0.8278	0.8192	0.9346	0.3176	0.1169	0.908366666666667	0.456366666666667	-0.99308134597899	0.171357148944632	0.907529243816212	no	-	PREDICTED: putative nuclease HARBI1 [Cyprinus carpio]	-	-	-	-
Unigene0000694	24.6666666666667	11.6666666666667	1.6861	1.3510	0.8467	0.6158	0.3501	0.3624	1.2946	0.442766666666667	-1.54788788980477	0.0141254773303889	0.438534793430306	no	-	--	-	-	-	-
Unigene0000695	3371.66666666667	5973.33333333333	22.9043	38.8466	24.8285	48.4783	35.8947	30.8815	28.8598	38.4181666666667	0.41272737263917	0.231769575793284	0.954132981389424	no	CANX	calnexin 2 [Cyprinus carpio]	ko04141//Protein processing in endoplasmic reticulum//Folding, sorting and degradation//Genetic Information Processing;ko04145//Phagosome//Transport and catabolism//Cellular Processes	GO:0005622//intracellular;GO:0043231//intracellular membrane-bounded organelle;GO:0043229//intracellular organelle;GO:0044424//intracellular part;GO:0043227//membrane-bounded organelle;GO:0044464//cell part;GO:0043226//organelle;GO:0005623//cell	GO:0003824//catalytic activity;GO:0004197//cysteine-type endopeptidase activity;GO:0016787//hydrolase activity;GO:0008234//cysteine-type peptidase activity;GO:0005488//binding;GO:0070011//peptidase activity, acting on L-amino acid peptides;GO:0008233//peptidase activity;GO:0004175//endopeptidase activity;GO:0005515//protein binding	GO:0044238//primary metabolic process;GO:0008152//metabolic process;GO:0044237//cellular metabolic process;GO:0044260//cellular macromolecule metabolic process;GO:0043170//macromolecule metabolic process;GO:0051604//protein maturation;GO:0019538//protein metabolic process;GO:0016485//protein processing;GO:0071704//organic substance metabolic process;GO:0010467//gene expression;GO:0006508//proteol…
Unigene0000696	71.6666666666667	267.666666666667	0.5531	1.7279	0.6489	5.8586	0.7286	1.2259	0.976633333333333	2.60436666666667	1.41504365431811	0.0474261544063462	0.644130675664919	no	SLC25A29	PREDICTED: mitochondrial basic amino acids transporter-like isoform X1 [Cyprinus carpio]	-	-	-	-
Unigene0000697	1.33333333333333	76	0.0434	0.1211	0.0000	2.6792	0.1308	3.3845	0.0548333333333333	2.06483333333333	5.23482834831579	3.62681744457578e-06	0.00283429933588041	yes	-	vacuolar protein sorting 52 [Salmo salar]	-	-	-	-
Unigene0000698	274.333333333333	422	2.8531	2.9097	3.5586	3.1026	3.8280	4.1499	3.10713333333333	3.6935	0.249404425920655	0.51832711135973	1	no	-	--	-	-	-	-
Unigene0000699	21	30.6666666666667	2.7141	0.6639	0.7801	1.2015	0.6452	2.3597	1.38603333333333	1.40213333333333	0.0166615924391064	1	1	no	-	--	-	-	-	-
Unigene0000700	301	376.333333333333	8.4620	7.6936	8.0438	5.3299	8.4083	9.3607	8.06646666666667	7.69963333333333	-0.0671471275161878	0.868080356758219	1	no	STK19	PREDICTED: serine/threonine-protein kinase 19 isoform X2 [Sinocyclocheilus grahami]	-	-	-	-
Unigene0000701	6	15	0.8620	0.3561	0.3487	1.1339	0.5047	1.1344	0.522266666666667	0.924333333333333	0.823626582976093	0.26214169397728	0.977269839747205	no	-	--	-	-	-	-
Unigene0000702	103.666666666667	231	1.5920	1.3137	1.4905	2.9556	2.5681	1.9342	1.4654	2.48596666666667	0.762512431208978	0.072998488045148	0.735124798170707	no	pol	PREDICTED: uncharacterized protein LOC108184914 [Danio rerio]	-	-	-	-
Unigene0000703	21	46.3333333333333	0.6489	0.9047	0.9450	2.1659	0.9769	1.0402	0.832866666666667	1.39433333333333	0.743418038616551	0.192999872563537	0.92825390365778	no	PEG10	Retrotransposable element Tf2 protein type 1 [Larimichthys crocea]	ko03410//Base excision repair//Replication and repair//Genetic Information Processing	-	-	-
Unigene0000704	5.33333333333333	16	0.3809	0.7081	0.2774	1.5427	0.9319	0.5343	0.455466666666667	1.00296666666667	1.13885627980678	0.135313728860935	0.86652167257207	no	-	--	-	-	-	-
Unigene0000705	617.666666666667	338	13.2079	7.3402	7.8973	1.8049	2.4791	7.0403	9.4818	3.77476666666667	-1.32877349408072	0.00951105145713681	0.385621746149258	no	efhc2	PREDICTED: EF-hand domain-containing family member C2-like isoform X1 [Sinocyclocheilus rhinocerous]	-	-	GO:0046872//metal ion binding;GO:0005488//binding;GO:0043169//cation binding;GO:0043167//ion binding	-
Unigene0000706	161.333333333333	253.333333333333	1.8993	2.2740	2.5081	3.0888	2.5444	2.4281	2.22713333333333	2.6871	0.270862080482941	0.510146813106561	1	no	-	--	-	-	-	-
Unigene0000707	33.3333333333333	58	0.8894	1.0423	1.3516	1.7830	0.7860	1.7597	1.09443333333333	1.4429	0.39878724109618	0.473305459903807	1	no	-	--	-	-	-	-
Unigene0000708	18.3333333333333	27.6666666666667	1.5933	1.8758	1.6242	1.6545	2.1589	2.0526	1.69776666666667	1.95533333333333	0.203776375307363	0.749629557231133	1	no	-	--	-	-	-	-
Unigene0000709	57.6666666666667	52	1.8102	0.9060	2.3574	1.1929	1.3102	1.1067	1.6912	1.20326666666667	-0.491090875359181	0.352301699524902	1	no	-	--	-	-	-	-
Unigene0000710	43.3333333333333	55.6666666666667	1.2250	0.8924	1.5429	0.5982	1.2710	1.7955	1.2201	1.22156666666667	0.00173320380707253	1	1	no	-	PREDICTED: protein MAATS1 isoform X1 [Danio rerio]	-	-	GO:0097159//organic cyclic compound binding;GO:0005488//binding	GO:1901360//organic cyclic compound metabolic process;GO:0008152//metabolic process;GO:0006259//DNA metabolic process;GO:0044260//cellular macromolecule metabolic process;GO:0034641//cellular nitrogen compound metabolic process;GO:0071704//organic substance metabolic process;GO:0043170//macromolecule metabolic process;GO:0009987//cellular process;GO:0006725//cellular aromatic compound metabolic p…
Unigene0000711	18	11	3.5792	1.6018	1.3514	0.8259	0.7983	1.2395	2.17746666666667	0.954566666666667	-1.18973277009615	0.0788625834929835	0.752190431866745	no	-	--	-	-	-	-
Unigene0000712	2708.33333333333	3846	52.9795	63.6086	59.7906	39.9081	72.9927	79.7930	58.7929	64.2312666666667	0.127633805686466	0.714860342956503	1	no	sap30l	PREDICTED: histone deacetylase complex subunit SAP30L [Cyprinus carpio]	-	GO:0043226//organelle;GO:0043231//intracellular membrane-bounded organelle;GO:0044424//intracellular part;GO:0005623//cell;GO:0043227//membrane-bounded organelle;GO:0043229//intracellular organelle;GO:0044464//cell part;GO:0005622//intracellular	GO:0043169//cation binding;GO:0005488//binding;GO:0043167//ion binding	GO:0018130//heterocycle biosynthetic process;GO:0044260//cellular macromolecule metabolic process;GO:0006807//nitrogen compound metabolic process;GO:0044237//cellular metabolic process;GO:1901576//organic substance biosynthetic process;GO:0016070//RNA metabolic process;GO:0044271//cellular nitrogen compound biosynthetic process;GO:0044238//primary metabolic process;GO:0046483//heterocycle metabol…
Unigene0000713	13	17.6666666666667	0.9206	2.0322	1.0055	1.5056	0.9528	1.5064	1.31943333333333	1.3216	0.00236713404338904	1	1	no	-	PREDICTED: zinc finger BED domain-containing protein 5-like [Larimichthys crocea]	-	-	-	-
Unigene0000714	40.3333333333333	36.3333333333333	1.5014	1.1232	1.2532	1.0267	0.7994	0.7990	1.2926	0.875033333333333	-0.562866015906631	0.276999288253892	0.984102981257738	no	-	--	-	-	-	-
Unigene0000715	116	117.666666666667	2.2503	1.7683	2.1599	1.8099	1.6015	1.3645	2.0595	1.59196666666667	-0.371483997823447	0.399909196772266	1	no	-	--	-	-	-	-
Unigene0000716	24.3333333333333	28.6666666666667	0.3959	0.9462	1.9766	0.6695	0.5960	1.8685	1.10623333333333	1.04466666666667	-0.082613040424048	0.93369245011107	1	no	-	--	-	-	-	-
Unigene0000717	43.3333333333333	87	0.9703	1.4222	1.7120	2.2555	2.0508	2.1171	1.36816666666667	2.14113333333333	0.646130652026187	0.186917737179881	0.924384905437398	no	-	PREDICTED: muscle M-line assembly protein unc-89-like [Sinocyclocheilus rhinocerous]	-	-	-	-
Unigene0000718	68.6666666666667	63.6666666666667	1.1204	1.0877	2.0669	0.7757	1.6306	0.8381	1.425	1.08146666666667	-0.397972720529318	0.449700833549885	1	no	-	--	-	-	-	-
Unigene0000719	498.333333333333	725.666666666667	4.5764	3.8235	3.0016	4.3785	3.4385	4.4021	3.8005	4.07303333333333	0.0999143869108101	0.787153190589837	1	no	-	PREDICTED: uncharacterized protein LOC107591874 [Sinocyclocheilus grahami]	-	-	-	-
Unigene0000720	415.333333333333	425	16.0499	13.9135	13.7270	8.8031	12.9555	12.2755	14.5634666666667	11.3447	-0.360335354678418	0.3406009916963	1	no	-	--	-	-	-	-
Unigene0000721	146.666666666667	215.333333333333	1.8859	2.7399	2.3465	3.2969	1.9709	2.4425	2.3241	2.5701	0.145152348814092	0.738952665621691	1	no	PEG10	Retrotransposable element Tf2 protein type 1 [Larimichthys crocea]	-	-	-	-
Unigene0000722	35.6666666666667	24.3333333333333	1.6143	3.9718	3.1115	1.3016	3.1452	0.4144	2.8992	1.6204	-0.839304870359798	0.23185586369549	0.954132981389424	no	-	--	-	-	-	-
Unigene0000723	286.666666666667	309.333333333333	20.0005	13.0778	11.6000	12.1718	12.0358	11.4892	14.8927666666667	11.8989333333333	-0.323779541364293	0.422907256939861	1	no	-	--	-	-	-	-
Unigene0000724	25.6666666666667	29.6666666666667	1.0424	1.3726	0.6009	1.2178	0.5231	0.7581	1.0053	0.833	-0.271237691672717	0.652594499881604	1	no	-	--	-	-	-	-
Unigene0000725	110.666666666667	133.333333333333	7.7884	6.2049	8.6804	5.8925	7.8969	7.3817	7.5579	7.05703333333333	-0.0989236056920796	0.825198365579194	1	no	-	--	-	-	-	-
Unigene0000726	22.3333333333333	23.3333333333333	0.6156	0.8901	0.5230	0.5114	0.5664	0.5117	0.676233333333333	0.529833333333333	-0.351982521604337	0.564413002171442	1	no	-	PREDICTED: mucin-19-like [Sinocyclocheilus anshuiensis]	-	-	-	-
Unigene0000727	38.3333333333333	44.6666666666667	1.3183	1.1398	0.7143	0.9933	0.5077	1.1466	1.05746666666667	0.882533333333333	-0.26088951240964	0.648711156691906	1	no	KCNH7	PREDICTED: potassium voltage-gated channel subfamily H member 2-like [Sinocyclocheilus rhinocerous]	-	-	-	-
Unigene0000728	16.6666666666667	31.3333333333333	1.7817	1.2421	0.9730	1.6652	2.1460	1.7771	1.33226666666667	1.86276666666667	0.483564089815335	0.409154807074765	1	no	-	--	-	-	-	-
Unigene0000729	46.6666666666667	25.3333333333333	0.3104	1.5870	2.4866	0.0242	1.1100	0.8951	1.46133333333333	0.676433333333333	-1.11126563772889	0.221158727564175	0.947656116456924	no	-	--	-	-	-	-
Unigene0000730	1697	2286.66666666667	6.6532	9.5151	8.8901	9.8150	9.3110	6.9124	8.3528	8.67946666666666	0.0553465006195884	0.87161962805268	1	no	Map4	PREDICTED: microtubule-associated protein 4-like isoform X3 [Sinocyclocheilus grahami]	-	-	-	-
Unigene0000731	247.666666666667	527	4.9632	7.4229	2.7762	9.7972	7.5231	6.2018	5.0541	7.8407	0.633528251038975	0.152806801123105	0.888882078759804	no	ICOSLG	PREDICTED: CD276 antigen homolog [Sinocyclocheilus anshuiensis]	-	-	-	-
Unigene0000732	34.6666666666667	68.3333333333333	2.6726	3.1466	2.3353	4.6626	5.4320	2.2214	2.71816666666667	4.10533333333333	0.594865447788916	0.264700933334357	0.978531761590764	no	-	PREDICTED: CXADR-like membrane protein [Cyprinus carpio]	-	-	-	-
Unigene0000733	12	30.6666666666667	0.4267	1.3220	0.5178	3.2790	0.4283	0.4433	0.7555	1.38353333333333	0.872853742574417	0.30968916459593	0.996829675044774	no	-	--	-	-	-	-
Unigene0000734	14.3333333333333	12.6666666666667	1.8360	0.6826	1.0027	0.6292	0.8293	0.8584	1.17376666666667	0.7723	-0.603912366795324	0.380370362105647	1	no	-	--	-	-	-	-
Unigene0000735	3.33333333333333	5	0.0785	0.3650	0.2287	0.3425	0.1182	0.2937	0.224066666666667	0.251466666666667	0.166439133367094	0.894218184872158	1	no	-	PREDICTED: zinc finger protein 2-like isoform X1 [Sinocyclocheilus anshuiensis]	-	-	-	-
Unigene0000736	35.6666666666667	45.6666666666667	2.3121	2.8654	2.0764	2.4490	0.9283	3.3630	2.41796666666667	2.24676666666667	-0.105944052011141	0.880932361022879	1	no	-	--	-	-	-	-
Unigene0000737	7	3.33333333333333	0.2334	0.2712	0.0637	0.0000	0.2196	0.0000	0.189433333333333	0.0732	-1.37177466104613	0.308956136835396	0.996829675044774	no	-	PREDICTED: E3 ubiquitin-protein ligase RNF213 isoform X3 [Salmo salar]	-	-	-	-
Unigene0000738	113	146.666666666667	0.8521	1.2692	0.9195	1.5672	0.7110	0.6592	1.0136	0.979133333333333	-0.0499111924935334	0.925570563385565	1	no	Flt3	PREDICTED: receptor-type tyrosine-protein kinase FLT3-like [Sinocyclocheilus grahami]	ko04060//Cytokine-cytokine receptor interaction//Signaling molecules and interaction//Environmental Information Processing	-	-	-
Unigene0000739	1015.33333333333	1157.33333333333	5.3031	7.0936	7.6278	6.3641	6.6359	4.7718	6.67483333333333	5.92393333333333	-0.172176409062754	0.627624018621631	1	no	CNNM2	PREDICTED: metal transporter CNNM2-like isoform X1 [Sinocyclocheilus grahami]	-	-	-	-
Unigene0000740	13.6666666666667	9.33333333333333	0.3348	0.3111	2.8438	0.0695	1.7639	0.4173	1.16323333333333	0.750233333333333	-0.632729247109506	0.560425033764295	1	no	Slc26a4	PREDICTED: pendrin-like [Sinocyclocheilus rhinocerous]	-	GO:0044425//membrane part;GO:0016020//membrane;GO:0031224//intrinsic component of membrane	GO:0022857//transmembrane transporter activity;GO:0005215//transporter activity;GO:0015075//ion transmembrane transporter activity;GO:0022891//substrate-specific transmembrane transporter activity;GO:0022892//substrate-specific transporter activity;GO:0015103//inorganic anion transmembrane transporter activity;GO:0008509//anion transmembrane transporter activity	GO:0048878//chemical homeostasis;GO:0051179//localization;GO:0006811//ion transport;GO:0006820//anion transport;GO:0006950//response to stress;GO:0042592//homeostatic process;GO:0015698//inorganic anion transport;GO:0044763//single-organism cellular process;GO:0065007//biological regulation;GO:0006810//transport;GO:0044699//single-organism process;GO:0009987//cellular process;GO:0009628//response…
Unigene0000741	293.333333333333	322	4.0986	2.5018	4.8552	3.1063	4.3631	2.4882	3.81853333333333	3.3192	-0.202183055249168	0.639306526555544	1	no	STEAP3	PREDICTED: metalloreductase STEAP3-like [Sinocyclocheilus anshuiensis]	ko04115//p53 signaling pathway//Cell growth and death//Cellular Processes	-	-	-
Unigene0000742	54	91.6666666666667	0.6795	2.0892	4.0346	4.4294	3.1479	1.9225	2.26776666666667	3.1666	0.481662432646699	0.445932345422669	1	no	-	--	-	-	-	-
Unigene0000743	26.3333333333333	50.6666666666667	0.7866	1.2185	1.4891	1.4049	2.2105	1.7325	1.16473333333333	1.78263333333333	0.614010301656208	0.257437291038946	0.972656864115642	no	-	PREDICTED: mucin-5AC [Danio rerio]	-	-	-	-
Unigene0000744	30.6666666666667	56.6666666666667	0.6513	0.5821	0.7478	0.8740	0.9240	1.0150	0.6604	0.937666666666667	0.505735026567648	0.317409542292775	0.997182210528705	no	-	PREDICTED: mucin-17-like [Cyprinus carpio]	-	-	-	-
Unigene0000745	8	10	0.4603	0.6417	1.1731	1.0038	1.0395	0.2869	0.758366666666667	0.776733333333333	0.0345238269649172	1	1	no	-	--	-	-	-	-
Unigene0000746	0	0.666666666666667	0.0000	0.0000	0.0000	0.1053	0.0000	0.0000	0.001	0.0351	5.1333991254172	0.549723146150018	1	no	C7orf55	PREDICTED: UPF0562 protein C7orf55 homolog [Danio rerio]	-	-	-	-
Unigene0000747	9.66666666666667	8.33333333333333	0.2979	0.2769	1.1388	0.6032	0.1682	0.4178	0.5712	0.3964	-0.527039016842612	0.578727756349414	1	no	-	--	-	-	-	-
Unigene0000748	3	7	0.1007	0.3745	0.2934	0.1883	0.3791	0.8163	0.2562	0.461233333333333	0.848226304649518	0.421150180198477	1	no	-	--	-	-	-	-
Unigene0000749	22.6666666666667	40.3333333333333	0.6432	0.4720	0.8381	1.0124	0.7390	0.9285	0.6511	0.8933	0.456265623427182	0.410006818313182	1	no	-	PREDICTED: low density lipoprotein receptor adapter protein 1-like isoform X1 [Sinocyclocheilus grahami]	-	-	-	-
Unigene0000750	32	38.3333333333333	2.5733	1.8844	2.1009	2.2349	2.1718	1.5555	2.1862	1.9874	-0.13754311888776	0.807517669438614	1	no	Tuba1b	PREDICTED: tubulin alpha chain-like [Peromyscus maniculatus bairdii]	ko04145//Phagosome//Transport and catabolism//Cellular Processes;ko04540//Gap junction//Cellular commiunity//Cellular Processes	GO:0043227//membrane-bounded organelle;GO:0044464//cell part;GO:0031988//membrane-bounded vesicle;GO:0043226//organelle;GO:0043228//non-membrane-bounded organelle;GO:0044430//cytoskeletal part;GO:0044422//organelle part;GO:0043231//intracellular membrane-bounded organelle;GO:0005623//cell;GO:0031982//vesicle;GO:0099513//polymeric cytoskeletal fiber;GO:0043232//intracellular non-membrane-bounded o…	GO:0001883//purine nucleoside binding;GO:1901363//heterocyclic compound binding;GO:0016817//hydrolase activity, acting on acid anhydrides;GO:0032550//purine ribonucleoside binding;GO:0032549//ribonucleoside binding;GO:0005198//structural molecule activity;GO:0017111//nucleoside-triphosphatase activity;GO:0097367//carbohydrate derivative binding;GO:0016818//hydrolase activity, acting on acid anhyd…	GO:0070670//response to interleukin-4;GO:0009259//ribonucleotide metabolic process;GO:1901565//organonitrogen compound catabolic process;GO:0006725//cellular aromatic compound metabolic process;GO:0009154//purine ribonucleotide catabolic process;GO:1901361//organic cyclic compound catabolic process;GO:0006793//phosphorus metabolic process;GO:1901136//carbohydrate derivative catabolic process;GO:0…
Unigene0000751	5.66666666666667	5	0.9424	0.4380	0.9149	0.7829	0.2365	0.4895	0.7651	0.502966666666667	-0.605185532237812	0.579290681864891	1	no	-	--	-	-	-	-
Unigene0000752	43	73.6666666666667	6.7892	2.0322	4.2733	5.3772	5.7170	5.7385	4.3649	5.6109	0.362283598629623	0.502391713314439	1	no	-	--	-	-	-	-
Unigene0000753	21	11.3333333333333	2.4249	0.6574	2.3543	0.9443	0.9887	0.3779	1.8122	0.7703	-1.23424985403234	0.0879469824461502	0.771617564019209	no	-	--	-	-	-	-
Unigene0000754	0.333333333333333	0	0.1387	0.0000	0.0000	0.0000	0.0000	0.0000	0.0462333333333333	0.001	-5.53086147671508	0.999999999999993	1	no	-	--	-	-	-	-
Unigene0000755	22.3333333333333	38.3333333333333	1.2768	1.3415	0.7276	0.6226	1.8804	1.7994	1.1153	1.43413333333333	0.362747332598076	0.55208700409108	1	no	-	--	-	-	-	-
Unigene0000756	22	23	1.6325	1.8967	1.2482	1.0172	1.3518	1.3739	1.59246666666667	1.24763333333333	-0.352069171281524	0.557932876372758	1	no	-	--	-	-	-	-
Unigene0000757	5	3.33333333333333	0.2410	1.0081	0.3510	0.0000	0.7257	0.1502	0.533366666666667	0.291966666666667	-0.869323996411572	0.4743442576711	1	no	-	--	-	-	-	-
Unigene0000758	34.3333333333333	38.6666666666667	1.8547	1.3610	1.2439	0.9427	1.6166	1.2474	1.48653333333333	1.2689	-0.228373436785185	0.684732472344942	1	no	-	--	-	-	-	-
Unigene0000759	37.6666666666667	51	2.3433	2.3336	3.3516	2.7114	3.1499	2.6606	2.67616666666667	2.84063333333333	0.0860446544966457	0.891522110290058	1	no	-	--	-	-	-	-
Unigene0000760	82	76.3333333333333	2.7142	1.2362	1.9171	1.1331	1.5732	1.4382	1.95583333333333	1.3815	-0.501547873876882	0.309118989773223	0.996829675044774	no	NT5C1A	PREDICTED: cytosolic 5'-nucleotidase 1A-like isoform X2 [Latimeria chalumnae]	ko01100//Metabolic pathways//Global and Overview//Metabolism;ko01110//Biosynthesis of secondary metabolites//Global and Overview//Metabolism;ko00230//Purine metabolism//Nucleotide metabolism//Metabolism;ko00240//Pyrimidine metabolism//Nucleotide metabolism//Metabolism;ko00760//Nicotinate and nicotinamide metabolism//Metabolism of cofactors and vitamins//Metabolism	-	-	-
Unigene0000761	11	4.66666666666667	0.8348	0.6207	0.9118	0.3121	0.1257	0.3122	0.7891	0.25	-1.65828004484732	0.034842210401771	0.58869050345173	no	-	--	-	-	-	-
Unigene0000762	33.3333333333333	24	2.1332	1.8411	2.5518	0.7595	0.7455	2.0421	2.17536666666667	1.18236666666667	-0.879581090772399	0.144174548602632	0.878346043872169	no	-	--	-	-	-	-
Unigene0000763	5.66666666666667	17.6666666666667	0.7204	0.5859	0.1311	1.0661	0.4067	1.5719	0.479133333333333	1.0149	1.08283849251498	0.17837531448526	0.91623557389192	no	-	--	-	-	-	-
Unigene0000764	211	262.333333333333	6.6397	4.3850	5.1529	5.2257	4.7351	5.1375	5.39253333333333	5.03276666666667	-0.0996114773167146	0.805947425110073	1	no	-	--	-	-	-	-
Unigene0000765	10.6666666666667	23	0.4486	0.1042	0.8983	0.7686	0.4221	1.2934	0.4837	0.828033333333333	0.775576308282286	0.32702415960945	1	no	Znf354c	PREDICTED: gastrula zinc finger protein XlCGF49.1-like [Sinocyclocheilus rhinocerous]	-	-	-	-
Unigene0000766	9.33333333333333	13.6666666666667	0.3820	0.7989	1.0431	0.9521	1.0065	0.6549	0.741333333333333	0.871166666666667	0.232826371236387	0.794183322815088	1	no	-	--	-	-	-	-
Unigene0000767	77	62.3333333333333	3.7710	2.8865	2.4551	1.8797	1.5362	2.0189	3.03753333333333	1.8116	-0.74563579617523	0.116925777061685	0.834577937767653	no	-	--	-	-	-	-
Unigene0000768	21	9.66666666666667	4.3571	1.8408	1.4421	0.7404	1.2921	0.5761	2.54666666666667	0.869533333333333	-1.55029689849752	0.0294452336394206	0.561094846268852	no	-	Nipped-B-like B, partial [Nestor notabilis]	-	-	-	-
Unigene0000769	24.6666666666667	45.3333333333333	4.5548	2.9197	2.8592	4.4037	2.0099	7.2452	3.44456666666667	4.55293333333333	0.402473834300782	0.505873910725031	1	no	-	--	-	-	-	-
Unigene0000770	17.3333333333333	15.3333333333333	0.9523	1.5933	0.4623	0.4747	0.4779	0.9498	1.00263333333333	0.634133333333333	-0.660935984085883	0.335591365232206	1	no	-	--	-	-	-	-
Unigene0000771	7	2	0.5944	0.4144	1.5150	0.0926	0.0000	0.4632	0.841266666666667	0.185266666666667	-2.18295984799082	0.0674936657477025	0.719290199272584	no	-	--	-	-	-	-
Unigene0000772	169.666666666667	347	5.4560	8.7808	7.8722	15.2346	11.7889	7.7785	7.36966666666667	11.6006666666667	0.65453644431447	0.131154146975205	0.859359997643705	no	-	PREDICTED: cytochrome c oxidase copper chaperone [Anolis carolinensis]	ko01100//Metabolic pathways//Global and Overview//Metabolism;ko00190//Oxidative phosphorylation//Energy metabolism//Metabolism	-	-	-
Unigene0000773	5.33333333333333	51.3333333333333	0.8608	0.3200	0.1254	7.6695	0.1944	0.4293	0.4354	2.7644	2.66655307163432	0.0195731364448544	0.490101990441289	no	-	--	-	-	-	-
Unigene0000774	14	16.6666666666667	0.6270	0.7909	0.2935	0.6418	0.6068	0.2513	0.570466666666667	0.499966666666667	-0.190310677850665	0.81484870858352	1	no	-	PREDICTED: E3 ubiquitin-protein ligase CBL-like [Sinocyclocheilus anshuiensis]	-	GO:0005623//cell;GO:0005622//intracellular;GO:0043227//membrane-bounded organelle;GO:0043231//intracellular membrane-bounded organelle;GO:0044464//cell part;GO:0044424//intracellular part;GO:0043229//intracellular organelle;GO:0043226//organelle	GO:0019787//ubiquitin-like protein transferase activity;GO:0045309//protein phosphorylated amino acid binding;GO:0043167//ion binding;GO:0043169//cation binding;GO:0005515//protein binding;GO:0005488//binding;GO:0016740//transferase activity;GO:0046914//transition metal ion binding;GO:0046872//metal ion binding;GO:0003824//catalytic activity;GO:0051219//phosphoprotein binding	GO:0009987//cellular process;GO:0051716//cellular response to stimulus;GO:0050794//regulation of cellular process;GO:0044700//single organism signaling;GO:0044763//single-organism cellular process;GO:0065007//biological regulation;GO:0007165//signal transduction;GO:0050789//regulation of biological process;GO:0044699//single-organism process;GO:0050896//response to stimulus;GO:0023052//signaling;…
Unigene0000775	31.3333333333333	11.6666666666667	1.4699	0.8073	2.8705	1.0824	0.0000	0.3749	1.7159	0.485766666666667	-1.82063007657418	0.0390607490101516	0.610607275570021	no	-	--	-	-	-	-
Unigene0000776	69	145.666666666667	0.5805	1.0055	0.7781	1.3645	1.5294	0.9622	0.788033333333333	1.28536666666667	0.705851403439508	0.130649744352474	0.859209141209944	no	SLC5A5	PREDICTED: sodium/iodide cotransporter [Sinocyclocheilus grahami]	-	GO:0044425//membrane part;GO:0016020//membrane;GO:0031224//intrinsic component of membrane	-	GO:0044699//single-organism process;GO:0009987//cellular process;GO:0044763//single-organism cellular process
Unigene0000777	765	933.333333333333	20.9632	32.1284	23.9631	25.1625	25.4980	20.9710	25.6849	23.8771666666667	-0.105288804383827	0.770336975720467	1	no	LAMP1	--	ko04145//Phagosome//Transport and catabolism//Cellular Processes;ko04142//Lysosome//Transport and catabolism//Cellular Processes	-	-	-
Unigene0000778	1823.33333333333	2495.66666666667	24.9959	35.6419	26.1259	29.0346	37.7412	24.3563	28.9212333333333	30.3773666666667	0.0708677351551166	0.837383149521522	1	no	LAMP1	PREDICTED: lysosome-associated membrane glycoprotein 1-like [Sinocyclocheilus anshuiensis]	ko04145//Phagosome//Transport and catabolism//Cellular Processes;ko04142//Lysosome//Transport and catabolism//Cellular Processes	-	-	-
Unigene0000779	16	24.6666666666667	0.7310	0.9060	1.5969	1.7713	1.2840	0.9114	1.07796666666667	1.32223333333333	0.29466422325063	0.680026923116456	1	no	-	--	-	-	-	-
Unigene0000780	3.33333333333333	4	0.5774	0.0000	0.4204	0.5756	0.2608	0.0720	0.3326	0.3028	-0.135422963301537	1	1	no	zgc:103499	--	-	-	-	-
Unigene0000781	101.333333333333	178.333333333333	14.5927	11.9156	10.2286	4.3337	10.6768	32.3058	12.2456333333333	15.7721	0.365107371976927	0.554595673978781	1	no	-	--	-	-	-	-
Unigene0000782	924.666666666667	1562.33333333333	21.9579	19.5263	23.5386	22.9147	33.7733	28.4079	21.6742666666667	28.3653	0.38814394075253	0.262320238720825	0.977269839747205	no	zgc:162885	PREDICTED: mitochondrial inner membrane protease ATP23 homolog isoform X1 [Sinocyclocheilus grahami]	-	-	GO:0008233//peptidase activity;GO:0070011//peptidase activity, acting on L-amino acid peptides;GO:0043169//cation binding;GO:0004175//endopeptidase activity;GO:0005488//binding;GO:0016787//hydrolase activity;GO:0003824//catalytic activity;GO:0043167//ion binding	GO:0010467//gene expression;GO:0071704//organic substance metabolic process;GO:0043170//macromolecule metabolic process;GO:0008152//metabolic process;GO:0044238//primary metabolic process;GO:0006508//proteolysis;GO:0016485//protein processing;GO:0051604//protein maturation;GO:0019538//protein metabolic process
Unigene0000783	724.333333333333	1078	4.6615	5.6930	5.1544	6.4031	5.9907	5.2070	5.16963333333333	5.86693333333333	0.182544640471264	0.598973533691507	1	no	PACS2	PREDICTED: phosphofurin acidic cluster sorting protein 2-like isoform X2 [Sinocyclocheilus anshuiensis]	-	-	-	-
Unigene0000784	8	9	0.7344	0.2560	0.8690	0.4004	0.6910	0.5723	0.6198	0.554566666666667	-0.160441851997755	0.875893601880819	1	no	-	--	-	-	-	-
Unigene0000785	17.3333333333333	20.3333333333333	0.7498	0.4181	1.0191	0.4672	0.5644	0.9659	0.729	0.665833333333333	-0.130757717232755	0.863548143010575	1	no	-	--	-	-	-	-
Unigene0000786	52.3333333333333	38.6666666666667	1.1853	2.6626	2.6973	1.3848	1.2269	1.1699	2.18173333333333	1.26053333333333	-0.791440507097716	0.13336673322688	0.863349731670363	no	-	PREDICTED: S-antigen protein-like [Cavia porcellus]	-	-	-	-
Unigene0000787	102	102.333333333333	6.9209	5.1957	5.7179	5.4317	5.6606	2.6135	5.94483333333333	4.5686	-0.379884229687424	0.43086180184731	1	no	-	--	-	-	-	-
Unigene0000788	28.3333333333333	50	1.3094	1.5947	0.5918	2.5881	1.4615	0.4222	1.1653	1.4906	0.355191748265481	0.595425855316419	1	no	-	PREDICTED: homeobox expressed in ES cells 1-A-like [Sinocyclocheilus anshuiensis]	-	-	-	-
Unigene0000789	2	5.33333333333333	0.4002	0.0000	0.0583	0.1995	0.1205	0.4990	0.152833333333333	0.273	0.836941718045958	0.462039798859262	1	no	-	PREDICTED: IgGFc-binding protein-like [Cyprinus carpio]	-	-	-	-
Unigene0000790	53.6666666666667	119.333333333333	1.1171	1.3350	1.2589	1.5578	1.9421	2.7689	1.237	2.0896	0.756381301682699	0.109602120081265	0.821548713392545	no	pol	PREDICTED: uncharacterized protein LOC109098236 [Cyprinus carpio]	-	-	-	-
Unigene0000791	1211.33333333333	1754	6.0986	7.3068	7.5688	4.8479	9.5499	9.2244	6.9914	7.87406666666667	0.171527548823172	0.644896134522632	1	no	pol	PREDICTED: uncharacterized protein LOC109070003 [Cyprinus carpio]	-	-	-	-
Unigene0000792	86	79.3333333333333	1.6095	2.2710	0.6919	0.7974	1.8539	0.5440	1.52413333333333	1.0651	-0.517000228933918	0.391304595706584	1	no	inaW	PREDICTED: extensin-1-like [Nannospalax galili]	-	-	-	-
Unigene0000793	16.3333333333333	16.6666666666667	1.5569	1.7572	1.4576	0.5543	2.0091	1.2478	1.59056666666667	1.2704	-0.324258024358575	0.649996805063581	1	no	-	--	-	-	-	-
Unigene0000794	29.3333333333333	47.3333333333333	2.9399	1.1800	1.2163	1.8317	3.3195	1.3328	1.77873333333333	2.16133333333333	0.281071351319293	0.638981180111611	1	no	hba1	PREDICTED: hemoglobin embryonic subunit alpha-like [Sinocyclocheilus rhinocerous]	-	GO:0032991//macromolecular complex;GO:0043234//protein complex	GO:0022892//substrate-specific transporter activity;GO:0005215//transporter activity;GO:0046906//tetrapyrrole binding;GO:0046872//metal ion binding;GO:0043167//ion binding;GO:1901363//heterocyclic compound binding;GO:0005488//binding;GO:0097159//organic cyclic compound binding;GO:0046914//transition metal ion binding;GO:0043169//cation binding	GO:1902578//single-organism localization;GO:0044765//single-organism transport;GO:0051234//establishment of localization;GO:0006810//transport;GO:0015669//gas transport;GO:0044699//single-organism process;GO:0051179//localization
Unigene0000795	535.666666666667	642	8.5328	9.1150	10.3063	8.6802	10.0153	7.2980	9.31803333333333	8.6645	-0.104908992830171	0.77227885073805	1	no	-	--	-	-	-	-
Unigene0000796	0.333333333333333	1.66666666666667	0.0000	0.1345	0.0000	0.0000	0.4358	0.0902	0.0448333333333333	0.175333333333333	1.96745662673568	0.355172553077439	1	no	-	--	-	-	-	-
Unigene0000797	245.333333333333	286.666666666667	2.3212	4.3149	2.1201	3.3773	2.1210	2.0575	2.91873333333333	2.5186	-0.212720392951826	0.634672175016656	1	no	-	--	-	-	-	-
Unigene0000798	358.666666666667	152.666666666667	22.5096	9.7092	12.2172	3.5710	6.0193	4.6389	14.812	4.74306666666667	-1.64287440299945	0.000362240899093588	0.0751307286018489	no	-	PREDICTED: uncharacterized protein LOC109201215 isoform X3 [Oreochromis niloticus]	-	-	-	-
Unigene0000799	538	526	4.8092	4.0769	4.1112	4.0678	2.7550	2.6941	4.33243333333333	3.1723	-0.449648338479716	0.229681165332605	0.952892324126217	no	abhd11	PREDICTED: protein ABHD11 isoform X1 [Sinocyclocheilus anshuiensis]	-	-	-	-
Unigene0000800	84.6666666666667	68.6666666666667	1.5942	2.1965	0.5872	0.6077	0.7200	1.2042	1.4593	0.843966666666667	-0.790018575688466	0.166042357386321	0.901847877596818	no	-	pol-like protein [Danio rerio]	-	-	-	-
Unigene0000801	18.3333333333333	26.6666666666667	1.2680	0.9107	0.6715	1.0055	0.7376	1.2575	0.950066666666667	1.0002	0.0741878533968208	0.938903910403496	1	no	-	--	-	-	-	-
Unigene0000802	2.66666666666667	3	0.2637	0.0817	0.0000	0.0274	0.2647	0.0000	0.115133333333333	0.0973666666666667	-0.241805724699741	0.999999999999998	1	no	-	PREDICTED: zonadhesin-like [Sinocyclocheilus grahami]	-	-	-	-
Unigene0000803	0	0.666666666666667	0.0000	0.0000	0.0000	0.1173	0.0000	0.0000	0.001	0.0391	5.28909670241999	0.549744156876829	1	no	-	PREDICTED: zonadhesin-like [Sinocyclocheilus grahami]	-	-	-	-
Unigene0000804	0	0	0.0000	0.0000	0.0000	0.0000	0.0000	0.0000	0.001	0.001	0	notest	notest	notest	-	PREDICTED: zonadhesin-like [Sinocyclocheilus grahami]	-	-	-	-
Unigene0000805	0.666666666666667	2.66666666666667	0.0970	0.0000	0.0000	0.2419	0.0000	0.0000	0.0323333333333333	0.0806333333333333	1.31835411690544	0.617711951206926	1	no	-	PREDICTED: zonadhesin-like [Sinocyclocheilus grahami]	-	-	-	-
Unigene0000806	2189.33333333333	2236.66666666667	11.8779	11.4300	10.2566	9.1066	7.7441	8.8423	11.1881666666667	8.56433333333333	-0.385560797252939	0.229213925187438	0.952302802092125	no	C2CD2	PREDICTED: C2 domain-containing protein 2-like isoform X2 [Sinocyclocheilus rhinocerous]	-	-	-	-
Unigene0000807	55.3333333333333	67.6666666666667	1.8535	4.5481	4.0489	3.1874	3.0695	3.6511	3.4835	3.30266666666667	-0.0769061954287526	0.88689182967556	1	no	-	--	-	-	-	-
Unigene0000808	13.6666666666667	19.6666666666667	0.6526	0.3466	0.6449	0.4356	0.6316	0.7555	0.548033333333333	0.607566666666667	0.148779074785747	0.843345776380945	1	no	-	PREDICTED: scavenger receptor cysteine-rich type 1 protein M130-like [Sinocyclocheilus grahami]	-	-	-	-
Unigene0000809	17.6666666666667	23.6666666666667	1.2568	0.9222	0.9152	0.7007	0.6971	1.6494	1.0314	1.01573333333333	-0.0220822583570382	0.999999999999994	1	no	-	reverse transcriptase [Danio rerio]	-	-	-	-
Unigene0000810	3517.66666666667	4882.66666666667	9.2683	10.7841	13.7776	13.1118	13.6045	10.0461	11.2766666666667	12.2541333333333	0.119927777609119	0.712495517899155	1	no	NAV2	PREDICTED: neuron navigator 2-like [Sinocyclocheilus anshuiensis]	-	-	-	-
Unigene0000811	45	51.6666666666667	1.6616	1.7590	1.9493	0.9203	1.3898	2.3881	1.78996666666667	1.56606666666667	-0.192787092674855	0.727479052480165	1	no	rpl36	PREDICTED: 60S ribosomal protein L36 [Astyanax mexicanus]	ko03010//Ribosome//Translation//Genetic Information Processing	GO:0030529//intracellular ribonucleoprotein complex;GO:0032991//macromolecular complex;GO:1990904//ribonucleoprotein complex;GO:0005623//cell;GO:0044424//intracellular part;GO:0044464//cell part;GO:0005622//intracellular	-	GO:0048856//anatomical structure development;GO:0048731//system development;GO:0007399//nervous system development;GO:0071704//organic substance metabolic process;GO:0007049//cell cycle;GO:0044707//single-multicellular organism process;GO:0007417//central nervous system development;GO:0009987//cellular process;GO:0032501//multicellular organismal process;GO:0007275//multicellular organism develop…
Unigene0000812	6273.66666666667	7562	45.4171	39.3414	53.4371	27.3537	45.9110	55.6841	46.0652	42.9829333333333	-0.0999133351494008	0.772579771039795	1	no	Ttll4	tubulin polyglutamylase TTLL4 [Chanodichthys ilishaeformis]	-	-	-	GO:0043412//macromolecule modification;GO:0036211//protein modification process;GO:0043170//macromolecule metabolic process;GO:0044238//primary metabolic process;GO:0019538//protein metabolic process;GO:0071704//organic substance metabolic process;GO:0008152//metabolic process
Unigene0000813	5	4	0.0000	0.2926	0.2619	0.0841	0.1015	0.1682	0.184833333333333	0.117933333333333	-0.648253412358615	0.579538477111787	1	no	-	--	-	-	-	-
Unigene0000814	4	4.33333333333333	0.8470	0.0984	0.2313	0.4618	0.0797	0.3300	0.392233333333333	0.2905	-0.433173982280723	0.820802870830974	1	no	-	--	-	-	-	-
Unigene0000815	20	20.6666666666667	1.3019	0.8251	0.9911	0.7743	0.8464	0.8116	1.03936666666667	0.810766666666667	-0.358346015347163	0.551287507977173	1	no	-	PREDICTED: uncharacterized protein LOC108180325 [Danio rerio]	-	-	-	-
Unigene0000816	29.6666666666667	15.6666666666667	1.3097	0.7378	1.0404	0.4204	0.8365	0.0495	1.0293	0.435466666666667	-1.24102933643827	0.0983694323358177	0.795869264533292	no	-	PREDICTED: LOW QUALITY PROTEIN: tetra-peptide repeat homeobox protein 1-like [Coturnix japonica]	-	-	-	-
Unigene0000817	13.6666666666667	19.3333333333333	1.4937	1.6486	0.4079	1.9776	0.9838	0.5819	1.1834	1.1811	-0.00280668186981667	1	1	no	-	--	-	-	-	-
Unigene0000818	23	82	0.1598	0.5644	1.0472	2.7080	0.7698	1.5539	0.590466666666667	1.67723333333333	1.50615588444319	0.0275408074828864	0.548348072694303	no	nadX	PREDICTED: putative L-aspartate dehydrogenase isoform X1 [Cyprinus carpio]	-	-	GO:0000166//nucleotide binding;GO:0016638//oxidoreductase activity, acting on the CH-NH2 group of donors;GO:0097159//organic cyclic compound binding;GO:0036094//small molecule binding;GO:0016491//oxidoreductase activity;GO:1901265//nucleoside phosphate binding;GO:1901363//heterocyclic compound binding;GO:0003824//catalytic activity;GO:0005488//binding	GO:0046496//nicotinamide nucleotide metabolic process;GO:1901564//organonitrogen compound metabolic process;GO:0008152//metabolic process;GO:0009165//nucleotide biosynthetic process;GO:1901362//organic cyclic compound biosynthetic process;GO:0018130//heterocycle biosynthetic process;GO:0006739//NADP metabolic process;GO:0090407//organophosphate biosynthetic process;GO:0019359//nicotinamide nucleo…
Unigene0000819	65.3333333333333	99.3333333333333	0.4020	1.1923	1.5056	0.9543	1.2971	1.5276	1.0333	1.25966666666667	0.285782842398709	0.611205433342882	1	no	CDHR5	PREDICTED: cadherin-related family member 5-like [Sinocyclocheilus anshuiensis]	-	-	-	-
Unigene0000820	42.3333333333333	49.3333333333333	1.9336	1.2539	1.7681	1.7090	1.7263	1.0091	1.65186666666667	1.48146666666667	-0.157071076079078	0.769625449856878	1	no	-	--	-	-	-	-
Unigene0000821	35	72.3333333333333	5.0389	3.0623	1.3406	3.5018	3.5013	6.7050	3.14726666666667	4.56936666666667	0.537894792774021	0.360178454440849	1	no	-	--	-	-	-	-
Unigene0000822	447.666666666667	533.666666666667	2.8536	3.8173	3.6249	3.9768	3.4864	2.0060	3.43193333333333	3.1564	-0.120741483338748	0.76266664484031	1	no	NCAM2	PREDICTED: neural cell adhesion molecule 2-like [Sinocyclocheilus rhinocerous]	ko04514//Cell adhesion molecules (CAMs)//Signaling molecules and interaction//Environmental Information Processing	-	-	-
Unigene0000823	137.666666666667	192.666666666667	2.8194	3.1314	2.6793	3.1859	2.7339	3.1576	2.8767	3.0258	0.0729018553349207	0.861562274854025	1	no	tmem120a	PREDICTED: transmembrane protein 120A-like [Sinocyclocheilus grahami]	-	-	-	-
Unigene0000824	620.333333333333	500.666666666667	9.9793	4.9760	10.7526	5.6837	4.4805	5.7469	8.5693	5.3037	-0.69217818704549	0.0875514128324626	0.770533008214788	no	Trim35	PREDICTED: tripartite motif-containing protein 35-like isoform X1 [Sinocyclocheilus anshuiensis]	-	-	-	-
Unigene0000825	52	74.3333333333333	1.9359	1.4944	1.1468	1.6560	1.5561	1.6159	1.5257	1.60933333333333	0.0769918639603244	0.884059080794822	1	no	-	--	-	-	-	-
Unigene0000826	0	0.666666666666667	0.0000	0.0000	0.0000	0.0000	0.1008	0.0000	0.001	0.0336	5.0703893278914	0.551714059561959	1	no	-	--	-	-	-	-
Unigene0000827	111.666666666667	172.666666666667	2.6840	3.9500	4.0445	5.0170	4.7144	3.1139	3.5595	4.28176666666667	0.266531577465516	0.558516419837696	1	no	-	--	-	-	-	-
Unigene0000828	8.66666666666667	8.66666666666667	0.3393	1.1564	0.9883	0.5638	1.1920	0.2820	0.828	0.679266666666667	-0.285652708495812	0.723131854918863	1	no	-	--	-	-	-	-
Unigene0000829	34.6666666666667	48.6666666666667	1.0866	0.9378	1.4128	0.9188	1.6066	1.2821	1.14573333333333	1.26916666666667	0.147610236613241	0.798258808558402	1	no	SPOCK2	PREDICTED: testican-2-like isoform X2 [Sinocyclocheilus anshuiensis]	-	-	-	-
Unigene0000830	3.66666666666667	0.666666666666667	0.1248	0.0580	0.1136	0.0389	0.0000	0.0000	0.0988	0.0129666666666667	-2.92970338731964	0.0647958664398775	0.71167532023503	no	FAM19A4	PREDICTED: protein FAM19A4-like isoform X1 [Sinocyclocheilus anshuiensis]	-	-	-	-
Unigene0000831	341	469.333333333333	1.4901	1.1524	2.2487	1.4529	2.2048	1.7124	1.6304	1.79003333333333	0.13476049645246	0.745304389816383	1	no	RYR3	PREDICTED: ryanodine receptor 3-like [Sinocyclocheilus anshuiensis]	ko04020//Calcium signaling pathway//Signal transduction//Environmental Information Processing	-	-	-
Unigene0000832	45.3333333333333	40.6666666666667	4.7610	4.5988	2.1752	3.8971	1.9676	1.5712	3.845	2.47863333333333	-0.633438730274611	0.272747686632129	0.983839344944986	no	-	--	-	-	-	-
Unigene0000833	25324	29707	192.8715	160.8276	178.1129	121.8888	157.2911	194.2392	177.270666666667	157.806366666667	-0.167798418567212	0.596205158019272	1	no	Caprin1	PREDICTED: caprin-1-like isoform X1 [Sinocyclocheilus rhinocerous]	-	-	-	-
Unigene0000834	3	5.33333333333333	0.3249	0.4027	0.1577	0.3374	0.2446	0.5401	0.2951	0.374033333333333	0.341962926058988	0.786421499744835	1	no	-	--	-	-	-	-
Unigene0000835	874	1743	3.3674	2.8185	3.7550	4.6163	5.8693	4.8879	3.31363333333333	5.1245	0.628997275551407	0.0669869459721198	0.717640290395053	no	PTPRZ1	PREDICTED: receptor-type tyrosine-protein phosphatase zeta-like [Sinocyclocheilus anshuiensis]	-	-	-	-
Unigene0000836	3.33333333333333	0.666666666666667	1.0214	0.1055	0.0000	0.0707	0.0854	0.0000	0.375633333333333	0.0520333333333333	-2.85181705541968	0.135352042976517	0.86652167257207	no	-	--	-	-	-	-
Unigene0000837	14.3333333333333	5	1.4604	1.7751	1.0634	0.7000	0.0846	0.2801	1.43296666666667	0.3549	-2.0135205708464	0.0105078184595152	0.399209215891607	no	-	--	-	-	-	-
Unigene0000838	10.6666666666667	10.3333333333333	0.5780	0.6268	1.3328	0.9004	0.5802	0.4804	0.845866666666667	0.653666666666667	-0.371875140624467	0.633548367013864	1	no	-	--	-	-	-	-
Unigene0000839	3.66666666666667	5.66666666666667	0.0000	0.7575	0.4945	0.0000	1.1247	0.5080	0.417333333333333	0.544233333333333	0.383025165387821	0.795024314091797	1	no	-	--	-	-	-	-
Unigene0000840	1215	1513.66666666667	7.0215	6.9044	7.1763	7.5781	7.4690	5.1086	7.03406666666667	6.71856666666667	-0.0662055259468633	0.847888459763562	1	no	CCNT1	PREDICTED: cyclin-T1-like isoform X1 [Sinocyclocheilus grahami]	-	-	-	GO:0065007//biological regulation;GO:0006807//nitrogen compound metabolic process;GO:0006725//cellular aromatic compound metabolic process;GO:0034654//nucleobase-containing compound biosynthetic process;GO:0046483//heterocycle metabolic process;GO:0010467//gene expression;GO:1901360//organic cyclic compound metabolic process;GO:0071704//organic substance metabolic process;GO:0006139//nucleobase-c…
Unigene0000841	26	28	0.5310	1.0693	1.2887	1.2681	0.2998	0.7999	0.963	0.789266666666667	-0.287022977324934	0.661459348017008	1	no	-	--	-	-	-	-
Unigene0000842	59	34	2.7676	1.4841	1.3952	0.5085	0.3472	1.4598	1.8823	0.771833333333333	-1.28613532606058	0.038539505032807	0.609306243483829	no	-	--	-	-	-	-
Unigene0000843	1.66666666666667	1	0.0000	0.0000	0.4118	0.0000	0.0000	0.2115	0.137266666666667	0.0705	-0.961286166624946	0.635880201459047	1	no	-	--	-	-	-	-
Unigene0000844	228.333333333333	254	2.4183	1.6625	4.0740	2.4251	2.9406	1.9356	2.71826666666667	2.43376666666667	-0.159496135236621	0.723171320267777	1	no	Igsf5	PREDICTED: immunoglobulin superfamily member 5-like [Sinocyclocheilus rhinocerous]	ko04530//Tight junction//Cellular commiunity//Cellular Processes	-	-	-
Unigene0000845	540.666666666667	575	8.2928	6.2779	7.2148	4.1892	3.9957	9.0442	7.26183333333333	5.74303333333333	-0.338520883815519	0.419656963001555	1	no	-	--	-	-	-	-
Unigene0000846	16	29.6666666666667	1.6709	0.5177	0.8111	0.9543	1.7295	1.4756	0.9999	1.38646666666667	0.471557208340461	0.455463958731779	1	no	-	PREDICTED: astrotactin-2-like [Sinocyclocheilus grahami]	-	-	-	-
Unigene0000847	93	127	1.8273	1.7370	1.5271	3.1309	1.1567	0.8414	1.69713333333333	1.70966666666667	0.0106151575801261	0.986711061895971	1	no	zgc:171711	PREDICTED: repressor of yield of DENV protein homolog [Sinocyclocheilus rhinocerous]	-	-	-	-
Unigene0000848	329.666666666667	409	2.2650	2.3439	3.1183	2.9596	2.2986	2.1493	2.57573333333333	2.46916666666667	-0.0609590179436776	0.876658500878422	1	no	-	PREDICTED: titin-like [Sinocyclocheilus anshuiensis]	-	-	-	-
Unigene0000849	4	3	0.9038	0.5601	0.2194	0.3754	0.0000	0.4695	0.5611	0.281633333333333	-0.994439815378613	0.418440429747177	1	no	-	--	-	-	-	-
Unigene0000850	1.66666666666667	2.33333333333333	0.3674	0.0000	0.0000	0.0458	0.3319	0.0000	0.122466666666667	0.1259	0.0398891573288194	1	1	no	-	--	-	-	-	-
Unigene0000851	11.6666666666667	4	0.6555	1.1509	0.4773	0.1815	0.3290	0.0908	0.761233333333333	0.200433333333333	-1.92521627876205	0.0209425037356264	0.501476633118547	no	-	--	-	-	-	-
Unigene0000852	34.3333333333333	31.3333333333333	0.5923	1.2663	0.7979	1.3840	0.1115	0.2585	0.8855	0.584666666666667	-0.598877965028336	0.458711358517106	1	no	-	PREDICTED: interleukin-15 receptor subunit alpha isoform X1 [Sinocyclocheilus rhinocerous]	ko04060//Cytokine-cytokine receptor interaction//Signaling molecules and interaction//Environmental Information Processing;ko04630//Jak-STAT signaling pathway//Signal transduction//Environmental Information Processing;ko04672//Intestinal immune network for IgA production//Immune system//Organismal Systems	-	-	-
Unigene0000853	1498	2324	10.1527	11.5449	13.0160	12.0291	14.7229	14.8909	11.5712	13.8809666666667	0.262569552318573	0.426333094440865	1	no	Sapcd2	suppressor APC domain-containing protein 2 [Danio rerio]	-	-	-	-
Unigene0000854	17523.6666666667	22340	118.2044	137.8803	136.1942	109.9735	153.3054	123.4845	130.759633333333	128.921133333333	-0.0204284605630932	0.947189674193683	1	no	cct3	PREDICTED: T-complex protein 1 subunit gamma-like [Sinocyclocheilus grahami]	-	GO:0044464//cell part;GO:0005623//cell;GO:0005622//intracellular;GO:0044424//intracellular part	GO:0005515//protein binding;GO:0001883//purine nucleoside binding;GO:0005488//binding;GO:0032549//ribonucleoside binding;GO:0036094//small molecule binding;GO:0097367//carbohydrate derivative binding;GO:0032550//purine ribonucleoside binding;GO:1901363//heterocyclic compound binding;GO:0001882//nucleoside binding;GO:0097159//organic cyclic compound binding	GO:0050789//regulation of biological process;GO:0044238//primary metabolic process;GO:0010941//regulation of cell death;GO:0065007//biological regulation;GO:0043170//macromolecule metabolic process;GO:0043067//regulation of programmed cell death;GO:0044699//single-organism process;GO:0009987//cellular process;GO:0008152//metabolic process;GO:0048731//system development;GO:0044707//single-multicel…
Unigene0000855	24	29.3333333333333	1.3959	0.8169	1.0541	1.1275	0.6616	1.1602	1.08896666666667	0.9831	-0.14754971503668	0.815854235637153	1	no	-	PREDICTED: trichohyalin-like [Sinocyclocheilus rhinocerous]	-	-	-	-
Unigene0000856	1444.33333333333	1976.33333333333	50.0912	73.8237	65.8164	68.2068	73.1214	58.7809	63.2437666666667	66.7030333333333	0.0768290755786046	0.821180853122949	1	no	Tmsb4x	thymosin beta a [Cyprinus carpio]	ko04810//Regulation of actin cytoskeleton//Cell motility//Cellular Processes	GO:0005622//intracellular;GO:0044464//cell part;GO:0005623//cell;GO:0044424//intracellular part	GO:0005488//binding;GO:0008092//cytoskeletal protein binding;GO:0005515//protein binding	GO:0030837//negative regulation of actin filament polymerization;GO:0031333//negative regulation of protein complex assembly;GO:0032956//regulation of actin cytoskeleton organization;GO:0032271//regulation of protein polymerization;GO:0030832//regulation of actin filament length;GO:0051493//regulation of cytoskeleton organization;GO:0065007//biological regulation;GO:0071840//cellular component or…
Unigene0000857	16	15.3333333333333	0.5298	0.7113	1.1144	0.4768	0.3545	0.9174	0.785166666666667	0.5829	-0.429750524527627	0.524453149409057	1	no	MOG	PREDICTED: butyrophilin subfamily 1 member A1-like [Cyprinus carpio]	-	-	-	-
Unigene0000858	1338	1413.33333333333	15.2304	11.8059	13.5650	9.8509	11.2291	11.5044	13.5337666666667	10.8614666666667	-0.317344491522535	0.345569640032521	1	no	HNRNPUL1	PREDICTED: heterogeneous nuclear ribonucleoprotein U-like protein 2 isoform X1 [Sinocyclocheilus rhinocerous]	-	-	-	-
Unigene0000859	3.33333333333333	1.66666666666667	0.1637	0.0000	0.4767	0.0510	0.1232	0.1020	0.213466666666667	0.0920666666666667	-1.21325998825821	0.384600335645236	1	no	-	--	-	-	-	-
Unigene0000860	101.666666666667	131.333333333333	3.9749	2.4037	5.8585	4.4162	5.0471	3.1645	4.07903333333333	4.20926666666667	0.045341613907331	0.936813562708552	1	no	-	--	-	-	-	-
Unigene0000861	118.666666666667	56.6666666666667	3.1555	0.4292	1.3562	0.1343	0.1622	1.3625	1.64696666666667	0.553	-1.57445997075374	0.0652776731475546	0.712565337514838	no	-	--	-	-	-	-
Unigene0000862	151	80	5.7714	2.3617	5.9205	2.2842	2.1859	1.3350	4.68453333333333	1.93503333333333	-1.27554691699455	0.0116876183315796	0.412186530007563	no	-	--	-	-	-	-
Unigene0000863	17	8.66666666666667	0.0919	0.3701	0.7806	0.1718	0.2075	0.1527	0.4142	0.177333333333333	-1.22386380855312	0.133192225989787	0.863099937655126	no	-	--	-	-	-	-
Unigene0000864	1157	1669	15.1994	15.5729	17.2551	19.0203	18.2364	15.9113	16.0091333333333	17.7226666666667	0.146700488851799	0.660228932015279	1	no	ZFAND5	PREDICTED: AN1-type zinc finger protein 5-like isoform X1 [Sinocyclocheilus anshuiensis]	-	-	GO:0043167//ion binding;GO:0046914//transition metal ion binding;GO:0005488//binding;GO:0046872//metal ion binding;GO:0043169//cation binding	-
Unigene0000865	9.66666666666667	14	0.6092	0.2265	0.6654	0.6832	0.5044	0.4937	0.500366666666667	0.560433333333333	0.163557083110643	0.847787416764651	1	no	-	--	-	-	-	-
Unigene0000866	213	205	2.5451	4.6976	2.8653	2.5080	2.8670	2.0366	3.36933333333333	2.47053333333333	-0.447640642279135	0.302345308015249	0.995681774438294	no	-	--	-	-	-	-
Unigene0000867	52.3333333333333	32.6666666666667	2.7224	1.6532	0.8722	0.5202	0.4372	1.3350	1.74926666666667	0.764133333333333	-1.19485393678583	0.0578931612294121	0.684063729732101	no	-	--	-	-	-	-
Unigene0000868	170	121.333333333333	1.6956	2.5528	1.9693	1.0826	0.9072	1.3452	2.07256666666667	1.11166666666667	-0.898694247846557	0.0386360364744222	0.609306243483829	no	-	PREDICTED: uncharacterized protein LOC103909920 [Danio rerio]	-	-	-	-
Unigene0000869	46.6666666666667	70.3333333333333	0.8879	1.0316	0.8082	1.6320	0.6851	0.7195	0.909233333333333	1.0122	0.15477189868936	0.782325648054513	1	no	Sowahc	PREDICTED: ankyrin repeat domain-containing protein SOWAHD-like [Sinocyclocheilus rhinocerous]	-	-	-	-
Unigene0000870	0	1	0.0000	0.0000	0.0000	0.0560	0.0676	0.0560	0.001	0.0598666666666667	5.90368103913263	0.300478779299554	0.995628475983064	no	-	--	-	-	-	-
Unigene0000871	12.6666666666667	10.6666666666667	2.6512	1.5059	0.9653	0.5506	0.8870	1.6527	1.70746666666667	1.0301	-0.729073016265602	0.325428867147798	0.999845213278851	no	-	--	-	-	-	-
Unigene0000872	24.6666666666667	44	0.7832	1.0920	1.2119	1.6165	0.7738	1.7699	1.02903333333333	1.38673333333333	0.430400670308281	0.447434865271389	1	no	-	--	-	-	-	-
Unigene0000873	160.333333333333	283.666666666667	2.8417	2.3736	2.7962	3.1942	3.8013	3.8421	2.6705	3.61253333333333	0.435901015386819	0.27699371083886	0.984102981257738	no	-	PREDICTED: LOW QUALITY PROTEIN: scavenger receptor cysteine-rich domain-containing group B protein-like [Chrysemys picta bellii]	-	-	-	-
Unigene0000874	621	950.666666666667	6.7530	6.6063	12.8095	8.9621	10.7260	12.1658	8.72293333333333	10.6179666666667	0.283622248716784	0.47209504401921	1	no	-	--	-	-	-	-
Unigene0000875	7369	10124.3333333333	190.2888	323.9015	131.2193	363.5085	154.7244	123.9524	215.136533333333	214.061766666667	-0.00722539572561303	0.987167387703957	1	no	tmsb	PREDICTED: thymosin beta-4 [Pygocentrus nattereri]	ko04810//Regulation of actin cytoskeleton//Cell motility//Cellular Processes	GO:0005737//cytoplasm;GO:0044464//cell part;GO:0044424//intracellular part;GO:0005622//intracellular;GO:0005623//cell	GO:0005515//protein binding;GO:0005488//binding;GO:0008092//cytoskeletal protein binding	GO:0071840//cellular component organization or biogenesis;GO:0051494//negative regulation of cytoskeleton organization;GO:0050789//regulation of biological process;GO:0051128//regulation of cellular component organization;GO:0010639//negative regulation of organelle organization;GO:0030832//regulation of actin filament length;GO:0044763//single-organism cellular process;GO:0048523//negative regul…
Unigene0000876	68	136	1.4108	1.6456	1.7927	2.3958	3.1027	2.0693	1.61636666666667	2.5226	0.642156956131735	0.158243860637908	0.893923111231345	no	-	PREDICTED: oxysterol-binding protein-related protein 5 isoform X1 [Esox lucius]	-	-	-	-
Unigene0000877	162.333333333333	207.666666666667	14.1617	14.0584	12.8374	11.1646	16.0994	12.9117	13.6858333333333	13.3919	-0.0313226232403506	0.944151359320298	1	no	-	--	-	-	-	-
Unigene0000878	0.666666666666667	0.666666666666667	0.0000	0.0000	0.1978	0.0000	0.0000	0.1693	0.0659333333333333	0.0564333333333333	-0.224460452863469	1	1	no	-	PREDICTED: calcium/calmodulin-dependent protein kinase type IV-like [Pseudopodoces humilis]	ko04020//Calcium signaling pathway//Signal transduction//Environmental Information Processing	-	-	-
Unigene0000879	230.333333333333	362.666666666667	3.3776	3.8314	3.6759	4.3107	4.0462	4.6525	3.6283	4.33646666666667	0.25722627228553	0.504363621093203	1	no	-	ADP-ribosylation factor GTPase-activating protein 1-like [Scleropages formosus]	-	-	-	-
Unigene0000880	239.666666666667	317.666666666667	4.2902	4.7493	5.7740	5.2860	5.9147	4.1317	4.93783333333333	5.1108	0.0496709936988992	0.904514603592081	1	no	ALKBH4	PREDICTED: alpha-ketoglutarate-dependent dioxygenase alkB homolog 4-like [Sinocyclocheilus rhinocerous]	-	-	GO:0003824//catalytic activity	GO:0044699//single-organism process;GO:0008152//metabolic process;GO:0044710//single-organism metabolic process
Unigene0000881	10.6666666666667	14	0.8083	0.5259	0.8829	0.3022	0.9127	1.0581	0.739033333333333	0.757666666666667	0.0359238412169035	0.999999999999997	1	no	-	PREDICTED: uncharacterized protein si:ch211-12e13.10 [Danio rerio]	-	-	-	-
Unigene0000882	29	46.6666666666667	1.6805	1.8744	1.5663	2.6805	2.5301	1.0895	1.70706666666667	2.10003333333333	0.298892826095218	0.596662793068186	1	no	-	--	-	-	-	-
Unigene0000883	2591.66666666667	2963.33333333333	16.7912	14.7979	14.6829	11.9069	12.7576	15.2111	15.424	13.2918666666667	-0.21463323042354	0.500133988688046	1	no	CSNK1G1	PREDICTED: casein kinase I-like isoform X2 [Sinocyclocheilus grahami]	ko04340//Hedgehog signaling pathway//Signal transduction//Environmental Information Processing	GO:0005623//cell;GO:0005622//intracellular;GO:0044464//cell part;GO:0044424//intracellular part	GO:0097367//carbohydrate derivative binding;GO:0036094//small molecule binding;GO:0003824//catalytic activity;GO:0004672//protein kinase activity;GO:0032549//ribonucleoside binding;GO:0001882//nucleoside binding;GO:0016772//transferase activity, transferring phosphorus-containing groups;GO:1901363//heterocyclic compound binding;GO:0016301//kinase activity;GO:0005488//binding;GO:0016773//phosphotr…	GO:0044238//primary metabolic process;GO:0007154//cell communication;GO:0044700//single organism signaling;GO:0044237//cellular metabolic process;GO:0044763//single-organism cellular process;GO:0019538//protein metabolic process;GO:0007166//cell surface receptor signaling pathway;GO:0023052//signaling;GO:0006464//cellular protein modification process;GO:0065007//biological regulation;GO:0043412//…
Unigene0000884	506.666666666667	947.333333333333	4.5245	5.9121	8.3326	5.8120	13.9441	8.6627	6.2564	9.47293333333333	0.598478477789183	0.158336779763758	0.894138800641786	no	-	--	-	-	-	-
Unigene0000885	2	6.66666666666667	0.1441	0.4018	0.2098	0.9875	0.4339	0.4491	0.2519	0.6235	1.30753843798279	0.211207401105515	0.94051356554496	no	-	--	-	-	-	-
Unigene0000886	38	44.6666666666667	1.4223	2.0712	1.2773	1.7133	1.4990	1.0049	1.59026666666667	1.40573333333333	-0.177945764566313	0.733016769215601	1	no	-	--	-	-	-	-
Unigene0000887	11.6666666666667	14.3333333333333	1.3025	1.3451	1.6860	1.1722	1.6341	1.3532	1.44453333333333	1.3865	-0.0591558788230522	1	1	no	-	--	-	-	-	-
Unigene0000888	62.3333333333333	25.6666666666667	3.6492	0.6230	1.9251	0.4640	0.5606	0.8588	2.06576666666667	0.6278	-1.71830037348411	0.00865099897224989	0.37225417602438	no	-	--	-	-	-	-
Unigene0000889	3.33333333333333	12	0.4991	0.1856	0.2181	0.1866	0.7514	1.4312	0.300933333333333	0.789733333333333	1.39192166760316	0.15084185557275	0.886297288548633	no	-	--	-	-	-	-
Unigene0000890	13	11.6666666666667	1.6634	1.3082	1.3976	1.1161	0.4816	1.2762	1.4564	0.957966666666667	-0.60435928385161	0.357990327375078	1	no	-	--	-	-	-	-
Unigene0000891	1.66666666666667	5	0.0000	0.0978	0.3064	0.3933	0.4752	0.1967	0.134733333333333	0.355066666666667	1.39798310683088	0.261524088820816	0.97661717681488	no	-	--	-	-	-	-
Unigene0000892	51	51.6666666666667	3.1880	2.2051	4.2109	2.8640	2.6789	2.0797	3.20133333333333	2.54086666666667	-0.333352231661245	0.517132717965403	1	no	-	--	-	-	-	-
Unigene0000893	490.666666666667	385.666666666667	31.6596	29.0991	29.7279	14.2344	14.5435	24.5707	30.1622	17.7828666666667	-0.762253750226347	0.0513575115171964	0.661175502723255	no	-	--	-	-	-	-
Unigene0000894	64	78	1.4065	1.5252	1.8776	1.4788	1.5440	1.5161	1.6031	1.51296666666667	-0.0834842195962471	0.868086616372723	1	no	-	--	-	-	-	-
Unigene0000895	874	1026	10.8467	13.1103	9.1156	15.4753	7.2614	5.9241	11.0242	9.5536	-0.206557587690981	0.623200432462827	1	no	SERPINB1	PREDICTED: leukocyte elastase inhibitor-like [Sinocyclocheilus rhinocerous]	-	GO:0005576//extracellular region;GO:0044421//extracellular region part	-	-
Unigene0000896	151.333333333333	145.666666666667	16.0328	10.1567	9.9787	8.0362	8.9000	8.9893	12.0560666666667	8.64183333333333	-0.480349987322183	0.269235519443013	0.982790657306861	no	-	--	-	-	-	-
Unigene0000897	70.3333333333333	77.3333333333333	4.9071	3.8339	4.3499	2.7915	3.9615	4.2115	4.36363333333333	3.65483333333333	-0.255724261901779	0.592733869145004	1	no	-	--	-	-	-	-
Unigene0000898	684.666666666667	720	23.3669	18.7122	19.7963	15.1809	16.1909	17.7412	20.6251333333333	16.371	-0.333260996297351	0.344919442202769	1	no	-	--	-	-	-	-
Unigene0000899	22.6666666666667	12.3333333333333	2.2274	0.6901	1.1795	0.3364	0.6605	0.6732	1.36566666666667	0.5567	-1.29463340378068	0.0527862126469329	0.665925423147681	no	-	--	-	-	-	-
Unigene0000900	8217.66666666667	39913.6666666667	11.4433	170.3493	14.0730	514.9436	54.6714	87.6034	65.2885333333333	219.0728	1.74650883326603	0.0556600988105551	0.675449100242699	no	ITIH3	PREDICTED: inter-alpha-trypsin inhibitor heavy chain H3-like isoform X1 [Sinocyclocheilus anshuiensis]	-	-	-	-
Unigene0000901	13.3333333333333	6.66666666666667	1.2718	0.9735	0.4903	0.5127	0.2816	0.1865	0.911866666666667	0.326933333333333	-1.47982641033521	0.0521432814039497	0.664950649944074	no	-	PREDICTED: piggyBac transposable element-derived protein 3-like [Lates calcarifer]	-	-	-	-
Unigene0000902	13	15.6666666666667	1.1121	1.0337	0.4859	0.9239	0.3907	0.9243	0.877233333333333	0.7463	-0.233204946819291	0.796363727287543	1	no	-	--	-	-	-	-
Unigene0000903	3.66666666666667	3.66666666666667	0.8018	0.2484	0.2919	0.2498	0.3018	0.4165	0.447366666666667	0.3227	-0.471264187230558	0.661641506175092	1	no	-	--	-	-	-	-
Unigene0000904	18	26.3333333333333	0.3405	2.6373	2.1487	1.2021	3.1611	1.7687	1.70883333333333	2.04396666666667	0.258359974444244	0.728692514359613	1	no	-	--	-	-	-	-
Unigene0000905	7	11	0.9700	0.3756	0.2354	1.4605	0.1217	0.1008	0.527	0.561	0.0901978089715784	1	1	no	-	--	-	-	-	-
Unigene0000906	39.6666666666667	41	0.6281	0.9452	1.3939	1.1741	0.9231	0.3543	0.989066666666667	0.817166666666667	-0.275437411329962	0.645433914571292	1	no	-	--	-	-	-	-
Unigene0000907	35.3333333333333	33	1.1345	0.8627	1.1515	0.9853	0.7505	0.5143	1.04956666666667	0.750033333333333	-0.484767187968403	0.374136194033281	1	no	-	--	-	-	-	-
Unigene0000908	7	20.6666666666667	1.0076	0.8325	0.3261	2.0928	0.6742	1.6750	0.722066666666667	1.48066666666667	1.03604294324996	0.151904172649775	0.888186216670977	no	-	--	-	-	-	-
Unigene0000909	18.6666666666667	31.6666666666667	1.3836	1.0411	0.8636	1.1084	1.6863	1.3964	1.0961	1.39703333333333	0.349987018930711	0.540436295656944	1	no	-	--	-	-	-	-
Unigene0000910	1266.66666666667	1434.66666666667	11.7952	13.0812	12.0698	10.8289	11.5780	9.5460	12.3154	10.6509666666667	-0.20947911348749	0.529845065568805	1	no	cipc	PREDICTED: CLOCK-interacting pacemaker [Sinocyclocheilus rhinocerous]	-	-	-	-
Unigene0000911	43	15.6666666666667	5.8961	2.6457	3.1830	1.2034	1.7601	0.3169	3.90826666666667	1.09346666666667	-1.83761966601159	0.00575651172245188	0.3245707982656	no	-	--	-	-	-	-
Unigene0000912	13.6666666666667	48.3333333333333	0.5895	1.5828	0.2861	3.2646	2.0214	0.9799	0.819466666666667	2.08863333333333	1.34980207330297	0.053588116244079	0.668327867527083	no	Mpeg1	PREDICTED: macrophage-expressed gene 1 protein-like [Cyprinus carpio]	-	-	-	-
Unigene0000913	742.333333333333	1242.66666666667	7.9942	9.9021	13.3728	13.4827	16.4769	11.4897	10.4230333333333	13.8164333333333	0.406610041923008	0.269862306197218	0.98281593110894	no	Triobp	PREDICTED: TRIO and F-actin-binding protein-like isoform X2 [Danio rerio]	-	-	-	-
Unigene0000914	12	84.6666666666667	0.4443	0.4818	0.2696	3.8759	0.7805	1.3388	0.398566666666667	1.9984	2.32595241866451	0.000668482600081097	0.110940202248111	no	-	--	-	-	-	-
Unigene0000915	190	308.666666666667	22.2585	8.9651	10.9852	18.2345	16.7554	15.4684	14.0696	16.8194333333333	0.257547787096994	0.564845466538373	1	no	-	--	-	-	-	-
Unigene0000916	1598	2063	35.3746	36.4473	45.6767	34.7475	45.4736	38.0856	39.1662	39.4355666666667	0.00988821223722293	0.977293773523418	1	no	fam162b	PREDICTED: protein FAM162B-like [Sinocyclocheilus rhinocerous]	-	-	-	-
Unigene0000917	31.3333333333333	34.3333333333333	0.9717	0.8709	0.9855	0.4757	0.5224	1.3196	0.9427	0.772566666666667	-0.287139296016349	0.639377899824699	1	no	-	--	-	-	-	-
Unigene0000918	52	54.3333333333333	2.3513	2.2680	1.5506	2.9301	1.2023	0.5808	2.05663333333333	1.57106666666667	-0.388540204774275	0.527082598664593	1	no	-	--	-	-	-	-
Unigene0000919	103.333333333333	163.333333333333	2.4506	3.2313	2.1164	5.0423	2.1879	1.8474	2.59943333333333	3.02586666666667	0.219151261855539	0.665105668544854	1	no	-	--	-	-	-	-
Unigene0000920	37	59.6666666666667	2.9759	1.8859	1.8222	2.9919	2.4438	2.5296	2.228	2.6551	0.253016966124447	0.618788196404264	1	no	K02A2.6	Immunoglobulin superfamily member 21, partial [Larimichthys crocea]	-	-	-	-
Unigene0000921	11	25	0.5266	0.2797	0.3013	0.2344	1.0760	0.6331	0.3692	0.647833333333333	0.811220148859629	0.255359556039284	0.970585210458499	no	P2RX7	PREDICTED: P2X purinoceptor 7-like isoform X1 [Nothobranchius furzeri]	-	-	-	-
Unigene0000922	114.333333333333	127.666666666667	5.8133	3.9568	4.0997	3.3654	3.1356	4.9649	4.62326666666667	3.82196666666667	-0.274597382690759	0.54483079998275	1	no	-	PREDICTED: uncharacterized protein LOC107677180 isoform X3 [Sinocyclocheilus anshuiensis]	-	-	-	-
Unigene0000923	51	60	3.0713	1.5194	2.0921	2.4075	1.4170	1.9763	2.2276	1.9336	-0.204200819531429	0.703203001185769	1	no	-	--	-	-	-	-
Unigene0000924	291	375.333333333333	4.0843	3.2604	2.2685	3.1791	2.9822	2.9589	3.2044	3.04006666666667	-0.075951286873963	0.852286996970782	1	no	CAMK2G	PREDICTED: calcium/calmodulin-dependent protein kinase type II subunit gamma-like [Sinocyclocheilus anshuiensis]	ko04020//Calcium signaling pathway//Signal transduction//Environmental Information Processing;ko04261//Adrenergic signaling in cardiomyocytes//Circulatory system//Organismal Systems;ko04310//Wnt signaling pathway//Signal transduction//Environmental Information Processing;ko04916//Melanogenesis//Endocrine system//Organismal Systems;ko04912//GnRH signaling pathway//Endocrine system//Organismal Syst…	-	-	-
Unigene0000925	14	14	0.9388	1.2217	1.2305	1.2284	1.2721	0.1756	1.13033333333333	0.892033333333333	-0.341578757020537	0.665425764051293	1	no	-	--	-	-	-	-
Unigene0000926	20.6666666666667	16.6666666666667	1.0022	0.9936	1.5082	0.5412	0.6538	0.9996	1.168	0.731533333333333	-0.675044764838538	0.264499268774753	0.978510539244042	no	-	--	-	-	-	-
Unigene0000927	89.3333333333333	40	7.0053	6.1356	3.2371	1.3850	1.3183	2.5613	5.45933333333333	1.75486666666667	-1.63736336724425	0.00232834018013063	0.212586818607454	no	-	--	-	-	-	-
Unigene0000928	165.666666666667	190.666666666667	3.0939	4.8942	4.6790	4.6710	3.6502	2.9115	4.22236666666667	3.74423333333333	-0.173381522844105	0.693877835848896	1	no	-	--	-	-	-	-
Unigene0000929	14.3333333333333	15.3333333333333	0.6573	0.8146	0.5983	0.7167	0.5360	0.4098	0.690066666666667	0.554166666666667	-0.316415811202557	0.66378846337378	1	no	-	--	-	-	-	-
Unigene0000930	2085.33333333333	2248.33333333333	67.6552	67.2488	71.9774	42.1536	54.2048	73.4718	68.9604666666667	56.6100666666667	-0.284710914765677	0.404617840441217	1	no	Ppp3r1	PREDICTED: calcineurin subunit B type 1-like [Sinocyclocheilus anshuiensis]	ko04010//MAPK signaling pathway//Signal transduction//Environmental Information Processing;ko04020//Calcium signaling pathway//Signal transduction//Environmental Information Processing;ko04310//Wnt signaling pathway//Signal transduction//Environmental Information Processing;ko04114//Oocyte meiosis//Cell growth and death//Cellular Processes;ko04210//Apoptosis//Cell growth and death//Cellular Proce…	GO:0044422//organelle part;GO:0043229//intracellular organelle;GO:0043226//organelle;GO:0044428//nuclear part;GO:0005737//cytoplasm;GO:0043233//organelle lumen;GO:0070013//intracellular organelle lumen;GO:0032991//macromolecular complex;GO:0044446//intracellular organelle part;GO:0031981//nuclear lumen;GO:0043234//protein complex;GO:0005634//nucleus;GO:0044464//cell part;GO:0043227//membrane-boun…	GO:0042578//phosphoric ester hydrolase activity;GO:0043169//cation binding;GO:0003824//catalytic activity;GO:0016791//phosphatase activity;GO:0016788//hydrolase activity, acting on ester bonds;GO:0004721//phosphoprotein phosphatase activity;GO:0005515//protein binding;GO:0043167//ion binding;GO:0046872//metal ion binding;GO:0004722//protein serine/threonine phosphatase activity;GO:0005488//bindin…	GO:0050896//response to stimulus;GO:0044267//cellular protein metabolic process;GO:0032502//developmental process;GO:0002768//immune response-regulating cell surface receptor signaling pathway;GO:0006952//defense response;GO:0050794//regulation of cellular process;GO:0006913//nucleocytoplasmic transport;GO:0010638//positive regulation of organelle organization;GO:0042991//transcription factor imp…
Unigene0000931	142.333333333333	213.333333333333	1.2395	4.6892	2.1851	6.4087	1.4241	1.0844	2.7046	2.9724	0.136213033670256	0.842886726960866	1	no	LUM	zgc:86661, partial [Danio rerio]	-	-	-	GO:0009987//cellular process;GO:0009790//embryo development;GO:0007600//sensory perception;GO:0071840//cellular component organization or biogenesis;GO:0050877//neurological system process;GO:0050953//sensory perception of light stimulus;GO:0032502//developmental process;GO:0007275//multicellular organism development;GO:0048513//animal organ development;GO:0044767//single-organism developmental p…
Unigene0000932	23.3333333333333	36.3333333333333	1.7024	2.7427	2.3966	2.1921	3.0756	2.9715	2.28056666666667	2.7464	0.268149418011921	0.636481822462243	1	no	-	--	-	-	-	-
Unigene0000933	9.33333333333333	22	0.4987	0.5478	0.1320	0.8757	0.7508	0.3674	0.392833333333333	0.664633333333333	0.758641297526264	0.283424789720768	0.987021953743811	no	-	--	-	-	-	-
Unigene0000934	164	254.666666666667	1.7749	2.6097	1.8750	3.7345	2.0807	1.4691	2.08653333333333	2.4281	0.21871987093612	0.64087598213504	1	no	TAGAP	PREDICTED: T-cell activation Rho GTPase-activating protein-like isoform X1 [Sinocyclocheilus grahami]	-	GO:0044464//cell part;GO:0005623//cell	-	-
Unigene0000935	76.3333333333333	234.666666666667	1.8393	0.6007	0.9532	4.8627	1.1600	1.4461	1.13106666666667	2.4896	1.13822999911974	0.0629784469956518	0.704610155595749	no	Ovos	PREDICTED: alpha-2-macroglobulin-like [Sinocyclocheilus grahami]	-	GO:0005576//extracellular region	-	-
Unigene0000936	10.3333333333333	3.66666666666667	1.0310	0.6161	0.4290	0.0000	0.0554	0.4591	0.692033333333333	0.1715	-2.01263295377099	0.0519586376255006	0.664014395172522	no	-	--	-	-	-	-
Unigene0000937	369	671	9.6352	8.5858	9.1683	7.0836	12.1953	18.4795	9.12976666666667	12.5861333333333	0.463185237315637	0.268428194862856	0.981849217708703	no	ZBED9	PREDICTED: SCAN domain-containing protein 3-like [Sinocyclocheilus grahami]	-	-	-	-
Unigene0000938	133	151.333333333333	3.3654	3.8968	2.7828	3.9627	1.7605	2.6490	3.34833333333333	2.79073333333333	-0.262798883012132	0.576231580582246	1	no	-	--	-	-	-	-
Unigene0000939	25.3333333333333	41.6666666666667	0.9721	1.2321	0.7722	1.1013	0.7983	1.6802	0.992133333333333	1.19326666666667	0.266310563710549	0.639668318732044	1	no	-	--	-	-	-	-
Unigene0000940	184.666666666667	220.333333333333	2.0931	6.0722	6.5120	2.8454	6.9708	4.4481	4.89243333333333	4.75476666666667	-0.0411776474850365	0.936848416997781	1	no	-	--	-	-	-	-
Unigene0000941	32	56.6666666666667	0.4992	1.5982	0.3231	2.2117	0.4175	0.3803	0.806833333333333	1.00316666666667	0.314218722540478	0.690085306912094	1	no	PRDM1	PREDICTED: PR domain zinc finger protein 1-like isoform X3 [Cyprinus carpio]	-	-	-	-
Unigene0000942	4.66666666666667	4.66666666666667	0.2680	0.0830	0.6504	0.3339	0.2690	0.2227	0.3338	0.2752	-0.278503484660501	0.813761928624679	1	no	-	--	-	-	-	-
Unigene0000943	5	8.33333333333333	0.5240	0.0609	0.2861	0.4489	0.3944	0.2450	0.290333333333333	0.362766666666667	0.321331679758961	0.719219984325848	1	no	Dos	PREDICTED: voltage-dependent calcium channel beta subunit-associated regulatory protein-like [Sinocyclocheilus anshuiensis]	-	-	-	-
Unigene0000944	1166.66666666667	2342.66666666667	2.8511	3.2732	4.3525	4.5092	4.9166	6.8760	3.49226666666667	5.43393333333333	0.637833139639852	0.0721551251101583	0.73250338192172	no	NBEAL1	PREDICTED: neurobeachin-like protein 1 isoform X2 [Sinocyclocheilus grahami]	-	-	-	-
Unigene0000945	0.333333333333333	0.666666666666667	0.0000	0.1203	0.0000	0.1613	0.0000	0.0000	0.0401	0.0537666666666667	0.423109795979567	0.999999999999994	1	no	-	--	-	-	-	-
Unigene0000946	3520.66666666667	6939	19.8693	20.5631	26.6340	23.2256	47.6090	33.8701	22.3554666666667	34.9015666666667	0.642664135580904	0.0660982161376322	0.71507683126687	no	Gpat2	glycerol-3-phosphate acyltransferase 2, mitochondrial [Danio rerio]	ko01100//Metabolic pathways//Global and Overview//Metabolism;ko01110//Biosynthesis of secondary metabolites//Global and Overview//Metabolism;ko00564//Glycerophospholipid metabolism//Lipid metabolism//Metabolism;ko00561//Glycerolipid metabolism//Lipid metabolism//Metabolism	-	GO:0016747//transferase activity, transferring acyl groups other than amino-acyl groups;GO:0016740//transferase activity;GO:0016746//transferase activity, transferring acyl groups;GO:0003824//catalytic activity	GO:0044699//single-organism process;GO:0008152//metabolic process;GO:0044238//primary metabolic process;GO:0044710//single-organism metabolic process;GO:0071704//organic substance metabolic process;GO:0006629//lipid metabolic process
Unigene0000947	3	3	0.1571	0.1460	0.1144	0.0652	0.0788	0.1632	0.139166666666667	0.1024	-0.442597981527624	0.861499844338245	1	no	-	--	-	-	-	-
Unigene0000948	2890.66666666667	2604	175.5871	175.6308	183.6270	137.2733	111.5650	116.5933	178.281633333333	121.810533333333	-0.549519190486079	0.0822135706499934	0.75957580436295	no	-	--	-	-	-	-
Unigene0000949	34	26	1.6517	1.5847	1.5131	0.4648	0.9626	1.3285	1.58316666666667	0.918633333333333	-0.785252103147179	0.177457496130008	0.915442312848965	no	MYH6	Myosin-7 [Larimichthys crocea]	ko04261//Adrenergic signaling in cardiomyocytes//Circulatory system//Organismal Systems;ko04530//Tight junction//Cellular commiunity//Cellular Processes;ko04260//Cardiac muscle contraction//Circulatory system//Organismal Systems	GO:0015629//actin cytoskeleton;GO:0043226//organelle;GO:0005622//intracellular;GO:0043228//non-membrane-bounded organelle;GO:0005856//cytoskeleton;GO:0005623//cell;GO:0043229//intracellular organelle;GO:0044464//cell part;GO:0043232//intracellular non-membrane-bounded organelle;GO:0044424//intracellular part	GO:1901363//heterocyclic compound binding;GO:0016817//hydrolase activity, acting on acid anhydrides;GO:0016787//hydrolase activity;GO:0032549//ribonucleoside binding;GO:0097367//carbohydrate derivative binding;GO:0017111//nucleoside-triphosphatase activity;GO:0016818//hydrolase activity, acting on acid anhydrides, in phosphorus-containing anhydrides;GO:0005515//protein binding;GO:0003824//catalyt…	GO:0032502//developmental process;GO:0048856//anatomical structure development;GO:0044699//single-organism process;GO:0009790//embryo development;GO:0032501//multicellular organismal process;GO:0007275//multicellular organism development;GO:0044707//single-multicellular organism process;GO:0044767//single-organism developmental process
Unigene0000950	44	37.6666666666667	2.0647	2.0175	2.0045	1.7482	0.7572	1.3530	2.0289	1.28613333333333	-0.657657545103339	0.213760024216174	0.941620830560768	no	ZNF502	PREDICTED: gastrula zinc finger protein XlCGF26.1-like isoform X2 [Sinocyclocheilus anshuiensis]	-	-	-	-
Unigene0000951	35.3333333333333	48.3333333333333	1.3244	0.3637	1.0740	0.9752	1.0876	0.8444	0.9207	0.969066666666667	0.073864772325319	0.917013875546184	1	no	-	--	-	-	-	-
Unigene0000952	181	267.666666666667	10.6342	7.1647	8.8905	10.6573	10.7157	8.6283	8.89646666666667	10.0004333333333	0.168758143296627	0.678042772512782	1	no	-	--	-	-	-	-
Unigene0000953	22	25.6666666666667	1.4361	1.5402	3.0567	2.1337	2.3284	1.2395	2.011	1.90053333333333	-0.0815087528848666	0.88712720502223	1	no	-	--	-	-	-	-
Unigene0000954	105.333333333333	92.6666666666667	3.4568	4.2258	2.8181	2.8093	2.6870	1.4756	3.50023333333333	2.32396666666667	-0.59086172262706	0.212354201007806	0.940951019439416	no	-	--	-	-	-	-
Unigene0000955	86	127	2.1620	1.8947	2.7437	3.2137	2.7435	1.8483	2.2668	2.60183333333333	0.198871442168731	0.675818697200821	1	no	-	--	-	-	-	-
Unigene0000956	10	4	0.9469	0.1600	1.0655	0.4291	0.2592	0.0000	0.724133333333333	0.229433333333333	-1.6581803533095	0.0976399497015431	0.79465579668631	no	-	--	-	-	-	-
Unigene0000957	5663	6759	125.2623	108.6647	126.6679	97.7794	110.5923	120.1962	120.1983	109.522633333333	-0.134187451827183	0.661513760047807	1	no	mtpn	myotrophin [Danio rerio]	-	GO:0043232//intracellular non-membrane-bounded organelle;GO:0015629//actin cytoskeleton;GO:0043227//membrane-bounded organelle;GO:0005856//cytoskeleton;GO:0043005//neuron projection;GO:0043228//non-membrane-bounded organelle;GO:0043229//intracellular organelle;GO:0044444//cytoplasmic part;GO:0005622//intracellular;GO:0005623//cell;GO:0044424//intracellular part;GO:0044464//cell part;GO:0097458//n…	-	GO:0014896//muscle hypertrophy;GO:0051252//regulation of RNA metabolic process;GO:0065007//biological regulation;GO:0014897//striated muscle hypertrophy;GO:0003300//cardiac muscle hypertrophy;GO:0051171//regulation of nitrogen compound metabolic process;GO:0010604//positive regulation of macromolecule metabolic process;GO:0080090//regulation of primary metabolic process;GO:1903508//positive regul…
Unigene0000958	100.333333333333	99.3333333333333	2.1671	2.2043	1.1761	1.2611	1.2774	1.4784	1.84916666666667	1.33896666666667	-0.465755216224332	0.317806815923942	0.997188965256278	no	-	--	-	-	-	-
Unigene0000959	16.3333333333333	10.3333333333333	0.4751	0.4416	1.4271	0.0740	0.4471	0.7034	0.781266666666667	0.408166666666667	-0.936656693759906	0.263050653007946	0.978126068594919	no	-	--	-	-	-	-
Unigene0000960	23.6666666666667	31	1.1697	3.2615	3.3122	3.4009	2.1523	2.3494	2.58113333333333	2.6342	0.0293602169754566	0.975014552795994	1	no	-	--	-	-	-	-
Unigene0000961	15.3333333333333	57.6666666666667	0.0562	0.8099	0.2661	2.1192	0.6348	0.3855	0.3774	1.0465	1.47140598354263	0.0773400839494202	0.748287098260763	no	foxa1	hepatocyte nuclear factor 3-alpha [Danio rerio]	-	-	-	-
Unigene0000962	81.3333333333333	72.6666666666667	17.9348	7.7310	3.9746	13.5228	2.5436	2.0254	9.88013333333333	6.0306	-0.712228964517965	0.337342521938911	1	no	IGKV4-1	PREDICTED: polymeric immunoglobulin receptor-like [Sinocyclocheilus anshuiensis]	-	GO:0016020//membrane;GO:0031224//intrinsic component of membrane;GO:0044425//membrane part	-	-
Unigene0000963	49.6666666666667	47	1.3455	1.0875	1.3418	0.3827	0.8807	1.4587	1.25826666666667	0.907366666666667	-0.47168014108287	0.410815195528331	1	no	-	PREDICTED: uncharacterized protein LOC108257802 isoform X2 [Ictalurus punctatus]	-	-	-	-
Unigene0000964	46.6666666666667	34.6666666666667	9.1817	3.8671	4.9099	2.3241	3.0239	4.4716	5.98623333333333	3.2732	-0.870946756724731	0.120051852979368	0.8407331442315	no	-	--	-	-	-	-
Unigene0000965	1375.33333333333	1966.66666666667	24.6790	29.2521	29.7279	35.5859	29.8832	26.0945	27.8863333333333	30.5212	0.130253433216349	0.698007910334964	1	no	TIA1	TIA1 cytotoxic granule-associated RNA binding protein 1 [Danio rerio]	-	-	GO:0005488//binding;GO:0097159//organic cyclic compound binding	-
Unigene0000966	43.3333333333333	44.3333333333333	2.5075	1.0099	1.3389	1.3800	1.8246	0.5731	1.61876666666667	1.25923333333333	-0.36234941048958	0.544575927624877	1	no	-	--	-	-	-	-
Unigene0000967	57.3333333333333	47.6666666666667	8.4528	5.6119	6.2527	3.9291	4.2420	4.5165	6.77246666666667	4.2292	-0.679296600244426	0.166161760938112	0.902118009704904	no	-	--	-	-	-	-
Unigene0000968	193	218.333333333333	10.8495	8.6175	13.0712	10.3653	12.0280	6.5173	10.8460666666667	9.63686666666667	-0.170535893624585	0.697519764976344	1	no	-	--	-	-	-	-
Unigene0000969	3672	4149	105.3426	101.1656	113.9201	100.4130	95.9378	81.1458	106.809433333333	92.4988666666667	-0.207531476084697	0.502432808507911	1	no	tma7	PREDICTED: translation machinery-associated protein 7 [Cyprinodon variegatus]	-	-	-	-
Unigene0000970	33.3333333333333	31.3333333333333	2.6427	1.4605	2.1323	1.2905	1.9893	1.2466	2.0785	1.5088	-0.462141166836638	0.406175728096036	1	no	-	--	-	-	-	-
Unigene0000971	27.6666666666667	36.3333333333333	1.2779	0.9898	0.8685	1.2739	0.8016	0.9559	1.0454	1.01046666666667	-0.0490333336159796	0.953360764149979	1	no	-	--	-	-	-	-
Unigene0000972	1389.33333333333	1552	18.8876	16.4152	19.3559	14.1747	14.4345	17.8262	18.2195666666667	15.4784666666667	-0.235226084760829	0.483298829718942	1	no	ZNF180	PREDICTED: zinc finger and SCAN domain-containing protein 5A-like isoform X1 [Sinocyclocheilus anshuiensis]	-	-	-	-
Unigene0000973	22081.3333333333	34599	1231.9448	1214.3518	1619.2160	1526.9210	1877.2383	1569.2120	1355.17086666667	1657.79043333333	0.290786877403233	0.348213771898706	1	no	rpl35	PREDICTED: 60S ribosomal protein L35 isoform X1 [Cyprinus carpio]	ko03010//Ribosome//Translation//Genetic Information Processing	GO:0032991//macromolecular complex;GO:1990904//ribonucleoprotein complex;GO:0005622//intracellular;GO:0044464//cell part;GO:0030529//intracellular ribonucleoprotein complex;GO:0044424//intracellular part;GO:0005623//cell	-	GO:0043170//macromolecule metabolic process;GO:0007275//multicellular organism development;GO:0032502//developmental process;GO:0044707//single-multicellular organism process;GO:0009987//cellular process;GO:0008152//metabolic process;GO:0010467//gene expression;GO:0044767//single-organism developmental process;GO:0007049//cell cycle;GO:0071704//organic substance metabolic process;GO:0032501//mult…
Unigene0000974	9.66666666666667	10	0.7127	0.6624	0.8433	0.4996	0.7377	0.5553	0.739466666666667	0.597533333333333	-0.307465919728829	0.647414183013071	1	no	-	--	-	-	-	-
Unigene0000975	11.6666666666667	14	0.8378	1.4709	0.6101	1.1020	1.0511	0.4642	0.972933333333333	0.872433333333333	-0.157296060506236	0.867754935594449	1	no	-	--	-	-	-	-
Unigene0000976	3132.66666666667	4527	9.1410	9.7111	12.1191	11.3668	12.6534	10.7884	10.3237333333333	11.6028666666667	0.168516507825949	0.591850175341101	1	no	Ubr3	PREDICTED: E3 ubiquitin-protein ligase UBR3-like isoform X2 [Sinocyclocheilus anshuiensis]	-	-	GO:0043169//cation binding;GO:0046914//transition metal ion binding;GO:0046872//metal ion binding;GO:0043167//ion binding;GO:0005488//binding	GO:0044260//cellular macromolecule metabolic process;GO:0008152//metabolic process;GO:0043170//macromolecule metabolic process;GO:0032446//protein modification by small protein conjugation;GO:0009987//cellular process;GO:0019538//protein metabolic process;GO:0070647//protein modification by small protein conjugation or removal;GO:0044237//cellular metabolic process;GO:0006464//cellular protein mo…
Unigene0000977	534.666666666667	674.333333333333	5.5625	4.7757	5.2541	5.5467	5.2383	4.1986	5.19743333333333	4.99453333333333	-0.0574494625805656	0.8740764982479	1	no	Srm	spermidine synthase [Danio rerio]	ko01100//Metabolic pathways//Global and Overview//Metabolism;ko00480//Glutathione metabolism//Metabolism of other amino acids//Metabolism;ko00330//Arginine and proline metabolism//Amino acid metabolism//Metabolism;ko00270//Cysteine and methionine metabolism//Amino acid metabolism//Metabolism;ko00410//beta-Alanine metabolism//Metabolism of other amino acids//Metabolism	-	GO:0003824//catalytic activity	-
Unigene0000978	26	25.6666666666667	1.4062	0.4945	0.7472	1.0419	0.3147	0.5212	0.882633333333333	0.625933333333333	-0.495805225509659	0.462905648966214	1	no	-	--	-	-	-	-
Unigene0000979	1667.66666666667	2263.33333333333	29.1261	34.6173	32.9169	33.5296	37.0174	30.1957	32.2201	33.5809	0.0596799247140338	0.855139430141312	1	no	PTTG1IP	PREDICTED: pituitary tumor-transforming gene 1 protein-interacting protein-like [Sinocyclocheilus anshuiensis]	-	-	-	-
Unigene0000980	18	7.33333333333333	1.1662	1.3550	1.9107	1.0900	0.2926	0.0000	1.4773	0.460866666666667	-1.68054149847871	0.0611838939769711	0.696594665551892	no	-	--	-	-	-	-
Unigene0000981	7.66666666666667	10	0.3573	0.2906	0.2602	0.2783	0.0672	0.5012	0.3027	0.282233333333333	-0.101000286823641	0.943031289216025	1	no	-	PREDICTED: pleckstrin homology domain-containing family S member 1-like [Sinocyclocheilus grahami]	-	-	-	-
Unigene0000982	234.666666666667	200	9.2631	9.0278	9.2335	5.6875	7.7515	4.7092	9.1748	6.0494	-0.600884651121933	0.143840572889734	0.878346043872169	no	-	--	-	-	-	-
Unigene0000983	154	168	3.0588	2.4447	2.4117	2.4642	2.4199	1.6517	2.6384	2.1786	-0.276261967916104	0.516882572400041	1	no	-	--	-	-	-	-
Unigene0000984	6	12.3333333333333	0.9503	0.8832	0.1730	1.6282	0.1788	0.9626	0.668833333333333	0.9232	0.464996473699282	0.616856756492512	1	no	-	--	-	-	-	-
Unigene0000985	199.666666666667	475	1.8687	2.1802	1.1765	3.0260	3.4728	2.7424	1.7418	3.0804	0.822538723948757	0.0440632540839078	0.632641086588355	no	c3	PREDICTED: complement C3-like [Sinocyclocheilus rhinocerous]	ko04145//Phagosome//Transport and catabolism//Cellular Processes	-	-	GO:0019538//protein metabolic process;GO:0050789//regulation of biological process;GO:0065007//biological regulation;GO:0050896//response to stimulus;GO:0006955//immune response;GO:0044238//primary metabolic process;GO:0006950//response to stress;GO:0008152//metabolic process;GO:0006952//defense response;GO:0043170//macromolecule metabolic process;GO:0002376//immune system process;GO:0071704//org…
Unigene0000986	40	12	4.3662	1.3306	2.0327	0.4014	0.8621	0.4908	2.5765	0.584766666666667	-2.13947961139113	0.00124015577684048	0.154285309963592	no	-	--	-	-	-	-
Unigene0000987	82.3333333333333	98.6666666666667	2.2596	1.8960	2.5137	1.0950	2.2679	2.8171	2.2231	2.06	-0.109928508059089	0.83545371973768	1	no	-	PREDICTED: uncharacterized protein LOC109045355 [Cyprinus carpio]	-	-	-	-
Unigene0000988	215.333333333333	414.333333333333	2.4538	1.3382	1.4242	2.3300	2.6037	2.5287	1.73873333333333	2.48746666666667	0.516640507081196	0.209077029841544	0.939160111224158	no	Rasl10b	PREDICTED: ras-like protein family member 10B [Cyprinus carpio]	-	-	GO:0032550//purine ribonucleoside binding;GO:0032549//ribonucleoside binding;GO:0001882//nucleoside binding;GO:1901363//heterocyclic compound binding;GO:0097159//organic cyclic compound binding;GO:0001883//purine nucleoside binding;GO:0097367//carbohydrate derivative binding;GO:0036094//small molecule binding;GO:0005488//binding	GO:0009154//purine ribonucleotide catabolic process;GO:0050794//regulation of cellular process;GO:0044281//small molecule metabolic process;GO:0072521//purine-containing compound metabolic process;GO:0007154//cell communication;GO:0046700//heterocycle catabolic process;GO:0051716//cellular response to stimulus;GO:1901575//organic substance catabolic process;GO:0007165//signal transduction;GO:0009…
Unigene0000989	16	19	1.5102	1.0918	0.9775	0.9932	0.6947	1.4121	1.19316666666667	1.03333333333333	-0.207489864197132	0.742702301042576	1	no	tc1a	PREDICTED: forkhead box protein N1 isoform X1 [Oreochromis niloticus]	-	-	GO:0016757//transferase activity, transferring glycosyl groups;GO:0003824//catalytic activity;GO:0016740//transferase activity	-
Unigene0000990	8.66666666666667	12.3333333333333	0.9634	0.8954	0.4209	1.3205	0.2176	0.7207	0.7599	0.752933333333333	-0.0132874471735245	1	1	no	-	putative nuclease HARBI1, partial [Larimichthys crocea]	-	-	-	-
Unigene0000991	46	68.6666666666667	1.6304	0.9554	1.6260	1.3471	1.3874	2.0548	1.40393333333333	1.59643333333333	0.185377877594855	0.72645779150352	1	no	-	putative nuclease HARBI1, partial [Larimichthys crocea]	-	-	-	-
Unigene0000992	19.3333333333333	3.66666666666667	2.2828	0.2927	1.4330	0.2452	0.2370	0.0981	1.33616666666667	0.193433333333333	-2.78819164023031	0.00140550318419153	0.162759987760572	no	-	--	-	-	-	-
Unigene0000993	14	18	0.6712	1.4817	0.9164	0.8887	1.1368	0.9937	1.0231	1.0064	-0.0237433367692893	1	1	no	-	--	-	-	-	-
Unigene0000994	335	522.666666666667	13.0965	18.1939	10.5618	18.9230	14.5229	14.9234	13.9507333333333	16.1231	0.208788197885634	0.594094331422481	1	no	Tuba1a	PREDICTED: tubulin alpha-1 chain-like [Astyanax mexicanus]	ko04145//Phagosome//Transport and catabolism//Cellular Processes;ko04540//Gap junction//Cellular commiunity//Cellular Processes	GO:0043227//membrane-bounded organelle;GO:0043229//intracellular organelle;GO:0043232//intracellular non-membrane-bounded organelle;GO:0044446//intracellular organelle part;GO:0005856//cytoskeleton;GO:0005737//cytoplasm;GO:0044422//organelle part;GO:0043228//non-membrane-bounded organelle;GO:0099513//polymeric cytoskeletal fiber;GO:0099512//supramolecular fiber;GO:0005622//intracellular;GO:004446…	GO:0005515//protein binding;GO:0005198//structural molecule activity;GO:0001882//nucleoside binding;GO:0097367//carbohydrate derivative binding;GO:0016818//hydrolase activity, acting on acid anhydrides, in phosphorus-containing anhydrides;GO:0016787//hydrolase activity;GO:0003824//catalytic activity;GO:0001883//purine nucleoside binding;GO:0016462//pyrophosphatase activity;GO:0097159//organic cyc…	GO:0044710//single-organism metabolic process;GO:0009056//catabolic process;GO:0044712//single-organism catabolic process;GO:0032502//developmental process;GO:0043623//cellular protein complex assembly;GO:0034097//response to cytokine;GO:0044772//mitotic cell cycle phase transition;GO:1901565//organonitrogen compound catabolic process;GO:1901292//nucleoside phosphate catabolic process;GO:0051649/…
Unigene0000995	734	880	15.7161	13.1664	20.3807	12.3793	14.8376	18.5781	16.4210666666667	15.265	-0.105320254058768	0.776457092487828	1	no	POLR3GL	PREDICTED: DNA-directed RNA polymerase III subunit RPC7-like isoform X1 [Sinocyclocheilus grahami]	ko01100//Metabolic pathways//Global and Overview//Metabolism;ko00230//Purine metabolism//Nucleotide metabolism//Metabolism;ko00240//Pyrimidine metabolism//Nucleotide metabolism//Metabolism;ko04623//Cytosolic DNA-sensing pathway//Immune system//Organismal Systems;ko03020//RNA polymerase//Transcription//Genetic Information Processing	-	-	-
Unigene0000996	35.3333333333333	28	2.8460	1.8223	1.3816	0.4729	1.3806	1.6953	2.01663333333333	1.18293333333333	-0.769580025378872	0.205754749012163	0.936967250351197	no	-	--	-	-	-	-
Unigene0000997	288	361.666666666667	3.3081	4.2744	3.5754	4.2795	3.5734	2.7927	3.7193	3.54853333333333	-0.0678082624792766	0.865624749099917	1	no	mul1a	LOC402879 protein, partial [Danio rerio]	-	-	-	GO:0008152//metabolic process;GO:0036211//protein modification process;GO:0071840//cellular component organization or biogenesis;GO:0006996//organelle organization;GO:0019538//protein metabolic process;GO:0044238//primary metabolic process;GO:0016043//cellular component organization;GO:0044260//cellular macromolecule metabolic process;GO:0043412//macromolecule modification;GO:0043170//macromolecu…
Unigene0000998	2410	1967.33333333333	81.6638	63.8442	66.5746	42.7766	37.7098	49.0098	70.6942	43.1654	-0.711716498582728	0.0301945522072313	0.564568990305418	no	-	PREDICTED: small kinetochore-associated protein-like [Sinocyclocheilus grahami]	-	-	-	-
Unigene0000999	29.6666666666667	33	1.2337	1.5421	0.6505	1.1663	0.9287	0.6895	1.1421	0.928166666666667	-0.2992331838202	0.622550142501331	1	no	-	--	-	-	-	-
Unigene0001000	189.333333333333	296	17.8245	19.8809	26.0543	27.8879	27.1334	22.7164	21.2532333333333	25.9125666666667	0.285969582536379	0.482625951358914	1	no	-	--	-	-	-	-
Unigene0001001	50	41	0.9294	0.9903	1.0234	0.3955	0.7508	0.7207	0.981033333333333	0.622333333333333	-0.65661463511959	0.200344393240641	0.933956123708219	no	KCTD16	PREDICTED: BTB/POZ domain-containing protein KCTD16-like [Cyprinus carpio]	-	-	-	GO:1902578//single-organism localization;GO:0044765//single-organism transport;GO:0044699//single-organism process;GO:0051234//establishment of localization;GO:0006810//transport;GO:0051179//localization
Unigene0001002	329.666666666667	467	16.5245	21.8931	36.5628	32.9922	16.5625	33.0084	24.9934666666667	27.5210333333333	0.138983618674814	0.758022554092495	1	no	-	PREDICTED: uncharacterized protein LOC109096714 isoform X3 [Cyprinus carpio]	-	-	-	-
Unigene0001003	11.6666666666667	15.3333333333333	0.4850	0.6010	1.2360	0.5036	0.4868	1.4108	0.774	0.8004	0.0483876008739685	0.999999999999996	1	no	-	PREDICTED: uncharacterized protein LOC109096714 isoform X4 [Cyprinus carpio]	-	-	-	-
Unigene0001004	39.3333333333333	40.3333333333333	1.2061	1.7059	2.2910	1.9930	1.5000	0.7191	1.73433333333333	1.40403333333333	-0.304804019338556	0.595967800270782	1	no	-	--	-	-	-	-
Unigene0001005	27.3333333333333	33	1.6285	1.3623	2.6088	0.9639	0.4904	3.6546	1.86653333333333	1.70296666666667	-0.132311076688442	0.867640228639746	1	no	-	--	-	-	-	-
Unigene0001006	32	35.3333333333333	3.1963	1.7200	2.2049	1.8867	2.4694	1.6254	2.37373333333333	1.99383333333333	-0.251613052481667	0.64770593885838	1	no	-	--	-	-	-	-
Unigene0001007	167.333333333333	222	1.7522	1.7954	2.3609	2.1061	2.5445	1.5137	1.9695	2.05476666666667	0.0611451579985826	0.891298656235995	1	no	GABRD	PREDICTED: gamma-aminobutyric acid receptor subunit delta-like [Sinocyclocheilus anshuiensis]	ko04080//Neuroactive ligand-receptor interaction//Signaling molecules and interaction//Environmental Information Processing	GO:0016020//membrane;GO:0044425//membrane part;GO:0031224//intrinsic component of membrane	GO:0004872//receptor activity;GO:0022891//substrate-specific transmembrane transporter activity;GO:0005215//transporter activity;GO:0022892//substrate-specific transporter activity;GO:0060089//molecular transducer activity;GO:0015267//channel activity;GO:0022803//passive transmembrane transporter activity;GO:0099600//transmembrane receptor activity;GO:0022836//gated channel activity;GO:0022834//l…	GO:0006810//transport;GO:0051179//localization;GO:0006811//ion transport;GO:0009987//cellular process;GO:0044699//single-organism process;GO:0007154//cell communication;GO:0044765//single-organism transport;GO:1902578//single-organism localization;GO:0044763//single-organism cellular process;GO:0051234//establishment of localization
Unigene0001008	10.3333333333333	14.6666666666667	0.4355	0.2208	0.4036	0.6167	0.3577	0.1728	0.3533	0.3824	0.114188774090096	0.908798249399061	1	no	-	--	-	-	-	-
Unigene0001009	1916.66666666667	2099.33333333333	9.0587	7.7518	8.2280	5.7872	7.1159	7.9119	8.34616666666667	6.93833333333333	-0.266524577778764	0.417531064768878	1	no	XYLT2	PREDICTED: xylosyltransferase 2-like [Sinocyclocheilus anshuiensis]	ko01100//Metabolic pathways//Global and Overview//Metabolism;ko00534//Glycosaminoglycan biosynthesis - heparan sulfate / heparin//Glycan biosynthesis and metabolism//Metabolism;ko00532//Glycosaminoglycan biosynthesis - chondroitin sulfate / dermatan sulfate//Glycan biosynthesis and metabolism//Metabolism	-	GO:0003824//catalytic activity;GO:0008194//UDP-glycosyltransferase activity;GO:0016740//transferase activity;GO:0016757//transferase activity, transferring glycosyl groups	GO:0006022//aminoglycan metabolic process;GO:0006807//nitrogen compound metabolic process;GO:0044711//single-organism biosynthetic process;GO:0009058//biosynthetic process;GO:0043170//macromolecule metabolic process;GO:1901566//organonitrogen compound biosynthetic process;GO:0044710//single-organism metabolic process;GO:0008152//metabolic process;GO:1901576//organic substance biosynthetic process…
Unigene0001010	1421	1680	17.0548	12.4812	11.6097	9.7441	11.6823	14.7931	13.7152333333333	12.0731666666667	-0.183975036846622	0.601536624021856	1	no	-	PREDICTED: uncharacterized protein LOC101882312 [Danio rerio]	-	-	-	-
Unigene0001011	18.6666666666667	25.3333333333333	1.0731	0.7627	1.1951	1.1799	0.8078	1.1411	1.0103	1.04293333333333	0.0458631878352645	0.967626075742169	1	no	-	--	-	-	-	-
Unigene0001012	207.666666666667	351	6.2687	8.1276	7.1813	8.6077	9.5880	9.6573	7.19253333333333	9.28433333333333	0.368298318310625	0.344202757992309	1	no	lipB	hypothetical protein cypCar_00048681 [Cyprinus carpio]	ko01100//Metabolic pathways//Global and Overview//Metabolism;ko00785//Lipoic acid metabolism//Metabolism of cofactors and vitamins//Metabolism	GO:0043229//intracellular organelle;GO:0005623//cell;GO:0044464//cell part;GO:0043231//intracellular membrane-bounded organelle;GO:0043227//membrane-bounded organelle;GO:0043226//organelle;GO:0044424//intracellular part;GO:0005622//intracellular	GO:0016746//transferase activity, transferring acyl groups;GO:0016747//transferase activity, transferring acyl groups other than amino-acyl groups;GO:0003824//catalytic activity;GO:0016740//transferase activity	GO:0044237//cellular metabolic process;GO:0006633//fatty acid biosynthetic process;GO:0044249//cellular biosynthetic process;GO:0006082//organic acid metabolic process;GO:0008610//lipid biosynthetic process;GO:0044699//single-organism process;GO:1901576//organic substance biosynthetic process;GO:0072330//monocarboxylic acid biosynthetic process;GO:0008152//metabolic process;GO:0071704//organic su…
Unigene0001013	0	0.333333333333333	0.0000	0.0000	0.0000	0.0748	0.0000	0.0000	0.001	0.0249333333333333	4.64000386427912	1	1	no	-	--	-	-	-	-
Unigene0001014	509	678	5.6028	4.8900	3.6046	7.1431	3.0794	3.4345	4.69913333333333	4.55233333333333	-0.0457885041035997	0.91601499393342	1	no	Phactr2	PREDICTED: phosphatase and actin regulator 2 isoform X3 [Sinocyclocheilus rhinocerous]	-	-	-	-
Unigene0001015	6.66666666666667	17	0.2187	1.4232	0.3186	0.6815	1.8937	1.2273	0.6535	1.2675	0.95572660609527	0.259095741249709	0.973927586398477	no	Tf2-9	Pol polyprotein [Dicentrarchus labrax]	ko03013//RNA transport//Translation//Genetic Information Processing	-	-	-
Unigene0001016	1456	2585.33333333333	9.7141	7.9120	11.2299	10.8187	11.6790	16.7498	9.61866666666667	13.0825	0.443729431435663	0.2008528428603	0.934251170762477	no	Tf2-9	PREDICTED: LOW QUALITY PROTEIN: retrotransposon-like protein 1 [Maylandia zebra]	-	-	-	-
Unigene0001017	7.66666666666667	12	1.2106	1.1252	0.7713	0.8486	1.7087	1.1320	1.0357	1.22976666666667	0.247778433925376	0.768726447629568	1	no	Tf2-9	PREDICTED: RNA-directed DNA polymerase homolog, partial [Danio rerio]	-	-	-	-
Unigene0001018	189.333333333333	348	1.6908	1.9674	2.4077	3.0669	3.0264	2.5765	2.02196666666667	2.88993333333333	0.515276998435819	0.196106814048923	0.931144359928741	no	Tf2-6	Pol polyprotein [Dicentrarchus labrax]	-	-	-	-
Unigene0001019	132.333333333333	191	3.0970	2.6633	4.0254	1.9116	3.9436	5.1602	3.2619	3.6718	0.170774924394365	0.722198478433974	1	no	Tf2-6	Retrotransposable element Tf2 protein type 1 [Larimichthys crocea]	-	-	-	-
Unigene0001020	0.666666666666667	1.33333333333333	0.0000	0.0000	0.2287	0.0000	0.1182	0.2937	0.0762333333333333	0.1373	0.848837760456585	1	1	no	-	--	-	-	-	-
Unigene0001021	281.333333333333	414.666666666667	2.5522	2.8561	3.7076	2.0490	3.7086	4.7254	3.03863333333333	3.49433333333333	0.20159463933453	0.64027254805907	1	no	PEG10	Pol polyprotein [Dicentrarchus labrax]	-	-	-	-
Unigene0001022	4.33333333333333	8	0.7566	0.4220	0.5509	1.0371	0.6835	0.6603	0.5765	0.793633333333333	0.461152013645086	0.590304673437875	1	no	-	PREDICTED: copine-8-like [Sinocyclocheilus rhinocerous]	-	-	-	-
Unigene0001023	26.3333333333333	34.6666666666667	1.7478	1.9369	1.0769	1.3822	1.2651	1.9276	1.5872	1.52496666666667	-0.057706222824375	0.929186433668687	1	no	Tf2-8	Retrotransposable element Tf2 protein type 1 [Larimichthys crocea]	-	-	-	-
Unigene0001024	79.3333333333333	105	1.6074	1.4720	1.7729	1.5170	1.5303	1.8566	1.61743333333333	1.63463333333333	0.0152608102031154	0.980764998320019	1	no	Tf2-9	Retrotransposable element Tf2 protein type 1 [Larimichthys crocea]	ko03013//RNA transport//Translation//Genetic Information Processing	-	-	-
Unigene0001025	2857	3695	28.0333	29.4518	34.0664	32.3317	34.0669	25.3064	30.5171666666667	30.5683333333333	0.00241687187704468	0.994467889170153	1	no	-	PREDICTED: FHA domain-containing protein FhaA-like [Sinocyclocheilus grahami]	-	GO:0016020//membrane	-	GO:0022607//cellular component assembly;GO:0009966//regulation of signal transduction;GO:0048583//regulation of response to stimulus;GO:0007275//multicellular organism development;GO:0065007//biological regulation;GO:0048513//animal organ development;GO:0098609//cell-cell adhesion;GO:0070271//protein complex biogenesis;GO:0022037//metencephalon development;GO:0006461//protein complex assembly;GO:…
Unigene0001026	4	19.3333333333333	0.1744	0.6485	0.1270	2.1192	0.2626	0.8155	0.316633333333333	1.06576666666667	1.75100656941839	0.0581436962405801	0.685360073006826	no	-	--	-	-	-	-
Unigene0001027	24.3333333333333	51	0.2929	0.9334	1.2797	1.0950	1.1969	1.9042	0.835333333333333	1.3987	0.743662645472992	0.226279453405765	0.951386499178745	no	-	--	-	-	-	-
Unigene0001028	8.66666666666667	3.33333333333333	0.1957	0.1092	0.1425	0.0244	0.0589	0.0488	0.149133333333333	0.0440333333333333	-1.75993478981229	0.0385708741978292	0.609306243483829	no	-	PREDICTED: uncharacterized protein LOC109083040 [Cyprinus carpio]	-	-	-	-
Unigene0001029	2.33333333333333	2.33333333333333	0.4304	0.4000	0.1045	0.1788	0.2160	0.2683	0.311633333333333	0.221033333333333	-0.495585602822402	0.840931308701961	1	no	-	--	-	-	-	-
Unigene0001030	7	9.33333333333333	0.1992	0.3704	0.0725	0.2897	0.1250	0.1863	0.214033333333333	0.200333333333333	-0.0954330077651876	1	1	no	SYT14	PREDICTED: synaptotagmin-14-like [Sinocyclocheilus grahami]	-	-	-	-
Unigene0001031	2.66666666666667	2	0.1090	0.2027	0.0794	0.0000	0.0821	0.1359	0.130366666666667	0.0726666666666667	-0.843209401068659	0.570019260363971	1	no	-	--	-	-	-	-
Unigene0001032	4703	6263	79.6188	88.3437	94.1880	97.3223	85.5136	84.1931	87.3835	89.0096666666667	0.0266011331067739	0.930860601546523	1	no	txn	PREDICTED: thioredoxin-like [Sinocyclocheilus anshuiensis]	-	-	GO:0003824//catalytic activity;GO:0016491//oxidoreductase activity;GO:0015036//disulfide oxidoreductase activity;GO:0016667//oxidoreductase activity, acting on a sulfur group of donors	GO:0044281//small molecule metabolic process;GO:0009987//cellular process;GO:0018904//ether metabolic process;GO:0042592//homeostatic process;GO:0065007//biological regulation;GO:0044763//single-organism cellular process;GO:0019725//cellular homeostasis;GO:0008152//metabolic process;GO:0044699//single-organism process;GO:0044710//single-organism metabolic process;GO:0065008//regulation of biologi…
Unigene0001033	14.6666666666667	18.3333333333333	0.4419	0.5371	0.3465	0.2965	0.4861	0.4661	0.441833333333333	0.416233333333333	-0.0861097589111797	0.920965010184292	1	no	-	--	-	-	-	-
Unigene0001034	21	20	0.4703	0.7398	0.7376	0.5636	0.5447	0.3383	0.649233333333333	0.4822	-0.429105422574752	0.455732849411796	1	no	-	--	-	-	-	-
Unigene0001035	164	261	1.2898	1.2427	0.9048	1.9845	1.0123	1.0148	1.14576666666667	1.3372	0.222901988326953	0.618064750181728	1	no	Tf2-9	Pol polyprotein [Dicentrarchus labrax]	-	-	-	-
Unigene0001036	63.3333333333333	79	1.0531	1.4579	1.1911	1.1867	1.0289	1.2711	1.23403333333333	1.16223333333333	-0.086481627194031	0.869601892268823	1	no	CALB1	PREDICTED: calbindin-like [Sinocyclocheilus anshuiensis]	-	-	-	-
Unigene0001037	2250.33333333333	2482	16.2305	13.1514	13.4023	9.7525	10.6511	14.9647	14.2614	11.7894333333333	-0.274621237971075	0.412652614867109	1	no	cep162	PREDICTED: centrosomal protein of 162 kDa isoform X2 [Sinocyclocheilus rhinocerous]	-	-	-	-
Unigene0001038	10.3333333333333	21	0.1688	1.0982	0.2868	0.7713	0.5506	0.9821	0.517933333333333	0.768	0.568339900021267	0.448879358263355	1	no	-	PREDICTED: uncharacterized protein LOC107676182 [Sinocyclocheilus anshuiensis]	-	-	-	-
Unigene0001039	122.666666666667	125	5.4554	3.0700	3.5670	2.1273	3.8272	3.3776	4.0308	3.1107	-0.373826935232691	0.425212363326421	1	no	CEP128	PREDICTED: centrosomal protein of 128 kDa-like [Sinocyclocheilus rhinocerous]	-	-	-	-
Unigene0001040	3.33333333333333	8.33333333333333	0.0000	0.2023	0.2377	0.1356	0.4096	0.3731	0.146666666666667	0.3061	1.06146202183612	0.333231015290951	1	no	-	--	-	-	-	-
Unigene0001041	26.3333333333333	35.3333333333333	3.1989	2.7354	2.8883	1.8337	2.4080	4.6263	2.94086666666667	2.956	0.00740489284131021	1	1	no	-	--	-	-	-	-
Unigene0001042	2317.33333333333	1718.66666666667	46.3736	27.0883	41.8158	9.6392	11.8760	41.9850	38.4259	21.1667333333333	-0.860280415608006	0.0865090349849243	0.767489644197696	no	SPATA22	PREDICTED: spermatogenesis-associated protein 22-like [Sinocyclocheilus rhinocerous]	-	-	-	-
Unigene0001043	13402	21276.6666666667	296.4970	273.3713	390.7786	373.5963	466.3503	355.6378	320.215633333333	398.528133333333	0.315637828339804	0.316640093259563	0.997182210528705	no	rpl27	ribosomal protein L27, partial [Hypophthalmichthys nobilis]	ko03010//Ribosome//Translation//Genetic Information Processing	GO:0030529//intracellular ribonucleoprotein complex;GO:0005622//intracellular;GO:0032991//macromolecular complex;GO:0005623//cell;GO:0044464//cell part;GO:0044424//intracellular part;GO:1990904//ribonucleoprotein complex	-	GO:0043170//macromolecule metabolic process;GO:0008152//metabolic process;GO:0010467//gene expression;GO:0071704//organic substance metabolic process
Unigene0001044	32	34.3333333333333	0.7131	1.4652	0.9565	1.2862	0.7628	0.4913	1.04493333333333	0.846766666666667	-0.303374518142734	0.626924266660572	1	no	Cd22	PREDICTED: B-cell receptor CD22-like isoform X1 [Cyprinus carpio]	-	-	-	-
Unigene0001045	148.666666666667	270	1.4069	1.2714	4.3255	2.6785	2.9860	4.7140	2.3346	3.4595	0.567388154709937	0.287054272600494	0.988113390005764	no	SIGLEC14	PREDICTED: B-cell receptor CD22-like isoform X4 [Cyprinus carpio]	-	-	-	-
Unigene0001046	181.666666666667	281.333333333333	2.8717	3.9885	1.3340	3.9590	3.4290	1.8827	2.7314	3.09023333333333	0.17807517027256	0.717201687121002	1	no	CEACAM5	PREDICTED: titin-like [Sinocyclocheilus anshuiensis]	-	-	-	-
Unigene0001047	1691.66666666667	2170.33333333333	6.3786	7.3857	9.6131	8.6616	8.4109	6.3836	7.79246666666667	7.8187	0.00484867484130822	0.989631942654389	1	no	Arhgap39	PREDICTED: rho GTPase-activating protein 39-like [Sinocyclocheilus anshuiensis]	-	GO:0005623//cell;GO:0044464//cell part	-	GO:0044763//single-organism cellular process;GO:0044699//single-organism process;GO:0009987//cellular process;GO:0007154//cell communication
Unigene0001048	347	518.666666666667	2.7963	3.4621	3.5314	4.3353	3.6837	3.2071	3.26326666666667	3.74203333333333	0.197505523917128	0.600101554855381	1	no	Cdk14	PREDICTED: cyclin-dependent kinase 14 isoform X1 [Lates calcarifer]	-	-	-	-
Unigene0001049	15	12	0.8700	0.8087	1.3246	0.6899	0.4168	0.7396	1.0011	0.615433333333333	-0.701911601658422	0.264524066117803	0.978510539244042	no	-	--	-	-	-	-
Unigene0001050	42.3333333333333	39.6666666666667	2.3490	1.9473	2.6350	2.0174	1.8638	1.1477	2.31043333333333	1.6763	-0.462883096796509	0.377468906626943	1	no	-	--	-	-	-	-
Unigene0001051	16	4.66666666666667	2.0366	1.2906	0.7415	0.0000	0.2787	0.5771	1.35623333333333	0.285266666666667	-2.24922232512398	0.010517498953825	0.399228847850723	no	-	--	-	-	-	-
Unigene0001052	3.66666666666667	12.3333333333333	0.1285	0.9551	0.1871	1.0404	0.8702	1.2011	0.423566666666667	1.03723333333333	1.29207951215951	0.137625943755931	0.86963354096789	no	-	--	-	-	-	-
Unigene0001053	1456.66666666667	1637.66666666667	42.8593	31.5384	33.9857	25.1726	27.4139	38.6405	36.1278	30.409	-0.248611030505014	0.477432834964101	1	no	CHCHD7	PREDICTED: coiled-coil-helix-coiled-coil-helix domain-containing protein 7-like [Sinocyclocheilus rhinocerous]	-	-	-	-
Unigene0001054	20	40	0.6229	1.0422	0.5443	2.0959	0.0625	0.9579	0.736466666666667	1.03876666666667	0.496179490939913	0.554704718965032	1	no	-	RNA-directed DNA polymerase from mobile element jockey [Larimichthys crocea]	-	-	-	-
Unigene0001055	481.333333333333	698	6.0307	9.3657	8.1494	9.5410	9.3213	7.4126	7.8486	8.7583	0.1582155324643	0.672081040306704	1	no	NDUFV3	PREDICTED: fibrous sheath CABYR-binding protein-like isoform X3 [Sinocyclocheilus rhinocerous]	ko01100//Metabolic pathways//Global and Overview//Metabolism;ko00190//Oxidative phosphorylation//Energy metabolism//Metabolism	-	-	-
Unigene0001056	3	2.66666666666667	0.1883	0.2625	0.2742	0.2346	0.0709	0.1761	0.241666666666667	0.160533333333333	-0.590145603029962	0.716899105434798	1	no	BTN1A1	PREDICTED: E3 ubiquitin-protein ligase TRIM21-like isoform X2 [Sinocyclocheilus rhinocerous]	-	GO:0005623//cell;GO:0044464//cell part	GO:0046914//transition metal ion binding;GO:0043169//cation binding;GO:0043167//ion binding;GO:0005488//binding;GO:0046872//metal ion binding	-
Unigene0001057	2629.66666666667	2140.66666666667	429.9043	276.9838	225.4185	177.8893	183.5377	196.5039	310.768866666667	185.976966666667	-0.740718025487022	0.0344836340149183	0.587069935098672	no	-	--	-	-	-	-
Unigene0001058	1907	2074.33333333333	17.5827	14.0320	13.8628	13.6306	11.0308	12.2961	15.1591666666667	12.3191666666667	-0.299285779671703	0.362266977363831	1	no	Trim39	PREDICTED: E3 ubiquitin-protein ligase TRIM39-like isoform X1 [Sinocyclocheilus rhinocerous]	-	GO:0005623//cell;GO:0044464//cell part	GO:0005488//binding;GO:0043169//cation binding;GO:0043167//ion binding;GO:0046914//transition metal ion binding;GO:0046872//metal ion binding	-
Unigene0001059	0.333333333333333	2	0.0000	0.0000	0.1001	0.1714	0.0000	0.3429	0.0333666666666667	0.171433333333333	2.36116817951646	0.334629458215045	1	no	-	PREDICTED: S-antigen protein-like [Cavia porcellus]	-	-	-	-
Unigene0001060	2.33333333333333	6	0.0000	0.2474	0.4846	0.0829	0.3006	1.1615	0.244	0.515	1.07769128450769	0.429409194064132	1	no	-	--	-	-	-	-
Unigene0001061	10.6666666666667	20	1.6966	0.7359	0.8236	1.7618	1.1920	1.4807	1.08536666666667	1.47816666666667	0.445626438796817	0.499828226549624	1	no	-	--	-	-	-	-
Unigene0001062	300	474.333333333333	3.1868	3.8208	3.4613	3.6208	5.3321	3.8396	3.48963333333333	4.26416666666667	0.289188371586945	0.452135697798343	1	no	TRIB2	PREDICTED: tribbles homolog 2-like [Cyprinus carpio]	-	-	GO:0001882//nucleoside binding;GO:0016772//transferase activity, transferring phosphorus-containing groups;GO:0001883//purine nucleoside binding;GO:0036094//small molecule binding;GO:0003824//catalytic activity;GO:0032549//ribonucleoside binding;GO:0097367//carbohydrate derivative binding;GO:1901363//heterocyclic compound binding;GO:0097159//organic cyclic compound binding;GO:0016301//kinase acti…	GO:0008152//metabolic process;GO:0044238//primary metabolic process;GO:0044237//cellular metabolic process;GO:0044260//cellular macromolecule metabolic process;GO:0071704//organic substance metabolic process;GO:0044267//cellular protein metabolic process;GO:0019538//protein metabolic process;GO:0036211//protein modification process;GO:0009987//cellular process;GO:0043170//macromolecule metabolic …
Unigene0001063	12	15.3333333333333	0.8183	0.3803	0.8938	0.3824	1.2319	0.5526	0.697466666666667	0.7223	0.0504739010843149	1	1	no	-	--	-	-	-	-
Unigene0001064	9	3.33333333333333	1.3025	1.0761	1.0538	0.3607	0.2179	0.3609	1.14413333333333	0.313166666666667	-1.86925262255667	0.0174323990786982	0.471862905117924	no	-	--	-	-	-	-
Unigene0001065	7	10.6666666666667	0.6194	0.3598	0.4511	0.7719	0.4080	0.4344	0.476766666666667	0.5381	0.174590934070982	0.870255278938991	1	no	-	--	-	-	-	-
Unigene0001066	7007.66666666667	10300.3333333333	81.9988	79.0435	93.9722	89.9131	97.0203	101.0021	85.0048333333333	95.9785	0.175166391552249	0.563231198322845	1	no	SCCPDH	PREDICTED: saccharopine dehydrogenase-like oxidoreductase [Sinocyclocheilus anshuiensis]	-	-	GO:0003824//catalytic activity	GO:0008152//metabolic process;GO:0044699//single-organism process;GO:0044710//single-organism metabolic process
Unigene0001067	6.33333333333333	7.33333333333333	1.2366	0.1149	0.7203	0.4623	0.2793	1.0021	0.6906	0.581233333333333	-0.248732891276103	0.808147313453986	1	no	-	--	-	-	-	-
Unigene0001068	119.666666666667	203.333333333333	2.6824	2.2251	3.8434	5.1397	3.7996	2.6790	2.91696666666667	3.87276666666667	0.408895681845516	0.372245979875776	1	no	-	--	-	-	-	-
Unigene0001069	159	222.333333333333	4.4059	2.2129	4.5633	5.2176	3.9140	2.9171	3.72736666666667	4.01623333333333	0.107686342647425	0.816113011905703	1	no	-	--	-	-	-	-
Unigene0001070	19.3333333333333	20.3333333333333	2.6226	0.9603	0.6944	1.0894	0.4188	1.5853	1.42576666666667	1.03116666666667	-0.46746036412868	0.536013985085568	1	no	-	--	-	-	-	-
Unigene0001071	105.666666666667	129.666666666667	2.7220	3.6369	3.0226	3.3072	3.4833	2.0574	3.12716666666667	2.9493	-0.0844835323012153	0.85399736230865	1	no	-	--	-	-	-	-
Unigene0001072	0	0	0.0000	0.0000	0.0000	0.0000	0.0000	0.0000	0.001	0.001	0	notest	notest	notest	-	--	-	-	-	-
Unigene0001073	904.333333333333	1087	13.7586	11.5357	13.8102	13.2682	13.1622	9.6449	13.0348333333333	12.0251	-0.116323244919335	0.739869919216936	1	no	Clip1	PREDICTED: CAP-Gly domain-containing linker protein 1-like isoform X3 [Sinocyclocheilus grahami]	-	-	-	-
Unigene0001074	18	13.3333333333333	0.8145	0.9936	0.6302	0.5392	0.2299	0.5395	0.812766666666667	0.4362	-0.897851465275095	0.177964245075035	0.915634989884199	no	-	--	-	-	-	-
Unigene0001075	5.33333333333333	1.33333333333333	0.3884	0.0602	0.4242	0.0807	0.0000	0.0807	0.290933333333333	0.0538	-2.43501052304583	0.0424911506130446	0.625723644714453	no	-	--	-	-	-	-
Unigene0001076	15.3333333333333	13	1.5256	0.2363	1.5429	0.5809	0.5742	1.0039	1.1016	0.719666666666667	-0.614199721946252	0.418374836847975	1	no	-	--	-	-	-	-
Unigene0001077	59	29.6666666666667	2.5311	0.4103	1.6288	0.3301	0.9084	0.5504	1.5234	0.5963	-1.35318455894449	0.0425996444893614	0.626986019076105	no	-	PREDICTED: probable basic-leucine zipper transcription factor H [Oreochromis niloticus]	ko03460//Fanconi anemia pathway//Replication and repair//Genetic Information Processing	-	-	-
Unigene0001078	24	63	1.1907	0.3162	0.3716	0.5829	0.5762	2.2797	0.626166666666667	1.14626666666667	0.872324095436433	0.222362756464547	0.948180682197042	no	Klhdc8a	PREDICTED: kelch domain-containing protein 8A [Danio rerio]	-	-	-	-
Unigene0001079	77.3333333333333	262	10.1176	7.7728	3.9843	36.2798	6.9944	8.4952	7.29156666666667	17.2564666666667	1.24283636638763	0.0496367685161712	0.65511425891428	no	VMO1	PREDICTED: vitelline membrane outer layer protein 1 homolog [Sinocyclocheilus grahami]	-	-	-	-
Unigene0001080	509.666666666667	308.333333333333	19.2941	58.0196	3.6776	15.8400	13.3705	5.8014	26.9971	11.6706333333333	-1.2099215885383	0.0855662022373653	0.765776176262137	no	VMO1	PREDICTED: vitelline membrane outer layer protein 1-like [Sinocyclocheilus grahami]	-	-	-	-
Unigene0001081	175	241.666666666667	5.5753	10.0424	1.3112	9.0837	4.0666	3.1949	5.64296666666667	5.4484	-0.050621203316028	0.938957816062149	1	no	VMO1	PREDICTED: vitelline membrane outer layer protein 1-like [Sinocyclocheilus grahami]	-	-	-	-
Unigene0001082	130.333333333333	225.666666666667	26.3937	0.4824	1.5116	19.2628	10.8829	3.0041	9.46256666666667	11.0499333333333	0.223734201074811	0.822521758556521	1	no	VMO1	PREDICTED: vitelline membrane outer layer protein 1-like [Sinocyclocheilus grahami]	-	-	-	-
Unigene0001083	2.66666666666667	0.666666666666667	0.0000	0.1051	0.5765	0.0000	0.0851	0.0705	0.2272	0.0518666666666667	-2.13108327523965	0.281833530894256	0.985790527800067	no	-	--	-	-	-	-
Unigene0001084	176	290	1.7992	1.8927	1.3494	2.1682	2.2708	1.7932	1.68043333333333	2.0774	0.305945722778618	0.449663172678657	1	no	-	PREDICTED: RNA-directed DNA polymerase from mobile element jockey-like [Cyprinus carpio]	-	-	-	-
Unigene0001085	15	13.6666666666667	1.2852	1.3652	1.0027	0.6864	1.2439	0.6295	1.2177	0.853266666666667	-0.513090151318335	0.417642626120326	1	no	-	--	-	-	-	-
Unigene0001086	306	359.666666666667	4.0621	4.1033	4.0740	4.5843	2.7924	3.4113	4.0798	3.596	-0.18210540926587	0.644613342101602	1	no	ASAH1	PREDICTED: acid ceramidase-like isoform X2 [Sinocyclocheilus rhinocerous]	ko01100//Metabolic pathways//Global and Overview//Metabolism;ko04142//Lysosome//Transport and catabolism//Cellular Processes;ko00600//Sphingolipid metabolism//Lipid metabolism//Metabolism	-	GO:0003824//catalytic activity	GO:0044238//primary metabolic process;GO:0008152//metabolic process
Unigene0001087	1880.33333333333	3016	9.9105	20.6419	14.7643	27.7668	17.3188	10.2657	15.1055666666667	18.4504333333333	0.288574394321468	0.4889018853611	1	no	Slc31a1	PREDICTED: LOW QUALITY PROTEIN: high affinity copper uptake protein 1-like [Cyprinus carpio]	-	GO:0016020//membrane;GO:0044425//membrane part;GO:0031224//intrinsic component of membrane	GO:0015075//ion transmembrane transporter activity;GO:0022857//transmembrane transporter activity;GO:0022891//substrate-specific transmembrane transporter activity;GO:0005215//transporter activity;GO:0046915//transition metal ion transmembrane transporter activity;GO:0022890//inorganic cation transmembrane transporter activity;GO:0046873//metal ion transmembrane transporter activity;GO:0008324//c…	GO:0010035//response to inorganic substance;GO:0048545//response to steroid hormone;GO:0000041//transition metal ion transport;GO:0050896//response to stimulus;GO:0051179//localization;GO:0010033//response to organic substance;GO:0009628//response to abiotic stimulus;GO:0009719//response to endogenous stimulus;GO:0006811//ion transport;GO:0033993//response to lipid;GO:0010038//response to metal i…
Unigene0001088	0.666666666666667	0.333333333333333	0.0571	0.0000	0.0416	0.0356	0.0000	0.0000	0.0329	0.0118666666666667	-1.47117284349	0.99999999999999	1	no	-	--	-	-	-	-
Unigene0001089	764.333333333333	1765.66666666667	7.4436	10.0119	7.9452	18.3455	14.3523	11.7032	8.4669	14.8003333333333	0.805723913579284	0.0238550390211291	0.522420111620887	no	PROS1	PREDICTED: vitamin K-dependent protein S [Sinocyclocheilus rhinocerous]	-	-	GO:0046872//metal ion binding;GO:0043167//ion binding;GO:0005488//binding;GO:0043169//cation binding	-
Unigene0001090	921	1424.66666666667	2.9751	5.1451	5.0752	6.9748	5.6347	3.2830	4.39846666666667	5.2975	0.268311003832262	0.501122695853727	1	no	Phip	PREDICTED: PH-interacting protein isoform X1 [Sinocyclocheilus anshuiensis]	-	-	GO:1901363//heterocyclic compound binding;GO:0003676//nucleic acid binding;GO:0005488//binding;GO:0097159//organic cyclic compound binding	-
Unigene0001091	28.6666666666667	46.6666666666667	1.6695	0.4622	0.6466	0.4869	1.0963	1.7050	0.9261	1.09606666666667	0.243095662015571	0.71605266645664	1	no	-	--	-	-	-	-
Unigene0001092	3.66666666666667	3	0.4540	0.2813	0.6611	0.3771	0.1139	0.3773	0.465466666666667	0.289433333333333	-0.685446773051101	0.509620490789057	1	no	-	--	-	-	-	-
Unigene0001093	90	90.3333333333333	9.1026	5.9963	6.0490	5.5614	4.9228	5.2886	7.0493	5.2576	-0.423075618682699	0.360202295407395	1	no	-	--	-	-	-	-
Unigene0001094	44.6666666666667	60.6666666666667	1.3158	1.4221	0.9136	1.3156	1.0366	1.2971	1.21716666666667	1.21643333333333	-0.000869474355153873	1	1	no	-	PREDICTED: LOW QUALITY PROTEIN: protein FAM111A-like [Sinocyclocheilus grahami]	-	-	-	-
Unigene0001095	206	295	8.6554	7.7868	8.4258	8.4786	10.0345	8.7425	8.28933333333333	9.0852	0.132262195890465	0.739643762910313	1	no	-	PREDICTED: uncharacterized protein LOC100496506 [Xenopus tropicalis]	-	-	-	-
Unigene0001096	18.6666666666667	38.3333333333333	0.7365	0.5476	1.0368	0.4283	0.9609	2.2954	0.773633333333333	1.2282	0.666823645911645	0.321091387346747	0.998836782419472	no	-	--	-	-	-	-
Unigene0001097	7.33333333333333	14.3333333333333	0.8917	0.2072	0.3787	0.8334	0.6153	0.6485	0.492533333333333	0.699066666666667	0.505208679533919	0.511613902537967	1	no	-	--	-	-	-	-
Unigene0001098	11.6666666666667	15	0.9795	0.8346	0.7132	0.9663	0.8602	0.6106	0.842433333333333	0.812366666666667	-0.0524314782873066	1	1	no	-	--	-	-	-	-
Unigene0001099	9324.66666666667	9551.66666666667	115.8461	84.8517	85.7838	44.7133	64.9336	108.9851	95.4938666666667	72.8773333333333	-0.38993790520217	0.290180087686853	0.989898125245927	no	tmem214-b	PREDICTED: transmembrane protein 214 [Sinocyclocheilus rhinocerous]	-	-	-	-
Unigene0001100	7772.66666666667	10257.3333333333	29.0673	30.7156	34.7228	29.0219	33.5992	33.4655	31.5019	32.0288666666667	0.0239339039280738	0.937277970731955	1	no	baz1b	PREDICTED: tyrosine-protein kinase BAZ1B-like [Sinocyclocheilus anshuiensis]	-	-	-	-
Unigene0001101	1.66666666666667	1.66666666666667	0.0000	0.1564	0.1837	0.2096	0.0633	0.0000	0.113366666666667	0.0909666666666667	-0.317586611433705	1	1	no	-	--	-	-	-	-
Unigene0001102	18.3333333333333	35	1.8820	1.4451	0.7746	1.9374	1.9711	1.7853	1.36723333333333	1.89793333333333	0.473169841593717	0.422761235885685	1	no	-	--	-	-	-	-
Unigene0001103	13.6666666666667	14	1.4907	1.2790	1.3360	0.8574	1.3811	1.0008	1.36856666666667	1.07976666666667	-0.341946128739106	0.603891265137567	1	no	-	--	-	-	-	-
Unigene0001104	27.3333333333333	27	0.9687	1.5165	1.1509	0.6353	0.7676	1.3031	1.21203333333333	0.902	-0.42623003775338	0.457479418797803	1	no	-	--	-	-	-	-
Unigene0001105	439.666666666667	670.666666666667	15.9773	54.0650	5.9533	55.4907	12.4969	12.4108	25.3318666666667	26.7994666666667	0.0812508990808714	0.909075852742748	1	no	-	PREDICTED: small ubiquitin-related modifier 1-B-like [Clupea harengus]	-	-	-	-
Unigene0001106	193.666666666667	191	4.6433	3.4907	3.5136	1.3331	3.2040	4.1431	3.88253333333333	2.8934	-0.424232527478977	0.377367847259274	1	no	-	--	-	-	-	-
Unigene0001107	55.3333333333333	63.3333333333333	1.7257	1.7498	2.1133	1.7594	1.4761	1.6625	1.86293333333333	1.63266666666667	-0.190345773943519	0.697545983369993	1	no	-	--	-	-	-	-
Unigene0001108	64.6666666666667	50	2.7550	2.4123	1.7444	0.8458	0.8115	2.2152	2.3039	1.29083333333333	-0.835775360155366	0.133390443676806	0.863417053773628	no	-	--	-	-	-	-
Unigene0001109	212	328.333333333333	2.6598	2.6719	3.6209	3.5615	4.7879	2.6158	2.9842	3.65506666666667	0.29255349275385	0.486403884789028	1	no	FHDC1	PREDICTED: FH2 domain-containing protein 1-like [Sinocyclocheilus rhinocerous]	-	-	-	-
Unigene0001110	47.3333333333333	51	1.0287	0.6719	1.5993	0.8315	1.0464	0.9532	1.09996666666667	0.9437	-0.221059596817443	0.6694597048947	1	no	-	--	-	-	-	-
Unigene0001111	56.3333333333333	55	3.9181	3.6418	4.3389	4.1195	3.3795	1.4756	3.96626666666667	2.99153333333333	-0.406896540115419	0.444603572870165	1	no	-	--	-	-	-	-
Unigene0001112	20.6666666666667	10.6666666666667	3.3702	1.3574	1.5542	0.9099	0.5074	0.9104	2.09393333333333	0.7759	-1.43227287922774	0.0322945007810613	0.577534381832179	no	-	--	-	-	-	-
Unigene0001113	0	0.333333333333333	0.0000	0.0000	0.0000	0.0000	0.0000	0.0519	0.001	0.0173	4.11270013274936	1	1	no	-	--	-	-	-	-
Unigene0001114	78	97	3.5026	2.5461	3.1064	2.6021	3.8536	2.3514	3.0517	2.9357	-0.0559085974572695	0.914551396524701	1	no	-	--	-	-	-	-
Unigene0001115	213.333333333333	207.666666666667	13.5913	26.7364	12.5402	16.7625	10.7916	10.4454	17.6226333333333	12.6665	-0.476411586033655	0.30250252599382	0.995690113702734	no	-	PREDICTED: keratinocyte-associated transmembrane protein 2 [Sinocyclocheilus grahami]	-	-	-	-
Unigene0001116	24.3333333333333	23.6666666666667	1.9252	2.8119	3.7048	2.9131	2.6914	0.9429	2.81396666666667	2.18246666666667	-0.366645619581804	0.547260961733078	1	no	-	--	-	-	-	-
Unigene0001117	3158.33333333333	1792.66666666667	25.6727	8.5061	14.4277	3.6109	5.3870	11.2586	16.2021666666667	6.75216666666667	-1.26276433298183	0.00841559024548475	0.368007381384682	no	SLC24A4	PREDICTED: sodium/potassium/calcium exchanger 4-like isoform X3 [Sinocyclocheilus anshuiensis]	-	GO:0016020//membrane;GO:0044425//membrane part;GO:0031224//intrinsic component of membrane	-	GO:0009987//cellular process;GO:0044763//single-organism cellular process;GO:0044699//single-organism process
Unigene0001118	0	0	0.0000	0.0000	0.0000	0.0000	0.0000	0.0000	0.001	0.001	0	notest	notest	notest	-	--	-	-	-	-
Unigene0001119	27.3333333333333	22	0.5912	0.7632	0.9327	0.6344	0.3214	0.4504	0.762366666666667	0.468733333333333	-0.701717647200599	0.224854826732916	0.95074516706643	no	-	--	-	-	-	-
Unigene0001120	1272.66666666667	1556.66666666667	41.2660	34.2673	36.4539	37.6361	37.6099	28.9473	37.3290666666667	34.7311	-0.104071333253696	0.758517638153482	1	no	lamtor4	PREDICTED: ragulator complex protein LAMTOR4 [Sinocyclocheilus grahami]	-	GO:0012505//endomembrane system;GO:0000323//lytic vacuole;GO:0043226//organelle;GO:0044424//intracellular part;GO:0016020//membrane;GO:0044446//intracellular organelle part;GO:0044440//endosomal part;GO:0098805//whole membrane;GO:0005737//cytoplasm;GO:0044444//cytoplasmic part;GO:0043231//intracellular membrane-bounded organelle;GO:0031090//organelle membrane;GO:0043229//intracellular organelle;G…	GO:0005515//protein binding;GO:0005488//binding	GO:0065007//biological regulation;GO:0008104//protein localization;GO:0044699//single-organism process;GO:0023052//signaling;GO:0033036//macromolecule localization;GO:0051641//cellular localization;GO:0051179//localization;GO:1901700//response to oxygen-containing compound;GO:0009719//response to endogenous stimulus;GO:0031929//TOR signaling;GO:0010243//response to organonitrogen compound;GO:0044…
Unigene0001121	85.3333333333333	119	2.2782	1.8917	2.5215	1.8359	3.7500	1.8178	2.23046666666667	2.4679	0.145938349427886	0.773649924921285	1	no	-	--	-	-	-	-
Unigene0001122	17	15.6666666666667	0.7475	0.5095	0.9072	0.5900	0.5252	0.4349	0.7214	0.5167	-0.48147253936271	0.450219617486828	1	no	-	--	-	-	-	-
Unigene0001123	2467	2968	28.1230	29.8227	32.9745	21.6433	29.9255	32.6808	30.3067333333333	28.0832	-0.109931021012995	0.737525420305832	1	no	GMCL1	PREDICTED: germ cell-less protein-like 1 [Sinocyclocheilus rhinocerous]	-	-	-	-
Unigene0001124	46.3333333333333	65	1.1410	0.6128	1.2555	0.8847	1.1261	1.2645	1.0031	1.09176666666667	0.122199118377013	0.831995772291891	1	no	Tf2-9	PREDICTED: adhesion G protein-coupled receptor E1-like [Danio rerio]	ko03013//RNA transport//Translation//Genetic Information Processing	-	-	-
Unigene0001125	21	30	0.6231	0.9773	0.5671	1.3830	0.7622	0.1699	0.7225	0.7717	0.0950425181326591	0.911770222657465	1	no	-	--	-	-	-	-
Unigene0001126	24.3333333333333	18.6666666666667	1.5619	2.0199	0.8901	1.3540	0.4601	0.6350	1.49063333333333	0.816366666666667	-0.868636244942051	0.176391935503067	0.914029901044622	no	-	PREDICTED: uncharacterized protein LOC109091437 isoform X3 [Cyprinus carpio]	-	-	-	-
Unigene0001127	18.3333333333333	33.3333333333333	2.2164	0.9810	1.8444	2.3674	1.8273	2.6975	1.6806	2.2974	0.451025676775654	0.444482274085052	1	no	-	PREDICTED: myosin-IIIa-like [Sinocyclocheilus rhinocerous]	-	-	-	-
Unigene0001128	1148.33333333333	1427.66666666667	28.1876	20.1748	20.9239	23.5212	19.3630	21.3701	23.0954333333333	21.4181	-0.108777111071644	0.752611637584243	1	no	-	PREDICTED: RNA-directed DNA polymerase from mobile element jockey-like, partial [Cynoglossus semilaevis]	-	-	-	-
Unigene0001129	206.333333333333	237.666666666667	16.6020	7.3904	10.7920	6.4997	9.4808	13.9179	11.5948	9.96613333333333	-0.218372154426523	0.644338935494359	1	no	-	PREDICTED: myosin-IIIa-like [Sinocyclocheilus rhinocerous]	-	-	-	-
Unigene0001130	206.666666666667	257.333333333333	23.9547	10.6304	14.8854	13.5226	14.1682	18.0764	16.4901666666667	15.2557333333333	-0.112254449205865	0.804388711669798	1	no	-	PREDICTED: myosin-IIIa-like [Sinocyclocheilus rhinocerous]	-	-	-	-
Unigene0001131	36.6666666666667	37.6666666666667	2.3004	2.7395	1.9368	1.4333	2.1105	1.8821	2.32556666666667	1.80863333333333	-0.362682339877354	0.492093177206033	1	no	-	--	-	-	-	-
Unigene0001132	43.6666666666667	9.33333333333333	5.1052	1.5281	3.3393	0.7009	0.4559	0.4315	3.3242	0.529433333333333	-2.65048624879334	6.56049745778742e-05	0.0270974230234394	yes	-	--	-	-	-	-
Unigene0001133	58.3333333333333	84.3333333333333	1.3352	1.8138	1.9694	2.0265	1.5721	2.0701	1.70613333333333	1.88956666666667	0.147325023034999	0.764637090632817	1	no	-	PREDICTED: GRIP and coiled-coil domain-containing protein 2-like [Sinocyclocheilus grahami]	-	-	-	-
Unigene0001134	4	4.33333333333333	0.3331	0.0774	0.4244	0.2075	0.3134	0.2076	0.2783	0.242833333333333	-0.19667443710089	0.89269123031669	1	no	-	--	-	-	-	-
Unigene0001135	395	421	9.8282	9.1351	11.5421	7.8599	8.5036	8.6856	10.1684666666667	8.3497	-0.284305878906432	0.443020245751243	1	no	NKTR	Nktr protein, partial [Danio rerio]	-	-	GO:0016859//cis-trans isomerase activity;GO:0003824//catalytic activity;GO:0016853//isomerase activity	-
Unigene0001136	34.6666666666667	26	3.1716	2.0455	0.9898	1.3309	0.8770	1.0894	2.06896666666667	1.0991	-0.912587748228757	0.129370729646168	0.85768314936739	no	-	--	-	-	-	-
Unigene0001137	158.333333333333	181.333333333333	4.7966	6.8451	7.9027	7.0640	6.1273	4.2888	6.5148	5.8267	-0.161041857315757	0.711325109439733	1	no	-	--	-	-	-	-
Unigene0001138	274.333333333333	192.666666666667	9.9882	11.9023	14.0984	8.2020	9.7937	2.1393	11.9963	6.71166666666667	-0.837846534708134	0.109104440944082	0.82017920551655	no	-	--	-	-	-	-
Unigene0001139	4.66666666666667	11.6666666666667	0.2616	0.3242	0.4445	1.0868	0.5252	0.3806	0.343433333333333	0.6642	0.951587650009479	0.268167360083368	0.98175838183251	no	-	--	-	-	-	-
Unigene0001140	22	9	2.8610	0.7387	1.1574	0.4457	0.4786	0.4954	1.5857	0.473233333333333	-1.74449625001328	0.0130785448597821	0.429718724733606	no	-	--	-	-	-	-
Unigene0001141	0	0	0.0000	0.0000	0.0000	0.0000	0.0000	0.0000	0.001	0.001	0	notest	notest	notest	-	--	-	-	-	-
Unigene0001142	461.666666666667	357	19.4783	10.5305	8.1173	7.0402	7.6847	6.8170	12.7087	7.18063333333333	-0.82363346076931	0.0511388758995341	0.66067054930085	no	-	hypothetical protein cypCar_00037063 [Cyprinus carpio]	-	-	-	-
Unigene0001143	42	36.3333333333333	0.9984	1.3471	1.1726	0.7224	0.8485	0.7629	1.1727	0.777933333333333	-0.592115559687583	0.241926221500594	0.959969853924484	no	-	--	-	-	-	-
Unigene0001144	20.3333333333333	18	3.7792	1.2159	2.7518	2.0830	1.9695	1.1779	2.5823	1.74346666666667	-0.56669783470631	0.377128845225832	1	no	-	--	-	-	-	-
Unigene0001145	0	0	0.0000	0.0000	0.0000	0.0000	0.0000	0.0000	0.001	0.001	0	notest	notest	notest	-	--	-	-	-	-
Unigene0001146	131	175.666666666667	10.0589	11.8538	9.0902	8.1139	11.4931	11.8690	10.3343	10.492	0.0218490424553658	0.964236495956151	1	no	-	--	-	-	-	-
Unigene0001147	3.33333333333333	8.66666666666667	0.4494	0.4177	0.1636	0.7000	0.5920	0.6303	0.343566666666667	0.640766666666667	0.899209028322901	0.272109756878325	0.98363640335749	no	-	--	-	-	-	-
Unigene0001148	821.333333333333	416.333333333333	4.7336	2.4412	3.5995	0.7218	1.0562	2.2909	3.59143333333333	1.3563	-1.40488341197748	0.0027929178844165	0.231753956993291	no	Pol	pol-like protein [Danio rerio]	-	-	-	-
Unigene0001149	47.6666666666667	15.6666666666667	3.0609	1.6414	2.6146	0.5868	0.4431	0.7706	2.43896666666667	0.600166666666667	-2.02283494216293	0.00041794289010119	0.0819686308595979	no	-	--	-	-	-	-
Unigene0001150	231	218.666666666667	10.8858	7.7518	8.1504	5.9621	5.9476	7.0595	8.92933333333333	6.32306666666667	-0.497928036815522	0.219017335430399	0.946155526119215	no	-	--	-	-	-	-
Unigene0001151	40	45.6666666666667	4.5421	1.0163	3.2461	2.6728	1.7729	3.0411	2.93483333333333	2.4956	-0.233891861704067	0.715214859178952	1	no	-	--	-	-	-	-
Unigene0001152	8.66666666666667	7.66666666666667	0.4056	0.5385	0.3797	0.2166	0.0872	0.5417	0.441266666666667	0.281833333333333	-0.646808516171143	0.444007614156562	1	no	-	--	-	-	-	-
Unigene0001153	65.3333333333333	72.6666666666667	3.6197	5.9812	4.1586	4.4605	3.2092	3.8108	4.5865	3.82683333333333	-0.261242569780723	0.59403332314419	1	no	-	--	-	-	-	-
Unigene0001154	452	661.333333333333	2.4740	3.5470	3.4028	4.9166	3.5299	2.1571	3.14126666666667	3.53453333333333	0.170173327016002	0.679081069940603	1	no	HIP1R	PREDICTED: huntingtin-interacting protein 1-related protein [Sinocyclocheilus rhinocerous]	-	-	GO:0005488//binding;GO:0008289//lipid binding	-
Unigene0001155	615.666666666667	795	14.3363	12.2300	12.9952	13.9799	11.1245	13.2981	13.1871666666667	12.8008333333333	-0.0428968945072619	0.904846957066645	1	no	STX8	PREDICTED: syntaxin-8-like isoform X1 [Sinocyclocheilus rhinocerous]	ko04130//SNARE interactions in vesicular transport//Folding, sorting and degradation//Genetic Information Processing	-	-	-
Unigene0001156	62.3333333333333	62.3333333333333	4.0580	2.6193	2.6676	4.0384	1.5274	1.2648	3.11496666666667	2.27686666666667	-0.452166915304469	0.429974423325944	1	no	-	--	-	-	-	-
Unigene0001157	5.66666666666667	6	0.1593	0.2962	1.6242	0.2978	0.8396	0.7946	0.693233333333333	0.644	-0.106280338169882	1	1	no	-	--	-	-	-	-
Unigene0001158	14.6666666666667	22	0.7233	0.9168	0.8618	0.8604	1.5839	0.5329	0.833966666666667	0.9924	0.250932014385044	0.72983089833218	1	no	-	--	-	-	-	-
Unigene0001159	25.6666666666667	122.666666666667	0.0338	1.9488	0.3447	5.3728	1.6801	0.9908	0.775766666666667	2.68123333333333	1.78920208254533	0.054576805800404	0.670821196268852	no	-	--	-	-	-	-
Unigene0001160	46	29.6666666666667	2.3672	1.7602	3.6936	0.5900	1.7310	1.7286	2.607	1.34986666666667	-0.949573671033388	0.10389809840229	0.808312138874503	no	-	--	-	-	-	-
Unigene0001161	90.3333333333333	115	2.6540	2.8888	2.6954	3.1549	2.7076	2.1116	2.74606666666667	2.65803333333333	-0.0470074534418433	0.922829880580608	1	no	-	--	-	-	-	-
Unigene0001162	2029.33333333333	1549	70.1750	32.1635	39.5657	25.7456	23.3926	30.5808	47.3014	26.573	-0.831921771951171	0.0279200060656079	0.54991062353286	no	-	--	-	-	-	-
Unigene0001163	98.6666666666667	90	3.4226	4.7330	2.7961	1.8984	3.9902	1.8213	3.65056666666667	2.56996666666667	-0.506370779360017	0.316620470348418	0.997182210528705	no	-	PREDICTED: large proline-rich protein BAG6-like [Cyprinus carpio]	-	-	-	-
Unigene0001164	128.666666666667	146.666666666667	5.5234	3.0106	3.2026	2.5492	4.5685	3.0180	3.9122	3.37856666666667	-0.211568802823794	0.650870892190301	1	no	-	PREDICTED: adhesion G protein-coupled receptor E1-like [Danio rerio]	-	-	-	-
Unigene0001165	208.333333333333	207.333333333333	3.0555	2.2518	4.2391	1.6559	2.7220	3.0994	3.18213333333333	2.49243333333333	-0.352439370263456	0.432415318970858	1	no	Tf2-8	Retrotransposable element Tf2 protein type 1 [Larimichthys crocea]	ko03013//RNA transport//Translation//Genetic Information Processing	-	-	-
Unigene0001166	713.333333333333	1118.33333333333	11.1166	10.5803	13.2785	12.7260	15.2031	14.4884	11.6584666666667	14.1391666666667	0.278319036878198	0.422661135797586	1	no	GTF3C5	PREDICTED: general transcription factor 3C polypeptide 5 [Sinocyclocheilus rhinocerous]	-	-	-	-
Unigene0001167	4	12.6666666666667	0.4768	0.5540	0.2604	0.8170	1.9742	0.3716	0.4304	1.05426666666667	1.29248984603438	0.13181747067743	0.860733755970813	no	-	--	-	-	-	-
Unigene0001168	617.666666666667	714	22.7987	26.7834	25.8429	21.2637	25.7254	20.1899	25.1416666666667	22.393	-0.167032471026995	0.637831556509299	1	no	HSBP1	PREDICTED: heat shock factor-binding protein 1-like [Sinocyclocheilus grahami]	-	-	-	-
Unigene0001169	16	29.6666666666667	0.5260	0.4513	0.6777	0.6303	1.1270	0.6811	0.551666666666667	0.8128	0.559103590911379	0.352218515327166	1	no	-	PREDICTED: docking protein 1-like [Cyprinus carpio]	-	-	-	-
Unigene0001170	11	31	0.2046	0.8081	0.4469	1.1790	0.9240	1.0202	0.486533333333333	1.04106666666667	1.09745190197841	0.0916363432325061	0.781720818186214	no	-	--	-	-	-	-
Unigene0001171	10.3333333333333	17.3333333333333	0.1905	0.4131	0.9708	0.4747	1.0992	0.6728	0.5248	0.7489	0.513005369708331	0.53780799192307	1	no	-	--	-	-	-	-
Unigene0001172	7.33333333333333	11.6666666666667	0.2222	0.3442	0.1618	0.5306	0.0557	0.2308	0.242733333333333	0.272366666666667	0.166177911242863	0.897886776434516	1	no	Ephb2	PREDICTED: ephrin type-B receptor 2 isoform X1 [Danio rerio]	-	-	-	-
Unigene0001173	17.3333333333333	13.6666666666667	1.8535	0.8958	0.7558	0.6005	0.2790	1.0630	1.16836666666667	0.6475	-0.851541006072554	0.236732090706534	0.957878416370176	no	-	--	-	-	-	-
Unigene0001174	45.3333333333333	46	1.6016	3.6643	2.0633	2.9553	0.9738	1.5360	2.44306666666667	1.8217	-0.423407838814324	0.470304000537653	1	no	-	--	-	-	-	-
Unigene0001175	50	57.3333333333333	1.8055	1.1188	2.1911	1.2749	1.8725	1.4756	1.70513333333333	1.541	-0.146017693712169	0.785182976049513	1	no	-	--	-	-	-	-
Unigene0001176	0.333333333333333	5.66666666666667	0.0000	0.0000	0.0413	0.3889	0.2136	0.0354	0.0137666666666667	0.212633333333333	3.94911659175996	0.0224936555621485	0.511709250569084	no	-	--	-	-	-	-
Unigene0001177	37.3333333333333	591	1.9816	0.5716	0.8956	13.6025	27.4416	1.4269	1.1496	14.157	3.62231170528803	9.81127178912948e-06	0.00604291195839282	yes	pxn1	PREDICTED: fucolectin-4-like [Sinocyclocheilus grahami]	-	-	-	-
Unigene0001178	14.6666666666667	200	1.3404	0.0859	0.4375	6.4797	12.3865	0.5474	0.621266666666667	6.4712	3.38074871072441	0.000499177683318569	0.0911633755872448	no	-	--	-	-	-	-
Unigene0001179	113.333333333333	183.333333333333	1.7072	1.0151	1.0695	1.0559	1.6064	1.9172	1.26393333333333	1.5265	0.272307219546979	0.554197833696741	1	no	TBX18	PREDICTED: T-box transcription factor TBX18-like isoform X2 [Sinocyclocheilus rhinocerous]	-	GO:0043231//intracellular membrane-bounded organelle;GO:0043226//organelle;GO:0044424//intracellular part;GO:0005622//intracellular;GO:0043227//membrane-bounded organelle;GO:0044464//cell part;GO:0043229//intracellular organelle;GO:0005623//cell	GO:0003676//nucleic acid binding;GO:1901363//heterocyclic compound binding;GO:0005488//binding;GO:0097159//organic cyclic compound binding	GO:0043170//macromolecule metabolic process;GO:0006807//nitrogen compound metabolic process;GO:0006139//nucleobase-containing compound metabolic process;GO:0034645//cellular macromolecule biosynthetic process;GO:0090304//nucleic acid metabolic process;GO:1901360//organic cyclic compound metabolic process;GO:0016070//RNA metabolic process;GO:0044260//cellular macromolecule metabolic process;GO:003…
Unigene0001180	4	9	0.4058	0.0000	0.0985	0.1124	0.5091	0.2249	0.1681	0.282133333333333	0.747057402156701	0.514790425971173	1	no	-	PREDICTED: Hermansky-Pudlak syndrome 5 protein [Callorhinchus milii]	-	-	-	-
Unigene0001181	10.6666666666667	8.66666666666667	0.8331	1.5488	0.3370	0.8652	0.3484	0.3462	0.9063	0.519933333333333	-0.801662034293441	0.341499161429418	1	no	-	--	-	-	-	-
Unigene0001182	6	8	0.7112	0.5288	0.9321	0.8862	0.6424	0.7093	0.724033333333333	0.745966666666667	0.0430550472518027	1	1	no	-	PREDICTED: neuron navigator 3-like [Poecilia mexicana]	ko03013//RNA transport//Translation//Genetic Information Processing	-	-	-
Unigene0001183	428.666666666667	442	9.2154	7.0624	6.0009	4.1273	5.4851	7.4328	7.42623333333333	5.68173333333333	-0.386299523975205	0.333273074763176	1	no	fuz	PREDICTED: protein fuzzy homolog [Sinocyclocheilus rhinocerous]	-	-	-	-
Unigene0001184	1826	2171	10.0048	12.9417	12.6953	9.5880	11.2088	11.7815	11.8806	10.8594333333333	-0.129658875253214	0.69342014647543	1	no	Sp4	PREDICTED: LOW QUALITY PROTEIN: transcription factor Sp4-like [Cyprinus carpio]	-	-	GO:0097159//organic cyclic compound binding;GO:0005488//binding	-
Unigene0001185	0	0	0.0000	0.0000	0.0000	0.0000	0.0000	0.0000	0.001	0.001	0	notest	notest	notest	-	novel protein similar to DNA polymerases [Danio rerio]	-	-	-	-
Unigene0001186	500.666666666667	843.666666666667	18.4065	12.8112	23.8168	25.5752	23.6133	23.0290	18.3448333333333	24.0725	0.392012180262306	0.298443053151528	0.99475846914744	no	-	--	-	-	-	-
Unigene0001187	25.6666666666667	33.3333333333333	0.9196	0.6246	0.8241	0.7052	0.9052	0.7496	0.789433333333333	0.786666666666667	-0.00506498366796388	1	1	no	-	--	-	-	-	-
Unigene0001188	25.3333333333333	28.6666666666667	1.8684	2.2851	2.2914	2.2671	2.7390	0.7356	2.1483	1.9139	-0.166680021036289	0.787296216934684	1	no	-	--	-	-	-	-
Unigene0001189	0.333333333333333	2.33333333333333	0.1593	0.0000	0.0000	0.0000	0.7196	0.0993	0.0531	0.272966666666667	2.36194102100738	0.221715547791299	0.94789707258403	no	-	--	-	-	-	-
Unigene0001190	1.66666666666667	1.66666666666667	0.0000	0.5652	0.1107	0.1894	0.1144	0.1895	0.2253	0.164433333333333	-0.454344526962095	0.821039167223725	1	no	-	--	-	-	-	-
Unigene0001191	172.666666666667	143	3.8092	3.4394	4.7946	2.6616	1.6795	3.2226	4.0144	2.52123333333333	-0.671054733956272	0.130421004949356	0.859209141209944	no	-	PREDICTED: myosin-IIIa-like [Sinocyclocheilus rhinocerous]	-	-	-	-
Unigene0001192	22	34	1.1791	0.7828	0.5519	0.5510	1.2362	1.1025	0.837933333333333	0.963233333333333	0.201049851903821	0.741857748067651	1	no	-	--	-	-	-	-
Unigene0001193	4	3	0.1576	0.1465	0.1148	0.1228	0.0000	0.0983	0.139633333333333	0.0737	-0.921906859050294	0.381724854834738	1	no	-	--	-	-	-	-
Unigene0001194	498	500	6.2767	4.8429	4.8175	5.3075	4.1046	2.6211	5.31236666666667	4.01106666666667	-0.405368781938283	0.308202106537693	0.996829675044774	no	Irf2	PREDICTED: interferon regulatory factor 2-like [Sinocyclocheilus anshuiensis]	-	-	-	-
Unigene0001195	42.3333333333333	33	1.0101	1.0730	2.8720	1.1388	0.4707	1.4392	1.6517	1.01623333333333	-0.70071998067012	0.26840184497601	0.981849217708703	no	-	--	-	-	-	-
Unigene0001196	1980.33333333333	1589.33333333333	63.8614	49.7535	23.5442	22.5486	27.8115	29.3150	45.7197	26.5583666666667	-0.783649513012731	0.0487451993235874	0.651232278757294	no	QRICH2	PREDICTED: neurofilament heavy polypeptide-like [Sinocyclocheilus anshuiensis]	-	-	-	-
Unigene0001197	0	0	0.0000	0.0000	0.0000	0.0000	0.0000	0.0000	0.001	0.001	0	notest	notest	notest	-	--	-	-	-	-
Unigene0001198	43	84.6666666666667	0.8203	0.6671	0.8064	1.0094	1.0806	1.3423	0.7646	1.1441	0.581436051026008	0.221887413786821	0.948050173968171	no	-	--	-	-	-	-
Unigene0001199	334.666666666667	465.666666666667	0.8199	1.1486	1.3711	1.6058	1.1782	0.8339	1.1132	1.20596666666667	0.11547721741994	0.782392582637643	1	no	LRRK2	PREDICTED: leucine-rich repeat serine/threonine-protein kinase 2-like [Sinocyclocheilus rhinocerous]	-	GO:0044464//cell part;GO:0005623//cell	GO:0097159//organic cyclic compound binding;GO:0097367//carbohydrate derivative binding;GO:0016301//kinase activity;GO:0032550//purine ribonucleoside binding;GO:0032549//ribonucleoside binding;GO:0016740//transferase activity;GO:0001882//nucleoside binding;GO:0003824//catalytic activity;GO:0036094//small molecule binding;GO:0004672//protein kinase activity;GO:0001883//purine nucleoside binding;GO…	GO:0009987//cellular process;GO:0007154//cell communication;GO:0043170//macromolecule metabolic process;GO:0043412//macromolecule modification;GO:0044260//cellular macromolecule metabolic process;GO:0044237//cellular metabolic process;GO:0007165//signal transduction;GO:0035556//intracellular signal transduction;GO:0044238//primary metabolic process;GO:0071704//organic substance metabolic process;…
Unigene0001200	17613.6666666667	20297.3333333333	196.8106	210.7569	234.4214	144.6369	227.2193	202.6561	213.9963	191.5041	-0.160210572810618	0.612181686086373	1	no	Cct7	PREDICTED: T-complex protein 1 subunit eta-like [Sinocyclocheilus anshuiensis]	-	GO:0005622//intracellular;GO:0005623//cell;GO:0044424//intracellular part;GO:0044464//cell part	GO:0097367//carbohydrate derivative binding;GO:0097159//organic cyclic compound binding;GO:0001883//purine nucleoside binding;GO:0005488//binding;GO:0001882//nucleoside binding;GO:1901363//heterocyclic compound binding;GO:0005515//protein binding;GO:0036094//small molecule binding;GO:0032550//purine ribonucleoside binding;GO:0032549//ribonucleoside binding	GO:0043170//macromolecule metabolic process;GO:0044267//cellular protein metabolic process;GO:0044260//cellular macromolecule metabolic process;GO:0009987//cellular process;GO:0071704//organic substance metabolic process;GO:0044237//cellular metabolic process;GO:0008152//metabolic process;GO:0019538//protein metabolic process;GO:0044238//primary metabolic process
Unigene0001201	17.6666666666667	24.3333333333333	2.1713	1.6995	1.4978	1.2104	1.9785	2.3508	1.78953333333333	1.84656666666667	0.0452619323177947	0.967402873347652	1	no	-	--	-	-	-	-
Unigene0001202	2663.66666666667	3198	10.7745	10.6111	9.9532	8.6509	9.5937	10.2384	10.4462666666667	9.49433333333333	-0.13784883077381	0.659333719921619	1	no	ago3	PREDICTED: protein argonaute-3 isoform X2 [Esox lucius]	-	GO:0032991//macromolecular complex;GO:0005622//intracellular;GO:0031332//RNAi effector complex;GO:0044424//intracellular part;GO:0005623//cell;GO:0044464//cell part;GO:0030529//intracellular ribonucleoprotein complex;GO:1990904//ribonucleoprotein complex	GO:0003723//RNA binding;GO:1901363//heterocyclic compound binding;GO:0097159//organic cyclic compound binding;GO:0005488//binding;GO:0003676//nucleic acid binding	GO:0060255//regulation of macromolecule metabolic process;GO:1901576//organic substance biosynthetic process;GO:0019538//protein metabolic process;GO:0044763//single-organism cellular process;GO:0071704//organic substance metabolic process;GO:0051172//negative regulation of nitrogen compound metabolic process;GO:0010467//gene expression;GO:0065007//biological regulation;GO:0032269//negative regul…
Unigene0001203	415.333333333333	568.333333333333	4.6853	6.2411	5.2370	5.9036	5.9756	5.0042	5.3878	5.6278	0.0628747615311578	0.866026733266526	1	no	ago3	PREDICTED: protein argonaute-3-like isoform X1 [Clupea harengus]	-	GO:0032991//macromolecular complex;GO:1990904//ribonucleoprotein complex;GO:0030529//intracellular ribonucleoprotein complex;GO:0044424//intracellular part;GO:0005623//cell;GO:0044464//cell part;GO:0005622//intracellular;GO:0031332//RNAi effector complex	GO:0005488//binding;GO:0003723//RNA binding;GO:0097159//organic cyclic compound binding;GO:0003676//nucleic acid binding;GO:1901363//heterocyclic compound binding	GO:0044237//cellular metabolic process;GO:0043170//macromolecule metabolic process;GO:0043603//cellular amide metabolic process;GO:0065007//biological regulation;GO:0010556//regulation of macromolecule biosynthetic process;GO:0044249//cellular biosynthetic process;GO:0051246//regulation of protein metabolic process;GO:0051248//negative regulation of protein metabolic process;GO:0009892//negative …
Unigene0001204	2.66666666666667	1.33333333333333	0.4361	0.1351	0.4234	0.2717	0.0000	0.0906	0.331533333333333	0.120766666666667	-1.45693162534947	0.284245217070003	0.9871540011502	no	Prkag2	PREDICTED: 5'-AMP-activated protein kinase subunit gamma-2 isoform X2 [Lepisosteus oculatus]	ko04068//FoxO signaling pathway//Signal transduction//Environmental Information Processing;ko04910//Insulin signaling pathway//Endocrine system//Organismal Systems;ko04920//Adipocytokine signaling pathway//Endocrine system//Organismal Systems	-	-	-
Unigene0001205	0.666666666666667	2	0.0518	0.0481	0.0000	0.1613	0.0390	0.0000	0.0333	0.0667666666666667	1.00360583802029	0.801216837000835	1	no	-	--	-	-	-	-
Unigene0001206	3.66666666666667	7.33333333333333	0.3707	0.1378	0.2159	0.7853	0.0558	0.1849	0.241466666666667	0.342	0.502172279544247	0.70751284922824	1	no	-	--	-	-	-	-
Unigene0001207	23.3333333333333	108	0.0388	0.9558	0.2119	3.1795	0.2045	0.5685	0.402166666666667	1.3175	1.71193754702998	0.0845372004764183	0.763105054086083	no	myadm	PREDICTED: myeloid-associated differentiation marker-like [Sinocyclocheilus anshuiensis]	-	-	-	-
Unigene0001208	136	138	2.5204	2.2429	1.7181	1.3365	1.5743	1.9723	2.16046666666667	1.6277	-0.408508149884454	0.35438962789112	1	no	TPH1	PREDICTED: tryptophan 5-hydroxylase 1 isoform X1 [Sinocyclocheilus rhinocerous]	ko01100//Metabolic pathways//Global and Overview//Metabolism;ko00380//Tryptophan metabolism//Amino acid metabolism//Metabolism	-	GO:0016714//oxidoreductase activity, acting on paired donors, with incorporation or reduction of molecular oxygen, reduced pteridine as one donor, and incorporation of one atom of oxygen;GO:0004497//monooxygenase activity;GO:0046872//metal ion binding;GO:0046914//transition metal ion binding;GO:0005488//binding;GO:0043168//anion binding;GO:0036094//small molecule binding;GO:0031406//carboxylic ac…	GO:0042428//serotonin metabolic process;GO:0008152//metabolic process;GO:0006725//cellular aromatic compound metabolic process;GO:0044699//single-organism process;GO:0006807//nitrogen compound metabolic process;GO:1901564//organonitrogen compound metabolic process;GO:0006520//cellular amino acid metabolic process;GO:0044237//cellular metabolic process;GO:0044238//primary metabolic process;GO:0046…
Unigene0001209	7	11.3333333333333	0.3734	0.9545	0.4079	0.1163	1.0541	0.9893	0.5786	0.7199	0.315230195060032	0.749325645944563	1	no	PLAU	PREDICTED: urokinase-type plasminogen activator-like [Sinocyclocheilus anshuiensis]	-	-	GO:0004175//endopeptidase activity;GO:0016787//hydrolase activity;GO:0008233//peptidase activity;GO:0016740//transferase activity;GO:0070011//peptidase activity, acting on L-amino acid peptides;GO:0003824//catalytic activity;GO:0016772//transferase activity, transferring phosphorus-containing groups	GO:0016485//protein processing;GO:0006793//phosphorus metabolic process;GO:0006508//proteolysis;GO:0019538//protein metabolic process;GO:0006796//phosphate-containing compound metabolic process;GO:0009987//cellular process;GO:0044237//cellular metabolic process;GO:0031638//zymogen activation;GO:0010467//gene expression;GO:0071704//organic substance metabolic process;GO:0043170//macromolecule meta…
Unigene0001210	20.3333333333333	66	1.4263	2.8074	0.4887	6.6912	2.0210	1.9874	1.57413333333333	3.56653333333333	1.17996471108267	0.0967483170515361	0.792890100340487	no	-	PREDICTED: uncharacterized protein LOC107552172 isoform X1 [Sinocyclocheilus grahami]	-	-	-	-
Unigene0001211	11.6666666666667	17	0.8459	0.4163	0.3261	0.2790	0.4870	0.8996	0.529433333333333	0.5552	0.0685585375694765	0.960970293680561	1	no	Tf2-6	PREDICTED: uncharacterized mitochondrial protein AtMg00860-like [Sinocyclocheilus anshuiensis]	-	-	-	-
Unigene0001212	326	414.666666666667	2.3146	2.5525	3.2994	2.2855	3.0713	2.7757	2.72216666666667	2.71083333333333	-0.00601898307127164	0.988885468463796	1	no	RUNX1T1	PREDICTED: protein CBFA2T1 isoform X1 [Sinocyclocheilus anshuiensis]	-	-	-	-
Unigene0001213	212.333333333333	118.333333333333	24.5982	11.2479	9.9636	3.5482	6.2516	8.7763	15.2699	6.19203333333333	-1.30220547117895	0.0115046052164423	0.410179562541085	no	-	--	-	-	-	-
Unigene0001214	61.3333333333333	46.3333333333333	1.6631	2.1868	2.5106	1.2131	1.9237	0.7080	2.12016666666667	1.2816	-0.726231626892593	0.17479235991165	0.912105281688519	no	-	--	-	-	-	-
Unigene0001215	0	1.66666666666667	0.0000	0.0000	0.0000	0.0969	0.0000	0.1455	0.001	0.0808	6.33628338786443	0.191303067997415	0.927452202481662	no	-	PREDICTED: uncharacterized protein LOC107656688 [Sinocyclocheilus anshuiensis]	-	-	-	-
Unigene0001216	1118.33333333333	1679.33333333333	4.4807	4.8659	5.2108	5.7308	5.9055	5.1694	4.85246666666667	5.6019	0.207197927385211	0.533787660565306	1	no	GLTSCR1	PREDICTED: glioma tumor suppressor candidate region gene 1 protein-like isoform X3 [Sinocyclocheilus rhinocerous]	-	-	-	-
Unigene0001217	57031	55255.3333333333	495.2140	362.7893	305.4171	164.7230	271.9008	398.1834	387.8068	278.269066666667	-0.478857557900449	0.198146234845298	0.931436974213328	no	pim2	PREDICTED: serine/threonine-protein kinase pim-2-like [Cyprinus carpio]	-	-	-	-
Unigene0001218	139.333333333333	178.333333333333	4.6182	4.9450	4.0085	5.0413	4.5333	3.5237	4.5239	4.3661	-0.0512218653515881	0.90692279606702	1	no	-	--	-	-	-	-
Unigene0001219	70.6666666666667	127.666666666667	1.0678	3.9700	1.9994	3.8018	1.6937	3.8988	2.34573333333333	3.13143333333333	0.416784150166477	0.464899628793669	1	no	-	--	-	-	-	-
Unigene0001220	9.33333333333333	23.6666666666667	0.7192	0.3085	0.3626	1.0342	0.8330	0.7243	0.463433333333333	0.863833333333333	0.898391171339995	0.156005375369701	0.89150303392404	no	-	--	-	-	-	-
Unigene0001221	120.666666666667	133.666666666667	3.1321	2.4953	3.6273	4.8694	1.9760	0.9483	3.0849	2.5979	-0.247877825055497	0.665245472035075	1	no	-	--	-	-	-	-
Unigene0001222	108	83	13.2998	8.0048	9.7637	4.6188	5.2520	7.9509	10.3561	5.94056666666667	-0.801808340875722	0.091173544323258	0.779738386558327	no	-	--	-	-	-	-
Unigene0001223	128.333333333333	889.666666666667	0.6521	7.6319	1.8563	37.6588	4.8421	7.6315	3.3801	16.7108	2.30564296725238	0.00532196302970518	0.309927587398168	no	dhdh	PREDICTED: trans-1,2-dihydrobenzene-1,2-diol dehydrogenase-like [Sinocyclocheilus grahami]	ko00980//Metabolism of xenobiotics by cytochrome P450//Xenobiotics biodegradation and metabolism//Metabolism;ko00040//Pentose and glucuronate interconversions//Carbohydrate metabolism//Metabolism	-	-	GO:0044699//single-organism process;GO:0008152//metabolic process;GO:0044710//single-organism metabolic process
Unigene0001224	59.3333333333333	51	3.8656	1.9279	1.7850	1.7917	1.5969	1.3812	2.52616666666667	1.58993333333333	-0.667983551798481	0.197275466054428	0.931276245292093	no	-	--	-	-	-	-
Unigene0001225	167.666666666667	201.333333333333	9.7379	7.0803	16.1258	10.2754	12.2961	9.1055	10.9813333333333	10.559	-0.0565800249829509	0.900705738448449	1	no	-	--	-	-	-	-
Unigene0001226	728	1099.33333333333	39.3292	29.6898	53.9324	45.3606	53.7009	46.9592	40.9838	48.6735666666667	0.248084738657436	0.502006191206436	1	no	-	--	-	-	-	-
Unigene0001227	22	34	1.1644	1.0406	0.4892	1.0882	1.0114	0.9213	0.898066666666667	1.00696666666667	0.16512147659592	0.802085639852002	1	no	-	--	-	-	-	-
Unigene0001228	20.3333333333333	48.3333333333333	0.7909	2.1320	1.2670	3.3511	3.0365	1.2819	1.39663333333333	2.5565	0.872216715094828	0.157448674035254	0.892872560200859	no	-	PREDICTED: golgin subfamily A member 6-like protein 22 [Kryptolebias marmoratus]	-	-	-	-
Unigene0001229	429.666666666667	461.666666666667	2.0862	2.0092	2.8048	1.8871	2.1286	1.7744	2.30006666666667	1.93003333333333	-0.2530499135202	0.498254035199209	1	no	NHS	PREDICTED: Nance-Horan syndrome protein-like isoform X2 [Sinocyclocheilus rhinocerous]	-	-	-	-
Unigene0001230	102.666666666667	183.333333333333	2.1011	3.1069	3.1758	3.9472	2.9476	4.5247	2.7946	3.8065	0.445823277893568	0.314239247133895	0.996874991911097	no	pol	PREDICTED: uncharacterized protein LOC108184914 [Danio rerio]	-	-	-	-
Unigene0001231	460.333333333333	639.666666666667	26.4493	29.6325	36.6844	34.7740	32.1169	32.7792	30.9220666666667	33.2233666666667	0.103561530645333	0.777893437982638	1	no	glrx3	PREDICTED: glutaredoxin 3-like isoform X3 [Sinocyclocheilus grahami]	-	GO:0005622//intracellular;GO:0044444//cytoplasmic part;GO:0005737//cytoplasm;GO:0044464//cell part;GO:0044424//intracellular part;GO:0005623//cell	GO:0016667//oxidoreductase activity, acting on a sulfur group of donors;GO:0016491//oxidoreductase activity;GO:0015036//disulfide oxidoreductase activity;GO:0003824//catalytic activity	GO:0055065//metal ion homeostasis;GO:0098771//inorganic ion homeostasis;GO:0055080//cation homeostasis;GO:0043170//macromolecule metabolic process;GO:0065007//biological regulation;GO:0044763//single-organism cellular process;GO:0044710//single-organism metabolic process;GO:0055076//transition metal ion homeostasis;GO:0019725//cellular homeostasis;GO:0044238//primary metabolic process;GO:0009987/…
Unigene0001232	55	101.666666666667	1.0878	0.5417	1.1175	1.2104	0.5264	2.0465	0.915666666666667	1.2611	0.461788270243108	0.417899582839204	1	no	-	--	-	-	-	-
Unigene0001233	15	10	0.6402	1.0069	0.3586	0.2455	0.1853	0.5218	0.668566666666667	0.317533333333333	-1.07416337901536	0.137867882568182	0.86963354096789	no	-	--	-	-	-	-
Unigene0001234	34.3333333333333	20	0.7186	2.0038	1.0773	0.5531	0.3182	0.7642	1.26656666666667	0.545166666666667	-1.21615375766245	0.0482376981388137	0.648265426281935	no	-	PREDICTED: LOW QUALITY PROTEIN: protein NLRC5-like [Sinocyclocheilus anshuiensis]	-	-	-	-
Unigene0001235	24	27.6666666666667	3.5402	0.8226	1.9334	3.7376	0.8883	0.6130	2.09873333333333	1.7463	-0.265217444917035	0.745692165590085	1	no	-	--	-	-	-	-
Unigene0001236	3163	4763.66666666667	13.5868	13.6561	15.1033	15.9041	19.1331	14.2663	14.1154	16.4345	0.219457552581774	0.482776252992887	1	no	Atp11c	PREDICTED: phospholipid-transporting ATPase IG isoform X1 [Sinocyclocheilus rhinocerous]	-	-	-	-
Unigene0001237	5583.66666666667	4995.33333333333	32.3002	19.9077	21.1627	16.1069	18.6637	14.5960	24.4568666666667	16.4555333333333	-0.571666796560934	0.0825642420343871	0.760918587696575	no	pol	Septin-8-A [Larimichthys crocea]	-	-	-	-
Unigene0001238	2.33333333333333	1.66666666666667	0.0000	0.4400	0.4596	0.0000	0.3564	0.1967	0.299866666666667	0.184366666666667	-0.70174331906189	0.848472629332066	1	no	-	--	-	-	-	-
Unigene0001239	47	81.6666666666667	1.2097	0.7322	1.4340	1.7353	1.5459	1.2802	1.1253	1.52046666666667	0.434204519543541	0.387912036196457	1	no	-	PREDICTED: RNA-directed DNA polymerase from mobile element jockey-like [Oryzias latipes]	-	-	-	-
Unigene0001240	0	3.66666666666667	0.0000	0.0000	0.0000	0.3011	0.0000	0.1722	0.001	0.157766666666667	7.30164861112985	0.0352405132639679	0.59007698852728	no	-	PREDICTED: uncharacterized protein C2orf61 homolog [Sinocyclocheilus rhinocerous]	-	-	-	-
Unigene0001241	11.3333333333333	12.6666666666667	0.5326	0.4951	0.6895	0.7006	0.0000	0.7009	0.5724	0.467166666666667	-0.293086333527967	0.769184293387236	1	no	pol	PREDICTED: protein MAATS1 isoform X1 [Danio rerio]	-	-	-	-
Unigene0001242	17.6666666666667	7.66666666666667	1.3041	0.7843	1.3965	0.1434	0.3465	0.6695	1.16163333333333	0.386466666666667	-1.58773886749948	0.0321431239249974	0.576671923135266	no	-	--	-	-	-	-
Unigene0001243	189.333333333333	178.666666666667	6.0404	4.1577	5.8486	4.1094	4.3995	3.1548	5.3489	3.8879	-0.460251120015571	0.275665311751758	0.983839344944986	no	si:ch211-67n3.3	BLOC-1-related complex subunit 7 [Danio rerio]	-	-	-	-
Unigene0001244	9.66666666666667	3	1.1153	0.2221	0.6961	0.2482	0.2399	0.0000	0.677833333333333	0.1627	-2.05871633395581	0.0422342749927448	0.624436721591817	no	Tmem150c	PREDICTED: transmembrane protein 150C-like [Sinocyclocheilus rhinocerous]	-	-	-	-
Unigene0001245	223.333333333333	232	16.0883	13.7822	13.6583	14.5510	9.7667	9.5206	14.5096	11.2794333333333	-0.36331315769941	0.376837644915625	1	no	-	--	-	-	-	-
Unigene0001246	4	5	0.2428	0.4513	0.5304	0.3025	0.0914	0.7567	0.408166666666667	0.383533333333333	-0.0898063985671044	0.999999999999997	1	no	-	--	-	-	-	-
Unigene0001247	24.3333333333333	46	2.2921	2.3968	1.5299	3.3918	3.1633	2.2028	2.07293333333333	2.9193	0.493948756758982	0.353892374607664	1	no	-	--	-	-	-	-
Unigene0001248	21	27.6666666666667	0.9354	0.9108	0.6487	0.6383	0.9053	0.9163	0.831633333333333	0.819966666666667	-0.02038232272257	1	1	no	-	--	-	-	-	-
Unigene0001249	6.66666666666667	122.666666666667	0.0000	1.1646	0.0000	13.5055	0.0943	0.7810	0.3882	4.7936	3.62623750574509	0.0192350133516881	0.488899295518469	no	-	--	-	-	-	-
Unigene0001250	614.666666666667	1060.33333333333	2.3772	2.8362	1.9254	4.6289	2.0729	2.3333	2.3796	3.0117	0.339858984727511	0.404581848931034	1	no	AKAP13	PREDICTED: A-kinase anchor protein 13-like isoform X6 [Sinocyclocheilus anshuiensis]	-	-	-	-
Unigene0001251	155.666666666667	160.333333333333	10.2761	7.9993	8.0906	5.4423	5.6082	9.1683	8.78866666666667	6.7396	-0.38298134094858	0.383147465074666	1	no	-	--	-	-	-	-
Unigene0001252	14.6666666666667	11	1.0843	0.6299	0.8883	0.7178	0.7652	0.0422	0.8675	0.5084	-0.770899727348027	0.341805234393804	1	no	-	--	-	-	-	-
Unigene0001253	68.6666666666667	65.3333333333333	1.2343	4.1372	1.4708	1.7712	2.0273	1.1192	2.28076666666667	1.63923333333333	-0.476497633055424	0.410653204829197	1	no	-	Retrotransposable element Tf2 protein type 3 [Larimichthys crocea]	-	-	-	-
Unigene0001254	14.6666666666667	18.3333333333333	0.6035	0.5609	0.7324	0.5013	0.5300	0.7837	0.632266666666667	0.605	-0.0635980197115332	0.918800770563748	1	no	-	--	-	-	-	-
Unigene0001255	45.6666666666667	62.3333333333333	1.9337	2.6651	3.1560	3.9054	2.0078	2.2030	2.58493333333333	2.7054	0.0657148425841614	0.913842890902893	1	no	-	--	-	-	-	-
Unigene0001256	6	24.6666666666667	0.2680	0.6642	0.4553	1.7810	1.2104	1.3364	0.4625	1.4426	1.64114605818369	0.015205672803628	0.44945495609577	no	-	PREDICTED: zinc finger BED domain-containing protein 4 isoform X3 [Danio rerio]	-	-	-	-
Unigene0001257	15	21.6666666666667	0.9595	0.5488	1.2899	1.2877	0.2222	1.5183	0.932733333333333	1.0094	0.113961410347618	0.907191076404792	1	no	-	--	-	-	-	-
Unigene0001258	3.66666666666667	0.333333333333333	0.3998	0.0000	0.0647	0.0277	0.0000	0.0000	0.154833333333333	0.00923333333333333	-4.06772071522082	0.0656403763212264	0.713710963503617	no	-	--	-	-	-	-
Unigene0001259	32	39.3333333333333	0.6416	1.0138	0.9811	0.8795	1.3041	0.4000	0.878833333333333	0.8612	-0.0292412713788044	0.962112603855855	1	no	-	--	-	-	-	-
Unigene0001260	1626	1818.33333333333	9.7681	10.4988	9.8957	7.2193	8.4493	9.9374	10.0542	8.53533333333333	-0.236278891251373	0.475274346653703	1	no	MCF2L	PREDICTED: guanine nucleotide exchange factor DBS-like [Sinocyclocheilus grahami]	-	-	-	-
Unigene0001261	371	224.666666666667	3.5141	1.8363	2.8159	1.3200	1.0252	1.3626	2.7221	1.23593333333333	-1.13911914127855	0.00629078534708016	0.335930710841361	no	CDH1	PREDICTED: B-cadherin-like [Sinocyclocheilus grahami]	ko04514//Cell adhesion molecules (CAMs)//Signaling molecules and interaction//Environmental Information Processing;ko04520//Adherens junction//Cellular commiunity//Cellular Processes	-	-	-
Unigene0001262	5.33333333333333	3	1.2634	0.0000	0.2123	0.1817	0.2195	0.1817	0.4919	0.1943	-1.34007915413798	0.33397199989532	1	no	-	--	-	-	-	-
Unigene0001263	20.6666666666667	18.3333333333333	1.7355	1.0754	1.6248	1.1328	1.1820	0.7213	1.47856666666667	1.01203333333333	-0.546942485336904	0.365565846605088	1	no	-	--	-	-	-	-
Unigene0001264	31.6666666666667	37	1.6447	2.7516	2.3353	2.6643	1.9809	1.3841	2.24386666666667	2.00976666666667	-0.158958937123132	0.789521133027324	1	no	-	--	-	-	-	-
Unigene0001265	28	10.6666666666667	2.9571	0.2843	3.8610	0.4447	0.6141	1.0806	2.36746666666667	0.713133333333333	-1.73110036780128	0.0338615430553144	0.585145808614515	no	-	--	-	-	-	-
Unigene0001266	133	204.666666666667	3.2306	5.3307	4.0175	6.0611	5.4102	3.3488	4.19293333333333	4.94003333333333	0.23656088471105	0.598546694529627	1	no	-	--	-	-	-	-
Unigene0001267	1	1	0.3576	0.0000	0.0000	0.0743	0.0897	0.0743	0.1192	0.0794333333333333	-0.585567784993047	0.999999999999998	1	no	-	--	-	-	-	-
Unigene0001268	826	4800.66666666667	4.4161	75.8430	9.1543	267.0436	40.6098	56.3713	29.8044666666667	121.341566666667	2.02547338106853	0.0195719688483267	0.490101990441289	no	APOC2	apolipoprotein C-II [Hemibarbus mylodon]	-	-	-	-
Unigene0001269	397.666666666667	458.333333333333	2.7537	2.5893	2.9404	2.1559	2.2602	2.8526	2.76113333333333	2.4229	-0.18852569453858	0.61259131939912	1	no	ATF2	PREDICTED: cyclic AMP-dependent transcription factor ATF-2-like [Sinocyclocheilus anshuiensis]	ko04010//MAPK signaling pathway//Signal transduction//Environmental Information Processing;ko04261//Adrenergic signaling in cardiomyocytes//Circulatory system//Organismal Systems	-	-	-
Unigene0001270	55.6666666666667	60.6666666666667	1.1446	1.0391	1.5894	1.5258	0.9017	0.7467	1.2577	1.05806666666667	-0.24935730461766	0.627719855509901	1	no	-	--	-	-	-	-
Unigene0001271	15.3333333333333	27.3333333333333	0.5307	0.4385	1.2452	0.9185	0.8878	1.3601	0.738133333333333	1.05546666666667	0.515927669410793	0.453173361628505	1	no	-	--	-	-	-	-
Unigene0001272	67.6666666666667	55	1.7376	0.7022	1.9070	0.3452	0.4929	1.8367	1.44893333333333	0.8916	-0.700522695074106	0.293509692224054	0.991802929675459	no	bsx	brain-specific homeobox protein homolog [Danio rerio]	-	GO:0043226//organelle;GO:0043229//intracellular organelle;GO:0005623//cell;GO:0005622//intracellular;GO:0043231//intracellular membrane-bounded organelle;GO:0044424//intracellular part;GO:0043227//membrane-bounded organelle;GO:0044464//cell part	GO:0003677//DNA binding;GO:0001071//nucleic acid binding transcription factor activity;GO:0005488//binding;GO:1901363//heterocyclic compound binding;GO:0097159//organic cyclic compound binding;GO:0003676//nucleic acid binding	GO:1901576//organic substance biosynthetic process;GO:0009987//cellular process;GO:0046483//heterocycle metabolic process;GO:0006807//nitrogen compound metabolic process;GO:0009058//biosynthetic process;GO:0090304//nucleic acid metabolic process;GO:1901360//organic cyclic compound metabolic process;GO:0006139//nucleobase-containing compound metabolic process;GO:0044238//primary metabolic process;…
Unigene0001273	17.6666666666667	20.6666666666667	0.9491	1.0292	1.5550	1.1827	1.7266	0.4437	1.17776666666667	1.11766666666667	-0.0755637654282087	0.905168197403737	1	no	-	--	-	-	-	-
Unigene0001274	21.3333333333333	40.6666666666667	1.2312	1.0013	0.7097	1.7900	0.8496	1.4071	0.980733333333333	1.3489	0.459850580464226	0.409810731071538	1	no	-	--	-	-	-	-
Unigene0001275	240.666666666667	265	29.6082	19.4089	17.8527	14.9524	18.2996	21.3711	22.2899333333333	18.2077	-0.29184360934433	0.484683366311628	1	no	-	--	-	-	-	-
Unigene0001276	243	314.666666666667	32.6080	25.2363	27.1358	22.8047	26.4497	33.6015	28.3267	27.6186333333333	-0.0365206088558914	0.933296390955179	1	no	-	--	-	-	-	-
Unigene0001277	43523.3333333333	39287	325.2019	233.5121	229.6567	165.2483	174.2425	192.2045	262.790233333333	177.231766666667	-0.568274445686302	0.0687688580104064	0.722878981771123	no	pim2	PREDICTED: RNA-directed DNA polymerase from mobile element jockey-like [Sinocyclocheilus anshuiensis]	-	-	-	-
Unigene0001278	59	70.3333333333333	3.7987	3.0438	3.2907	3.5094	3.1060	2.5313	3.37773333333333	3.0489	-0.147766601578352	0.760412354536868	1	no	-	--	-	-	-	-
Unigene0001279	10.6666666666667	20.6666666666667	0.8750	2.0332	0.3186	1.0904	2.2230	1.2954	1.0756	1.53626666666667	0.514287001885204	0.515317148877054	1	no	-	--	-	-	-	-
Unigene0001280	21.6666666666667	23	1.9413	0.7733	1.2621	1.2959	0.8350	0.9940	1.32556666666667	1.04163333333333	-0.347761707355113	0.577457925675564	1	no	-	--	-	-	-	-
Unigene0001281	8.66666666666667	2.33333333333333	1.2506	0.8137	0.8196	0.1558	0.2824	0.1559	0.9613	0.198033333333333	-2.27924344596184	0.0088593912879277	0.374499659909932	no	-	--	-	-	-	-
Unigene0001282	2169.66666666667	2654	15.3897	15.4199	14.1385	14.7054	13.0470	13.6740	14.9827	13.8088	-0.117709678934151	0.709988676200816	1	no	-	--	-	-	-	-
Unigene0001283	143	76	18.3144	10.8419	12.2245	2.8528	3.6928	9.5818	13.7936	5.3758	-1.359447665306	0.0123967038958458	0.421406756661499	no	-	--	-	-	-	-
Unigene0001284	15	25.3333333333333	1.1766	1.4581	1.2137	1.5273	2.1404	1.3447	1.2828	1.6708	0.381242789721146	0.543362801263569	1	no	-	--	-	-	-	-
Unigene0001285	706.666666666667	825.666666666667	7.8774	7.2578	6.3046	5.6451	6.2410	6.9149	7.1466	6.267	-0.189482048796816	0.590293096600973	1	no	-	PREDICTED: uncharacterized protein LOC107758869 [Sinocyclocheilus rhinocerous]	-	-	-	-
Unigene0001286	1.33333333333333	3	0.1024	0.0952	0.0000	0.0957	0.0771	0.1277	0.0658666666666667	0.100166666666667	0.604782044013874	0.681622397844801	1	no	-	--	-	-	-	-
Unigene0001287	0	0	0.0000	0.0000	0.0000	0.0000	0.0000	0.0000	0.001	0.001	0	notest	notest	notest	-	--	-	-	-	-
Unigene0001288	71.6666666666667	119.666666666667	6.6854	8.6107	3.3381	6.7242	8.4834	7.6205	6.2114	7.60936666666667	0.292857905080001	0.551127633957507	1	no	-	--	-	-	-	-
Unigene0001289	14.3333333333333	14.3333333333333	1.5414	1.2536	0.9119	1.2005	0.5802	0.9008	1.23563333333333	0.893833333333333	-0.467172943141646	0.477535780866617	1	no	-	--	-	-	-	-
Unigene0001290	126	120	3.7297	2.3817	3.2548	1.6852	1.6288	3.3544	3.12206666666667	2.2228	-0.490123198654856	0.306364988384794	0.996645002446925	no	-	PREDICTED: alpha-tubulin N-acetyltransferase 1 isoform X3 [Sinocyclocheilus rhinocerous]	-	-	-	-
Unigene0001291	2.66666666666667	14.6666666666667	0.0440	0.0409	0.0641	0.3702	0.2319	0.0412	0.0496666666666667	0.214433333333333	2.11017935799711	0.02672714355259	0.542823101457575	no	-	PREDICTED: cell surface glycoprotein 1-like [Sinocyclocheilus anshuiensis]	-	-	-	-
Unigene0001292	456.333333333333	601.333333333333	6.6914	8.6848	3.3470	9.1459	5.5022	3.2411	6.24106666666667	5.96306666666667	-0.0657381564671529	0.891395419609009	1	no	CD97	PREDICTED: CD97 antigen-like [Sinocyclocheilus grahami]	-	GO:0016020//membrane;GO:0044425//membrane part;GO:0031224//intrinsic component of membrane	GO:0004872//receptor activity;GO:0043167//ion binding;GO:0004871//signal transducer activity;GO:0043169//cation binding;GO:0046872//metal ion binding;GO:0005488//binding;GO:0060089//molecular transducer activity;GO:0038023//signaling receptor activity	GO:0065007//biological regulation;GO:0050794//regulation of cellular process;GO:0050789//regulation of biological process;GO:0023052//signaling;GO:0007186//G-protein coupled receptor signaling pathway;GO:0044699//single-organism process;GO:0044700//single organism signaling;GO:0044763//single-organism cellular process;GO:0007165//signal transduction;GO:0050896//response to stimulus;GO:0007154//ce…
Unigene0001293	14.6666666666667	57	0.2857	2.1244	0.4161	1.7355	1.1828	4.8975	0.942066666666667	2.60526666666667	1.46752998676055	0.0620488101823915	0.699992192881866	no	-	PREDICTED: aryl hydrocarbon receptor repressor-like [Sinocyclocheilus grahami]	-	GO:0005623//cell;GO:0044424//intracellular part;GO:0043229//intracellular organelle;GO:0044464//cell part;GO:0043231//intracellular membrane-bounded organelle;GO:0043227//membrane-bounded organelle;GO:0043226//organelle;GO:0005622//intracellular	GO:0097159//organic cyclic compound binding;GO:1901363//heterocyclic compound binding;GO:0001076//transcription factor activity, RNA polymerase II transcription factor binding;GO:0005488//binding;GO:0000988//transcription factor activity, protein binding;GO:0000989//transcription factor activity, transcription factor binding;GO:0003676//nucleic acid binding	GO:0034654//nucleobase-containing compound biosynthetic process;GO:1901360//organic cyclic compound metabolic process;GO:0008152//metabolic process;GO:0046483//heterocycle metabolic process;GO:0044271//cellular nitrogen compound biosynthetic process;GO:0009987//cellular process;GO:0006139//nucleobase-containing compound metabolic process;GO:0019438//aromatic compound biosynthetic process;GO:00508…
Unigene0001294	48.3333333333333	73.3333333333333	1.6249	1.7562	1.4308	1.3420	2.0481	2.1436	1.60396666666667	1.84456666666667	0.201637771836102	0.685848171813668	1	no	-	PREDICTED: zinc finger BED domain-containing protein 1-like [Cyprinus carpio]	-	-	-	-
Unigene0001295	3306.33333333333	4364.33333333333	13.6622	17.6666	16.7193	13.8379	19.5049	15.7781	16.0160333333333	16.3736333333333	0.031857611593939	0.921054826546401	1	no	SF1	PREDICTED: splicing factor 1 isoform X1 [Danio rerio]	-	-	GO:1901363//heterocyclic compound binding;GO:0043167//ion binding;GO:0003676//nucleic acid binding;GO:0046914//transition metal ion binding;GO:0097159//organic cyclic compound binding;GO:0005488//binding;GO:0043169//cation binding;GO:0046872//metal ion binding	GO:0007275//multicellular organism development;GO:0048731//system development;GO:0043010//camera-type eye development;GO:0044707//single-multicellular organism process;GO:0048856//anatomical structure development;GO:0007423//sensory organ development;GO:0032502//developmental process;GO:0001654//eye development;GO:0032501//multicellular organismal process;GO:0044699//single-organism process;GO:00…
Unigene0001296	20647.6666666667	22397.3333333333	89.7434	76.4186	119.1895	74.2283	79.7476	86.6579	95.1171666666667	80.2112666666667	-0.24590084566398	0.435186195618589	1	no	TDRD6	PREDICTED: tudor domain-containing protein 6-like isoform X3 [Sinocyclocheilus rhinocerous]	-	-	-	-
Unigene0001297	1719.33333333333	2155.66666666667	19.1406	14.2546	15.3735	11.4491	17.1424	17.7967	16.2562333333333	15.4627333333333	-0.072197649350978	0.834420348586817	1	no	phactr1	PREDICTED: phosphatase and actin regulator 1-like isoform X2 [Sinocyclocheilus rhinocerous]	-	-	-	-
Unigene0001298	20.3333333333333	14.6666666666667	0.2785	1.2080	2.9742	0.6362	1.3976	0.7523	1.4869	0.9287	-0.679023083583777	0.388614041423174	1	no	-	--	-	-	-	-
Unigene0001299	3.33333333333333	15.6666666666667	0.2464	0.3435	0.4485	1.0746	0.9274	1.7664	0.346133333333333	1.25613333333333	1.85958982071227	0.0161610531993755	0.457643995006404	no	Tf2-6	PREDICTED: RNA-directed DNA polymerase homolog, partial [Danio rerio]	-	-	-	-
Unigene0001300	4.33333333333333	5.66666666666667	0.4058	0.1257	0.2462	0.2107	0.4073	0.1686	0.259233333333333	0.2622	0.0164164474962166	1	1	no	Plekhs1	PREDICTED: pleckstrin homology domain-containing family S member 1-like [Sinocyclocheilus anshuiensis]	-	-	-	-
Unigene0001301	43.3333333333333	89.3333333333333	2.5676	2.8861	1.5218	4.5390	3.2364	2.7545	2.32516666666667	3.50996666666667	0.594123198143754	0.238913707819759	0.959006828824536	no	-	PREDICTED: beta-taxilin isoform X1 [Salmo salar]	-	-	-	-
Unigene0001302	121.333333333333	141	2.8211	3.1783	3.0087	1.7400	3.5179	2.8599	3.0027	2.70593333333333	-0.150134046555268	0.742778616870087	1	no	-	PREDICTED: proteoglycan 4-like [Cyprinus carpio]	-	-	-	-
Unigene0001303	5	10.6666666666667	0.7365	0.9583	0.3218	1.1930	1.1087	0.8263	0.6722	1.04266666666667	0.633315564165561	0.430228878440269	1	no	-	--	-	-	-	-
Unigene0001304	252	208.666666666667	6.2463	4.7376	1.9435	4.5963	1.9673	1.0052	4.30913333333333	2.52293333333333	-0.772295654394917	0.183786964734509	0.921787872434826	no	-	--	-	-	-	-
Unigene0001305	1105.33333333333	1497	5.9806	6.9568	7.4893	7.8096	7.7315	5.8355	6.8089	7.12553333333333	0.0655762563575422	0.849225519359598	1	no	Mdc1	PREDICTED: mediator of DNA damage checkpoint protein 1-like isoform X1 [Sinocyclocheilus rhinocerous]	-	-	-	-
Unigene0001306	4756	6568	68.7704	86.9088	93.8512	69.0914	110.3100	90.1784	83.1768	89.8599333333333	0.111496809228897	0.732336942628492	1	no	Thoc3	THO complex subunit 3 [Danio rerio]	ko03013//RNA transport//Translation//Genetic Information Processing;ko03040//Spliceosome//Transcription//Genetic Information Processing	-	-	-
Unigene0001307	22.6666666666667	4	2.9399	2.9809	2.1407	0.0833	0.1006	0.8330	2.68716666666667	0.338966666666667	-2.98687049110438	0.000321257320864416	0.072062776437605	no	-	--	-	-	-	-
Unigene0001308	29.6666666666667	47.3333333333333	0.6524	1.7584	2.3751	1.2601	3.1429	1.9113	1.5953	2.10476666666667	0.399832553964097	0.532512249304223	1	no	-	--	-	-	-	-
Unigene0001309	34.3333333333333	67.3333333333333	1.6826	1.1450	0.1313	1.3104	1.3797	1.3298	0.9863	1.33996666666667	0.442098673482545	0.525813872932657	1	no	POL	PREDICTED: gypsy retrotransposon integrase-like protein 1 [Danio rerio]	-	-	-	-
Unigene0001310	142	89.3333333333333	11.4977	9.6989	14.0005	4.9966	3.4911	8.2514	11.7323666666667	5.5797	-1.07223460401429	0.0261244405855815	0.539254427551152	no	-	--	-	-	-	-
Unigene0001311	3411.66666666667	3683	15.1681	11.7554	15.5306	6.5488	11.1433	17.2914	14.1513666666667	11.6611666666667	-0.279229254590884	0.462260542492279	1	no	ptpru	receptor protein tyrosine phosphatase psi [Danio rerio]	-	GO:0016020//membrane;GO:0031224//intrinsic component of membrane;GO:0044425//membrane part	GO:0016788//hydrolase activity, acting on ester bonds;GO:0016791//phosphatase activity;GO:0042578//phosphoric ester hydrolase activity;GO:0004725//protein tyrosine phosphatase activity;GO:0016787//hydrolase activity;GO:0003824//catalytic activity;GO:0004721//phosphoprotein phosphatase activity	GO:0009888//tissue development;GO:0007389//pattern specification process;GO:0006793//phosphorus metabolic process;GO:0051716//cellular response to stimulus;GO:0044707//single-multicellular organism process;GO:0035282//segmentation;GO:0007166//cell surface receptor signaling pathway;GO:0048869//cellular developmental process;GO:0008152//metabolic process;GO:0048856//anatomical structure developmen…
Unigene0001312	64.3333333333333	49.3333333333333	5.3062	5.6242	4.8127	3.1321	2.5227	3.3657	5.2477	3.00683333333333	-0.803440343912514	0.094040639172371	0.787379809297936	no	-	--	-	-	-	-
Unigene0001313	1140.33333333333	1901	15.3262	13.6079	17.9070	22.5763	16.9754	20.0523	15.6137	19.868	0.347634196626542	0.307010909962487	0.996829675044774	no	R3hcc1l	PREDICTED: coiled-coil domain-containing protein R3HCC1L-like [Sinocyclocheilus rhinocerous]	-	-	-	-
Unigene0001314	54	61.6666666666667	1.5116	0.6386	1.1007	0.9704	0.9137	0.9137	1.08363333333333	0.9326	-0.216546342871944	0.677175132820784	1	no	-	PREDICTED: LOW QUALITY PROTEIN: oxygen-regulated protein 1-like [Sinocyclocheilus grahami]	-	-	-	-
Unigene0001315	16	23	0.8670	1.6118	1.4731	1.2605	2.6107	0.7207	1.3173	1.53063333333333	0.216544783077166	0.785900951210033	1	no	-	--	-	-	-	-
[truncated: 72,134 more rows]
