# Supplementary material for: Comparative Analysis of miRNA-mRNA Regulation in the Testes of Gobiocypris rarus following 17α-Methyltestosterone Exposure
Source: Int J Mol Sci. 2023 Feb 20;24(4):4239. doi: 10.3390/ijms24044239 (PMC9968023; doi:10.3390/ijms24044239)
Supplement: Supplementary file 1 [file ijms-24-04239-s001.zip › Table S3-MT50-M-VS-MT100-M.annot.xls]

GeneID	MT50-M_count	MT100-M_count	MT50-M1_rpkm	MT50-M2_rpkm	MT50-M3_rpkm	MT100-M1_rpkm	MT100-M2_rpkm	MT100-M3_rpkm	MT50-M_rpkm	MT100-M_rpkm	log2 Ratio(MT100-M/MT50-M)	Pvalue	FDR	significant	Symbol	Description	Pathway	GO Component	GO Function	GO Process
Unigene0000001	12	14.3333333333333	0.2566	1.9660	0.2641	0.8824	0.8529	0.9417	0.8289	0.892333333333333	0.106384670273335	0.929045024529844	1	no	Npr1	PREDICTED: atrial natriuretic peptide receptor 1-like [Cyprinus carpio]	ko04270//Vascular smooth muscle contraction//Circulatory system//Organismal Systems;ko00230//Purine metabolism//Nucleotide metabolism//Metabolism	GO:0031224//intrinsic component of membrane;GO:0016020//membrane;GO:0044425//membrane part	GO:0005488//binding;GO:0016772//transferase activity, transferring phosphorus-containing groups;GO:0036094//small molecule binding;GO:0001883//purine nucleoside binding;GO:0009975//cyclase activity;GO:0016301//kinase activity;GO:1901363//heterocyclic compound binding;GO:0016740//transferase activity;GO:0016829//lyase activity;GO:0032549//ribonucleoside binding;GO:0003824//catalytic activity;GO:00…	GO:0009152//purine ribonucleotide biosynthetic process;GO:1901135//carbohydrate derivative metabolic process;GO:0006164//purine nucleotide biosynthetic process;GO:0006753//nucleoside phosphate metabolic process;GO:1901566//organonitrogen compound biosynthetic process;GO:0044711//single-organism biosynthetic process;GO:1901293//nucleoside phosphate biosynthetic process;GO:0044237//cellular metabol…
Unigene0000002	19.3333333333333	18	0.7330	0.7576	0.9638	0.5601	0.4060	1.1207	0.818133333333333	0.6956	-0.23407804947519	0.740957555208339	1	no	-	--	-	-	-	-
Unigene0000003	16.6666666666667	12.3333333333333	0.6239	0.9312	1.4009	0.8322	0.7541	0.4683	0.985333333333333	0.684866666666667	-0.524788719463701	0.444246767597384	1	no	Gpr64	PREDICTED: cell wall protein DAN4-like [Sinocyclocheilus anshuiensis]	-	-	-	-
Unigene0000004	2136.33333333333	2614	14.8766	15.4378	16.4127	13.2300	19.8130	20.7938	15.5757	17.9456	0.204333157555018	0.562061788145042	1	no	PDLIM5	PDZ and LIM domain 5 isoform 2 [Danio rerio]	-	-	GO:0043169//cation binding;GO:0005488//binding;GO:0043167//ion binding	-
Unigene0000005	23	17	1.0269	1.2443	0.3774	0.8744	0.6907	0.2692	0.882866666666667	0.611433333333333	-0.530000368573654	0.462188366925692	1	no	ZCCHC24	Zinc finger CCHC domain-containing protein 24 [Dicentrarchus labrax]	-	-	GO:0003723//RNA binding;GO:0005488//binding;GO:0097159//organic cyclic compound binding;GO:0003676//nucleic acid binding;GO:1901363//heterocyclic compound binding;GO:0046872//metal ion binding;GO:0043169//cation binding;GO:0043167//ion binding	-
Unigene0000006	4661	4859	15.1414	6.8929	19.8930	6.2055	10.9052	23.7537	13.9757666666667	13.6214666666667	-0.0370453756782506	0.940707552601987	1	no	EML6	PREDICTED: echinoderm microtubule-associated protein-like 6 isoform X3 [Sinocyclocheilus grahami]	-	-	-	-
Unigene0000007	4.66666666666667	71	0.1544	0.0563	0.1589	4.6725	0.0855	0.2833	0.1232	1.68043333333333	3.76975914759555	0.00119765439119229	0.268369117049982	no	-	--	-	-	-	-
Unigene0000008	73.3333333333333	78.3333333333333	1.3844	0.6950	0.7972	0.7803	1.0553	1.0836	0.958866666666667	0.973066666666667	0.0212084321551642	0.979813491829283	1	no	-	PREDICTED: tripartite motif-containing protein 35-like [Sinocyclocheilus grahami]	-	-	-	-
Unigene0000009	79.6666666666667	89	1.1088	1.4532	0.8593	1.9205	1.2739	0.3768	1.14043333333333	1.1904	0.0618643185170762	0.923159687722207	1	no	-	--	-	-	-	-
Unigene0000010	9.66666666666667	13.3333333333333	0.1272	0.6266	1.1783	0.7000	0.6342	1.1088	0.644033333333333	0.814333333333333	0.338484097707604	0.702500441946773	1	no	-	TCR beta variable region, partial [Ictalurus punctatus]	-	-	-	-
Unigene0000011	475	625.666666666667	6.4473	8.2102	5.4663	10.7085	8.0710	5.8777	6.70793333333333	8.21906666666667	0.293106224173998	0.471632293209146	1	no	-	--	-	-	-	-
Unigene0000012	27.3333333333333	16.3333333333333	1.2594	2.1503	0.9331	1.6630	0.6697	0.0462	1.4476	0.792966666666667	-0.86833088597469	0.31857585267532	1	no	-	--	-	-	-	-
Unigene0000013	21.6666666666667	25	0.4975	0.5444	1.1945	1.1556	0.8818	0.3955	0.745466666666667	0.810966666666667	0.12149877201773	0.87330271529839	1	no	-	PREDICTED: disks large homolog 5-like [Sinocyclocheilus grahami]	-	-	-	-
Unigene0000014	16.3333333333333	20.3333333333333	0.9243	0.8276	0.3891	1.4254	0.6981	0.3469	0.713666666666667	0.823466666666667	0.206459861995208	0.818263100430235	1	no	-	--	-	-	-	-
Unigene0000015	101.666666666667	664	1.9750	2.8370	0.8347	25.9522	3.6922	3.2032	1.88223333333333	10.9492	2.54030807389622	0.00069999430484242	0.198686274112362	no	Samsn1	PREDICTED: SAM domain-containing protein SAMSN-1-like isoform X3 [Sinocyclocheilus anshuiensis]	-	-	-	-
Unigene0000016	498.333333333333	521	3.7389	4.1064	2.3126	2.2399	3.4927	4.2070	3.38596666666667	3.3132	-0.0313424768537544	0.942636178876948	1	no	C3orf58	PREDICTED: deleted in autism protein 1 homolog [Sinocyclocheilus anshuiensis]	-	-	-	-
Unigene0000017	107.666666666667	108.333333333333	2.4852	4.8428	2.9628	5.1413	2.0817	2.1687	3.43026666666667	3.13056666666667	-0.131896910605246	0.813943306482847	1	no	-	--	-	-	-	-
Unigene0000018	461	561.333333333333	3.7891	5.7071	3.5743	6.1135	5.5371	3.2362	4.35683333333333	4.96226666666667	0.187719340801331	0.656178569940605	1	no	GATSL3	GATS-like protein 3 [Danio rerio]	-	-	-	-
Unigene0000019	10.3333333333333	30.6666666666667	0.2047	0.8402	0.6320	3.8481	0.3402	0.1878	0.558966666666667	1.4587	1.38384904809442	0.17311237371624	1	no	-	pol-like protein [Tetraodon nigroviridis]	ko04080//Neuroactive ligand-receptor interaction//Signaling molecules and interaction//Environmental Information Processing	-	-	-
Unigene0000020	31	21	1.3196	1.4908	1.3141	0.9368	1.3204	0.4296	1.37483333333333	0.8956	-0.61833030260881	0.307122116312151	1	no	-	--	-	-	-	-
Unigene0000021	20.3333333333333	15.6666666666667	0.6805	2.3697	0.9549	1.7018	0.9595	0.1703	1.33503333333333	0.943866666666667	-0.500220783989376	0.544600283897181	1	no	-	--	-	-	-	-
Unigene0000022	1571.33333333333	1654	5.6447	6.0402	9.5592	5.6217	5.5998	9.4895	7.08136666666667	6.90366666666667	-0.0366650119617852	0.92634632476936	1	no	fgfr1a	PREDICTED: LOW QUALITY PROTEIN: fibroblast growth factor receptor 1-A-like [Cyprinus carpio]	ko04010//MAPK signaling pathway//Signal transduction//Environmental Information Processing;ko04810//Regulation of actin cytoskeleton//Cell motility//Cellular Processes;ko04520//Adherens junction//Cellular commiunity//Cellular Processes	GO:0043226//organelle;GO:0043227//membrane-bounded organelle;GO:0044425//membrane part;GO:0005622//intracellular;GO:0005623//cell;GO:0044424//intracellular part;GO:0016020//membrane;GO:0043229//intracellular organelle;GO:0044444//cytoplasmic part;GO:0005737//cytoplasm;GO:0043231//intracellular membrane-bounded organelle;GO:0031982//vesicle;GO:0044464//cell part;GO:0031224//intrinsic component of …	GO:0001883//purine nucleoside binding;GO:0004888//transmembrane signaling receptor activity;GO:0019199//transmembrane receptor protein kinase activity;GO:0032549//ribonucleoside binding;GO:0019838//growth factor binding;GO:0097367//carbohydrate derivative binding;GO:0004714//transmembrane receptor protein tyrosine kinase activity;GO:0016772//transferase activity, transferring phosphorus-containin…	GO:0048646//anatomical structure formation involved in morphogenesis;GO:0009653//anatomical structure morphogenesis;GO:0050790//regulation of catalytic activity;GO:0048736//appendage development;GO:0050789//regulation of biological process;GO:0065009//regulation of molecular function;GO:0009888//tissue development;GO:0045859//regulation of protein kinase activity;GO:0043405//regulation of MAP kin…
Unigene0000023	6.33333333333333	12.6666666666667	0.1262	0.8284	0.3245	0.8676	1.2578	0.2893	0.426366666666667	0.8049	0.916714902669213	0.303675521594771	1	no	-	--	-	-	-	-
Unigene0000024	1460	2020	5.5682	6.7040	3.7611	9.9676	5.8466	4.6680	5.34443333333333	6.8274	0.353299290115841	0.385483738477797	1	no	myo1c	PREDICTED: unconventional myosin-Ic-like [Cyprinus carpio]	-	-	-	-
Unigene0000025	322.666666666667	320.666666666667	1.8130	2.5512	3.3238	2.2563	2.8694	2.0896	2.56266666666667	2.4051	-0.0915489553225074	0.830575221982296	1	no	-	--	-	-	-	-
Unigene0000026	3762	4011.33333333333	20.7499	21.5567	18.9588	23.3797	20.1563	17.5051	20.4218	20.3470333333333	-0.00529157257302236	0.9876901603455	1	no	Uso1	PREDICTED: general vesicular transport factor p115 isoform X3 [Sinocyclocheilus anshuiensis]	-	GO:0012505//endomembrane system;GO:0044424//intracellular part;GO:0044422//organelle part;GO:0005623//cell;GO:0044464//cell part;GO:0044446//intracellular organelle part;GO:0005794//Golgi apparatus;GO:0043226//organelle;GO:0043229//intracellular organelle;GO:0044444//cytoplasmic part;GO:0043227//membrane-bounded organelle;GO:0043231//intracellular membrane-bounded organelle;GO:0005737//cytoplasm;…	-	GO:0061024//membrane organization;GO:1902589//single-organism organelle organization;GO:0016050//vesicle organization;GO:0046907//intracellular transport;GO:0044801//single-organism membrane fusion;GO:0048193//Golgi vesicle transport;GO:0044765//single-organism transport;GO:0071840//cellular component organization or biogenesis;GO:0016043//cellular component organization;GO:0051649//establishment…
Unigene0000027	18	17.6666666666667	0.9904	0.9128	1.0192	0.7648	1.2127	0.7651	0.974133333333333	0.9142	-0.0916094340368267	0.892737010360326	1	no	-	--	-	-	-	-
Unigene0000028	18.3333333333333	32.6666666666667	0.7264	0.5782	0.5776	0.8780	1.3534	0.9693	0.6274	1.0669	0.765967525124949	0.195966780761484	1	no	-	--	-	-	-	-
Unigene0000029	37.3333333333333	60.6666666666667	0.5857	0.6054	0.7032	0.9698	1.3699	0.6120	0.631433333333333	0.9839	0.639881270305822	0.241216311375643	1	no	-	--	-	-	-	-
Unigene0000030	10	14.3333333333333	0.8042	0.1760	0.6621	0.8358	0.4158	0.9346	0.547433333333333	0.728733333333333	0.412707699806448	0.576196102258434	1	no	-	--	-	-	-	-
Unigene0000031	708.666666666667	637.333333333333	10.5982	3.3122	13.0036	6.6488	7.3075	8.9638	8.97133333333333	7.64003333333333	-0.231743483903116	0.629161301091294	1	no	-	PREDICTED: leucine-rich repeat and IQ domain-containing protein 3 isoform X1 [Danio rerio]	-	-	-	-
Unigene0000032	12	12	0.4376	0.7402	0.3275	0.2189	1.1019	0.1825	0.501766666666667	0.5011	-0.00191809513182514	1	1	no	pol	PREDICTED: RNA-directed DNA polymerase from mobile element jockey-like [Poecilia formosa]	-	-	-	-
Unigene0000033	614.666666666667	881.666666666667	4.6856	6.5708	5.1368	7.9148	9.2232	5.0789	5.4644	7.40563333333333	0.438560026432247	0.269608010370524	1	no	MKX	PREDICTED: homeobox protein Mohawk-like isoform X2 [Sinocyclocheilus rhinocerous]	-	GO:0043231//intracellular membrane-bounded organelle;GO:0043227//membrane-bounded organelle;GO:0005622//intracellular;GO:0005623//cell;GO:0043229//intracellular organelle;GO:0044424//intracellular part;GO:0044464//cell part;GO:0043226//organelle	GO:0001071//nucleic acid binding transcription factor activity;GO:1901363//heterocyclic compound binding;GO:0003676//nucleic acid binding;GO:0005488//binding;GO:0097159//organic cyclic compound binding	GO:0071704//organic substance metabolic process;GO:0044707//single-multicellular organism process;GO:0032774//RNA biosynthetic process;GO:0009653//anatomical structure morphogenesis;GO:1901362//organic cyclic compound biosynthetic process;GO:1901360//organic cyclic compound metabolic process;GO:0044249//cellular biosynthetic process;GO:0044699//single-organism process;GO:0044237//cellular metabol…
Unigene0000034	58.3333333333333	56.3333333333333	0.6299	1.2310	2.2455	1.1552	1.8941	0.7636	1.3688	1.27096666666667	-0.106985471312518	0.867854468102493	1	no	gag-pol	PREDICTED: RNA-directed DNA polymerase from mobile element jockey-like [Danio rerio]	-	-	-	-
Unigene0000035	10.6666666666667	11.3333333333333	0.0622	0.6808	1.3443	0.4563	1.5161	0.2283	0.695766666666667	0.733566666666667	0.0763245213821559	0.964232704502254	1	no	-	--	-	-	-	-
Unigene0000036	173.333333333333	201.666666666667	1.9096	2.5244	1.4021	2.8627	2.0680	1.3779	1.94536666666667	2.10286666666667	0.112315275217829	0.817647050452928	1	no	LGI2	PREDICTED: leucine-rich repeat LGI family member 2-like [Cyprinus carpio]	-	-	-	-
Unigene0000037	11.6666666666667	26.3333333333333	0.6659	0.9275	0.6229	1.4432	2.8166	0.6109	0.738766666666667	1.62356666666667	1.1359759474345	0.104094437635984	1	no	-	PREDICTED: junctional adhesion molecule C-like isoform X2 [Sinocyclocheilus rhinocerous]	-	-	-	-
Unigene0000038	12.6666666666667	15.3333333333333	1.4883	0.7082	0.3329	0.7120	0.7169	1.4247	0.843133333333333	0.9512	0.173987917690702	0.846769822348134	1	no	-	--	-	-	-	-
Unigene0000039	15	15.3333333333333	0.1248	1.7067	1.1554	0.1716	2.4187	0.4578	0.995633333333333	1.01603333333333	0.0292612968599945	1	1	no	-	--	-	-	-	-
Unigene0000040	32	30.3333333333333	0.9080	0.9606	1.1524	0.9436	1.1065	0.6664	1.007	0.9055	-0.153277137056617	0.799336698865001	1	no	-	--	-	-	-	-
Unigene0000041	37	46.3333333333333	0.6032	1.1002	0.8966	0.4097	1.5592	1.1477	0.866666666666667	1.03886666666667	0.261461380908366	0.675698239720388	1	no	-	--	-	-	-	-
Unigene0000042	0.666666666666667	3	0.0000	0.1287	0.0000	0.0000	0.1954	0.3236	0.0429	0.173	2.01172248502454	0.251524453197537	1	no	-	--	-	-	-	-
Unigene0000043	105.333333333333	136.333333333333	0.9467	1.4555	1.3222	1.4779	1.8854	1.1891	1.24146666666667	1.51746666666667	0.289619300234603	0.538889324542595	1	no	Bscl2	PREDICTED: seipin-like isoform X2 [Sinocyclocheilus anshuiensis]	-	-	-	-
Unigene0000044	11	30.3333333333333	0.8813	0.2894	0.3174	0.8082	0.9276	2.1023	0.496033333333333	1.27936666666667	1.36692082230489	0.057584800380656	1	no	-	--	-	-	-	-
Unigene0000045	1.33333333333333	6.66666666666667	0.0520	0.1708	0.0000	0.4769	0.1728	0.3340	0.0742666666666667	0.3279	2.14246916977418	0.0564868299915877	1	no	-	--	-	-	-	-
Unigene0000046	2803.66666666667	3043.66666666667	67.0711	57.5308	76.1755	55.0629	77.0343	73.9954	66.9258	68.6975333333333	0.0376958190143714	0.913642330709147	1	no	POLR2F	PREDICTED: DNA-directed RNA polymerases I, II, and III subunit RPABC2 [Sinocyclocheilus rhinocerous]	ko01100//Metabolic pathways//Global and Overview//Metabolism;ko00230//Purine metabolism//Nucleotide metabolism//Metabolism;ko00240//Pyrimidine metabolism//Nucleotide metabolism//Metabolism;ko04623//Cytosolic DNA-sensing pathway//Immune system//Organismal Systems;ko03020//RNA polymerase//Transcription//Genetic Information Processing	GO:1990234//transferase complex;GO:0044446//intracellular organelle part;GO:0044464//cell part;GO:0070013//intracellular organelle lumen;GO:0044428//nuclear part;GO:0044424//intracellular part;GO:0061695//transferase complex, transferring phosphorus-containing groups;GO:0043234//protein complex;GO:0031974//membrane-enclosed lumen;GO:0044451//nucleoplasm part;GO:0044422//organelle part;GO:0005622/…	GO:0003676//nucleic acid binding;GO:0097159//organic cyclic compound binding;GO:0003899//DNA-directed RNA polymerase activity;GO:0034062//RNA polymerase activity;GO:0016772//transferase activity, transferring phosphorus-containing groups;GO:1901363//heterocyclic compound binding;GO:0016779//nucleotidyltransferase activity;GO:0016740//transferase activity;GO:0003824//catalytic activity;GO:0005488/…	GO:0071704//organic substance metabolic process;GO:0043170//macromolecule metabolic process;GO:0010467//gene expression;GO:0008152//metabolic process
Unigene0000047	2669	2810.66666666667	16.2741	15.1273	15.5898	13.0835	15.4439	17.8334	15.6637333333333	15.4536	-0.0194851482307912	0.954609630476039	1	no	fam91a1	protein FAM91A1 [Danio rerio]	-	-	-	-
Unigene0000048	714.666666666667	898.666666666667	5.8606	4.3909	3.7143	4.3592	4.6815	7.3151	4.65526666666667	5.45193333333333	0.227904109113956	0.568210967998507	1	no	PTK2B	PREDICTED: protein-tyrosine kinase 2-beta-like [Sinocyclocheilus grahami]	ko04020//Calcium signaling pathway//Signal transduction//Environmental Information Processing;ko04912//GnRH signaling pathway//Endocrine system//Organismal Systems	GO:0043226//organelle;GO:0043229//intracellular organelle;GO:0044424//intracellular part;GO:0005924//cell-substrate adherens junction;GO:0044464//cell part;GO:0030054//cell junction;GO:0005622//intracellular;GO:0030055//cell-substrate junction;GO:0043228//non-membrane-bounded organelle;GO:0005623//cell;GO:0043232//intracellular non-membrane-bounded organelle;GO:0005912//adherens junction;GO:00701…	GO:0097159//organic cyclic compound binding;GO:0016740//transferase activity;GO:0016772//transferase activity, transferring phosphorus-containing groups;GO:0005488//binding;GO:1901363//heterocyclic compound binding;GO:0032549//ribonucleoside binding;GO:0001883//purine nucleoside binding;GO:0003824//catalytic activity;GO:0097367//carbohydrate derivative binding;GO:0016301//kinase activity;GO:00600…	GO:0050789//regulation of biological process;GO:0043170//macromolecule metabolic process;GO:0008152//metabolic process;GO:0044238//primary metabolic process;GO:0006796//phosphate-containing compound metabolic process;GO:0006464//cellular protein modification process;GO:0006793//phosphorus metabolic process;GO:0036211//protein modification process;GO:0065007//biological regulation;GO:0009966//regu…
Unigene0000049	256.333333333333	182.333333333333	1.8828	3.6836	1.1916	1.8181	1.3013	1.2840	2.25266666666667	1.4678	-0.61797844744767	0.213112044274057	1	no	-	--	-	-	-	-
Unigene0000050	1255.66666666667	1587.66666666667	9.5546	7.6924	9.2592	10.4426	10.0811	10.8776	8.8354	10.4671	0.244494430898147	0.486288740240711	1	no	Tank	PREDICTED: TRAF family member-associated NF-kappa-B activator-like isoform X1 [Sinocyclocheilus grahami]	ko04622//RIG-I-like receptor signaling pathway//Immune system//Organismal Systems	-	-	-
Unigene0000051	25.3333333333333	15	0.6584	0.7206	2.0778	0.3623	0.7781	0.8054	1.15226666666667	0.6486	-0.829073706412775	0.240523656164617	1	no	-	--	-	-	-	-
Unigene0000052	52.3333333333333	54.3333333333333	2.7090	3.7061	2.8457	4.0366	2.9386	1.9675	3.08693333333333	2.9809	-0.0504263480886812	0.931026349610169	1	no	Znf235	PREDICTED: zinc finger protein 501-like [Sinocyclocheilus rhinocerous]	-	-	-	-
Unigene0000053	67	124	0.6048	0.7239	0.6515	1.4817	1.0364	0.8843	0.660066666666667	1.13413333333333	0.78090661035906	0.104593109947615	1	no	SYNE1	PREDICTED: nesprin-1-like [Sinocyclocheilus grahami]	-	-	-	-
Unigene0000054	4461.33333333333	4824.66666666667	15.3702	15.1586	11.9663	15.3955	14.5529	13.0734	14.1650333333333	14.3406	0.0177713898982646	0.957687456258767	1	no	-	Si:ch211-13c6.2 protein, partial [Danio rerio]	-	-	-	-
Unigene0000055	33.3333333333333	30	0.7483	0.7934	0.8903	1.1150	0.3886	0.4934	0.810666666666667	0.665666666666667	-0.284308895999613	0.657564337129711	1	no	-	--	-	-	-	-
Unigene0000056	15.6666666666667	13.3333333333333	0.5665	0.2067	1.5060	0.5195	0.4707	0.8229	0.759733333333333	0.604366666666667	-0.330069028870771	0.688971221416823	1	no	-	--	-	-	-	-
Unigene0000057	346	385.333333333333	14.5666	10.4658	11.7802	11.7857	12.2646	14.4014	12.2708666666667	12.8172333333333	0.0628477350601805	0.877000137563542	1	no	-	--	-	-	-	-
Unigene0000058	8.66666666666667	4.66666666666667	0.3110	0.4766	0.8962	0.5134	0.2067	0.1141	0.561266666666667	0.278066666666667	-1.01325556943527	0.257134752749636	1	no	-	--	-	-	-	-
Unigene0000059	2649.66666666667	2307.33333333333	33.2615	13.9200	42.4490	19.0386	18.0901	35.6595	29.8768333333333	24.2627333333333	-0.300285156641661	0.504299645990514	1	no	cfap97	PREDICTED: cilia- and flagella-associated protein 97-like [Sinocyclocheilus anshuiensis]	-	-	-	-
Unigene0000060	21	26.3333333333333	0.5261	1.0365	0.7580	1.2544	0.7383	0.6758	0.773533333333333	0.8895	0.201531143425713	0.758871182946654	1	no	-	--	-	-	-	-
Unigene0000061	14.6666666666667	16.3333333333333	0.4225	0.8785	0.6521	0.4261	0.4680	1.0853	0.651033333333333	0.6598	0.0192973656892612	0.999999999999996	1	no	-	--	-	-	-	-
Unigene0000062	18	30	1.7765	0.8408	0.0494	1.7611	1.8617	0.6607	0.8889	1.42783333333333	0.683734555632908	0.432542081372586	1	no	-	--	-	-	-	-
Unigene0000063	1484	1997	9.9712	13.0729	9.1707	15.5245	13.6241	11.2441	10.7382666666667	13.4642333333333	0.326370946362088	0.363581441498786	1	no	pi4k2a	phosphatidylinositol 4-kinase type 2-alpha [Danio rerio]	ko01100//Metabolic pathways//Global and Overview//Metabolism;ko04070//Phosphatidylinositol signaling system//Signal transduction//Environmental Information Processing;ko00562//Inositol phosphate metabolism//Carbohydrate metabolism//Metabolism	GO:0098590//plasma membrane region;GO:0005623//cell;GO:0043005//neuron projection;GO:0031082//BLOC complex;GO:0018995//host;GO:0031982//vesicle;GO:0043227//membrane-bounded organelle;GO:0044216//other organism cell;GO:0044424//intracellular part;GO:0044218//other organism cell membrane;GO:0044279//other organism membrane;GO:0044456//synapse part;GO:0044444//cytoplasmic part;GO:0097458//neuron par…	GO:0032403//protein complex binding;GO:0001883//purine nucleoside binding;GO:0003824//catalytic activity;GO:0032550//purine ribonucleoside binding;GO:0044877//macromolecular complex binding;GO:0016773//phosphotransferase activity, alcohol group as acceptor;GO:0036094//small molecule binding;GO:0016301//kinase activity;GO:0032549//ribonucleoside binding;GO:0005488//binding;GO:0097159//organic cycl…	GO:0006796//phosphate-containing compound metabolic process;GO:0044237//cellular metabolic process;GO:0009987//cellular process;GO:0008152//metabolic process;GO:0006793//phosphorus metabolic process
Unigene0000064	5.66666666666667	8	0.6255	0.0000	0.4506	1.2045	0.1386	0.0574	0.3587	0.466833333333333	0.380129832283187	0.803611522719188	1	no	-	--	-	-	-	-
Unigene0000065	1904.66666666667	2249	26.4064	33.1410	23.9065	23.2906	39.1247	30.8726	27.8179666666667	31.0959666666667	0.160710495267135	0.659647634753155	1	no	NSUN5	PREDICTED: probable 28S rRNA (cytosine-C(5))-methyltransferase isoform X3 [Sinocyclocheilus grahami]	-	-	GO:0003824//catalytic activity	GO:0008152//metabolic process
Unigene0000066	15.6666666666667	22	1.0069	0.5510	0.6594	1.0912	0.7606	1.0497	0.7391	0.967166666666667	0.387994949289784	0.543739763020695	1	no	-	--	-	-	-	-
Unigene0000067	17816.6666666667	18861.6666666667	161.1971	148.3835	145.9767	110.0456	175.1099	170.9013	151.852433333333	152.018933333333	0.00158098968640552	0.996346837070323	1	no	PRKAR1A	cAMP-dependent protein kinase type I-alpha regulatory subunit [Danio rerio]	ko04910//Insulin signaling pathway//Endocrine system//Organismal Systems;ko04210//Apoptosis//Cell growth and death//Cellular Processes	GO:0044424//intracellular part;GO:0005623//cell;GO:0005622//intracellular;GO:0044464//cell part	GO:0019207//kinase regulator activity;GO:0030234//enzyme regulator activity;GO:0019887//protein kinase regulator activity;GO:0098772//molecular function regulator	GO:0001932//regulation of protein phosphorylation;GO:0031323//regulation of cellular metabolic process;GO:0032268//regulation of cellular protein metabolic process;GO:0019220//regulation of phosphate metabolic process;GO:0031399//regulation of protein modification process;GO:0042325//regulation of phosphorylation;GO:0065007//biological regulation;GO:0051246//regulation of protein metabolic proces…
Unigene0000068	23	31	0.7470	1.9856	1.1531	1.7615	2.6602	0.5875	1.29523333333333	1.66973333333333	0.366405694290326	0.599615874106676	1	no	-	--	-	-	-	-
Unigene0000069	1.66666666666667	0.666666666666667	0.0588	0.0000	0.2420	0.0000	0.0000	0.1079	0.100266666666667	0.0359666666666667	-1.47910970218962	0.602348114087611	1	no	-	PREDICTED: nicalin-1-like [Cyprinus carpio]	-	-	-	-
Unigene0000070	2	5.33333333333333	0.0518	0.2833	0.0000	0.5696	0.1147	0.0950	0.1117	0.259766666666667	1.217587129799	0.354673432738855	1	no	-	PREDICTED: uroplakin-3a-like [Cyprinus carpio]	-	-	-	-
Unigene0000071	68	80.6666666666667	1.4211	1.4239	1.4006	1.9823	1.3527	1.3405	1.4152	1.5585	0.139152201822272	0.774785188047884	1	no	-	--	-	-	-	-
Unigene0000072	54.3333333333333	60.6666666666667	1.5076	2.8086	1.1883	2.0296	2.3454	1.3831	1.83483333333333	1.91936666666667	0.0649813213058767	0.914323974671455	1	no	-	--	-	-	-	-
Unigene0000073	8	10.3333333333333	0.9168	0.1254	0.3538	0.7356	0.4443	0.5257	0.465333333333333	0.568533333333333	0.288980401662161	0.737910977627181	1	no	-	--	-	-	-	-
Unigene0000074	16.3333333333333	16	0.7037	1.3478	2.4440	1.5325	1.4617	1.1298	1.4985	1.37466666666667	-0.124437251866619	0.856610687908156	1	no	-	PREDICTED: SLAM family member 9-like [Sinocyclocheilus rhinocerous]	-	-	-	-
Unigene0000075	7	22.6666666666667	0.2735	0.3492	0.3753	1.2958	0.5555	1.0873	0.332666666666667	0.979533333333333	1.55801727312513	0.0259845406057659	0.999025680651727	no	MOB3B	PREDICTED: MOB kinase activator 3B-like [Cyprinus carpio]	-	-	-	-
Unigene0000076	14	6.66666666666667	1.0783	0.7637	0.9138	0.0582	0.2811	0.8729	0.9186	0.404066666666667	-1.18484344173364	0.172777520112716	1	no	-	--	-	-	-	-
Unigene0000077	122.666666666667	138.666666666667	6.1413	7.5469	6.9850	5.2856	10.9814	6.1778	6.89106666666667	7.4816	0.118619520325049	0.812266724705085	1	no	-	--	-	-	-	-
Unigene0000078	1090.66666666667	1025.33333333333	14.7036	14.6179	10.5735	11.9680	13.3301	10.0499	13.2983333333333	11.7826666666667	-0.17457935702303	0.63746033922815	1	no	TRAM2	PREDICTED: translocating chain-associated membrane protein 2-like isoform X1 [Cyprinus carpio]	-	GO:0016020//membrane;GO:0044425//membrane part;GO:0031224//intrinsic component of membrane	-	-
Unigene0000079	16.3333333333333	24.3333333333333	1.1647	0.9915	1.1320	1.4240	1.4337	1.7216	1.09606666666667	1.52643333333333	0.477829030704504	0.422158650832232	1	no	-	--	-	-	-	-
Unigene0000080	3	3	0.0000	0.2941	0.2212	0.2957	0.0595	0.0986	0.171766666666667	0.151266666666667	-0.183355983480691	1	1	no	-	PREDICTED: uncharacterized protein LOC107583085 [Sinocyclocheilus grahami]	-	-	-	-
Unigene0000081	455.666666666667	417	30.5475	23.9184	31.0002	22.6968	19.5963	30.3512	28.4887	24.2147666666667	-0.234502688712721	0.55845760425476	1	no	-	--	-	-	-	-
Unigene0000082	21	21.3333333333333	1.6592	1.4917	0.7318	1.5215	1.4443	0.7611	1.29423333333333	1.2423	-0.0590841312742742	0.941491350452458	1	no	-	--	-	-	-	-
Unigene0000083	7.33333333333333	32	0.0000	1.1574	0.3201	2.9661	1.9985	0.8560	0.4925	1.9402	1.97800974651222	0.0330687641439639	1	no	-	--	-	-	-	-
Unigene0000084	147.666666666667	171.333333333333	2.8016	1.8134	2.2785	1.4779	3.1038	3.0539	2.29783333333333	2.5452	0.147504866617894	0.760051284886937	1	no	-	--	-	-	-	-
Unigene0000085	8.66666666666667	6.66666666666667	0.4582	0.4299	0.8757	0.3601	0.3626	0.5405	0.587933333333333	0.421066666666667	-0.481603904444904	0.549010341939053	1	no	-	--	-	-	-	-
Unigene0000086	17.3333333333333	20.6666666666667	0.5729	0.5788	1.2244	0.9698	1.0740	0.6468	0.792033333333333	0.896866666666667	0.179332373266035	0.808642204023817	1	no	-	--	-	-	-	-
Unigene0000087	4.33333333333333	5.66666666666667	0.2932	0.4493	0.0603	0.2689	0.5847	0.1614	0.2676	0.338333333333333	0.338367205597282	0.841712162746944	1	no	-	--	-	-	-	-
Unigene0000088	14.3333333333333	8	0.5737	0.8895	0.6888	0.3069	0.5297	0.3070	0.717333333333333	0.3812	-0.912095552812888	0.198144601191725	1	no	-	--	-	-	-	-
Unigene0000089	17.6666666666667	19.3333333333333	0.7613	0.3947	1.0308	0.8450	0.5327	0.8455	0.728933333333333	0.741066666666667	0.0238164590009798	1	1	no	-	--	-	-	-	-
Unigene0000090	17.3333333333333	16.6666666666667	0.7149	0.6846	1.0115	1.5159	0.1980	0.3689	0.803666666666667	0.694266666666667	-0.211107339099639	0.78979416051454	1	no	-	--	-	-	-	-
Unigene0000091	25	11.6666666666667	0.9667	2.0538	1.4629	1.0950	0.8820	0.0000	1.49446666666667	0.659	-1.18128034843585	0.165808074533911	1	no	-	--	-	-	-	-
Unigene0000092	332.666666666667	207.333333333333	17.3217	14.9557	17.5279	8.9124	10.9276	9.4907	16.6017666666667	9.7769	-0.763887771410771	0.0612580950236353	1	no	-	--	-	-	-	-
Unigene0000093	18.3333333333333	31	1.2365	1.5670	0.9376	3.1629	2.1630	0.5971	1.24703333333333	1.97433333333333	0.662865556337223	0.342675312713464	1	no	-	--	-	-	-	-
Unigene0000094	60	54.6666666666667	3.2347	4.4933	3.9688	3.1943	4.0659	2.7963	3.89893333333333	3.35216666666667	-0.217985606444927	0.674266863208651	1	no	-	--	-	-	-	-
Unigene0000095	44.6666666666667	74	0.5404	1.1471	0.6236	1.4567	1.2882	0.8113	0.770366666666667	1.1854	0.621756777578424	0.255709839227883	1	no	tc1a	transposase [Rana pipiens]	-	-	-	-
Unigene0000096	13.6666666666667	21.6666666666667	0.8936	1.1084	0.5517	1.7480	1.4519	0.6012	0.851233333333333	1.26703333333333	0.573827928288198	0.424774038299909	1	no	-	--	-	-	-	-
Unigene0000097	899	1355	5.5586	14.6308	7.6839	22.5600	7.2857	7.8918	9.2911	12.5791666666667	0.437115034378062	0.389653542491921	1	no	Rdh7	PREDICTED: retinol dehydrogenase 7-like [Cyprinus carpio]	-	-	GO:0016616//oxidoreductase activity, acting on the CH-OH group of donors, NAD or NADP as acceptor;GO:0016491//oxidoreductase activity;GO:0016614//oxidoreductase activity, acting on CH-OH group of donors;GO:0003824//catalytic activity	GO:0030154//cell differentiation;GO:0007275//multicellular organism development;GO:0071704//organic substance metabolic process;GO:0048762//mesenchymal cell differentiation;GO:0048729//tissue morphogenesis;GO:0002009//morphogenesis of an epithelium;GO:0003008//system process;GO:0014031//mesenchymal cell development;GO:0007507//heart development;GO:0006720//isoprenoid metabolic process;GO:0048513/…
Unigene0000098	68.3333333333333	92	0.8837	1.6182	1.1543	1.6986	1.5627	1.3097	1.21873333333333	1.52366666666667	0.322164828656404	0.511661216784417	1	no	GDPD1	PREDICTED: glycerophosphodiester phosphodiesterase domain-containing protein 1-like isoform X2 [Sinocyclocheilus rhinocerous]	-	-	GO:0016787//hydrolase activity;GO:0003824//catalytic activity;GO:0016788//hydrolase activity, acting on ester bonds;GO:0042578//phosphoric ester hydrolase activity;GO:0008081//phosphoric diester hydrolase activity	GO:0044238//primary metabolic process;GO:0044763//single-organism cellular process;GO:0044710//single-organism metabolic process;GO:0044699//single-organism process;GO:0006066//alcohol metabolic process;GO:0044237//cellular metabolic process;GO:0019751//polyol metabolic process;GO:0009987//cellular process;GO:1901615//organic hydroxy compound metabolic process;GO:0044723//single-organism carbohyd…
Unigene0000099	1926	2026.66666666667	16.7793	12.9550	16.9776	13.1953	13.7104	18.9969	15.5706333333333	15.3008666666667	-0.0252142551382501	0.944254094638906	1	no	GPSM2	PREDICTED: G-protein-signaling modulator 2-like isoform X1 [Sinocyclocheilus anshuiensis]	-	-	GO:0030234//enzyme regulator activity;GO:0098772//molecular function regulator;GO:0060589//nucleoside-triphosphatase regulator activity	GO:0040001//establishment of mitotic spindle localization;GO:0044699//single-organism process;GO:0051716//cellular response to stimulus;GO:1902580//single-organism cellular localization;GO:0007049//cell cycle;GO:0007154//cell communication;GO:0050794//regulation of cellular process;GO:0000278//mitotic cell cycle;GO:0071840//cellular component organization or biogenesis;GO:0051293//establishment o…
Unigene0000100	14.3333333333333	15.6666666666667	0.4224	0.6401	0.4013	0.3873	0.5400	0.5664	0.487933333333333	0.4979	0.0291719705658847	1	1	no	-	--	-	-	-	-
Unigene0000101	17	22.6666666666667	1.2054	1.0194	0.6766	1.2560	1.1533	1.2063	0.967133333333333	1.2052	0.317485873118145	0.645387178494149	1	no	-	--	-	-	-	-
Unigene0000102	59.3333333333333	83	0.3813	0.9896	0.6726	1.0689	0.7000	0.8395	0.681166666666667	0.869466666666667	0.352122881488958	0.506608092122788	1	no	Cers1	PREDICTED: ceramide synthase 1-like [Sinocyclocheilus anshuiensis]	ko01100//Metabolic pathways//Global and Overview//Metabolism;ko00600//Sphingolipid metabolism//Lipid metabolism//Metabolism	-	-	-
Unigene0000103	1632.66666666667	2019	16.5882	16.5255	11.2816	12.3924	21.2135	18.4219	14.7984333333333	17.3426	0.228875753346928	0.541405383325403	1	no	Pnpla2	PREDICTED: patatin-like phospholipase domain-containing protein 2 [Sinocyclocheilus anshuiensis]	ko01100//Metabolic pathways//Global and Overview//Metabolism;ko00561//Glycerolipid metabolism//Lipid metabolism//Metabolism	-	-	-
Unigene0000104	3	10.3333333333333	0.1958	0.2857	0.1343	1.4364	0.0000	0.4192	0.205266666666667	0.618533333333333	1.59135197880502	0.169509693833554	1	no	-	--	-	-	-	-
Unigene0000105	4.33333333333333	6.33333333333333	0.2396	0.1966	0.3698	0.1647	0.3317	0.6044	0.268666666666667	0.366933333333333	0.449700631286765	0.661759972071189	1	no	-	--	-	-	-	-
Unigene0000106	83	70	7.3940	9.8091	11.8745	8.5265	7.8192	6.5779	9.69253333333333	7.6412	-0.343074569736797	0.488801468828371	1	no	-	--	-	-	-	-
Unigene0000107	24.3333333333333	32.3333333333333	2.1531	1.0801	3.5082	1.8098	2.3854	4.1976	2.24713333333333	2.7976	0.316103971987874	0.641583006743414	1	no	-	--	-	-	-	-
Unigene0000108	412.333333333333	454	22.0814	12.1102	27.6672	14.3739	16.9897	32.1902	20.6196	21.1846	0.038999542400131	0.935144211882357	1	no	-	--	-	-	-	-
Unigene0000109	834.666666666667	860	53.3987	32.4815	55.3440	35.1327	36.3304	64.1323	47.0747333333333	45.1984666666667	-0.0586790915256285	0.888528229362248	1	no	-	--	-	-	-	-
Unigene0000110	47.3333333333333	59.6666666666667	1.1978	0.6555	0.6515	1.1140	0.8151	1.0204	0.834933333333333	0.983166666666667	0.235774995577294	0.660952909969122	1	no	-	--	-	-	-	-
Unigene0000111	22.3333333333333	32.3333333333333	0.3149	0.5909	0.6713	0.8664	0.4486	0.7636	0.5257	0.692866666666667	0.398338015943111	0.524280535281611	1	no	-	--	-	-	-	-
Unigene0000112	5.66666666666667	9	0.1298	0.4261	0.6010	0.8926	0.2876	0.4763	0.385633333333333	0.552166666666667	0.517874037105839	0.625229963760326	1	no	-	--	-	-	-	-
Unigene0000113	4.66666666666667	8	0.1276	0.2793	0.5252	0.0585	0.2827	1.1119	0.3107	0.484366666666667	0.640577343041129	0.597838206404437	1	no	-	--	-	-	-	-
Unigene0000114	26	41	0.7099	0.8080	0.7890	0.6770	1.8246	1.0160	0.768966666666667	1.17253333333333	0.608635970543449	0.307035329305443	1	no	GABRG1	PREDICTED: gamma-aminobutyric acid receptor subunit gamma-1-like [Sinocyclocheilus grahami]	ko04080//Neuroactive ligand-receptor interaction//Signaling molecules and interaction//Environmental Information Processing	GO:0044425//membrane part;GO:0016020//membrane;GO:0031224//intrinsic component of membrane	GO:0005215//transporter activity;GO:0022838//substrate-specific channel activity;GO:0099600//transmembrane receptor activity;GO:0022891//substrate-specific transmembrane transporter activity;GO:0022857//transmembrane transporter activity;GO:0015276//ligand-gated ion channel activity;GO:0022892//substrate-specific transporter activity;GO:0022836//gated channel activity;GO:0005216//ion channel acti…	GO:0051234//establishment of localization;GO:0006811//ion transport;GO:0023052//signaling;GO:0006810//transport;GO:0009987//cellular process;GO:0007186//G-protein coupled receptor signaling pathway;GO:1902578//single-organism localization;GO:0051716//cellular response to stimulus;GO:0051179//localization;GO:0050794//regulation of cellular process;GO:0044763//single-organism cellular process;GO:00…
Unigene0000115	6	5.33333333333333	0.6643	0.1454	0.4101	0.4264	0.2208	0.3656	0.4066	0.3376	-0.268295311137547	0.836096244308673	1	no	-	--	-	-	-	-
Unigene0000116	14.6666666666667	21	0.8819	1.4157	0.4235	1.4017	1.8889	0.4315	0.907033333333333	1.2407	0.451926839782469	0.551192420661154	1	no	ywhag1	PREDICTED: 14-3-3 protein gamma-like, partial [Anolis carolinensis]	ko04110//Cell cycle//Cell growth and death//Cellular Processes;ko04114//Oocyte meiosis//Cell growth and death//Cellular Processes	-	-	-
Unigene0000117	18.3333333333333	28.6666666666667	0.7155	1.1056	0.6064	1.6596	1.1191	0.7337	0.809166666666667	1.1708	0.532985855935989	0.390162129097378	1	no	-	--	-	-	-	-
Unigene0000118	332.666666666667	347.666666666667	2.4153	1.8913	2.5885	2.0740	2.3653	2.3505	2.29836666666667	2.26326666666667	-0.0222023962286076	0.958153194935571	1	no	Prickle1	PREDICTED: prickle-like protein 1 [Sinocyclocheilus anshuiensis]	ko04310//Wnt signaling pathway//Signal transduction//Environmental Information Processing	-	GO:0043169//cation binding;GO:0043167//ion binding;GO:0046872//metal ion binding;GO:0005488//binding;GO:0046914//transition metal ion binding	GO:0007420//brain development;GO:0044699//single-organism process;GO:0032501//multicellular organismal process;GO:0007417//central nervous system development;GO:0060322//head development;GO:0051179//localization;GO:0048870//cell motility;GO:0048856//anatomical structure development;GO:0044763//single-organism cellular process;GO:0007399//nervous system development;GO:0051674//localization of cell…
Unigene0000119	23.3333333333333	23.6666666666667	0.7424	1.1284	1.1459	0.7185	0.8681	1.2486	1.00556666666667	0.945066666666667	-0.0895207237627162	0.887644597644078	1	no	-	--	-	-	-	-
Unigene0000120	61.6666666666667	94.6666666666667	0.8557	1.2018	0.7044	1.4515	1.2955	1.1906	0.920633333333333	1.31253333333333	0.511655477967283	0.295889417973581	1	no	Kazn	PREDICTED: kazrin-like [Sinocyclocheilus grahami]	-	-	-	-
Unigene0000121	5	12.3333333333333	0.2375	0.3640	0.1467	0.9584	0.3158	0.3923	0.2494	0.5555	1.15532544644678	0.17830988276727	1	no	-	--	-	-	-	-
Unigene0000122	301.333333333333	447.666666666667	1.3249	1.4714	1.8011	1.6901	1.9769	2.6956	1.53246666666667	2.12086666666667	0.468798231675393	0.25236397068102	1	no	ARHGEF10L	PREDICTED: rho guanine nucleotide exchange factor 10-like protein [Cyprinus carpio]	-	-	-	-
Unigene0000123	1.66666666666667	7	0.0000	0.2214	0.1388	0.7419	0.0000	0.5567	0.120066666666667	0.432866666666667	1.8500870281209	0.169475802840473	1	no	-	--	-	-	-	-
Unigene0000124	13.6666666666667	18	0.7485	1.1606	0.7703	1.5444	1.2439	0.5150	0.893133333333333	1.1011	0.301998025550169	0.679165776485107	1	no	-	PREDICTED: transcription elongation factor A protein 3-like isoform X5 [Sinocyclocheilus rhinocerous]	-	GO:0005623//cell;GO:0043227//membrane-bounded organelle;GO:0044464//cell part;GO:0043231//intracellular membrane-bounded organelle;GO:0044424//intracellular part;GO:0043229//intracellular organelle;GO:0005622//intracellular;GO:0043226//organelle	GO:0043167//ion binding;GO:0003676//nucleic acid binding;GO:0043169//cation binding;GO:0003723//RNA binding;GO:0005488//binding;GO:0008135//translation factor activity, RNA binding;GO:0097159//organic cyclic compound binding;GO:1901363//heterocyclic compound binding;GO:0046872//metal ion binding;GO:0046914//transition metal ion binding	GO:0044238//primary metabolic process;GO:0044237//cellular metabolic process;GO:0090304//nucleic acid metabolic process;GO:0006412//translation;GO:0009987//cellular process;GO:0006725//cellular aromatic compound metabolic process;GO:0006366//transcription from RNA polymerase II promoter;GO:0008152//metabolic process;GO:0044267//cellular protein metabolic process;GO:0044260//cellular macromolecule…
Unigene0000125	3912	4040	71.3131	70.1830	59.7125	53.1633	81.0499	62.9895	67.0695333333333	65.7342333333333	-0.0290126652123901	0.932769410537991	1	no	TSNAX	translin-associated protein X [Danio rerio]	-	-	GO:0003676//nucleic acid binding;GO:0003677//DNA binding;GO:0097159//organic cyclic compound binding;GO:1901363//heterocyclic compound binding;GO:0005488//binding	-
Unigene0000126	2.33333333333333	2	0.0000	0.1217	0.2861	0.1020	0.1232	0.1020	0.135933333333333	0.109066666666667	-0.31768902707484	1	1	no	-	--	-	-	-	-
Unigene0000127	13.6666666666667	2	0.2441	0.6011	1.7583	0.0560	0.1352	0.1680	0.867833333333333	0.119733333333333	-2.85759315153647	0.00673520577114045	0.616005974114452	no	-	--	-	-	-	-
Unigene0000128	1542.66666666667	1826.66666666667	15.8613	18.2430	16.4516	15.5633	22.7054	18.3313	16.8519666666667	18.8666666666667	0.16292258498343	0.645520174730212	1	no	Pdhx	PREDICTED: pyruvate dehydrogenase protein X component, mitochondrial isoform X1 [Sinocyclocheilus grahami]	ko01100//Metabolic pathways//Global and Overview//Metabolism;ko00010//Glycolysis / Gluconeogenesis//Carbohydrate metabolism//Metabolism;ko00620//Pyruvate metabolism//Carbohydrate metabolism//Metabolism;ko00020//Citrate cycle (TCA cycle)//Carbohydrate metabolism//Metabolism	-	GO:0016740//transferase activity;GO:0003824//catalytic activity	-
Unigene0000129	200.333333333333	279.666666666667	1.0014	1.8310	1.0242	1.3773	2.4825	1.2660	1.28553333333333	1.7086	0.410447668372968	0.382810399244225	1	no	EML1	PREDICTED: echinoderm microtubule-associated protein-like 1 isoform X5 [Sinocyclocheilus rhinocerous]	-	-	-	-
Unigene0000130	10.6666666666667	34.3333333333333	0.3402	0.4062	0.2865	1.4182	0.8567	0.7946	0.3443	1.02316666666667	1.57130308309863	0.0109711758678583	0.739700578108048	no	-	--	-	-	-	-
Unigene0000131	5.33333333333333	8.33333333333333	0.5926	0.3603	0.1355	1.0868	0.2188	0.2416	0.3628	0.515733333333333	0.507450838227162	0.628435576876265	1	no	-	--	-	-	-	-
Unigene0000132	14.3333333333333	19	0.1027	0.8240	0.6339	0.7531	0.6066	0.5337	0.5202	0.631133333333333	0.278878422120931	0.717783635281618	1	no	-	--	-	-	-	-
Unigene0000133	376.333333333333	352	5.5424	4.3893	4.6396	3.6318	4.0152	5.1076	4.8571	4.25153333333333	-0.192111940355723	0.632562657709898	1	no	sdhdb	PREDICTED: succinate dehydrogenase [ubiquinone] cytochrome b small subunit B, mitochondrial-like [Sinocyclocheilus anshuiensis]	ko01100//Metabolic pathways//Global and Overview//Metabolism;ko01110//Biosynthesis of secondary metabolites//Global and Overview//Metabolism;ko01130//Biosynthesis of antibiotics//Global and Overview//Metabolism;ko01120//Microbial metabolism in diverse environments//Global and Overview//Metabolism;ko00190//Oxidative phosphorylation//Energy metabolism//Metabolism;ko01200//Carbon metabolism//Global …	GO:0005622//intracellular;GO:0044429//mitochondrial part;GO:0044455//mitochondrial membrane part;GO:0031975//envelope;GO:0044424//intracellular part;GO:0031966//mitochondrial membrane;GO:0031090//organelle membrane;GO:0043229//intracellular organelle;GO:0044446//intracellular organelle part;GO:0016020//membrane;GO:0005746//mitochondrial respiratory chain;GO:0044422//organelle part;GO:0043226//org…	GO:0048038//quinone binding;GO:0046906//tetrapyrrole binding;GO:0048037//cofactor binding;GO:1901363//heterocyclic compound binding;GO:0005488//binding;GO:0097159//organic cyclic compound binding	GO:0044710//single-organism metabolic process;GO:0044699//single-organism process;GO:0008152//metabolic process;GO:0055114//oxidation-reduction process
Unigene0000134	75.6666666666667	47.6666666666667	7.7100	4.8889	1.7631	2.4689	1.6948	4.1542	4.78733333333333	2.77263333333333	-0.787965421887971	0.20618879506846	1	no	-	--	-	-	-	-
Unigene0000135	191.666666666667	479.666666666667	2.2102	4.6180	1.8757	12.8971	3.9114	2.8045	2.9013	6.53766666666667	1.17207634018806	0.0468054788330805	1	no	Chi3l1	PREDICTED: acidic mammalian chitinase isoform X1 [Sinocyclocheilus rhinocerous]	-	-	-	-
Unigene0000136	23	11.3333333333333	0.9300	1.3086	2.5292	0.9746	0.8095	0.4266	1.58926666666667	0.7369	-1.10882045930671	0.11042666931021	1	no	-	--	-	-	-	-
Unigene0000137	28.3333333333333	40.6666666666667	0.2436	0.7702	1.3926	1.1416	0.8695	1.1670	0.802133333333333	1.05936666666667	0.401288048163762	0.534735879826167	1	no	-	--	-	-	-	-
Unigene0000138	18.3333333333333	17.3333333333333	0.9934	1.0873	1.7039	1.7005	1.1006	0.5468	1.26153333333333	1.11596666666667	-0.176884391689891	0.80273510327094	1	no	-	--	-	-	-	-
Unigene0000139	0.666666666666667	3	0.0000	0.0000	0.0958	0.0853	0.1031	0.2134	0.0319333333333333	0.133933333333333	2.06838000299711	0.181313748653027	1	no	-	--	-	-	-	-
Unigene0000140	554.333333333333	564.666666666667	9.0383	7.2223	8.0386	5.9476	7.3419	9.8831	8.09973333333333	7.7242	-0.0684888911137789	0.862733857826377	1	no	b9d2	PREDICTED: B9 domain-containing protein 2-like [Sinocyclocheilus grahami]	-	GO:0044430//cytoskeletal part;GO:0043232//intracellular non-membrane-bounded organelle;GO:0044463//cell projection part;GO:0044446//intracellular organelle part;GO:0035869//ciliary transition zone;GO:0043228//non-membrane-bounded organelle;GO:0015630//microtubule cytoskeleton;GO:0005856//cytoskeleton;GO:0044464//cell part;GO:0044424//intracellular part;GO:0043229//intracellular organelle;GO:00315…	GO:0008092//cytoskeletal protein binding;GO:0015631//tubulin binding;GO:0005488//binding;GO:0005515//protein binding	GO:0044763//single-organism cellular process;GO:0044767//single-organism developmental process;GO:0071702//organic substance transport;GO:0071840//cellular component organization or biogenesis;GO:0015031//protein transport;GO:0006810//transport;GO:0016043//cellular component organization;GO:0010927//cellular component assembly involved in morphogenesis;GO:0009987//cellular process;GO:0008104//pro…
Unigene0000141	491	433	5.1043	1.5421	6.0861	3.5278	2.5984	4.3732	4.24416666666667	3.4998	-0.278208831416182	0.578401412510386	1	no	Sertad4	PREDICTED: SERTA domain-containing protein 4-like [Mesocricetus auratus]	-	-	-	-
Unigene0000142	6.66666666666667	6.66666666666667	0.1282	0.5144	0.2638	0.1959	0.5207	0.1568	0.302133333333333	0.291133333333333	-0.0535053300402604	1	1	no	-	PREDICTED: cysteine-rich motor neuron 1 protein-like [Cyprinus carpio]	-	-	GO:0030234//enzyme regulator activity;GO:0004857//enzyme inhibitor activity;GO:0098772//molecular function regulator	GO:0043086//negative regulation of catalytic activity;GO:0048519//negative regulation of biological process;GO:0044092//negative regulation of molecular function;GO:0065009//regulation of molecular function;GO:0065007//biological regulation;GO:0050789//regulation of biological process;GO:0009892//negative regulation of metabolic process;GO:0019222//regulation of metabolic process;GO:0050790//regu…
Unigene0000143	627	680.333333333333	5.6647	5.8917	4.6618	5.2172	6.0188	5.3033	5.40606666666667	5.5131	0.0282844671119911	0.940998571843338	1	no	Pomt1	PREDICTED: protein O-mannosyl-transferase 1-like [Cyprinus carpio]	ko01100//Metabolic pathways//Global and Overview//Metabolism;ko00514//Other types of O-glycan biosynthesis//Glycan biosynthesis and metabolism//Metabolism	-	GO:0000030//mannosyltransferase activity;GO:0016757//transferase activity, transferring glycosyl groups;GO:0016740//transferase activity;GO:0016758//transferase activity, transferring hexosyl groups;GO:0003824//catalytic activity	GO:0043170//macromolecule metabolic process;GO:0044763//single-organism cellular process;GO:0043413//macromolecule glycosylation;GO:0044699//single-organism process;GO:0044723//single-organism carbohydrate metabolic process;GO:0044267//cellular protein metabolic process;GO:0008152//metabolic process;GO:0005975//carbohydrate metabolic process;GO:0034645//cellular macromolecule biosynthetic process…
Unigene0000144	50.6666666666667	70.3333333333333	0.6975	0.7302	0.9675	1.2792	0.8568	0.9460	0.7984	1.02733333333333	0.363720735343726	0.475910571936613	1	no	Nrcam	PREDICTED: neuronal cell adhesion molecule-like isoform X2 [Sinocyclocheilus anshuiensis]	ko04514//Cell adhesion molecules (CAMs)//Signaling molecules and interaction//Environmental Information Processing	-	-	-
Unigene0000145	80.3333333333333	59	3.2892	3.1383	4.1224	2.4747	2.5694	2.2438	3.51663333333333	2.4293	-0.533654255402638	0.268434912876247	1	no	-	--	-	-	-	-
Unigene0000146	2965	3565	8.6901	9.0877	9.7448	8.9071	11.3347	10.8930	9.1742	10.3782666666667	0.177911247101218	0.596238953564066	1	no	KDM6B	PREDICTED: LOW QUALITY PROTEIN: lysine-specific demethylase 6B-like [Cyprinus carpio]	-	-	-	-
Unigene0000147	9.33333333333333	16	0.5790	1.1266	0.1986	0.4130	1.2117	1.4166	0.634733333333333	1.01376666666667	0.67550311946888	0.397541955774638	1	no	-	--	-	-	-	-
Unigene0000148	162.333333333333	127.333333333333	3.8751	2.7154	5.3007	3.1200	4.1884	1.6909	3.96373333333333	2.99976666666667	-0.402009619369113	0.42655828698874	1	no	-	--	-	-	-	-
Unigene0000149	818	912	7.5639	6.7784	7.7480	5.6871	6.6211	10.5999	7.36343333333333	7.63603333333333	0.0524447948188303	0.89443054636685	1	no	KLF9	PREDICTED: Krueppel-like factor 9 [Sinocyclocheilus rhinocerous]	-	-	GO:0005488//binding;GO:0043167//ion binding;GO:0043169//cation binding	-
Unigene0000150	3316.33333333333	3276.66666666667	25.4283	22.2366	20.7918	20.2839	19.6520	23.2129	22.8189	21.0496	-0.116436428846115	0.728425042640585	1	no	RPS6KB1	PREDICTED: ribosomal protein S6 kinase beta-1-like [Sinocyclocheilus anshuiensis]	ko04910//Insulin signaling pathway//Endocrine system//Organismal Systems;ko04012//ErbB signaling pathway//Signal transduction//Environmental Information Processing;ko04350//TGF-beta signaling pathway//Signal transduction//Environmental Information Processing;ko04150//mTOR signaling pathway//Signal transduction//Environmental Information Processing	-	GO:0001883//purine nucleoside binding;GO:0016772//transferase activity, transferring phosphorus-containing groups;GO:0097159//organic cyclic compound binding;GO:0036094//small molecule binding;GO:0032549//ribonucleoside binding;GO:0016773//phosphotransferase activity, alcohol group as acceptor;GO:0016740//transferase activity;GO:0003824//catalytic activity;GO:0016301//kinase activity;GO:0032550//…	GO:0006793//phosphorus metabolic process;GO:0044267//cellular protein metabolic process;GO:0008152//metabolic process;GO:0007154//cell communication;GO:0044763//single-organism cellular process;GO:0044238//primary metabolic process;GO:0044260//cellular macromolecule metabolic process;GO:0071704//organic substance metabolic process;GO:0019538//protein metabolic process;GO:0043170//macromolecule me…
Unigene0000151	6236.33333333333	8916	153.5105	282.1050	108.7260	309.3489	256.9987	155.6882	181.447166666667	240.6786	0.407558340886879	0.329351669603689	1	no	CNFN	plac8 onzin related protein 1 [Danio rerio]	-	-	-	GO:0032502//developmental process;GO:0007275//multicellular organism development;GO:0044767//single-organism developmental process;GO:0048856//anatomical structure development;GO:0048731//system development;GO:0044707//single-multicellular organism process;GO:0044699//single-organism process;GO:0032501//multicellular organismal process;GO:0009653//anatomical structure morphogenesis
Unigene0000152	475.666666666667	322	14.6353	9.8648	20.5314	9.2176	7.0745	11.9972	15.0105	9.42976666666667	-0.670678056033357	0.12493584283993	1	no	-	--	-	-	-	-
Unigene0000153	83	70.6666666666667	10.8491	1.5188	3.5700	3.8174	5.8699	3.5878	5.31263333333333	4.42503333333333	-0.263738821586081	0.690903246006395	1	no	-	--	-	-	-	-
Unigene0000154	14442.6666666667	13620	94.7950	88.6851	75.5193	61.3023	92.7144	77.5006	86.3331333333333	77.1724333333333	-0.161828753668426	0.62960555022351	1	no	Kpnb1	PREDICTED: importin subunit beta-1 isoform X1 [Sinocyclocheilus rhinocerous]	ko03013//RNA transport//Translation//Genetic Information Processing	-	-	-
Unigene0000155	161.666666666667	181.666666666667	0.9661	2.8954	0.7898	1.7552	1.9905	1.1100	1.55043333333333	1.61856666666667	0.0620452962854309	0.915748362685289	1	no	slc17a8	PREDICTED: vesicular glutamate transporter 3 [Cyprinus carpio]	-	GO:0044456//synapse part;GO:0042995//cell projection;GO:0005623//cell;GO:0005622//intracellular;GO:0031410//cytoplasmic vesicle;GO:0005737//cytoplasm;GO:0043226//organelle;GO:0045202//synapse;GO:0031982//vesicle;GO:0016023//cytoplasmic, membrane-bounded vesicle;GO:0043229//intracellular organelle;GO:0099503//secretory vesicle;GO:0044444//cytoplasmic part;GO:0043231//intracellular membrane-bounded…	GO:0022804//active transmembrane transporter activity;GO:0015291//secondary active transmembrane transporter activity;GO:0005215//transporter activity;GO:0022857//transmembrane transporter activity	GO:0044765//single-organism transport;GO:0023052//signaling;GO:0044699//single-organism process;GO:0044763//single-organism cellular process;GO:0050877//neurological system process;GO:0006810//transport;GO:0003008//system process;GO:0007154//cell communication;GO:0007600//sensory perception;GO:0032501//multicellular organismal process;GO:0009987//cellular process;GO:0050896//response to stimulus;…
Unigene0000156	17.6666666666667	20.6666666666667	0.9098	0.6970	0.8894	1.0429	0.5544	1.0851	0.832066666666667	0.894133333333333	0.103790858111184	0.865145641407304	1	no	MAP1B	PREDICTED: electromotor neuron-associated protein 1-like, partial [Sinocyclocheilus grahami]	-	-	-	-
Unigene0000157	1377.66666666667	1845	13.3214	31.4092	13.5299	26.4503	29.4275	16.9482	19.4201666666667	24.2753333333333	0.321935523718177	0.45483697492583	1	no	Prss16	Zgc:158605 [Danio rerio]	-	-	GO:0003824//catalytic activity;GO:0016787//hydrolase activity;GO:0008233//peptidase activity;GO:0070011//peptidase activity, acting on L-amino acid peptides	GO:0071704//organic substance metabolic process;GO:0008152//metabolic process;GO:0051604//protein maturation;GO:0044238//primary metabolic process;GO:0019538//protein metabolic process;GO:0016485//protein processing;GO:0006508//proteolysis;GO:0043170//macromolecule metabolic process;GO:0010467//gene expression
Unigene0000158	998	1356.66666666667	5.4755	6.1377	6.3338	5.9396	10.3143	7.0148	5.98233333333333	7.75623333333333	0.374647906055006	0.320947817401727	1	no	TECPR1	PREDICTED: tectonin beta-propeller repeat-containing protein 1-like isoform X3 [Sinocyclocheilus anshuiensis]	-	-	-	-
Unigene0000159	44	26.3333333333333	1.1229	1.7604	1.3117	0.3896	1.0086	0.9745	1.39833333333333	0.7909	-0.822141110416793	0.157885710165936	1	no	-	--	-	-	-	-
Unigene0000160	52.3333333333333	78.3333333333333	0.6224	0.7299	0.4689	0.9784	0.7881	0.7648	0.607066666666667	0.843766666666667	0.47498913581324	0.345047205866825	1	no	HS3ST5	PREDICTED: heparan sulfate glucosamine 3-O-sulfotransferase 5 [Cyprinus carpio]	ko00534//Glycosaminoglycan biosynthesis - heparan sulfate / heparin//Glycan biosynthesis and metabolism//Metabolism	-	-	-
Unigene0000161	2026.33333333333	1961.66666666667	11.6017	9.3538	11.0144	8.4651	8.6136	11.7983	10.6566333333333	9.62566666666667	-0.146793361461335	0.677610734191741	1	no	Rps6kb1	PREDICTED: ribosomal protein S6 kinase beta-1-like [Danio rerio]	ko04910//Insulin signaling pathway//Endocrine system//Organismal Systems;ko04012//ErbB signaling pathway//Signal transduction//Environmental Information Processing;ko04350//TGF-beta signaling pathway//Signal transduction//Environmental Information Processing;ko04150//mTOR signaling pathway//Signal transduction//Environmental Information Processing	-	GO:0032549//ribonucleoside binding;GO:0003824//catalytic activity;GO:0097159//organic cyclic compound binding;GO:1901363//heterocyclic compound binding;GO:0097367//carbohydrate derivative binding;GO:0001882//nucleoside binding;GO:0004672//protein kinase activity;GO:0036094//small molecule binding;GO:0032550//purine ribonucleoside binding;GO:0005488//binding;GO:0016773//phosphotransferase activity…	GO:0044260//cellular macromolecule metabolic process;GO:0043170//macromolecule metabolic process;GO:0036211//protein modification process;GO:0044237//cellular metabolic process;GO:0044763//single-organism cellular process;GO:0044699//single-organism process;GO:0019538//protein metabolic process;GO:0043412//macromolecule modification;GO:0006464//cellular protein modification process;GO:0044238//pr…
Unigene0000162	47.3333333333333	43	0.8117	1.7110	1.9491	1.8471	1.3323	0.6068	1.4906	1.26206666666667	-0.240105044365102	0.706861643213618	1	no	-	--	-	-	-	-
Unigene0000163	35.6666666666667	88.6666666666667	0.6024	1.0004	0.7268	4.4002	0.5984	0.1715	0.776533333333333	1.72336666666667	1.15010992474761	0.180766751364945	1	no	-	apolipoprotein M [Hemibarbus mylodon]	-	-	-	-
Unigene0000164	40.3333333333333	38	1.4587	1.2306	1.1258	1.4769	0.7407	1.0873	1.2717	1.10163333333333	-0.207114253767712	0.711989177842994	1	no	-	--	-	-	-	-
Unigene0000165	1.33333333333333	2.33333333333333	0.0645	0.0000	0.1992	0.1775	0.2144	0.0592	0.0879	0.150366666666667	0.774549714854796	0.668689817785843	1	no	-	--	-	-	-	-
Unigene0000166	63.6666666666667	63.6666666666667	1.1078	1.2333	1.4544	0.8407	1.4388	1.3142	1.26516666666667	1.1979	-0.0788199729923099	0.891766399445609	1	no	-	gag-like protein [Danio rerio]	-	-	-	-
Unigene0000167	0.666666666666667	51.6666666666667	0.0000	0.0737	0.0000	3.9507	0.5593	0.3706	0.0245666666666667	1.62686666666667	6.04925008787671	1.50609023003618e-06	0.0033059330882974	yes	Gpr87	PREDICTED: G-protein coupled receptor 87-like [Sinocyclocheilus rhinocerous]	ko04080//Neuroactive ligand-receptor interaction//Signaling molecules and interaction//Environmental Information Processing	-	-	-
Unigene0000168	11.3333333333333	13	0.7403	1.3504	0.1270	0.5657	0.6835	1.0754	0.739233333333333	0.774866666666667	0.0679182715532288	0.999999999999997	1	no	-	PREDICTED: metalloreductase STEAP2-like [Sinocyclocheilus rhinocerous]	-	-	-	-
Unigene0000169	12.6666666666667	15.6666666666667	0.9791	0.5000	1.0747	0.5387	0.9400	1.4970	0.851266666666667	0.9919	0.220583540866403	0.799317179080328	1	no	-	--	-	-	-	-
Unigene0000170	1163	1082.66666666667	15.6147	6.8627	14.1452	7.4635	8.4853	15.9367	12.2075333333333	10.6285	-0.199833713626046	0.652602660197193	1	no	BBS10	PREDICTED: Bardet-Biedl syndrome 10 protein-like isoform X1 [Sinocyclocheilus rhinocerous]	-	-	GO:0032549//ribonucleoside binding;GO:0001883//purine nucleoside binding;GO:0001882//nucleoside binding;GO:0032550//purine ribonucleoside binding;GO:1901363//heterocyclic compound binding;GO:0097159//organic cyclic compound binding;GO:0097367//carbohydrate derivative binding;GO:0005488//binding;GO:0036094//small molecule binding	GO:0071704//organic substance metabolic process;GO:0044238//primary metabolic process;GO:0019538//protein metabolic process;GO:0008152//metabolic process;GO:0043170//macromolecule metabolic process
Unigene0000171	40.3333333333333	49.6666666666667	0.9825	2.1505	1.8603	1.5495	3.1347	1.2258	1.66443333333333	1.97	0.243164543280103	0.689348491104516	1	no	-	--	-	-	-	-
Unigene0000172	5.66666666666667	5.66666666666667	0.1903	0.4165	0.5222	0.4653	0.1405	0.4074	0.376333333333333	0.337733333333333	-0.156126503947862	0.919067376738296	1	no	-	--	-	-	-	-
Unigene0000173	125.666666666667	211	2.1140	4.2763	1.1266	5.8155	3.6594	2.1126	2.50563333333333	3.8625	0.624359622461399	0.270858001219215	1	no	-	PREDICTED: E3 ubiquitin-protein ligase DTX3L-like [Sinocyclocheilus rhinocerous]	ko04330//Notch signaling pathway//Signal transduction//Environmental Information Processing	-	-	-
Unigene0000174	1867.66666666667	1547.33333333333	21.4523	16.1114	18.1427	10.6985	13.9894	18.6061	18.5688	14.4313333333333	-0.363675985968849	0.325421930656191	1	no	DNAJB1	PREDICTED: dnaJ homolog subfamily B member 1-like [Sinocyclocheilus grahami]	ko04141//Protein processing in endoplasmic reticulum//Folding, sorting and degradation//Genetic Information Processing	-	GO:0005488//binding;GO:0005515//protein binding	GO:0043170//macromolecule metabolic process;GO:0008152//metabolic process;GO:0044260//cellular macromolecule metabolic process;GO:0009987//cellular process;GO:0044238//primary metabolic process;GO:0019538//protein metabolic process;GO:0044237//cellular metabolic process;GO:0071704//organic substance metabolic process;GO:0044267//cellular protein metabolic process
Unigene0000175	1.33333333333333	3.66666666666667	0.1919	0.0700	0.0000	0.4693	0.1417	0.0587	0.0873	0.223233333333333	1.35449890836156	0.397534786468834	1	no	-	--	-	-	-	-
Unigene0000176	194	213.666666666667	1.4961	2.4372	1.3183	2.0814	1.9051	1.3962	1.75053333333333	1.79423333333333	0.03557298598984	0.941778773207837	1	no	GLB1L2	PREDICTED: beta-galactosidase-1-like protein 2 [Sinocyclocheilus rhinocerous]	-	-	GO:0003824//catalytic activity;GO:0004553//hydrolase activity, hydrolyzing O-glycosyl compounds;GO:0016798//hydrolase activity, acting on glycosyl bonds;GO:0016787//hydrolase activity;GO:0015925//galactosidase activity	GO:0044238//primary metabolic process;GO:0008152//metabolic process
Unigene0000177	3341	3981.33333333333	20.5585	23.3213	19.3011	26.2059	23.2516	20.8030	21.0603	23.4201666666667	0.15322535520457	0.647456949998605	1	no	snd1	staphylococcal nuclease domain-containing protein 1 isoform p100L [Danio rerio]	-	GO:1990904//ribonucleoprotein complex;GO:0030529//intracellular ribonucleoprotein complex;GO:0005622//intracellular;GO:0044464//cell part;GO:0032991//macromolecular complex;GO:0044424//intracellular part;GO:0005623//cell;GO:0031332//RNAi effector complex	GO:0016787//hydrolase activity;GO:0003824//catalytic activity;GO:0097159//organic cyclic compound binding;GO:0016788//hydrolase activity, acting on ester bonds;GO:0005488//binding	GO:0050789//regulation of biological process;GO:0044699//single-organism process;GO:0010468//regulation of gene expression;GO:0060255//regulation of macromolecule metabolic process;GO:0009987//cellular process;GO:0065007//biological regulation;GO:0019222//regulation of metabolic process;GO:0048519//negative regulation of biological process;GO:0009892//negative regulation of metabolic process;GO:0…
Unigene0000178	21	16	0.5849	0.6757	0.8694	0.4171	0.3240	0.7453	0.71	0.495466666666667	-0.519031023617909	0.41714755044691	1	no	-	--	-	-	-	-
Unigene0000179	171.666666666667	231.666666666667	1.4008	1.1064	1.0199	1.8116	1.2517	1.3639	1.1757	1.47573333333333	0.32791206956543	0.452222722404706	1	no	Parp12	PREDICTED: poly [ADP-ribose] polymerase 12-like [Sinocyclocheilus grahami]	-	-	GO:0005488//binding;GO:0043169//cation binding;GO:0043167//ion binding	-
Unigene0000180	5.33333333333333	8.66666666666667	0.1954	0.4277	0.2011	0.4479	0.0541	0.6722	0.274733333333333	0.3914	0.510611793067463	0.63604033861408	1	no	-	--	-	-	-	-
Unigene0000181	1870.33333333333	2346.66666666667	14.9693	5.3464	16.6329	8.4525	18.1555	17.9674	12.3162	14.8584666666667	0.270728043011186	0.558858477144968	1	no	QflA-14927	PREDICTED: coiled-coil domain-containing protein 191-like [Sinocyclocheilus rhinocerous]	-	-	-	-
Unigene0000182	38.3333333333333	39.6666666666667	0.9055	1.6804	2.1471	1.8410	1.1776	1.4808	1.57766666666667	1.4998	-0.0730222927978485	0.911036045836738	1	no	rpl24	PREDICTED: 60S ribosomal protein L24-like, partial [Panthera pardus]	ko03010//Ribosome//Translation//Genetic Information Processing	-	-	-
Unigene0000183	170.666666666667	148	2.0950	1.5555	1.9283	1.5349	1.5628	1.4584	1.8596	1.5187	-0.292155419165976	0.500950058291198	1	no	FSBP	PREDICTED: fibrinogen silencer-binding protein-like [Sinocyclocheilus rhinocerous]	ko03440//Homologous recombination//Replication and repair//Genetic Information Processing	-	-	-
Unigene0000184	43	425.666666666667	0.7028	2.6628	0.3616	27.3166	1.2279	3.3233	1.2424	10.6226	3.0959352851387	0.00150429443561515	0.303752740303327	no	-	PREDICTED: uncharacterized protein LOC109112478 [Cyprinus carpio]	-	-	-	-
Unigene0000185	21	51	0.3943	0.6360	0.3417	1.0848	1.3566	0.7045	0.457333333333333	1.04863333333333	1.19719233043898	0.0403618321359795	1	no	KCNN3	PREDICTED: small conductance calcium-activated potassium channel protein 3 isoform X1 [Danio rerio]	-	-	-	-
Unigene0000186	2592.33333333333	7890.66666666667	39.4103	54.4878	19.6615	185.9523	79.2838	50.7333	37.8532	105.323133333333	1.47633517515979	0.00318389229241259	0.457215742378609	no	anxa2-a	PREDICTED: annexin A2-like [Sinocyclocheilus grahami]	-	-	GO:0043168//anion binding;GO:0098772//molecular function regulator;GO:0008289//lipid binding;GO:0043167//ion binding;GO:0030234//enzyme regulator activity;GO:0004857//enzyme inhibitor activity;GO:0005543//phospholipid binding;GO:0055102//lipase inhibitor activity;GO:0005515//protein binding;GO:0005488//binding	-
Unigene0000187	12.3333333333333	14.3333333333333	1.1228	0.4779	0.7703	0.4576	1.1057	1.0873	0.790333333333333	0.883533333333333	0.160823307816272	0.873612227264245	1	no	-	--	-	-	-	-
Unigene0000188	27.3333333333333	34.3333333333333	0.5918	0.7449	1.1876	0.6241	0.8195	1.4931	0.841433333333333	0.9789	0.2183125166307	0.731276706399414	1	no	-	PREDICTED: sorbin and SH3 domain-containing protein 2-like [Sinocyclocheilus rhinocerous]	-	-	-	-
Unigene0000189	3.66666666666667	6.33333333333333	0.1219	0.1779	0.1673	0.3354	0.0901	0.2983	0.1557	0.241266666666667	0.631859662572347	0.483009812149039	1	no	-	--	-	-	-	-
Unigene0000190	930	1087.33333333333	13.6153	12.2917	14.9402	12.6531	15.3808	16.8273	13.6157333333333	14.9537333333333	0.135231024155593	0.711719973110241	1	no	rbm18	PREDICTED: probable RNA-binding protein 18 [Sinocyclocheilus rhinocerous]	-	-	GO:0005488//binding;GO:1901363//heterocyclic compound binding;GO:0003676//nucleic acid binding;GO:0036094//small molecule binding;GO:0097159//organic cyclic compound binding	-
Unigene0000191	17	12	1.1259	0.1297	1.8294	0.5977	0.9847	0.5437	1.02833333333333	0.7087	-0.537061034504158	0.534851965144631	1	no	-	--	-	-	-	-
Unigene0000192	14	18.6666666666667	0.7328	1.3854	0.8227	1.6494	1.4761	0.5501	0.9803	1.2252	0.321722043954349	0.659697598327217	1	no	-	--	-	-	-	-
Unigene0000193	38	91.6666666666667	0.5526	0.6426	0.8530	2.1535	1.4157	1.0298	0.682733333333333	1.533	1.16696360107121	0.0283638909931993	1	no	-	UDP glucuronosyltransferase 2 family polypeptide a1 isoform 3 [Danio rerio]	-	-	GO:0016757//transferase activity, transferring glycosyl groups;GO:0016740//transferase activity;GO:0003824//catalytic activity	-
Unigene0000194	328.666666666667	377.666666666667	3.5171	3.5828	2.1623	5.0857	2.5476	2.1759	3.0874	3.26973333333333	0.082780570978476	0.858762269735878	1	no	-	--	-	-	-	-
Unigene0000195	16.3333333333333	13.3333333333333	1.3099	1.5702	0.3209	0.6292	1.3130	0.5723	1.067	0.838166666666667	-0.348251123466796	0.66107686279927	1	no	-	--	-	-	-	-
Unigene0000196	356.666666666667	362.666666666667	3.4107	4.1296	2.8404	3.0849	3.7683	3.0694	3.46023333333333	3.30753333333333	-0.0651136300914402	0.87310387053556	1	no	Shpk	PREDICTED: sedoheptulokinase [Sinocyclocheilus rhinocerous]	-	-	GO:0003824//catalytic activity;GO:0016740//transferase activity;GO:0016772//transferase activity, transferring phosphorus-containing groups	-
Unigene0000197	357	439.333333333333	3.8174	8.7451	4.8826	9.9487	5.8044	3.9276	5.81503333333333	6.56023333333333	0.173959667665384	0.71779101849851	1	no	DDO	PREDICTED: D-aspartate oxidase-like [Sinocyclocheilus rhinocerous]	ko04146//Peroxisome//Transport and catabolism//Cellular Processes;ko00250//Alanine, aspartate and glutamate metabolism//Amino acid metabolism//Metabolism	-	GO:0003824//catalytic activity;GO:0016638//oxidoreductase activity, acting on the CH-NH2 group of donors;GO:0016491//oxidoreductase activity;GO:0016641//oxidoreductase activity, acting on the CH-NH2 group of donors, oxygen as acceptor;GO:0003884//D-amino-acid oxidase activity	GO:0008152//metabolic process;GO:0044699//single-organism process;GO:0044710//single-organism metabolic process
Unigene0000198	310.333333333333	774.666666666667	1.6890	1.7803	1.1850	7.3082	1.6904	1.5187	1.55143333333333	3.50576666666667	1.17612827370335	0.0377547878266768	1	no	THRAP3	PREDICTED: thyroid hormone receptor-associated protein 3-like isoform X2 [Sinocyclocheilus anshuiensis]	-	-	-	-
Unigene0000199	52	67	0.5742	0.9563	0.5138	0.9958	0.8989	0.5611	0.681433333333333	0.8186	0.264586146029328	0.620741947988384	1	no	XKR7	XK-related protein 7 [Danio rerio]	-	GO:0044425//membrane part;GO:0031224//intrinsic component of membrane;GO:0016020//membrane	-	-
Unigene0000200	81.6666666666667	73.3333333333333	0.5842	1.6958	1.0064	1.0249	1.1538	0.5826	1.09546666666667	0.920433333333333	-0.251160449476492	0.654513230595525	1	no	LYPD6B	PREDICTED: ly6/PLAUR domain-containing protein 6B-like isoform X1 [Sinocyclocheilus anshuiensis]	-	-	-	-
Unigene0000201	5.33333333333333	9.66666666666667	0.2787	0.1830	0.4589	1.0733	0.3705	0.1023	0.306866666666667	0.515366666666667	0.747987286490259	0.420641601437478	1	no	Ttc22	PREDICTED: LOW QUALITY PROTEIN: tetratricopeptide repeat protein 22-like [Cyprinus carpio]	-	-	-	-
Unigene0000202	13	19.6666666666667	0.6272	0.8924	1.0328	1.1503	0.7644	1.6113	0.8508	1.17533333333333	0.466178035525711	0.470810926432803	1	no	-	--	-	-	-	-
Unigene0000203	16.6666666666667	13	1.0377	0.9086	0.7475	0.5709	0.8047	0.6188	0.897933333333333	0.6648	-0.433687954573406	0.52314864122366	1	no	-	--	-	-	-	-
Unigene0000204	21	18.6666666666667	1.1075	0.7183	0.8442	0.7522	1.3632	0.2258	0.89	0.7804	-0.189591558132096	0.780813964944996	1	no	-	--	-	-	-	-
Unigene0000205	3.66666666666667	10.6666666666667	0.0944	0.1550	0.2915	0.6926	0.3138	0.4331	0.1803	0.479833333333333	1.4121339862973	0.0943617796909477	1	no	-	PREDICTED: histone-lysine N-methyltransferase 2C-like isoform X19 [Salmo salar]	-	-	-	-
Unigene0000206	1066.33333333333	1541.66666666667	9.6520	15.1696	7.5785	21.6576	10.7679	10.3692	10.8000333333333	14.2649	0.40143386820994	0.350470777898598	1	no	optn	PREDICTED: optineurin [Sinocyclocheilus rhinocerous]	-	GO:0005623//cell;GO:0044464//cell part;GO:0005622//intracellular;GO:0044424//intracellular part	-	-
Unigene0000207	44.6666666666667	61.3333333333333	1.2093	3.3317	1.3732	2.8296	1.5245	2.9458	1.9714	2.4333	0.303693669132461	0.610725785346652	1	no	sand	PREDICTED: vacuolar fusion protein MON1 homolog B-like [Sinocyclocheilus anshuiensis]	-	-	-	-
Unigene0000208	9	11.6666666666667	0.4219	0.2886	0.7598	0.3869	0.2921	1.0644	0.4901	0.581133333333333	0.245793062097191	0.805338531047709	1	no	PCLO	PREDICTED: protein piccolo isoform X3 [Danio rerio]	-	-	-	-
Unigene0000209	7.33333333333333	10	0.5588	0.5504	0.1725	0.6661	0.4333	0.5126	0.427233333333333	0.537333333333333	0.330793125560389	0.705499596593162	1	no	-	--	-	-	-	-
Unigene0000210	766.333333333333	2314.66666666667	13.0262	23.6285	12.1578	70.3719	35.9772	28.4590	16.2708333333333	44.9360333333333	1.46558463568034	0.0010756860246223	0.249720682450896	no	IRF1	interferon regulatory factor 1 [Carassius auratus]	-	-	GO:0097159//organic cyclic compound binding;GO:1901363//heterocyclic compound binding;GO:0005488//binding;GO:0003676//nucleic acid binding	-
Unigene0000211	14.6666666666667	15.6666666666667	0.4623	0.7227	1.8348	1.0294	0.2195	1.6357	1.0066	0.961533333333333	-0.0660817257078902	0.967086161568048	1	no	-	--	-	-	-	-
Unigene0000212	5.33333333333333	5.33333333333333	0.3916	0.0000	0.6717	0.4190	0.2169	0.3593	0.354433333333333	0.331733333333333	-0.0954903064290851	0.999999999999997	1	no	-	--	-	-	-	-
Unigene0000213	11.6666666666667	11.6666666666667	0.3916	1.0001	1.0075	1.1372	0.5785	0.4790	0.799733333333333	0.731566666666667	-0.128529680311209	0.906175146199949	1	no	-	--	-	-	-	-
Unigene0000214	6	8	0.4655	0.0637	0.5389	0.4802	0.3223	0.5338	0.356033333333333	0.445433333333333	0.323197205405053	0.734514934285395	1	no	-	--	-	-	-	-
Unigene0000215	12	15.3333333333333	0.6584	0.9368	0.8808	0.9660	1.8965	0.2416	0.825333333333333	1.0347	0.326163720801539	0.679222880405167	1	no	-	PREDICTED: low-density lipoprotein receptor class A domain-containing protein 4-like [Sinocyclocheilus grahami]	-	-	-	-
Unigene0000216	31	51.6666666666667	0.5799	0.5923	0.6962	1.1521	0.6424	1.0640	0.6228	0.952833333333333	0.613454940020922	0.257984438395281	1	no	ERBB4	PREDICTED: receptor tyrosine-protein kinase erbB-4-like [Sinocyclocheilus grahami]	ko04020//Calcium signaling pathway//Signal transduction//Environmental Information Processing;ko04144//Endocytosis//Transport and catabolism//Cellular Processes;ko04012//ErbB signaling pathway//Signal transduction//Environmental Information Processing	-	GO:0016740//transferase activity;GO:0003824//catalytic activity;GO:0016772//transferase activity, transferring phosphorus-containing groups;GO:0004672//protein kinase activity;GO:0016773//phosphotransferase activity, alcohol group as acceptor;GO:1901363//heterocyclic compound binding;GO:0005488//binding;GO:0036094//small molecule binding;GO:0097159//organic cyclic compound binding;GO:0004713//pro…	GO:0006796//phosphate-containing compound metabolic process;GO:0006793//phosphorus metabolic process;GO:0044237//cellular metabolic process;GO:0008152//metabolic process;GO:0009987//cellular process
Unigene0000217	113.666666666667	111	0.5404	2.4098	0.6900	0.9544	1.7740	0.6335	1.2134	1.12063333333333	-0.114740905078412	0.857646831254362	1	no	-	PREDICTED: nesprin-1-like [Sinocyclocheilus rhinocerous]	-	-	-	-
Unigene0000218	9.66666666666667	14	0.0996	0.6543	0.2734	0.3350	0.8095	0.2742	0.342433333333333	0.4729	0.465711997609151	0.616845894068799	1	no	EPS15	PREDICTED: extracellular matrix-binding protein ebh-like, partial [Sinocyclocheilus anshuiensis]	-	-	-	-
Unigene0000219	195.666666666667	172.666666666667	2.1648	7.2705	3.7565	2.5300	6.6776	2.0250	4.39726666666667	3.7442	-0.231949525710972	0.693274669660474	1	no	-	PREDICTED: extracellular matrix-binding protein ebh-like, partial [Sinocyclocheilus anshuiensis]	-	-	-	-
Unigene0000220	809.333333333333	746	2.8499	6.4225	2.7208	3.2440	5.1221	2.1208	3.99773333333333	3.49563333333333	-0.193628376595858	0.679484413089725	1	no	SORCS3	PREDICTED: VPS10 domain-containing receptor SorCS3-like [Sinocyclocheilus grahami]	-	-	-	-
Unigene0000221	40.6666666666667	42	0.7658	0.5528	0.7378	0.5976	0.9387	0.5082	0.685466666666667	0.6815	-0.00837285433659961	1	1	no	-	--	-	-	-	-
Unigene0000222	2974.66666666667	3472	10.1430	11.7137	9.7012	11.6463	12.0976	10.7464	10.5193	11.4967666666667	0.128189472216691	0.701131918224871	1	no	CCNT2	PREDICTED: cyclin-T2-like isoform X1 [Sinocyclocheilus rhinocerous]	-	-	-	GO:0010467//gene expression;GO:0051726//regulation of cell cycle;GO:0009058//biosynthetic process;GO:0090304//nucleic acid metabolic process;GO:0034645//cellular macromolecule biosynthetic process;GO:0044271//cellular nitrogen compound biosynthetic process;GO:0050789//regulation of biological process;GO:0019438//aromatic compound biosynthetic process;GO:0044260//cellular macromolecule metabolic p…
Unigene0000223	73.6666666666667	76	1.1892	1.3861	0.9854	1.9544	0.4449	0.9068	1.1869	1.10203333333333	-0.107030526638305	0.865110319399803	1	no	-	--	-	-	-	-
Unigene0000224	2	34.3333333333333	0.3302	0.0723	0.0000	4.9048	0.5853	0.8482	0.134166666666667	2.11276666666667	3.97703525763292	0.000293020759189731	0.111475222120437	no	-	--	-	-	-	-
Unigene0000225	1.33333333333333	7.33333333333333	0.1321	0.0723	0.0680	0.0606	0.2926	1.0299	0.0908	0.461033333333333	2.34410686059883	0.0663878869997268	1	no	-	--	-	-	-	-
Unigene0000226	18.3333333333333	26	0.3718	1.9181	0.8198	0.7792	3.2360	0.3411	1.03656666666667	1.4521	0.486327902877086	0.580490098223039	1	no	BTBD11	PREDICTED: ankyrin repeat and BTB/POZ domain-containing protein 2-like [Sinocyclocheilus rhinocerous]	-	-	-	-
Unigene0000227	6.66666666666667	12.6666666666667	0.3283	0.2874	0.7431	0.9030	0.8000	0.7228	0.452933333333333	0.8086	0.836127486113651	0.281805570465291	1	no	-	PREDICTED: receptor tyrosine-protein kinase erbB-4-like, partial [Notothenia coriiceps]	ko03013//RNA transport//Translation//Genetic Information Processing	-	-	-
Unigene0000228	1585.66666666667	1793.33333333333	9.5454	6.3895	12.1329	10.1829	6.4740	12.6457	9.35593333333333	9.76753333333333	0.0621126921994681	0.877047025848682	1	no	TINF2	PREDICTED: TERF1-interacting nuclear factor 2-like [Cyprinus carpio]	-	-	-	-
Unigene0000229	57	58	1.7438	1.4107	3.5500	1.7729	3.3178	1.5303	2.23483333333333	2.207	-0.0180806142567371	0.988339435932756	1	no	-	--	-	-	-	-
Unigene0000230	0.666666666666667	0.666666666666667	0.1759	0.0000	0.0000	0.0807	0.0974	0.0000	0.0586333333333333	0.0593666666666667	0.0179320336296595	1	1	no	-	--	-	-	-	-
Unigene0000231	16	22	0.7842	1.0422	0.9799	1.3868	1.0550	1.1306	0.935433333333333	1.1908	0.348224382750818	0.597950947187146	1	no	-	--	-	-	-	-
Unigene0000232	8.66666666666667	23	0.3753	0.3594	0.5310	1.8928	0.8316	0.3874	0.4219	1.03726666666667	1.29781384576326	0.0863407642046522	1	no	-	--	-	-	-	-
Unigene0000233	3346	3541	22.2832	18.4918	18.8848	16.7386	19.8356	22.6831	19.8866	19.7524333333333	-0.00976624844478235	0.977308731208594	1	no	FBXW5	PREDICTED: F-box/WD repeat-containing protein 5-like [Sinocyclocheilus grahami]	-	GO:0000151//ubiquitin ligase complex;GO:1902494//catalytic complex;GO:1990234//transferase complex;GO:0043234//protein complex;GO:0005623//cell;GO:0005622//intracellular;GO:0031461//cullin-RING ubiquitin ligase complex;GO:0044424//intracellular part;GO:0032991//macromolecular complex;GO:0044464//cell part	-	GO:0009057//macromolecule catabolic process;GO:0006511//ubiquitin-dependent protein catabolic process;GO:0016043//cellular component organization;GO:0044257//cellular protein catabolic process;GO:0043170//macromolecule metabolic process;GO:0044267//cellular protein metabolic process;GO:0044260//cellular macromolecule metabolic process;GO:0006508//proteolysis;GO:0007098//centrosome cycle;GO:002240…
Unigene0000234	580.333333333333	846.333333333333	1.5091	1.9324	2.0374	2.8616	2.4676	2.1237	1.8263	2.4843	0.443915630243493	0.241260479590154	1	no	nav3	PREDICTED: LOW QUALITY PROTEIN: neuron navigator 3 [Sinocyclocheilus grahami]	-	-	-	-
Unigene0000235	3.66666666666667	8	0.5492	0.0751	0.1413	1.3850	0.0000	0.1260	0.2552	0.503666666666667	0.980840925566167	0.477393800918888	1	no	-	PREDICTED: vegetative cell wall protein gp1-like [Sinocyclocheilus rhinocerous]	-	-	-	-
Unigene0000236	10.3333333333333	8	0.5004	0.3834	0.7209	0.4130	0.2772	0.4591	0.5349	0.3831	-0.481548177922271	0.545345820291451	1	no	-	--	-	-	-	-
Unigene0000237	24.3333333333333	34.6666666666667	0.3969	1.3032	0.3540	0.9220	1.2312	0.5826	0.6847	0.911933333333333	0.413456347941434	0.551631876483693	1	no	-	--	-	-	-	-
Unigene0000238	119.666666666667	217	1.0278	4.5609	1.5577	6.1346	3.4988	2.1259	2.38213333333333	3.91976666666667	0.718513610747903	0.233809165369336	1	no	-	--	-	-	-	-
Unigene0000239	28	50.3333333333333	0.6841	0.9671	0.8506	2.1694	0.9473	0.9937	0.833933333333333	1.37013333333333	0.716312333801719	0.216564417125909	1	no	Hfe2	PREDICTED: hemojuvelin-like [Sinocyclocheilus rhinocerous]	-	-	-	GO:0044707//single-multicellular organism process;GO:0032502//developmental process;GO:0048856//anatomical structure development;GO:0007275//multicellular organism development;GO:0009790//embryo development;GO:0048568//embryonic organ development;GO:0044699//single-organism process;GO:0048731//system development;GO:0032501//multicellular organismal process;GO:0048513//animal organ development;GO:…
Unigene0000240	281	770	1.6035	2.8634	2.3133	8.5901	4.4964	3.9417	2.26006666666667	5.67606666666667	1.32852620488379	0.00306061934845914	0.445678925284743	no	PAPSS2	PREDICTED: bifunctional 3'-phosphoadenosine 5'-phosphosulfate synthase 2-like [Sinocyclocheilus grahami]	ko01100//Metabolic pathways//Global and Overview//Metabolism;ko01130//Biosynthesis of antibiotics//Global and Overview//Metabolism;ko00230//Purine metabolism//Nucleotide metabolism//Metabolism;ko01120//Microbial metabolism in diverse environments//Global and Overview//Metabolism;ko00450//Selenocompound metabolism//Metabolism of other amino acids//Metabolism;ko00920//Sulfur metabolism//Energy meta…	-	GO:0001883//purine nucleoside binding;GO:0016740//transferase activity;GO:0032550//purine ribonucleoside binding;GO:0032549//ribonucleoside binding;GO:0016301//kinase activity;GO:0004779//sulfate adenylyltransferase activity;GO:0016779//nucleotidyltransferase activity;GO:0097367//carbohydrate derivative binding;GO:0097159//organic cyclic compound binding;GO:0036094//small molecule binding;GO:0005…	GO:0008152//metabolic process;GO:0044237//cellular metabolic process;GO:0009987//cellular process;GO:0006790//sulfur compound metabolic process
Unigene0000241	40.3333333333333	43.3333333333333	0.5382	0.4935	0.7934	0.5469	0.5640	0.7207	0.608366666666667	0.610533333333333	0.00512895651410195	1	1	no	CHRNA9	PREDICTED: neuronal acetylcholine receptor subunit alpha-9-II-like [Sinocyclocheilus anshuiensis]	ko04080//Neuroactive ligand-receptor interaction//Signaling molecules and interaction//Environmental Information Processing	GO:0097060//synaptic membrane;GO:0016020//membrane;GO:0005886//plasma membrane;GO:0045202//synapse;GO:0031224//intrinsic component of membrane;GO:0098805//whole membrane;GO:0098590//plasma membrane region;GO:0044456//synapse part;GO:0044464//cell part;GO:0071944//cell periphery;GO:0044459//plasma membrane part;GO:0005623//cell;GO:0098589//membrane region;GO:0044425//membrane part	GO:0005216//ion channel activity;GO:0022836//gated channel activity;GO:0022857//transmembrane transporter activity;GO:0022892//substrate-specific transporter activity;GO:0015276//ligand-gated ion channel activity;GO:0060089//molecular transducer activity;GO:0004872//receptor activity;GO:0022838//substrate-specific channel activity;GO:0022834//ligand-gated channel activity;GO:0099600//transmembran…	GO:0044763//single-organism cellular process;GO:0048562//embryonic organ morphogenesis;GO:0030003//cellular cation homeostasis;GO:0072503//cellular divalent inorganic cation homeostasis;GO:0007275//multicellular organism development;GO:0009790//embryo development;GO:0044699//single-organism process;GO:0055080//cation homeostasis;GO:0048513//animal organ development;GO:0098771//inorganic ion homeo…
Unigene0000242	122	212	1.0062	2.1909	0.8938	3.1760	1.9479	1.3896	1.36363333333333	2.17116666666667	0.671014705754839	0.19747426532969	1	no	Jakmip3	PREDICTED: janus kinase and microtubule-interacting protein 3 isoform X2 [Sinocyclocheilus grahami]	-	-	-	-
Unigene0000243	54	59.6666666666667	0.8360	1.2459	0.9335	1.0765	1.0838	0.9465	1.00513333333333	1.0356	0.0430799793148619	0.945481870506751	1	no	Gucy2e	PREDICTED: retinal guanylyl cyclase 2-like [Sinocyclocheilus grahami]	-	GO:0031224//intrinsic component of membrane;GO:0016020//membrane;GO:0044425//membrane part	GO:1901363//heterocyclic compound binding;GO:0016740//transferase activity;GO:0009975//cyclase activity;GO:0005488//binding;GO:0036094//small molecule binding;GO:0016829//lyase activity;GO:0097159//organic cyclic compound binding;GO:0003824//catalytic activity;GO:0016301//kinase activity;GO:0032550//purine ribonucleoside binding;GO:0032549//ribonucleoside binding;GO:0001883//purine nucleoside bin…	GO:0044763//single-organism cellular process;GO:1901360//organic cyclic compound metabolic process;GO:0034641//cellular nitrogen compound metabolic process;GO:0006793//phosphorus metabolic process;GO:0051716//cellular response to stimulus;GO:0009987//cellular process;GO:0009058//biosynthetic process;GO:0007154//cell communication;GO:0044711//single-organism biosynthetic process;GO:0046483//hetero…
Unigene0000244	9.66666666666667	16	0.2275	0.5394	0.3901	0.4171	0.9240	0.4869	0.385666666666667	0.609333333333333	0.659877205950578	0.350166978890143	1	no	-	PREDICTED: fibroleukin-like [Cyprinus carpio]	-	-	-	-
Unigene0000245	13.3333333333333	9.66666666666667	1.0650	0.3330	0.6785	0.8371	0.2247	0.3257	0.692166666666667	0.4625	-0.581666100299965	0.463044487570284	1	no	-	--	-	-	-	-
Unigene0000246	37.6666666666667	33.3333333333333	2.7915	2.9873	1.5321	2.6735	1.6494	1.6504	2.43696666666667	1.9911	-0.291520837650981	0.626981554784843	1	no	-	--	-	-	-	-
Unigene0000247	9	19	0.5939	0.4333	0.3565	0.3631	0.7676	1.5891	0.461233333333333	0.9066	0.974969380894821	0.195798732988614	1	no	-	--	-	-	-	-
Unigene0000248	892.666666666667	1050.33333333333	10.9205	11.5748	11.8080	9.4606	12.9440	15.4065	11.4344333333333	12.6037	0.140462449514741	0.708146267296922	1	no	RGP1	PREDICTED: RAB6A-GEF complex partner protein 2-like isoform X1 [Cyprinus carpio]	-	-	-	-
Unigene0000249	10.6666666666667	16.6666666666667	0.6086	0.3997	1.0021	0.9487	1.2136	0.8375	0.670133333333333	0.999933333333333	0.577383741514426	0.414401388095333	1	no	Gripap1	PREDICTED: GRIP1-associated protein 1 [Astyanax mexicanus]	-	-	-	-
Unigene0000250	375.666666666667	139	11.1428	11.0614	2.6545	1.7256	5.7624	1.5906	8.28623333333333	3.0262	-1.45320910828517	0.0212573906631593	0.937272923396327	no	Cldn4	PREDICTED: claudin-4-like [Sinocyclocheilus anshuiensis]	ko04530//Tight junction//Cellular commiunity//Cellular Processes;ko04514//Cell adhesion molecules (CAMs)//Signaling molecules and interaction//Environmental Information Processing	GO:0031224//intrinsic component of membrane;GO:0005911//cell-cell junction;GO:0016020//membrane;GO:0030054//cell junction;GO:0043296//apical junction complex;GO:0044425//membrane part	-	GO:0044767//single-organism developmental process;GO:0044707//single-multicellular organism process;GO:0048731//system development;GO:0007275//multicellular organism development;GO:0044699//single-organism process;GO:0032502//developmental process;GO:0048856//anatomical structure development;GO:0048513//animal organ development;GO:0032501//multicellular organismal process;GO:0007423//sensory orga…
Unigene0000251	6.66666666666667	10.6666666666667	0.6179	0.3757	0.4239	0.5036	0.5324	1.0707	0.4725	0.702233333333333	0.571636149786301	0.487270245583484	1	no	-	--	-	-	-	-
Unigene0000252	14	16.3333333333333	0.6856	1.3275	0.3256	0.8221	0.8179	0.8709	0.779566666666667	0.836966666666667	0.102497762622554	0.924934125274549	1	no	-	PREDICTED: uncharacterized protein LOC101477648 [Maylandia zebra]	-	-	-	-
Unigene0000253	12	12.6666666666667	0.5887	0.6443	0.6058	0.2699	0.9783	0.6301	0.612933333333333	0.6261	0.0306629357853444	0.999999999999994	1	no	-	--	-	-	-	-
Unigene0000254	1772.33333333333	1692	40.2070	36.7088	27.7329	33.6560	35.4166	25.1936	34.8829	31.4220666666667	-0.150741912450959	0.676436321006373	1	no	cript	PREDICTED: cysteine-rich PDZ-binding protein [Sinocyclocheilus grahami]	-	GO:0005622//intracellular;GO:0044464//cell part;GO:0044424//intracellular part;GO:0005623//cell	-	-
Unigene0000255	55.3333333333333	109	1.3283	3.0807	1.1391	2.9581	4.4848	2.8145	1.84936666666667	3.41913333333333	0.88659939296381	0.103979693982845	1	no	-	--	-	-	-	-
Unigene0000256	10.6666666666667	22.3333333333333	0.5753	0.4497	0.3383	0.9797	0.9105	0.7917	0.454433333333333	0.893966666666667	0.976152376180868	0.12333436875372	1	no	-	--	-	-	-	-
Unigene0000257	5.66666666666667	6.66666666666667	0.3905	0.4274	0.3349	0.6565	0.5047	0.1194	0.384266666666667	0.426866666666667	0.151677674450697	0.999999999999999	1	no	-	--	-	-	-	-
Unigene0000258	29	30.3333333333333	1.0366	1.2291	0.3556	0.3433	1.7865	0.5812	0.873766666666667	0.903666666666667	0.0485426378975057	0.964658648593348	1	no	Adm2	PREDICTED: ADM2-like [Sinocyclocheilus rhinocerous]	-	-	-	-
Unigene0000259	9	12.6666666666667	0.7281	0.0000	0.6957	0.5246	0.8066	0.6202	0.4746	0.650466666666667	0.454763027023258	0.637889953404801	1	no	-	--	-	-	-	-
Unigene0000260	1773.66666666667	1735	15.1434	14.1138	16.0646	12.5847	14.5864	14.5025	15.1072666666667	13.8912	-0.121071426815926	0.725448991851143	1	no	slc30a5	PREDICTED: zinc transporter 5-like [Sinocyclocheilus rhinocerous]	-	GO:0044425//membrane part;GO:0031224//intrinsic component of membrane;GO:0043226//organelle;GO:0043229//intracellular organelle;GO:0005623//cell;GO:0044424//intracellular part;GO:0044464//cell part;GO:0043227//membrane-bounded organelle;GO:0016020//membrane;GO:0005622//intracellular;GO:0043231//intracellular membrane-bounded organelle	GO:0022890//inorganic cation transmembrane transporter activity;GO:0046915//transition metal ion transmembrane transporter activity;GO:0015075//ion transmembrane transporter activity;GO:0022857//transmembrane transporter activity;GO:0022892//substrate-specific transporter activity;GO:0046873//metal ion transmembrane transporter activity;GO:0022891//substrate-specific transmembrane transporter act…	GO:0006811//ion transport;GO:0044699//single-organism process;GO:0006829//zinc II ion transport;GO:0070838//divalent metal ion transport;GO:0006810//transport;GO:0030001//metal ion transport;GO:0051179//localization;GO:0006812//cation transport;GO:0044763//single-organism cellular process;GO:0009987//cellular process;GO:0072511//divalent inorganic cation transport;GO:1902578//single-organism loca…
Unigene0000261	3.66666666666667	67.3333333333333	0.1241	0.2716	0.3192	0.0000	1.3745	10.3578	0.2383	3.91076666666667	4.03660060454253	0.00158526902068563	0.309865486426267	no	fxyd2	PREDICTED: sodium/potassium-transporting ATPase subunit gamma-like [Sinocyclocheilus anshuiensis]	-	-	-	-
Unigene0000262	134.333333333333	224.666666666667	1.2392	0.9329	1.1209	1.9107	1.5040	1.7234	1.09766666666667	1.7127	0.641832456954776	0.138083442641344	1	no	Unc13b	PREDICTED: protein unc-13 homolog B-like isoform X2 [Cyprinus carpio]	-	-	-	-
Unigene0000263	103	113	4.9183	5.9106	4.7139	5.3058	4.6475	5.8393	5.18093333333333	5.2642	0.0230022821246792	0.968542556173348	1	no	-	--	-	-	-	-
Unigene0000264	51.6666666666667	61.3333333333333	0.8504	1.2992	0.7293	0.7148	1.2365	1.2516	0.959633333333333	1.06763333333333	0.153861078362708	0.78286451684352	1	no	CYP21A2	PREDICTED: steroid 21-hydroxylase-like [Sinocyclocheilus anshuiensis]	ko01100//Metabolic pathways//Global and Overview//Metabolism;ko00140//Steroid hormone biosynthesis//Lipid metabolism//Metabolism	-	GO:0046914//transition metal ion binding;GO:1901363//heterocyclic compound binding;GO:0043169//cation binding;GO:0097159//organic cyclic compound binding;GO:0003824//catalytic activity;GO:0016491//oxidoreductase activity;GO:0046906//tetrapyrrole binding;GO:0046872//metal ion binding;GO:0043167//ion binding;GO:0005488//binding	GO:0044710//single-organism metabolic process;GO:0044699//single-organism process;GO:0008152//metabolic process
Unigene0000265	48.3333333333333	60	0.6167	1.2410	1.1668	0.8208	1.4104	1.2957	1.00816666666667	1.17563333333333	0.221704010186272	0.689573736962978	1	no	adprhl1	PREDICTED: protein ADP-ribosylarginine hydrolase-like protein 1 [Sinocyclocheilus anshuiensis]	-	-	GO:0005488//binding;GO:0043169//cation binding;GO:0043167//ion binding;GO:0046872//metal ion binding;GO:0016799//hydrolase activity, hydrolyzing N-glycosyl compounds;GO:0003824//catalytic activity;GO:0016798//hydrolase activity, acting on glycosyl bonds;GO:0016787//hydrolase activity	GO:0006464//cellular protein modification process;GO:0044260//cellular macromolecule metabolic process;GO:0044237//cellular metabolic process;GO:0009987//cellular process;GO:0043412//macromolecule modification;GO:0019538//protein metabolic process;GO:0071704//organic substance metabolic process;GO:0044238//primary metabolic process;GO:0036211//protein modification process;GO:0008152//metabolic pr…
Unigene0000266	9.66666666666667	11	0.4070	0.6681	0.9772	0.8085	0.1503	1.1201	0.6841	0.692966666666667	0.0185787269705168	1	1	no	-	--	-	-	-	-
Unigene0000267	69.6666666666667	86.6666666666667	2.3071	2.7028	2.0732	4.6482	1.8719	1.5502	2.36103333333333	2.6901	0.188241393730272	0.731513302819531	1	no	-	--	-	-	-	-
Unigene0000268	9.33333333333333	12	0.8889	0.2594	0.5488	0.9781	0.8534	0.2718	0.5657	0.7011	0.309583063860207	0.717441425953895	1	no	-	--	-	-	-	-
Unigene0000269	25	34.6666666666667	0.8497	1.4531	1.8582	1.8506	1.0002	2.3874	1.387	1.74606666666667	0.332140855975513	0.600313582486155	1	no	-	--	-	-	-	-
Unigene0000270	327.333333333333	260	2.4412	1.8526	1.5642	1.2460	1.2375	1.8488	1.95266666666667	1.4441	-0.435275044101487	0.305953018915819	1	no	Kirrel	PREDICTED: kin of IRRE-like protein 1 isoform X1 [Sinocyclocheilus rhinocerous]	-	-	-	GO:0044707//single-multicellular organism process;GO:0072010//glomerular epithelium development;GO:0072001//renal system development;GO:0016043//cellular component organization;GO:0048731//system development;GO:0044767//single-organism developmental process;GO:0048513//animal organ development;GO:0032501//multicellular organismal process;GO:0072073//kidney epithelium development;GO:0044763//singl…
Unigene0000271	1217	802.333333333333	16.2034	4.6780	24.2908	11.6474	8.0392	8.3521	15.0574	9.34623333333333	-0.688015717290716	0.175667945104152	1	no	Pim1	PREDICTED: serine/threonine-protein kinase pim-2-like [Sinocyclocheilus rhinocerous]	-	-	-	-
Unigene0000272	1978.33333333333	2114.33333333333	24.6069	32.9911	19.1408	21.0339	30.8618	25.3188	25.5796	25.7381666666667	0.00891558953364015	0.981279963720535	1	no	UMPS	PREDICTED: uridine 5'-monophosphate synthase [Sinocyclocheilus rhinocerous]	ko01100//Metabolic pathways//Global and Overview//Metabolism;ko00240//Pyrimidine metabolism//Nucleotide metabolism//Metabolism;ko00983//Drug metabolism - other enzymes//Xenobiotics biodegradation and metabolism//Metabolism	-	GO:0016757//transferase activity, transferring glycosyl groups;GO:0016830//carbon-carbon lyase activity;GO:0016740//transferase activity;GO:0016831//carboxy-lyase activity;GO:0016763//transferase activity, transferring pentosyl groups;GO:0003824//catalytic activity;GO:0016829//lyase activity	GO:0019637//organophosphate metabolic process;GO:0006220//pyrimidine nucleotide metabolic process;GO:0019438//aromatic compound biosynthetic process;GO:0044281//small molecule metabolic process;GO:0044763//single-organism cellular process;GO:0042455//ribonucleoside biosynthetic process;GO:0008152//metabolic process;GO:0046390//ribose phosphate biosynthetic process;GO:0006221//pyrimidine nucleotid…
Unigene0000273	22.3333333333333	13	1.5256	1.0018	1.6955	1.2311	0.4732	0.5599	1.40763333333333	0.754733333333333	-0.89923268483555	0.179320248156033	1	no	-	--	-	-	-	-
Unigene0000274	12.3333333333333	21.6666666666667	0.1904	0.7739	0.1119	0.6484	0.4519	0.5988	0.358733333333333	0.566366666666667	0.658824552481754	0.389715825088207	1	no	UCN3	PREDICTED: urocortin-3-like [Sinocyclocheilus rhinocerous]	ko04080//Neuroactive ligand-receptor interaction//Signaling molecules and interaction//Environmental Information Processing	GO:0044421//extracellular region part;GO:0005576//extracellular region	-	GO:0032501//multicellular organismal process;GO:0044699//single-organism process;GO:0050896//response to stimulus;GO:0044707//single-multicellular organism process
Unigene0000275	956.666666666667	799.333333333333	8.4183	2.9119	9.0622	3.5770	4.0222	8.3334	6.79746666666667	5.31086666666667	-0.356049861664383	0.469475260085075	1	no	DNAJB5	PREDICTED: dnaJ homolog subfamily B member 5-like isoform X1 [Sinocyclocheilus rhinocerous]	-	-	GO:0005488//binding;GO:0005515//protein binding	-
Unigene0000276	44.6666666666667	13.6666666666667	1.6053	1.2997	0.1584	0.3630	0.2923	0.2219	1.02113333333333	0.2924	-1.80415604039028	0.0198051573475987	0.917983834605084	no	-	PREDICTED: uncharacterized protein LOC109202850 [Oreochromis niloticus]	-	-	-	-
Unigene0000277	8	20.3333333333333	0.0000	0.8307	0.4687	1.0672	0.2803	1.5320	0.433133333333333	0.959833333333333	1.14797271173706	0.219416325083108	1	no	-	--	-	-	-	-
Unigene0000278	49.6666666666667	57.3333333333333	0.0901	1.9519	0.8342	1.0077	1.4369	0.6446	0.958733333333333	1.02973333333333	0.103069277703926	0.899742760851472	1	no	-	--	-	-	-	-
Unigene0000279	781.333333333333	905	12.7114	10.7659	12.9113	12.5347	11.9592	14.8485	12.1295333333333	13.1141333333333	0.112598422271313	0.760169669555218	1	no	Mrgbp	PREDICTED: MRG/MORF4L-binding protein isoform X1 [Danio rerio]	-	GO:0031248//protein acetyltransferase complex;GO:0044424//intracellular part;GO:0005623//cell;GO:0043231//intracellular membrane-bounded organelle;GO:1990234//transferase complex;GO:0044428//nuclear part;GO:0070013//intracellular organelle lumen;GO:0005622//intracellular;GO:0005634//nucleus;GO:1902493//acetyltransferase complex;GO:0005654//nucleoplasm;GO:0031974//membrane-enclosed lumen;GO:004322…	-	GO:0032774//RNA biosynthetic process;GO:0009058//biosynthetic process;GO:0034645//cellular macromolecule biosynthetic process;GO:0044260//cellular macromolecule metabolic process;GO:0046483//heterocycle metabolic process;GO:0008152//metabolic process;GO:0006351//transcription, DNA-templated;GO:0016070//RNA metabolic process;GO:0018130//heterocycle biosynthetic process;GO:0034641//cellular nitroge…
Unigene0000280	10.6666666666667	83	0.1358	0.1486	0.2794	3.2210	0.3572	0.3581	0.187933333333333	1.3121	2.80358479497805	0.00123889848819081	0.272794184386088	no	F2RL2	PREDICTED: proteinase-activated receptor 3 [Danio rerio]	ko04080//Neuroactive ligand-receptor interaction//Signaling molecules and interaction//Environmental Information Processing	GO:0044425//membrane part;GO:0031224//intrinsic component of membrane;GO:0016020//membrane	GO:0016787//hydrolase activity;GO:0004871//signal transducer activity;GO:0008528//G-protein coupled peptide receptor activity;GO:0060089//molecular transducer activity;GO:0004930//G-protein coupled receptor activity;GO:0001653//peptide receptor activity;GO:0003824//catalytic activity;GO:0099600//transmembrane receptor activity;GO:0004888//transmembrane signaling receptor activity;GO:0004872//rece…	GO:0007186//G-protein coupled receptor signaling pathway;GO:0050789//regulation of biological process;GO:0008152//metabolic process;GO:0051604//protein maturation;GO:0051716//cellular response to stimulus;GO:0007165//signal transduction;GO:0007154//cell communication;GO:0044700//single organism signaling;GO:0010467//gene expression;GO:0043170//macromolecule metabolic process;GO:0050794//regulatio…
Unigene0000281	7	9.33333333333333	0.1062	0.5231	0.5465	0.2922	0.8237	0.3898	0.391933333333333	0.5019	0.356791668922407	0.722591725737303	1	no	drl	PREDICTED: gastrula zinc finger protein XlCGF8.2DB-like [Sinocyclocheilus grahami]	-	-	-	-
Unigene0000282	6.33333333333333	15.6666666666667	0.3959	0.3792	0.2037	1.0892	0.9321	0.2724	0.326266666666667	0.764566666666667	1.22859070268988	0.128172320343063	1	no	-	--	-	-	-	-
Unigene0000283	173.333333333333	247	0.7227	0.9950	0.7531	0.8003	1.3647	1.1593	0.8236	1.1081	0.428072347562531	0.331847935754164	1	no	HMCN1	PREDICTED: hemicentin-1-like [Sinocyclocheilus rhinocerous]	-	-	-	GO:0048856//anatomical structure development;GO:0032502//developmental process;GO:0007275//multicellular organism development;GO:0033333//fin development;GO:0044767//single-organism developmental process;GO:0044699//single-organism process;GO:0044707//single-multicellular organism process;GO:0032501//multicellular organismal process;GO:0048736//appendage development
Unigene0000284	285.666666666667	389.666666666667	4.9570	5.3697	4.7703	6.1589	5.8478	7.1398	5.03233333333333	6.38216666666667	0.342818797186824	0.385772977962042	1	no	-	--	-	-	-	-
Unigene0000285	16.3333333333333	14.6666666666667	0.9129	0.4441	1.2004	0.5581	0.6181	0.9771	0.852466666666667	0.717766666666667	-0.248128497219836	0.736742265541867	1	no	-	--	-	-	-	-
Unigene0000286	211	247	3.3585	4.2425	2.1924	3.9886	4.3108	2.4975	3.26446666666667	3.59896666666667	0.140735429962978	0.760601707395077	1	no	-	--	-	-	-	-
Unigene0000287	9.33333333333333	14	0.1958	0.2143	1.0075	0.3591	0.5423	1.0778	0.472533333333333	0.659733333333333	0.481466896421351	0.605041735880568	1	no	-	--	-	-	-	-
Unigene0000288	5.33333333333333	15.6666666666667	0.2415	0.2643	0.4970	0.4982	1.3376	0.9969	0.334266666666667	0.944233333333333	1.49814391842306	0.0617076124808412	1	no	-	--	-	-	-	-
Unigene0000289	246.333333333333	302	2.1528	3.8302	1.9424	4.9961	2.1929	1.6662	2.6418	2.95173333333333	0.160041140647684	0.753329965090346	1	no	-	--	-	-	-	-
Unigene0000290	19	15	0.6776	1.1410	1.2874	1.0993	0.8662	0.3347	1.03533333333333	0.766733333333333	-0.433298522266981	0.5498607937354	1	no	-	--	-	-	-	-
Unigene0000291	1110.33333333333	1568.66666666667	4.4891	5.7047	4.6856	9.3001	5.1534	4.9036	4.9598	6.45236666666667	0.379546478160674	0.331282238968103	1	no	GK	PREDICTED: glycerol kinase-like isoform X5 [Sinocyclocheilus anshuiensis]	ko01100//Metabolic pathways//Global and Overview//Metabolism;ko03320//PPAR signaling pathway//Endocrine system//Organismal Systems;ko00561//Glycerolipid metabolism//Lipid metabolism//Metabolism	-	-	-
Unigene0000292	10.6666666666667	15.3333333333333	0.4132	0.9798	0.9212	0.4420	1.5258	1.2004	0.7714	1.05606666666667	0.453149859974583	0.534235757992949	1	no	-	--	-	-	-	-
Unigene0000293	383.333333333333	315.333333333333	1.6725	2.2624	1.7115	1.3312	1.5719	1.4439	1.88213333333333	1.449	-0.377311239614273	0.345110830927472	1	no	TTLL7	PREDICTED: tubulin polyglutamylase TTLL7 [Sinocyclocheilus rhinocerous]	-	-	-	GO:0018193//peptidyl-amino acid modification;GO:0043412//macromolecule modification;GO:0044238//primary metabolic process;GO:0009987//cellular process;GO:0008152//metabolic process;GO:0071704//organic substance metabolic process;GO:0044260//cellular macromolecule metabolic process;GO:0019538//protein metabolic process;GO:0043170//macromolecule metabolic process;GO:0018200//peptidyl-glutamic acid …
Unigene0000294	6	5.66666666666667	0.0000	0.3152	0.7704	0.3169	0.4466	0.2113	0.361866666666667	0.324933333333333	-0.155314469695516	0.936578945155827	1	no	-	--	-	-	-	-
Unigene0000295	50.6666666666667	65	2.5070	1.9109	2.6259	1.7652	3.4717	3.3678	2.34793333333333	2.86823333333333	0.288770947853031	0.583788299550041	1	no	-	PREDICTED: SH3 domain-containing protein C23A1.17-like [Sinocyclocheilus anshuiensis]	-	-	-	-
Unigene0000296	59.6666666666667	95.3333333333333	5.1568	7.1490	3.8031	5.2804	9.3313	9.5409	5.36963333333333	8.05086666666667	0.584320519265946	0.257256117201545	1	no	-	--	-	-	-	-
Unigene0000297	72	65	3.3619	6.9423	4.1123	3.8389	6.0435	2.5023	4.8055	4.12823333333333	-0.219162031401283	0.691624240584313	1	no	Wfdc3	PREDICTED: WAP four-disulfide core domain protein 3-like [Sinocyclocheilus anshuiensis]	-	-	-	-
Unigene0000298	713.666666666667	741	9.6321	7.8946	6.5633	8.2555	8.6761	6.6773	8.03	7.86963333333333	-0.0291035693548012	0.940029652276116	1	no	Rpp40	PREDICTED: ribonuclease P protein subunit p40-like [Sinocyclocheilus rhinocerous]	ko03013//RNA transport//Translation//Genetic Information Processing;ko03008//Ribosome biogenesis in eukaryotes//Translation//Genetic Information Processing	-	-	-
Unigene0000299	176.666666666667	207.333333333333	1.2983	2.0162	1.5527	2.9280	1.4383	0.8853	1.6224	1.75053333333333	0.109664976107345	0.83101461927933	1	no	-	PREDICTED: CCR4-NOT transcription complex subunit 6-like isoform X4 [Sinocyclocheilus grahami]	-	-	-	-
Unigene0000300	25.3333333333333	15.3333333333333	0.4186	1.9698	0.9906	0.6525	0.0000	1.1136	1.12633333333333	0.5887	-0.936029317017255	0.324314106133186	1	no	-	PREDICTED: uncharacterized protein LOC101885994 [Danio rerio]	-	-	-	-
Unigene0000301	316	272	20.6108	13.9753	17.3385	10.2514	15.9073	16.2353	17.3082	14.1313333333333	-0.292558101960038	0.491708712418687	1	no	-	--	-	-	-	-
Unigene0000302	16.3333333333333	9.33333333333333	0.6982	1.1463	1.1377	0.5336	0.9669	0.1601	0.994066666666667	0.553533333333333	-0.844672411212735	0.257449546637458	1	no	-	PREDICTED: RNA-directed DNA polymerase from mobile element jockey-like [Danio rerio]	-	-	-	-
Unigene0000303	87.3333333333333	161.333333333333	0.3189	0.7756	0.5348	0.9423	1.0141	0.8398	0.5431	0.932066666666667	0.7792152849969	0.112055913233705	1	no	LRFN2	PREDICTED: leucine-rich repeat and fibronectin type-III domain-containing protein 2-like [Sinocyclocheilus grahami]	-	-	-	-
Unigene0000304	143.666666666667	203.333333333333	9.2036	11.6175	6.8192	17.8917	11.2159	7.1489	9.21343333333333	12.0855	0.391466387667545	0.424679108365148	1	no	-	--	-	-	-	-
Unigene0000305	3098.33333333333	3489.33333333333	18.6767	19.6100	16.9403	23.0301	17.4786	17.3020	18.409	19.2702333333333	0.0659627807810292	0.845992423009975	1	no	GANAB	PREDICTED: neutral alpha-glucosidase AB-like isoform X1 [Sinocyclocheilus grahami]	ko01100//Metabolic pathways//Global and Overview//Metabolism;ko04141//Protein processing in endoplasmic reticulum//Folding, sorting and degradation//Genetic Information Processing;ko00510//N-Glycan biosynthesis//Glycan biosynthesis and metabolism//Metabolism	-	-	-
Unigene0000306	672.666666666667	851.666666666667	13.1036	15.0143	12.2980	16.4202	16.0920	15.2825	13.4719666666667	15.9315666666667	0.241927670622507	0.508941529084124	1	no	-	PREDICTED: TBC1 domain family member 5-like [Sinocyclocheilus grahami]	-	-	GO:0030234//enzyme regulator activity;GO:0005096//GTPase activator activity;GO:0008047//enzyme activator activity;GO:0030695//GTPase regulator activity;GO:0060589//nucleoside-triphosphatase regulator activity;GO:0098772//molecular function regulator	-
Unigene0000307	4.66666666666667	7	0.4424	0.0968	0.0911	0.4868	0.1960	0.2029	0.2101	0.295233333333333	0.490779456134644	0.640380521328334	1	no	-	--	-	-	-	-
Unigene0000308	584.666666666667	718.666666666667	2.7840	1.7183	3.7572	3.1345	2.6797	3.6720	2.75316666666667	3.16206666666667	0.199775836656376	0.628640587632112	1	no	nphp3	PREDICTED: nephrocystin-3-like [Sinocyclocheilus anshuiensis]	-	-	-	GO:0044767//single-organism developmental process;GO:0048568//embryonic organ development;GO:0048856//anatomical structure development;GO:0032501//multicellular organismal process;GO:0009888//tissue development;GO:0002009//morphogenesis of an epithelium;GO:0009887//organ morphogenesis;GO:0060429//epithelium development;GO:0060562//epithelial tube morphogenesis;GO:0072359//circulatory system devel…
Unigene0000309	12	11	0.9611	0.6762	0.9184	0.5666	0.6845	0.9448	0.8519	0.731966666666667	-0.218906139591281	0.797249754399794	1	no	-	--	-	-	-	-
Unigene0000310	2.33333333333333	8.33333333333333	0.0000	0.3496	0.0548	0.0976	0.9436	0.3419	0.1348	0.461033333333333	1.77405056670789	0.169254840578618	1	no	-	Retrovirus-related Pol polyprotein LINE-1 [Larimichthys crocea]	-	-	-	-
Unigene0000311	22.3333333333333	24	1.4726	1.4774	1.3259	1.1253	1.4275	1.7450	1.4253	1.4326	0.00737023458024952	1	1	no	PEG10	PREDICTED: C-Jun-amino-terminal kinase-interacting protein 1-like [Cyprinus carpio]	-	-	-	-
Unigene0000312	1320	1443.33333333333	8.8219	9.9182	9.5728	6.7989	10.4275	11.8347	9.43763333333333	9.68703333333333	0.0376297844051105	0.919827453973913	1	no	samhd1	PREDICTED: deoxynucleoside triphosphate triphosphohydrolase SAMHD1 isoform X1 [Sinocyclocheilus rhinocerous]	-	GO:0005622//intracellular;GO:0043227//membrane-bounded organelle;GO:0005623//cell;GO:0044424//intracellular part;GO:0043231//intracellular membrane-bounded organelle;GO:0043226//organelle;GO:0043229//intracellular organelle;GO:0044464//cell part	GO:0042578//phosphoric ester hydrolase activity;GO:0032560//guanyl deoxyribonucleotide binding;GO:0046872//metal ion binding;GO:0017076//purine nucleotide binding;GO:0097159//organic cyclic compound binding;GO:0016787//hydrolase activity;GO:0005488//binding;GO:0043167//ion binding;GO:0046914//transition metal ion binding;GO:0003676//nucleic acid binding;GO:1901265//nucleoside phosphate binding;GO…	GO:0009166//nucleotide catabolic process;GO:0046386//deoxyribose phosphate catabolic process;GO:1901564//organonitrogen compound metabolic process;GO:0019637//organophosphate metabolic process;GO:0072521//purine-containing compound metabolic process;GO:0046483//heterocycle metabolic process;GO:0009394//2'-deoxyribonucleotide metabolic process;GO:0006163//purine nucleotide metabolic process;GO:190…
Unigene0000313	8	18.3333333333333	0.2408	0.5272	0.7435	0.8282	0.5336	1.7676	0.503833333333333	1.04313333333333	1.0499050967221	0.169641013326988	1	no	-	--	-	-	-	-
Unigene0000314	14.6666666666667	17	1.0121	0.4984	0.7811	0.8816	0.6167	0.9749	0.763866666666667	0.8244	0.110023667828214	0.882989260893	1	no	-	--	-	-	-	-
Unigene0000315	7.66666666666667	13.3333333333333	0.5910	0.0000	0.7907	1.2465	0.5238	0.4880	0.460566666666667	0.752766666666667	0.708792744945957	0.455750864577594	1	no	-	--	-	-	-	-
Unigene0000316	31.3333333333333	28.3333333333333	2.4232	2.0053	1.3380	1.9510	1.2441	1.6267	1.92216666666667	1.60726666666667	-0.25812412337342	0.66349315954749	1	no	-	--	-	-	-	-
Unigene0000317	64.6666666666667	74.6666666666667	2.8761	1.5023	2.1525	2.9669	2.0276	2.0689	2.17696666666667	2.35446666666667	0.113080980443664	0.834825669423686	1	no	-	--	-	-	-	-
Unigene0000318	1	0	0.0000	0.0000	0.2873	0.0000	0.0000	0.0000	0.0957666666666667	0.001	-6.58145168192401	0.350195906882197	1	no	-	--	-	-	-	-
Unigene0000319	72.6666666666667	64.6666666666667	1.3078	1.5431	1.7874	1.3678	1.2224	1.2560	1.5461	1.28206666666667	-0.270162351015599	0.586764728880019	1	no	-	PREDICTED: ATP-binding cassette sub-family G member 2-like [Sinocyclocheilus rhinocerous]	-	-	-	-
Unigene0000320	50.3333333333333	14.3333333333333	0.7407	4.9858	0.3049	0.9849	0.2052	0.3058	2.01046666666667	0.498633333333333	-2.01147918215237	0.0324116294002344	1	no	-	--	-	-	-	-
Unigene0000321	16.6666666666667	28.3333333333333	0.7168	1.5036	0.9220	1.2050	0.9926	2.6303	1.04746666666667	1.6093	0.619528959182242	0.350154301741052	1	no	TY3B-I	PREDICTED: adhesion G protein-coupled receptor E1-like [Danio rerio]	ko03013//RNA transport//Translation//Genetic Information Processing	-	-	-
Unigene0000322	43.6666666666667	62	0.2657	1.2246	0.4606	0.7823	0.7902	0.9495	0.6503	0.840666666666667	0.37042844605417	0.544664340055043	1	no	IFIT1	PREDICTED: interferon-induced protein with tetratricopeptide repeats 5-like [Cyprinus carpio]	-	-	-	-
Unigene0000323	10.6666666666667	13.3333333333333	0.3037	0.1899	0.9376	0.2785	0.5287	0.8757	0.477066666666667	0.560966666666667	0.233724159988136	0.797300076472645	1	no	-	--	-	-	-	-
Unigene0000324	156.333333333333	161.333333333333	2.2563	2.8918	2.1233	2.8176	1.7103	2.3559	2.4238	2.2946	-0.0790279780480287	0.86480456591843	1	no	FAM46A	PREDICTED: protein FAM46A-like [Sinocyclocheilus rhinocerous]	-	-	-	-
Unigene0000325	4789.66666666667	4259.66666666667	44.7238	37.5352	31.4013	34.5798	33.1217	27.3445	37.8867666666667	31.682	-0.258030610810875	0.447210957920629	1	no	stk3	PREDICTED: serine/threonine-protein kinase 3 [Sinocyclocheilus rhinocerous]	ko04010//MAPK signaling pathway//Signal transduction//Environmental Information Processing	GO:0044424//intracellular part;GO:0005622//intracellular;GO:0005623//cell;GO:0043226//organelle;GO:0043229//intracellular organelle;GO:0043227//membrane-bounded organelle;GO:0043231//intracellular membrane-bounded organelle;GO:0044464//cell part	GO:0016301//kinase activity;GO:0016773//phosphotransferase activity, alcohol group as acceptor;GO:0004672//protein kinase activity;GO:0005488//binding;GO:0001883//purine nucleoside binding;GO:0043169//cation binding;GO:0001882//nucleoside binding;GO:0032550//purine ribonucleoside binding;GO:1901363//heterocyclic compound binding;GO:0003824//catalytic activity;GO:0016740//transferase activity;GO:0…	GO:0012501//programmed cell death;GO:0008219//cell death;GO:0009987//cellular process;GO:0016265//death;GO:0051716//cellular response to stimulus;GO:0044699//single-organism process;GO:0006796//phosphate-containing compound metabolic process;GO:0023052//signaling;GO:0044237//cellular metabolic process;GO:0007154//cell communication;GO:0050789//regulation of biological process;GO:0044763//single-o…
Unigene0000326	10	16.3333333333333	0.7123	0.8995	0.1128	0.5526	1.0319	1.0556	0.574866666666667	0.880033333333333	0.614330790970889	0.431135025317515	1	no	-	--	-	-	-	-
Unigene0000327	0.333333333333333	2.66666666666667	0.0573	0.0000	0.0000	0.3678	0.0635	0.0000	0.0191	0.143766666666667	2.9120846719776	0.177469544635392	1	no	-	--	-	-	-	-
Unigene0000328	1936.33333333333	1543.66666666667	9.6366	4.8446	9.0696	5.0737	5.7590	6.8862	7.85026666666667	5.9063	-0.410487024459871	0.287371492964669	1	no	Akna	PREDICTED: AT-hook-containing transcription factor-like isoform X2 [Sinocyclocheilus grahami]	-	-	-	-
Unigene0000329	58.6666666666667	93.6666666666667	0.9230	0.9579	1.0317	2.1305	1.0226	1.1242	0.970866666666667	1.42576666666667	0.554392814569997	0.28136936384328	1	no	-	--	-	-	-	-
Unigene0000330	222.666666666667	219	8.9434	7.1314	6.0479	7.9958	6.6171	5.7727	7.37423333333333	6.7952	-0.117977052690336	0.785596882478281	1	no	-	--	-	-	-	-
Unigene0000331	108.333333333333	191.333333333333	0.5653	1.3921	1.2604	2.3932	1.8162	1.0632	1.0726	1.75753333333333	0.712439893201272	0.168560210952057	1	no	TC2N	PREDICTED: tandem C2 domains nuclear protein-like [Sinocyclocheilus rhinocerous]	-	-	-	-
Unigene0000332	6.33333333333333	14.3333333333333	0.5286	0.1157	0.3808	1.0179	0.8199	0.3880	0.3417	0.741933333333333	1.1185593110595	0.15515504661421	1	no	-	--	-	-	-	-
Unigene0000333	85.6666666666667	112	0.3927	1.2894	0.7439	0.8020	1.4041	0.7861	0.808666666666667	0.9974	0.302627058378397	0.590146419117892	1	no	Adgra1	PREDICTED: adhesion G protein-coupled receptor A1 [Danio rerio]	-	-	-	-
Unigene0000334	5.33333333333333	11.6666666666667	0.4492	0.3073	0.1734	0.6179	0.6843	0.6182	0.309966666666667	0.640133333333333	1.0462593566157	0.159348809931527	1	no	-	--	-	-	-	-
Unigene0000335	4267	3982	29.5489	10.6998	47.3188	15.7782	17.3425	42.8887	29.1891666666667	25.3364666666667	-0.20421767794535	0.69349552086252	1	no	ttll6	PREDICTED: tubulin polyglutamylase ttll6-like [Sinocyclocheilus grahami]	-	GO:0005815//microtubule organizing center;GO:0043229//intracellular organelle;GO:0043232//intracellular non-membrane-bounded organelle;GO:0043226//organelle;GO:0005623//cell;GO:0044424//intracellular part;GO:0043228//non-membrane-bounded organelle;GO:0044422//organelle part;GO:0005622//intracellular;GO:0044446//intracellular organelle part;GO:0044430//cytoskeletal part;GO:0044464//cell part;GO:00…	GO:0070739//protein-glutamic acid ligase activity;GO:0016879//ligase activity, forming carbon-nitrogen bonds;GO:0008092//cytoskeletal protein binding;GO:0005488//binding;GO:0016874//ligase activity;GO:0005515//protein binding;GO:0016881//acid-amino acid ligase activity;GO:0003824//catalytic activity	GO:0018193//peptidyl-amino acid modification;GO:0001578//microtubule bundle formation;GO:0009987//cellular process;GO:0006996//organelle organization;GO:0000226//microtubule cytoskeleton organization;GO:0007017//microtubule-based process;GO:0044238//primary metabolic process;GO:0044763//single-organism cellular process;GO:0071840//cellular component organization or biogenesis;GO:0036211//protein …
Unigene0000336	24	24	0.7980	1.1013	0.7141	1.6862	0.3460	0.3183	0.871133333333333	0.7835	-0.152960276063174	0.842138624028154	1	no	-	--	-	-	-	-
Unigene0000337	24	38	1.2582	0.9022	1.0716	1.6312	1.9708	1.2738	1.07733333333333	1.62526666666667	0.593211751304464	0.297879352096702	1	no	-	--	-	-	-	-
Unigene0000338	282.333333333333	282.666666666667	1.9540	5.5912	2.9920	4.4255	1.3171	3.6393	3.5124	3.1273	-0.167539528815082	0.758102410079448	1	no	prodh2	PREDICTED: probable proline dehydrogenase 2 [Sinocyclocheilus grahami]	ko01100//Metabolic pathways//Global and Overview//Metabolism;ko00330//Arginine and proline metabolism//Amino acid metabolism//Metabolism	-	GO:0016491//oxidoreductase activity;GO:0003824//catalytic activity;GO:0016645//oxidoreductase activity, acting on the CH-NH group of donors	GO:0044238//primary metabolic process;GO:0009987//cellular process;GO:0043648//dicarboxylic acid metabolic process;GO:0006560//proline metabolic process;GO:0071704//organic substance metabolic process;GO:1901605//alpha-amino acid metabolic process;GO:1901564//organonitrogen compound metabolic process;GO:0046483//heterocycle metabolic process;GO:0006807//nitrogen compound metabolic process;GO:0006…
Unigene0000339	4.66666666666667	5.66666666666667	0.2865	0.4390	0.1179	0.3678	0.4443	0.1577	0.281133333333333	0.323266666666667	0.201470232117199	0.916394390544763	1	no	-	--	-	-	-	-
Unigene0000340	15.3333333333333	12	1.0127	1.4344	0.4291	0.4370	0.7260	0.9291	0.958733333333333	0.697366666666667	-0.459212186372225	0.543581748747092	1	no	PCDHGB7	PREDICTED: protocadherin gamma-B7-like [Sinocyclocheilus anshuiensis]	-	GO:0016020//membrane	-	GO:0007155//cell adhesion;GO:0022610//biological adhesion
Unigene0000341	342.333333333333	798.666666666667	2.6471	6.3842	3.9319	15.3546	4.6311	7.1317	4.32106666666667	9.03913333333333	1.06479696512276	0.0351849033711392	1	no	-	PREDICTED: guanylate cyclase 2G-like [Sinocyclocheilus grahami]	-	-	-	-
Unigene0000342	13	30	0.5250	0.7662	1.0806	3.1026	0.7756	1.0704	0.7906	1.64953333333333	1.06103807152707	0.133858278925391	1	no	-	--	-	-	-	-
Unigene0000343	598.333333333333	471.666666666667	15.4900	16.6148	20.3663	13.6111	14.3577	10.9870	17.4903666666667	12.9852666666667	-0.429684892478988	0.262932142001961	1	no	-	--	-	-	-	-
Unigene0000344	62.3333333333333	66	0.7355	0.7610	1.1008	0.5763	1.3036	0.7729	0.865766666666667	0.884266666666667	0.0305032504461049	0.966156561599269	1	no	-	PREDICTED: RNA-directed DNA polymerase from mobile element jockey-like [Danio rerio]	-	-	-	-
Unigene0000345	13.6666666666667	15	0.7783	0.7950	0.6407	0.6661	0.6898	0.9044	0.738	0.753433333333333	0.0298590460026698	1	1	no	-	--	-	-	-	-
Unigene0000346	2954	2974.66666666667	49.4520	50.7180	44.7279	32.9109	58.8767	46.9687	48.2993	46.2521	-0.0624834099907183	0.860695579497053	1	no	eed	PREDICTED: polycomb protein EED [Cyprinus carpio]	-	GO:0043231//intracellular membrane-bounded organelle;GO:0005623//cell;GO:0043226//organelle;GO:0044464//cell part;GO:0043227//membrane-bounded organelle;GO:0005622//intracellular;GO:0043229//intracellular organelle;GO:0044424//intracellular part	-	GO:0044238//primary metabolic process;GO:0034645//cellular macromolecule biosynthetic process;GO:0016070//RNA metabolic process;GO:0032774//RNA biosynthetic process;GO:0044249//cellular biosynthetic process;GO:0009987//cellular process;GO:1901360//organic cyclic compound metabolic process;GO:0016043//cellular component organization;GO:0034654//nucleobase-containing compound biosynthetic process;G…
Unigene0000347	13.3333333333333	14.6666666666667	0.3963	0.5521	0.5561	1.0902	0.1197	0.2644	0.5015	0.491433333333333	-0.0292539835449461	1	1	no	-	--	-	-	-	-
Unigene0000348	440	559.333333333333	1.5746	2.7604	2.0936	2.8409	2.6449	2.1179	2.14286666666667	2.53456666666667	0.242197026096518	0.54793757976488	1	no	grid2	PREDICTED: glutamate receptor ionotropic, delta-2 isoform X1 [Danio rerio]	ko04080//Neuroactive ligand-receptor interaction//Signaling molecules and interaction//Environmental Information Processing	-	-	-
Unigene0000349	10	26.6666666666667	0.0446	0.1463	0.0917	0.2288	0.3653	0.1226	0.0942	0.2389	1.34260788884355	0.0542253715068992	1	no	ADGRD2	PREDICTED: adhesion G-protein coupled receptor D2-like [Sinocyclocheilus anshuiensis]	-	-	-	-
Unigene0000350	58	39.3333333333333	2.3962	2.4645	0.3862	1.4560	0.8316	0.9800	1.74896666666667	1.0892	-0.683233905885884	0.306981074206454	1	no	-	--	-	-	-	-
Unigene0000351	20.6666666666667	26.6666666666667	0.7253	0.7938	0.6107	1.3907	0.8036	0.3630	0.709933333333333	0.852433333333333	0.263903455064647	0.697287586353946	1	no	TRIM16	PREDICTED: tripartite motif-containing protein 16-like, partial [Sinocyclocheilus rhinocerous]	-	-	-	-
Unigene0000352	2	8	0.0000	0.0000	0.3895	0.2892	0.4193	0.7523	0.129833333333333	0.486933333333333	1.90706343703519	0.1167641630105	1	no	-	--	-	-	-	-
Unigene0000353	15	14.3333333333333	1.2965	1.3443	0.5618	1.0637	1.3607	0.5008	1.06753333333333	0.975066666666667	-0.130708351750615	0.847709904121697	1	no	-	--	-	-	-	-
Unigene0000354	23	16.3333333333333	1.2052	1.0413	2.2846	0.8725	0.6325	1.4548	1.51036666666667	0.9866	-0.614361637877577	0.347714808692008	1	no	-	--	-	-	-	-
Unigene0000355	8	6	0.6123	0.4467	0.6301	0.3743	0.3768	0.4369	0.563033333333333	0.396	-0.507719906585227	0.502693911315953	1	no	-	--	-	-	-	-
Unigene0000356	11	15	0.6807	0.9933	0.2918	0.8322	1.0054	0.6765	0.655266666666667	0.838033333333333	0.354925485342442	0.621892593652823	1	no	-	PREDICTED: piggyBac transposable element-derived protein 4-like [Cyprinus carpio]	-	-	-	-
Unigene0000357	2.33333333333333	6.66666666666667	0.1871	0.0000	0.2568	0.6864	0.4146	0.1145	0.147966666666667	0.405166666666667	1.453243279591	0.223047138507022	1	no	-	--	-	-	-	-
Unigene0000358	14.3333333333333	15	0.3243	0.4732	0.8157	0.5616	0.5987	0.4297	0.537733333333333	0.53	-0.0208985453467949	1	1	no	-	--	-	-	-	-
Unigene0000359	24	24.6666666666667	1.0572	0.3471	2.5022	1.1148	1.2298	1.4548	1.30216666666667	1.26646666666667	-0.0401050075734184	0.976887289507464	1	no	-	--	-	-	-	-
Unigene0000360	617	549.666666666667	47.3564	32.4122	50.7689	27.4689	38.3275	44.0094	43.5125	36.6019333333333	-0.249510054517584	0.53264886837408	1	no	NDUFB1	PREDICTED: NADH dehydrogenase [ubiquinone] 1 beta subcomplex subunit 1 [Ictalurus punctatus]	ko01100//Metabolic pathways//Global and Overview//Metabolism;ko00190//Oxidative phosphorylation//Energy metabolism//Metabolism	GO:0044464//cell part;GO:0005623//cell;GO:0005622//intracellular;GO:0044424//intracellular part;GO:0043229//intracellular organelle;GO:0043226//organelle;GO:0043231//intracellular membrane-bounded organelle;GO:0043227//membrane-bounded organelle	-	GO:0008152//metabolic process;GO:0044710//single-organism metabolic process;GO:0044699//single-organism process
Unigene0000361	161.666666666667	175.333333333333	2.3387	2.3987	2.0078	2.3528	1.7618	2.6360	2.2484	2.2502	0.00115451527683488	1	1	no	ric3	PREDICTED: protein RIC-3-like isoform X2 [Sinocyclocheilus anshuiensis]	-	-	-	-
Unigene0000362	16	28.6666666666667	0.4657	0.9101	0.3081	1.1590	0.7370	0.8544	0.5613	0.9168	0.707834984794965	0.268958578074487	1	no	-	--	-	-	-	-
Unigene0000363	18.3333333333333	23.3333333333333	0.8842	1.4194	1.0919	1.3513	1.1102	1.5143	1.13183333333333	1.32526666666667	0.227621152579925	0.717823985860467	1	no	-	hypothetical protein XENTR_v900217182mg, partial [Xenopus tropicalis]	-	-	-	-
Unigene0000364	12.3333333333333	17.3333333333333	0.1521	0.4163	0.9003	0.5232	0.4635	0.9073	0.489566666666667	0.631333333333333	0.366896592987313	0.648213560106941	1	no	-	--	-	-	-	-
Unigene0000365	7.66666666666667	7.33333333333333	0.2041	1.4147	0.0700	0.6862	0.3768	0.3745	0.562933333333333	0.479166666666667	-0.232436527740692	0.846832188619102	1	no	MYO7B	PREDICTED: unconventional myosin-VIIa isoform X1 [Danio rerio]	-	-	-	-
Unigene0000366	194.333333333333	311	1.5464	1.7024	2.2975	1.9214	2.9093	3.5005	1.84876666666667	2.77706666666667	0.586998657813439	0.181317420975839	1	no	SLC12A1	PREDICTED: solute carrier family 12 member 1 [Scleropages formosus]	-	GO:0043226//organelle;GO:0031988//membrane-bounded vesicle;GO:0043227//membrane-bounded organelle;GO:0031982//vesicle;GO:0016020//membrane	GO:0005215//transporter activity;GO:0015291//secondary active transmembrane transporter activity;GO:0015294//solute:cation symporter activity;GO:0022892//substrate-specific transporter activity;GO:0008324//cation transmembrane transporter activity;GO:0015103//inorganic anion transmembrane transporter activity;GO:0022891//substrate-specific transmembrane transporter activity;GO:0015377//cation:chl…	GO:0051179//localization;GO:0006811//ion transport;GO:0044699//single-organism process;GO:0044765//single-organism transport;GO:0044763//single-organism cellular process;GO:0006812//cation transport;GO:0051234//establishment of localization;GO:0006820//anion transport;GO:0006821//chloride transport;GO:0009987//cellular process;GO:0030001//metal ion transport;GO:0006810//transport;GO:0015698//inor…
Unigene0000367	6.33333333333333	10.3333333333333	0.2665	0.3646	0.6856	1.2218	0.4428	0.3056	0.4389	0.656733333333333	0.581415412717569	0.559737081565572	1	no	-	novel immune-type receptor 1f, allele 2 [Danio rerio]	-	-	-	-
Unigene0000368	37.3333333333333	49.6666666666667	0.3796	0.4155	0.2858	0.5689	0.4616	0.3143	0.3603	0.448266666666667	0.315158572088222	0.569748292176001	1	no	Cdca4	PREDICTED: cell division cycle-associated protein 4-like isoform X1 [Sinocyclocheilus grahami]	-	-	-	-
Unigene0000369	3.66666666666667	7.33333333333333	0.1302	0.3561	0.2679	0.8952	0.2163	0.2388	0.2514	0.4501	0.840260914965044	0.43573957244279	1	no	-	PREDICTED: cullin-9-like [Sinocyclocheilus rhinocerous]	-	-	-	-
Unigene0000370	2	3	0.1019	0.0000	0.2097	0.1401	0.0000	0.2804	0.103866666666667	0.140166666666667	0.432410567080836	0.875137522539412	1	no	-	--	-	-	-	-
Unigene0000371	17	12.6666666666667	0.5953	0.9582	0.3243	0.2248	0.5820	0.5141	0.625933333333333	0.4403	-0.507522163056977	0.479529212187128	1	no	-	--	-	-	-	-
Unigene0000372	3621	4455.33333333333	15.5287	18.2335	15.1359	17.6717	21.7807	17.2209	16.2993666666667	18.8911	0.212890802376762	0.525445579676769	1	no	PER2	PREDICTED: period circadian protein homolog 2-like isoform X1 [Pygocentrus nattereri]	-	-	-	-
Unigene0000373	11.6666666666667	14	0.7578	0.7109	0.5013	0.7942	0.3598	0.9932	0.656666666666667	0.715733333333333	0.124260946969081	0.908725591180745	1	no	-	--	-	-	-	-
Unigene0000374	7177	6726.33333333333	66.4107	67.0971	57.7029	74.2191	56.5796	36.9163	63.7369	55.905	-0.18915153203279	0.597196943940529	1	no	DEK	PREDICTED: protein DEK-like [Sinocyclocheilus grahami]	-	-	GO:0005488//binding;GO:0003676//nucleic acid binding;GO:0097159//organic cyclic compound binding;GO:1901363//heterocyclic compound binding	-
Unigene0000375	14.6666666666667	21.3333333333333	0.4086	1.3913	0.3270	0.8742	0.9556	0.9996	0.708966666666667	0.943133333333333	0.411743944877306	0.556230621387591	1	no	-	--	-	-	-	-
Unigene0000376	8	6.66666666666667	0.4609	0.5044	0.6776	0.3623	0.5106	0.4228	0.547633333333333	0.4319	-0.342512946652595	0.646828492875134	1	no	-	--	-	-	-	-
Unigene0000377	13.6666666666667	27.6666666666667	0.2179	0.5168	0.8223	0.8992	0.8047	1.1995	0.519	0.9678	0.898974400631556	0.185526464263732	1	no	-	PREDICTED: neuron navigator 3-like [Poecilia mexicana]	-	-	-	-
Unigene0000378	181.666666666667	225.666666666667	1.5124	2.3522	1.1923	2.4331	1.5873	1.7446	1.68563333333333	1.92166666666667	0.189067358367865	0.680274169344581	1	no	nrarpb	PREDICTED: notch-regulated ankyrin repeat-containing protein B isoform X1 [Danio rerio]	-	-	-	-
Unigene0000379	15.3333333333333	7.66666666666667	0.7983	0.2184	0.5477	0.1220	0.2948	0.3357	0.521466666666667	0.250833333333333	-1.05584595419852	0.161845509550537	1	no	-	--	-	-	-	-
Unigene0000380	169	140.666666666667	2.9869	2.0326	3.0897	1.3766	1.4059	3.4502	2.70306666666667	2.07756666666667	-0.379702321874839	0.457055418180155	1	no	Rasd1	dexamethasone-induced Ras-related protein 1 [Danio rerio]	-	-	GO:0036094//small molecule binding;GO:0005488//binding	GO:0019693//ribose phosphate metabolic process;GO:0035556//intracellular signal transduction;GO:0006793//phosphorus metabolic process;GO:0009987//cellular process;GO:0006163//purine nucleotide metabolic process;GO:0071704//organic substance metabolic process;GO:0009117//nucleotide metabolic process;GO:0051716//cellular response to stimulus;GO:0046483//heterocycle metabolic process;GO:0034641//cel…
Unigene0000381	6560	5637.66666666667	307.9263	96.1505	492.1987	143.3998	176.3995	399.6058	298.7585	239.8017	-0.317137873570977	0.549670824177758	1	no	DYNLRB2	PREDICTED: dynein light chain roadblock-type 2 [Astyanax mexicanus]	-	-	-	-
Unigene0000382	14.3333333333333	12.3333333333333	0.1791	0.4900	1.3360	0.3695	0.5456	0.6982	0.668366666666667	0.537766666666667	-0.313659451028752	0.742821157889003	1	no	-	--	-	-	-	-
Unigene0000383	12	13.3333333333333	1.2433	0.8316	0.4976	0.8234	0.3061	1.4575	0.8575	0.862333333333333	0.00810897690340959	1	1	no	-	--	-	-	-	-
Unigene0000384	187	295.333333333333	1.8824	1.8465	1.4529	3.4360	2.0953	2.0447	1.72726666666667	2.52533333333333	0.547982997375593	0.208333198922865	1	no	eif3a	PREDICTED: protein LIAT1 [Pseudopodoces humilis]	-	-	-	-
Unigene0000385	188.333333333333	221.333333333333	1.3752	4.4368	2.7418	5.0177	2.2852	1.8136	2.85126666666667	3.03883333333333	0.0919145769138347	0.86947893804118	1	no	foxa2	PREDICTED: hepatocyte nuclear factor 3-beta [Sinocyclocheilus rhinocerous]	-	-	-	-
Unigene0000386	1336	1523	3.7813	2.5732	6.6535	4.7702	3.6146	5.4098	4.336	4.5982	0.0847044611548791	0.840043800705351	1	no	IGSF3	PREDICTED: immunoglobulin superfamily member 3-like [Sinocyclocheilus rhinocerous]	-	-	-	-
Unigene0000387	22.3333333333333	25.3333333333333	1.2642	0.5621	0.8944	0.7970	1.4881	0.7249	0.9069	1.00333333333333	0.145785601464402	0.842901545190623	1	no	pol	Pro-Pol polyprotein [Larimichthys crocea]	-	-	-	-
Unigene0000388	120.333333333333	304	0.6518	1.0969	0.9015	3.3997	1.5451	1.1831	0.8834	2.04263333333333	1.20929151618527	0.0172593828247921	0.879090764285493	no	Rasa4	PREDICTED: ras GTPase-activating protein 4-like isoform X1 [Sinocyclocheilus anshuiensis]	-	-	-	-
Unigene0000389	5.33333333333333	6.66666666666667	0.4070	0.5196	0.2094	0.4354	0.4508	0.4356	0.378666666666667	0.4406	0.218541066029994	0.916934015870089	1	no	FRRS1	si:dkey-251i10.2 precursor [Danio rerio]	-	-	-	-
Unigene0000390	10.3333333333333	9	0.4731	0.6213	0.4381	0.6941	0.4717	0.0868	0.510833333333333	0.417533333333333	-0.290961289860736	0.749722409994984	1	no	-	PREDICTED: contactin-3-like [Sinocyclocheilus anshuiensis]	-	-	-	-
Unigene0000391	1297.66666666667	1543	14.2136	11.5092	23.7667	11.5465	16.4271	27.0153	16.4965	18.3296333333333	0.152017960652833	0.724894673335826	1	no	cyhr1	PREDICTED: cysteine and histidine-rich protein 1 [Sinocyclocheilus rhinocerous]	-	GO:0005623//cell;GO:0005622//intracellular;GO:0044424//intracellular part;GO:0044464//cell part	GO:0046872//metal ion binding;GO:0005488//binding;GO:0043169//cation binding;GO:0043167//ion binding;GO:0046914//transition metal ion binding	GO:0070647//protein modification by small protein conjugation or removal;GO:0043412//macromolecule modification;GO:0008152//metabolic process;GO:0044260//cellular macromolecule metabolic process;GO:0009987//cellular process;GO:0019538//protein metabolic process;GO:0043170//macromolecule metabolic process;GO:0071704//organic substance metabolic process;GO:0044237//cellular metabolic process;GO:004…
Unigene0000392	621.333333333333	369.333333333333	12.0320	9.0375	3.8312	3.5320	3.8105	6.4056	8.30023333333333	4.5827	-0.856954048776559	0.0737748094338841	1	no	fsta	PREDICTED: follistatin-A-like [Sinocyclocheilus rhinocerous]	ko04350//TGF-beta signaling pathway//Signal transduction//Environmental Information Processing	-	-	-
Unigene0000393	228	413.666666666667	1.5090	2.4222	1.6165	2.5048	3.3005	3.5709	1.84923333333333	3.1254	0.757113569719333	0.0724366287793966	1	no	Pacs1	PREDICTED: phosphofurin acidic cluster sorting protein 2-like isoform X2 [Sinocyclocheilus anshuiensis]	-	-	-	-
Unigene0000394	3	6	0.1898	0.1385	0.2604	0.5800	0.0000	0.4642	0.196233333333333	0.348066666666667	0.826793531035183	0.45406834387761	1	no	-	--	-	-	-	-
Unigene0000395	26	13.6666666666667	1.5439	0.5358	0.9300	0.3453	0.7926	0.4146	1.00323333333333	0.5175	-0.955026421169704	0.163183821372253	1	no	-	--	-	-	-	-
Unigene0000396	1001.33333333333	1289.33333333333	5.9268	7.8767	5.7403	8.6659	8.6283	6.2770	6.5146	7.85706666666667	0.270314202380228	0.46644511943547	1	no	MAPT	PREDICTED: microtubule-associated protein tau-like isoform X3 [Sinocyclocheilus anshuiensis]	ko04010//MAPK signaling pathway//Signal transduction//Environmental Information Processing	-	-	-
Unigene0000397	30.3333333333333	32.3333333333333	1.8176	0.4973	2.3900	0.8796	1.5102	2.3623	1.5683	1.58403333333333	0.0144011359543482	1	1	no	-	--	-	-	-	-
Unigene0000398	15.6666666666667	10	1.3665	0.5202	0.9783	0.8717	0.0658	0.7086	0.955	0.5487	-0.799483157340601	0.355738978600046	1	no	-	--	-	-	-	-
Unigene0000399	12	12	0.4561	0.5615	1.1146	1.2546	0.4421	0.2615	0.710733333333333	0.652733333333333	-0.12281464742832	0.915640475871444	1	no	-	--	-	-	-	-
Unigene0000400	774.333333333333	962	6.4930	6.7790	10.0077	9.7669	7.3857	9.6567	7.7599	8.93643333333333	0.203661083855416	0.596023757464412	1	no	TMEM104	PREDICTED: transmembrane protein 104-like [Sinocyclocheilus grahami]	-	GO:0044425//membrane part;GO:0016020//membrane;GO:0031224//intrinsic component of membrane	-	-
Unigene0000401	39.6666666666667	40.3333333333333	1.8694	2.6505	0.7870	1.4805	1.7886	1.7540	1.76896666666667	1.67436666666667	-0.079291367232179	0.900849938227816	1	no	-	--	-	-	-	-
Unigene0000402	18.6666666666667	23.3333333333333	0.5486	0.6862	0.2957	0.5030	0.2605	0.9586	0.510166666666667	0.574033333333333	0.170165875637122	0.806136863066133	1	no	-	--	-	-	-	-
Unigene0000403	1762.33333333333	1717	14.7632	13.7058	10.9877	10.9432	13.7781	11.5744	13.1522333333333	12.0985666666667	-0.120471659546554	0.732548750995511	1	no	Fnta	protein farnesyltransferase/geranylgeranyltransferase type-1 subunit alpha [Danio rerio]	ko01130//Biosynthesis of antibiotics//Global and Overview//Metabolism;ko00900//Terpenoid backbone biosynthesis//Metabolism of terpenoids and polyketides//Metabolism	-	GO:0003824//catalytic activity;GO:0016740//transferase activity;GO:0016765//transferase activity, transferring alkyl or aryl (other than methyl) groups;GO:0004659//prenyltransferase activity	-
Unigene0000404	76.6666666666667	82	1.6190	1.4497	0.8414	1.6795	1.1595	1.0502	1.30336666666667	1.2964	-0.00773207814263416	1	1	no	-	--	-	-	-	-
Unigene0000405	2576.66666666667	2778	25.4281	14.3266	31.5846	15.0328	19.0052	37.6786	23.7797666666667	23.9055333333333	0.00761003357508164	0.986357569788097	1	no	b3gnt5a	PREDICTED: lactosylceramide 1,3-N-acetyl-beta-D-glucosaminyltransferase [Cyprinus carpio]	ko01100//Metabolic pathways//Global and Overview//Metabolism;ko00601//Glycosphingolipid biosynthesis - lacto and neolacto series//Glycan biosynthesis and metabolism//Metabolism	GO:0044424//intracellular part;GO:0043227//membrane-bounded organelle;GO:0044425//membrane part;GO:0005623//cell;GO:0044446//intracellular organelle part;GO:0005737//cytoplasm;GO:0016020//membrane;GO:0043226//organelle;GO:0012505//endomembrane system;GO:0044444//cytoplasmic part;GO:0043231//intracellular membrane-bounded organelle;GO:0044422//organelle part;GO:0005794//Golgi apparatus;GO:0044464/…	GO:0003824//catalytic activity;GO:0008194//UDP-glycosyltransferase activity;GO:0016758//transferase activity, transferring hexosyl groups;GO:0008375//acetylglucosaminyltransferase activity;GO:0016740//transferase activity;GO:0016757//transferase activity, transferring glycosyl groups	GO:0044237//cellular metabolic process;GO:0009987//cellular process;GO:0006464//cellular protein modification process;GO:0043170//macromolecule metabolic process;GO:0019538//protein metabolic process;GO:0071704//organic substance metabolic process;GO:0044238//primary metabolic process;GO:0043412//macromolecule modification;GO:0008152//metabolic process;GO:0036211//protein modification process;GO:…
Unigene0000406	1307.33333333333	1444	11.2511	9.7605	11.3814	8.8640	12.0677	12.7839	10.7976666666667	11.2385333333333	0.0577341859133772	0.873222549549975	1	no	e4f1	PREDICTED: transcription factor E4F1 isoform X2 [Sinocyclocheilus rhinocerous]	-	GO:0005634//nucleus;GO:0070013//intracellular organelle lumen;GO:0043226//organelle;GO:0043227//membrane-bounded organelle;GO:0005622//intracellular;GO:0043229//intracellular organelle;GO:0044464//cell part;GO:0044422//organelle part;GO:0044424//intracellular part;GO:0031974//membrane-enclosed lumen;GO:0043233//organelle lumen;GO:0031981//nuclear lumen;GO:0005623//cell;GO:0044428//nuclear part;GO…	GO:0003824//catalytic activity;GO:1901363//heterocyclic compound binding;GO:0097159//organic cyclic compound binding;GO:0005488//binding;GO:0003676//nucleic acid binding	GO:0044238//primary metabolic process;GO:0018130//heterocycle biosynthetic process;GO:0034654//nucleobase-containing compound biosynthetic process;GO:0044267//cellular protein metabolic process;GO:0032446//protein modification by small protein conjugation;GO:0044237//cellular metabolic process;GO:0043412//macromolecule modification;GO:0044271//cellular nitrogen compound biosynthetic process;GO:00…
Unigene0000407	10.3333333333333	9.33333333333333	0.4679	0.7042	0.7223	0.3218	0.7128	0.5902	0.631466666666667	0.5416	-0.221478841332798	0.776892848906902	1	no	-	--	-	-	-	-
Unigene0000408	7.33333333333333	4.33333333333333	0.5075	0.6942	0.2611	0.0582	0.6325	0.1746	0.4876	0.288433333333333	-0.757460224015335	0.428614886997594	1	no	-	--	-	-	-	-
Unigene0000409	696.333333333333	848.666666666667	4.5369	6.4798	3.5392	5.8743	6.6697	4.1378	4.85196666666667	5.5606	0.196670921982544	0.626488281958219	1	no	DACH2	PREDICTED: dachshund homolog 2-like isoform X1 [Cyprinus carpio]	-	GO:0043229//intracellular organelle;GO:0044464//cell part;GO:0043227//membrane-bounded organelle;GO:0044424//intracellular part;GO:0005622//intracellular;GO:0005623//cell;GO:0043231//intracellular membrane-bounded organelle;GO:0043226//organelle	-	GO:0044707//single-multicellular organism process;GO:0044767//single-organism developmental process;GO:0007275//multicellular organism development;GO:0048856//anatomical structure development;GO:0048731//system development;GO:0032501//multicellular organismal process;GO:0044699//single-organism process;GO:0031016//pancreas development;GO:0048513//animal organ development;GO:0032502//developmental…
Unigene0000410	40	38.6666666666667	1.8258	1.6236	1.2917	1.0813	1.2642	1.9193	1.58036666666667	1.4216	-0.152743735727373	0.782785546251169	1	no	-	--	-	-	-	-
Unigene0000411	9.33333333333333	14.3333333333333	0.6898	0.1079	0.6085	0.5874	0.6005	0.8589	0.468733333333333	0.682266666666667	0.541568338866542	0.492523106706972	1	no	-	--	-	-	-	-
Unigene0000412	4272.33333333333	4415.33333333333	39.0039	33.0728	34.0115	26.5827	40.5939	36.7567	35.3627333333333	34.6444333333333	-0.029606232181736	0.931249352552097	1	no	ankrd13c	PREDICTED: ankyrin repeat domain-containing protein 13C [Sinocyclocheilus anshuiensis]	-	GO:0043226//organelle;GO:0043231//intracellular membrane-bounded organelle;GO:0043229//intracellular organelle;GO:0044424//intracellular part;GO:0044464//cell part;GO:0042175//nuclear outer membrane-endoplasmic reticulum membrane network;GO:0016020//membrane;GO:0005622//intracellular;GO:0005623//cell;GO:0043227//membrane-bounded organelle;GO:0012505//endomembrane system	-	-
Unigene0000413	26.6666666666667	45.3333333333333	0.8309	1.0610	0.4275	0.8381	1.5649	1.3213	0.773133333333333	1.24143333333333	0.683217643309648	0.248208417589836	1	no	FRAS1	PREDICTED: extracellular matrix protein FRAS1-like [Sinocyclocheilus rhinocerous]	-	-	-	GO:0009790//embryo development;GO:0048598//embryonic morphogenesis;GO:0009987//cellular process;GO:0043062//extracellular structure organization;GO:0048736//appendage development;GO:0032501//multicellular organismal process;GO:0044707//single-multicellular organism process;GO:0016043//cellular component organization;GO:0030198//extracellular matrix organization;GO:0033333//fin development;GO:0009…
Unigene0000414	27.6666666666667	26.6666666666667	0.9728	0.9069	1.2235	1.6188	0.6786	0.4628	1.0344	0.920066666666667	-0.168983874647222	0.817856860624816	1	no	-	--	-	-	-	-
Unigene0000415	15.6666666666667	19.6666666666667	0.6623	1.1598	0.3635	0.6073	0.2935	1.5393	0.728533333333333	0.813366666666667	0.158910884681877	0.851100717521591	1	no	-	PREDICTED: protocadherin Fat 2-like [Sinocyclocheilus grahami]	-	-	-	-
Unigene0000416	41.6666666666667	59	0.4747	1.3313	0.1679	1.2514	0.8381	0.4627	0.657966666666667	0.850733333333333	0.370692485459388	0.60071112125367	1	no	-	--	-	-	-	-
Unigene0000417	8	9	0.2428	0.4650	0.8120	0.5566	0.4035	0.6125	0.5066	0.5242	0.0492702766159162	0.999999999999995	1	no	-	--	-	-	-	-
Unigene0000418	31.6666666666667	27.3333333333333	0.9277	1.0153	0.8390	0.9796	0.3114	0.8769	0.927333333333333	0.722633333333333	-0.359824209697334	0.578018929030547	1	no	Gtf2ird2	general transcription factor II-I repeat domain-containing protein 2B-like [Alligator mississippiensis]	-	-	-	-
Unigene0000419	15	27.3333333333333	0.3956	0.5773	0.5768	0.6651	0.8036	1.1494	0.516566666666667	0.8727	0.756531245817763	0.221616697628618	1	no	-	--	-	-	-	-
Unigene0000420	1175	1345	13.7589	12.6118	10.8438	15.6635	12.6423	11.4760	12.4048333333333	13.2606	0.096243702438632	0.790683480797776	1	no	ZDHHC6	PREDICTED: palmitoyltransferase ZDHHC6 [Sinocyclocheilus grahami]	-	GO:0016020//membrane;GO:0031224//intrinsic component of membrane;GO:0044425//membrane part	GO:0016740//transferase activity;GO:0046914//transition metal ion binding;GO:0005488//binding;GO:0003824//catalytic activity;GO:0016746//transferase activity, transferring acyl groups;GO:0043169//cation binding;GO:0016409//palmitoyltransferase activity;GO:0016747//transferase activity, transferring acyl groups other than amino-acyl groups;GO:0046872//metal ion binding;GO:0043167//ion binding	-
Unigene0000421	9	17.6666666666667	0.5153	0.2820	0.6363	0.8033	1.1988	0.7091	0.477866666666667	0.903733333333333	0.919288999426389	0.1971256142962	1	no	-	--	-	-	-	-
Unigene0000422	823.333333333333	903.333333333333	14.5842	14.5231	10.6473	14.9334	13.9641	11.9469	13.2515333333333	13.6148	0.0390164860920795	0.917744797980932	1	no	BMS1	ribosome biogenesis protein BMS1 homolog [Danio rerio]	ko03008//Ribosome biogenesis in eukaryotes//Translation//Genetic Information Processing	GO:0044424//intracellular part;GO:0005622//intracellular;GO:0043227//membrane-bounded organelle;GO:0043226//organelle;GO:0005623//cell;GO:0044464//cell part;GO:0043231//intracellular membrane-bounded organelle;GO:0043229//intracellular organelle	GO:0001883//purine nucleoside binding;GO:0003824//catalytic activity;GO:0005488//binding;GO:1901363//heterocyclic compound binding;GO:0032550//purine ribonucleoside binding;GO:0016818//hydrolase activity, acting on acid anhydrides, in phosphorus-containing anhydrides;GO:0032549//ribonucleoside binding;GO:0016462//pyrophosphatase activity;GO:0097159//organic cyclic compound binding;GO:0036094//sma…	GO:0044085//cellular component biogenesis;GO:0022613//ribonucleoprotein complex biogenesis;GO:0044767//single-organism developmental process;GO:0071840//cellular component organization or biogenesis;GO:0044699//single-organism process;GO:0042254//ribosome biogenesis;GO:0032502//developmental process
Unigene0000423	9.33333333333333	8	0.4778	0.3922	0.8605	0.4382	0.5955	0.3836	0.576833333333333	0.472433333333333	-0.288043775553196	0.697708742394377	1	no	-	--	-	-	-	-
Unigene0000424	1171.33333333333	1323	5.5286	6.0508	6.6486	5.9381	6.3403	6.9609	6.076	6.4131	0.0779000335744877	0.826852577081379	1	no	FBXO30	PREDICTED: F-box only protein 30-like [Sinocyclocheilus rhinocerous]	-	-	GO:0043169//cation binding;GO:0016740//transferase activity;GO:0043167//ion binding;GO:0005488//binding;GO:0003824//catalytic activity;GO:0046914//transition metal ion binding;GO:0046872//metal ion binding;GO:0019787//ubiquitin-like protein transferase activity	GO:0070647//protein modification by small protein conjugation or removal;GO:0044260//cellular macromolecule metabolic process;GO:0043412//macromolecule modification;GO:0044237//cellular metabolic process;GO:0044238//primary metabolic process;GO:0044267//cellular protein metabolic process;GO:0019538//protein metabolic process;GO:0009987//cellular process;GO:0043170//macromolecule metabolic process…
Unigene0000425	4.66666666666667	18.3333333333333	0.1155	0.4424	0.2971	0.0529	1.8550	1.3243	0.285	1.0774	1.91852014589963	0.0643521654504226	1	no	VWA1	PREDICTED: von Willebrand factor A domain-containing protein 1 [Ictalurus punctatus]	-	-	-	-
Unigene0000426	1017	1264.66666666667	6.5401	7.2695	5.2729	6.8609	7.9367	7.4477	6.36083333333333	7.4151	0.221250363493306	0.541434075280898	1	no	Wdr6	PREDICTED: WD repeat-containing protein 6-like [Sinocyclocheilus rhinocerous]	-	-	-	-
Unigene0000427	0	0	0.0000	0.0000	0.0000	0.0000	0.0000	0.0000	0.001	0.001	0	notest	notest	notest	-	--	-	-	-	-
Unigene0000428	76.6666666666667	60	1.0386	2.1525	2.1376	1.8237	1.9830	0.1825	1.77623333333333	1.32973333333333	-0.417684157944978	0.557608845808437	1	no	-	--	-	-	-	-
Unigene0000429	5	212.333333333333	0.0540	0.1773	0.1945	13.6667	1.2264	1.0899	0.141933333333333	5.32766666666667	5.23021846670521	3.23854324043056e-07	0.00145207219319569	yes	-	PREDICTED: sorting nexin-10A-like [Cyprinus carpio]	-	-	-	-
Unigene0000430	2880.33333333333	3169	21.4410	22.5669	18.1202	22.6115	20.7929	20.3863	20.7093666666667	21.2635666666667	0.0381001753637707	0.909765053172588	1	no	PISD	PREDICTED: phosphatidylserine decarboxylase proenzyme, mitochondrial isoform X4 [Sinocyclocheilus grahami]	ko01100//Metabolic pathways//Global and Overview//Metabolism;ko01110//Biosynthesis of secondary metabolites//Global and Overview//Metabolism;ko00564//Glycerophospholipid metabolism//Lipid metabolism//Metabolism	-	GO:0016829//lyase activity;GO:0016831//carboxy-lyase activity;GO:0003824//catalytic activity;GO:0016830//carbon-carbon lyase activity	GO:0008152//metabolic process;GO:0044710//single-organism metabolic process;GO:0044699//single-organism process;GO:0044763//single-organism cellular process;GO:0006793//phosphorus metabolic process;GO:0044255//cellular lipid metabolic process;GO:0019637//organophosphate metabolic process;GO:0006629//lipid metabolic process;GO:0006796//phosphate-containing compound metabolic process;GO:0044237//ce…
Unigene0000431	1335.33333333333	2273.33333333333	20.3293	23.9423	10.6016	50.7561	17.6429	16.6184	18.2910666666667	28.3391333333333	0.631656428342625	0.192214275390314	1	no	Tpm4	PREDICTED: tropomyosin alpha-4 chain isoform X3 [Sinocyclocheilus grahami]	ko04261//Adrenergic signaling in cardiomyocytes//Circulatory system//Organismal Systems;ko04260//Cardiac muscle contraction//Circulatory system//Organismal Systems	-	-	GO:0044699//single-organism process;GO:0030036//actin cytoskeleton organization;GO:0032501//multicellular organismal process;GO:0007010//cytoskeleton organization;GO:0006996//organelle organization;GO:1902589//single-organism organelle organization;GO:0048468//cell development;GO:0070925//organelle assembly;GO:0022607//cellular component assembly;GO:0055001//muscle cell development;GO:0044085//ce…
Unigene0000432	19312	19761.6666666667	151.0043	156.1774	134.0722	101.4512	178.7791	148.4850	147.084633333333	142.9051	-0.0415891246239701	0.903736071937918	1	no	mcm4	PREDICTED: DNA replication licensing factor mcm4 [Sinocyclocheilus rhinocerous]	ko04110//Cell cycle//Cell growth and death//Cellular Processes;ko03030//DNA replication//Replication and repair//Genetic Information Processing	GO:0032991//macromolecular complex;GO:0043234//protein complex	GO:0016787//hydrolase activity;GO:0032549//ribonucleoside binding;GO:0005488//binding;GO:0001882//nucleoside binding;GO:1901363//heterocyclic compound binding;GO:0032550//purine ribonucleoside binding;GO:0097159//organic cyclic compound binding;GO:0001883//purine nucleoside binding;GO:0016818//hydrolase activity, acting on acid anhydrides, in phosphorus-containing anhydrides;GO:0003676//nucleic a…	GO:0051704//multi-organism process;GO:0050896//response to stimulus;GO:0006996//organelle organization;GO:0009607//response to biotic stimulus;GO:0051707//response to other organism;GO:0032392//DNA geometric change;GO:0016043//cellular component organization;GO:0009620//response to fungus;GO:0051276//chromosome organization;GO:0009987//cellular process;GO:0043207//response to external biotic stim…
Unigene0000433	3	16.3333333333333	0.0000	0.4675	0.1256	0.7834	0.2704	1.7356	0.1977	0.9298	2.23360755478976	0.0344397335037184	1	no	-	PREDICTED: trichohyalin-like isoform X1 [Sinocyclocheilus grahami]	-	-	-	-
Unigene0000434	688.333333333333	836	5.7218	6.1481	5.3843	5.1070	8.0193	6.7145	5.7514	6.6136	0.201522613724519	0.594767876741235	1	no	ATXN7L2	PREDICTED: ataxin-7-like protein 2 [Sinocyclocheilus anshuiensis]	-	-	-	-
Unigene0000435	0.666666666666667	0.333333333333333	0.0000	0.1287	0.0000	0.0000	0.0651	0.0000	0.0429	0.0217	-0.983282605055066	1	1	no	-	--	-	-	-	-
Unigene0000436	16	18	0.6220	1.2935	1.2162	0.9126	1.3094	1.0843	1.0439	1.1021	0.0782716179259588	0.927654103790116	1	no	-	--	-	-	-	-
Unigene0000437	86.6666666666667	65.6666666666667	4.7040	3.2892	3.7202	3.1552	2.8469	2.3576	3.90446666666667	2.78656666666667	-0.486636826592199	0.312441748551088	1	no	-	--	-	-	-	-
Unigene0000438	38.6666666666667	50.6666666666667	1.2110	0.9467	1.3055	1.3484	0.7666	2.0368	1.1544	1.38393333333333	0.26163124237831	0.646699897207047	1	no	Slc12a5	PREDICTED: solute carrier family 12 member 5-like [Sinocyclocheilus rhinocerous]	-	-	-	-
Unigene0000439	387.666666666667	321.333333333333	33.0959	24.0060	21.0356	22.9693	19.9863	17.8606	26.0458333333333	20.2720666666667	-0.361559422640554	0.376409071209338	1	no	-	--	-	-	-	-
Unigene0000440	325	321.666666666667	4.5801	2.4626	1.8944	2.4873	2.8573	3.0189	2.97903333333333	2.78783333333333	-0.0956999521375995	0.832580951960602	1	no	-	PREDICTED: uncharacterized protein LOC107572457 [Sinocyclocheilus grahami]	-	-	-	-
Unigene0000441	1990	2139.66666666667	15.2435	13.9202	13.0323	11.1574	16.2317	15.4706	14.0653333333333	14.2865666666667	0.0225155076810739	0.949459532231906	1	no	GABPA	PREDICTED: GA-binding protein alpha chain-like isoform X1 [Sinocyclocheilus grahami]	-	-	-	-
Unigene0000442	90.3333333333333	74.3333333333333	2.3027	1.6963	2.2102	1.2994	1.7171	1.8079	2.06973333333333	1.60813333333333	-0.364057873306717	0.451025127068739	1	no	-	PREDICTED: zinc finger MYM-type protein 4-like [Cyprinus carpio]	-	-	-	-
Unigene0000443	7.66666666666667	13.6666666666667	0.5016	0.4270	0.4015	1.0222	0.3087	0.8182	0.443366666666667	0.716366666666667	0.692197899563433	0.389468068881873	1	no	-	--	-	-	-	-
Unigene0000444	176	283.333333333333	1.3413	2.3333	1.2523	4.0564	1.9091	1.2876	1.6423	2.4177	0.55791754983791	0.278995611542038	1	no	-	--	-	-	-	-
Unigene0000445	10	18.3333333333333	0.5313	0.1342	0.5888	0.4872	0.6791	1.0123	0.4181	0.7262	0.79651888675607	0.297115329945318	1	no	-	--	-	-	-	-
Unigene0000446	27.6666666666667	33.6666666666667	0.8233	1.8473	0.9320	2.1894	1.1858	0.6420	1.20086666666667	1.33906666666667	0.157151812176065	0.823341522923044	1	no	-	--	-	-	-	-
Unigene0000447	224	247	1.8889	2.4090	1.1887	1.4815	2.2223	1.9835	1.82886666666667	1.89576666666667	0.0518315070630113	0.909273840083153	1	no	LOXL3	PREDICTED: lysyl oxidase homolog 3-like isoform X1 [Sinocyclocheilus rhinocerous]	-	-	GO:0046914//transition metal ion binding;GO:0043169//cation binding;GO:0038024//cargo receptor activity;GO:0046872//metal ion binding;GO:0005488//binding;GO:0060089//molecular transducer activity;GO:0043167//ion binding;GO:0004872//receptor activity	GO:0044699//single-organism process;GO:0008152//metabolic process;GO:0044710//single-organism metabolic process
Unigene0000448	19	15.3333333333333	0.6650	0.6947	0.4355	0.2494	0.8037	0.3605	0.5984	0.4712	-0.344770636057176	0.613998279093966	1	no	-	--	-	-	-	-
Unigene0000449	16.6666666666667	30	0.8484	0.3482	0.6184	1.3939	1.0574	0.6486	0.605	1.0333	0.772252127978143	0.227112052326164	1	no	-	--	-	-	-	-
Unigene0000450	14.6666666666667	11.6666666666667	1.3172	0.2746	1.2264	0.6327	0.2085	1.2084	0.9394	0.6832	-0.459431618637297	0.57144906812436	1	no	-	--	-	-	-	-
Unigene0000451	1095.33333333333	945.666666666667	72.8862	69.3362	71.9058	54.3535	52.6038	65.3138	71.3760666666667	57.4237	-0.313794109550291	0.384057925392578	1	no	MP68	PREDICTED: 6.8 kDa mitochondrial proteolipid [Sinocyclocheilus anshuiensis]	-	GO:0044464//cell part;GO:0005623//cell;GO:0044424//intracellular part;GO:0043227//membrane-bounded organelle;GO:0005622//intracellular;GO:0043231//intracellular membrane-bounded organelle;GO:0043229//intracellular organelle;GO:0043226//organelle	-	-
Unigene0000452	19.6666666666667	20.3333333333333	0.9685	1.2588	1.4950	2.3868	0.6706	0.4443	1.24076666666667	1.16723333333333	-0.0881388450421924	0.945402560793295	1	no	-	--	-	-	-	-
Unigene0000453	42.3333333333333	46.6666666666667	1.0768	0.1733	2.8680	0.7260	1.1930	2.3535	1.3727	1.42416666666667	0.0531016284799579	0.955155944527626	1	no	-	--	-	-	-	-
Unigene0000454	343.666666666667	315.666666666667	23.9988	21.8094	20.2521	11.9932	23.7850	21.9039	22.0201	19.2273666666667	-0.195659832429674	0.647472712132424	1	no	-	--	-	-	-	-
Unigene0000455	266	293	1.4897	1.6978	1.9258	1.3209	1.7050	2.2308	1.70443333333333	1.75223333333333	0.0399027304324468	0.927981424291136	1	no	RNF157	PREDICTED: RING finger protein 157-like isoform X1 [Sinocyclocheilus anshuiensis]	-	-	GO:0043169//cation binding;GO:0043167//ion binding;GO:0005488//binding	-
Unigene0000456	20	11	0.7786	0.7866	2.1570	0.6590	0.9289	0.3846	1.24073333333333	0.6575	-0.91613027564629	0.209315517270894	1	no	-	--	-	-	-	-
Unigene0000457	36.3333333333333	21.3333333333333	0.8066	0.1471	2.8015	0.3698	0.5957	1.1100	1.25173333333333	0.691833333333333	-0.855430815032197	0.310730982438175	1	no	-	--	-	-	-	-
Unigene0000458	13.6666666666667	20	0.7165	0.9522	0.5266	1.0324	1.1906	0.7982	0.731766666666667	1.00706666666667	0.460703586432321	0.484356308939899	1	no	-	--	-	-	-	-
Unigene0000459	1184.66666666667	1457.66666666667	9.2572	9.7477	8.0299	9.5404	11.7368	10.0478	9.0116	10.4416666666667	0.212496825961534	0.549709865366783	1	no	cdc37l1	PREDICTED: hsp90 co-chaperone Cdc37-like 1 isoform X3 [Sinocyclocheilus anshuiensis]	-	GO:0044464//cell part;GO:0005623//cell;GO:0005622//intracellular;GO:0044424//intracellular part	-	-
Unigene0000460	60	74.6666666666667	3.2081	3.9162	4.4440	6.4492	2.5972	4.0751	3.8561	4.37383333333333	0.181755781589232	0.738311060636932	1	no	-	--	-	-	-	-
Unigene0000461	2	5.33333333333333	0.0000	0.1076	0.5059	0.7213	0.7626	0.0902	0.2045	0.5247	1.3593919468137	0.300424254598563	1	no	-	--	-	-	-	-
Unigene0000462	6.33333333333333	12.6666666666667	0.2509	0.6865	0.3227	1.3804	0.4864	0.4028	0.420033333333333	0.756533333333333	0.848899826936693	0.320202340086301	1	no	-	--	-	-	-	-
Unigene0000463	35.6666666666667	44	0.7149	2.9340	0.4414	1.2455	2.3759	1.1149	1.36343333333333	1.57876666666667	0.21155380456666	0.774481080876745	1	no	gata3	PREDICTED: trans-acting T-cell-specific transcription factor GATA-3 isoform X5 [Sinocyclocheilus grahami]	-	-	-	-
Unigene0000464	2.66666666666667	2.66666666666667	0.0979	0.0536	0.2519	0.0898	0.1627	0.1347	0.134466666666667	0.129066666666667	-0.0591321313383669	1	1	no	-	--	-	-	-	-
Unigene0000465	7.66666666666667	13	0.6343	0.4860	0.3916	0.9306	0.7730	0.6983	0.503966666666667	0.800633333333333	0.667813367486892	0.358003083113741	1	no	-	--	-	-	-	-
Unigene0000466	27.3333333333333	55.3333333333333	0.6844	0.8989	0.3756	1.2762	1.2890	1.1303	0.652966666666667	1.23183333333333	0.915725822505441	0.0976505162573604	1	no	-	--	-	-	-	-
Unigene0000467	10.3333333333333	14.6666666666667	0.5725	0.7658	0.7200	0.1750	1.0571	1.5173	0.6861	0.916466666666667	0.417663542162137	0.615416477278177	1	no	-	--	-	-	-	-
Unigene0000468	8.33333333333333	12	0.3311	0.3107	0.5842	0.8242	0.1572	0.6076	0.408666666666667	0.529666666666667	0.374160145657737	0.701187405344253	1	no	-	--	-	-	-	-
Unigene0000469	1033.66666666667	977.333333333333	33.3533	24.0523	18.2277	22.2469	23.2246	21.8689	25.2111	22.4468	-0.16754927659052	0.661675881093996	1	no	Zcchc10	PREDICTED: zinc finger CCHC domain-containing protein 10-like [Sinocyclocheilus anshuiensis]	-	-	GO:0005488//binding;GO:0046914//transition metal ion binding;GO:0043167//ion binding;GO:0046872//metal ion binding;GO:0043169//cation binding	-
Unigene0000470	12.6666666666667	18	1.1166	0.8826	0.4469	1.4790	0.7560	0.9675	0.815366666666667	1.0675	0.388715186098564	0.58831942612138	1	no	-	--	-	-	-	-
Unigene0000471	1340	1068.33333333333	24.0289	23.0092	19.4250	17.2217	18.4283	14.2685	22.1543666666667	16.6395	-0.412979002053845	0.251192906412698	1	no	naa20	N-alpha-acetyltransferase 20 [Esox lucius]	-	GO:0044424//intracellular part;GO:0043229//intracellular organelle;GO:0005623//cell;GO:0005622//intracellular;GO:0044464//cell part;GO:0043226//organelle;GO:0043231//intracellular membrane-bounded organelle;GO:0043227//membrane-bounded organelle	GO:0016410//N-acyltransferase activity;GO:0016407//acetyltransferase activity;GO:0016746//transferase activity, transferring acyl groups;GO:0016747//transferase activity, transferring acyl groups other than amino-acyl groups;GO:0034212//peptide N-acetyltransferase activity;GO:0003824//catalytic activity;GO:0016740//transferase activity;GO:0008080//N-acetyltransferase activity	-
Unigene0000472	28.6666666666667	18.3333333333333	1.4343	0.6279	4.2803	1.1179	1.1123	1.5790	2.11416666666667	1.26973333333333	-0.735563576471125	0.320008732427578	1	no	-	--	-	-	-	-
Unigene0000473	3.33333333333333	2.33333333333333	0.4272	0.0000	0.1884	0.0000	0.1352	0.2799	0.2052	0.138366666666667	-0.568534299724599	0.794868367613453	1	no	-	--	-	-	-	-
Unigene0000474	22	33.6666666666667	0.6373	0.5231	0.6558	0.9253	0.5884	1.0476	0.6054	0.853766666666667	0.495953161848022	0.393114651293845	1	no	-	PREDICTED: inositol hexakisphosphate and diphosphoinositol-pentakisphosphate kinase 1-like isoform X3 [Cyprinus carpio]	ko04070//Phosphatidylinositol signaling system//Signal transduction//Environmental Information Processing	-	-	-
Unigene0000475	10.3333333333333	11.6666666666667	0.4431	0.4409	0.4145	0.4063	0.2231	0.7022	0.432833333333333	0.443866666666667	0.0363147615744957	0.999999999999998	1	no	-	--	-	-	-	-
Unigene0000476	234.666666666667	297.333333333333	0.5618	1.7933	1.1273	1.7901	1.3329	0.9363	1.1608	1.3531	0.221149040202095	0.658676988238314	1	no	AIM1	PREDICTED: serine-rich adhesin for platelets-like [Sinocyclocheilus anshuiensis]	-	-	-	-
Unigene0000477	177.666666666667	233	3.7647	3.6434	2.2599	4.0594	4.6920	3.2299	3.22266666666667	3.99376666666667	0.309495074301312	0.485263952844299	1	no	-	Zgc:162945 protein [Danio rerio]	-	-	-	-
Unigene0000478	98.6666666666667	127.333333333333	1.3910	1.3357	1.3099	1.4079	1.7736	1.7216	1.34553333333333	1.63436666666667	0.280553553570329	0.535597150252936	1	no	-	--	-	-	-	-
Unigene0000479	8.66666666666667	8.33333333333333	0.4042	0.0632	1.0695	0.4765	0.3838	0.5297	0.5123	0.463333333333333	-0.144938414677489	0.947099462951808	1	no	-	PREDICTED: transcription factor E2-alpha-like isoform X5 [Sinocyclocheilus grahami]	-	-	-	-
Unigene0000480	32	42	0.4650	1.1251	0.8816	0.2244	1.5999	1.2799	0.8239	1.03473333333333	0.328717863417352	0.641821616636744	1	no	-	--	-	-	-	-
Unigene0000481	5.66666666666667	8	0.3119	0.2048	0.5777	0.3432	0.7602	0.4006	0.3648	0.501333333333333	0.458664431679101	0.590823397848607	1	no	-	--	-	-	-	-
Unigene0000482	416.333333333333	696.666666666667	2.2347	3.5380	2.2429	4.0534	4.6055	3.8700	2.67186666666667	4.1763	0.644377334825101	0.102118516878907	1	no	TRIM35	PREDICTED: zinc-binding protein A33-like [Sinocyclocheilus rhinocerous]	-	-	-	-
Unigene0000483	166.666666666667	184.333333333333	2.5938	1.9031	2.9972	1.7008	3.0501	3.1241	2.49803333333333	2.625	0.0715246946263892	0.881221168473533	1	no	MYH6	PREDICTED: LOW QUALITY PROTEIN: myosin-7-like [Cyprinus carpio]	ko04530//Tight junction//Cellular commiunity//Cellular Processes	GO:0044464//cell part;GO:0044424//intracellular part;GO:0043228//non-membrane-bounded organelle;GO:0005856//cytoskeleton;GO:0043232//intracellular non-membrane-bounded organelle;GO:0043229//intracellular organelle;GO:0005622//intracellular;GO:0005623//cell;GO:0043226//organelle;GO:0015629//actin cytoskeleton	GO:0005488//binding;GO:0097159//organic cyclic compound binding;GO:0016787//hydrolase activity;GO:1901363//heterocyclic compound binding;GO:0097367//carbohydrate derivative binding;GO:0032549//ribonucleoside binding;GO:0016817//hydrolase activity, acting on acid anhydrides;GO:0005515//protein binding;GO:0003824//catalytic activity;GO:0036094//small molecule binding;GO:0032550//purine ribonucleosi…	GO:0048646//anatomical structure formation involved in morphogenesis;GO:0044763//single-organism cellular process;GO:0071840//cellular component organization or biogenesis;GO:0006936//muscle contraction;GO:0009653//anatomical structure morphogenesis;GO:0003012//muscle system process;GO:0022607//cellular component assembly;GO:0050879//multicellular organismal movement;GO:0044707//single-multicellu…
Unigene0000484	9	18	0.4094	0.7682	0.4815	0.4827	1.2311	1.3951	0.553033333333333	1.0363	0.906003366704399	0.202683388312319	1	no	-	--	-	-	-	-
Unigene0000485	0	0	0.0000	0.0000	0.0000	0.0000	0.0000	0.0000	0.001	0.001	0	notest	notest	notest	-	--	-	-	-	-
Unigene0000486	3401.33333333333	3128	55.7177	55.7275	45.8267	39.7078	51.8632	44.8648	52.4239666666667	45.4786	-0.205038676106581	0.54481821210291	1	no	Haus7	PREDICTED: HAUS augmin-like complex subunit 7 [Sinocyclocheilus rhinocerous]	-	-	-	-
Unigene0000487	366.666666666667	329	24.8073	21.0912	14.9005	16.7922	17.2800	17.0935	20.2663333333333	17.0552333333333	-0.248870601560485	0.542305822372419	1	no	-	--	-	-	-	-
Unigene0000488	110.333333333333	429.333333333333	2.1355	2.0033	2.4134	17.1343	3.8022	2.2390	2.18406666666667	7.72516666666667	1.82254916489204	0.00500105646334926	0.546453783152401	no	RGS16	PREDICTED: regulator of G-protein signaling 16-like [Cyprinus carpio]	-	-	-	GO:0065007//biological regulation;GO:0009966//regulation of signal transduction;GO:0045744//negative regulation of G-protein coupled receptor protein signaling pathway;GO:0010646//regulation of cell communication;GO:0048523//negative regulation of cellular process;GO:0009968//negative regulation of signal transduction;GO:0010648//negative regulation of cell communication;GO:0048583//regulation of…
Unigene0000489	994.333333333333	1154.33333333333	7.5627	13.4386	5.6663	15.4826	6.4579	6.1586	8.8892	9.36636666666667	0.0754359296700893	0.873234893426019	1	no	galc	PREDICTED: galactocerebrosidase-like [Sinocyclocheilus grahami]	ko01100//Metabolic pathways//Global and Overview//Metabolism;ko04142//Lysosome//Transport and catabolism//Cellular Processes;ko00600//Sphingolipid metabolism//Lipid metabolism//Metabolism	GO:0044444//cytoplasmic part;GO:0005737//cytoplasm;GO:0044464//cell part;GO:0000323//lytic vacuole;GO:0044424//intracellular part;GO:0043226//organelle;GO:0005773//vacuole;GO:0043227//membrane-bounded organelle;GO:0005622//intracellular;GO:0043229//intracellular organelle;GO:0043231//intracellular membrane-bounded organelle;GO:0005623//cell	GO:0003824//catalytic activity;GO:0016787//hydrolase activity;GO:0016798//hydrolase activity, acting on glycosyl bonds;GO:0004553//hydrolase activity, hydrolyzing O-glycosyl compounds	GO:0006687//glycosphingolipid metabolic process;GO:0008152//metabolic process;GO:0006643//membrane lipid metabolic process;GO:1901564//organonitrogen compound metabolic process;GO:0044238//primary metabolic process;GO:0006665//sphingolipid metabolic process;GO:0019374//galactolipid metabolic process;GO:0044255//cellular lipid metabolic process;GO:0044237//cellular metabolic process;GO:1903509//li…
Unigene0000490	8	11.6666666666667	0.6731	0.5358	0.3148	1.0100	0.7457	0.3368	0.5079	0.6975	0.457648742987114	0.589345766028504	1	no	-	--	-	-	-	-
Unigene0000491	148	179.333333333333	2.5652	3.1273	1.8378	2.7839	3.1656	2.6065	2.5101	2.852	0.184229140860626	0.681210985406342	1	no	Kazald1	PREDICTED: kazal-type serine protease inhibitor domain-containing protein 1 [Sinocyclocheilus anshuiensis]	-	-	-	GO:0040007//growth;GO:0016049//cell growth;GO:0044763//single-organism cellular process;GO:0009987//cellular process;GO:0044699//single-organism process
Unigene0000492	14.3333333333333	21.6666666666667	0.7410	0.7209	0.3813	0.8682	1.0946	0.6798	0.6144	0.880866666666667	0.519745444520911	0.404089407005165	1	no	-	hypothetical protein cypCar_00035167 [Cyprinus carpio]	-	-	-	-
Unigene0000493	5.33333333333333	20.6666666666667	0.1176	0.6435	0.2420	2.3182	0.3257	0.7551	0.334366666666667	1.133	1.76064492510928	0.0524141433929911	1	no	-	--	-	-	-	-
Unigene0000494	45.3333333333333	32.3333333333333	0.8395	0.5044	0.9655	0.3019	0.7659	0.5285	0.7698	0.5321	-0.532786267627881	0.362896020804528	1	no	tc1a	transposase [Acipenser fulvescens]	-	-	-	-
Unigene0000495	114	136.666666666667	1.9057	1.4569	1.6006	2.6598	1.3816	1.4655	1.6544	1.83563333333333	0.149969819287606	0.756031178203246	1	no	-	gag-like protein [Danio rerio]	ko01100//Metabolic pathways//Global and Overview//Metabolism;ko01110//Biosynthesis of secondary metabolites//Global and Overview//Metabolism;ko01130//Biosynthesis of antibiotics//Global and Overview//Metabolism;ko00480//Glutathione metabolism//Metabolism of other amino acids//Metabolism;ko00330//Arginine and proline metabolism//Amino acid metabolism//Metabolism	-	-	-
Unigene0000496	6	27.3333333333333	0.2582	0.4522	0.2657	2.2259	0.8583	0.9476	0.325366666666667	1.34393333333333	2.04632321236533	0.00501434655525754	0.547083278895914	no	NLRC3	PREDICTED: NACHT, LRR and PYD domains-containing protein 12-like, partial [Sinocyclocheilus grahami]	ko04621//NOD-like receptor signaling pathway//Immune system//Organismal Systems	-	-	-
Unigene0000497	1286.66666666667	774.666666666667	5.3433	3.7494	3.1043	2.0327	2.4828	2.4202	4.06566666666667	2.3119	-0.814412941068895	0.0334514534965519	1	no	ptprf	PREDICTED: receptor-type tyrosine-protein phosphatase F-like isoform X2 [Sinocyclocheilus rhinocerous]	ko04514//Cell adhesion molecules (CAMs)//Signaling molecules and interaction//Environmental Information Processing;ko04910//Insulin signaling pathway//Endocrine system//Organismal Systems;ko04520//Adherens junction//Cellular commiunity//Cellular Processes	-	-	-
Unigene0000498	6.66666666666667	14	0.0733	0.5619	0.1510	0.3363	0.2844	0.8412	0.262066666666667	0.4873	0.894876359489376	0.302233479223996	1	no	ARL3	PREDICTED: ADP-ribosylation factor-like protein 3 [Poecilia formosa]	-	GO:0044464//cell part;GO:0005623//cell	GO:0032549//ribonucleoside binding;GO:0097159//organic cyclic compound binding;GO:0005488//binding;GO:0032550//purine ribonucleoside binding;GO:0001883//purine nucleoside binding;GO:0097367//carbohydrate derivative binding;GO:1901363//heterocyclic compound binding;GO:0036094//small molecule binding;GO:0001882//nucleoside binding	GO:0023052//signaling;GO:0007154//cell communication;GO:0048638//regulation of developmental growth;GO:0045664//regulation of neuron differentiation;GO:0044700//single organism signaling;GO:0022604//regulation of cell morphogenesis;GO:0007165//signal transduction;GO:0022603//regulation of anatomical structure morphogenesis;GO:0044767//single-organism developmental process;GO:0065008//regulation o…
Unigene0000499	6	11.3333333333333	0.1841	0.6044	0.3788	0.7877	0.6118	0.6192	0.3891	0.6729	0.790251140834573	0.313472678356675	1	no	-	--	-	-	-	-
Unigene0000500	4.66666666666667	9.33333333333333	0.0000	0.4368	0.4107	0.5227	0.3789	0.6276	0.2825	0.509733333333333	0.851491831923579	0.387012426106955	1	no	-	--	-	-	-	-
Unigene0000501	10.6666666666667	9.33333333333333	0.3172	1.0992	0.3808	1.1633	0.0586	0.1455	0.599066666666667	0.4558	-0.394315636536986	0.728991104372444	1	no	-	--	-	-	-	-
Unigene0000502	9.33333333333333	11.6666666666667	0.9080	0.3975	0.4360	0.8326	0.8718	0.3887	0.5805	0.6977	0.265310766551319	0.796576436322639	1	no	-	--	-	-	-	-
Unigene0000503	20.6666666666667	17.6666666666667	0.8024	1.4271	1.0322	1.4256	0.8334	0.3221	1.08723333333333	0.860366666666667	-0.337638056904718	0.651616716003017	1	no	-	--	-	-	-	-
Unigene0000504	2	2.66666666666667	0.1962	0.0537	0.0505	0.1350	0.1087	0.1350	0.100133333333333	0.126233333333333	0.334170608370148	0.845516268270503	1	no	-	--	-	-	-	-
Unigene0000505	0.333333333333333	7	0.0000	0.0000	0.0530	0.9450	0.0000	0.0473	0.0176666666666667	0.330766666666667	4.22671208876785	0.0480560847747019	1	no	-	--	-	-	-	-
Unigene0000506	713.333333333333	725	16.6336	21.6068	14.8216	18.6033	18.2435	13.6274	17.6873333333333	16.8247333333333	-0.0721329148211807	0.851895220137089	1	no	fam213b	PREDICTED: prostamide/prostaglandin F synthase [Sinocyclocheilus anshuiensis]	ko01100//Metabolic pathways//Global and Overview//Metabolism;ko00590//Arachidonic acid metabolism//Lipid metabolism//Metabolism	GO:0044444//cytoplasmic part;GO:0044424//intracellular part;GO:0005737//cytoplasm;GO:0005623//cell;GO:0005622//intracellular;GO:0044464//cell part	GO:0003824//catalytic activity;GO:0016491//oxidoreductase activity;GO:0016614//oxidoreductase activity, acting on CH-OH group of donors	GO:0006631//fatty acid metabolic process;GO:0044237//cellular metabolic process;GO:0006629//lipid metabolic process;GO:0071704//organic substance metabolic process;GO:0009987//cellular process;GO:0044238//primary metabolic process;GO:0044710//single-organism metabolic process;GO:0006690//icosanoid metabolic process;GO:0043436//oxoacid metabolic process;GO:0032787//monocarboxylic acid metabolic pr…
Unigene0000507	704.666666666667	774.666666666667	11.1976	12.1880	10.4783	11.9040	11.1273	11.6699	11.2879666666667	11.5670666666667	0.0352374199111088	0.924433515006004	1	no	RNF25	PREDICTED: E3 ubiquitin-protein ligase RNF25-like isoform X1 [Sinocyclocheilus rhinocerous]	-	-	GO:0043167//ion binding;GO:0043169//cation binding;GO:0005488//binding	-
Unigene0000508	8276.33333333333	7765.66666666667	52.6301	43.4464	42.1092	37.6704	43.2646	41.1845	46.0619	40.7065	-0.17831473991994	0.585484182169607	1	no	ncapg2	PREDICTED: condensin-2 complex subunit G2 [Cyprinus carpio]	-	-	-	-
Unigene0000509	11	16	0.3791	0.4426	0.0520	0.1854	0.6720	0.3710	0.291233333333333	0.409466666666667	0.491570521844102	0.562995841897998	1	no	-	--	-	-	-	-
Unigene0000510	216.666666666667	275.666666666667	2.2306	3.1039	1.8910	2.9317	3.0831	2.5726	2.4085	2.86246666666667	0.249123969244624	0.559620266374462	1	no	c1galt1a	PREDICTED: glycoprotein-N-acetylgalactosamine 3-beta-galactosyltransferase 1-A-like [Sinocyclocheilus rhinocerous]	ko01100//Metabolic pathways//Global and Overview//Metabolism;ko00512//Mucin type O-glycan biosynthesis//Glycan biosynthesis and metabolism//Metabolism	GO:0016020//membrane;GO:0031224//intrinsic component of membrane;GO:0044425//membrane part	GO:0048531//beta-1,3-galactosyltransferase activity;GO:0016758//transferase activity, transferring hexosyl groups;GO:0043167//ion binding;GO:0016740//transferase activity;GO:0008378//galactosyltransferase activity;GO:0003824//catalytic activity;GO:0043169//cation binding;GO:0005488//binding;GO:0016757//transferase activity, transferring glycosyl groups	GO:0044767//single-organism developmental process;GO:0044763//single-organism cellular process;GO:0006493//protein O-linked glycosylation;GO:0006464//cellular protein modification process;GO:0009059//macromolecule biosynthetic process;GO:0044237//cellular metabolic process;GO:0071704//organic substance metabolic process;GO:0008152//metabolic process;GO:0019538//protein metabolic process;GO:000910…
Unigene0000511	7.66666666666667	26.3333333333333	0.3395	0.5367	0.0388	1.6602	0.5432	0.6229	0.305	0.9421	1.6270709613738	0.0473080083877061	1	no	-	--	-	-	-	-
Unigene0000512	1991.66666666667	2160.66666666667	21.4971	14.9478	29.2256	12.1336	22.5076	32.4763	21.8901666666667	22.3725	0.031443539487201	0.941815203782256	1	no	fbxo43	PREDICTED: F-box only protein 43-like [Sinocyclocheilus rhinocerous]	ko04114//Oocyte meiosis//Cell growth and death//Cellular Processes	-	-	-
Unigene0000513	5.66666666666667	11	0.0988	0.4864	0.3049	0.5434	0.6018	0.4530	0.2967	0.532733333333333	0.844408626898912	0.312806163655789	1	no	-	--	-	-	-	-
Unigene0000514	5.66666666666667	7	0.6203	0.0000	0.4469	0.1138	0.6872	0.5122	0.355733333333333	0.437733333333333	0.299256083388396	0.822982208409285	1	no	-	--	-	-	-	-
Unigene0000515	51.3333333333333	76.6666666666667	3.2839	1.7329	4.2845	7.3130	1.8840	3.4969	3.10043333333333	4.2313	0.448631108227384	0.460650469129043	1	no	-	--	-	-	-	-
Unigene0000516	51	46	2.0686	3.2990	4.0750	3.4685	2.4227	2.0062	3.14753333333333	2.63246666666667	-0.257806393211697	0.655811772337008	1	no	-	--	-	-	-	-
Unigene0000517	14.3333333333333	6.66666666666667	0.8083	1.2639	0.5348	0.2118	0.1279	0.7416	0.869	0.360433333333333	-1.26962373744504	0.135004300643851	1	no	-	--	-	-	-	-
Unigene0000518	2471.33333333333	2823	18.4817	23.9090	16.1717	20.7734	23.4228	18.5506	19.5208	20.9156	0.099567206231807	0.775613009631089	1	no	Spg7	PREDICTED: paraplegin-like isoform X3 [Sinocyclocheilus anshuiensis]	-	GO:0044425//membrane part;GO:0031224//intrinsic component of membrane;GO:0016020//membrane	GO:0032549//ribonucleoside binding;GO:0008233//peptidase activity;GO:0097367//carbohydrate derivative binding;GO:0036094//small molecule binding;GO:0001883//purine nucleoside binding;GO:0046914//transition metal ion binding;GO:0001882//nucleoside binding;GO:0097159//organic cyclic compound binding;GO:0003824//catalytic activity;GO:0043169//cation binding;GO:0043167//ion binding;GO:0004175//endope…	GO:0051604//protein maturation;GO:0016485//protein processing;GO:0019538//protein metabolic process;GO:0006508//proteolysis;GO:0008152//metabolic process;GO:0044238//primary metabolic process;GO:0043170//macromolecule metabolic process;GO:0071704//organic substance metabolic process;GO:0010467//gene expression
Unigene0000519	347	583.333333333333	35.3498	20.0329	12.1688	52.5443	24.6681	27.9874	22.5171666666667	35.0666	0.63907225139415	0.188373225690907	1	no	S100A4	PREDICTED: ictacalcin-like isoform X1 [Sinocyclocheilus anshuiensis]	-	-	GO:0005488//binding;GO:0046872//metal ion binding;GO:0043167//ion binding;GO:0043169//cation binding	-
Unigene0000520	23	26.6666666666667	2.2086	0.6831	0.4941	0.5283	1.4362	1.8060	1.1286	1.25683333333333	0.155259094255585	0.84861463803551	1	no	-	--	-	-	-	-
Unigene0000521	15	16	0.3838	0.8402	0.7900	1.0950	0.2835	0.5478	0.671333333333333	0.6421	-0.0642312788092548	0.964034194591166	1	no	-	--	-	-	-	-
Unigene0000522	32	61	2.1969	2.2040	1.6955	6.0435	2.2310	2.3514	2.03213333333333	3.54196666666667	0.801555570964179	0.169371762870226	1	no	-	--	-	-	-	-
Unigene0000523	53.3333333333333	107.666666666667	0.5106	0.6455	0.3171	1.4288	0.4876	0.7753	0.491066666666667	0.897233333333333	0.869564322816948	0.118343715117661	1	no	-	--	-	-	-	-
Unigene0000524	46.3333333333333	42.6666666666667	2.5386	3.0356	1.2578	2.5434	2.1353	1.2076	2.27733333333333	1.9621	-0.214946902696596	0.717772030753712	1	no	-	--	-	-	-	-
Unigene0000525	899.666666666667	1440	6.6027	14.2039	5.1099	11.5752	15.6069	11.5392	8.63883333333333	12.9071	0.579256492680522	0.184861901660057	1	no	MSI1	PREDICTED: RNA-binding protein Musashi homolog 1-like [Danio rerio]	ko03015//mRNA surveillance pathway//Translation//Genetic Information Processing	-	GO:0005488//binding;GO:0097159//organic cyclic compound binding	GO:0007275//multicellular organism development;GO:0044699//single-organism process;GO:0048731//system development;GO:0032502//developmental process;GO:0007399//nervous system development;GO:0032501//multicellular organismal process;GO:0048856//anatomical structure development;GO:0044707//single-multicellular organism process;GO:0044767//single-organism developmental process
Unigene0000526	9.66666666666667	9.33333333333333	0.9129	0.8881	1.2526	0.9301	1.2361	0.6514	1.01786666666667	0.9392	-0.116044277384355	0.882426440082675	1	no	-	--	-	-	-	-
Unigene0000527	3056.33333333333	2481.33333333333	93.7888	76.9405	92.8042	62.2509	72.5364	67.0391	87.8445	67.2754666666667	-0.38487146763004	0.253959153099777	1	no	DYNLRB1	PREDICTED: dynein light chain roadblock-type 1 isoform X1 [Sinocyclocheilus anshuiensis]	-	GO:0015630//microtubule cytoskeleton;GO:0043228//non-membrane-bounded organelle;GO:0005622//intracellular;GO:0044464//cell part;GO:0044424//intracellular part;GO:0043232//intracellular non-membrane-bounded organelle;GO:0005623//cell;GO:0044446//intracellular organelle part;GO:0044430//cytoskeletal part;GO:0044422//organelle part;GO:0005856//cytoskeleton;GO:0043226//organelle;GO:0005875//microtubu…	-	GO:0009987//cellular process;GO:0044699//single-organism process;GO:0023052//signaling;GO:0007154//cell communication;GO:0050789//regulation of biological process;GO:0044763//single-organism cellular process;GO:0007167//enzyme linked receptor protein signaling pathway;GO:0051716//cellular response to stimulus;GO:0007165//signal transduction;GO:0065007//biological regulation;GO:0050896//response t…
Unigene0000528	298.666666666667	497.666666666667	2.4582	3.8348	2.3220	3.2213	4.8979	5.2846	2.87166666666667	4.46793333333333	0.637719363595528	0.132344027134144	1	no	tbx1	PREDICTED: T-box transcription factor TBX1 isoform X1 [Sinocyclocheilus anshuiensis]	-	GO:0043231//intracellular membrane-bounded organelle;GO:0005622//intracellular;GO:0005623//cell;GO:0043229//intracellular organelle;GO:0044424//intracellular part;GO:0044464//cell part;GO:0043226//organelle;GO:0043227//membrane-bounded organelle	GO:0005488//binding;GO:0003677//DNA binding;GO:0003676//nucleic acid binding;GO:0001071//nucleic acid binding transcription factor activity;GO:0005515//protein binding;GO:1901363//heterocyclic compound binding;GO:0097159//organic cyclic compound binding;GO:0046983//protein dimerization activity	GO:0003143//embryonic heart tube morphogenesis;GO:0009653//anatomical structure morphogenesis;GO:0044260//cellular macromolecule metabolic process;GO:0016070//RNA metabolic process;GO:0008152//metabolic process;GO:0006139//nucleobase-containing compound metabolic process;GO:0034641//cellular nitrogen compound metabolic process;GO:0043170//macromolecule metabolic process;GO:0071704//organic substa…
Unigene0000529	5.33333333333333	3.66666666666667	0.4189	0.1719	0.2694	0.1921	0.2321	0.1441	0.286733333333333	0.189433333333333	-0.598019415893321	0.61131256286983	1	no	-	--	-	-	-	-
Unigene0000530	5.66666666666667	7.66666666666667	0.4366	0.5462	0.1284	0.5148	0.5528	0.3434	0.3704	0.470333333333333	0.344599483503233	0.78504384487074	1	no	-	--	-	-	-	-
Unigene0000531	336	362	21.2735	7.2450	29.9845	11.8288	9.5901	36.5940	19.501	19.3376333333333	-0.0121368673218539	0.985866025589682	1	no	-	--	-	-	-	-
Unigene0000532	9162.33333333333	13442.3333333333	23.6694	43.8198	28.0133	41.3548	55.8235	34.7863	31.8341666666667	43.9882	0.466540568462327	0.204249385794862	1	no	EEF2	PREDICTED: elongation factor 2 [Sinocyclocheilus anshuiensis]	-	-	-	-
Unigene0000533	1195	801.333333333333	5.2944	2.4842	11.6895	4.2982	2.7660	5.0509	6.48936666666667	4.03836666666667	-0.684305777229884	0.179437697566744	1	no	Prss56	PREDICTED: serine protease 56 [Pygocentrus nattereri]	-	-	-	-
Unigene0000534	4609.33333333333	4149.66666666667	49.1614	39.7575	35.6033	31.1361	35.0488	39.0070	41.5074	35.0639666666667	-0.243379352685304	0.47181787964906	1	no	ZNF706	PREDICTED: zinc finger protein 706 isoform X1 [Sinocyclocheilus rhinocerous]	-	-	-	-
Unigene0000535	27.6666666666667	34.6666666666667	1.6051	1.3433	1.1173	0.6926	2.3012	1.9056	1.35523333333333	1.63313333333333	0.269101316392923	0.663375472119317	1	no	-	--	-	-	-	-
Unigene0000536	422.333333333333	428	5.4907	4.0781	2.1937	2.9076	2.9472	5.2017	3.92083333333333	3.6855	-0.089299958698783	0.847587372151091	1	no	CRISPLD1	PREDICTED: cysteine-rich secretory protein LCCL domain-containing 1-like [Sinocyclocheilus anshuiensis]	-	-	-	-
Unigene0000537	45	33.3333333333333	2.5647	3.0315	1.6363	1.0818	2.2731	1.7412	2.41083333333333	1.6987	-0.50510083049618	0.367116175725491	1	no	-	--	-	-	-	-
Unigene0000538	1.66666666666667	6.33333333333333	0.0000	0.1427	0.0895	0.4783	0.2408	0.0798	0.0774	0.2663	1.7826469570662	0.135953493935452	1	no	-	--	-	-	-	-
Unigene0000539	16	16.6666666666667	0.4825	1.2323	0.3310	0.2950	0.9355	0.7747	0.681933333333333	0.6684	-0.0289189730489346	0.999999999999996	1	no	-	--	-	-	-	-
Unigene0000540	3	12.6666666666667	0.1220	0.1336	0.3140	1.6787	0.2704	0.2239	0.189866666666667	0.724333333333333	1.93166712310224	0.0574290395307968	1	no	-	--	-	-	-	-
Unigene0000541	513	457	4.9301	3.5972	7.0363	3.6776	3.3486	5.8512	5.18786666666667	4.29246666666667	-0.27333447040767	0.525263836662632	1	no	ZNF271	PREDICTED: zinc finger protein 239-like isoform X1 [Sinocyclocheilus grahami]	-	-	-	-
Unigene0000542	1165	1447	3.0380	3.3524	2.7294	3.3691	4.0205	3.2742	3.03993333333333	3.5546	0.225647536882857	0.526207115788785	1	no	aasdh	PREDICTED: acyl-CoA synthetase family member 4 isoform X1 [Sinocyclocheilus anshuiensis]	-	-	GO:0097159//organic cyclic compound binding;GO:0032550//purine ribonucleoside binding;GO:0001882//nucleoside binding;GO:1901363//heterocyclic compound binding;GO:0097367//carbohydrate derivative binding;GO:0036094//small molecule binding;GO:0001883//purine nucleoside binding;GO:0032549//ribonucleoside binding;GO:0016877//ligase activity, forming carbon-sulfur bonds;GO:0016874//ligase activity;GO:…	GO:0044281//small molecule metabolic process;GO:0032787//monocarboxylic acid metabolic process;GO:0044699//single-organism process;GO:0044710//single-organism metabolic process;GO:0044238//primary metabolic process;GO:0044763//single-organism cellular process;GO:0006082//organic acid metabolic process;GO:0071704//organic substance metabolic process;GO:0044237//cellular metabolic process;GO:000998…
Unigene0000543	32	42.3333333333333	1.3062	0.4860	0.7796	0.8144	1.9680	0.5992	0.857266666666667	1.1272	0.394927563861839	0.555573720474944	1	no	-	PREDICTED: uncharacterized protein LOC107715642 [Sinocyclocheilus rhinocerous]	-	-	-	-
Unigene0000544	15.6666666666667	19.3333333333333	0.6169	1.4855	0.9523	1.0183	1.0936	1.3584	1.01823333333333	1.15676666666667	0.184029685183319	0.790216145094097	1	no	-	--	-	-	-	-
Unigene0000545	4.66666666666667	6.66666666666667	0.4415	0.1208	0.2272	0.2024	0.5503	0.3544	0.263166666666667	0.369033333333333	0.487774369790548	0.614144984165429	1	no	-	--	-	-	-	-
Unigene0000546	17.3333333333333	38	0.5102	1.0796	0.2800	2.1522	0.5653	0.9362	0.623266666666667	1.2179	0.966474218307843	0.178572692788333	1	no	-	--	-	-	-	-
Unigene0000547	469.666666666667	466	6.7555	3.3139	8.3788	4.5730	5.2572	7.3881	6.1494	5.73943333333333	-0.0995373493193744	0.824932383995135	1	no	-	PREDICTED: dynein light chain 1, cytoplasmic-like [Cyprinus carpio]	-	-	-	-
Unigene0000548	3	2	0.4711	0.0000	0.3878	0.0000	0.2088	0.3458	0.2863	0.184866666666667	-0.631042554681028	0.762487799209898	1	no	-	--	-	-	-	-
Unigene0000549	18	36	1.6427	1.0487	1.1269	1.9456	2.8056	2.5117	1.27276666666667	2.42096666666667	0.927615257999953	0.107521340086402	1	no	-	--	-	-	-	-
Unigene0000550	1099.33333333333	1380.66666666667	4.9031	5.7471	4.8875	5.9132	6.6485	5.7503	5.17923333333333	6.104	0.237016406356723	0.504504019309695	1	no	PLEKHM3	PREDICTED: pleckstrin homology domain-containing family M member 3-like isoform X1 [Sinocyclocheilus rhinocerous]	-	-	-	-
Unigene0000551	106.666666666667	72	3.5185	4.8520	14.9897	7.2915	3.8200	3.4862	7.78673333333333	4.8659	-0.678311548680759	0.274167635078652	1	no	-	--	-	-	-	-
Unigene0000552	1381.66666666667	1462	8.3775	5.1493	8.6637	4.6568	6.1836	11.0932	7.39683333333333	7.3112	-0.016799551445407	0.968771798146959	1	no	AP3B2	PREDICTED: AP-3 complex subunit beta-2 isoform X4 [Sinocyclocheilus rhinocerous]	ko04142//Lysosome//Transport and catabolism//Cellular Processes	GO:0044464//cell part;GO:0030117//membrane coat;GO:0048475//coated membrane;GO:0044425//membrane part;GO:0032991//macromolecular complex;GO:0005623//cell;GO:0044444//cytoplasmic part;GO:0044424//intracellular part;GO:0030119//AP-type membrane coat adaptor complex;GO:0043234//protein complex;GO:0005622//intracellular;GO:0016020//membrane;GO:0005737//cytoplasm;GO:0098796//membrane protein complex	-	GO:0051179//localization;GO:0006810//transport;GO:0051234//establishment of localization
Unigene0000553	4.66666666666667	1.33333333333333	0.0807	0.9717	0.1661	0.1480	0.0894	0.0740	0.406166666666667	0.1038	-1.96826540153167	0.16846595475426	1	no	-	PREDICTED: uncharacterized protein LOC109112128 [Cyprinus carpio]	-	-	-	-
Unigene0000554	209.666666666667	418.333333333333	0.9453	2.6971	1.7211	4.6009	3.2582	2.0014	1.78783333333333	3.28683333333333	0.878486052155238	0.0759832031887255	1	no	pol	PREDICTED: olfactory receptor 52D1-like [Fundulus heteroclitus]	-	-	-	-
Unigene0000555	2695.66666666667	3463.33333333333	19.1359	18.8646	21.3341	22.2155	28.3732	21.5851	19.7782	24.0579333333333	0.282601581508561	0.403651286820372	1	no	-	Uncharacterized protein C3orf30 [Cricetulus griseus]	-	-	-	-
Unigene0000556	11.6666666666667	16.3333333333333	0.8471	0.9271	0.7991	1.4240	0.9384	0.9714	0.857766666666667	1.11126666666667	0.373547898443276	0.574687234207701	1	no	-	PREDICTED: regucalcin isoform X1 [Oreochromis niloticus]	-	-	-	-
Unigene0000557	0	0.666666666666667	0.0000	0.0000	0.0000	0.0000	0.1459	0.0000	0.001	0.0486333333333333	5.60387357230937	0.55830153953954	1	no	-	--	-	-	-	-
Unigene0000558	97.6666666666667	101	2.5782	0.9006	4.7700	1.5342	2.4005	4.1016	2.7496	2.67876666666667	-0.0376528357782152	0.961974528916511	1	no	ccdc176	PREDICTED: basal body-orientation factor 1-like [Cyprinus carpio]	-	-	-	-
Unigene0000559	31	44.3333333333333	2.1736	2.8547	3.3998	3.4281	3.3712	4.3870	2.80936666666667	3.72876666666667	0.408453589851778	0.448087659529707	1	no	-	PREDICTED: RNA-directed DNA polymerase from mobile element jockey-like, partial [Larimichthys crocea]	-	-	-	-
Unigene0000560	992	966.666666666667	8.4352	8.1558	8.5381	6.7736	10.7494	5.9419	8.37636666666667	7.82163333333333	-0.0988546898790343	0.797747459349266	1	no	AKAP17A	PREDICTED: A-kinase anchor protein 17A [Pygocentrus nattereri]	-	GO:0044424//intracellular part;GO:0005623//cell;GO:0044428//nuclear part;GO:0044446//intracellular organelle part;GO:0031974//membrane-enclosed lumen;GO:0016604//nuclear body;GO:0005654//nucleoplasm;GO:0044464//cell part;GO:0005634//nucleus;GO:0070013//intracellular organelle lumen;GO:0043233//organelle lumen;GO:0005622//intracellular;GO:0043231//intracellular membrane-bounded organelle;GO:004445…	GO:0005515//protein binding;GO:0097159//organic cyclic compound binding;GO:0005488//binding	GO:0010467//gene expression;GO:0006396//RNA processing;GO:0006807//nitrogen compound metabolic process;GO:0044238//primary metabolic process;GO:0006139//nucleobase-containing compound metabolic process;GO:0044260//cellular macromolecule metabolic process;GO:0034641//cellular nitrogen compound metabolic process;GO:0090304//nucleic acid metabolic process;GO:1901360//organic cyclic compound metaboli…
Unigene0000561	75.6666666666667	117	0.6597	0.9809	1.3066	1.5524	1.1722	1.4846	0.9824	1.40306666666667	0.514201094373272	0.293284740030355	1	no	nkd2l	PREDICTED: protein naked cuticle homolog 2-like [Sinocyclocheilus anshuiensis]	ko04310//Wnt signaling pathway//Signal transduction//Environmental Information Processing	GO:0044464//cell part;GO:0016020//membrane;GO:0005623//cell	-	GO:0032502//developmental process;GO:0050794//regulation of cellular process;GO:0009653//anatomical structure morphogenesis;GO:0009966//regulation of signal transduction;GO:0023051//regulation of signaling;GO:0048583//regulation of response to stimulus;GO:0023057//negative regulation of signaling;GO:0048856//anatomical structure development;GO:0065007//biological regulation;GO:0048646//anatomical…
Unigene0000562	2990.33333333333	2965.66666666667	68.6877	74.3867	49.5675	58.2052	64.4328	56.5705	64.2139666666667	59.7361666666667	-0.104282459200948	0.762436800812041	1	no	Ppif	PREDICTED: peptidyl-prolyl cis-trans isomerase A-like [Sinocyclocheilus grahami]	ko04020//Calcium signaling pathway//Signal transduction//Environmental Information Processing	-	GO:0016859//cis-trans isomerase activity;GO:0016853//isomerase activity;GO:0003824//catalytic activity	GO:0008152//metabolic process;GO:0044238//primary metabolic process;GO:0044267//cellular protein metabolic process;GO:0009987//cellular process;GO:0071704//organic substance metabolic process;GO:0043170//macromolecule metabolic process;GO:0019538//protein metabolic process;GO:0044237//cellular metabolic process;GO:0044260//cellular macromolecule metabolic process
Unigene0000563	20.3333333333333	17.6666666666667	0.4351	0.5556	1.3060	0.5985	1.0043	0.3327	0.765566666666667	0.645166666666667	-0.24685611339635	0.74232523922464	1	no	-	--	-	-	-	-
Unigene0000564	9.33333333333333	27.6666666666667	0.3397	0.4249	0.6492	1.4240	0.6989	1.6919	0.471266666666667	1.2716	1.43202937529955	0.0338374917041982	1	no	-	PREDICTED: neuron navigator 3-like [Poecilia mexicana]	-	-	-	-
Unigene0000565	23.6666666666667	20.3333333333333	0.5324	0.3642	0.7306	0.4069	0.3933	0.5088	0.5424	0.436333333333333	-0.313926487024898	0.62718739629182	1	no	-	--	-	-	-	-
Unigene0000566	15	18	0.6392	0.1614	1.4673	0.5861	0.7626	1.2179	0.755966666666667	0.855533333333333	0.178501444015963	0.845352354542156	1	no	-	--	-	-	-	-
Unigene0000567	86	82.6666666666667	2.6080	2.9464	1.9912	2.8543	2.0194	1.8523	2.5152	2.242	-0.165886844565817	0.739511100775667	1	no	-	--	-	-	-	-
Unigene0000568	219	380	0.5506	0.7991	1.3795	0.9366	0.9194	2.4744	0.909733333333333	1.44346666666667	0.666022171753719	0.202708116506233	1	no	CUX2	PREDICTED: homeobox protein cut-like 2 [Sinocyclocheilus anshuiensis]	-	-	-	-
Unigene0000569	1099	1659.66666666667	2.6097	4.4115	4.1247	7.1998	3.6354	4.5395	3.7153	5.1249	0.464045145171932	0.249488713372185	1	no	Apbb2	PREDICTED: amyloid beta A4 precursor protein-binding family B member 2-like isoform X4 [Sinocyclocheilus grahami]	-	-	-	-
Unigene0000570	2376.66666666667	1497	47.1916	7.9343	46.6619	19.2369	19.1947	22.5205	33.9292666666667	20.3173666666667	-0.739816822001275	0.158426428575587	1	no	PIM3	PREDICTED: serine/threonine-protein kinase 33-like [Cyprinus carpio]	-	-	-	-
Unigene0000571	38.6666666666667	55	2.3620	3.5043	0.5402	2.6954	4.8266	1.2520	2.1355	2.92466666666667	0.453698307655935	0.520565394190643	1	no	-	PREDICTED: probable serine/threonine-protein kinase clkA [Sinocyclocheilus grahami]	-	-	-	-
Unigene0000572	18	16.6666666666667	1.8213	2.1746	0.6815	1.3665	1.6509	1.0633	1.55913333333333	1.36023333333333	-0.196890157669367	0.798882410614946	1	no	-	PREDICTED: probable serine/threonine-protein kinase clkA [Sinocyclocheilus grahami]	-	-	-	-
Unigene0000573	119	217.333333333333	3.5555	9.3482	2.5654	2.6232	17.1595	7.6111	5.15636666666667	9.13126666666667	0.824460144496154	0.212609865149489	1	no	-	PREDICTED: mucin-2-like [Sinocyclocheilus anshuiensis]	-	-	-	-
Unigene0000574	60.3333333333333	65.6666666666667	2.8650	5.8312	0.9310	3.4568	4.9003	1.5679	3.20906666666667	3.30833333333333	0.0439508403751881	0.954972810054453	1	no	-	PREDICTED: mucin-2-like [Sinocyclocheilus anshuiensis]	-	-	-	-
Unigene0000575	85	85.6666666666667	1.9026	4.3928	0.7510	1.9119	3.5803	1.2673	2.3488	2.25316666666667	-0.0599698396670453	0.931746551816655	1	no	MUC5B	PREDICTED: mucin-2 [Danio rerio]	-	-	-	-
Unigene0000576	45	30.6666666666667	1.4573	1.9747	1.4639	0.7954	1.3069	1.0504	1.63196666666667	1.0509	-0.634986196224235	0.241907973156076	1	no	-	PREDICTED: transmembrane protein 182 isoform X1 [Hippocampus comes]	-	-	-	-
Unigene0000577	0	0	0.0000	0.0000	0.0000	0.0000	0.0000	0.0000	0.001	0.001	0	notest	notest	notest	-	--	-	-	-	-
Unigene0000578	23.3333333333333	24.3333333333333	0.9327	1.5555	0.7770	1.1404	0.7381	1.2224	1.0884	1.03363333333333	-0.0744843607631203	0.91784701505538	1	no	-	--	-	-	-	-
Unigene0000579	0.333333333333333	0.333333333333333	0.0000	0.1044	0.0000	0.0000	0.0000	0.0875	0.0348	0.0291666666666667	-0.254766789850192	1	1	no	-	--	-	-	-	-
Unigene0000580	0	0	0.0000	0.0000	0.0000	0.0000	0.0000	0.0000	0.001	0.001	0	notest	notest	notest	-	--	-	-	-	-
Unigene0000581	72.3333333333333	62.3333333333333	2.2851	2.2926	0.8083	1.4843	1.7141	1.1793	1.79533333333333	1.45923333333333	-0.299041138578361	0.590533845064357	1	no	-	--	-	-	-	-
Unigene0000582	23.6666666666667	32.3333333333333	2.3362	1.2074	1.2020	2.7968	2.0130	1.3098	1.58186666666667	2.03986666666667	0.366846853137592	0.55937407021169	1	no	-	--	-	-	-	-
Unigene0000583	202	137.666666666667	9.0167	11.4184	9.4245	7.6188	7.4788	4.0711	9.9532	6.38956666666667	-0.639442340876414	0.163097344017569	1	no	-	--	-	-	-	-
Unigene0000584	10.6666666666667	5.66666666666667	0.4015	0.3195	0.4882	0.1673	0.2022	0.2344	0.403066666666667	0.2013	-1.00167130598521	0.170939556431999	1	no	-	--	-	-	-	-
Unigene0000585	2.66666666666667	8.33333333333333	0.1732	0.0948	0.4456	0.3177	0.4797	1.2713	0.237866666666667	0.689566666666667	1.5355369223653	0.126329560871449	1	no	-	--	-	-	-	-
Unigene0000586	1637	2007.66666666667	10.1522	23.5203	7.3960	13.7174	18.9729	14.2537	13.6895	15.648	0.192908521333901	0.66351707353801	1	no	PGR	PREDICTED: LOW QUALITY PROTEIN: progesterone receptor-like [Cyprinus carpio]	ko04114//Oocyte meiosis//Cell growth and death//Cellular Processes;ko04914//Progesterone-mediated oocyte maturation//Endocrine system//Organismal Systems	GO:0043226//organelle;GO:0043231//intracellular membrane-bounded organelle;GO:0005623//cell;GO:0005622//intracellular;GO:0044424//intracellular part;GO:0043229//intracellular organelle;GO:0043227//membrane-bounded organelle;GO:0044464//cell part	GO:0003677//DNA binding;GO:0060089//molecular transducer activity;GO:0001071//nucleic acid binding transcription factor activity;GO:0043167//ion binding;GO:0003676//nucleic acid binding;GO:1901363//heterocyclic compound binding;GO:0046914//transition metal ion binding;GO:0043169//cation binding;GO:0005488//binding;GO:0097159//organic cyclic compound binding;GO:0038023//signaling receptor activity…	GO:0023052//signaling;GO:0009725//response to hormone;GO:0071495//cellular response to endogenous stimulus;GO:0050896//response to stimulus;GO:0018130//heterocycle biosynthetic process;GO:0044238//primary metabolic process;GO:0006807//nitrogen compound metabolic process;GO:0007154//cell communication;GO:0007165//signal transduction;GO:1901576//organic substance biosynthetic process;GO:0042221//re…
Unigene0000587	712.333333333333	439.333333333333	52.5424	15.9878	57.8718	21.0192	20.2134	32.0475	42.134	24.4267	-0.786525913498216	0.107238896581103	1	no	-	--	-	-	-	-
Unigene0000588	41.3333333333333	45	0.6461	0.8119	1.6253	0.9436	0.7423	1.4051	1.02776666666667	1.03033333333333	0.00359838607578506	1	1	no	-	--	-	-	-	-
Unigene0000589	695	920.333333333333	5.3967	7.3472	4.0562	7.2782	8.1792	5.4454	5.60003333333333	6.9676	0.315226388629786	0.428024414677964	1	no	Znf319	PREDICTED: zinc finger protein 319-like [Danio rerio]	-	-	-	-
Unigene0000590	22.3333333333333	29	0.8009	1.5983	0.9211	0.5616	2.4529	1.1669	1.10676666666667	1.3938	0.332672461009333	0.636743712126096	1	no	-	--	-	-	-	-
Unigene0000591	17.6666666666667	20	1.4732	0.4031	0.9745	0.9649	0.9909	1.1102	0.950266666666667	1.022	0.104990867517133	0.90391045070703	1	no	-	--	-	-	-	-
Unigene0000592	1699.33333333333	1728	15.1038	13.9917	16.3737	10.9427	13.7727	18.5069	15.1564	14.4074333333333	-0.0731137762930845	0.841036710190428	1	no	spop	speckle-type POZ protein [Danio rerio]	-	GO:1902494//catalytic complex;GO:0005622//intracellular;GO:0043234//protein complex;GO:0005634//nucleus;GO:0043233//organelle lumen;GO:0043229//intracellular organelle;GO:0000151//ubiquitin ligase complex;GO:0070013//intracellular organelle lumen;GO:0044422//organelle part;GO:0044464//cell part;GO:0031974//membrane-enclosed lumen;GO:0043226//organelle;GO:0044446//intracellular organelle part;GO:0…	GO:0005515//protein binding;GO:0005488//binding;GO:0044389//ubiquitin-like protein ligase binding;GO:0019899//enzyme binding	GO:0036211//protein modification process;GO:0071704//organic substance metabolic process;GO:0048583//regulation of response to stimulus;GO:0033500//carbohydrate homeostasis;GO:0016567//protein ubiquitination;GO:0051603//proteolysis involved in cellular protein catabolic process;GO:0006464//cellular protein modification process;GO:0044248//cellular catabolic process;GO:0043067//regulation of progr…
Unigene0000593	67.6666666666667	66	3.3751	4.5019	3.3104	6.0447	1.5774	2.2255	3.72913333333333	3.28253333333333	-0.18403071947503	0.762276542056944	1	no	-	--	-	-	-	-
Unigene0000594	188.666666666667	317	2.0306	4.8585	1.4987	4.7255	5.1507	3.2247	2.79593333333333	4.36696666666667	0.643301557697661	0.203114668412514	1	no	-	--	-	-	-	-
Unigene0000595	313.333333333333	317.333333333333	7.7770	6.4060	12.1858	7.0568	9.9367	8.3778	8.7896	8.4571	-0.0556344745125313	0.898972602538251	1	no	-	--	-	-	-	-
Unigene0000596	19.3333333333333	7.66666666666667	1.1809	0.8913	0.3771	0.1120	0.4511	0.3736	0.816433333333333	0.312233333333333	-1.38671052147596	0.0710500846975411	1	no	-	PREDICTED: polyglutamine-binding protein 1-like [Acanthisitta chloris]	-	-	-	-
Unigene0000597	34.3333333333333	63	0.6692	1.8310	1.1362	3.7738	0.8155	1.3506	1.21213333333333	1.97996666666667	0.707927739897962	0.290488749692664	1	no	Tf2-9	PREDICTED: RNA-directed DNA polymerase homolog, partial [Danio rerio]	-	-	-	-
Unigene0000598	3286.66666666667	3277	38.2596	16.8567	72.3510	25.9520	34.9758	58.4696	42.4891	39.7991333333333	-0.0943557699912797	0.847127847027371	1	no	dnaaf2	PREDICTED: protein kintoun isoform X2 [Sinocyclocheilus grahami]	-	-	-	-
Unigene0000599	16.6666666666667	25.3333333333333	1.2270	0.3950	2.0796	1.0589	0.8795	3.2445	1.23386666666667	1.72763333333333	0.485610554303351	0.543268162279127	1	no	-	PREDICTED: serine/arginine repetitive matrix protein 2-like isoform X1 [Hippocampus comes]	-	-	-	-
Unigene0000600	12.6666666666667	5.66666666666667	1.0474	0.2866	2.0658	0.0000	1.1603	0.4004	1.13326666666667	0.520233333333333	-1.12325663240411	0.293974063831887	1	no	-	--	-	-	-	-
Unigene0000601	36.6666666666667	60.3333333333333	0.9068	4.3005	3.5770	6.9291	2.8463	3.2583	2.9281	4.34456666666667	0.569247462583094	0.381072244824812	1	no	-	PREDICTED: protein NLRC5-like, partial [Sinocyclocheilus grahami]	-	-	-	-
Unigene0000602	96	169.333333333333	3.4249	1.9480	2.6364	7.1466	2.8980	3.0184	2.66976666666667	4.35433333333333	0.705738194894373	0.176036225401679	1	no	-	PREDICTED: uncharacterized protein LOC107741621 [Sinocyclocheilus rhinocerous]	-	-	-	-
Unigene0000603	328.333333333333	702.666666666667	2.2410	3.1153	3.9241	9.5786	3.7641	4.7751	3.09346666666667	6.03926666666667	0.965148888843897	0.0351676093390382	1	no	-	PREDICTED: protein NLRC5-like, partial [Sinocyclocheilus grahami]	-	-	-	-
Unigene0000604	36	27.6666666666667	0.9054	0.5844	1.0989	0.5535	0.3858	0.8945	0.8629	0.611266666666667	-0.497391480822383	0.396479233309876	1	no	-	--	-	-	-	-
Unigene0000605	67	90.6666666666667	1.2902	1.4121	0.9028	1.5932	1.3341	1.5940	1.2017	1.5071	0.326698369205575	0.502448859719889	1	no	MRAS	PREDICTED: ras-related protein M-Ras-like [Sinocyclocheilus anshuiensis]	ko04010//MAPK signaling pathway//Signal transduction//Environmental Information Processing;ko04810//Regulation of actin cytoskeleton//Cell motility//Cellular Processes;ko04530//Tight junction//Cellular commiunity//Cellular Processes	-	GO:0005488//binding;GO:0097367//carbohydrate derivative binding;GO:1901363//heterocyclic compound binding;GO:0032550//purine ribonucleoside binding;GO:0001883//purine nucleoside binding;GO:0001882//nucleoside binding;GO:0097159//organic cyclic compound binding;GO:0036094//small molecule binding;GO:0003824//catalytic activity;GO:0032549//ribonucleoside binding	GO:1901135//carbohydrate derivative metabolic process;GO:0044700//single organism signaling;GO:0019693//ribose phosphate metabolic process;GO:0034655//nucleobase-containing compound catabolic process;GO:0009056//catabolic process;GO:0055086//nucleobase-containing small molecule metabolic process;GO:1901575//organic substance catabolic process;GO:0046483//heterocycle metabolic process;GO:0072521//…
Unigene0000606	2793	3431.33333333333	12.8492	13.3784	12.4420	11.3716	17.3208	16.1665	12.8898666666667	14.9529666666667	0.214194402854649	0.534255758254501	1	no	SOS1	PREDICTED: son of sevenless homolog 1 isoform X1 [Pygocentrus nattereri]	ko04010//MAPK signaling pathway//Signal transduction//Environmental Information Processing;ko04510//Focal adhesion//Cellular commiunity//Cellular Processes;ko04810//Regulation of actin cytoskeleton//Cell motility//Cellular Processes;ko04068//FoxO signaling pathway//Signal transduction//Environmental Information Processing;ko04910//Insulin signaling pathway//Endocrine system//Organismal Systems;ko…	-	-	-
Unigene0000607	79.3333333333333	137.333333333333	1.5253	1.9549	1.5077	2.9629	2.9794	2.1543	1.66263333333333	2.69886666666667	0.698883663608509	0.135488849508529	1	no	hoxb7a	PREDICTED: homeobox protein Hox-B7a-like [Sinocyclocheilus anshuiensis]	-	GO:0043227//membrane-bounded organelle;GO:0043226//organelle;GO:0044464//cell part;GO:0005622//intracellular;GO:0005623//cell;GO:0043229//intracellular organelle;GO:0043231//intracellular membrane-bounded organelle;GO:0044424//intracellular part	GO:0001071//nucleic acid binding transcription factor activity;GO:0003676//nucleic acid binding;GO:1901363//heterocyclic compound binding;GO:0005488//binding;GO:0003677//DNA binding;GO:0097159//organic cyclic compound binding	GO:0006139//nucleobase-containing compound metabolic process;GO:0043170//macromolecule metabolic process;GO:0032774//RNA biosynthetic process;GO:0008152//metabolic process;GO:0044238//primary metabolic process;GO:0018130//heterocycle biosynthetic process;GO:0006725//cellular aromatic compound metabolic process;GO:0009059//macromolecule biosynthetic process;GO:0097659//nucleic acid-templated trans…
Unigene0000608	964.333333333333	719.333333333333	9.9037	7.8905	7.1451	6.7024	6.2920	4.5468	8.3131	5.84706666666667	-0.507673525494126	0.1830448481445	1	no	ZNF34	PREDICTED: zinc finger protein 501-like isoform X2 [Sinocyclocheilus grahami]	-	-	GO:0097159//organic cyclic compound binding;GO:0043169//cation binding;GO:0005488//binding;GO:0043167//ion binding	-
Unigene0000609	46.6666666666667	58.6666666666667	0.7734	1.1202	1.4278	1.4391	1.3607	1.1060	1.10713333333333	1.30193333333333	0.233826597902483	0.667584077517846	1	no	-	--	-	-	-	-
Unigene0000610	54	63	1.3401	0.6404	1.1654	0.5712	1.4429	1.5065	1.04863333333333	1.17353333333333	0.162348509884097	0.780539912902848	1	no	eif4e1b	PREDICTED: eukaryotic translation initiation factor 4E-1B-like isoform X2 [Cyprinus carpio]	ko03013//RNA transport//Translation//Genetic Information Processing;ko04910//Insulin signaling pathway//Endocrine system//Organismal Systems;ko04150//mTOR signaling pathway//Signal transduction//Environmental Information Processing	GO:0043231//intracellular membrane-bounded organelle;GO:0044424//intracellular part;GO:0034518//RNA cap binding complex;GO:0043229//intracellular organelle;GO:0043227//membrane-bounded organelle;GO:0005623//cell;GO:0043234//protein complex;GO:0044464//cell part;GO:0043226//organelle;GO:0005622//intracellular;GO:0032991//macromolecular complex	GO:1901363//heterocyclic compound binding;GO:0097159//organic cyclic compound binding;GO:0003723//RNA binding;GO:0005488//binding;GO:0003676//nucleic acid binding;GO:0008135//translation factor activity, RNA binding	GO:0044238//primary metabolic process;GO:0071704//organic substance metabolic process;GO:0044260//cellular macromolecule metabolic process;GO:0034645//cellular macromolecule biosynthetic process;GO:0044237//cellular metabolic process;GO:0006518//peptide metabolic process;GO:0044267//cellular protein metabolic process;GO:0006412//translation;GO:1901564//organonitrogen compound metabolic process;GO…
Unigene0000611	36.6666666666667	13	2.1577	0.6011	1.6552	0.5756	0.3477	0.5399	1.47133333333333	0.487733333333333	-1.59295964941826	0.0167932591343408	0.868042214745768	no	-	--	-	-	-	-
Unigene0000612	41	115	1.2330	5.1137	2.1369	7.6763	3.3071	10.1210	2.82786666666667	7.0348	1.31479530911878	0.0377950644873924	1	no	-	--	-	-	-	-
Unigene0000613	173.333333333333	334	1.8746	3.0158	1.2783	6.4928	2.4146	1.8856	2.05623333333333	3.59766666666667	0.807057538045968	0.138770256918511	1	no	GIMAP7	PREDICTED: GTPase IMAP family member 7-like [Sinocyclocheilus rhinocerous]	-	-	GO:1901363//heterocyclic compound binding;GO:0097159//organic cyclic compound binding;GO:0032550//purine ribonucleoside binding;GO:0036094//small molecule binding;GO:0097367//carbohydrate derivative binding;GO:0005488//binding;GO:0001882//nucleoside binding;GO:0032549//ribonucleoside binding;GO:0001883//purine nucleoside binding	-
Unigene0000614	1404.66666666667	1832.33333333333	8.3567	9.7177	10.9331	10.2091	13.1326	12.2521	9.66916666666667	11.8646	0.295200000644322	0.40275840186145	1	no	gag-pol	PREDICTED: protein NYNRIN-like [Oreochromis niloticus]	-	-	-	-
Unigene0000615	1824.33333333333	2498.33333333333	7.4133	10.9305	10.0779	12.8849	11.8624	11.4507	9.4739	12.066	0.348917138465538	0.318218407253309	1	no	pol	PREDICTED: protein NYNRIN-like [Oreochromis niloticus]	-	-	-	-
Unigene0000616	327.333333333333	361	6.3487	6.3862	8.2245	6.6693	7.3293	7.6716	6.98646666666667	7.2234	0.048115050744567	0.906299931865875	1	no	CRYBA2	PREDICTED: beta-crystallin A2-like [Sinocyclocheilus rhinocerous]	-	-	-	-
Unigene0000617	43.6666666666667	57.3333333333333	3.3425	5.1023	3.6207	3.9523	4.1903	6.4559	4.02183333333333	4.86616666666667	0.274932436643242	0.604666095166443	1	no	-	PREDICTED: zinc finger protein ZFP69-like isoform X1 [Ictalurus punctatus]	-	-	-	-
Unigene0000618	1	0	0.1993	0.0000	0.0000	0.0000	0.0000	0.0000	0.0664333333333333	0.001	-6.05383539923054	0.349172512193306	1	no	-	--	-	-	-	-
Unigene0000619	19	23	0.5695	0.7192	1.3074	0.7633	1.1648	1.0450	0.865366666666667	0.991033333333333	0.195622032967699	0.791584715445221	1	no	-	--	-	-	-	-
Unigene0000620	0.333333333333333	0	0.0000	0.0000	0.0986	0.0000	0.0000	0.0000	0.0328666666666667	0.001	-5.03855324076939	1	1	no	-	--	-	-	-	-
Unigene0000621	197.333333333333	165.666666666667	3.6774	2.9787	3.2842	2.1094	1.9922	3.6264	3.31343333333333	2.576	-0.363194299060663	0.421379558111418	1	no	-	PREDICTED: L-rhamnose-binding lectin CSL2-like [Sinocyclocheilus rhinocerous]	-	-	-	-
Unigene0000622	159.666666666667	227.666666666667	1.7890	3.6673	1.7094	3.2939	3.4762	2.7224	2.38856666666667	3.16416666666667	0.405680449063807	0.389237892964565	1	no	SLC25A15	PREDICTED: mitochondrial ornithine transporter 1-like [Sinocyclocheilus grahami]	-	GO:0044425//membrane part;GO:0031224//intrinsic component of membrane;GO:0016020//membrane	-	-
Unigene0000623	122.333333333333	198.666666666667	2.1720	3.3717	2.9650	3.6379	5.2791	4.1073	2.83623333333333	4.34143333333333	0.614195203953744	0.172787110821638	1	no	-	--	-	-	-	-
Unigene0000624	25	20	1.2868	1.1971	2.5159	1.0029	1.6394	1.1805	1.6666	1.27426666666667	-0.387240662231873	0.548401454243826	1	no	-	--	-	-	-	-
Unigene0000625	78	89.3333333333333	2.8186	1.2936	3.1812	2.1677	1.8131	3.7814	2.43113333333333	2.5874	0.0898740863487787	0.878782379450841	1	no	-	--	-	-	-	-
Unigene0000626	873.333333333333	1018.66666666667	5.8939	7.5927	5.8040	6.5359	6.8264	7.5740	6.4302	6.97876666666667	0.118108485719958	0.747451953775417	1	no	ATF7	PREDICTED: cyclic AMP-dependent transcription factor ATF-7-like isoform X2 [Sinocyclocheilus grahami]	-	-	GO:0097159//organic cyclic compound binding;GO:1901363//heterocyclic compound binding;GO:0003676//nucleic acid binding;GO:0005488//binding;GO:0001071//nucleic acid binding transcription factor activity;GO:0003677//DNA binding	GO:0097659//nucleic acid-templated transcription;GO:0006139//nucleobase-containing compound metabolic process;GO:0008152//metabolic process;GO:0016070//RNA metabolic process;GO:0009058//biosynthetic process;GO:0009987//cellular process;GO:0034645//cellular macromolecule biosynthetic process;GO:1901360//organic cyclic compound metabolic process;GO:0044238//primary metabolic process;GO:0019438//aro…
Unigene0000627	280.666666666667	342	3.6865	3.7224	2.5956	4.5002	3.9070	3.0051	3.33483333333333	3.8041	0.18994051053159	0.650631017450781	1	no	plekha8	PREDICTED: pleckstrin homology domain-containing family A member 8 isoform X1 [Sinocyclocheilus rhinocerous]	-	GO:0043231//intracellular membrane-bounded organelle;GO:0043226//organelle;GO:0005623//cell;GO:0044424//intracellular part;GO:0043227//membrane-bounded organelle;GO:0044464//cell part;GO:0005622//intracellular;GO:0043229//intracellular organelle	GO:0005319//lipid transporter activity;GO:0005215//transporter activity;GO:0022892//substrate-specific transporter activity;GO:0008289//lipid binding;GO:0005488//binding	GO:0051234//establishment of localization;GO:0008104//protein localization;GO:0051179//localization;GO:0033036//macromolecule localization;GO:0045184//establishment of protein localization
Unigene0000628	46	59.3333333333333	1.5922	0.6224	3.1599	0.9386	1.9319	3.6518	1.7915	2.1741	0.279250256607799	0.688623969572704	1	no	-	--	-	-	-	-
Unigene0000629	20	22.3333333333333	2.5190	1.0025	1.1783	0.8399	1.9450	2.2409	1.5666	1.67526666666667	0.0967538965971765	0.916000131620619	1	no	-	--	-	-	-	-
Unigene0000630	50	38.6666666666667	1.2566	0.2838	1.5188	0.7864	0.8397	0.6404	1.01973333333333	0.7555	-0.432688267207396	0.505092711802618	1	no	Myt1l	PREDICTED: myelin transcription factor 1-like protein [Sinocyclocheilus anshuiensis]	-	-	-	-
Unigene0000631	81.3333333333333	15	1.9622	2.6689	0.2549	0.0000	0.9498	0.0000	1.62866666666667	0.3166	-2.36295820229628	0.0719909416790201	1	no	-	PREDICTED: sterile alpha motif domain-containing protein 3-like [Danio rerio]	-	-	-	-
Unigene0000632	31	80.3333333333333	3.4986	0.0000	2.4874	11.0242	2.5370	0.9337	1.99533333333333	4.83163333333333	1.27588119636327	0.221505476429403	1	no	-	--	-	-	-	-
Unigene0000633	2294.66666666667	2064	46.4603	20.4598	77.0533	26.0579	26.3215	67.6867	47.9911333333333	40.0220333333333	-0.261973417653449	0.604728769654534	1	no	stpg1	PREDICTED: O(6)-methylguanine-induced apoptosis 2-like [Sinocyclocheilus anshuiensis]	-	-	-	-
Unigene0000634	47.3333333333333	59.3333333333333	1.4313	1.0910	1.2362	1.2891	1.5857	1.5711	1.25283333333333	1.48196666666667	0.242318494883339	0.63446451342919	1	no	-	--	-	-	-	-
Unigene0000635	47.6666666666667	79.3333333333333	1.6397	2.1136	1.6873	3.6753	3.0679	1.7383	1.81353333333333	2.82716666666667	0.640553672441428	0.217948133235046	1	no	-	--	-	-	-	-
Unigene0000636	13.6666666666667	16.3333333333333	0.5025	0.2062	0.6141	0.4608	0.0348	0.9220	0.440933333333333	0.472533333333333	0.0998555583639037	0.938233459058746	1	no	-	reverse transcriptase [Danio rerio]	-	-	-	-
Unigene0000637	452.666666666667	586.333333333333	7.8724	9.1627	11.2059	11.2495	11.7983	11.2184	9.41366666666667	11.4220666666667	0.278995036326903	0.466335260160634	1	no	X-element\ORF2	reverse transcriptase [Danio rerio]	-	-	-	-
Unigene0000638	699	1046	2.7534	2.7775	3.6822	2.3813	3.6502	6.7711	3.07103333333333	4.26753333333333	0.474678250493753	0.27953326981898	1	no	prmt8b	PREDICTED: ras and EF-hand domain-containing protein homolog [Sinocyclocheilus anshuiensis]	-	GO:0044464//cell part;GO:0016020//membrane;GO:0005622//intracellular;GO:0044424//intracellular part;GO:0005623//cell	GO:0016741//transferase activity, transferring one-carbon groups;GO:0003824//catalytic activity;GO:0016273//arginine N-methyltransferase activity;GO:0016274//protein-arginine N-methyltransferase activity;GO:0008168//methyltransferase activity;GO:0016740//transferase activity;GO:0008276//protein methyltransferase activity;GO:0008757//S-adenosylmethionine-dependent methyltransferase activity;GO:000…	GO:0036211//protein modification process;GO:0044699//single-organism process;GO:0035247//peptidyl-arginine omega-N-methylation;GO:0030182//neuron differentiation;GO:0044237//cellular metabolic process;GO:0048699//generation of neurons;GO:0022008//neurogenesis;GO:0019538//protein metabolic process;GO:0048731//system development;GO:0043414//macromolecule methylation;GO:0032501//multicellular organi…
Unigene0000639	1655	1837.66666666667	16.8922	10.8030	9.2172	13.4777	11.8518	13.0883	12.3041333333333	12.8059333333333	0.0576693623262171	0.87720362618574	1	no	-	PREDICTED: uncharacterized protein LOC103912045 isoform X1 [Danio rerio]	-	-	-	-
Unigene0000640	9.33333333333333	11.6666666666667	0.8614	0.5387	0.3799	0.5642	1.0224	0.5644	0.593333333333333	0.717	0.273130283569302	0.744757761005344	1	no	-	--	-	-	-	-
Unigene0000641	6.33333333333333	5.33333333333333	0.4430	0.0808	0.9117	0.1354	0.2454	0.7451	0.4785	0.3753	-0.350474634486412	0.79676501233084	1	no	-	--	-	-	-	-
Unigene0000642	103.666666666667	110	1.6179	0.8693	2.2249	1.2138	0.7821	2.5908	1.5707	1.5289	-0.038913607439951	0.954780185923649	1	no	-	hypothetical protein cypCar_00008992 [Cyprinus carpio]	-	-	-	-
Unigene0000643	89	57	2.3076	1.9705	2.7400	2.2555	1.5170	0.4653	2.33936666666667	1.4126	-0.727765002326079	0.216035845617304	1	no	-	--	-	-	-	-
Unigene0000644	106.333333333333	100.333333333333	9.4719	8.4107	11.6782	12.2908	7.7216	5.9845	9.8536	8.66563333333333	-0.185345714117694	0.714650975348442	1	no	-	--	-	-	-	-
Unigene0000645	27.3333333333333	21	1.9370	1.3250	1.8688	0.6661	1.1400	1.8882	1.71026666666667	1.23143333333333	-0.473882763140245	0.46763707063735	1	no	-	--	-	-	-	-
Unigene0000646	22.6666666666667	17.3333333333333	0.7633	0.8818	1.3528	0.8166	0.8457	0.5058	0.9993	0.7227	-0.46752096043588	0.472064712110883	1	no	-	--	-	-	-	-
Unigene0000647	23.3333333333333	65	0.1804	0.4937	0.6499	1.1747	0.6597	1.5064	0.441333333333333	1.1136	1.33529049487531	0.0316086505257353	1	no	-	PREDICTED: microfibril-associated glycoprotein 4-like, partial [Sinocyclocheilus rhinocerous]	-	-	-	-
Unigene0000648	106.666666666667	102.666666666667	2.4689	1.7238	2.8473	2.3030	1.1554	2.7532	2.34666666666667	2.07053333333333	-0.180610499426579	0.731954526383063	1	no	-	--	-	-	-	-
Unigene0000649	100.666666666667	129	7.4488	6.2711	4.2453	6.0422	8.0617	7.6222	5.9884	7.24203333333333	0.27422422661496	0.564930863215349	1	no	-	--	-	-	-	-
Unigene0000650	61.3333333333333	59.3333333333333	0.8125	1.3974	5.1760	3.7607	0.5572	2.0943	2.46196666666667	2.1374	-0.203954304942373	0.803544555044442	1	no	-	--	-	-	-	-
Unigene0000651	29	23.6666666666667	0.9838	0.6381	1.6498	1.1360	0.7266	0.6351	1.09056666666667	0.832566666666667	-0.389440261248623	0.541712290489363	1	no	-	--	-	-	-	-
Unigene0000652	157.333333333333	219	2.1640	2.1790	1.7306	3.5378	2.6577	1.7131	2.02453333333333	2.6362	0.380870430371882	0.404504816627963	1	no	BTN3A2	PREDICTED: butyrophilin subfamily 1 member A1-like [Sinocyclocheilus grahami]	ko04514//Cell adhesion molecules (CAMs)//Signaling molecules and interaction//Environmental Information Processing	-	-	-
Unigene0000653	1448	1394.66666666667	10.4690	7.8590	7.8079	9.5891	6.6422	7.2060	8.71196666666667	7.81243333333333	-0.157226460478906	0.667681295041146	1	no	Tmem65	PREDICTED: transmembrane protein 65 isoform X2 [Sinocyclocheilus anshuiensis]	-	-	-	-
Unigene0000654	59.6666666666667	66.3333333333333	0.3600	0.8516	0.9680	1.0117	0.7977	0.4475	0.726533333333333	0.7523	0.0502791001720431	0.935051842570602	1	no	TY3B-I	PREDICTED: protein turtle homolog B-like [Sinocyclocheilus anshuiensis]	-	-	-	-
Unigene0000655	103	199.333333333333	1.1666	1.8162	0.2898	3.5598	1.4930	0.7197	1.09086666666667	1.92416666666667	0.818758991092474	0.229980023356738	1	no	-	PREDICTED: SLAM family member 5-like [Sinocyclocheilus anshuiensis]	-	-	-	-
Unigene0000656	5.66666666666667	8.33333333333333	0.0610	0.1336	0.8792	0.2238	0.3380	0.8958	0.357933333333333	0.485866666666667	0.440869554241515	0.671591790913682	1	no	-	--	-	-	-	-
Unigene0000657	131.333333333333	153.333333333333	2.0297	3.3112	2.5616	3.4765	2.8002	2.2837	2.63416666666667	2.85346666666667	0.115369080577682	0.806568293708743	1	no	-	--	-	-	-	-
Unigene0000658	2405.66666666667	2475	15.8986	18.3121	14.0130	18.6448	12.9633	14.2624	16.0745666666667	15.2901666666667	-0.0721757138148111	0.83696975110168	1	no	set-1	PREDICTED: uncharacterized protein LOC103911548 [Danio rerio]	-	-	-	-
Unigene0000659	934.333333333333	1409.66666666667	13.7878	8.2948	20.0528	20.7288	25.3505	14.8155	14.0451333333333	20.2982666666667	0.531286216038096	0.207636362178062	1	no	-	PREDICTED: probable GPI-anchored adhesin-like protein PGA55 isoform X1 [Stegastes partitus]	-	-	-	-
Unigene0000660	63.6666666666667	60.3333333333333	1.1986	1.8280	0.9099	1.9099	1.1102	0.4326	1.31216666666667	1.1509	-0.189188492227631	0.755880700558816	1	no	-	--	-	-	-	-
Unigene0000661	28.6666666666667	28	0.4450	0.2922	1.2365	0.9182	0.3451	0.5103	0.6579	0.5912	-0.154222043248599	0.838083053418253	1	no	-	--	-	-	-	-
Unigene0000662	588.666666666667	719.333333333333	4.8263	4.2655	3.7159	4.2271	5.0219	5.4402	4.26923333333333	4.8964	0.197744405765631	0.599617028285181	1	no	Gtpbp2	PREDICTED: GTP-binding protein 2-like [Sinocyclocheilus rhinocerous]	-	-	GO:0032550//purine ribonucleoside binding;GO:0036094//small molecule binding;GO:0032549//ribonucleoside binding;GO:0005488//binding;GO:0097367//carbohydrate derivative binding;GO:0001883//purine nucleoside binding;GO:0097159//organic cyclic compound binding;GO:1901363//heterocyclic compound binding;GO:0001882//nucleoside binding	-
Unigene0000663	1166.33333333333	1924	6.0400	8.7389	7.3813	10.6048	11.9533	11.5716	7.38673333333333	11.3765666666667	0.623056831164062	0.0801949089074351	1	no	pol	PREDICTED: myosin-IIIa-like [Sinocyclocheilus rhinocerous]	-	-	-	-
Unigene0000664	135.333333333333	274.666666666667	5.3181	9.2289	5.8671	11.7302	13.4819	13.3183	6.8047	12.8434666666667	0.91643119867214	0.0386683615989503	1	no	-	PREDICTED: receptor-type tyrosine-protein phosphatase mu-like [Sinocyclocheilus grahami]	-	-	-	-
Unigene0000665	1	0.333333333333333	0.2145	0.0000	0.1103	0.0000	0.1188	0.0000	0.108266666666667	0.0396	-1.45101679638441	0.685067249306245	1	no	-	PREDICTED: receptor-type tyrosine-protein phosphatase mu-like [Sinocyclocheilus grahami]	-	-	-	-
Unigene0000666	15	19.6666666666667	0.8982	0.8426	1.2544	1.4707	1.4215	0.8240	0.9984	1.23873333333333	0.311175807338836	0.646226544084716	1	no	-	--	-	-	-	-
Unigene0000667	17	16.3333333333333	0.9481	1.6214	0.6098	0.7607	1.1160	0.9786	1.05976666666667	0.951766666666667	-0.155066821870602	0.857386078939139	1	no	-	--	-	-	-	-
Unigene0000668	530.666666666667	735.666666666667	6.8775	8.3466	7.7908	12.1171	9.0171	8.4848	7.67163333333333	9.873	0.363954758968014	0.338658148434871	1	no	RLN3	PREDICTED: relaxin-3-like [Sinocyclocheilus grahami]	-	-	-	-
Unigene0000669	185.666666666667	226	5.6923	9.3908	9.3035	13.5866	7.6046	6.1439	8.12886666666667	9.1117	0.164666022943419	0.731157451373583	1	no	-	--	-	-	-	-
Unigene0000670	2969.33333333333	3251.66666666667	10.1888	7.5532	8.8944	9.5733	7.8633	9.7635	8.8788	9.0667	0.0302128450459627	0.929614764346389	1	no	RNF212B	PREDICTED: homeobox and leucine zipper protein Homez-like [Sinocyclocheilus anshuiensis]	-	-	-	-
Unigene0000671	18	20.6666666666667	0.4390	0.5935	0.4252	0.9235	0.4863	0.1421	0.4859	0.5173	0.0903417590864694	0.915021335964229	1	no	-	--	-	-	-	-
Unigene0000672	26.3333333333333	37	0.3620	0.6464	0.5685	1.0132	0.7176	0.3321	0.525633333333333	0.687633333333333	0.387582713920002	0.539735662678241	1	no	-	--	-	-	-	-
Unigene0000673	54	80.3333333333333	3.6388	3.1167	2.1165	4.4005	4.3233	3.6770	2.95733333333333	4.1336	0.483101924096946	0.337149575670698	1	no	-	--	-	-	-	-
Unigene0000674	95	444.666666666667	0.7278	2.8893	0.7196	13.4517	1.6125	2.6707	1.44556666666667	5.91163333333333	2.03192164510036	0.00778931800657745	0.654564696542716	no	-	Mucin-12, partial [Columba livia]	-	-	-	-
Unigene0000675	3145.66666666667	3174.33333333333	28.7029	20.0891	28.8735	21.2909	21.2432	30.6485	25.8885	24.3942	-0.0857732054605929	0.809320027030876	1	no	MAD1L1	mitotic spindle assembly checkpoint protein MAD1 [Danio rerio]	ko04110//Cell cycle//Cell growth and death//Cellular Processes;ko04914//Progesterone-mediated oocyte maturation//Endocrine system//Organismal Systems	-	-	-
Unigene0000676	43.3333333333333	38	1.9398	2.4461	1.3452	1.8561	2.1957	0.7350	1.91036666666667	1.5956	-0.259750540305866	0.657412884954936	1	no	-	--	-	-	-	-
Unigene0000677	12.6666666666667	13	0.7633	1.0025	1.2568	1.3299	0.6765	0.8404	1.00753333333333	0.948933333333333	-0.0864489294503004	0.953623859172004	1	no	-	--	-	-	-	-
Unigene0000678	585	771.666666666667	5.7651	5.8323	9.8756	8.8757	7.0400	10.3294	7.15766666666667	8.74836666666667	0.289524329882526	0.472429403090731	1	no	-	--	-	-	-	-
Unigene0000679	302.333333333333	352.666666666667	4.6255	5.2290	8.0898	5.0094	7.0855	7.5964	5.98143333333333	6.56376666666667	0.134032714379882	0.755815585641052	1	no	-	TPA_exp: polyprotein [Danio rerio]	-	-	-	-
Unigene0000680	2951.66666666667	2679.33333333333	79.3530	68.5984	58.6251	51.4978	62.4917	62.4504	68.8588333333333	58.8133	-0.227499295672057	0.50577319194813	1	no	PQBP1	PREDICTED: polyglutamine-binding protein 1-like [Sinocyclocheilus anshuiensis]	ko03040//Spliceosome//Transcription//Genetic Information Processing	-	-	-
Unigene0000681	10099.6666666667	9871.66666666667	137.6353	57.7745	142.0808	60.1961	85.9988	163.1214	112.496866666667	103.105433333333	-0.125764458935897	0.778456374810098	1	no	tacc3	PREDICTED: transforming acidic coiled-coil-containing protein 3-like isoform X1 [Sinocyclocheilus rhinocerous]	ko03013//RNA transport//Translation//Genetic Information Processing	-	-	-
Unigene0000682	15	18	1.7723	0.4564	2.5747	1.9119	1.2704	2.1998	1.60113333333333	1.79403333333333	0.164113243591416	0.864873323523029	1	no	-	--	-	-	-	-
Unigene0000683	13423.6666666667	15432	521.5660	561.1377	478.1197	528.4334	650.2680	513.6682	520.274466666667	564.1232	0.116737363707488	0.72035576507683	1	no	rps27	40S ribosomal protein S27, partial [Scophthalmus maximus]	ko03010//Ribosome//Translation//Genetic Information Processing	GO:0044464//cell part;GO:0030529//intracellular ribonucleoprotein complex;GO:0005623//cell;GO:0005622//intracellular;GO:0044424//intracellular part;GO:0032991//macromolecular complex;GO:1990904//ribonucleoprotein complex	GO:0043167//ion binding;GO:0005198//structural molecule activity;GO:0043169//cation binding;GO:0005488//binding	GO:0071704//organic substance metabolic process;GO:0008152//metabolic process;GO:0010467//gene expression;GO:0043170//macromolecule metabolic process
Unigene0000684	224.333333333333	427.333333333333	17.9775	25.2538	21.9328	34.4993	50.6124	32.5609	21.7213666666667	39.2242	0.852629145303957	0.0417497317041874	1	no	LIAT1	Zgc:64189 [Danio rerio]	-	-	-	-
Unigene0000685	98	94.3333333333333	0.5280	0.9993	1.8452	0.6960	0.6337	1.6349	1.12416666666667	0.9882	-0.18598098155433	0.756130531701616	1	no	-	--	-	-	-	-
Unigene0000686	63	158.333333333333	0.8117	2.2353	2.1556	3.0012	6.0047	3.4351	1.7342	4.147	1.25779775746765	0.0208107113564115	0.931610245207802	no	-	--	-	-	-	-
Unigene0000687	1459.66666666667	1566.33333333333	10.7400	10.0325	8.9358	10.2195	9.6128	9.9610	9.90276666666667	9.9311	0.00412187779462433	0.991249587645455	1	no	CLINT1	PREDICTED: clathrin interactor 1-like isoform X1 [Cyprinus carpio]	ko04144//Endocytosis//Transport and catabolism//Cellular Processes	-	-	-
Unigene0000688	5	0.666666666666667	0.1589	0.1304	0.3269	0.0000	0.0000	0.0729	0.2054	0.0243	-3.07940796271241	0.0367493115072697	1	no	-	unnamed protein product [Oncorhynchus mykiss]	-	-	-	-
Unigene0000689	40.6666666666667	22.6666666666667	1.0695	1.0079	1.6814	0.7900	0.8228	0.3816	1.25293333333333	0.6648	-0.914317365884099	0.118361346955027	1	no	-	PREDICTED: uncharacterized protein LOC107727458 [Sinocyclocheilus rhinocerous]	-	-	-	-
Unigene0000690	2	9.66666666666667	0.0000	0.4481	0.0843	1.2014	0.9979	0.1502	0.177466666666667	0.783166666666667	2.14177129137658	0.0630637091115195	1	no	-	--	-	-	-	-
Unigene0000691	1.33333333333333	6	0.1456	0.0531	0.0000	0.2670	0.4301	0.1781	0.0662333333333333	0.291733333333333	2.13902086554289	0.0636517036806622	1	no	-	--	-	-	-	-
Unigene0000692	79	80	1.9282	1.8339	1.8897	1.8733	1.5767	1.8742	1.88393333333333	1.77473333333333	-0.0861456478499189	0.865084523366816	1	no	-	PREDICTED: HIRA-interacting protein 3-like isoform X3 [Sinocyclocheilus grahami]	-	-	-	-
Unigene0000693	10	15	0.4459	0.2789	0.2622	0.9346	0.3176	0.1169	0.329	0.456366666666667	0.472105836082138	0.586751135443792	1	no	-	PREDICTED: putative nuclease HARBI1 [Cyprinus carpio]	-	-	-	-
Unigene0000694	16.6666666666667	11.6666666666667	0.8691	0.9945	0.2033	0.6158	0.3501	0.3624	0.688966666666667	0.442766666666667	-0.637887570605351	0.390940459811881	1	no	-	--	-	-	-	-
Unigene0000695	4324	5973.33333333333	25.6640	41.0972	23.5413	48.4783	35.8947	30.8815	30.1008333333333	38.4181666666667	0.351985246391754	0.337127299865231	1	no	CANX	calnexin 2 [Cyprinus carpio]	ko04141//Protein processing in endoplasmic reticulum//Folding, sorting and degradation//Genetic Information Processing;ko04145//Phagosome//Transport and catabolism//Cellular Processes	GO:0005622//intracellular;GO:0043231//intracellular membrane-bounded organelle;GO:0043229//intracellular organelle;GO:0044424//intracellular part;GO:0043227//membrane-bounded organelle;GO:0044464//cell part;GO:0043226//organelle;GO:0005623//cell	GO:0003824//catalytic activity;GO:0004197//cysteine-type endopeptidase activity;GO:0016787//hydrolase activity;GO:0008234//cysteine-type peptidase activity;GO:0005488//binding;GO:0070011//peptidase activity, acting on L-amino acid peptides;GO:0008233//peptidase activity;GO:0004175//endopeptidase activity;GO:0005515//protein binding	GO:0044238//primary metabolic process;GO:0008152//metabolic process;GO:0044237//cellular metabolic process;GO:0044260//cellular macromolecule metabolic process;GO:0043170//macromolecule metabolic process;GO:0051604//protein maturation;GO:0019538//protein metabolic process;GO:0016485//protein processing;GO:0071704//organic substance metabolic process;GO:0010467//gene expression;GO:0006508//proteol…
Unigene0000696	166.333333333333	267.666666666667	0.7412	2.9821	1.7941	5.8586	0.7286	1.2259	1.83913333333333	2.60436666666667	0.501906502740781	0.477256170292589	1	no	SLC25A29	PREDICTED: mitochondrial basic amino acids transporter-like isoform X1 [Cyprinus carpio]	-	-	-	-
Unigene0000697	15	76	0.2656	0.5814	0.5467	2.6792	0.1308	3.3845	0.464566666666667	2.06483333333333	2.15206778916029	0.0119564601342689	0.766456169319846	no	-	vacuolar protein sorting 52 [Salmo salar]	-	-	-	-
Unigene0000698	371	422	2.5220	4.7051	3.2602	3.1026	3.8280	4.1499	3.49576666666667	3.6935	0.0793796857409764	0.85044025845674	1	no	-	--	-	-	-	-
Unigene0000699	18.3333333333333	30.6666666666667	1.2618	0.5311	0.9489	1.2015	0.6452	2.3597	0.913933333333333	1.40213333333333	0.617462709186914	0.364176935322413	1	no	-	--	-	-	-	-
Unigene0000700	328	376.333333333333	7.5479	5.9725	7.7887	5.3299	8.4083	9.3607	7.10303333333333	7.69963333333333	0.116354488747393	0.782263341391675	1	no	STK19	PREDICTED: serine/threonine-protein kinase 19 isoform X2 [Sinocyclocheilus grahami]	-	-	-	-
Unigene0000701	8.66666666666667	15	0.1952	0.2849	1.2725	1.1339	0.5047	1.1344	0.5842	0.924333333333333	0.661950852376505	0.461775122670871	1	no	-	--	-	-	-	-
Unigene0000702	108.666666666667	231	0.7396	1.7638	1.2836	2.9556	2.5681	1.9342	1.26233333333333	2.48596666666667	0.977714031497794	0.0417914031488877	1	no	pol	PREDICTED: uncharacterized protein LOC108184914 [Danio rerio]	-	-	-	-
Unigene0000703	26	46.3333333333333	0.5039	1.5511	0.5510	2.1659	0.9769	1.0402	0.868666666666667	1.39433333333333	0.682700914075896	0.288665015051949	1	no	PEG10	Retrotransposable element Tf2 protein type 1 [Larimichthys crocea]	ko03410//Base excision repair//Replication and repair//Genetic Information Processing	-	-	-
Unigene0000704	8	16	0.5177	0.7790	0.3329	1.5427	0.9319	0.5343	0.5432	1.00296666666667	0.884718274461382	0.24169451535118	1	no	-	--	-	-	-	-
Unigene0000705	353.666666666667	338	4.2646	0.7565	7.6920	1.8049	2.4791	7.0403	4.2377	3.77476666666667	-0.166893989965197	0.809820035660634	1	no	efhc2	PREDICTED: EF-hand domain-containing family member C2-like isoform X1 [Sinocyclocheilus rhinocerous]	-	-	GO:0046872//metal ion binding;GO:0005488//binding;GO:0043169//cation binding;GO:0043167//ion binding	-
Unigene0000706	190	253.333333333333	1.8592	2.1785	2.4534	3.0888	2.5444	2.4281	2.1637	2.6871	0.312549530650712	0.460234226162625	1	no	-	--	-	-	-	-
Unigene0000707	29	58	1.1299	0.7189	0.5137	1.7830	0.7860	1.7597	0.7875	1.4429	0.873619488885814	0.133275941121607	1	no	-	--	-	-	-	-
Unigene0000708	25.6666666666667	27.6666666666667	2.0209	2.2118	1.5597	1.6545	2.1589	2.0526	1.9308	1.95533333333333	0.0182158384785568	1	1	no	-	--	-	-	-	-
Unigene0000709	63.6666666666667	52	1.2773	1.9934	1.4605	1.1929	1.3102	1.1067	1.57706666666667	1.20326666666667	-0.39028724137567	0.441349230947974	1	no	-	--	-	-	-	-
Unigene0000710	30.3333333333333	55.6666666666667	0.8548	0.6155	0.6482	0.5982	1.2710	1.7955	0.706166666666667	1.22156666666667	0.790651972460265	0.169399120796119	1	no	-	PREDICTED: protein MAATS1 isoform X1 [Danio rerio]	-	-	GO:0097159//organic cyclic compound binding;GO:0005488//binding	GO:1901360//organic cyclic compound metabolic process;GO:0008152//metabolic process;GO:0006259//DNA metabolic process;GO:0044260//cellular macromolecule metabolic process;GO:0034641//cellular nitrogen compound metabolic process;GO:0071704//organic substance metabolic process;GO:0043170//macromolecule metabolic process;GO:0009987//cellular process;GO:0006725//cellular aromatic compound metabolic p…
Unigene0000711	11	11	0.7206	0.7886	1.5757	0.8259	0.7983	1.2395	1.0283	0.954566666666667	-0.107343359389389	0.949028567693088	1	no	-	--	-	-	-	-
Unigene0000712	3788.66666666667	3846	71.7076	56.8163	71.8645	39.9081	72.9927	79.7930	66.7961333333333	64.2312666666667	-0.0564888437312354	0.878788635786304	1	no	sap30l	PREDICTED: histone deacetylase complex subunit SAP30L [Cyprinus carpio]	-	GO:0043226//organelle;GO:0043231//intracellular membrane-bounded organelle;GO:0044424//intracellular part;GO:0005623//cell;GO:0043227//membrane-bounded organelle;GO:0043229//intracellular organelle;GO:0044464//cell part;GO:0005622//intracellular	GO:0043169//cation binding;GO:0005488//binding;GO:0043167//ion binding	GO:0018130//heterocycle biosynthetic process;GO:0044260//cellular macromolecule metabolic process;GO:0006807//nitrogen compound metabolic process;GO:0044237//cellular metabolic process;GO:1901576//organic substance biosynthetic process;GO:0016070//RNA metabolic process;GO:0044271//cellular nitrogen compound biosynthetic process;GO:0044238//primary metabolic process;GO:0046483//heterocycle metabol…
Unigene0000713	14	17.6666666666667	1.0164	1.7115	0.7241	1.5056	0.9528	1.5064	1.15066666666667	1.3216	0.19981562807428	0.809984077644227	1	no	-	PREDICTED: zinc finger BED domain-containing protein 5-like [Larimichthys crocea]	-	-	-	-
Unigene0000714	40.6666666666667	36.3333333333333	0.9206	0.2996	1.8948	1.0267	0.7994	0.7990	1.03833333333333	0.875033333333333	-0.246859781706258	0.725604709985197	1	no	-	--	-	-	-	-
Unigene0000715	93.3333333333333	117.666666666667	0.9591	2.0690	1.0728	1.8099	1.6015	1.3645	1.36696666666667	1.59196666666667	0.219832064971317	0.663970511615882	1	no	-	--	-	-	-	-
Unigene0000716	28.6666666666667	28.6666666666667	0.5764	1.9767	0.9490	0.6695	0.5960	1.8685	1.16736666666667	1.04466666666667	-0.160215099690364	0.841542015691941	1	no	-	--	-	-	-	-
Unigene0000717	51	87	1.1158	1.5265	1.4091	2.2555	2.0508	2.1171	1.35046666666667	2.14113333333333	0.664916607987366	0.175277725891434	1	no	-	PREDICTED: muscle M-line assembly protein unc-89-like [Sinocyclocheilus rhinocerous]	-	-	-	-
Unigene0000718	46	63.6666666666667	0.7275	1.2406	0.4875	0.7757	1.6306	0.8381	0.818533333333333	1.08146666666667	0.40187612451633	0.489012748550157	1	no	-	--	-	-	-	-
Unigene0000719	528	725.666666666667	2.3118	3.4862	3.8351	4.3785	3.4385	4.4021	3.21103333333333	4.07303333333333	0.343065979697023	0.381580539778151	1	no	-	PREDICTED: uncharacterized protein LOC107591874 [Sinocyclocheilus grahami]	-	-	-	-
Unigene0000720	330.333333333333	425	8.4035	6.6078	12.8736	8.8031	12.9555	12.2755	9.29496666666667	11.3447	0.287496862274652	0.502022734808109	1	no	-	--	-	-	-	-
Unigene0000721	154.666666666667	215.333333333333	1.5800	2.5190	1.9460	3.2969	1.9709	2.4425	2.015	2.5701	0.351044655567608	0.436977050434262	1	no	PEG10	Retrotransposable element Tf2 protein type 1 [Larimichthys crocea]	-	-	-	-
Unigene0000722	27	24.3333333333333	1.6131	1.9067	1.9255	1.3016	3.1452	0.4144	1.8151	1.6204	-0.163699043224462	0.81153563928906	1	no	-	--	-	-	-	-
Unigene0000723	229.666666666667	309.333333333333	7.7826	10.8093	9.8382	12.1718	12.0358	11.4892	9.4767	11.8989333333333	0.328375577697561	0.424467195508055	1	no	-	--	-	-	-	-
Unigene0000724	23	29.6666666666667	0.5607	0.8398	0.7289	1.2178	0.5231	0.7581	0.7098	0.833	0.230903921191965	0.728740542633828	1	no	-	--	-	-	-	-
Unigene0000725	94	133.333333333333	5.2920	5.8510	4.7234	5.8925	7.8969	7.3817	5.2888	7.05703333333333	0.416121404662925	0.361047843694999	1	no	-	--	-	-	-	-
Unigene0000726	28.3333333333333	23.3333333333333	0.8598	0.6613	0.5261	0.5114	0.5664	0.5117	0.6824	0.529833333333333	-0.365079036014109	0.547379717538604	1	no	-	PREDICTED: mucin-19-like [Sinocyclocheilus anshuiensis]	-	-	-	-
Unigene0000727	51.3333333333333	44.6666666666667	0.6458	1.3679	1.3505	0.9933	0.5077	1.1466	1.1214	0.882533333333333	-0.345578299718985	0.552223498266727	1	no	KCNH7	PREDICTED: potassium voltage-gated channel subfamily H member 2-like [Sinocyclocheilus rhinocerous]	-	-	-	-
Unigene0000728	13.6666666666667	31.3333333333333	1.1501	0.3975	0.9967	1.6652	2.1460	1.7771	0.8481	1.86276666666667	1.13514068214981	0.0722838286813879	1	no	-	--	-	-	-	-
Unigene0000729	39.3333333333333	25.3333333333333	1.7666	0.2886	1.1125	0.0242	1.1100	0.8951	1.0559	0.676433333333333	-0.642453549530299	0.480897408429823	1	no	-	--	-	-	-	-
Unigene0000730	1727	2286.66666666667	6.0509	7.4471	7.4777	9.8150	9.3110	6.9124	6.9919	8.67946666666666	0.311921843909066	0.376345640450121	1	no	Map4	PREDICTED: microtubule-associated protein 4-like isoform X3 [Sinocyclocheilus grahami]	-	-	-	-
Unigene0000731	416.666666666667	527	6.7141	7.1302	6.1047	9.7972	7.5231	6.2018	6.64966666666667	7.8407	0.237700437387058	0.546658953584575	1	no	ICOSLG	PREDICTED: CD276 antigen homolog [Sinocyclocheilus anshuiensis]	-	-	-	-
Unigene0000732	45.3333333333333	68.3333333333333	1.9976	3.5775	3.0523	4.6626	5.4320	2.2214	2.8758	4.10533333333333	0.513536020870903	0.349969044277965	1	no	-	PREDICTED: CXADR-like membrane protein [Cyprinus carpio]	-	-	-	-
Unigene0000733	33	30.6666666666667	0.7732	2.8030	1.4918	3.2790	0.4283	0.4433	1.68933333333333	1.38353333333333	-0.288096620680404	0.730861701332612	1	no	-	--	-	-	-	-
Unigene0000734	5.33333333333333	12.6666666666667	0.0000	0.9558	0.1284	0.6292	0.8293	0.8584	0.3614	0.7723	1.09556486517572	0.274322021119885	1	no	-	--	-	-	-	-
Unigene0000735	2	5	0.0000	0.0000	0.3295	0.3425	0.1182	0.2937	0.109833333333333	0.251466666666667	1.19505121077969	0.401454714552448	1	no	-	PREDICTED: zinc finger protein 2-like isoform X1 [Sinocyclocheilus anshuiensis]	-	-	-	-
Unigene0000736	60.3333333333333	45.6666666666667	6.0747	1.3182	2.2634	2.4490	0.9283	3.3630	3.21876666666667	2.24676666666667	-0.518657693259757	0.448186700973688	1	no	-	--	-	-	-	-
Unigene0000737	0	3.33333333333333	0.0000	0.0000	0.0000	0.0000	0.2196	0.0000	0.001	0.0732	6.19377174339668	0.0690777634458316	1	no	-	PREDICTED: E3 ubiquitin-protein ligase RNF213 isoform X3 [Salmo salar]	-	-	-	-
Unigene0000738	86.6666666666667	146.666666666667	0.4953	0.8169	0.5886	1.5672	0.7110	0.6592	0.6336	0.979133333333333	0.627932996567666	0.224085950400484	1	no	Flt3	PREDICTED: receptor-type tyrosine-protein kinase FLT3-like [Sinocyclocheilus grahami]	ko04060//Cytokine-cytokine receptor interaction//Signaling molecules and interaction//Environmental Information Processing	-	-	-
Unigene0000739	957.333333333333	1157.33333333333	4.8514	7.2930	3.5844	6.3641	6.6359	4.7718	5.24293333333333	5.92393333333333	0.176181203598209	0.65855687444573	1	no	CNNM2	PREDICTED: metal transporter CNNM2-like isoform X1 [Sinocyclocheilus grahami]	-	-	-	-
Unigene0000740	2.66666666666667	9.33333333333333	0.0000	0.3319	0.3121	0.0695	1.7639	0.4173	0.214666666666667	0.750233333333333	1.80524117664211	0.13879106014242	1	no	Slc26a4	PREDICTED: pendrin-like [Sinocyclocheilus rhinocerous]	-	GO:0044425//membrane part;GO:0016020//membrane;GO:0031224//intrinsic component of membrane	GO:0022857//transmembrane transporter activity;GO:0005215//transporter activity;GO:0015075//ion transmembrane transporter activity;GO:0022891//substrate-specific transmembrane transporter activity;GO:0022892//substrate-specific transporter activity;GO:0015103//inorganic anion transmembrane transporter activity;GO:0008509//anion transmembrane transporter activity	GO:0048878//chemical homeostasis;GO:0051179//localization;GO:0006811//ion transport;GO:0006820//anion transport;GO:0006950//response to stress;GO:0042592//homeostatic process;GO:0015698//inorganic anion transport;GO:0044763//single-organism cellular process;GO:0065007//biological regulation;GO:0006810//transport;GO:0044699//single-organism process;GO:0009987//cellular process;GO:0009628//response…
Unigene0000741	358	322	3.4915	5.1406	3.0583	3.1063	4.3631	2.4882	3.8968	3.3192	-0.231454325968798	0.591386306635033	1	no	STEAP3	PREDICTED: metalloreductase STEAP3-like [Sinocyclocheilus anshuiensis]	ko04115//p53 signaling pathway//Cell growth and death//Cellular Processes	-	-	-
Unigene0000742	43.6666666666667	91.6666666666667	1.5273	1.6715	1.6447	4.4294	3.1479	1.9225	1.6145	3.1666	0.971847198923644	0.0623828686158723	1	no	-	--	-	-	-	-
Unigene0000743	30	50.6666666666667	1.1045	1.2089	1.0266	1.4049	2.2105	1.7325	1.11333333333333	1.78263333333333	0.679124386132665	0.202831519184273	1	no	-	PREDICTED: mucin-5AC [Danio rerio]	-	-	-	-
Unigene0000744	35.3333333333333	56.6666666666667	0.6978	0.6147	0.5605	0.8740	0.9240	1.0150	0.624333333333333	0.937666666666667	0.586758653071656	0.251954848295047	1	no	-	PREDICTED: mucin-17-like [Cyprinus carpio]	-	-	-	-
Unigene0000745	6.66666666666667	10	0.3909	0.5990	0.6437	1.0038	1.0395	0.2869	0.544533333333333	0.776733333333333	0.512399014720834	0.595400429032944	1	no	-	--	-	-	-	-
Unigene0000746	0.666666666666667	0.666666666666667	0.0000	0.1257	0.0000	0.1053	0.0000	0.0000	0.0419	0.0351	-0.255479213394791	1	1	no	C7orf55	PREDICTED: UPF0562 protein C7orf55 homolog [Danio rerio]	-	-	-	-
Unigene0000747	8.33333333333333	8.33333333333333	0.5060	0.4984	0.3124	0.6032	0.1682	0.4178	0.438933333333333	0.3964	-0.14704487251398	0.875291225483548	1	no	-	--	-	-	-	-
Unigene0000748	6	7	0.4107	0.5244	0.3522	0.1883	0.3791	0.8163	0.4291	0.461233333333333	0.104182879242779	1	1	no	-	--	-	-	-	-
Unigene0000749	28	40.3333333333333	0.7360	0.5790	0.6864	1.0124	0.7390	0.9285	0.667133333333333	0.8933	0.421169634540987	0.43194908469349	1	no	-	PREDICTED: low density lipoprotein receptor adapter protein 1-like isoform X1 [Sinocyclocheilus grahami]	-	-	-	-
Unigene0000750	58	38.3333333333333	3.6029	4.1752	1.8538	2.2349	2.1718	1.5555	3.21063333333333	1.9874	-0.691975643011439	0.213275685645076	1	no	Tuba1b	PREDICTED: tubulin alpha chain-like [Peromyscus maniculatus bairdii]	ko04145//Phagosome//Transport and catabolism//Cellular Processes;ko04540//Gap junction//Cellular commiunity//Cellular Processes	GO:0043227//membrane-bounded organelle;GO:0044464//cell part;GO:0031988//membrane-bounded vesicle;GO:0043226//organelle;GO:0043228//non-membrane-bounded organelle;GO:0044430//cytoskeletal part;GO:0044422//organelle part;GO:0043231//intracellular membrane-bounded organelle;GO:0005623//cell;GO:0031982//vesicle;GO:0099513//polymeric cytoskeletal fiber;GO:0043232//intracellular non-membrane-bounded o…	GO:0001883//purine nucleoside binding;GO:1901363//heterocyclic compound binding;GO:0016817//hydrolase activity, acting on acid anhydrides;GO:0032550//purine ribonucleoside binding;GO:0032549//ribonucleoside binding;GO:0005198//structural molecule activity;GO:0017111//nucleoside-triphosphatase activity;GO:0097367//carbohydrate derivative binding;GO:0016818//hydrolase activity, acting on acid anhyd…	GO:0070670//response to interleukin-4;GO:0009259//ribonucleotide metabolic process;GO:1901565//organonitrogen compound catabolic process;GO:0006725//cellular aromatic compound metabolic process;GO:0009154//purine ribonucleotide catabolic process;GO:1901361//organic cyclic compound catabolic process;GO:0006793//phosphorus metabolic process;GO:1901136//carbohydrate derivative catabolic process;GO:0…
Unigene0000751	3.66666666666667	5	0.3202	0.7008	0.2196	0.7829	0.2365	0.4895	0.413533333333333	0.502966666666667	0.2824591666411	0.903148629911673	1	no	-	--	-	-	-	-
Unigene0000752	53	73.6666666666667	4.2222	3.6797	4.9885	5.3772	5.7170	5.7385	4.2968	5.6109	0.384969574066871	0.436342204113049	1	no	-	--	-	-	-	-
Unigene0000753	16.3333333333333	11.3333333333333	0.9611	0.6762	1.8368	0.9443	0.9887	0.3779	1.15803333333333	0.7703	-0.588184450656388	0.419023682164791	1	no	-	--	-	-	-	-
Unigene0000754	0	0	0.0000	0.0000	0.0000	0.0000	0.0000	0.0000	0.001	0.001	0	notest	notest	notest	-	--	-	-	-	-
Unigene0000755	27.6666666666667	38.3333333333333	1.2824	1.0733	0.8927	0.6226	1.8804	1.7994	1.0828	1.43413333333333	0.40541236693675	0.505050698860261	1	no	-	--	-	-	-	-
Unigene0000756	28.3333333333333	23	1.4975	2.0639	1.3698	1.0172	1.3518	1.3739	1.64373333333333	1.24763333333333	-0.397782263058564	0.50506908745418	1	no	-	--	-	-	-	-
Unigene0000757	8.33333333333333	3.33333333333333	0.6551	0.8066	0.6741	0.0000	0.7257	0.1502	0.711933333333333	0.291966666666667	-1.28593848257212	0.233086192768222	1	no	-	--	-	-	-	-
Unigene0000758	35.3333333333333	38.6666666666667	2.2551	1.1252	0.2389	0.9427	1.6166	1.2474	1.2064	1.2689	0.0728700434276802	0.925271796589013	1	no	-	--	-	-	-	-
Unigene0000759	27.3333333333333	51	1.2510	2.0538	1.5799	2.7114	3.1499	2.6606	1.62823333333333	2.84063333333333	0.802905162368129	0.13203381275129	1	no	-	--	-	-	-	-
Unigene0000760	65.6666666666667	76.3333333333333	1.3094	0.8477	1.5942	1.1331	1.5732	1.4382	1.25043333333333	1.3815	0.143807419652117	0.784564473002253	1	no	NT5C1A	PREDICTED: cytosolic 5'-nucleotidase 1A-like isoform X2 [Latimeria chalumnae]	ko01100//Metabolic pathways//Global and Overview//Metabolism;ko01110//Biosynthesis of secondary metabolites//Global and Overview//Metabolism;ko00230//Purine metabolism//Nucleotide metabolism//Metabolism;ko00240//Pyrimidine metabolism//Nucleotide metabolism//Metabolism;ko00760//Nicotinate and nicotinamide metabolism//Metabolism of cofactors and vitamins//Metabolism	-	-	-
Unigene0000761	8.66666666666667	4.66666666666667	0.9643	0.2483	0.2918	0.3121	0.1257	0.3122	0.501466666666667	0.25	-1.0042257107697	0.291634437219477	1	no	-	--	-	-	-	-
Unigene0000762	29.3333333333333	24	1.7083	1.3031	1.7046	0.7595	0.7455	2.0421	1.572	1.18236666666667	-0.410923714948871	0.529367202888379	1	no	-	--	-	-	-	-
Unigene0000763	14.6666666666667	17.6666666666667	1.2850	0.6697	0.8186	1.0661	0.4067	1.5719	0.924433333333333	1.0149	0.134696396230474	0.85823729139156	1	no	-	--	-	-	-	-
Unigene0000764	207	262.333333333333	4.0169	3.7249	5.0092	5.2257	4.7351	5.1375	4.25033333333333	5.03276666666667	0.243775722586941	0.558301218032456	1	no	-	--	-	-	-	-
Unigene0000765	25.6666666666667	23	1.3336	0.9591	0.7450	0.7686	0.4221	1.2934	1.01256666666667	0.828033333333333	-0.290256145957454	0.67373863733865	1	no	Znf354c	PREDICTED: gastrula zinc finger protein XlCGF49.1-like [Sinocyclocheilus rhinocerous]	-	-	-	-
Unigene0000766	14.3333333333333	13.6666666666667	1.4277	0.9943	0.4675	0.9521	1.0065	0.6549	0.963166666666667	0.871166666666667	-0.14483671061571	0.876933031031695	1	no	-	--	-	-	-	-
Unigene0000767	63	62.3333333333333	1.4470	1.5176	2.9470	1.8797	1.5362	2.0189	1.97053333333333	1.8116	-0.121321709658133	0.823085108178144	1	no	-	--	-	-	-	-
Unigene0000768	12.6666666666667	9.66666666666667	0.0897	0.0982	3.3235	0.7404	1.2921	0.5761	1.17046666666667	0.869533333333333	-0.428770609957384	0.721556411419453	1	no	-	Nipped-B-like B, partial [Nestor notabilis]	-	-	-	-
Unigene0000769	34.6666666666667	45.3333333333333	4.1621	3.3873	3.9536	4.4037	2.0099	7.2452	3.83433333333333	4.55293333333333	0.247820573259155	0.688698809693166	1	no	-	--	-	-	-	-
Unigene0000770	18	15.3333333333333	0.9490	0.9443	0.5327	0.4747	0.4779	0.9498	0.808666666666667	0.634133333333333	-0.350758930262218	0.617015195943281	1	no	-	--	-	-	-	-
Unigene0000771	1.66666666666667	2	0.5049	0.0000	0.0000	0.0926	0.0000	0.4632	0.1683	0.185266666666667	0.138568157149459	1	1	no	-	--	-	-	-	-
Unigene0000772	323.333333333333	347	8.7876	15.1403	10.9857	15.2346	11.7889	7.7785	11.6378666666667	11.6006666666667	-0.00461890607237882	0.994411215941659	1	no	-	PREDICTED: cytochrome c oxidase copper chaperone [Anolis carolinensis]	ko01100//Metabolic pathways//Global and Overview//Metabolism;ko00190//Oxidative phosphorylation//Energy metabolism//Metabolism	-	-	-
Unigene0000773	70.6666666666667	51.3333333333333	0.8773	0.8322	11.0747	7.6695	0.1944	0.4293	4.2614	2.7644	-0.624361093418022	0.587577375200222	1	no	-	--	-	-	-	-
Unigene0000774	22	16.6666666666667	0.5477	1.2323	0.3445	0.6418	0.6068	0.2513	0.708166666666667	0.499966666666667	-0.502257025805567	0.493745329893052	1	no	-	PREDICTED: E3 ubiquitin-protein ligase CBL-like [Sinocyclocheilus anshuiensis]	-	GO:0005623//cell;GO:0005622//intracellular;GO:0043227//membrane-bounded organelle;GO:0043231//intracellular membrane-bounded organelle;GO:0044464//cell part;GO:0044424//intracellular part;GO:0043229//intracellular organelle;GO:0043226//organelle	GO:0019787//ubiquitin-like protein transferase activity;GO:0045309//protein phosphorylated amino acid binding;GO:0043167//ion binding;GO:0043169//cation binding;GO:0005515//protein binding;GO:0005488//binding;GO:0016740//transferase activity;GO:0046914//transition metal ion binding;GO:0046872//metal ion binding;GO:0003824//catalytic activity;GO:0051219//phosphoprotein binding	GO:0009987//cellular process;GO:0051716//cellular response to stimulus;GO:0050794//regulation of cellular process;GO:0044700//single organism signaling;GO:0044763//single-organism cellular process;GO:0065007//biological regulation;GO:0007165//signal transduction;GO:0050789//regulation of biological process;GO:0044699//single-organism process;GO:0050896//response to stimulus;GO:0023052//signaling;…
Unigene0000775	20.6666666666667	11.6666666666667	2.1792	0.3975	0.2803	1.0824	0.0000	0.3749	0.952333333333333	0.485766666666667	-0.971203134877214	0.372568248003425	1	no	-	--	-	-	-	-
Unigene0000776	99	145.666666666667	0.5558	1.5501	0.7103	1.3645	1.5294	0.9622	0.938733333333333	1.28536666666667	0.453392670900055	0.386587603418515	1	no	SLC5A5	PREDICTED: sodium/iodide cotransporter [Sinocyclocheilus grahami]	-	GO:0044425//membrane part;GO:0016020//membrane;GO:0031224//intrinsic component of membrane	-	GO:0044699//single-organism process;GO:0009987//cellular process;GO:0044763//single-organism cellular process
Unigene0000777	685	933.333333333333	16.6006	23.0978	16.5710	25.1625	25.4980	20.9710	18.7564666666667	23.8771666666667	0.348243573097589	0.354359717323728	1	no	LAMP1	--	ko04145//Phagosome//Transport and catabolism//Cellular Processes;ko04142//Lysosome//Transport and catabolism//Cellular Processes	-	-	-
Unigene0000778	1773.66666666667	2495.66666666667	18.0195	30.1355	20.6105	29.0346	37.7412	24.3563	22.9218333333333	30.3773666666667	0.406274373556611	0.274528134427872	1	no	LAMP1	PREDICTED: lysosome-associated membrane glycoprotein 1-like [Sinocyclocheilus anshuiensis]	ko04145//Phagosome//Transport and catabolism//Cellular Processes;ko04142//Lysosome//Transport and catabolism//Cellular Processes	-	-	-
Unigene0000779	8.66666666666667	24.6666666666667	0.7175	0.3624	0.3976	1.7713	1.2840	0.9114	0.4925	1.32223333333333	1.42478116073341	0.0378023965694904	1	no	-	--	-	-	-	-
Unigene0000780	1.66666666666667	4	0.1569	0.1717	0.0807	0.5756	0.2608	0.0720	0.136433333333333	0.3028	1.15016903926381	0.334767757719756	1	no	zgc:103499	--	-	-	-	-
Unigene0000781	74.6666666666667	178.333333333333	7.7841	3.6511	9.9175	4.3337	10.6768	32.3058	7.11756666666667	15.7721	1.14791875657865	0.0884931722362358	1	no	-	--	-	-	-	-
Unigene0000782	1319	1562.33333333333	25.8378	28.2583	21.9389	22.9147	33.7733	28.4079	25.345	28.3653	0.162425958541639	0.653684566740329	1	no	zgc:162885	PREDICTED: mitochondrial inner membrane protease ATP23 homolog isoform X1 [Sinocyclocheilus grahami]	-	-	GO:0008233//peptidase activity;GO:0070011//peptidase activity, acting on L-amino acid peptides;GO:0043169//cation binding;GO:0004175//endopeptidase activity;GO:0005488//binding;GO:0016787//hydrolase activity;GO:0003824//catalytic activity;GO:0043167//ion binding	GO:0010467//gene expression;GO:0071704//organic substance metabolic process;GO:0043170//macromolecule metabolic process;GO:0008152//metabolic process;GO:0044238//primary metabolic process;GO:0006508//proteolysis;GO:0016485//protein processing;GO:0051604//protein maturation;GO:0019538//protein metabolic process
Unigene0000783	920.666666666667	1078	5.9549	5.8999	4.2022	6.4031	5.9907	5.2070	5.35233333333333	5.86693333333333	0.132438631453176	0.721298927358089	1	no	PACS2	PREDICTED: phosphofurin acidic cluster sorting protein 2-like isoform X2 [Sinocyclocheilus anshuiensis]	-	-	-	-
Unigene0000784	5	9	0.3743	0.4779	0.1284	0.4004	0.6910	0.5723	0.326866666666667	0.554566666666667	0.76265864202393	0.420485568493154	1	no	-	--	-	-	-	-
Unigene0000785	16.6666666666667	20.3333333333333	0.4755	0.6691	0.6291	0.4672	0.5644	0.9659	0.591233333333333	0.665833333333333	0.171433487376946	0.830182814731794	1	no	-	--	-	-	-	-
Unigene0000786	35	38.6666666666667	1.4766	1.2855	0.8979	1.3848	1.2269	1.1699	1.22	1.26053333333333	0.0471531212998786	0.940807205760533	1	no	-	PREDICTED: S-antigen protein-like [Cavia porcellus]	-	-	-	-
Unigene0000787	95.6666666666667	102.333333333333	4.4765	4.4045	4.6066	5.4317	5.6606	2.6135	4.49586666666667	4.5686	0.023152883728871	0.968505181413104	1	no	-	--	-	-	-	-
Unigene0000788	33.3333333333333	50	0.4909	2.6190	0.1894	2.5881	1.4615	0.4222	1.09976666666667	1.4906	0.438695699704773	0.61471393520162	1	no	-	PREDICTED: homeobox expressed in ES cells 1-A-like [Sinocyclocheilus anshuiensis]	-	-	-	-
Unigene0000789	2.66666666666667	5.33333333333333	0.1088	0.0595	0.2799	0.1995	0.1205	0.4990	0.1494	0.273	0.869720803017978	0.444657024302459	1	no	-	PREDICTED: IgGFc-binding protein-like [Cyprinus carpio]	-	-	-	-
Unigene0000790	62.3333333333333	119.333333333333	0.9940	1.3252	1.2088	1.5578	1.9421	2.7689	1.176	2.0896	0.829338741822704	0.0912306486086831	1	no	pol	PREDICTED: uncharacterized protein LOC109098236 [Cyprinus carpio]	-	-	-	-
Unigene0000791	1124	1754	4.7632	5.3926	5.8294	4.8479	9.5499	9.2244	5.3284	7.87406666666667	0.563406538505511	0.146056899887789	1	no	pol	PREDICTED: uncharacterized protein LOC109070003 [Cyprinus carpio]	-	-	-	-
Unigene0000792	39	79.3333333333333	0.7379	0.3317	0.5152	0.7974	1.8539	0.5440	0.528266666666667	1.0651	1.01165060379589	0.0936871268513589	1	no	inaW	PREDICTED: extensin-1-like [Nannospalax galili]	-	-	-	-
Unigene0000793	11.6666666666667	16.6666666666667	1.5869	0.6616	0.4666	0.5543	2.0091	1.2478	0.905033333333333	1.2704	0.489239983324712	0.549205312672798	1	no	-	--	-	-	-	-
Unigene0000794	48.6666666666667	47.3333333333333	1.6798	3.4782	1.8220	1.8317	3.3195	1.3328	2.32666666666667	2.16133333333333	-0.106342945579477	0.863072245324938	1	no	hba1	PREDICTED: hemoglobin embryonic subunit alpha-like [Sinocyclocheilus rhinocerous]	-	GO:0032991//macromolecular complex;GO:0043234//protein complex	GO:0022892//substrate-specific transporter activity;GO:0005215//transporter activity;GO:0046906//tetrapyrrole binding;GO:0046872//metal ion binding;GO:0043167//ion binding;GO:1901363//heterocyclic compound binding;GO:0005488//binding;GO:0097159//organic cyclic compound binding;GO:0046914//transition metal ion binding;GO:0043169//cation binding	GO:1902578//single-organism localization;GO:0044765//single-organism transport;GO:0051234//establishment of localization;GO:0006810//transport;GO:0015669//gas transport;GO:0044699//single-organism process;GO:0051179//localization
Unigene0000795	561	642	7.3916	8.9769	7.7477	8.6802	10.0153	7.2980	8.03873333333333	8.6645	0.108148305333437	0.776333966733481	1	no	-	--	-	-	-	-
Unigene0000796	0.666666666666667	1.66666666666667	0.0000	0.0000	0.2024	0.0000	0.4358	0.0902	0.0674666666666667	0.175333333333333	1.37785350948535	0.610496461532443	1	no	-	--	-	-	-	-
Unigene0000797	170	286.666666666667	1.6501	1.6863	1.5011	3.3773	2.1210	2.0575	1.6125	2.5186	0.643322853223745	0.137237756771787	1	no	-	--	-	-	-	-
Unigene0000798	211.666666666667	152.666666666667	5.9986	4.9840	9.6633	3.5710	6.0193	4.6389	6.88196666666667	4.74306666666667	-0.537000757777651	0.249012556183334	1	no	-	PREDICTED: uncharacterized protein LOC109201215 isoform X3 [Oreochromis niloticus]	-	-	-	-
Unigene0000799	467.666666666667	526	2.6554	3.6722	2.8355	4.0678	2.7550	2.6941	3.05436666666667	3.1723	0.0546559478344967	0.892339173387815	1	no	abhd11	PREDICTED: protein ABHD11 isoform X1 [Sinocyclocheilus anshuiensis]	-	-	-	-
Unigene0000800	56	68.6666666666667	0.8029	0.5300	0.8786	0.6077	0.7200	1.2042	0.737166666666667	0.843966666666667	0.195195182927363	0.718521675506382	1	no	-	pol-like protein [Danio rerio]	-	-	-	-
Unigene0000801	27.6666666666667	26.6666666666667	1.2140	0.5572	1.5717	1.0055	0.7376	1.2575	1.1143	1.0002	-0.155849187730862	0.811610575696893	1	no	-	--	-	-	-	-
Unigene0000802	2	3	0.0896	0.0000	0.0922	0.0274	0.2647	0.0000	0.0606	0.0973666666666667	0.684110158635072	0.703786837499273	1	no	-	PREDICTED: zonadhesin-like [Sinocyclocheilus grahami]	-	-	-	-
Unigene0000803	0	0.666666666666667	0.0000	0.0000	0.0000	0.1173	0.0000	0.0000	0.001	0.0391	5.28909670241999	0.556433359814155	1	no	-	PREDICTED: zonadhesin-like [Sinocyclocheilus grahami]	-	-	-	-
Unigene0000804	0	0	0.0000	0.0000	0.0000	0.0000	0.0000	0.0000	0.001	0.001	0	notest	notest	notest	-	PREDICTED: zonadhesin-like [Sinocyclocheilus grahami]	-	-	-	-
Unigene0000805	0	2.66666666666667	0.0000	0.0000	0.0000	0.2419	0.0000	0.0000	0.001	0.0806333333333333	6.33330445837141	0.120683884865309	1	no	-	PREDICTED: zonadhesin-like [Sinocyclocheilus grahami]	-	-	-	-
Unigene0000806	2250.66666666667	2236.66666666667	9.3888	7.9017	10.4111	9.1066	7.7441	8.8423	9.23386666666667	8.56433333333333	-0.108593952495465	0.751765337023168	1	no	C2CD2	PREDICTED: C2 domain-containing protein 2-like isoform X2 [Sinocyclocheilus rhinocerous]	-	-	-	-
Unigene0000807	42.3333333333333	67.6666666666667	2.1662	1.9297	2.5402	3.1874	3.0695	3.6511	2.21203333333333	3.30266666666667	0.57825824202271	0.253487424920312	1	no	-	--	-	-	-	-
Unigene0000808	14.6666666666667	19.6666666666667	0.5384	0.4160	0.4889	0.4356	0.6316	0.7555	0.4811	0.607566666666667	0.336705921055372	0.605380424255657	1	no	-	PREDICTED: scavenger receptor cysteine-rich type 1 protein M130-like [Sinocyclocheilus grahami]	-	-	-	-
Unigene0000809	16	23.6666666666667	0.5843	0.6395	1.0176	0.7007	0.6971	1.6494	0.747133333333333	1.01573333333333	0.443084057989475	0.534152060381692	1	no	-	reverse transcriptase [Danio rerio]	-	-	-	-
Unigene0000810	3756.33333333333	4882.66666666667	8.8520	12.5231	8.8271	13.1118	13.6045	10.0461	10.0674	12.2541333333333	0.283577312028787	0.412934499045131	1	no	NAV2	PREDICTED: neuron navigator 2-like [Sinocyclocheilus anshuiensis]	-	-	-	-
Unigene0000811	53.3333333333333	51.6666666666667	1.7249	1.2700	2.1946	0.9203	1.3898	2.3881	1.72983333333333	1.56606666666667	-0.143487414469939	0.814768029102266	1	no	rpl36	PREDICTED: 60S ribosomal protein L36 [Astyanax mexicanus]	ko03010//Ribosome//Translation//Genetic Information Processing	GO:0030529//intracellular ribonucleoprotein complex;GO:0032991//macromolecular complex;GO:1990904//ribonucleoprotein complex;GO:0005623//cell;GO:0044424//intracellular part;GO:0044464//cell part;GO:0005622//intracellular	-	GO:0048856//anatomical structure development;GO:0048731//system development;GO:0007399//nervous system development;GO:0071704//organic substance metabolic process;GO:0007049//cell cycle;GO:0044707//single-multicellular organism process;GO:0007417//central nervous system development;GO:0009987//cellular process;GO:0032501//multicellular organismal process;GO:0007275//multicellular organism develop…
Unigene0000812	7807.66666666667	7562	46.7524	38.7728	55.6475	27.3537	45.9110	55.6841	47.0575666666667	42.9829333333333	-0.130662779534254	0.72147099909017	1	no	Ttll4	tubulin polyglutamylase TTLL4 [Chanodichthys ilishaeformis]	-	-	-	GO:0043412//macromolecule modification;GO:0036211//protein modification process;GO:0043170//macromolecule metabolic process;GO:0044238//primary metabolic process;GO:0019538//protein metabolic process;GO:0071704//organic substance metabolic process;GO:0008152//metabolic process
Unigene0000813	5	4	0.1222	0.3678	0.0000	0.0841	0.1015	0.1682	0.163333333333333	0.117933333333333	-0.469847701199476	0.692714201270986	1	no	-	--	-	-	-	-
Unigene0000814	5.33333333333333	4.33333333333333	0.3597	0.7086	0.1481	0.4618	0.0797	0.3300	0.405466666666667	0.2905	-0.481045152017752	0.672011411942693	1	no	-	--	-	-	-	-
Unigene0000815	16.3333333333333	20.6666666666667	0.4021	0.7042	0.9517	0.7743	0.8464	0.8116	0.686	0.810766666666667	0.241078199600546	0.73234663247145	1	no	-	PREDICTED: uncharacterized protein LOC108180325 [Danio rerio]	-	-	-	-
Unigene0000816	20.6666666666667	15.6666666666667	0.1079	0.9445	0.7215	0.4204	0.8365	0.0495	0.5913	0.435466666666667	-0.441327986924102	0.645576867709874	1	no	-	PREDICTED: LOW QUALITY PROTEIN: tetra-peptide repeat homeobox protein 1-like [Coturnix japonica]	-	-	-	-
Unigene0000817	17	19.3333333333333	1.2052	1.5967	0.5875	1.9776	0.9838	0.5819	1.1298	1.1811	0.0640637125448131	0.96879774318018	1	no	-	--	-	-	-	-
Unigene0000818	60	82	0.7166	2.2578	1.1620	2.7080	0.7698	1.5539	1.3788	1.67723333333333	0.282670203883616	0.64836429466749	1	no	nadX	PREDICTED: putative L-aspartate dehydrogenase isoform X1 [Cyprinus carpio]	-	-	GO:0000166//nucleotide binding;GO:0016638//oxidoreductase activity, acting on the CH-NH2 group of donors;GO:0097159//organic cyclic compound binding;GO:0036094//small molecule binding;GO:0016491//oxidoreductase activity;GO:1901265//nucleoside phosphate binding;GO:1901363//heterocyclic compound binding;GO:0003824//catalytic activity;GO:0005488//binding	GO:0046496//nicotinamide nucleotide metabolic process;GO:1901564//organonitrogen compound metabolic process;GO:0008152//metabolic process;GO:0009165//nucleotide biosynthetic process;GO:1901362//organic cyclic compound biosynthetic process;GO:0018130//heterocycle biosynthetic process;GO:0006739//NADP metabolic process;GO:0090407//organophosphate biosynthetic process;GO:0019359//nicotinamide nucleo…
Unigene0000819	120.333333333333	99.3333333333333	0.6504	3.9296	0.4685	0.9543	1.2971	1.5276	1.68283333333333	1.25966666666667	-0.417850282332403	0.551764599182969	1	no	CDHR5	PREDICTED: cadherin-related family member 5-like [Sinocyclocheilus anshuiensis]	-	-	-	-
Unigene0000820	52.6666666666667	49.3333333333333	1.1305	1.8058	2.1066	1.7090	1.7263	1.0091	1.68096666666667	1.48146666666667	-0.182264950715978	0.736496009414998	1	no	-	--	-	-	-	-
Unigene0000821	30.3333333333333	72.3333333333333	1.7778	2.7384	1.7617	3.5018	3.5013	6.7050	2.09263333333333	4.56936666666667	1.12667466772625	0.0418753723017823	1	no	-	--	-	-	-	-
Unigene0000822	429	533.666666666667	2.4342	2.7501	2.9090	3.9768	3.4864	2.0060	2.69776666666667	3.1564	0.226514471728002	0.582882878335143	1	no	NCAM2	PREDICTED: neural cell adhesion molecule 2-like [Sinocyclocheilus rhinocerous]	ko04514//Cell adhesion molecules (CAMs)//Signaling molecules and interaction//Environmental Information Processing	-	-	-
Unigene0000823	146.666666666667	192.666666666667	2.2405	3.1984	2.0382	3.1859	2.7339	3.1576	2.49236666666667	3.0258	0.279800303831128	0.527360822256438	1	no	tmem120a	PREDICTED: transmembrane protein 120A-like [Sinocyclocheilus grahami]	-	-	-	-
Unigene0000824	340.333333333333	500.666666666667	3.6376	4.8833	3.2118	5.6837	4.4805	5.7469	3.9109	5.3037	0.439498525282286	0.272872747438696	1	no	Trim35	PREDICTED: tripartite motif-containing protein 35-like isoform X1 [Sinocyclocheilus anshuiensis]	-	-	-	-
Unigene0000825	52.3333333333333	74.3333333333333	1.2485	1.7569	0.6653	1.6560	1.5561	1.6159	1.22356666666667	1.60933333333333	0.39537046582276	0.454963249170772	1	no	-	--	-	-	-	-
Unigene0000826	0	0.666666666666667	0.0000	0.0000	0.0000	0.0000	0.1008	0.0000	0.001	0.0336	5.0703893278914	0.558344173775015	1	no	-	--	-	-	-	-
Unigene0000827	125.666666666667	172.666666666667	2.5836	4.4356	2.9976	5.0170	4.7144	3.1139	3.33893333333333	4.28176666666667	0.358818890537503	0.442035943364159	1	no	-	--	-	-	-	-
Unigene0000828	6.66666666666667	8.66666666666667	0.3843	0.9252	0.3163	0.5638	1.1920	0.2820	0.541933333333333	0.679266666666667	0.325862671828584	0.765360994079845	1	no	-	--	-	-	-	-
Unigene0000829	37.3333333333333	48.6666666666667	0.8965	1.3564	0.8412	0.9188	1.6066	1.2821	1.03136666666667	1.26916666666667	0.299324211880143	0.58599264257036	1	no	SPOCK2	PREDICTED: testican-2-like isoform X2 [Sinocyclocheilus anshuiensis]	-	-	-	-
Unigene0000830	3.33333333333333	0.666666666666667	0.0848	0.1392	0.0000	0.0389	0.0000	0.0000	0.0746666666666667	0.0129666666666667	-2.52565667195877	0.205136709487653	1	no	FAM19A4	PREDICTED: protein FAM19A4-like isoform X1 [Sinocyclocheilus anshuiensis]	-	-	-	-
Unigene0000831	396.333333333333	469.333333333333	1.5419	1.9709	1.2885	1.4529	2.2048	1.7124	1.60043333333333	1.79003333333333	0.161523870951072	0.691216885843851	1	no	RYR3	PREDICTED: ryanodine receptor 3-like [Sinocyclocheilus anshuiensis]	ko04020//Calcium signaling pathway//Signal transduction//Environmental Information Processing	-	-	-
Unigene0000832	38.3333333333333	40.6666666666667	3.3619	3.0546	1.1749	3.8971	1.9676	1.5712	2.53046666666667	2.47863333333333	-0.0298586022249249	0.967785090956931	1	no	-	--	-	-	-	-
Unigene0000833	30513.3333333333	29707	178.1635	132.2740	206.6477	121.8888	157.2911	194.2392	172.361733333333	157.806366666667	-0.127284100136985	0.714506526900595	1	no	Caprin1	PREDICTED: caprin-1-like isoform X1 [Sinocyclocheilus rhinocerous]	-	-	-	-
Unigene0000834	8	5.33333333333333	0.1472	0.2416	1.4388	0.3374	0.2446	0.5401	0.6092	0.374033333333333	-0.703749094996297	0.492488823807017	1	no	-	--	-	-	-	-
Unigene0000835	1319.66666666667	1743	3.6866	4.1201	4.5334	4.6163	5.8693	4.8879	4.11336666666667	5.1245	0.317091567202097	0.368281975255616	1	no	PTPRZ1	PREDICTED: receptor-type tyrosine-protein phosphatase zeta-like [Sinocyclocheilus anshuiensis]	-	-	-	-
Unigene0000836	6.33333333333333	0.666666666666667	0.2314	0.8440	0.4761	0.0707	0.0854	0.0000	0.517166666666667	0.0520333333333333	-3.31312125443817	0.0106843787582324	0.732609112521513	no	-	--	-	-	-	-
Unigene0000837	5.33333333333333	5	0.0000	0.0835	1.1783	0.7000	0.0846	0.2801	0.4206	0.3549	-0.245036275670835	0.939378303611123	1	no	-	--	-	-	-	-
Unigene0000838	19.3333333333333	10.3333333333333	0.8510	1.5761	1.5493	0.9004	0.5802	0.4804	1.32546666666667	0.653666666666667	-1.01987335441597	0.137356474658807	1	no	-	--	-	-	-	-
Unigene0000839	8.66666666666667	5.66666666666667	1.1075	1.2121	0.1899	0.0000	1.1247	0.5080	0.8365	0.544233333333333	-0.62014021843907	0.559295654402782	1	no	-	--	-	-	-	-
Unigene0000840	1386	1513.66666666667	5.7768	7.8795	6.0332	7.5781	7.4690	5.1086	6.56316666666667	6.71856666666667	0.033761412771448	0.92755630834781	1	no	CCNT1	PREDICTED: cyclin-T1-like isoform X1 [Sinocyclocheilus grahami]	-	-	-	GO:0065007//biological regulation;GO:0006807//nitrogen compound metabolic process;GO:0006725//cellular aromatic compound metabolic process;GO:0034654//nucleobase-containing compound biosynthetic process;GO:0046483//heterocycle metabolic process;GO:0010467//gene expression;GO:1901360//organic cyclic compound metabolic process;GO:0071704//organic substance metabolic process;GO:0006139//nucleobase-c…
Unigene0000841	10.6666666666667	28	0.4510	0.1974	0.3403	1.2681	0.2998	0.7999	0.329566666666667	0.789266666666667	1.25994248922566	0.0836907394454685	1	no	-	--	-	-	-	-
Unigene0000842	25.3333333333333	34	0.9403	0.2375	0.6947	0.5085	0.3472	1.4598	0.624166666666667	0.771833333333333	0.306358038357579	0.684288293539818	1	no	-	--	-	-	-	-
Unigene0000843	4.66666666666667	1	1.0760	0.0000	0.0000	0.0000	0.0000	0.2115	0.358666666666667	0.0705	-2.34694850943668	0.308066505562021	1	no	-	--	-	-	-	-
Unigene0000844	304	254	3.1308	2.7455	3.3218	2.4251	2.9406	1.9356	3.06603333333333	2.43376666666667	-0.333182523096136	0.422860857188172	1	no	Igsf5	PREDICTED: immunoglobulin superfamily member 5-like [Sinocyclocheilus rhinocerous]	ko04530//Tight junction//Cellular commiunity//Cellular Processes	-	-	-
Unigene0000845	507	575	4.9134	3.5469	7.9716	4.1892	3.9957	9.0442	5.4773	5.74303333333333	0.0683480342246023	0.884610132150308	1	no	-	--	-	-	-	-
Unigene0000846	15.6666666666667	29.6666666666667	0.3785	1.1908	0.7789	0.9543	1.7295	1.4756	0.782733333333333	1.38646666666667	0.824820141987533	0.200446842435915	1	no	-	PREDICTED: astrotactin-2-like [Sinocyclocheilus grahami]	-	-	-	-
Unigene0000847	100.333333333333	127	1.3827	2.0538	1.0163	3.1309	1.1567	0.8414	1.48426666666667	1.70966666666667	0.203964757533072	0.724071971874509	1	no	zgc:171711	PREDICTED: repressor of yield of DENV protein homolog [Sinocyclocheilus rhinocerous]	-	-	-	-
Unigene0000848	314.333333333333	409	1.4331	2.6391	2.0903	2.9596	2.2986	2.1493	2.05416666666667	2.46916666666667	0.265470979696008	0.527809182924669	1	no	-	PREDICTED: titin-like [Sinocyclocheilus anshuiensis]	-	-	-	-
Unigene0000849	1.66666666666667	3	0.2047	0.1120	0.2107	0.3754	0.0000	0.4695	0.1758	0.281633333333333	0.679883026948064	0.705436592124351	1	no	-	--	-	-	-	-
Unigene0000850	0.666666666666667	2.33333333333333	0.0000	0.0000	0.1028	0.0458	0.3319	0.0000	0.0342666666666667	0.1259	1.87740051924629	0.414285188308805	1	no	-	--	-	-	-	-
Unigene0000851	5	4	0.3464	0.4333	0.0000	0.1815	0.3290	0.0908	0.2599	0.200433333333333	-0.374834175997292	0.770862662061766	1	no	-	--	-	-	-	-
Unigene0000852	24.3333333333333	31.3333333333333	0.4025	0.6387	0.4970	1.3840	0.1115	0.2585	0.512733333333333	0.584666666666667	0.189405650042635	0.821502703151183	1	no	-	PREDICTED: interleukin-15 receptor subunit alpha isoform X1 [Sinocyclocheilus rhinocerous]	ko04060//Cytokine-cytokine receptor interaction//Signaling molecules and interaction//Environmental Information Processing;ko04630//Jak-STAT signaling pathway//Signal transduction//Environmental Information Processing;ko04672//Intestinal immune network for IgA production//Immune system//Organismal Systems	-	-	-
Unigene0000853	2191.66666666667	2324	15.7542	16.3387	9.8052	12.0291	14.7229	14.8909	13.9660333333333	13.8809666666667	-0.00881428088434492	0.98096627359556	1	no	Sapcd2	suppressor APC domain-containing protein 2 [Danio rerio]	-	-	-	-
Unigene0000854	26146.6666666667	22340	188.2007	163.1617	126.1427	109.9735	153.3054	123.4845	159.168366666667	128.921133333333	-0.304064865074646	0.36916625213814	1	no	cct3	PREDICTED: T-complex protein 1 subunit gamma-like [Sinocyclocheilus grahami]	-	GO:0044464//cell part;GO:0005623//cell;GO:0005622//intracellular;GO:0044424//intracellular part	GO:0005515//protein binding;GO:0001883//purine nucleoside binding;GO:0005488//binding;GO:0032549//ribonucleoside binding;GO:0036094//small molecule binding;GO:0097367//carbohydrate derivative binding;GO:0032550//purine ribonucleoside binding;GO:1901363//heterocyclic compound binding;GO:0001882//nucleoside binding;GO:0097159//organic cyclic compound binding	GO:0050789//regulation of biological process;GO:0044238//primary metabolic process;GO:0010941//regulation of cell death;GO:0065007//biological regulation;GO:0043170//macromolecule metabolic process;GO:0043067//regulation of programmed cell death;GO:0044699//single-organism process;GO:0009987//cellular process;GO:0008152//metabolic process;GO:0048731//system development;GO:0044707//single-multicel…
Unigene0000855	25	29.3333333333333	1.0188	0.9612	0.7592	1.1275	0.6616	1.1602	0.913066666666667	0.9831	0.106617972583925	0.872918945903553	1	no	-	PREDICTED: trichohyalin-like [Sinocyclocheilus rhinocerous]	-	-	-	-
Unigene0000856	1312.66666666667	1976.33333333333	43.5191	71.0297	28.1761	68.2068	73.1214	58.7809	47.5749666666667	66.7030333333333	0.487549724060073	0.227499649022087	1	no	Tmsb4x	thymosin beta a [Cyprinus carpio]	ko04810//Regulation of actin cytoskeleton//Cell motility//Cellular Processes	GO:0005622//intracellular;GO:0044464//cell part;GO:0005623//cell;GO:0044424//intracellular part	GO:0005488//binding;GO:0008092//cytoskeletal protein binding;GO:0005515//protein binding	GO:0030837//negative regulation of actin filament polymerization;GO:0031333//negative regulation of protein complex assembly;GO:0032956//regulation of actin cytoskeleton organization;GO:0032271//regulation of protein polymerization;GO:0030832//regulation of actin filament length;GO:0051493//regulation of cytoskeleton organization;GO:0065007//biological regulation;GO:0071840//cellular component or…
Unigene0000857	10.6666666666667	15.3333333333333	0.4400	0.2189	0.6585	0.4768	0.3545	0.9174	0.439133333333333	0.5829	0.408589352241517	0.593648683809166	1	no	MOG	PREDICTED: butyrophilin subfamily 1 member A1-like [Cyprinus carpio]	-	-	-	-
Unigene0000858	1561	1413.33333333333	14.4315	10.4809	13.2774	9.8509	11.2291	11.5044	12.7299333333333	10.8614666666667	-0.229005934768457	0.519027137821983	1	no	HNRNPUL1	PREDICTED: heterogeneous nuclear ribonucleoprotein U-like protein 2 isoform X1 [Sinocyclocheilus rhinocerous]	-	-	-	-
Unigene0000859	0.666666666666667	1.66666666666667	0.1112	0.0000	0.0000	0.0510	0.1232	0.1020	0.0370666666666667	0.0920666666666667	1.31255653153454	0.558294581772363	1	no	-	--	-	-	-	-
Unigene0000860	129	131.333333333333	4.0025	5.8408	3.3486	4.4162	5.0471	3.1645	4.3973	4.20926666666667	-0.0630490512735315	0.900396360148504	1	no	-	--	-	-	-	-
Unigene0000861	38	56.6666666666667	0.1883	0.4350	0.6242	0.1343	0.1622	1.3625	0.415833333333333	0.553	0.411274070731242	0.612912475636467	1	no	-	--	-	-	-	-
Unigene0000862	117.666666666667	80	2.4664	3.7521	2.8934	2.2842	2.1859	1.3350	3.0373	1.93503333333333	-0.650430994541524	0.180371101518529	1	no	-	--	-	-	-	-
Unigene0000863	33.3333333333333	8.66666666666667	1.0822	1.0478	0.0428	0.1718	0.2075	0.1527	0.724266666666667	0.177333333333333	-2.03005723385618	0.0219786506858807	0.949184107293543	no	-	--	-	-	-	-
Unigene0000864	1334	1669	14.5437	17.8013	13.1614	19.0203	18.2364	15.9113	15.1688	17.7226666666667	0.224488738568586	0.526821652101501	1	no	ZFAND5	PREDICTED: AN1-type zinc finger protein 5-like isoform X1 [Sinocyclocheilus anshuiensis]	-	-	GO:0043167//ion binding;GO:0046914//transition metal ion binding;GO:0005488//binding;GO:0046872//metal ion binding;GO:0043169//cation binding	-
Unigene0000865	12.6666666666667	14	0.3311	0.6796	0.6389	0.6832	0.5044	0.4937	0.549866666666667	0.560433333333333	0.0274609346413402	0.999999999999997	1	no	-	--	-	-	-	-
Unigene0000866	193	205	3.1275	2.8860	1.3757	2.5080	2.8670	2.0366	2.46306666666667	2.47053333333333	0.00436684416912621	1	1	no	-	--	-	-	-	-
Unigene0000867	20.6666666666667	32.6666666666667	0.4440	0.2429	0.8883	0.5202	0.4372	1.3350	0.525066666666667	0.764133333333333	0.54132378501425	0.439644915327861	1	no	-	--	-	-	-	-
Unigene0000868	149.666666666667	121.333333333333	1.3616	1.6256	1.4697	1.0826	0.9072	1.3452	1.48563333333333	1.11166666666667	-0.418353829982124	0.352305538627558	1	no	-	PREDICTED: uncharacterized protein LOC103909920 [Danio rerio]	-	-	-	-
Unigene0000869	37.3333333333333	70.3333333333333	0.4826	1.0565	0.2483	1.6320	0.6851	0.7195	0.5958	1.0122	0.764594350759192	0.234137635804084	1	no	Sowahc	PREDICTED: ankyrin repeat domain-containing protein SOWAHD-like [Sinocyclocheilus rhinocerous]	-	-	-	-
Unigene0000870	2.66666666666667	1	0.1831	0.0668	0.2512	0.0560	0.0676	0.0560	0.167033333333333	0.0598666666666667	-1.48031118768843	0.351468615318088	1	no	-	--	-	-	-	-
Unigene0000871	16.6666666666667	10.6666666666667	0.9007	0.3286	3.9136	0.5506	0.8870	1.6527	1.7143	1.0301	-0.734835202982894	0.431917639919152	1	no	-	--	-	-	-	-
Unigene0000872	40	44	2.3948	0.5097	1.1638	1.6165	0.7738	1.7699	1.3561	1.38673333333333	0.0322268183254684	0.970602319325683	1	no	-	--	-	-	-	-
Unigene0000873	222	283.666666666667	2.3745	3.3412	3.3564	3.1942	3.8013	3.8421	3.02403333333333	3.61253333333333	0.256536857422415	0.540434396927502	1	no	-	PREDICTED: LOW QUALITY PROTEIN: scavenger receptor cysteine-rich domain-containing group B protein-like [Chrysemys picta bellii]	-	-	-	-
Unigene0000874	881	950.666666666667	11.8843	10.8725	8.7472	8.9621	10.7260	12.1658	10.5013333333333	10.6179666666667	0.0159350018502762	0.966921307170011	1	no	-	--	-	-	-	-
Unigene0000875	5726.33333333333	10124.3333333333	148.9427	172.7344	74.9752	363.5085	154.7244	123.9524	132.217433333333	214.061766666667	0.69511472678089	0.127094980604614	1	no	tmsb	PREDICTED: thymosin beta-4 [Pygocentrus nattereri]	ko04810//Regulation of actin cytoskeleton//Cell motility//Cellular Processes	GO:0005737//cytoplasm;GO:0044464//cell part;GO:0044424//intracellular part;GO:0005622//intracellular;GO:0005623//cell	GO:0005515//protein binding;GO:0005488//binding;GO:0008092//cytoskeletal protein binding	GO:0071840//cellular component organization or biogenesis;GO:0051494//negative regulation of cytoskeleton organization;GO:0050789//regulation of biological process;GO:0051128//regulation of cellular component organization;GO:0010639//negative regulation of organelle organization;GO:0030832//regulation of actin filament length;GO:0044763//single-organism cellular process;GO:0048523//negative regul…
Unigene0000876	114.333333333333	136	1.7669	2.2218	2.7273	2.3958	3.1027	2.0693	2.23866666666667	2.5226	0.172271731708274	0.714055499377456	1	no	-	PREDICTED: oxysterol-binding protein-related protein 5 isoform X1 [Esox lucius]	-	-	-	-
Unigene0000877	166	207.666666666667	12.2410	10.8181	10.7779	11.1646	16.0994	12.9117	11.279	13.3919	0.247721496577662	0.566979356244556	1	no	-	--	-	-	-	-
Unigene0000878	0	0.666666666666667	0.0000	0.0000	0.0000	0.0000	0.0000	0.1693	0.001	0.0564333333333333	5.81847566228712	0.556196113762337	1	no	-	PREDICTED: calcium/calmodulin-dependent protein kinase type IV-like [Pseudopodoces humilis]	ko04020//Calcium signaling pathway//Signal transduction//Environmental Information Processing	-	-	-
Unigene0000879	286.666666666667	362.666666666667	3.7263	4.2538	3.0854	4.3107	4.0462	4.6525	3.6885	4.33646666666667	0.233485784288089	0.562524506163261	1	no	-	ADP-ribosylation factor GTPase-activating protein 1-like [Scleropages formosus]	-	-	-	-
Unigene0000880	356.333333333333	317.666666666667	7.4842	6.5063	4.1963	5.2860	5.9147	4.1317	6.06226666666667	5.1108	-0.246308178989435	0.560461147859101	1	no	ALKBH4	PREDICTED: alpha-ketoglutarate-dependent dioxygenase alkB homolog 4-like [Sinocyclocheilus rhinocerous]	-	-	GO:0003824//catalytic activity	GO:0044699//single-organism process;GO:0008152//metabolic process;GO:0044710//single-organism metabolic process
Unigene0000881	10.3333333333333	14	0.4394	0.6612	0.6782	0.3022	0.9127	1.0581	0.592933333333333	0.757666666666667	0.353693374353704	0.650635991774588	1	no	-	PREDICTED: uncharacterized protein si:ch211-12e13.10 [Danio rerio]	-	-	-	-
Unigene0000882	26	46.6666666666667	1.0505	1.7997	0.8931	2.6805	2.5301	1.0895	1.24776666666667	2.10003333333333	0.751064053299232	0.207939291970844	1	no	-	--	-	-	-	-
Unigene0000883	2748	2963.33333333333	13.1699	10.4185	15.8541	11.9069	12.7576	15.2111	13.1475	13.2918666666667	0.0157552294383646	0.964352581755175	1	no	CSNK1G1	PREDICTED: casein kinase I-like isoform X2 [Sinocyclocheilus grahami]	ko04340//Hedgehog signaling pathway//Signal transduction//Environmental Information Processing	GO:0005623//cell;GO:0005622//intracellular;GO:0044464//cell part;GO:0044424//intracellular part	GO:0097367//carbohydrate derivative binding;GO:0036094//small molecule binding;GO:0003824//catalytic activity;GO:0004672//protein kinase activity;GO:0032549//ribonucleoside binding;GO:0001882//nucleoside binding;GO:0016772//transferase activity, transferring phosphorus-containing groups;GO:1901363//heterocyclic compound binding;GO:0016301//kinase activity;GO:0005488//binding;GO:0016773//phosphotr…	GO:0044238//primary metabolic process;GO:0007154//cell communication;GO:0044700//single organism signaling;GO:0044237//cellular metabolic process;GO:0044763//single-organism cellular process;GO:0019538//protein metabolic process;GO:0007166//cell surface receptor signaling pathway;GO:0023052//signaling;GO:0006464//cellular protein modification process;GO:0065007//biological regulation;GO:0043412//…
Unigene0000884	734.666666666667	947.333333333333	8.7837	6.9479	7.0668	5.8120	13.9441	8.6627	7.59946666666667	9.47293333333333	0.317913058167585	0.445577625010167	1	no	-	--	-	-	-	-
Unigene0000885	5.66666666666667	6.66666666666667	0.8811	0.1072	0.7053	0.9875	0.4339	0.4491	0.564533333333333	0.6235	0.1433307914306	0.927575742735225	1	no	-	--	-	-	-	-
Unigene0000886	43.6666666666667	44.6666666666667	1.1597	1.5513	1.6907	1.7133	1.4990	1.0049	1.46723333333333	1.40573333333333	-0.0617753781904165	0.917570391322269	1	no	-	--	-	-	-	-
Unigene0000887	10.6666666666667	14.3333333333333	0.9833	1.3991	0.9107	1.1722	1.6341	1.3532	1.0977	1.3865	0.336963794866598	0.628518040798354	1	no	-	--	-	-	-	-
Unigene0000888	26.6666666666667	25.6666666666667	0.4048	0.8030	0.9113	0.4640	0.5606	0.8588	0.706366666666667	0.6278	-0.170112235117662	0.804929785290007	1	no	-	--	-	-	-	-
Unigene0000889	5.66666666666667	12	0.6783	0.3712	0.1396	0.1866	0.7514	1.4312	0.396366666666667	0.789733333333333	0.994529944423049	0.271318276772609	1	no	-	--	-	-	-	-
Unigene0000890	18.6666666666667	11.6666666666667	1.2172	1.6176	2.2367	1.1161	0.4816	1.2762	1.6905	0.957966666666667	-0.819402654187835	0.236090573208688	1	no	-	--	-	-	-	-
Unigene0000891	5	5	1.0008	0.0000	0.0736	0.3933	0.4752	0.1967	0.358133333333333	0.355066666666667	-0.0124068762168257	1	1	no	-	--	-	-	-	-
Unigene0000892	51.6666666666667	51.6666666666667	2.6699	3.5838	1.9181	2.8640	2.6789	2.0797	2.72393333333333	2.54086666666667	-0.100370723483309	0.857365674754277	1	no	-	--	-	-	-	-
Unigene0000893	431.333333333333	385.666666666667	21.9912	12.5848	29.3354	14.2344	14.5435	24.5707	21.3038	17.7828666666667	-0.260622878790852	0.564682508550026	1	no	-	--	-	-	-	-
Unigene0000894	66.3333333333333	78	1.3539	1.2203	1.5366	1.4788	1.5440	1.5161	1.37026666666667	1.51296666666667	0.142923520367495	0.77659921626988	1	no	-	--	-	-	-	-
Unigene0000895	695	1026	6.5253	7.8431	6.7449	15.4753	7.2614	5.9241	7.03776666666667	9.5536	0.44092679071687	0.308760233357425	1	no	SERPINB1	PREDICTED: leukocyte elastase inhibitor-like [Sinocyclocheilus rhinocerous]	-	GO:0005576//extracellular region;GO:0044421//extracellular region part	-	-
Unigene0000896	124.666666666667	145.666666666667	6.9380	7.4602	9.2690	8.0362	8.9000	8.9893	7.88906666666667	8.64183333333333	0.131482778200891	0.771054652581817	1	no	-	--	-	-	-	-
Unigene0000897	76.3333333333333	77.3333333333333	2.9960	2.6972	5.7683	2.7915	3.9615	4.2115	3.8205	3.65483333333333	-0.0639558420230888	0.912537411898145	1	no	-	--	-	-	-	-
Unigene0000898	643.666666666667	720	15.0823	11.6444	19.9962	15.1809	16.1909	17.7412	15.5743	16.371	0.0719751279787562	0.853915480314265	1	no	-	--	-	-	-	-
Unigene0000899	11	12.3333333333333	0.5045	0.4016	0.6607	0.3364	0.6605	0.6732	0.522266666666667	0.5567	0.0921134556362422	0.95062824670402	1	no	-	--	-	-	-	-
Unigene0000900	27377	39913.6666666667	82.7103	293.6833	137.3595	514.9436	54.6714	87.6034	171.251033333333	219.0728	0.355297677590166	0.598739625575422	1	no	ITIH3	PREDICTED: inter-alpha-trypsin inhibitor heavy chain H3-like isoform X1 [Sinocyclocheilus anshuiensis]	-	-	-	-
Unigene0000901	19.6666666666667	6.66666666666667	1.7283	1.0014	0.3662	0.5127	0.2816	0.1865	1.03196666666667	0.326933333333333	-1.65832798791139	0.038150819283653	1	no	-	PREDICTED: piggyBac transposable element-derived protein 3-like [Lates calcarifer]	-	-	-	-
Unigene0000902	12	15.6666666666667	0.7556	0.5513	0.5702	0.9239	0.3907	0.9243	0.6257	0.7463	0.254284582086359	0.743651505562831	1	no	-	--	-	-	-	-
Unigene0000903	3	3.66666666666667	0.2724	0.0000	0.5606	0.2498	0.3018	0.4165	0.277666666666667	0.3227	0.216839582955186	0.891195900166789	1	no	-	--	-	-	-	-
Unigene0000904	12.6666666666667	26.3333333333333	2.0050	1.0128	0.0000	1.2021	3.1611	1.7687	1.00593333333333	2.04396666666667	1.02283697282507	0.259984323059138	1	no	-	--	-	-	-	-
Unigene0000905	16.3333333333333	11	0.4394	1.5028	0.9043	1.4605	0.1217	0.1008	0.948833333333333	0.561	-0.758153923061197	0.437045328657679	1	no	-	--	-	-	-	-
Unigene0000906	59.6666666666667	41	1.7681	0.6673	1.2967	1.1741	0.9231	0.3543	1.24403333333333	0.817166666666667	-0.606322881471549	0.327023196693574	1	no	-	--	-	-	-	-
Unigene0000907	54	33	1.6118	0.6136	1.6586	0.9853	0.7505	0.5143	1.29466666666667	0.750033333333333	-0.787554080960044	0.185675237997378	1	no	-	--	-	-	-	-
Unigene0000908	5.66666666666667	20.6666666666667	0.3043	0.9159	0.1566	2.0928	0.6742	1.6750	0.458933333333333	1.48066666666667	1.68989039039414	0.0393644576507742	1	no	-	--	-	-	-	-
Unigene0000909	36.3333333333333	31.6666666666667	1.5221	2.1558	1.4281	1.1084	1.6863	1.3964	1.702	1.39703333333333	-0.284864593040298	0.621082028039867	1	no	-	--	-	-	-	-
Unigene0000910	1275.33333333333	1434.66666666667	7.3998	11.9198	11.0591	10.8289	11.5780	9.5460	10.1262333333333	10.6509666666667	0.0728867403671178	0.843551794653627	1	no	cipc	PREDICTED: CLOCK-interacting pacemaker [Sinocyclocheilus rhinocerous]	-	-	-	-
Unigene0000911	22.6666666666667	15.6666666666667	0.5526	1.2852	3.0565	1.2034	1.7601	0.3169	1.63143333333333	1.09346666666667	-0.577230792728418	0.478864147525634	1	no	-	--	-	-	-	-
Unigene0000912	3	48.3333333333333	0.0445	0.1948	0.1832	3.2646	2.0214	0.9799	0.140833333333333	2.08863333333333	3.89049849883903	1.65113474194305e-06	0.00333267788205022	yes	Mpeg1	PREDICTED: macrophage-expressed gene 1 protein-like [Cyprinus carpio]	-	-	-	-
Unigene0000913	1012	1242.66666666667	13.8678	14.0159	7.8326	13.4827	16.4769	11.4897	11.9054333333333	13.8164333333333	0.214765104123034	0.582904176020482	1	no	Triobp	PREDICTED: TRIO and F-actin-binding protein-like isoform X2 [Danio rerio]	-	-	-	-
Unigene0000914	27	84.6666666666667	0.3522	1.5145	0.3107	3.8759	0.7805	1.3388	0.7258	1.9984	1.46120142012862	0.0520422271730065	1	no	-	--	-	-	-	-
Unigene0000915	367	308.666666666667	24.5347	23.4804	16.1401	18.2345	16.7554	15.4684	21.3850666666667	16.8194333333333	-0.346474604432758	0.396173642134259	1	no	-	--	-	-	-	-
Unigene0000916	2131	2063	47.6054	41.7286	39.8159	34.7475	45.4736	38.0856	43.0499666666667	39.4355666666667	-0.126514747018994	0.71363429097296	1	no	fam162b	PREDICTED: protein FAM162B-like [Sinocyclocheilus rhinocerous]	-	-	-	-
Unigene0000917	32.6666666666667	34.3333333333333	0.6838	0.9806	0.7522	0.4757	0.5224	1.3196	0.805533333333333	0.772566666666667	-0.0602848574684195	0.941960587209124	1	no	-	--	-	-	-	-
Unigene0000918	48.3333333333333	54.3333333333333	1.4771	2.0455	1.0547	2.9301	1.2023	0.5808	1.52576666666667	1.57106666666667	0.0422100515405786	0.964101423272256	1	no	-	--	-	-	-	-
Unigene0000919	124.333333333333	163.333333333333	2.8850	2.6489	1.9726	5.0423	2.1879	1.8474	2.50216666666667	3.02586666666667	0.274170528214367	0.597080467814913	1	no	-	--	-	-	-	-
Unigene0000920	32.3333333333333	59.6666666666667	1.0110	2.3136	1.3714	2.9919	2.4438	2.5296	1.56533333333333	2.6551	0.762296291075586	0.161107752479098	1	no	K02A2.6	Immunoglobulin superfamily member 21, partial [Larimichthys crocea]	-	-	-	-
Unigene0000921	19.3333333333333	25	0.8179	0.2797	0.4208	0.2344	1.0760	0.6331	0.506133333333333	0.647833333333333	0.35610521020545	0.640997721846469	1	no	P2RX7	PREDICTED: P2X purinoceptor 7-like isoform X1 [Nothobranchius furzeri]	-	-	-	-
Unigene0000922	103.666666666667	127.666666666667	3.2036	2.6552	4.1608	3.3654	3.1356	4.9649	3.33986666666667	3.82196666666667	0.194524686952828	0.687589184958482	1	no	-	PREDICTED: uncharacterized protein LOC107677180 isoform X3 [Sinocyclocheilus anshuiensis]	-	-	-	-
Unigene0000923	41.3333333333333	60	1.3127	0.8473	2.1475	2.4075	1.4170	1.9763	1.43583333333333	1.9336	0.429401082487069	0.446146382248486	1	no	-	--	-	-	-	-
Unigene0000924	250.666666666667	375.333333333333	1.8751	2.3532	2.3070	3.1791	2.9822	2.9589	2.17843333333333	3.04006666666667	0.480811998286062	0.228964625574641	1	no	CAMK2G	PREDICTED: calcium/calmodulin-dependent protein kinase type II subunit gamma-like [Sinocyclocheilus anshuiensis]	ko04020//Calcium signaling pathway//Signal transduction//Environmental Information Processing;ko04261//Adrenergic signaling in cardiomyocytes//Circulatory system//Organismal Systems;ko04310//Wnt signaling pathway//Signal transduction//Environmental Information Processing;ko04916//Melanogenesis//Endocrine system//Organismal Systems;ko04912//GnRH signaling pathway//Endocrine system//Organismal Syst…	-	-	-
Unigene0000925	9.66666666666667	14	0.5741	0.7680	0.5908	1.2284	1.2721	0.1756	0.6443	0.892033333333333	0.469365026749665	0.563068841509752	1	no	-	--	-	-	-	-
Unigene0000926	16.3333333333333	16.6666666666667	0.9988	0.2484	1.0278	0.5412	0.6538	0.9996	0.758333333333333	0.731533333333333	-0.0519085352107845	0.965812485767616	1	no	-	--	-	-	-	-
Unigene0000927	44.6666666666667	40	2.3800	0.2505	3.6266	1.3850	1.3183	2.5613	2.0857	1.75486666666667	-0.249170240523134	0.74221160682449	1	no	-	--	-	-	-	-
Unigene0000928	157	190.666666666667	2.7693	3.8494	3.3282	4.6710	3.6502	2.9115	3.31563333333333	3.74423333333333	0.175385871646039	0.696270026198597	1	no	-	--	-	-	-	-
Unigene0000929	17.6666666666667	15.3333333333333	0.9677	0.4888	0.5745	0.7167	0.5360	0.4098	0.677	0.554166666666667	-0.288835899020238	0.672797779332102	1	no	-	--	-	-	-	-
Unigene0000930	2404	2248.33333333333	66.7504	46.8203	79.8223	42.1536	54.2048	73.4718	64.4643333333333	56.6100666666667	-0.187442547886095	0.619329377224309	1	no	Ppp3r1	PREDICTED: calcineurin subunit B type 1-like [Sinocyclocheilus anshuiensis]	ko04010//MAPK signaling pathway//Signal transduction//Environmental Information Processing;ko04020//Calcium signaling pathway//Signal transduction//Environmental Information Processing;ko04310//Wnt signaling pathway//Signal transduction//Environmental Information Processing;ko04114//Oocyte meiosis//Cell growth and death//Cellular Processes;ko04210//Apoptosis//Cell growth and death//Cellular Proce…	GO:0044422//organelle part;GO:0043229//intracellular organelle;GO:0043226//organelle;GO:0044428//nuclear part;GO:0005737//cytoplasm;GO:0043233//organelle lumen;GO:0070013//intracellular organelle lumen;GO:0032991//macromolecular complex;GO:0044446//intracellular organelle part;GO:0031981//nuclear lumen;GO:0043234//protein complex;GO:0005634//nucleus;GO:0044464//cell part;GO:0043227//membrane-boun…	GO:0042578//phosphoric ester hydrolase activity;GO:0043169//cation binding;GO:0003824//catalytic activity;GO:0016791//phosphatase activity;GO:0016788//hydrolase activity, acting on ester bonds;GO:0004721//phosphoprotein phosphatase activity;GO:0005515//protein binding;GO:0043167//ion binding;GO:0046872//metal ion binding;GO:0004722//protein serine/threonine phosphatase activity;GO:0005488//bindin…	GO:0050896//response to stimulus;GO:0044267//cellular protein metabolic process;GO:0032502//developmental process;GO:0002768//immune response-regulating cell surface receptor signaling pathway;GO:0006952//defense response;GO:0050794//regulation of cellular process;GO:0006913//nucleocytoplasmic transport;GO:0010638//positive regulation of organelle organization;GO:0042991//transcription factor imp…
Unigene0000931	45.6666666666667	213.333333333333	0.7979	0.8571	0.4562	6.4087	1.4241	1.0844	0.703733333333333	2.9724	2.07852751936241	0.0021157959510159	0.36645732116764	no	LUM	zgc:86661, partial [Danio rerio]	-	-	-	GO:0009987//cellular process;GO:0009790//embryo development;GO:0007600//sensory perception;GO:0071840//cellular component organization or biogenesis;GO:0050877//neurological system process;GO:0050953//sensory perception of light stimulus;GO:0032502//developmental process;GO:0007275//multicellular organism development;GO:0048513//animal organ development;GO:0044767//single-organism developmental p…
Unigene0000932	31.3333333333333	36.3333333333333	3.9330	2.2788	1.2697	2.1921	3.0756	2.9715	2.49383333333333	2.7464	0.13917671151773	0.826158873663796	1	no	-	--	-	-	-	-
Unigene0000933	7.33333333333333	22	0.1540	0.2697	0.2853	0.8757	0.7508	0.3674	0.236333333333333	0.664633333333333	1.49173552353692	0.0349444127478064	1	no	-	--	-	-	-	-
Unigene0000934	117.333333333333	254.666666666667	0.5634	1.9798	1.1393	3.7345	2.0807	1.4691	1.2275	2.4281	0.984104814900916	0.0745014269843366	1	no	TAGAP	PREDICTED: T-cell activation Rho GTPase-activating protein-like isoform X1 [Sinocyclocheilus grahami]	-	GO:0044464//cell part;GO:0005623//cell	-	-
Unigene0000935	117	234.666666666667	1.9591	0.8872	1.2166	4.8627	1.1600	1.4461	1.3543	2.4896	0.878366610148958	0.137150793578338	1	no	Ovos	PREDICTED: alpha-2-macroglobulin-like [Sinocyclocheilus grahami]	-	GO:0005576//extracellular region	-	-
Unigene0000936	5	3.66666666666667	0.3002	0.0548	0.4120	0.0000	0.0554	0.4591	0.255666666666667	0.1715	-0.576055500608967	0.701881547257773	1	no	-	--	-	-	-	-
Unigene0000937	453.666666666667	671	10.6025	8.4758	8.1680	7.0836	12.1953	18.4795	9.0821	12.5861333333333	0.470737304537216	0.277569388061923	1	no	ZBED9	PREDICTED: SCAN domain-containing protein 3-like [Sinocyclocheilus grahami]	-	-	-	-
Unigene0000938	88.3333333333333	151.333333333333	2.1123	1.9513	1.2763	3.9627	1.7605	2.6490	1.77996666666667	2.79073333333333	0.648794051047637	0.192981953114735	1	no	-	--	-	-	-	-
Unigene0000939	38	41.6666666666667	1.3211	1.4787	0.7724	1.1013	0.7983	1.6802	1.19073333333333	1.19326666666667	0.00306613155420344	1	1	no	-	--	-	-	-	-
Unigene0000940	278	220.333333333333	6.4215	3.5376	8.5594	2.8454	6.9708	4.4481	6.17283333333333	4.75476666666667	-0.376558294442237	0.443016611526208	1	no	-	--	-	-	-	-
Unigene0000941	14	56.6666666666667	0.3015	0.4125	0.1163	2.2117	0.4175	0.3803	0.276766666666667	1.00316666666667	1.85781921334451	0.0187530415456634	0.899743994685964	no	PRDM1	PREDICTED: PR domain zinc finger protein 1-like isoform X3 [Cyprinus carpio]	-	-	-	-
Unigene0000942	4	4.66666666666667	0.2428	0.2657	0.2498	0.3339	0.2690	0.2227	0.252766666666667	0.2752	0.122674247844038	1	1	no	-	--	-	-	-	-
Unigene0000943	7.33333333333333	8.33333333333333	0.2225	0.6819	0.1374	0.4489	0.3944	0.2450	0.347266666666667	0.362766666666667	0.0629979614944828	0.999999999999999	1	no	Dos	PREDICTED: voltage-dependent calcium channel beta subunit-associated regulatory protein-like [Sinocyclocheilus anshuiensis]	-	-	-	-
Unigene0000944	1368.66666666667	2342.66666666667	2.7093	4.6131	3.0051	4.5092	4.9166	6.8760	3.4425	5.43393333333333	0.658540211483162	0.0825049527057091	1	no	NBEAL1	PREDICTED: neurobeachin-like protein 1 isoform X2 [Sinocyclocheilus grahami]	-	-	-	-
Unigene0000945	0.666666666666667	0.666666666666667	0.0880	0.0000	0.0905	0.1613	0.0000	0.0000	0.0595	0.0537666666666667	-0.146177635760818	1	1	no	-	--	-	-	-	-
Unigene0000946	5984.33333333333	6939	29.5693	37.7949	27.4169	23.2256	47.6090	33.8701	31.5937	34.9015666666667	0.143654893979054	0.695607938686745	1	no	Gpat2	glycerol-3-phosphate acyltransferase 2, mitochondrial [Danio rerio]	ko01100//Metabolic pathways//Global and Overview//Metabolism;ko01110//Biosynthesis of secondary metabolites//Global and Overview//Metabolism;ko00564//Glycerophospholipid metabolism//Lipid metabolism//Metabolism;ko00561//Glycerolipid metabolism//Lipid metabolism//Metabolism	-	GO:0016747//transferase activity, transferring acyl groups other than amino-acyl groups;GO:0016740//transferase activity;GO:0016746//transferase activity, transferring acyl groups;GO:0003824//catalytic activity	GO:0044699//single-organism process;GO:0008152//metabolic process;GO:0044238//primary metabolic process;GO:0044710//single-organism metabolic process;GO:0071704//organic substance metabolic process;GO:0006629//lipid metabolic process
Unigene0000947	2.66666666666667	3	0.1067	0.1557	0.0366	0.0652	0.0788	0.1632	0.0996666666666667	0.1024	0.0390327316356883	1	1	no	-	--	-	-	-	-
Unigene0000948	3767	2604	249.9229	163.7904	150.7705	137.2733	111.5650	116.5933	188.161266666667	121.810533333333	-0.627330784336366	0.0784422185438493	1	no	-	--	-	-	-	-
Unigene0000949	23.3333333333333	26	0.9051	0.5547	1.1549	0.4648	0.9626	1.3285	0.871566666666667	0.918633333333333	0.0758781126369121	0.92492574225418	1	no	MYH6	Myosin-7 [Larimichthys crocea]	ko04261//Adrenergic signaling in cardiomyocytes//Circulatory system//Organismal Systems;ko04530//Tight junction//Cellular commiunity//Cellular Processes;ko04260//Cardiac muscle contraction//Circulatory system//Organismal Systems	GO:0015629//actin cytoskeleton;GO:0043226//organelle;GO:0005622//intracellular;GO:0043228//non-membrane-bounded organelle;GO:0005856//cytoskeleton;GO:0005623//cell;GO:0043229//intracellular organelle;GO:0044464//cell part;GO:0043232//intracellular non-membrane-bounded organelle;GO:0044424//intracellular part	GO:1901363//heterocyclic compound binding;GO:0016817//hydrolase activity, acting on acid anhydrides;GO:0016787//hydrolase activity;GO:0032549//ribonucleoside binding;GO:0097367//carbohydrate derivative binding;GO:0017111//nucleoside-triphosphatase activity;GO:0016818//hydrolase activity, acting on acid anhydrides, in phosphorus-containing anhydrides;GO:0005515//protein binding;GO:0003824//catalyt…	GO:0032502//developmental process;GO:0048856//anatomical structure development;GO:0044699//single-organism process;GO:0009790//embryo development;GO:0032501//multicellular organismal process;GO:0007275//multicellular organism development;GO:0044707//single-multicellular organism process;GO:0044767//single-organism developmental process
Unigene0000950	24.3333333333333	37.6666666666667	1.2950	0.7874	0.6293	1.7482	0.7572	1.3530	0.9039	1.28613333333333	0.508805135725116	0.401632034312755	1	no	ZNF502	PREDICTED: gastrula zinc finger protein XlCGF26.1-like isoform X2 [Sinocyclocheilus anshuiensis]	-	-	-	-
Unigene0000951	45.6666666666667	48.3333333333333	0.8795	0.9849	1.0523	0.9752	1.0876	0.8444	0.972233333333333	0.969066666666667	-0.00470667938825122	1	1	no	-	--	-	-	-	-
Unigene0000952	188	267.666666666667	7.2639	8.8288	6.4128	10.6573	10.7157	8.6283	7.50183333333333	10.0004333333333	0.414747399017398	0.326227192508086	1	no	-	--	-	-	-	-
Unigene0000953	24	25.6666666666667	1.8765	2.2181	1.5448	2.1337	2.3284	1.2395	1.8798	1.90053333333333	0.015825153215638	1	1	no	-	--	-	-	-	-
Unigene0000954	76.3333333333333	92.6666666666667	1.4553	2.4869	2.1806	2.8093	2.6870	1.4756	2.04093333333333	2.32396666666667	0.187360318089955	0.717729528479222	1	no	-	--	-	-	-	-
Unigene0000955	118.666666666667	127	2.4554	3.4223	1.9436	3.2137	2.7435	1.8483	2.6071	2.60183333333333	-0.00291737136376244	0.999999999999999	1	no	-	--	-	-	-	-
Unigene0000956	7.66666666666667	4	0.3509	0.4481	0.6019	0.4291	0.2592	0.0000	0.466966666666667	0.229433333333333	-1.02524456093679	0.322530335411021	1	no	-	--	-	-	-	-
Unigene0000957	7528.66666666667	6759	146.9757	115.2115	127.2518	97.7794	110.5923	120.1962	129.813	109.522633333333	-0.245205827996143	0.456597507774123	1	no	mtpn	myotrophin [Danio rerio]	-	GO:0043232//intracellular non-membrane-bounded organelle;GO:0015629//actin cytoskeleton;GO:0043227//membrane-bounded organelle;GO:0005856//cytoskeleton;GO:0043005//neuron projection;GO:0043228//non-membrane-bounded organelle;GO:0043229//intracellular organelle;GO:0044444//cytoplasmic part;GO:0005622//intracellular;GO:0005623//cell;GO:0044424//intracellular part;GO:0044464//cell part;GO:0097458//n…	-	GO:0014896//muscle hypertrophy;GO:0051252//regulation of RNA metabolic process;GO:0065007//biological regulation;GO:0014897//striated muscle hypertrophy;GO:0003300//cardiac muscle hypertrophy;GO:0051171//regulation of nitrogen compound metabolic process;GO:0010604//positive regulation of macromolecule metabolic process;GO:0080090//regulation of primary metabolic process;GO:1903508//positive regul…
Unigene0000958	96.6666666666667	99.3333333333333	1.6948	0.4561	1.9727	1.2611	1.2774	1.4784	1.37453333333333	1.33896666666667	-0.0378218480976603	0.950556578319039	1	no	-	--	-	-	-	-
Unigene0000959	20.6666666666667	10.3333333333333	1.3317	0.4858	0.7475	0.0740	0.4471	0.7034	0.855	0.408166666666667	-1.06676605193044	0.180428647718076	1	no	-	--	-	-	-	-
Unigene0000960	20.3333333333333	31	1.2363	2.9961	1.4540	3.4009	2.1523	2.3494	1.89546666666667	2.6342	0.474811799720304	0.448698550076218	1	no	-	--	-	-	-	-
Unigene0000961	32.6666666666667	57.6666666666667	0.3056	0.9825	0.6879	2.1192	0.6348	0.3855	0.658666666666667	1.0465	0.667951865392187	0.349444765002656	1	no	foxa1	hepatocyte nuclear factor 3-alpha [Danio rerio]	-	-	-	-
Unigene0000962	33.3333333333333	72.6666666666667	0.4415	0.3866	8.2694	13.5228	2.5436	2.0254	3.0325	6.0306	0.991793901383532	0.329463663271411	1	no	IGKV4-1	PREDICTED: polymeric immunoglobulin receptor-like [Sinocyclocheilus anshuiensis]	-	GO:0016020//membrane;GO:0031224//intrinsic component of membrane;GO:0044425//membrane part	-	-
Unigene0000963	29.6666666666667	47	0.2186	0.3045	1.3090	0.3827	0.8807	1.4587	0.6107	0.907366666666667	0.571221816140723	0.440723380359927	1	no	-	PREDICTED: uncharacterized protein LOC108257802 isoform X2 [Ictalurus punctatus]	-	-	-	-
Unigene0000964	64	34.6666666666667	6.4338	2.6672	10.1317	2.3241	3.0239	4.4716	6.4109	3.2732	-0.969825148071321	0.110575934361846	1	no	-	--	-	-	-	-
Unigene0000965	1760.66666666667	1966.66666666667	33.0746	34.7131	20.1321	35.5859	29.8832	26.0945	29.3066	30.5212	0.0585860819065659	0.874914671648599	1	no	TIA1	TIA1 cytotoxic granule-associated RNA binding protein 1 [Danio rerio]	-	-	GO:0005488//binding;GO:0097159//organic cyclic compound binding	-
Unigene0000966	39.6666666666667	44.3333333333333	0.7951	1.1810	1.5487	1.3800	1.8246	0.5731	1.17493333333333	1.25923333333333	0.0999667368058684	0.877360730507309	1	no	-	--	-	-	-	-
Unigene0000967	52.6666666666667	47.6666666666667	5.2877	4.0909	5.5351	3.9291	4.2420	4.5165	4.97123333333333	4.2292	-0.233219032812732	0.657182295490449	1	no	-	--	-	-	-	-
Unigene0000968	251.333333333333	218.333333333333	12.4654	13.3495	9.2874	10.3653	12.0280	6.5173	11.7007666666667	9.63686666666667	-0.279967012715178	0.52758422336462	1	no	-	--	-	-	-	-
Unigene0000969	5466	4149	157.7188	125.5782	105.3937	100.4130	95.9378	81.1458	129.563566666667	92.4988666666667	-0.486152494386092	0.154147101006353	1	no	tma7	PREDICTED: translation machinery-associated protein 7 [Cyprinodon variegatus]	-	-	-	-
Unigene0000970	31.6666666666667	31.3333333333333	1.7471	1.2748	1.7479	1.2905	1.9893	1.2466	1.58993333333333	1.5088	-0.0755646927576949	0.889588261659872	1	no	-	--	-	-	-	-
Unigene0000971	31	36.3333333333333	0.8104	1.2988	0.7148	1.2739	0.8016	0.9559	0.941333333333333	1.01046666666667	0.102244142906527	0.876302793787371	1	no	-	--	-	-	-	-
Unigene0000972	1405.66666666667	1552	17.5473	13.2575	14.1386	14.1747	14.4345	17.8262	14.9811333333333	15.4784666666667	0.0471157929693901	0.895524881077993	1	no	ZNF180	PREDICTED: zinc finger and SCAN domain-containing protein 5A-like isoform X1 [Sinocyclocheilus anshuiensis]	-	-	-	-
Unigene0000973	31796	34599	1715.1926	1675.6632	1454.1879	1526.9210	1877.2383	1569.2120	1615.01456666667	1657.79043333333	0.0377144651956962	0.907354334459105	1	no	rpl35	PREDICTED: 60S ribosomal protein L35 isoform X1 [Cyprinus carpio]	ko03010//Ribosome//Translation//Genetic Information Processing	GO:0032991//macromolecular complex;GO:1990904//ribonucleoprotein complex;GO:0005622//intracellular;GO:0044464//cell part;GO:0030529//intracellular ribonucleoprotein complex;GO:0044424//intracellular part;GO:0005623//cell	-	GO:0043170//macromolecule metabolic process;GO:0007275//multicellular organism development;GO:0032502//developmental process;GO:0044707//single-multicellular organism process;GO:0009987//cellular process;GO:0008152//metabolic process;GO:0010467//gene expression;GO:0044767//single-organism developmental process;GO:0007049//cell cycle;GO:0071704//organic substance metabolic process;GO:0032501//mult…
Unigene0000974	7	10	0.4237	0.3313	0.5606	0.4996	0.7377	0.5553	0.438533333333333	0.597533333333333	0.44633268847525	0.625936589471959	1	no	-	--	-	-	-	-
Unigene0000975	10.6666666666667	14	1.0121	0.4846	0.5858	1.1020	1.0511	0.4642	0.694166666666667	0.872433333333333	0.329762802775499	0.689834852712495	1	no	-	--	-	-	-	-
Unigene0000976	3429.33333333333	4527	8.0344	11.2389	8.8986	11.3668	12.6534	10.7884	9.39063333333333	11.6028666666667	0.305186923306091	0.366868186306562	1	no	Ubr3	PREDICTED: E3 ubiquitin-protein ligase UBR3-like isoform X2 [Sinocyclocheilus anshuiensis]	-	-	GO:0043169//cation binding;GO:0046914//transition metal ion binding;GO:0046872//metal ion binding;GO:0043167//ion binding;GO:0005488//binding	GO:0044260//cellular macromolecule metabolic process;GO:0008152//metabolic process;GO:0043170//macromolecule metabolic process;GO:0032446//protein modification by small protein conjugation;GO:0009987//cellular process;GO:0019538//protein metabolic process;GO:0070647//protein modification by small protein conjugation or removal;GO:0044237//cellular metabolic process;GO:0006464//cellular protein mo…
Unigene0000977	688	674.333333333333	5.8971	6.3627	4.0691	5.5467	5.2383	4.1986	5.44296666666667	4.99453333333333	-0.124043315467645	0.749031958733726	1	no	Srm	spermidine synthase [Danio rerio]	ko01100//Metabolic pathways//Global and Overview//Metabolism;ko00480//Glutathione metabolism//Metabolism of other amino acids//Metabolism;ko00330//Arginine and proline metabolism//Amino acid metabolism//Metabolism;ko00270//Cysteine and methionine metabolism//Amino acid metabolism//Metabolism;ko00410//beta-Alanine metabolism//Metabolism of other amino acids//Metabolism	-	GO:0003824//catalytic activity	-
Unigene0000978	21.3333333333333	25.6666666666667	0.7231	0.4239	0.5581	1.0419	0.3147	0.5212	0.568366666666667	0.625933333333333	0.139187060852506	0.868606648801308	1	no	-	--	-	-	-	-
Unigene0000979	1793.33333333333	2263.33333333333	24.0639	30.9973	29.9870	33.5296	37.0174	30.1957	28.3494	33.5809	0.244322694773789	0.481205982697977	1	no	PTTG1IP	PREDICTED: pituitary tumor-transforming gene 1 protein-interacting protein-like [Sinocyclocheilus anshuiensis]	-	-	-	-
Unigene0000980	9.66666666666667	7.33333333333333	0.8585	0.7950	0.3398	1.0900	0.2926	0.0000	0.664433333333333	0.460866666666667	-0.527775027407641	0.640701205265028	1	no	-	--	-	-	-	-
Unigene0000981	9	10	0.3945	0.1329	0.3123	0.2783	0.0672	0.5012	0.2799	0.282233333333333	0.0119769014309579	1	1	no	-	PREDICTED: pleckstrin homology domain-containing family S member 1-like [Sinocyclocheilus grahami]	-	-	-	-
Unigene0000982	280	200	6.8135	12.1053	8.0176	5.6875	7.7515	4.7092	8.9788	6.0494	-0.569730586230223	0.201348933135402	1	no	-	--	-	-	-	-
Unigene0000983	125	168	1.1252	2.2747	1.8118	2.4642	2.4199	1.6517	1.73723333333333	2.1786	0.32660979595066	0.488111227930483	1	no	-	--	-	-	-	-
Unigene0000984	12.3333333333333	12.3333333333333	1.2914	0.2650	1.4950	1.6282	0.1788	0.9626	1.01713333333333	0.9232	-0.139793681594256	0.887107221288051	1	no	-	--	-	-	-	-
Unigene0000985	245.333333333333	475	1.7195	2.0628	1.2998	3.0260	3.4728	2.7424	1.69403333333333	3.0804	0.862655439024145	0.0347077083847308	1	no	c3	PREDICTED: complement C3-like [Sinocyclocheilus rhinocerous]	ko04145//Phagosome//Transport and catabolism//Cellular Processes	-	-	GO:0019538//protein metabolic process;GO:0050789//regulation of biological process;GO:0065007//biological regulation;GO:0050896//response to stimulus;GO:0006955//immune response;GO:0044238//primary metabolic process;GO:0006950//response to stress;GO:0008152//metabolic process;GO:0006952//defense response;GO:0043170//macromolecule metabolic process;GO:0002376//immune system process;GO:0071704//org…
Unigene0000986	17.6666666666667	12	1.3618	0.7984	0.5005	0.4014	0.8621	0.4908	0.8869	0.584766666666667	-0.600910370549152	0.413035351296621	1	no	-	--	-	-	-	-
Unigene0000987	65.6666666666667	98.6666666666667	2.7295	0.7935	0.7680	1.0950	2.2679	2.8171	1.43033333333333	2.06	0.526292937043355	0.401204886647827	1	no	-	PREDICTED: uncharacterized protein LOC109045355 [Cyprinus carpio]	-	-	-	-
Unigene0000988	324.333333333333	414.333333333333	1.6120	2.2692	2.3679	2.3300	2.6037	2.5287	2.08303333333333	2.48746666666667	0.255991266921513	0.522705938317014	1	no	Rasl10b	PREDICTED: ras-like protein family member 10B [Cyprinus carpio]	-	-	GO:0032550//purine ribonucleoside binding;GO:0032549//ribonucleoside binding;GO:0001882//nucleoside binding;GO:1901363//heterocyclic compound binding;GO:0097159//organic cyclic compound binding;GO:0001883//purine nucleoside binding;GO:0097367//carbohydrate derivative binding;GO:0036094//small molecule binding;GO:0005488//binding	GO:0009154//purine ribonucleotide catabolic process;GO:0050794//regulation of cellular process;GO:0044281//small molecule metabolic process;GO:0072521//purine-containing compound metabolic process;GO:0007154//cell communication;GO:0046700//heterocycle catabolic process;GO:0051716//cellular response to stimulus;GO:1901575//organic substance catabolic process;GO:0007165//signal transduction;GO:0009…
Unigene0000989	11	19	0.5701	1.1231	0.2933	0.9932	0.6947	1.4121	0.662166666666667	1.03333333333333	0.642039422073496	0.391303669023072	1	no	tc1a	PREDICTED: forkhead box protein N1 isoform X1 [Oreochromis niloticus]	-	-	GO:0016757//transferase activity, transferring glycosyl groups;GO:0003824//catalytic activity;GO:0016740//transferase activity	-
Unigene0000990	8	12.3333333333333	0.4582	0.4299	0.7410	1.3205	0.2176	0.7207	0.543033333333333	0.752933333333333	0.471481372055145	0.613384795655186	1	no	-	putative nuclease HARBI1, partial [Larimichthys crocea]	-	-	-	-
Unigene0000991	51.6666666666667	68.6666666666667	1.3728	1.2125	1.2887	1.3471	1.3874	2.0548	1.29133333333333	1.59643333333333	0.305990854352836	0.555642802040345	1	no	-	putative nuclease HARBI1, partial [Larimichthys crocea]	-	-	-	-
Unigene0000992	11.6666666666667	3.66666666666667	0.2674	0.5854	1.1008	0.2452	0.2370	0.0981	0.6512	0.193433333333333	-1.75126427143405	0.0546306495472642	1	no	-	--	-	-	-	-
Unigene0000993	13.6666666666667	18	0.5131	0.6239	1.2906	0.8887	1.1368	0.9937	0.8092	1.0064	0.314635602321006	0.665237431620974	1	no	-	--	-	-	-	-
Unigene0000994	484.666666666667	522.666666666667	19.6157	17.2098	11.3565	18.9230	14.5229	14.9234	16.0606666666667	16.1231	0.00559737921955729	0.990648880426566	1	no	Tuba1a	PREDICTED: tubulin alpha-1 chain-like [Astyanax mexicanus]	ko04145//Phagosome//Transport and catabolism//Cellular Processes;ko04540//Gap junction//Cellular commiunity//Cellular Processes	GO:0043227//membrane-bounded organelle;GO:0043229//intracellular organelle;GO:0043232//intracellular non-membrane-bounded organelle;GO:0044446//intracellular organelle part;GO:0005856//cytoskeleton;GO:0005737//cytoplasm;GO:0044422//organelle part;GO:0043228//non-membrane-bounded organelle;GO:0099513//polymeric cytoskeletal fiber;GO:0099512//supramolecular fiber;GO:0005622//intracellular;GO:004446…	GO:0005515//protein binding;GO:0005198//structural molecule activity;GO:0001882//nucleoside binding;GO:0097367//carbohydrate derivative binding;GO:0016818//hydrolase activity, acting on acid anhydrides, in phosphorus-containing anhydrides;GO:0016787//hydrolase activity;GO:0003824//catalytic activity;GO:0001883//purine nucleoside binding;GO:0016462//pyrophosphatase activity;GO:0097159//organic cyc…	GO:0044710//single-organism metabolic process;GO:0009056//catabolic process;GO:0044712//single-organism catabolic process;GO:0032502//developmental process;GO:0043623//cellular protein complex assembly;GO:0034097//response to cytokine;GO:0044772//mitotic cell cycle phase transition;GO:1901565//organonitrogen compound catabolic process;GO:1901292//nucleoside phosphate catabolic process;GO:0051649/…
Unigene0000995	941	880	20.4824	14.1109	17.5310	12.3793	14.8376	18.5781	17.3747666666667	15.265	-0.186766013839471	0.623634191728164	1	no	POLR3GL	PREDICTED: DNA-directed RNA polymerase III subunit RPC7-like isoform X1 [Sinocyclocheilus grahami]	ko01100//Metabolic pathways//Global and Overview//Metabolism;ko00230//Purine metabolism//Nucleotide metabolism//Metabolism;ko00240//Pyrimidine metabolism//Nucleotide metabolism//Metabolism;ko04623//Cytosolic DNA-sensing pathway//Immune system//Organismal Systems;ko03020//RNA polymerase//Transcription//Genetic Information Processing	-	-	-
Unigene0000996	30.6666666666667	28	0.8165	1.0818	2.2111	0.4729	1.3806	1.6953	1.3698	1.18293333333333	-0.211596495505308	0.763315789461684	1	no	-	--	-	-	-	-
Unigene0000997	290.666666666667	361.666666666667	3.0743	3.1772	2.8940	4.2795	3.5734	2.7927	3.0485	3.54853333333333	0.219123312441167	0.589190313705365	1	no	mul1a	LOC402879 protein, partial [Danio rerio]	-	-	-	GO:0008152//metabolic process;GO:0036211//protein modification process;GO:0071840//cellular component organization or biogenesis;GO:0006996//organelle organization;GO:0019538//protein metabolic process;GO:0044238//primary metabolic process;GO:0016043//cellular component organization;GO:0044260//cellular macromolecule metabolic process;GO:0043412//macromolecule modification;GO:0043170//macromolecu…
Unigene0000998	2704	1967.33333333333	76.1665	46.7539	67.3429	42.7766	37.7098	49.0098	63.4211	43.1654	-0.555087542769167	0.121431804204628	1	no	-	PREDICTED: small kinetochore-associated protein-like [Sinocyclocheilus grahami]	-	-	-	-
Unigene0000999	26	33	0.5781	1.1073	0.6842	1.1663	0.9287	0.6895	0.789866666666667	0.928166666666667	0.232774746895526	0.688053857136323	1	no	-	--	-	-	-	-
Unigene0001000	279	296	25.5685	34.5623	18.4641	27.8879	27.1334	22.7164	26.1983	25.9125666666667	-0.0158212757027597	0.971769155748176	1	no	-	--	-	-	-	-
Unigene0001001	43	41	0.5391	0.5057	1.0144	0.3955	0.7508	0.7207	0.6864	0.622333333333333	-0.141362031107138	0.806759336322596	1	no	KCTD16	PREDICTED: BTB/POZ domain-containing protein KCTD16-like [Cyprinus carpio]	-	-	-	GO:1902578//single-organism localization;GO:0044765//single-organism transport;GO:0044699//single-organism process;GO:0051234//establishment of localization;GO:0006810//transport;GO:0051179//localization
Unigene0001002	399.333333333333	467	29.5280	21.8616	25.5344	32.9922	16.5625	33.0084	25.6413333333333	27.5210333333333	0.102063356835974	0.811070116248673	1	no	-	PREDICTED: uncharacterized protein LOC109096714 isoform X3 [Cyprinus carpio]	-	-	-	-
Unigene0001003	12.6666666666667	15.3333333333333	1.1534	0.4208	0.5652	0.5036	0.4868	1.4108	0.713133333333333	0.8004	0.166549327103083	0.883748123995575	1	no	-	PREDICTED: uncharacterized protein LOC109096714 isoform X4 [Cyprinus carpio]	-	-	-	-
Unigene0001004	27.6666666666667	40.3333333333333	0.4276	2.1448	0.5866	1.9930	1.5000	0.7191	1.053	1.40403333333333	0.415071750891261	0.566881519160185	1	no	-	--	-	-	-	-
Unigene0001005	32.3333333333333	33	1.7151	2.0588	1.8219	0.9639	0.4904	3.6546	1.86526666666667	1.70296666666667	-0.131331702773104	0.880058142241726	1	no	-	--	-	-	-	-
Unigene0001006	33.3333333333333	35.3333333333333	2.0575	2.3144	1.5880	1.8867	2.4694	1.6254	1.98663333333333	1.99383333333333	0.00521919487992703	1	1	no	-	--	-	-	-	-
Unigene0001007	192	222	1.6125	2.6779	1.3795	2.1061	2.5445	1.5137	1.88996666666667	2.05476666666667	0.12061378508555	0.797461317767493	1	no	GABRD	PREDICTED: gamma-aminobutyric acid receptor subunit delta-like [Sinocyclocheilus anshuiensis]	ko04080//Neuroactive ligand-receptor interaction//Signaling molecules and interaction//Environmental Information Processing	GO:0016020//membrane;GO:0044425//membrane part;GO:0031224//intrinsic component of membrane	GO:0004872//receptor activity;GO:0022891//substrate-specific transmembrane transporter activity;GO:0005215//transporter activity;GO:0022892//substrate-specific transporter activity;GO:0060089//molecular transducer activity;GO:0015267//channel activity;GO:0022803//passive transmembrane transporter activity;GO:0099600//transmembrane receptor activity;GO:0022836//gated channel activity;GO:0022834//l…	GO:0006810//transport;GO:0051179//localization;GO:0006811//ion transport;GO:0009987//cellular process;GO:0044699//single-organism process;GO:0007154//cell communication;GO:0044765//single-organism transport;GO:1902578//single-organism localization;GO:0044763//single-organism cellular process;GO:0051234//establishment of localization
Unigene0001008	23.6666666666667	14.6666666666667	0.7533	0.8245	0.4153	0.6167	0.3577	0.1728	0.664366666666667	0.3824	-0.796897167318949	0.243952263954026	1	no	-	--	-	-	-	-
Unigene0001009	1999.66666666667	2099.33333333333	7.1963	6.8777	7.0634	5.7872	7.1159	7.9119	7.0458	6.93833333333333	-0.0221743708539771	0.949250140752115	1	no	XYLT2	PREDICTED: xylosyltransferase 2-like [Sinocyclocheilus anshuiensis]	ko01100//Metabolic pathways//Global and Overview//Metabolism;ko00534//Glycosaminoglycan biosynthesis - heparan sulfate / heparin//Glycan biosynthesis and metabolism//Metabolism;ko00532//Glycosaminoglycan biosynthesis - chondroitin sulfate / dermatan sulfate//Glycan biosynthesis and metabolism//Metabolism	-	GO:0003824//catalytic activity;GO:0008194//UDP-glycosyltransferase activity;GO:0016740//transferase activity;GO:0016757//transferase activity, transferring glycosyl groups	GO:0006022//aminoglycan metabolic process;GO:0006807//nitrogen compound metabolic process;GO:0044711//single-organism biosynthetic process;GO:0009058//biosynthetic process;GO:0043170//macromolecule metabolic process;GO:1901566//organonitrogen compound biosynthetic process;GO:0044710//single-organism metabolic process;GO:0008152//metabolic process;GO:1901576//organic substance biosynthetic process…
Unigene0001010	1153.33333333333	1680	5.8090	8.5606	12.3211	9.7441	11.6823	14.7931	8.8969	12.0731666666667	0.440429487806104	0.26798683815774	1	no	-	PREDICTED: uncharacterized protein LOC101882312 [Danio rerio]	-	-	-	-
Unigene0001011	26.3333333333333	25.3333333333333	0.9436	1.1266	1.4566	1.1799	0.8078	1.1411	1.1756	1.04293333333333	-0.172750323639548	0.764548218941407	1	no	-	--	-	-	-	-
Unigene0001012	301.333333333333	351	9.9840	9.1752	6.3375	8.6077	9.5880	9.6573	8.4989	9.28433333333333	0.127522192910673	0.756813469989068	1	no	lipB	hypothetical protein cypCar_00048681 [Cyprinus carpio]	ko01100//Metabolic pathways//Global and Overview//Metabolism;ko00785//Lipoic acid metabolism//Metabolism of cofactors and vitamins//Metabolism	GO:0043229//intracellular organelle;GO:0005623//cell;GO:0044464//cell part;GO:0043231//intracellular membrane-bounded organelle;GO:0043227//membrane-bounded organelle;GO:0043226//organelle;GO:0044424//intracellular part;GO:0005622//intracellular	GO:0016746//transferase activity, transferring acyl groups;GO:0016747//transferase activity, transferring acyl groups other than amino-acyl groups;GO:0003824//catalytic activity;GO:0016740//transferase activity	GO:0044237//cellular metabolic process;GO:0006633//fatty acid biosynthetic process;GO:0044249//cellular biosynthetic process;GO:0006082//organic acid metabolic process;GO:0008610//lipid biosynthetic process;GO:0044699//single-organism process;GO:1901576//organic substance biosynthetic process;GO:0072330//monocarboxylic acid biosynthetic process;GO:0008152//metabolic process;GO:0071704//organic su…
Unigene0001013	0.666666666666667	0.333333333333333	0.0816	0.0893	0.0000	0.0748	0.0000	0.0000	0.0569666666666667	0.0249333333333333	-1.19204222178851	1	1	no	-	--	-	-	-	-
Unigene0001014	397.333333333333	678	2.9133	3.6352	2.2159	7.1431	3.0794	3.4345	2.92146666666667	4.55233333333333	0.639913370759989	0.150364145896313	1	no	Phactr2	PREDICTED: phosphatase and actin regulator 2 isoform X3 [Sinocyclocheilus rhinocerous]	-	-	-	-
Unigene0001015	9.66666666666667	17	0.5202	0.4880	1.2236	0.6815	1.8937	1.2273	0.743933333333333	1.2675	0.768740500324037	0.303317958450532	1	no	Tf2-9	Pol polyprotein [Dicentrarchus labrax]	ko03013//RNA transport//Translation//Genetic Information Processing	-	-	-
Unigene0001016	1411.66666666667	2585.33333333333	5.8886	8.5989	8.6668	10.8187	11.6790	16.7498	7.7181	13.0825	0.761320617479679	0.0396169965035598	1	no	Tf2-9	PREDICTED: LOW QUALITY PROTEIN: retrotransposon-like protein 1 [Maylandia zebra]	-	-	-	-
Unigene0001017	9.33333333333333	12	0.8226	1.2379	0.9523	0.8486	1.7087	1.1320	1.00426666666667	1.22976666666667	0.292242203272536	0.737477717888491	1	no	Tf2-9	PREDICTED: RNA-directed DNA polymerase homolog, partial [Danio rerio]	-	-	-	-
Unigene0001018	198.333333333333	348	1.1574	1.9001	2.2332	3.0669	3.0264	2.5765	1.76356666666667	2.88993333333333	0.712540098365339	0.0995784096827848	1	no	Tf2-6	Pol polyprotein [Dicentrarchus labrax]	-	-	-	-
Unigene0001019	147	191	3.2450	4.0035	1.8214	1.9116	3.9436	5.1602	3.0233	3.6718	0.28036333473527	0.58270775473283	1	no	Tf2-6	Retrotransposable element Tf2 protein type 1 [Larimichthys crocea]	-	-	-	-
Unigene0001020	0.666666666666667	1.33333333333333	0.1067	0.1168	0.0000	0.0000	0.1182	0.2937	0.0745	0.1373	0.882019294797577	0.753293522100228	1	no	-	--	-	-	-	-
Unigene0001021	302.666666666667	414.666666666667	2.8816	3.3899	1.9088	2.0490	3.7086	4.7254	2.72676666666667	3.49433333333333	0.357825985112272	0.428815375644691	1	no	PEG10	Pol polyprotein [Dicentrarchus labrax]	-	-	-	-
Unigene0001022	5.66666666666667	8	0.6169	1.1254	0.1058	1.0371	0.6835	0.6603	0.616033333333333	0.793633333333333	0.36546420480064	0.739916135472948	1	no	-	PREDICTED: copine-8-like [Sinocyclocheilus rhinocerous]	-	-	-	-
Unigene0001023	28.3333333333333	34.6666666666667	1.3246	1.1498	1.5511	1.3822	1.2651	1.9276	1.34183333333333	1.52496666666667	0.184572219862245	0.753270570179596	1	no	Tf2-8	Retrotransposable element Tf2 protein type 1 [Larimichthys crocea]	-	-	-	-
Unigene0001024	59.6666666666667	105	1.2849	0.6680	1.0082	1.5170	1.5303	1.8566	0.987033333333333	1.63463333333333	0.727796347058594	0.141813808097084	1	no	Tf2-9	Retrotransposable element Tf2 protein type 1 [Larimichthys crocea]	ko03013//RNA transport//Translation//Genetic Information Processing	-	-	-
Unigene0001025	3083	3695	25.4058	29.1270	26.8304	32.3317	34.0669	25.3064	27.1210666666667	30.5683333333333	0.172623974280213	0.609494184935538	1	no	-	PREDICTED: FHA domain-containing protein FhaA-like [Sinocyclocheilus grahami]	-	GO:0016020//membrane	-	GO:0022607//cellular component assembly;GO:0009966//regulation of signal transduction;GO:0048583//regulation of response to stimulus;GO:0007275//multicellular organism development;GO:0065007//biological regulation;GO:0048513//animal organ development;GO:0098609//cell-cell adhesion;GO:0070271//protein complex biogenesis;GO:0022037//metencephalon development;GO:0006461//protein complex assembly;GO:…
Unigene0001026	4.33333333333333	19.3333333333333	0.1185	0.7134	0.0000	2.1192	0.2626	0.8155	0.2773	1.06576666666667	1.94237209513422	0.0703549559109986	1	no	-	--	-	-	-	-
Unigene0001027	44.3333333333333	51	1.7344	1.8359	0.3804	1.0950	1.1969	1.9042	1.3169	1.3987	0.0869407620188282	0.909157164184384	1	no	-	--	-	-	-	-
Unigene0001028	5.33333333333333	3.33333333333333	0.1862	0.0000	0.0274	0.0244	0.0589	0.0488	0.0712	0.0440333333333333	-0.693281180440728	0.635610606890013	1	no	-	PREDICTED: uncharacterized protein LOC109083040 [Cyprinus carpio]	-	-	-	-
Unigene0001029	2	2.33333333333333	0.0975	0.3201	0.2006	0.1788	0.2160	0.2683	0.206066666666667	0.221033333333333	0.10115280079501	0.999999999999998	1	no	-	--	-	-	-	-
Unigene0001030	10	9.33333333333333	0.0903	0.3457	0.2786	0.2897	0.1250	0.1863	0.2382	0.200333333333333	-0.249770922986725	0.787964123024014	1	no	SYT14	PREDICTED: synaptotagmin-14-like [Sinocyclocheilus grahami]	-	-	-	-
Unigene0001031	8.33333333333333	2	0.5185	0.2027	0.2287	0.0000	0.0821	0.1359	0.316633333333333	0.0726666666666667	-2.12344750781217	0.050701797963445	1	no	-	--	-	-	-	-
Unigene0001032	6784	6263	122.8984	98.1804	87.8536	97.3223	85.5136	84.1931	102.977466666667	89.0096666666667	-0.210294754261858	0.528250106362035	1	no	txn	PREDICTED: thioredoxin-like [Sinocyclocheilus anshuiensis]	-	-	GO:0003824//catalytic activity;GO:0016491//oxidoreductase activity;GO:0015036//disulfide oxidoreductase activity;GO:0016667//oxidoreductase activity, acting on a sulfur group of donors	GO:0044281//small molecule metabolic process;GO:0009987//cellular process;GO:0018904//ether metabolic process;GO:0042592//homeostatic process;GO:0065007//biological regulation;GO:0044763//single-organism cellular process;GO:0019725//cellular homeostasis;GO:0008152//metabolic process;GO:0044699//single-organism process;GO:0044710//single-organism metabolic process;GO:0065008//regulation of biologi…
Unigene0001033	16	18.3333333333333	0.2310	0.4044	0.5229	0.2965	0.4861	0.4661	0.3861	0.416233333333333	0.108417951180426	0.89408965100641	1	no	-	--	-	-	-	-
Unigene0001034	18.3333333333333	20	0.3687	0.2691	0.7589	0.5636	0.5447	0.3383	0.465566666666667	0.4822	0.050643882119085	0.968382702284584	1	no	-	--	-	-	-	-
Unigene0001035	165	261	0.6092	1.1814	0.9843	1.9845	1.0123	1.0148	0.924966666666667	1.3372	0.53174197927361	0.265569814608323	1	no	Tf2-9	Pol polyprotein [Dicentrarchus labrax]	-	-	-	-
Unigene0001036	58.3333333333333	79	1.1114	0.9665	0.6894	1.1867	1.0289	1.2711	0.922433333333333	1.16223333333333	0.333383184745604	0.502005568228787	1	no	CALB1	PREDICTED: calbindin-like [Sinocyclocheilus anshuiensis]	-	-	-	-
Unigene0001037	2344.33333333333	2482	12.7076	8.6360	14.3401	9.7525	10.6511	14.9647	11.8945666666667	11.7894333333333	-0.0128083376866378	0.972687812491496	1	no	cep162	PREDICTED: centrosomal protein of 162 kDa isoform X2 [Sinocyclocheilus rhinocerous]	-	-	-	-
Unigene0001038	13	21	0.8411	0.3766	0.3147	0.7713	0.5506	0.9821	0.5108	0.768	0.588347785905795	0.395900133396479	1	no	-	PREDICTED: uncharacterized protein LOC107676182 [Sinocyclocheilus anshuiensis]	-	-	-	-
Unigene0001039	120.666666666667	125	2.4964	2.7874	4.2037	2.1273	3.8272	3.3776	3.1625	3.1107	-0.0238262136334337	0.96752856650251	1	no	CEP128	PREDICTED: centrosomal protein of 128 kDa-like [Sinocyclocheilus rhinocerous]	-	-	-	-
Unigene0001040	1.66666666666667	8.33333333333333	0.0370	0.1619	0.0000	0.1356	0.4096	0.3731	0.0663	0.3061	2.2069222694144	0.0391269668120133	1	no	-	--	-	-	-	-
Unigene0001041	31.3333333333333	35.3333333333333	2.3475	1.9031	4.2050	1.8337	2.4080	4.6263	2.81853333333333	2.956	0.0687016398973204	0.94201803735857	1	no	-	--	-	-	-	-
Unigene0001042	1871.66666666667	1718.66666666667	23.4148	10.2392	41.3575	9.6392	11.8760	41.9850	25.0038333333333	21.1667333333333	-0.240350656091137	0.678816517540709	1	no	SPATA22	PREDICTED: spermatogenesis-associated protein 22-like [Sinocyclocheilus rhinocerous]	-	-	-	-
Unigene0001043	18716.3333333333	21276.6666666667	391.3060	411.5257	311.1625	373.5963	466.3503	355.6378	371.3314	398.528133333333	0.101974256629004	0.758272346307964	1	no	rpl27	ribosomal protein L27, partial [Hypophthalmichthys nobilis]	ko03010//Ribosome//Translation//Genetic Information Processing	GO:0030529//intracellular ribonucleoprotein complex;GO:0005622//intracellular;GO:0032991//macromolecular complex;GO:0005623//cell;GO:0044464//cell part;GO:0044424//intracellular part;GO:1990904//ribonucleoprotein complex	-	GO:0043170//macromolecule metabolic process;GO:0008152//metabolic process;GO:0010467//gene expression;GO:0071704//organic substance metabolic process
Unigene0001044	20	34.3333333333333	0.8671	0.4466	0.2624	1.2862	0.7628	0.4913	0.525366666666667	0.846766666666667	0.688639810533806	0.294108974691554	1	no	Cd22	PREDICTED: B-cell receptor CD22-like isoform X1 [Cyprinus carpio]	-	-	-	-
Unigene0001045	281	270	5.6295	3.8508	2.1041	2.6785	2.9860	4.7140	3.86146666666667	3.4595	-0.158585376803097	0.738984647937602	1	no	SIGLEC14	PREDICTED: B-cell receptor CD22-like isoform X4 [Cyprinus carpio]	-	-	-	-
Unigene0001046	188.666666666667	281.333333333333	2.5681	2.4915	1.5464	3.9590	3.4290	1.8827	2.202	3.09023333333333	0.488901306487459	0.289588802634251	1	no	CEACAM5	PREDICTED: titin-like [Sinocyclocheilus anshuiensis]	-	-	-	-
Unigene0001047	1815.33333333333	2170.33333333333	5.5282	9.7210	5.8254	8.6616	8.4109	6.3836	7.02486666666667	7.8187	0.154457910419966	0.680513470600326	1	no	Arhgap39	PREDICTED: rho GTPase-activating protein 39-like [Sinocyclocheilus anshuiensis]	-	GO:0005623//cell;GO:0044464//cell part	-	GO:0044763//single-organism cellular process;GO:0044699//single-organism process;GO:0009987//cellular process;GO:0007154//cell communication
Unigene0001048	456	518.666666666667	3.9114	3.9722	2.6884	4.3353	3.6837	3.2071	3.524	3.74203333333333	0.0866084856353098	0.827957481648961	1	no	Cdk14	PREDICTED: cyclin-dependent kinase 14 isoform X1 [Lates calcarifer]	-	-	-	-
Unigene0001049	19	12	1.7735	0.3529	0.9955	0.6899	0.4168	0.7396	1.04063333333333	0.615433333333333	-0.757787334555473	0.301951192372576	1	no	-	--	-	-	-	-
Unigene0001050	46	39.6666666666667	2.2432	1.6052	2.3084	2.0174	1.8638	1.1477	2.05226666666667	1.6763	-0.291937838602363	0.596516156907157	1	no	-	--	-	-	-	-
Unigene0001051	5	4.66666666666667	0.0000	0.0000	0.9709	0.0000	0.2787	0.5771	0.323633333333333	0.285266666666667	-0.182049030757714	1	1	no	-	--	-	-	-	-
Unigene0001052	13.3333333333333	12.3333333333333	1.2219	1.9105	0.5389	1.0404	0.8702	1.2011	1.22376666666667	1.03723333333333	-0.238588032635194	0.74228122749171	1	no	-	--	-	-	-	-
Unigene0001053	1800	1637.66666666667	34.1324	26.2420	46.8784	25.1726	27.4139	38.6405	35.7509333333333	30.409	-0.233482532044314	0.539851879389168	1	no	CHCHD7	PREDICTED: coiled-coil-helix-coiled-coil-helix domain-containing protein 7-like [Sinocyclocheilus rhinocerous]	-	-	-	-
Unigene0001054	18	40	0.7055	0.4015	0.4646	2.0959	0.0625	0.9579	0.523866666666667	1.03876666666667	0.987600052556713	0.242545118249195	1	no	-	RNA-directed DNA polymerase from mobile element jockey [Larimichthys crocea]	-	-	-	-
Unigene0001055	635	698	7.6945	12.3859	5.6180	9.5410	9.3213	7.4126	8.56613333333333	8.7583	0.0320067343921202	0.939419446341948	1	no	NDUFV3	PREDICTED: fibrous sheath CABYR-binding protein-like isoform X3 [Sinocyclocheilus rhinocerous]	ko01100//Metabolic pathways//Global and Overview//Metabolism;ko00190//Oxidative phosphorylation//Energy metabolism//Metabolism	-	-	-
Unigene0001056	2.33333333333333	2.66666666666667	0.2559	0.2100	0.0000	0.2346	0.0709	0.1761	0.1553	0.160533333333333	0.0478150616512419	1	1	no	BTN1A1	PREDICTED: E3 ubiquitin-protein ligase TRIM21-like isoform X2 [Sinocyclocheilus rhinocerous]	-	GO:0005623//cell;GO:0044464//cell part	GO:0046914//transition metal ion binding;GO:0043169//cation binding;GO:0043167//ion binding;GO:0005488//binding;GO:0046872//metal ion binding	-
Unigene0001057	2253.33333333333	2140.66666666667	187.7410	94.8647	339.2197	177.8893	183.5377	196.5039	207.275133333333	185.976966666667	-0.156423093667831	0.720382463566559	1	no	-	--	-	-	-	-
Unigene0001058	1911.66666666667	2074.33333333333	12.1805	9.9092	14.3991	13.6306	11.0308	12.2961	12.1629333333333	12.3191666666667	0.0184134624875908	0.958776949625419	1	no	Trim39	PREDICTED: E3 ubiquitin-protein ligase TRIM39-like isoform X1 [Sinocyclocheilus rhinocerous]	-	GO:0005623//cell;GO:0044464//cell part	GO:0005488//binding;GO:0043169//cation binding;GO:0043167//ion binding;GO:0046914//transition metal ion binding;GO:0046872//metal ion binding	-
Unigene0001059	0.666666666666667	2	0.1869	0.0000	0.0000	0.1714	0.0000	0.3429	0.0623	0.171433333333333	1.4603435846073	0.463006373562805	1	no	-	PREDICTED: S-antigen protein-like [Cavia porcellus]	-	-	-	-
Unigene0001060	4	6	0.3617	0.1980	0.5584	0.0829	0.3006	1.1615	0.3727	0.515	0.466557613229093	0.695536145722635	1	no	-	--	-	-	-	-
Unigene0001061	17	20	1.2297	1.2617	1.5817	1.7618	1.1920	1.4807	1.3577	1.47816666666667	0.122644211686023	0.89360099172346	1	no	-	--	-	-	-	-
Unigene0001062	421.333333333333	474.333333333333	4.2125	4.8593	2.9305	3.6208	5.3321	3.8396	4.00076666666667	4.26416666666667	0.0919873374607738	0.823665227726267	1	no	TRIB2	PREDICTED: tribbles homolog 2-like [Cyprinus carpio]	-	-	GO:0001882//nucleoside binding;GO:0016772//transferase activity, transferring phosphorus-containing groups;GO:0001883//purine nucleoside binding;GO:0036094//small molecule binding;GO:0003824//catalytic activity;GO:0032549//ribonucleoside binding;GO:0097367//carbohydrate derivative binding;GO:1901363//heterocyclic compound binding;GO:0097159//organic cyclic compound binding;GO:0016301//kinase acti…	GO:0008152//metabolic process;GO:0044238//primary metabolic process;GO:0044237//cellular metabolic process;GO:0044260//cellular macromolecule metabolic process;GO:0071704//organic substance metabolic process;GO:0044267//cellular protein metabolic process;GO:0019538//protein metabolic process;GO:0036211//protein modification process;GO:0009987//cellular process;GO:0043170//macromolecule metabolic …
Unigene0001063	19.3333333333333	15.3333333333333	0.6023	0.5578	1.6211	0.3824	1.2319	0.5526	0.927066666666667	0.7223	-0.360074918429777	0.615163526695944	1	no	-	--	-	-	-	-
Unigene0001064	6.33333333333333	3.33333333333333	0.6883	0.6457	0.6071	0.3607	0.2179	0.3609	0.647033333333333	0.313166666666667	-1.04690937678966	0.203750213540575	1	no	-	--	-	-	-	-
Unigene0001065	7	10.6666666666667	0.4209	0.4031	0.3248	0.7719	0.4080	0.4344	0.382933333333333	0.5381	0.49078105835288	0.533479669454935	1	no	-	--	-	-	-	-
Unigene0001066	9926.66666666667	10300.3333333333	97.4991	101.6289	97.3876	89.9131	97.0203	101.0021	98.8385333333333	95.9785	-0.042362336578782	0.895351732869452	1	no	SCCPDH	PREDICTED: saccharopine dehydrogenase-like oxidoreductase [Sinocyclocheilus anshuiensis]	-	-	GO:0003824//catalytic activity	GO:0008152//metabolic process;GO:0044699//single-organism process;GO:0044710//single-organism metabolic process
Unigene0001067	3.33333333333333	7.33333333333333	0.1680	0.1839	0.5188	0.4623	0.2793	1.0021	0.290233333333333	0.581233333333333	1.00190422029542	0.289919088823531	1	no	-	--	-	-	-	-
Unigene0001068	133	203.333333333333	1.1367	2.4452	4.5780	5.1397	3.7996	2.6790	2.71996666666667	3.87276666666667	0.509775610647212	0.349560086123579	1	no	-	--	-	-	-	-
Unigene0001069	163	222.333333333333	1.2458	3.3986	4.8794	5.2176	3.9140	2.9171	3.1746	4.01623333333333	0.339268265197693	0.522788266824482	1	no	-	--	-	-	-	-
Unigene0001070	28.3333333333333	20.3333333333333	1.7280	0.0591	2.8896	1.0894	0.4188	1.5853	1.5589	1.03116666666667	-0.596250852065546	0.519160845104739	1	no	-	--	-	-	-	-
Unigene0001071	118.333333333333	129.666666666667	2.5200	3.7702	2.3077	3.3072	3.4833	2.0574	2.86596666666667	2.9493	0.0413507493590642	0.935253902524859	1	no	-	--	-	-	-	-
Unigene0001072	0.333333333333333	0	0.0000	0.1062	0.0000	0.0000	0.0000	0.0000	0.0354	0.001	-5.14567745519564	0.999999999999998	1	no	-	--	-	-	-	-
Unigene0001073	1114	1087	12.8756	15.1435	11.3885	13.2682	13.1622	9.6449	13.1358666666667	12.0251	-0.127462497067825	0.730056807610245	1	no	Clip1	PREDICTED: CAP-Gly domain-containing linker protein 1-like isoform X3 [Sinocyclocheilus grahami]	-	-	-	-
Unigene0001074	11	13.3333333333333	0.1730	0.2650	0.7475	0.5392	0.2299	0.5395	0.395166666666667	0.4362	0.142528512992535	0.872808761373408	1	no	-	--	-	-	-	-
Unigene0001075	0	1.33333333333333	0.0000	0.0000	0.0000	0.0807	0.0000	0.0807	0.001	0.0538	5.74953426766926	0.194737285510044	1	no	-	--	-	-	-	-
Unigene0001076	13.3333333333333	13	0.8063	0.3782	1.1853	0.5809	0.5742	1.0039	0.789933333333333	0.719666666666667	-0.134402064208894	0.871371005698002	1	no	-	--	-	-	-	-
Unigene0001077	27.6666666666667	29.6666666666667	0.7599	0.7004	0.2675	0.3301	0.9084	0.5504	0.575933333333333	0.5963	0.0501365133510506	0.95828116693917	1	no	-	PREDICTED: probable basic-leucine zipper transcription factor H [Oreochromis niloticus]	ko03460//Fanconi anemia pathway//Replication and repair//Genetic Information Processing	-	-	-
Unigene0001078	48	63	1.7337	0.6536	0.4559	0.5829	0.5762	2.2797	0.947733333333333	1.14626666666667	0.274389624936889	0.697239976402695	1	no	Klhdc8a	PREDICTED: kelch domain-containing protein 8A [Danio rerio]	-	-	-	-
Unigene0001079	193.666666666667	262	9.8210	25.4130	7.9407	36.2798	6.9944	8.4952	14.3915666666667	17.2564666666667	0.261913444462341	0.687803303173556	1	no	VMO1	PREDICTED: vitelline membrane outer layer protein 1 homolog [Sinocyclocheilus grahami]	-	-	-	-
Unigene0001080	236.666666666667	308.333333333333	12.1074	6.2879	9.8007	15.8400	13.3705	5.8014	9.39866666666667	11.6706333333333	0.312354844487685	0.519166353355703	1	no	VMO1	PREDICTED: vitelline membrane outer layer protein 1-like [Sinocyclocheilus grahami]	-	-	-	-
Unigene0001081	177	241.666666666667	4.3530	6.2321	2.5182	9.0837	4.0666	3.1949	4.36776666666667	5.4484	0.318936837051132	0.545145769630206	1	no	VMO1	PREDICTED: vitelline membrane outer layer protein 1-like [Sinocyclocheilus grahami]	-	-	-	-
Unigene0001082	87	225.666666666667	10.5790	0.4411	2.2291	19.2628	10.8829	3.0041	4.4164	11.0499333333333	1.32309491533869	0.124176104757619	1	no	VMO1	PREDICTED: vitelline membrane outer layer protein 1-like [Sinocyclocheilus grahami]	-	-	-	-
Unigene0001083	3	0.666666666666667	0.4611	0.0841	0.1582	0.0000	0.0851	0.0705	0.234466666666667	0.0518666666666667	-2.17650327463912	0.182034651577059	1	no	-	--	-	-	-	-
Unigene0001084	208.333333333333	290	1.2957	1.5704	1.8984	2.1682	2.2708	1.7932	1.58816666666667	2.0774	0.387416710627956	0.358060891425326	1	no	-	PREDICTED: RNA-directed DNA polymerase from mobile element jockey-like [Cyprinus carpio]	-	-	-	-
Unigene0001085	11.6666666666667	13.6666666666667	0.8733	0.4779	0.8987	0.6864	1.2439	0.6295	0.749966666666667	0.853266666666667	0.186170215034429	0.821359620569269	1	no	-	--	-	-	-	-
Unigene0001086	305	359.666666666667	3.1246	4.1151	2.7224	4.5843	2.7924	3.4113	3.3207	3.596	0.114905628653762	0.785865047367969	1	no	ASAH1	PREDICTED: acid ceramidase-like isoform X2 [Sinocyclocheilus rhinocerous]	ko01100//Metabolic pathways//Global and Overview//Metabolism;ko04142//Lysosome//Transport and catabolism//Cellular Processes;ko00600//Sphingolipid metabolism//Lipid metabolism//Metabolism	-	GO:0003824//catalytic activity	GO:0044238//primary metabolic process;GO:0008152//metabolic process
Unigene0001087	2476.33333333333	3016	14.2190	24.0719	10.9823	27.7668	17.3188	10.2657	16.4244	18.4504333333333	0.167814031927832	0.701069810568868	1	no	Slc31a1	PREDICTED: LOW QUALITY PROTEIN: high affinity copper uptake protein 1-like [Cyprinus carpio]	-	GO:0016020//membrane;GO:0044425//membrane part;GO:0031224//intrinsic component of membrane	GO:0015075//ion transmembrane transporter activity;GO:0022857//transmembrane transporter activity;GO:0022891//substrate-specific transmembrane transporter activity;GO:0005215//transporter activity;GO:0046915//transition metal ion transmembrane transporter activity;GO:0022890//inorganic cation transmembrane transporter activity;GO:0046873//metal ion transmembrane transporter activity;GO:0008324//c…	GO:0010035//response to inorganic substance;GO:0048545//response to steroid hormone;GO:0000041//transition metal ion transport;GO:0050896//response to stimulus;GO:0051179//localization;GO:0010033//response to organic substance;GO:0009628//response to abiotic stimulus;GO:0009719//response to endogenous stimulus;GO:0006811//ion transport;GO:0033993//response to lipid;GO:0010038//response to metal i…
Unigene0001088	0.333333333333333	0.333333333333333	0.0000	0.0425	0.0000	0.0356	0.0000	0.0000	0.0141666666666667	0.0118666666666667	-0.255585600058666	1	1	no	-	--	-	-	-	-
Unigene0001089	1377.33333333333	1765.66666666667	8.6051	15.9547	12.8430	18.3455	14.3523	11.7032	12.4676	14.8003333333333	0.247445894016637	0.519626122276576	1	no	PROS1	PREDICTED: vitamin K-dependent protein S [Sinocyclocheilus rhinocerous]	-	-	GO:0046872//metal ion binding;GO:0043167//ion binding;GO:0005488//binding;GO:0043169//cation binding	-
Unigene0001090	920.666666666667	1424.66666666667	2.5240	5.3249	3.2163	6.9748	5.6347	3.2830	3.6884	5.2975	0.522316560798818	0.222804004994109	1	no	Phip	PREDICTED: PH-interacting protein isoform X1 [Sinocyclocheilus anshuiensis]	-	-	GO:1901363//heterocyclic compound binding;GO:0003676//nucleic acid binding;GO:0005488//binding;GO:0097159//organic cyclic compound binding	-
Unigene0001091	30.3333333333333	46.6666666666667	0.7723	0.4226	1.0680	0.4869	1.0963	1.7050	0.7543	1.09606666666667	0.539125219765309	0.397828592993516	1	no	-	--	-	-	-	-
Unigene0001092	3.33333333333333	3	0.2056	0.4501	0.4232	0.3771	0.1139	0.3773	0.359633333333333	0.289433333333333	-0.313295663000846	0.867764917333319	1	no	-	--	-	-	-	-
Unigene0001093	67.3333333333333	90.3333333333333	3.9032	3.6804	5.0053	5.5614	4.9228	5.2886	4.1963	5.2576	0.325286563290778	0.4960145597094	1	no	-	--	-	-	-	-
Unigene0001094	47.6666666666667	60.6666666666667	0.9565	1.2971	0.8559	1.3156	1.0366	1.2971	1.0365	1.21643333333333	0.230937139048978	0.654451313194395	1	no	-	PREDICTED: LOW QUALITY PROTEIN: protein FAM111A-like [Sinocyclocheilus grahami]	-	-	-	-
Unigene0001095	223.333333333333	295	6.9504	6.5399	8.3822	8.4786	10.0345	8.7425	7.29083333333333	9.0852	0.317434551789139	0.43937068679613	1	no	-	PREDICTED: uncharacterized protein LOC100496506 [Xenopus tropicalis]	-	-	-	-
Unigene0001096	35.6666666666667	38.3333333333333	1.7014	1.3509	0.6523	0.4283	0.9609	2.2954	1.23486666666667	1.2282	-0.00780976865669993	1	1	no	-	--	-	-	-	-
Unigene0001097	15	14.3333333333333	0.9593	0.2763	1.0911	0.8334	0.6153	0.6485	0.775566666666667	0.699066666666667	-0.149820753582202	0.845262565874101	1	no	-	--	-	-	-	-
Unigene0001098	10.3333333333333	15	0.6101	0.4856	0.6849	0.9663	0.8602	0.6106	0.593533333333333	0.812366666666667	0.452801988530757	0.510414929643242	1	no	-	--	-	-	-	-
Unigene0001099	9458.33333333333	9551.66666666667	73.9635	45.5587	111.5172	44.7133	64.9336	108.9851	77.0131333333333	72.8773333333333	-0.0796343246772342	0.851796531671066	1	no	tmem214-b	PREDICTED: transmembrane protein 214 [Sinocyclocheilus rhinocerous]	-	-	-	-
Unigene0001100	10421	10257.3333333333	38.7205	33.0809	31.9832	29.0219	33.5992	33.4655	34.5948666666667	32.0288666666667	-0.1111852309046	0.732814751396086	1	no	baz1b	PREDICTED: tyrosine-protein kinase BAZ1B-like [Sinocyclocheilus anshuiensis]	-	-	-	-
Unigene0001101	1	1.66666666666667	0.1143	0.0000	0.0588	0.2096	0.0633	0.0000	0.0577	0.0909666666666667	0.656766669907502	0.803420471491443	1	no	-	--	-	-	-	-
Unigene0001102	28.6666666666667	35	1.8348	1.3388	1.7737	1.9374	1.9711	1.7853	1.6491	1.89793333333333	0.202750432039661	0.710570469453648	1	no	-	--	-	-	-	-
Unigene0001103	12.6666666666667	14	1.0129	1.1939	0.8820	0.8574	1.3811	1.0008	1.0296	1.07976666666667	0.0686356266690337	0.95430380851227	1	no	-	--	-	-	-	-
Unigene0001104	26.6666666666667	27	1.0393	1.0616	0.7843	0.6353	0.7676	1.3031	0.961733333333333	0.902	-0.0925094896108264	0.900746291945423	1	no	-	--	-	-	-	-
Unigene0001105	147	670.666666666667	6.0642	10.3965	3.2293	55.4907	12.4969	12.4108	6.56333333333333	26.7994666666667	2.02970367952999	0.0013716243383939	0.284760969430617	no	-	PREDICTED: small ubiquitin-related modifier 1-B-like [Clupea harengus]	-	-	-	-
Unigene0001106	212	191	3.4025	4.0963	2.7692	1.3331	3.2040	4.1431	3.42266666666667	2.8934	-0.242355011805324	0.626356535152597	1	no	-	--	-	-	-	-
Unigene0001107	45	63.3333333333333	1.0127	1.3125	1.4260	1.7594	1.4761	1.6625	1.2504	1.63266666666667	0.384840589730523	0.456966344579532	1	no	-	--	-	-	-	-
Unigene0001108	47.3333333333333	50	1.3565	0.3860	2.2056	0.8458	0.8115	2.2152	1.31603333333333	1.29083333333333	-0.027893292744259	0.988000386133382	1	no	-	--	-	-	-	-
Unigene0001109	237.666666666667	328.333333333333	2.3461	3.9192	2.1370	3.5615	4.7879	2.6158	2.80076666666667	3.65506666666667	0.384075923743116	0.39188595420435	1	no	FHDC1	PREDICTED: FH2 domain-containing protein 1-like [Sinocyclocheilus rhinocerous]	-	-	-	-
Unigene0001110	62.6666666666667	51	0.9634	1.6334	1.1275	0.8315	1.0464	0.9532	1.24143333333333	0.9437	-0.39560658066095	0.451278675025111	1	no	-	--	-	-	-	-
Unigene0001111	40.3333333333333	55	1.9412	3.3386	1.7693	4.1195	3.3795	1.4756	2.3497	2.99153333333333	0.348408567196942	0.559232220898186	1	no	-	--	-	-	-	-
Unigene0001112	15.6666666666667	10.6666666666667	0.6107	0.4177	2.6707	0.9099	0.5074	0.9104	1.23303333333333	0.7759	-0.668269170276977	0.422634460058597	1	no	-	--	-	-	-	-
Unigene0001113	0	0.333333333333333	0.0000	0.0000	0.0000	0.0000	0.0000	0.0519	0.001	0.0173	4.11270013274936	1	1	no	-	--	-	-	-	-
Unigene0001114	118.666666666667	97	3.6615	3.9406	3.7051	2.6021	3.8536	2.3514	3.76906666666667	2.9357	-0.360502767088283	0.438622802450556	1	no	-	--	-	-	-	-
Unigene0001115	152	207.666666666667	12.0181	11.9073	6.1186	16.7625	10.7916	10.4454	10.0146666666667	12.6665	0.338903532337168	0.47287461377291	1	no	-	PREDICTED: keratinocyte-associated transmembrane protein 2 [Sinocyclocheilus grahami]	-	-	-	-
Unigene0001116	15.6666666666667	23.6666666666667	1.5884	2.5566	0.4808	2.9131	2.6914	0.9429	1.54193333333333	2.18246666666667	0.5012192288198	0.514128551260212	1	no	-	--	-	-	-	-
Unigene0001117	1554.33333333333	1792.66666666667	5.9087	1.8697	10.9633	3.6109	5.3870	11.2586	6.24723333333333	6.75216666666667	0.112133099776335	0.842715950399344	1	no	SLC24A4	PREDICTED: sodium/potassium/calcium exchanger 4-like isoform X3 [Sinocyclocheilus anshuiensis]	-	GO:0016020//membrane;GO:0044425//membrane part;GO:0031224//intrinsic component of membrane	-	GO:0009987//cellular process;GO:0044763//single-organism cellular process;GO:0044699//single-organism process
Unigene0001118	0	0	0.0000	0.0000	0.0000	0.0000	0.0000	0.0000	0.001	0.001	0	notest	notest	notest	-	--	-	-	-	-
Unigene0001119	20.6666666666667	22	0.3348	0.4885	0.6201	0.6344	0.3214	0.4504	0.481133333333333	0.468733333333333	-0.0376693602822118	1	1	no	-	--	-	-	-	-
Unigene0001120	1370.33333333333	1556.66666666667	35.7964	34.8829	26.8820	37.6361	37.6099	28.9473	32.5204333333333	34.7311	0.0948816229512266	0.792058381966407	1	no	lamtor4	PREDICTED: ragulator complex protein LAMTOR4 [Sinocyclocheilus grahami]	-	GO:0012505//endomembrane system;GO:0000323//lytic vacuole;GO:0043226//organelle;GO:0044424//intracellular part;GO:0016020//membrane;GO:0044446//intracellular organelle part;GO:0044440//endosomal part;GO:0098805//whole membrane;GO:0005737//cytoplasm;GO:0044444//cytoplasmic part;GO:0043231//intracellular membrane-bounded organelle;GO:0031090//organelle membrane;GO:0043229//intracellular organelle;G…	GO:0005515//protein binding;GO:0005488//binding	GO:0065007//biological regulation;GO:0008104//protein localization;GO:0044699//single-organism process;GO:0023052//signaling;GO:0033036//macromolecule localization;GO:0051641//cellular localization;GO:0051179//localization;GO:1901700//response to oxygen-containing compound;GO:0009719//response to endogenous stimulus;GO:0031929//TOR signaling;GO:0010243//response to organonitrogen compound;GO:0044…
Unigene0001121	108	119	2.1053	2.3493	2.5063	1.8359	3.7500	1.8178	2.3203	2.4679	0.0889725885787511	0.863938715176462	1	no	-	--	-	-	-	-
Unigene0001122	25.6666666666667	15.6666666666667	1.7270	0.5930	0.3485	0.5900	0.5252	0.4349	0.8895	0.5167	-0.783667721729662	0.26894800098878	1	no	-	--	-	-	-	-
Unigene0001123	3259	2968	34.8281	30.3799	33.0395	21.6433	29.9255	32.6808	32.7491666666667	28.0832	-0.221750860419176	0.519823334074554	1	no	GMCL1	PREDICTED: germ cell-less protein-like 1 [Sinocyclocheilus rhinocerous]	-	-	-	-
Unigene0001124	60.3333333333333	65	1.0682	1.3011	0.8865	0.8847	1.1261	1.2645	1.08526666666667	1.09176666666667	0.00861497661759305	0.987565805055071	1	no	Tf2-9	PREDICTED: adhesion G protein-coupled receptor E1-like [Danio rerio]	ko03013//RNA transport//Translation//Genetic Information Processing	-	-	-
Unigene0001125	29	30	0.5028	1.5639	0.3812	1.3830	0.7622	0.1699	0.815966666666667	0.7717	-0.080470111626102	0.932833682868627	1	no	-	--	-	-	-	-
Unigene0001126	10.6666666666667	18.6666666666667	0.1384	0.3535	1.0447	1.3540	0.4601	0.6350	0.5122	0.816366666666667	0.672510023486612	0.411795977638424	1	no	-	PREDICTED: uncharacterized protein LOC109091437 isoform X3 [Cyprinus carpio]	-	-	-	-
Unigene0001127	13	33.3333333333333	0.6454	1.4128	0.8856	2.3674	1.8273	2.6975	0.981266666666667	2.2974	1.22728490785134	0.0460640563586025	1	no	-	PREDICTED: myosin-IIIa-like [Sinocyclocheilus rhinocerous]	-	-	-	-
Unigene0001128	1032	1427.66666666667	14.0816	15.2420	20.5871	23.5212	19.3630	21.3701	16.6369	21.4181	0.364443867135466	0.318908635727634	1	no	-	PREDICTED: RNA-directed DNA polymerase from mobile element jockey-like, partial [Cynoglossus semilaevis]	-	-	-	-
Unigene0001129	173.666666666667	237.666666666667	6.8289	5.5818	10.8969	6.4997	9.4808	13.9179	7.7692	9.96613333333333	0.359267824495848	0.454547431625495	1	no	-	PREDICTED: myosin-IIIa-like [Sinocyclocheilus rhinocerous]	-	-	-	-
Unigene0001130	173	257.333333333333	12.2381	6.8310	13.6642	13.5226	14.1682	18.0764	10.9111	15.2557333333333	0.483554977052937	0.284999428388712	1	no	-	PREDICTED: myosin-IIIa-like [Sinocyclocheilus rhinocerous]	-	-	-	-
Unigene0001131	41.3333333333333	37.6666666666667	2.2469	2.2453	1.8096	1.4333	2.1105	1.8821	2.1006	1.80863333333333	-0.215901509502463	0.69156429298614	1	no	-	--	-	-	-	-
Unigene0001132	12	9.33333333333333	0.0000	1.8661	0.4235	0.7009	0.4559	0.4315	0.7632	0.529433333333333	-0.527612140996727	0.62777336457983	1	no	-	--	-	-	-	-
Unigene0001133	81	84.3333333333333	2.3263	2.3169	1.2448	2.0265	1.5721	2.0701	1.96266666666667	1.88956666666667	-0.0547597507937075	0.924290068580543	1	no	-	PREDICTED: GRIP and coiled-coil domain-containing protein 2-like [Sinocyclocheilus grahami]	-	-	-	-
Unigene0001134	4	4.33333333333333	0.1132	0.4954	0.1164	0.2075	0.3134	0.2076	0.241666666666667	0.242833333333333	0.00694797716221186	1	1	no	-	--	-	-	-	-
Unigene0001135	290.333333333333	421	5.5583	6.1947	6.7045	7.8599	8.5036	8.6856	6.1525	8.3497	0.440551610617332	0.262217958208541	1	no	NKTR	Nktr protein, partial [Danio rerio]	-	-	GO:0016859//cis-trans isomerase activity;GO:0003824//catalytic activity;GO:0016853//isomerase activity	-
Unigene0001136	22.6666666666667	26	0.9236	0.5776	1.5841	1.3309	0.8770	1.0894	1.02843333333333	1.0991	0.0958743774232486	0.920867322342845	1	no	-	--	-	-	-	-
Unigene0001137	174.666666666667	181.333333333333	7.2427	6.2694	4.4041	7.0640	6.1273	4.2888	5.97206666666667	5.8267	-0.0355512380993717	0.942560366385076	1	no	-	--	-	-	-	-
Unigene0001138	252.333333333333	192.666666666667	8.4226	9.7514	9.2762	8.2020	9.7937	2.1393	9.15006666666667	6.71166666666667	-0.447111188347792	0.401765332994951	1	no	-	--	-	-	-	-
Unigene0001139	3.33333333333333	11.6666666666667	0.1778	0.1946	0.2439	1.0868	0.5252	0.3806	0.205433333333333	0.6642	1.69294743245526	0.0464346267038832	1	no	-	--	-	-	-	-
Unigene0001140	12	9	0.4860	0.3546	1.1670	0.4457	0.4786	0.4954	0.6692	0.473233333333333	-0.499885748408213	0.520499688841393	1	no	-	--	-	-	-	-
Unigene0001141	0	0	0.0000	0.0000	0.0000	0.0000	0.0000	0.0000	0.001	0.001	0	notest	notest	notest	-	--	-	-	-	-
Unigene0001142	327	357	8.0481	2.2302	10.4001	7.0402	7.6847	6.8170	6.8928	7.18063333333333	0.0590209406640801	0.911011752820724	1	no	-	hypothetical protein cypCar_00037063 [Cyprinus carpio]	-	-	-	-
Unigene0001143	34	36.3333333333333	0.5690	0.7185	1.0359	0.7224	0.8485	0.7629	0.774466666666667	0.777933333333333	0.00644337944074706	1	1	no	-	--	-	-	-	-
Unigene0001144	25.3333333333333	18	3.3580	2.2700	2.1343	2.0830	1.9695	1.1779	2.58743333333333	1.74346666666667	-0.569562909749716	0.343091052116764	1	no	-	--	-	-	-	-
Unigene0001145	0.333333333333333	0	0.1033	0.0000	0.0000	0.0000	0.0000	0.0000	0.0344333333333333	0.001	-5.10573394325654	0.999999999999998	1	no	-	--	-	-	-	-
Unigene0001146	140.666666666667	175.666666666667	8.4214	8.2819	10.0477	8.1139	11.4931	11.8690	8.917	10.492	0.234659390406073	0.597865984480661	1	no	-	--	-	-	-	-
Unigene0001147	9.33333333333333	8.66666666666667	0.6870	0.6683	0.8641	0.7000	0.5920	0.6303	0.7398	0.640766666666667	-0.207336201225764	0.812456587460206	1	no	-	--	-	-	-	-
Unigene0001148	445	416.333333333333	1.3741	0.7352	2.5557	0.7218	1.0562	2.2909	1.555	1.3563	-0.197238256865191	0.715445959657945	1	no	Pol	pol-like protein [Danio rerio]	-	-	-	-
Unigene0001149	14.6666666666667	15.6666666666667	0.2400	0.1751	1.3994	0.5868	0.4431	0.7706	0.604833333333333	0.600166666666667	-0.0111744572890521	1	1	no	-	--	-	-	-	-
Unigene0001150	189.333333333333	218.666666666667	5.8756	5.0596	6.6295	5.9621	5.9476	7.0595	5.8549	6.32306666666667	0.110979900390849	0.795456847098294	1	no	-	--	-	-	-	-
Unigene0001151	30	45.6666666666667	1.9432	1.7514	1.6468	2.6728	1.7729	3.0411	1.78046666666667	2.4956	0.48713128827017	0.378122991075782	1	no	-	--	-	-	-	-
Unigene0001152	16.3333333333333	7.66666666666667	0.3543	0.7325	0.9318	0.2166	0.0872	0.5417	0.672866666666667	0.281833333333333	-1.25547839892117	0.113223857475652	1	no	-	--	-	-	-	-
Unigene0001153	96	72.6666666666667	5.4109	5.4435	5.5119	4.4605	3.2092	3.8108	5.45543333333333	3.82683333333333	-0.511542726591452	0.277748230121793	1	no	-	--	-	-	-	-
Unigene0001154	452.333333333333	661.333333333333	2.4337	3.1265	2.2274	4.9166	3.5299	2.1571	2.59586666666667	3.53453333333333	0.44530346459586	0.292353939132075	1	no	HIP1R	PREDICTED: huntingtin-interacting protein 1-related protein [Sinocyclocheilus rhinocerous]	-	-	GO:0005488//binding;GO:0008289//lipid binding	-
Unigene0001155	634.666666666667	795	13.0439	10.8804	9.0287	13.9799	11.1245	13.2981	10.9843333333333	12.8008333333333	0.220790420978956	0.560169914566801	1	no	STX8	PREDICTED: syntaxin-8-like isoform X1 [Sinocyclocheilus rhinocerous]	ko04130//SNARE interactions in vesicular transport//Folding, sorting and degradation//Genetic Information Processing	-	-	-
Unigene0001156	44.6666666666667	62.3333333333333	1.2638	2.2633	1.8522	4.0384	1.5274	1.2648	1.7931	2.27686666666667	0.344593861115716	0.563942572266967	1	no	-	--	-	-	-	-
Unigene0001157	8.33333333333333	6	1.5156	0.3555	0.8913	0.2978	0.8396	0.7946	0.9208	0.644	-0.515827145130251	0.62319236879937	1	no	-	--	-	-	-	-
Unigene0001158	16.3333333333333	22	0.8042	0.8802	0.5977	0.8604	1.5839	0.5329	0.7607	0.9924	0.383594130181124	0.584478407664401	1	no	-	--	-	-	-	-
Unigene0001159	57.6666666666667	122.666666666667	0.6893	2.0622	1.4424	5.3728	1.6801	0.9908	1.39796666666667	2.68123333333333	0.939566813503107	0.156053744903074	1	no	-	--	-	-	-	-
Unigene0001160	70.3333333333333	29.6666666666667	4.5955	2.1627	3.2158	0.5900	1.7310	1.7286	3.32466666666667	1.34986666666667	-1.30039279044179	0.0283816638169116	1	no	-	--	-	-	-	-
Unigene0001161	112	115	2.4203	4.1552	1.8069	3.1549	2.7076	2.1116	2.79413333333333	2.65803333333333	-0.0720416694092136	0.891273095851465	1	no	-	--	-	-	-	-
Unigene0001162	1925.66666666667	1549	32.6230	22.0797	51.2427	25.7456	23.3926	30.5808	35.3151333333333	26.573	-0.41032543113537	0.300126844798492	1	no	-	--	-	-	-	-
Unigene0001163	98.3333333333333	90	3.2898	2.0486	3.2979	1.8984	3.9902	1.8213	2.87876666666667	2.56996666666667	-0.163701211248951	0.752816413788652	1	no	-	PREDICTED: large proline-rich protein BAG6-like [Cyprinus carpio]	-	-	-	-
Unigene0001164	120	146.666666666667	2.3399	2.5609	3.7667	2.5492	4.5685	3.0180	2.88916666666667	3.37856666666667	0.225757892289227	0.637413582472702	1	no	-	PREDICTED: adhesion G protein-coupled receptor E1-like [Danio rerio]	-	-	-	-
Unigene0001165	163	207.333333333333	3.2923	1.6134	1.2768	1.6559	2.7220	3.0994	2.06083333333333	2.49243333333333	0.274327082582706	0.584221527116442	1	no	Tf2-8	Retrotransposable element Tf2 protein type 1 [Larimichthys crocea]	ko03013//RNA transport//Translation//Genetic Information Processing	-	-	-
Unigene0001166	982.666666666667	1118.33333333333	16.3486	12.8535	10.3285	12.7260	15.2031	14.4884	13.1768666666667	14.1391666666667	0.10168974118751	0.785535790279866	1	no	GTF3C5	PREDICTED: general transcription factor 3C polypeptide 5 [Sinocyclocheilus rhinocerous]	-	-	-	-
Unigene0001167	12	12.6666666666667	0.9720	0.7979	1.2503	0.8170	1.9742	0.3716	1.00673333333333	1.05426666666667	0.0665582406579521	0.958753564327667	1	no	-	--	-	-	-	-
Unigene0001168	701.333333333333	714	25.6484	26.4980	17.8478	21.2637	25.7254	20.1899	23.3314	22.393	-0.0592250591709719	0.877936618988494	1	no	HSBP1	PREDICTED: heat shock factor-binding protein 1-like [Sinocyclocheilus grahami]	-	-	-	-
Unigene0001169	16	29.6666666666667	0.3024	0.5116	0.5659	0.6303	1.1270	0.6811	0.459966666666667	0.8128	0.821371087847309	0.186226791464908	1	no	-	PREDICTED: docking protein 1-like [Cyprinus carpio]	-	-	-	-
Unigene0001170	17.6666666666667	31	0.7645	0.7607	0.3934	1.1790	0.9240	1.0202	0.639533333333333	1.04106666666667	0.702970995916487	0.246986427577174	1	no	-	--	-	-	-	-
Unigene0001171	19	17.3333333333333	0.5608	1.1803	0.8434	0.4747	1.0992	0.6728	0.8615	0.7489	-0.202077706785896	0.805227909493828	1	no	-	--	-	-	-	-
Unigene0001172	9.33333333333333	11.6666666666667	0.2768	0.2754	0.1812	0.5306	0.0557	0.2308	0.244466666666667	0.272366666666667	0.155912385975708	0.906238204715692	1	no	Ephb2	PREDICTED: ephrin type-B receptor 2 isoform X1 [Danio rerio]	-	-	-	-
Unigene0001173	18	13.6666666666667	1.4105	0.3308	1.0368	0.6005	0.2790	1.0630	0.926033333333333	0.6475	-0.516183932618468	0.495987157297623	1	no	-	--	-	-	-	-
Unigene0001174	24.6666666666667	46	1.2557	0.9162	1.0337	2.9553	0.9738	1.5360	1.06853333333333	1.8217	0.769653479585674	0.19991720194645	1	no	-	--	-	-	-	-
Unigene0001175	56	57.3333333333333	1.7720	1.8200	1.1783	1.2749	1.8725	1.4756	1.5901	1.541	-0.0452506363408962	0.933339448473298	1	no	-	--	-	-	-	-
Unigene0001176	2.33333333333333	5.66666666666667	0.1542	0.1266	0.0000	0.3889	0.2136	0.0354	0.0936	0.212633333333333	1.18378734287485	0.363814043130739	1	no	-	--	-	-	-	-
Unigene0001177	383.333333333333	591	23.8182	2.8965	0.2389	13.6025	27.4416	1.4269	8.98453333333333	14.157	0.656000101701688	0.538892269825818	1	no	pxn1	PREDICTED: fucolectin-4-like [Sinocyclocheilus grahami]	-	-	-	-
Unigene0001178	113.333333333333	200	8.6367	2.0280	0.1939	6.4797	12.3865	0.5474	3.61953333333333	6.4712	0.838229563551636	0.405527270680395	1	no	-	--	-	-	-	-
Unigene0001179	107.333333333333	183.333333333333	0.7591	0.9895	1.1147	1.0559	1.6064	1.9172	0.954433333333333	1.5265	0.67751125477389	0.145296308262923	1	no	TBX18	PREDICTED: T-box transcription factor TBX18-like isoform X2 [Sinocyclocheilus rhinocerous]	-	GO:0043231//intracellular membrane-bounded organelle;GO:0043226//organelle;GO:0044424//intracellular part;GO:0005622//intracellular;GO:0043227//membrane-bounded organelle;GO:0044464//cell part;GO:0043229//intracellular organelle;GO:0005623//cell	GO:0003676//nucleic acid binding;GO:1901363//heterocyclic compound binding;GO:0005488//binding;GO:0097159//organic cyclic compound binding	GO:0043170//macromolecule metabolic process;GO:0006807//nitrogen compound metabolic process;GO:0006139//nucleobase-containing compound metabolic process;GO:0034645//cellular macromolecule biosynthetic process;GO:0090304//nucleic acid metabolic process;GO:1901360//organic cyclic compound metabolic process;GO:0016070//RNA metabolic process;GO:0044260//cellular macromolecule metabolic process;GO:003…
Unigene0001180	1.33333333333333	9	0.0919	0.0335	0.0000	0.1124	0.5091	0.2249	0.0418	0.282133333333333	2.75480227931199	0.0173397661769281	0.88077315940022	no	-	PREDICTED: Hermansky-Pudlak syndrome 5 protein [Callorhinchus milii]	-	-	-	-
Unigene0001181	6.66666666666667	8.66666666666667	0.1258	0.8261	0.3884	0.8652	0.3484	0.3462	0.446766666666667	0.519933333333333	0.218805100367611	0.824187002716903	1	no	-	--	-	-	-	-
Unigene0001182	6	8	1.0631	0.3173	0.3978	0.8862	0.6424	0.7093	0.592733333333333	0.745966666666667	0.331727973340845	0.719879672863572	1	no	-	PREDICTED: neuron navigator 3-like [Poecilia mexicana]	ko03013//RNA transport//Translation//Genetic Information Processing	-	-	-
Unigene0001183	421	442	6.6059	4.3611	6.3074	4.1273	5.4851	7.4328	5.75813333333333	5.68173333333333	-0.0192700742148821	0.965035363864754	1	no	fuz	PREDICTED: protein fuzzy homolog [Sinocyclocheilus rhinocerous]	-	-	-	-
Unigene0001184	2302.66666666667	2171	11.7542	11.2642	13.7852	9.5880	11.2088	11.7815	12.2678666666667	10.8594333333333	-0.175935569437408	0.606982346309097	1	no	Sp4	PREDICTED: LOW QUALITY PROTEIN: transcription factor Sp4-like [Cyprinus carpio]	-	-	GO:0097159//organic cyclic compound binding;GO:0005488//binding	-
Unigene0001185	0	0	0.0000	0.0000	0.0000	0.0000	0.0000	0.0000	0.001	0.001	0	notest	notest	notest	-	novel protein similar to DNA polymerases [Danio rerio]	-	-	-	-
Unigene0001186	665.666666666667	843.666666666667	26.8046	17.3513	16.4353	25.5752	23.6133	23.0290	20.1970666666667	24.0725	0.253240200226224	0.511285669703105	1	no	-	--	-	-	-	-
Unigene0001187	26.3333333333333	33.3333333333333	0.6729	0.8680	0.4451	0.7052	0.9052	0.7496	0.662	0.786666666666667	0.24892123672083	0.684414338029041	1	no	-	--	-	-	-	-
Unigene0001188	22.3333333333333	28.6666666666667	1.8041	0.9507	1.8566	2.2671	2.7390	0.7356	1.53713333333333	1.9139	0.316273139872733	0.661268444202454	1	no	-	--	-	-	-	-
Unigene0001189	0.333333333333333	2.33333333333333	0.1083	0.0000	0.0000	0.0000	0.7196	0.0993	0.0361	0.272966666666667	2.91865404492436	0.230850460487388	1	no	-	--	-	-	-	-
Unigene0001190	4	1.66666666666667	0.8264	0.0000	0.4252	0.1894	0.1144	0.1895	0.4172	0.164433333333333	-1.34323637124643	0.373815941681561	1	no	-	--	-	-	-	-
Unigene0001191	165.666666666667	143	2.6992	3.2982	3.5767	2.6616	1.6795	3.2226	3.19136666666667	2.52123333333333	-0.340044732239283	0.461719477786385	1	no	-	PREDICTED: myosin-IIIa-like [Sinocyclocheilus rhinocerous]	-	-	-	-
Unigene0001192	32.3333333333333	34	1.0587	0.9395	0.8833	0.5510	1.2362	1.1025	0.9605	0.963233333333333	0.00409970449688309	1	1	no	-	--	-	-	-	-
Unigene0001193	3.33333333333333	3	0.1071	0.1172	0.0551	0.1228	0.0000	0.0983	0.0931333333333333	0.0737	-0.337632995593237	0.879709327063236	1	no	-	--	-	-	-	-
Unigene0001194	529.666666666667	500	3.3674	5.6229	4.7108	5.3075	4.1046	2.6211	4.56703333333333	4.01106666666667	-0.187271374601658	0.658499669414567	1	no	Irf2	PREDICTED: interferon regulatory factor 2-like [Sinocyclocheilus anshuiensis]	-	-	-	-
Unigene0001195	26.3333333333333	33	0.8171	1.0373	0.8408	1.1388	0.4707	1.4392	0.8984	1.01623333333333	0.177801858819852	0.781093226833627	1	no	-	--	-	-	-	-
Unigene0001196	2241.33333333333	1589.33333333333	46.3207	11.3199	60.1780	22.5486	27.8115	29.3150	39.2728666666667	26.5583666666667	-0.564366485300857	0.256346877541443	1	no	QRICH2	PREDICTED: neurofilament heavy polypeptide-like [Sinocyclocheilus anshuiensis]	-	-	-	-
Unigene0001197	0	0	0.0000	0.0000	0.0000	0.0000	0.0000	0.0000	0.001	0.001	0	notest	notest	notest	-	--	-	-	-	-
Unigene0001198	73	84.6666666666667	0.8639	1.5251	0.8173	1.0094	1.0806	1.3423	1.06876666666667	1.1441	0.0982662383198104	0.853429271588918	1	no	-	--	-	-	-	-
Unigene0001199	320	465.666666666667	0.6131	1.3828	0.7022	1.6058	1.1782	0.8339	0.899366666666667	1.20596666666667	0.423208711868905	0.35753542613489	1	no	LRRK2	PREDICTED: leucine-rich repeat serine/threonine-protein kinase 2-like [Sinocyclocheilus rhinocerous]	-	GO:0044464//cell part;GO:0005623//cell	GO:0097159//organic cyclic compound binding;GO:0097367//carbohydrate derivative binding;GO:0016301//kinase activity;GO:0032550//purine ribonucleoside binding;GO:0032549//ribonucleoside binding;GO:0016740//transferase activity;GO:0001882//nucleoside binding;GO:0003824//catalytic activity;GO:0036094//small molecule binding;GO:0004672//protein kinase activity;GO:0001883//purine nucleoside binding;GO…	GO:0009987//cellular process;GO:0007154//cell communication;GO:0043170//macromolecule metabolic process;GO:0043412//macromolecule modification;GO:0044260//cellular macromolecule metabolic process;GO:0044237//cellular metabolic process;GO:0007165//signal transduction;GO:0035556//intracellular signal transduction;GO:0044238//primary metabolic process;GO:0071704//organic substance metabolic process;…
Unigene0001200	25269	20297.3333333333	306.8859	240.2204	206.1554	144.6369	227.2193	202.6561	251.087233333333	191.5041	-0.390813396054387	0.259022839452329	1	no	Cct7	PREDICTED: T-complex protein 1 subunit eta-like [Sinocyclocheilus anshuiensis]	-	GO:0005622//intracellular;GO:0005623//cell;GO:0044424//intracellular part;GO:0044464//cell part	GO:0097367//carbohydrate derivative binding;GO:0097159//organic cyclic compound binding;GO:0001883//purine nucleoside binding;GO:0005488//binding;GO:0001882//nucleoside binding;GO:1901363//heterocyclic compound binding;GO:0005515//protein binding;GO:0036094//small molecule binding;GO:0032550//purine ribonucleoside binding;GO:0032549//ribonucleoside binding	GO:0043170//macromolecule metabolic process;GO:0044267//cellular protein metabolic process;GO:0044260//cellular macromolecule metabolic process;GO:0009987//cellular process;GO:0071704//organic substance metabolic process;GO:0044237//cellular metabolic process;GO:0008152//metabolic process;GO:0019538//protein metabolic process;GO:0044238//primary metabolic process
Unigene0001201	17	24.3333333333333	0.6212	2.6345	0.9589	1.2104	1.9785	2.3508	1.40486666666667	1.84656666666667	0.394412135769731	0.583497690646165	1	no	-	--	-	-	-	-
Unigene0001202	2447.66666666667	3198	6.7326	7.8958	8.6885	8.6509	9.5937	10.2384	7.7723	9.49433333333333	0.28872511372249	0.394148544460626	1	no	ago3	PREDICTED: protein argonaute-3 isoform X2 [Esox lucius]	-	GO:0032991//macromolecular complex;GO:0005622//intracellular;GO:0031332//RNAi effector complex;GO:0044424//intracellular part;GO:0005623//cell;GO:0044464//cell part;GO:0030529//intracellular ribonucleoprotein complex;GO:1990904//ribonucleoprotein complex	GO:0003723//RNA binding;GO:1901363//heterocyclic compound binding;GO:0097159//organic cyclic compound binding;GO:0005488//binding;GO:0003676//nucleic acid binding	GO:0060255//regulation of macromolecule metabolic process;GO:1901576//organic substance biosynthetic process;GO:0019538//protein metabolic process;GO:0044763//single-organism cellular process;GO:0071704//organic substance metabolic process;GO:0051172//negative regulation of nitrogen compound metabolic process;GO:0010467//gene expression;GO:0065007//biological regulation;GO:0032269//negative regul…
Unigene0001203	414.666666666667	568.333333333333	4.4712	4.0169	4.6011	5.9036	5.9756	5.0042	4.36306666666667	5.6278	0.367228541247945	0.334595605274712	1	no	ago3	PREDICTED: protein argonaute-3-like isoform X1 [Clupea harengus]	-	GO:0032991//macromolecular complex;GO:1990904//ribonucleoprotein complex;GO:0030529//intracellular ribonucleoprotein complex;GO:0044424//intracellular part;GO:0005623//cell;GO:0044464//cell part;GO:0005622//intracellular;GO:0031332//RNAi effector complex	GO:0005488//binding;GO:0003723//RNA binding;GO:0097159//organic cyclic compound binding;GO:0003676//nucleic acid binding;GO:1901363//heterocyclic compound binding	GO:0044237//cellular metabolic process;GO:0043170//macromolecule metabolic process;GO:0043603//cellular amide metabolic process;GO:0065007//biological regulation;GO:0010556//regulation of macromolecule biosynthetic process;GO:0044249//cellular biosynthetic process;GO:0051246//regulation of protein metabolic process;GO:0051248//negative regulation of protein metabolic process;GO:0009892//negative …
Unigene0001204	2	1.33333333333333	0.1975	0.1081	0.3049	0.2717	0.0000	0.0906	0.2035	0.120766666666667	-0.752806489421474	0.816693115545177	1	no	Prkag2	PREDICTED: 5'-AMP-activated protein kinase subunit gamma-2 isoform X2 [Lepisosteus oculatus]	ko04068//FoxO signaling pathway//Signal transduction//Environmental Information Processing;ko04910//Insulin signaling pathway//Endocrine system//Organismal Systems;ko04920//Adipocytokine signaling pathway//Endocrine system//Organismal Systems	-	-	-
Unigene0001205	2.66666666666667	2	0.0000	0.1540	0.1448	0.1613	0.0390	0.0000	0.0996	0.0667666666666667	-0.577017726976529	0.879026188392797	1	no	-	--	-	-	-	-
Unigene0001206	4	7.33333333333333	0.2015	0.2205	0.2074	0.7853	0.0558	0.1849	0.2098	0.342	0.704981647195993	0.514746575514788	1	no	-	--	-	-	-	-
Unigene0001207	57.6666666666667	108	0.4878	1.2842	0.6377	3.1795	0.2045	0.5685	0.803233333333333	1.3175	0.713911915901352	0.366474102369857	1	no	myadm	PREDICTED: myeloid-associated differentiation marker-like [Sinocyclocheilus anshuiensis]	-	-	-	-
Unigene0001208	148.333333333333	138	1.6883	1.4755	2.4372	1.3365	1.5743	1.9723	1.867	1.6277	-0.197887105352523	0.67402860176911	1	no	TPH1	PREDICTED: tryptophan 5-hydroxylase 1 isoform X1 [Sinocyclocheilus rhinocerous]	ko01100//Metabolic pathways//Global and Overview//Metabolism;ko00380//Tryptophan metabolism//Amino acid metabolism//Metabolism	-	GO:0016714//oxidoreductase activity, acting on paired donors, with incorporation or reduction of molecular oxygen, reduced pteridine as one donor, and incorporation of one atom of oxygen;GO:0004497//monooxygenase activity;GO:0046872//metal ion binding;GO:0046914//transition metal ion binding;GO:0005488//binding;GO:0043168//anion binding;GO:0036094//small molecule binding;GO:0031406//carboxylic ac…	GO:0042428//serotonin metabolic process;GO:0008152//metabolic process;GO:0006725//cellular aromatic compound metabolic process;GO:0044699//single-organism process;GO:0006807//nitrogen compound metabolic process;GO:1901564//organonitrogen compound metabolic process;GO:0006520//cellular amino acid metabolic process;GO:0044237//cellular metabolic process;GO:0044238//primary metabolic process;GO:0046…
Unigene0001209	8.66666666666667	11.3333333333333	0.2537	0.2083	1.2402	0.1163	1.0541	0.9893	0.5674	0.7199	0.343430367715272	0.758493756888755	1	no	PLAU	PREDICTED: urokinase-type plasminogen activator-like [Sinocyclocheilus anshuiensis]	-	-	GO:0004175//endopeptidase activity;GO:0016787//hydrolase activity;GO:0008233//peptidase activity;GO:0016740//transferase activity;GO:0070011//peptidase activity, acting on L-amino acid peptides;GO:0003824//catalytic activity;GO:0016772//transferase activity, transferring phosphorus-containing groups	GO:0016485//protein processing;GO:0006793//phosphorus metabolic process;GO:0006508//proteolysis;GO:0019538//protein metabolic process;GO:0006796//phosphate-containing compound metabolic process;GO:0009987//cellular process;GO:0044237//cellular metabolic process;GO:0031638//zymogen activation;GO:0010467//gene expression;GO:0071704//organic substance metabolic process;GO:0043170//macromolecule meta…
Unigene0001210	20.6666666666667	66	0.3420	2.3709	1.0560	6.6912	2.0210	1.9874	1.2563	3.56653333333333	1.50534144141258	0.0438016885455573	1	no	-	PREDICTED: uncharacterized protein LOC107552172 isoform X1 [Sinocyclocheilus grahami]	-	-	-	-
Unigene0001211	15.3333333333333	17	0.4057	0.8881	0.3479	0.2790	0.4870	0.8996	0.547233333333333	0.5552	0.0208514568991781	0.999999999999999	1	no	Tf2-6	PREDICTED: uncharacterized mitochondrial protein AtMg00860-like [Sinocyclocheilus anshuiensis]	-	-	-	-
Unigene0001212	357.333333333333	414.666666666667	1.5394	2.6184	3.3055	2.2855	3.0713	2.7757	2.48776666666667	2.71083333333333	0.12388523840349	0.77410767833714	1	no	RUNX1T1	PREDICTED: protein CBFA2T1 isoform X1 [Sinocyclocheilus anshuiensis]	-	-	-	-
Unigene0001213	139	118.333333333333	8.4376	2.8821	11.6692	3.5482	6.2516	8.7763	7.66296666666667	6.19203333333333	-0.307489792192402	0.59693840134849	1	no	-	--	-	-	-	-
Unigene0001214	52	46.3333333333333	1.4332	1.6289	1.4181	1.2131	1.9237	0.7080	1.4934	1.2816	-0.220654583293482	0.695062566348627	1	no	-	--	-	-	-	-
Unigene0001215	0	1.66666666666667	0.0000	0.0000	0.0000	0.0969	0.0000	0.1455	0.001	0.0808	6.33628338786443	0.127982701687172	1	no	-	PREDICTED: uncharacterized protein LOC107656688 [Sinocyclocheilus anshuiensis]	-	-	-	-
Unigene0001216	1321.33333333333	1679.33333333333	4.7257	4.7570	4.6029	5.7308	5.9055	5.1694	4.6952	5.6019	0.254729616740826	0.462831259443749	1	no	GLTSCR1	PREDICTED: glioma tumor suppressor candidate region gene 1 protein-like isoform X3 [Sinocyclocheilus rhinocerous]	-	-	-	-
Unigene0001217	55655.3333333333	55255.3333333333	346.4951	151.0082	391.9060	164.7230	271.9008	398.1834	296.469766666667	278.269066666667	-0.0914044467036526	0.831999839489312	1	no	pim2	PREDICTED: serine/threonine-protein kinase pim-2-like [Cyprinus carpio]	-	-	-	-
Unigene0001218	181.666666666667	178.333333333333	3.4141	5.8797	5.0375	5.0413	4.5333	3.5237	4.7771	4.3661	-0.129789903539329	0.77864903764392	1	no	-	--	-	-	-	-
Unigene0001219	95.6666666666667	127.666666666667	1.5807	3.3182	2.9066	3.8018	1.6937	3.8988	2.60183333333333	3.13143333333333	0.267294615277041	0.612198672313666	1	no	-	--	-	-	-	-
Unigene0001220	16.3333333333333	23.6666666666667	0.2256	1.3989	0.3482	1.0342	0.8330	0.7243	0.657566666666667	0.863833333333333	0.393615820033393	0.614623452002818	1	no	-	--	-	-	-	-
Unigene0001221	88	133.666666666667	1.7228	2.2405	1.6269	4.8694	1.9760	0.9483	1.8634	2.5979	0.479408500310047	0.416488110032206	1	no	-	--	-	-	-	-
Unigene0001222	82	83	6.2962	5.0263	7.5463	4.6188	5.2520	7.9509	6.2896	5.94056666666667	-0.0823677135730282	0.876206545322189	1	no	-	--	-	-	-	-
Unigene0001223	467.333333333333	889.666666666667	4.8340	15.4529	9.5550	37.6588	4.8421	7.6315	9.9473	16.7108	0.748403908969537	0.256868842978898	1	no	dhdh	PREDICTED: trans-1,2-dihydrobenzene-1,2-diol dehydrogenase-like [Sinocyclocheilus grahami]	ko00980//Metabolism of xenobiotics by cytochrome P450//Xenobiotics biodegradation and metabolism//Metabolism;ko00040//Pentose and glucuronate interconversions//Carbohydrate metabolism//Metabolism	-	-	GO:0044699//single-organism process;GO:0008152//metabolic process;GO:0044710//single-organism metabolic process
Unigene0001224	87	51	1.6336	2.5241	4.5488	1.7917	1.5969	1.3812	2.90216666666667	1.58993333333333	-0.868164099507895	0.108771810406118	1	no	-	--	-	-	-	-
Unigene0001225	176	201.333333333333	11.8461	6.4825	10.7077	10.2754	12.2961	9.1055	9.67876666666667	10.559	0.125578082927925	0.783252144434564	1	no	-	--	-	-	-	-
Unigene0001226	989	1099.33333333333	52.9494	38.9474	46.9499	45.3606	53.7009	46.9592	46.2822333333333	48.6735666666667	0.072680012380479	0.84295282883277	1	no	-	--	-	-	-	-
Unigene0001227	23.3333333333333	34	0.5782	0.8992	0.7515	1.0882	1.0114	0.9213	0.742966666666667	1.00696666666667	0.438646536452849	0.456776777233122	1	no	-	--	-	-	-	-
Unigene0001228	27.3333333333333	48.3333333333333	1.3436	2.1763	1.1061	3.3511	3.0365	1.2819	1.542	2.5565	0.729367260771909	0.21718809298719	1	no	-	PREDICTED: golgin subfamily A member 6-like protein 22 [Kryptolebias marmoratus]	-	-	-	-
Unigene0001229	392.666666666667	461.666666666667	1.3663	2.1309	1.7663	1.8871	2.1286	1.7744	1.7545	1.93003333333333	0.1375658165509	0.730165067907465	1	no	NHS	PREDICTED: Nance-Horan syndrome protein-like isoform X2 [Sinocyclocheilus rhinocerous]	-	-	-	-
Unigene0001230	153.666666666667	183.333333333333	2.4227	4.0010	4.0068	3.9472	2.9476	4.5247	3.47683333333333	3.8065	0.130691166999853	0.774634097430776	1	no	pol	PREDICTED: uncharacterized protein LOC108184914 [Danio rerio]	-	-	-	-
Unigene0001231	715.666666666667	639.666666666667	50.7595	38.6363	29.6124	34.7740	32.1169	32.7792	39.6694	33.2233666666667	-0.255828301671081	0.508251979182102	1	no	glrx3	PREDICTED: glutaredoxin 3-like isoform X3 [Sinocyclocheilus grahami]	-	GO:0005622//intracellular;GO:0044444//cytoplasmic part;GO:0005737//cytoplasm;GO:0044464//cell part;GO:0044424//intracellular part;GO:0005623//cell	GO:0016667//oxidoreductase activity, acting on a sulfur group of donors;GO:0016491//oxidoreductase activity;GO:0015036//disulfide oxidoreductase activity;GO:0003824//catalytic activity	GO:0055065//metal ion homeostasis;GO:0098771//inorganic ion homeostasis;GO:0055080//cation homeostasis;GO:0043170//macromolecule metabolic process;GO:0065007//biological regulation;GO:0044763//single-organism cellular process;GO:0044710//single-organism metabolic process;GO:0055076//transition metal ion homeostasis;GO:0019725//cellular homeostasis;GO:0044238//primary metabolic process;GO:0009987/…
Unigene0001232	77.6666666666667	101.666666666667	0.6864	1.4157	1.1274	1.2104	0.5264	2.0465	1.0765	1.2611	0.228334360430574	0.693721797639764	1	no	-	--	-	-	-	-
Unigene0001233	10	10	0.3346	0.1831	0.5165	0.2455	0.1853	0.5218	0.344733333333333	0.317533333333333	-0.118572756119367	0.895481623630943	1	no	-	--	-	-	-	-
Unigene0001234	21	20	0.5170	0.7230	0.6502	0.5531	0.3182	0.7642	0.630066666666667	0.545166666666667	-0.208807133090546	0.784139878540093	1	no	-	PREDICTED: LOW QUALITY PROTEIN: protein NLRC5-like [Sinocyclocheilus anshuiensis]	-	-	-	-
Unigene0001235	12	27.6666666666667	0.6682	0.9507	0.8939	3.7376	0.8883	0.6130	0.8376	1.7463	1.05996807603826	0.164316594463128	1	no	-	--	-	-	-	-
Unigene0001236	3817.66666666667	4763.66666666667	11.1906	16.9347	13.9324	15.9041	19.1331	14.2663	14.0192333333333	16.4345	0.229320109649478	0.506625352232936	1	no	Atp11c	PREDICTED: phospholipid-transporting ATPase IG isoform X1 [Sinocyclocheilus rhinocerous]	-	-	-	-
Unigene0001237	4343	4995.33333333333	13.9924	15.9316	15.6430	16.1069	18.6637	14.5960	15.189	16.4555333333333	0.115545895717481	0.727483547103045	1	no	pol	Septin-8-A [Larimichthys crocea]	-	-	-	-
Unigene0001238	5.33333333333333	1.66666666666667	0.7506	0.7042	0.3310	0.0000	0.3564	0.1967	0.595266666666667	0.184366666666667	-1.69095826825067	0.146984874793346	1	no	-	--	-	-	-	-
Unigene0001239	65	81.6666666666667	1.7586	1.0879	1.0032	1.7353	1.5459	1.2802	1.28323333333333	1.52046666666667	0.244730665465873	0.63017338943241	1	no	-	PREDICTED: RNA-directed DNA polymerase from mobile element jockey-like [Oryzias latipes]	-	-	-	-
Unigene0001240	0	3.66666666666667	0.0000	0.0000	0.0000	0.3011	0.0000	0.1722	0.001	0.157766666666667	7.30164861112985	0.0302158568442069	1	no	-	PREDICTED: uncharacterized protein C2orf61 homolog [Sinocyclocheilus rhinocerous]	-	-	-	-
Unigene0001241	8.66666666666667	12.6666666666667	0.1206	0.5281	0.4552	0.7006	0.0000	0.7009	0.367966666666667	0.467166666666667	0.344362257071742	0.735880633410479	1	no	pol	PREDICTED: protein MAATS1 isoform X1 [Danio rerio]	-	-	-	-
Unigene0001242	10	7.66666666666667	0.5734	0.0000	1.0192	0.1434	0.3465	0.6695	0.530866666666667	0.386466666666667	-0.458005572007454	0.698366975054175	1	no	-	--	-	-	-	-
Unigene0001243	192	178.666666666667	5.1914	3.8850	4.1551	4.1094	4.3995	3.1548	4.4105	3.8879	-0.181951105264523	0.673551494948995	1	no	si:ch211-67n3.3	BLOC-1-related complex subunit 7 [Danio rerio]	-	-	-	-
Unigene0001244	13.3333333333333	3	0.5954	1.1849	0.5013	0.2482	0.2399	0.0000	0.760533333333333	0.1627	-2.2247972300502	0.0157639384247748	0.838256719343299	no	Tmem150c	PREDICTED: transmembrane protein 150C-like [Sinocyclocheilus rhinocerous]	-	-	-	-
Unigene0001245	221.333333333333	232	12.1911	10.6961	11.8195	14.5510	9.7667	9.5206	11.5689	11.2794333333333	-0.0365571058055618	0.935718531278095	1	no	-	--	-	-	-	-
Unigene0001246	2.33333333333333	5	0.0825	0.0903	0.4244	0.3025	0.0914	0.7567	0.199066666666667	0.383533333333333	0.946100304749694	0.44550140575107	1	no	-	--	-	-	-	-
Unigene0001247	29.6666666666667	46	1.3628	2.2017	2.4708	3.3918	3.1633	2.2028	2.01176666666667	2.9193	0.537159491209928	0.330376044854827	1	no	-	--	-	-	-	-
Unigene0001248	26.6666666666667	27.6666666666667	1.0291	0.9275	0.5606	0.6383	0.9053	0.9163	0.839066666666667	0.819966666666667	-0.0332201797899875	0.975205441467824	1	no	-	--	-	-	-	-
Unigene0001249	35.3333333333333	122.666666666667	0.9791	0.5125	3.1539	13.5055	0.0943	0.7810	1.5485	4.7936	1.63023814589673	0.149226840627663	1	no	-	--	-	-	-	-
Unigene0001250	604.333333333333	1060.33333333333	1.4754	2.3669	1.8060	4.6289	2.0729	2.3333	1.88276666666667	3.0117	0.677723851872897	0.114317160996393	1	no	AKAP13	PREDICTED: A-kinase anchor protein 13-like isoform X6 [Sinocyclocheilus anshuiensis]	-	-	-	-
Unigene0001251	150.666666666667	160.333333333333	6.4151	5.7315	8.3080	5.4423	5.6082	9.1683	6.8182	6.7396	-0.0167279500575782	0.978248621548047	1	no	-	--	-	-	-	-
Unigene0001252	17.3333333333333	11	0.7828	0.8568	0.8530	0.7178	0.7652	0.0422	0.830866666666667	0.5084	-0.708652948731698	0.38573004288119	1	no	-	--	-	-	-	-
Unigene0001253	59.3333333333333	65.3333333333333	0.9150	2.3088	1.5431	1.7712	2.0273	1.1192	1.58896666666667	1.63923333333333	0.0449323663885174	0.943475916584462	1	no	-	Retrotransposable element Tf2 protein type 3 [Larimichthys crocea]	-	-	-	-
Unigene0001254	19	18.3333333333333	0.6834	0.8602	0.4923	0.5013	0.5300	0.7837	0.678633333333333	0.605	-0.165697152167449	0.830294230751181	1	no	-	--	-	-	-	-
Unigene0001255	46.3333333333333	62.3333333333333	2.0842	2.2810	2.1914	3.9054	2.0078	2.2030	2.18553333333333	2.7054	0.307856533811035	0.567073414471647	1	no	-	--	-	-	-	-
Unigene0001256	8.66666666666667	24.6666666666667	0.3642	1.0629	0.2498	1.7810	1.2104	1.3364	0.558966666666667	1.4426	1.36783717163605	0.0509235125592938	1	no	-	PREDICTED: zinc finger BED domain-containing protein 4 isoform X3 [Danio rerio]	-	-	-	-
Unigene0001257	19	21.6666666666667	0.9027	1.1527	0.9290	1.2877	0.2222	1.5183	0.9948	1.0094	0.0210195790815201	0.999999999999991	1	no	-	--	-	-	-	-
Unigene0001258	2.33333333333333	0.333333333333333	0.0302	0.0330	0.1553	0.0277	0.0000	0.0000	0.0728333333333333	0.00923333333333333	-2.97967539833877	0.173851616089901	1	no	-	--	-	-	-	-
Unigene0001259	47	39.3333333333333	0.9373	1.1213	1.1440	0.8795	1.3041	0.4000	1.06753333333333	0.8612	-0.309860893550126	0.58682146385396	1	no	-	--	-	-	-	-
Unigene0001260	2014	1818.33333333333	10.7257	7.9985	11.4546	7.2193	8.4493	9.9374	10.0596	8.53533333333333	-0.23705353884735	0.506936262680923	1	no	MCF2L	PREDICTED: guanine nucleotide exchange factor DBS-like [Sinocyclocheilus grahami]	-	-	-	-
Unigene0001261	295.666666666667	224.666666666667	2.8391	0.9753	1.3755	1.3200	1.0252	1.3626	1.72996666666667	1.23593333333333	-0.485143314124758	0.314566427886083	1	no	CDH1	PREDICTED: B-cadherin-like [Sinocyclocheilus grahami]	ko04514//Cell adhesion molecules (CAMs)//Signaling molecules and interaction//Environmental Information Processing;ko04520//Adherens junction//Cellular commiunity//Cellular Processes	-	-	-
Unigene0001262	0	3	0.0000	0.0000	0.0000	0.1817	0.2195	0.1817	0.001	0.1943	7.60214209069798	0.0172591211620576	0.879090764285493	no	-	--	-	-	-	-
Unigene0001263	12	18.3333333333333	0.4492	1.2292	0.4623	1.1328	1.1820	0.7213	0.713566666666667	1.01203333333333	0.504136680515704	0.478241726115094	1	no	-	--	-	-	-	-
Unigene0001264	28	37	2.3468	1.1008	1.3800	2.6643	1.9809	1.3841	1.6092	2.00976666666667	0.320684371570128	0.602760022939951	1	no	-	--	-	-	-	-
Unigene0001265	17.6666666666667	10.6666666666667	0.5543	0.5308	2.7094	0.4447	0.6141	1.0806	1.26483333333333	0.713133333333333	-0.82670354874563	0.335875516291138	1	no	-	--	-	-	-	-
Unigene0001266	119	204.666666666667	3.0337	4.0221	2.1574	6.0611	5.4102	3.3488	3.07106666666667	4.94003333333333	0.685780945906593	0.148593937928328	1	no	-	--	-	-	-	-
Unigene0001267	1	1	0.0000	0.1773	0.0834	0.0743	0.0897	0.0743	0.0869	0.0794333333333333	-0.129611631345286	1	1	no	-	--	-	-	-	-
Unigene0001268	4310.33333333333	4800.66666666667	54.0923	201.2153	114.8611	267.0436	40.6098	56.3713	123.389566666667	121.341566666667	-0.0241465675176238	0.969373837535557	1	no	APOC2	apolipoprotein C-II [Hemibarbus mylodon]	-	-	-	-
Unigene0001269	403.333333333333	458.333333333333	2.0784	2.2568	2.5317	2.1559	2.2602	2.8526	2.28896666666667	2.4229	0.0820384082364645	0.835036117341153	1	no	ATF2	PREDICTED: cyclic AMP-dependent transcription factor ATF-2-like [Sinocyclocheilus anshuiensis]	ko04010//MAPK signaling pathway//Signal transduction//Environmental Information Processing;ko04261//Adrenergic signaling in cardiomyocytes//Circulatory system//Organismal Systems	-	-	-
Unigene0001270	55.6666666666667	60.6666666666667	0.9948	0.9502	1.1912	1.5258	0.9017	0.7467	1.0454	1.05806666666667	0.0173754672374212	0.987118403538047	1	no	-	--	-	-	-	-
Unigene0001271	12.6666666666667	27.3333333333333	0.4407	0.4824	0.6597	0.9185	0.8878	1.3601	0.5276	1.05546666666667	1.00036454707482	0.0992011435676252	1	no	-	--	-	-	-	-
Unigene0001272	72.3333333333333	55	1.3689	0.5805	1.8665	0.3452	0.4929	1.8367	1.27196666666667	0.8916	-0.512592341942775	0.457433134398953	1	no	bsx	brain-specific homeobox protein homolog [Danio rerio]	-	GO:0043226//organelle;GO:0043229//intracellular organelle;GO:0005623//cell;GO:0005622//intracellular;GO:0043231//intracellular membrane-bounded organelle;GO:0044424//intracellular part;GO:0043227//membrane-bounded organelle;GO:0044464//cell part	GO:0003677//DNA binding;GO:0001071//nucleic acid binding transcription factor activity;GO:0005488//binding;GO:1901363//heterocyclic compound binding;GO:0097159//organic cyclic compound binding;GO:0003676//nucleic acid binding	GO:1901576//organic substance biosynthetic process;GO:0009987//cellular process;GO:0046483//heterocycle metabolic process;GO:0006807//nitrogen compound metabolic process;GO:0009058//biosynthetic process;GO:0090304//nucleic acid metabolic process;GO:1901360//organic cyclic compound metabolic process;GO:0006139//nucleobase-containing compound metabolic process;GO:0044238//primary metabolic process;…
Unigene0001273	23.3333333333333	20.6666666666667	1.2898	1.1764	1.4379	1.1827	1.7266	0.4437	1.30136666666667	1.11766666666667	-0.219537523574534	0.758776678293589	1	no	-	--	-	-	-	-
Unigene0001274	12	40.6666666666667	0.5229	0.3434	0.4304	1.7900	0.8496	1.4071	0.432233333333333	1.3489	1.6419011582353	0.00800770013192754	0.659336004344017	no	-	--	-	-	-	-
Unigene0001275	234.666666666667	265	16.4475	7.6485	27.0225	14.9524	18.2996	21.3711	17.0395	18.2077	0.0956656899805801	0.847505890208138	1	no	-	--	-	-	-	-
Unigene0001276	232.333333333333	314.666666666667	18.8104	14.5496	31.8273	22.8047	26.4497	33.6015	21.7291	27.6186333333333	0.346013511149945	0.443096391811389	1	no	-	--	-	-	-	-
Unigene0001277	37039.3333333333	39287	164.1201	77.8164	288.6295	165.2483	174.2425	192.2045	176.855333333333	177.231766666667	0.00306748654679879	0.994294796589989	1	no	pim2	PREDICTED: RNA-directed DNA polymerase from mobile element jockey-like [Sinocyclocheilus anshuiensis]	-	-	-	-
Unigene0001278	74	70.3333333333333	3.9162	2.4840	3.8010	3.5094	3.1060	2.5313	3.4004	3.0489	-0.157415632626867	0.762898004546468	1	no	-	--	-	-	-	-
Unigene0001279	19.6666666666667	20.6666666666667	2.1552	0.9760	1.3766	1.0904	2.2230	1.2954	1.5026	1.53626666666667	0.0319676548306889	1	1	no	-	--	-	-	-	-
Unigene0001280	30	23	0.7537	2.6811	1.0665	1.2959	0.8350	0.9940	1.50043333333333	1.04163333333333	-0.526531697025184	0.425429293441768	1	no	-	--	-	-	-	-
Unigene0001281	9.66666666666667	2.33333333333333	0.7648	0.7440	1.0493	0.1558	0.2824	0.1559	0.8527	0.198033333333333	-2.10629496880447	0.0168243678573138	0.868407517267742	no	-	--	-	-	-	-
Unigene0001282	2276.33333333333	2654	12.0505	12.9656	13.1129	14.7054	13.0470	13.6740	12.7096666666667	13.8088	0.119661759620222	0.72187464486454	1	no	-	--	-	-	-	-
Unigene0001283	89.6666666666667	76	6.2962	1.5403	12.5772	2.8528	3.6928	9.5818	6.80456666666667	5.3758	-0.340023824478296	0.634207867270516	1	no	-	--	-	-	-	-
Unigene0001284	23.3333333333333	25.3333333333333	1.9320	1.0937	1.7825	1.5273	2.1404	1.3447	1.60273333333333	1.6708	0.0600046422606293	0.94585449870621	1	no	-	--	-	-	-	-
Unigene0001285	762	825.666666666667	4.9624	5.6105	7.9731	5.6451	6.2410	6.9149	6.182	6.267	0.0197013389300411	0.960097081586475	1	no	-	PREDICTED: uncharacterized protein LOC107758869 [Sinocyclocheilus rhinocerous]	-	-	-	-
Unigene0001286	3.33333333333333	3	0.1044	0.1143	0.1433	0.0957	0.0771	0.1277	0.120666666666667	0.100166666666667	-0.268624706372019	1	1	no	-	--	-	-	-	-
Unigene0001287	0	0	0.0000	0.0000	0.0000	0.0000	0.0000	0.0000	0.001	0.001	0	notest	notest	notest	-	--	-	-	-	-
Unigene0001288	138.666666666667	119.666666666667	9.1500	7.3865	11.4193	6.7242	8.4834	7.6205	9.3186	7.60936666666667	-0.292336842625814	0.525414266628248	1	no	-	--	-	-	-	-
Unigene0001289	14.6666666666667	14.3333333333333	0.7855	1.1463	1.0778	1.2005	0.5802	0.9008	1.0032	0.893833333333333	-0.166531500612233	0.833829375252192	1	no	-	--	-	-	-	-
Unigene0001290	117	120	2.4762	2.1385	2.4287	1.6852	1.6288	3.3544	2.3478	2.2228	-0.0789313706714616	0.878862898891576	1	no	-	PREDICTED: alpha-tubulin N-acetyltransferase 1 isoform X3 [Sinocyclocheilus rhinocerous]	-	-	-	-
Unigene0001291	7.33333333333333	14.6666666666667	0.1495	0.1636	0.0308	0.3702	0.2319	0.0412	0.114633333333333	0.214433333333333	0.90350257281985	0.32663663514483	1	no	-	PREDICTED: cell surface glycoprotein 1-like [Sinocyclocheilus anshuiensis]	-	-	-	-
Unigene0001292	299.333333333333	601.333333333333	2.5600	4.9425	2.1813	9.1459	5.5022	3.2411	3.22793333333333	5.96306666666667	0.885443683210116	0.0704009561736644	1	no	CD97	PREDICTED: CD97 antigen-like [Sinocyclocheilus grahami]	-	GO:0016020//membrane;GO:0044425//membrane part;GO:0031224//intrinsic component of membrane	GO:0004872//receptor activity;GO:0043167//ion binding;GO:0004871//signal transducer activity;GO:0043169//cation binding;GO:0046872//metal ion binding;GO:0005488//binding;GO:0060089//molecular transducer activity;GO:0038023//signaling receptor activity	GO:0065007//biological regulation;GO:0050794//regulation of cellular process;GO:0050789//regulation of biological process;GO:0023052//signaling;GO:0007186//G-protein coupled receptor signaling pathway;GO:0044699//single-organism process;GO:0044700//single organism signaling;GO:0044763//single-organism cellular process;GO:0007165//signal transduction;GO:0050896//response to stimulus;GO:0007154//ce…
Unigene0001293	47.3333333333333	57	0.7765	5.2052	1.3983	1.7355	1.1828	4.8975	2.46	2.60526666666667	0.0827727340938264	0.919874894828627	1	no	-	PREDICTED: aryl hydrocarbon receptor repressor-like [Sinocyclocheilus grahami]	-	GO:0005623//cell;GO:0044424//intracellular part;GO:0043229//intracellular organelle;GO:0044464//cell part;GO:0043231//intracellular membrane-bounded organelle;GO:0043227//membrane-bounded organelle;GO:0043226//organelle;GO:0005622//intracellular	GO:0097159//organic cyclic compound binding;GO:1901363//heterocyclic compound binding;GO:0001076//transcription factor activity, RNA polymerase II transcription factor binding;GO:0005488//binding;GO:0000988//transcription factor activity, protein binding;GO:0000989//transcription factor activity, transcription factor binding;GO:0003676//nucleic acid binding	GO:0034654//nucleobase-containing compound biosynthetic process;GO:1901360//organic cyclic compound metabolic process;GO:0008152//metabolic process;GO:0046483//heterocycle metabolic process;GO:0044271//cellular nitrogen compound biosynthetic process;GO:0009987//cellular process;GO:0006139//nucleobase-containing compound metabolic process;GO:0019438//aromatic compound biosynthetic process;GO:00508…
Unigene0001294	55	73.3333333333333	1.8487	1.2927	1.2419	1.3420	2.0481	2.1436	1.4611	1.84456666666667	0.336227010267745	0.506681219513897	1	no	-	PREDICTED: zinc finger BED domain-containing protein 1-like [Cyprinus carpio]	-	-	-	-
Unigene0001295	5007	4364.33333333333	21.6836	20.2909	17.5137	13.8379	19.5049	15.7781	19.8294	16.3736333333333	-0.276266531524633	0.413546987047215	1	no	SF1	PREDICTED: splicing factor 1 isoform X1 [Danio rerio]	-	-	GO:1901363//heterocyclic compound binding;GO:0043167//ion binding;GO:0003676//nucleic acid binding;GO:0046914//transition metal ion binding;GO:0097159//organic cyclic compound binding;GO:0005488//binding;GO:0043169//cation binding;GO:0046872//metal ion binding	GO:0007275//multicellular organism development;GO:0048731//system development;GO:0043010//camera-type eye development;GO:0044707//single-multicellular organism process;GO:0048856//anatomical structure development;GO:0007423//sensory organ development;GO:0032502//developmental process;GO:0001654//eye development;GO:0032501//multicellular organismal process;GO:0044699//single-organism process;GO:00…
Unigene0001296	22906.6666666667	22397.3333333333	82.5728	94.2975	86.7340	74.2283	79.7476	86.6579	87.8681	80.2112666666667	-0.131534603104913	0.682768913269825	1	no	TDRD6	PREDICTED: tudor domain-containing protein 6-like isoform X3 [Sinocyclocheilus rhinocerous]	-	-	-	-
Unigene0001297	1939.66666666667	2155.66666666667	15.9421	13.9857	14.2954	11.4491	17.1424	17.7967	14.7410666666667	15.4627333333333	0.0689544437731971	0.846714325027363	1	no	phactr1	PREDICTED: phosphatase and actin regulator 1-like isoform X2 [Sinocyclocheilus rhinocerous]	-	-	-	-
Unigene0001298	16	14.6666666666667	0.6938	1.7949	0.7140	0.6362	1.3976	0.7523	1.06756666666667	0.9287	-0.201041625053202	0.821297594949879	1	no	-	--	-	-	-	-
Unigene0001299	4.33333333333333	15.6666666666667	0.4186	0.3665	0.3446	1.0746	0.9274	1.7664	0.376566666666667	1.25613333333333	1.73801240375592	0.0184335602170566	0.893554226852557	no	Tf2-6	PREDICTED: RNA-directed DNA polymerase homolog, partial [Danio rerio]	-	-	-	-
Unigene0001300	6	5.66666666666667	0.3676	0.2012	0.2837	0.2107	0.4073	0.1686	0.284166666666667	0.2622	-0.116069647855988	0.999999999999993	1	no	Plekhs1	PREDICTED: pleckstrin homology domain-containing family S member 1-like [Sinocyclocheilus anshuiensis]	-	-	-	-
Unigene0001301	81	89.3333333333333	1.4606	2.4867	6.3046	4.5390	3.2364	2.7545	3.4173	3.50996666666667	0.0386004241452229	0.9611305770835	1	no	-	PREDICTED: beta-taxilin isoform X1 [Salmo salar]	-	-	-	-
Unigene0001302	114	141	2.6139	1.8860	2.3511	1.7400	3.5179	2.8599	2.28366666666667	2.70593333333333	0.24477421136647	0.610145080964691	1	no	-	PREDICTED: proteoglycan 4-like [Cyprinus carpio]	-	-	-	-
Unigene0001303	6.33333333333333	10.6666666666667	0.9007	0.9858	0.1030	1.1930	1.1087	0.8263	0.663166666666667	1.04266666666667	0.652834613613618	0.474237722967387	1	no	-	--	-	-	-	-
Unigene0001304	132	208.666666666667	1.0201	2.4121	1.8144	4.5963	1.9673	1.0052	1.74886666666667	2.52293333333333	0.528681782059543	0.361609604465024	1	no	-	--	-	-	-	-
Unigene0001305	1269.33333333333	1497	6.2537	8.0269	5.0882	7.8096	7.7315	5.8355	6.45626666666667	7.12553333333333	0.142297833072656	0.700399855193315	1	no	Mdc1	PREDICTED: mediator of DNA damage checkpoint protein 1-like isoform X1 [Sinocyclocheilus rhinocerous]	-	-	-	-
Unigene0001306	7706	6568	127.1085	105.5618	99.8101	69.0914	110.3100	90.1784	110.8268	89.8599333333333	-0.302556897664302	0.376816848119732	1	no	Thoc3	THO complex subunit 3 [Danio rerio]	ko03013//RNA transport//Translation//Genetic Information Processing;ko03040//Spliceosome//Transcription//Genetic Information Processing	-	-	-
Unigene0001307	12.6666666666667	4	0.9988	0.8944	1.6819	0.0833	0.1006	0.8330	1.1917	0.338966666666667	-1.8138057821315	0.0534196338926815	1	no	-	--	-	-	-	-
Unigene0001308	26.3333333333333	47.3333333333333	0.7979	1.1643	1.6878	1.2601	3.1429	1.9113	1.21666666666667	2.10476666666667	0.790726342466046	0.190282633864021	1	no	-	--	-	-	-	-
Unigene0001309	30.6666666666667	67.3333333333333	0.2450	0.3575	1.3446	1.3104	1.3797	1.3298	0.649033333333333	1.33996666666667	1.04583263250756	0.111579266219479	1	no	POL	PREDICTED: gypsy retrotransposon integrase-like protein 1 [Danio rerio]	-	-	-	-
Unigene0001310	105	89.3333333333333	5.9086	4.1674	11.2822	4.9966	3.4911	8.2514	7.1194	5.5797	-0.351568104924214	0.525679908252799	1	no	-	--	-	-	-	-
Unigene0001311	3228.33333333333	3683	10.2249	7.4343	15.0040	6.5488	11.1433	17.2914	10.8877333333333	11.6611666666667	0.0990084959778226	0.814919574106686	1	no	ptpru	receptor protein tyrosine phosphatase psi [Danio rerio]	-	GO:0016020//membrane;GO:0031224//intrinsic component of membrane;GO:0044425//membrane part	GO:0016788//hydrolase activity, acting on ester bonds;GO:0016791//phosphatase activity;GO:0042578//phosphoric ester hydrolase activity;GO:0004725//protein tyrosine phosphatase activity;GO:0016787//hydrolase activity;GO:0003824//catalytic activity;GO:0004721//phosphoprotein phosphatase activity	GO:0009888//tissue development;GO:0007389//pattern specification process;GO:0006793//phosphorus metabolic process;GO:0051716//cellular response to stimulus;GO:0044707//single-multicellular organism process;GO:0035282//segmentation;GO:0007166//cell surface receptor signaling pathway;GO:0048869//cellular developmental process;GO:0008152//metabolic process;GO:0048856//anatomical structure developmen…
Unigene0001312	82.6666666666667	49.3333333333333	5.5663	5.7459	5.0120	3.1321	2.5227	3.3657	5.4414	3.00683333333333	-0.85573298296859	0.0784103480779846	1	no	-	--	-	-	-	-
Unigene0001313	1544.66666666667	1901	18.8988	18.4068	14.9205	22.5763	16.9754	20.0523	17.4087	19.868	0.190638178570131	0.58869548262895	1	no	R3hcc1l	PREDICTED: coiled-coil domain-containing protein R3HCC1L-like [Sinocyclocheilus rhinocerous]	-	-	-	-
Unigene0001314	42.6666666666667	61.6666666666667	0.6069	0.7664	0.7046	0.9704	0.9137	0.9137	0.692633333333333	0.9326	0.429166610035384	0.393716910510608	1	no	-	PREDICTED: LOW QUALITY PROTEIN: oxygen-regulated protein 1-like [Sinocyclocheilus grahami]	-	-	-	-
Unigene0001315	25	23	0.3928	2.2209	2.5598	1.2605	2.6107	0.7207	1.7245	1.53063333333333	-0.172049405423353	0.831434947332129	1	no	-	--	-	-	-	-
Unigene0001316	25.6666666666667	54	1.2566	1.8154	0.9828	2.7654	2.1717	2.9051	1.3516	2.61406666666667	0.951627679108493	0.0815421162702386	1	no	-	--	-	-	-	-
Unigene0001317	64	56	2.2295	1.3116	1.9788	2.1977	1.6364	0.7415	1.83996666666667	1.5252	-0.270681194089159	0.631214289685946	1	no	ZNF568	PREDICTED: gastrula zinc finger protein XlCGF57.1-like [Sinocyclocheilus grahami]	-	-	-	-
Unigene0001318	300	252.333333333333	9.6980	10.6443	5.6012	7.6767	7.3463	5.4245	8.64783333333333	6.81583333333333	-0.343448660818681	0.433588970678534	1	no	tmem14c	PREDICTED: transmembrane protein 14C-like [Sinocyclocheilus rhinocerous]	-	-	-	-
Unigene0001319	176.333333333333	249.666666666667	4.1437	5.0161	2.4120	6.7357	4.5442	3.8783	3.85726666666667	5.05273333333333	0.38948515316778	0.401283449206586	1	no	Parm1	PREDICTED: cell wall integrity and stress response component 3-like [Cyprinus carpio]	-	-	-	-
Unigene0001320	49	44	0.7089	1.1638	1.3303	1.3192	0.9240	0.4400	1.06766666666667	0.8944	-0.255469204097704	0.678517683848566	1	no	-	--	-	-	-	-
Unigene0001321	8	9.66666666666667	0.7290	0.8865	0.4168	0.3714	1.1666	0.8174	0.677433333333333	0.785133333333333	0.212858700070016	0.8289545079766	1	no	-	--	-	-	-	-
Unigene0001322	168	165.666666666667	4.9141	6.8652	3.4803	5.5399	4.6435	3.7923	5.08653333333333	4.65856666666667	-0.1267966002398	0.787387991716419	1	no	-	--	-	-	-	-
Unigene0001323	2273.66666666667	1969.66666666667	24.0905	21.8648	17.0023	16.7714	20.7448	14.1963	20.9858666666667	17.2375	-0.28386749260841	0.425402592542036	1	no	mtfr1	PREDICTED: mitochondrial fission regulator 1-like isoform X2 [Sinocyclocheilus grahami]	-	GO:0043231//intracellular membrane-bounded organelle;GO:0005623//cell;GO:0005622//intracellular;GO:0043229//intracellular organelle;GO:0043226//organelle;GO:0044424//intracellular part;GO:0043227//membrane-bounded organelle;GO:0044464//cell part	-	GO:0016043//cellular component organization;GO:0045333//cellular respiration;GO:0008152//metabolic process;GO:0055114//oxidation-reduction process;GO:0071840//cellular component organization or biogenesis;GO:0009987//cellular process;GO:0015980//energy derivation by oxidation of organic compounds;GO:0044710//single-organism metabolic process;GO:0044237//cellular metabolic process;GO:0006091//gene…
Unigene0001324	71.6666666666667	77.3333333333333	0.7835	1.9015	1.1744	1.4838	1.0756	1.2502	1.28646666666667	1.26986666666667	-0.0187370512265019	0.979985351816529	1	no	-	--	-	-	-	-
Unigene0001325	6.33333333333333	5.33333333333333	0.4249	0.3321	0.4372	0.2783	0.4707	0.2227	0.398066666666667	0.3239	-0.297461599859553	0.753850522039486	1	no	-	--	-	-	-	-
Unigene0001326	963.333333333333	1203.66666666667	6.5165	7.8897	5.6715	8.1300	7.3447	7.8348	6.69256666666667	7.76983333333333	0.215324047405268	0.553448809170588	1	no	spty2d1	PREDICTED: protein SPT2 homolog isoform X4 [Cyprinus carpio]	-	-	-	-
Unigene0001327	2.33333333333333	6	0.2603	0.0712	0.1339	0.8355	0.0000	0.2388	0.155133333333333	0.3581	1.20685380863634	0.345401644645448	1	no	-	PREDICTED: sentrin-specific protease 5 isoform X3 [Austrofundulus limnaeus]	-	-	-	-
Unigene0001328	523.333333333333	523.333333333333	4.5751	2.9148	4.5702	3.4107	3.0658	4.7637	4.02003333333333	3.74673333333333	-0.101574163773129	0.803465665355799	1	no	-	PREDICTED: MORC family CW-type zinc finger protein 3-like [Sinocyclocheilus rhinocerous]	-	-	-	-
Unigene0001329	505.333333333333	711	3.4068	3.9587	2.4178	4.2919	5.3154	3.4034	3.2611	4.3369	0.411305496715834	0.302567153521092	1	no	PCSK5	PREDICTED: proprotein convertase subtilisin/kexin type 5-like [Danio rerio]	-	-	-	-
Unigene0001330	9.66666666666667	8.66666666666667	1.4412	0.4929	0.7415	0.6608	0.8981	0.7437	0.891866666666667	0.767533333333333	-0.216598637656445	0.771077857629211	1	no	-	--	-	-	-	-
Unigene0001331	541.666666666667	803.666666666667	4.9134	6.4883	4.7048	10.0547	6.3260	5.6825	5.36883333333333	7.3544	0.453999026236406	0.257703951218096	1	no	NR1H3	PREDICTED: oxysterols receptor LXR-alpha-like [Sinocyclocheilus anshuiensis]	ko03320//PPAR signaling pathway//Endocrine system//Organismal Systems	GO:0044464//cell part;GO:0044424//intracellular part;GO:0043229//intracellular organelle;GO:0043226//organelle;GO:0005622//intracellular;GO:0043231//intracellular membrane-bounded organelle;GO:0043227//membrane-bounded organelle;GO:0005623//cell	GO:0003700//transcription factor activity, sequence-specific DNA binding;GO:0097159//organic cyclic compound binding;GO:0003676//nucleic acid binding;GO:0005488//binding;GO:0003677//DNA binding;GO:0043169//cation binding;GO:0001071//nucleic acid binding transcription factor activity;GO:1901363//heterocyclic compound binding;GO:0046914//transition metal ion binding;GO:0004871//signal transducer ac…	GO:0044271//cellular nitrogen compound biosynthetic process;GO:0051716//cellular response to stimulus;GO:0010467//gene expression;GO:0032774//RNA biosynthetic process;GO:0044238//primary metabolic process;GO:0050896//response to stimulus;GO:0044260//cellular macromolecule metabolic process;GO:0034654//nucleobase-containing compound biosynthetic process;GO:0009058//biosynthetic process;GO:0043170/…
Unigene0001332	6243.33333333333	7918.66666666667	11.9960	16.9610	12.1159	15.9348	18.7084	14.2559	13.6909666666667	16.2997	0.251621098184765	0.457821022314998	1	no	BPTF	PREDICTED: nucleosome-remodeling factor subunit BPTF isoform X4 [Danio rerio]	-	-	-	-
Unigene0001333	36.3333333333333	25.3333333333333	1.0875	0.6651	1.8433	1.0559	0.6378	0.6456	1.19863333333333	0.779766666666667	-0.62027601105077	0.3149280428023	1	no	-	--	-	-	-	-
Unigene0001334	73.6666666666667	56.6666666666667	0.3371	1.4758	3.3764	1.8341	0.4730	1.2783	1.72976666666667	1.19513333333333	-0.533405862208012	0.46954217227494	1	no	IGHV3-23	immunoglobulin HY heavy chain [Ctenopharyngodon idella]	-	-	-	-
Unigene0001335	222	1321.66666666667	5.0233	26.7938	9.2096	184.1431	13.0491	14.9908	13.6755666666667	70.7276666666667	2.37067405262656	0.00676232561315653	0.616005974114452	no	IGHV3-23	immunoglobulin HY heavy chain [Ctenopharyngodon idella]	-	-	-	-
Unigene0001336	13.3333333333333	26.6666666666667	0.3652	1.5320	0.6889	0.9487	2.3598	1.5634	0.862033333333333	1.62396666666667	0.913706458232299	0.197683981087942	1	no	-	--	-	-	-	-
[truncated: 72,113 more rows]
