# Supplementary material for: Comparative Analysis of miRNA-mRNA Regulation in the Testes of Gobiocypris rarus following 17α-Methyltestosterone Exposure
Source: Int J Mol Sci. 2023 Feb 20;24(4):4239. doi: 10.3390/ijms24044239 (PMC9968023; doi:10.3390/ijms24044239)
Supplement: Supplementary file 1 [file ijms-24-04239-s001.zip › Table S4.xls]

## Sheet: Sheet1
Table S4 The mRNA profile in the comparison by STEM analysis
id	Profile	Con-M	MT25-M	MT50-M	MT100-M	-	-	-	-	-	-
UNIGENE0000059	9	0	0.4	-0.5	-0.8	cfap97	PREDICTED: cilia- and flagella-associated protein 97-like [Sinocyclocheilus anshuiensis]	-	-	-	-
UNIGENE0000381	9	0	0.07	-0.65	-0.97	DYNLRB2	PREDICTED: dynein light chain roadblock-type 2 [Astyanax mexicanus]	-	-	-	-
UNIGENE0000541	9	0	0.11	-0.63	-0.91	ZNF271	PREDICTED: zinc finger protein 239-like isoform X1 [Sinocyclocheilus grahami]	-	-	-	-
UNIGENE0000798	9	0	0.45	-0.66	-1.19	-	PREDICTED: uncharacterized protein LOC109201215 isoform X3 [Oreochromis niloticus]	-	-	-	-
UNIGENE0000986	9	0	0.02	-1.52	-2.12	-	--	-	-	-	-
UNIGENE0001028	9	0	0.24	-0.82	-1.52	-	PREDICTED: uncharacterized protein LOC109083040 [Cyprinus carpio]	-	-	-	-
UNIGENE0001112	9	0	0.15	-0.61	-1.28	-	--	-	-	-	-
UNIGENE0001140	9	0	0.29	-0.95	-1.45	-	--	-	-	-	-
UNIGENE0001242	9	0	0.28	-0.85	-1.31	-	--	-	-	-	-
UNIGENE0001265	9	0	0.1	-0.81	-1.64	-	--	-	-	-	-
UNIGENE0001307	9	0	0.3	-0.87	-2.68	-	--	-	-	-	-
UNIGENE0001310	9	0	-0.04	-0.76	-1.12	-	--	-	-	-	-
UNIGENE0001458	9	0	0.09	-0.58	-1.63	-	--	-	-	-	-
UNIGENE0001545	9	0	-0.28	-1.06	-1.77	-	--	-	-	-	-
UNIGENE0001606	9	0	0.05	-0.71	-1.41	-	--	-	-	-	-
UNIGENE0001651	9	0	0.14	-0.83	-1.73	-	--	-	-	-	-
UNIGENE0001785	9	0	0.24	-0.41	-0.97	-	--	-	-	-	-
UNIGENE0001867	9	0	1.29	-1.61	-3.12	-	--	-	-	-	-
UNIGENE0001991	9	0	0.44	-0.47	-1.12	-	--	-	-	-	-
UNIGENE0002307	9	0	-0.38	-0.63	-1.62	tc1a	transposase, partial [Siniperca chuatsi]	-	-	-	-
UNIGENE0002677	9	0	0.22	-0.3	-0.97	ZNF22	PREDICTED: gastrula zinc finger protein XlCGF7.1-like [Sinocyclocheilus rhinocerous]	-	-	-	-
UNIGENE0002726	9	0	-0.13	-0.64	-1.19	-	--	-	-	-	-
UNIGENE0002931	9	0	-0.04	-1.06	-1.62	-	--	-	-	-	-
UNIGENE0002959	9	0	0.6	-0.96	-1.65	-	--	-	-	-	-
UNIGENE0003331	9	0	0.23	-0.26	-0.8	-	--	-	-	-	-
UNIGENE0003531	9	0	0.15	-1.32	-2.24	-	--	-	-	-	-
UNIGENE0003574	9	0	0.32	-0.39	-1.12	armt1	PREDICTED: protein-glutamate O-methyltransferase-like [Sinocyclocheilus grahami]	-	-	-	-
UNIGENE0003610	9	0	0.23	-0.48	-0.85	-	PREDICTED: putative golgin subfamily A member 6-like protein 19 [Sinocyclocheilus grahami]	-	-	-	-
UNIGENE0003714	9	0	0.61	-0.35	-2.24	-	--	-	-	-	-
UNIGENE0003841	9	0	-0.01	-0.96	-2.1	-	--	-	-	-	-
UNIGENE0003867	9	0	-0.17	-1.27	-1.73	-	--	-	-	-	-
UNIGENE0004116	9	0	0.35	-0.76	-1.18	-	--	-	-	-	-
UNIGENE0004148	9	0	0.31	-0.42	-0.8	WDR66	PREDICTED: WD repeat-containing protein 66-like [Sinocyclocheilus anshuiensis]	-	-	-	-
UNIGENE0004485	9	0	-0.4	-1.12	-3.08	-	--	-	-	-	-
UNIGENE0004550	9	0	0.55	-0.84	-1.56	-	toll-like receptor 4.3 [Ctenopharyngodon idella]	-	-	-	-
UNIGENE0004678	9	0	0.28	-2.41	-3.58	-	--	-	-	-	-
UNIGENE0004998	9	0	0.33	-0.61	-1.15	-	--	-	-	-	-
UNIGENE0005453	9	0	0.23	-0.72	-1.11	-	--	-	-	-	-
UNIGENE0005774	9	0	0.27	-0.69	-1.38	-	--	-	-	-	-
UNIGENE0005790	9	0	-0.03	-1.12	-1.92	-	--	-	-	-	-
UNIGENE0005811	9	0	-0.12	-0.5	-1.47	-	--	-	-	-	-
UNIGENE0005914	9	0	0.43	-0.45	-0.99	-	--	-	-	-	-
UNIGENE0005943	9	0	-0.03	-0.77	-1.91	-	--	-	-	-	-
UNIGENE0005972	9	0	0.29	-0.5	-1	-	--	-	-	-	-
UNIGENE0005977	9	0	0.5	-0.63	-2.31	-	--	-	-	-	-
UNIGENE0006158	9	0	-0.02	-1.11	-1.99	-	--	-	-	-	-
UNIGENE0006163	9	0	-0.13	-0.46	-1.27	Slc7a10	PREDICTED: asc-type amino acid transporter 1 [Danio rerio]	-	GO:0031224//intrinsic component of membrane;GO:0044425//membrane part;GO:0016020//membrane	GO:0022892//substrate-specific transporter activity;GO:0022857//transmembrane transporter activity;GO:0008509//anion transmembrane transporter activity;GO:0005215//transporter activity;GO:0005342//organic acid transmembrane transporter activity;GO:0008514//organic anion transmembrane transporter activity;GO:0015075//ion transmembrane transporter activity;GO:0022891//substrate-specific transmembra…	-
UNIGENE0006285	9	0	0.35	-0.38	-0.95	-	--	-	-	-	-
UNIGENE0006563	9	0	-0.11	-0.6	-1.13	-	--	-	-	-	-
UNIGENE0006608	9	0	0.2	-0.53	-0.94	-	--	-	-	-	-
UNIGENE0006745	9	0	0.08	-0.39	-1.13	-	--	-	-	-	-
UNIGENE0006825	9	0	0.11	-0.49	-1.34	MYH7	slow myosin heavy chain 3 [Danio rerio]	ko04530//Tight junction//Cellular commiunity//Cellular Processes	GO:0044424//intracellular part;GO:0005622//intracellular;GO:0043226//organelle;GO:0005856//cytoskeleton;GO:0005623//cell;GO:0043232//intracellular non-membrane-bounded organelle;GO:0043228//non-membrane-bounded organelle;GO:0015629//actin cytoskeleton;GO:0043229//intracellular organelle;GO:0044464//cell part	GO:0005488//binding;GO:0017111//nucleoside-triphosphatase activity;GO:0097159//organic cyclic compound binding;GO:0003779//actin binding;GO:0001883//purine nucleoside binding;GO:0016817//hydrolase activity, acting on acid anhydrides;GO:0003824//catalytic activity;GO:0008092//cytoskeletal protein binding;GO:0005515//protein binding;GO:0032550//purine ribonucleoside binding;GO:0097367//carbohydrate…	GO:0048869//cellular developmental process;GO:0044699//single-organism process;GO:0006936//muscle contraction;GO:0032989//cellular component morphogenesis;GO:0014721//twitch skeletal muscle contraction;GO:0022607//cellular component assembly;GO:0003012//muscle system process;GO:0003008//system process;GO:0032502//developmental process;GO:0048856//anatomical structure development;GO:0044085//cellu…
UNIGENE0007005	9	0	0.53	-0.77	-2.09	-	--	-	-	-	-
UNIGENE0007130	9	0	0.64	-1.16	-1.9	-	--	-	-	-	-
UNIGENE0007223	9	0	0.32	-1.11	-1.91	-	--	-	-	-	-
UNIGENE0007277	9	0	0.15	-0.51	-1.5	-	--	-	-	-	-
UNIGENE0007388	9	0	0.05	-1.61	-2.75	-	--	-	-	-	-
UNIGENE0007475	9	0	0.06	-1.09	-1.66	-	trichohyalin-like [Scleropages formosus]	-	-	-	-
UNIGENE0007480	9	0	0.68	-2.42	-9.55	-	PREDICTED: LOW QUALITY PROTEIN: leucine zipper protein 4 [Panthera pardus]	-	-	-	-
UNIGENE0007513	9	0	-0.47	-0.86	-2.05	-	--	-	-	-	-
UNIGENE0007519	9	0	0.13	-0.6	-2.1	-	--	-	-	-	-
UNIGENE0007734	9	0	0.18	-1.25	-2.18	-	--	-	-	-	-
UNIGENE0007744	9	0	-0.1	-0.78	-2.81	-	--	-	-	-	-
UNIGENE0007900	9	0	0.34	-0.47	-0.75	ZNF180	PREDICTED: zinc finger protein 664-like [Cyprinus carpio]	-	-	-	-
UNIGENE0007938	9	0	0.64	-0.58	-3.1	-	--	-	-	-	-
UNIGENE0008232	9	0	0.25	-0.3	-1.39	-	--	-	-	-	-
UNIGENE0008698	9	0	-0.12	-0.93	-1.79	-	--	-	-	-	-
UNIGENE0008700	9	0	0.25	-0.32	-0.77	si:ch211-163l21.7	PREDICTED: uncharacterized protein C1orf194 homolog [Sinocyclocheilus rhinocerous]	-	-	-	-
UNIGENE0008786	9	0	0.06	-0.58	-1.08	-	hypothetical protein cypCar_00030139 [Cyprinus carpio]	-	-	-	-
UNIGENE0008936	9	0	-0.02	-0.46	-1.51	-	--	-	-	-	-
UNIGENE0009007	9	0	-0.06	-0.71	-1.2	-	--	-	-	-	-
UNIGENE0009366	9	0	0.21	-0.61	-1.25	-	--	-	-	-	-
UNIGENE0009985	9	0	0.45	-0.56	-0.86	-	--	-	-	-	-
UNIGENE0010199	9	0	0.2	-0.46	-1.01	-	--	-	-	-	-
UNIGENE0010304	9	0	0.33	-0.47	-0.9	-	Zgc:153619 [Danio rerio]	-	-	-	-
UNIGENE0010375	9	0	0.38	-0.52	-1.21	-	--	-	-	-	-
UNIGENE0010926	9	0	0.01	-0.7	-1.29	WDY	PREDICTED: WD repeat-containing protein on Y chromosome-like [Sinocyclocheilus rhinocerous]	-	-	-	-
UNIGENE0010970	9	0	0.26	-0.77	-1.52	-	--	-	-	-	-
UNIGENE0011030	9	0	0.41	-0.48	-1.27	-	--	-	-	-	-
UNIGENE0011051	9	0	0.7	-2.08	-6.5	-	--	-	-	-	-
UNIGENE0011173	9	0	0.36	-0.56	-1.16	Rnh1	PREDICTED: ribonuclease inhibitor-like, partial [Cyprinus carpio]	-	-	-	-
UNIGENE0011212	9	0	0.39	-0.33	-1.16	-	--	-	-	-	-
UNIGENE0011241	9	0	0.23	-1.51	-3.01	-	--	-	-	-	-
UNIGENE0011304	9	0	0.22	-0.55	-0.87	TEKT1	PREDICTED: tektin-1 [Cyprinus carpio]	-	GO:0043232//intracellular non-membrane-bounded organelle;GO:0044464//cell part;GO:0005623//cell;GO:0043228//non-membrane-bounded organelle;GO:0005856//cytoskeleton;GO:0043226//organelle;GO:0005622//intracellular;GO:0043229//intracellular organelle;GO:0044424//intracellular part;GO:0015630//microtubule cytoskeleton	-	GO:0007017//microtubule-based process;GO:0044699//single-organism process;GO:0009987//cellular process;GO:0044763//single-organism cellular process
UNIGENE0011364	9	0	-0.17	-1.06	-1.75	-	--	-	-	-	-
UNIGENE0011434	9	0	0.56	-0.61	-1.12	-	--	-	-	-	-
UNIGENE0011443	9	0	0.86	-0.9	-2.11	-	PREDICTED: RNA-directed DNA polymerase from mobile element jockey-like [Cyprinus carpio]	-	-	-	-
UNIGENE0011469	9	0	-0.15	-1.27	-1.77	-	--	-	-	-	-
UNIGENE0011547	9	0	0.55	-0.63	-1.11	-	--	-	-	-	-
UNIGENE0011672	9	0	0.26	-0.98	-1.74	-	--	-	-	-	-
UNIGENE0011700	9	0	0.09	-0.89	-1.36	-	--	-	-	-	-
UNIGENE0011737	9	0	0.23	-1.02	-1.79	-	--	-	-	-	-
UNIGENE0011768	9	0	0.14	-1.48	-2.24	-	PREDICTED: zinc finger matrin-type protein 3-like [Cyprinus carpio]	-	-	-	-
UNIGENE0012039	9	0	0.37	-0.74	-1.09	-	--	-	-	-	-
UNIGENE0012090	9	0	0.2	-0.56	-1.05	-	cxorf58 protein, partial [Xenopus tropicalis]	-	-	-	-
UNIGENE0012214	9	0	0.21	-0.48	-0.92	Myh7	PREDICTED: myosin-7-like [Sinocyclocheilus grahami]	ko04261//Adrenergic signaling in cardiomyocytes//Circulatory system//Organismal Systems;ko04530//Tight junction//Cellular commiunity//Cellular Processes;ko04260//Cardiac muscle contraction//Circulatory system//Organismal Systems	GO:0005622//intracellular;GO:0044424//intracellular part;GO:0043228//non-membrane-bounded organelle;GO:0005856//cytoskeleton;GO:0043229//intracellular organelle;GO:0015629//actin cytoskeleton;GO:0043226//organelle;GO:0005623//cell;GO:0043232//intracellular non-membrane-bounded organelle;GO:0044464//cell part	GO:0003824//catalytic activity;GO:0097367//carbohydrate derivative binding;GO:0008092//cytoskeletal protein binding;GO:0001883//purine nucleoside binding;GO:0016787//hydrolase activity;GO:0036094//small molecule binding;GO:0032550//purine ribonucleoside binding;GO:0016818//hydrolase activity, acting on acid anhydrides, in phosphorus-containing anhydrides;GO:0005515//protein binding;GO:0097159//or…	GO:0048856//anatomical structure development;GO:0044767//single-organism developmental process;GO:0032501//multicellular organismal process;GO:0009790//embryo development;GO:0044699//single-organism process;GO:0007275//multicellular organism development;GO:0032502//developmental process;GO:0044707//single-multicellular organism process
UNIGENE0012252	9	0	0.21	-0.89	-2.44	-	--	-	-	-	-
UNIGENE0012372	9	0	-0.14	-0.8	-1.88	-	--	-	-	-	-
UNIGENE0012628	9	0	0.29	-0.55	-1.25	-	--	-	-	-	-
UNIGENE0012650	9	0	0.16	-0.5	-1.58	-	--	-	-	-	-
UNIGENE0012751	9	0	-0.05	-0.89	-2.43	-	--	-	-	-	-
UNIGENE0012805	9	0	-0.41	-2.02	-3.65	-	--	-	-	-	-
UNIGENE0012816	9	0	0.14	-2.05	-3.33	-	--	-	-	-	-
UNIGENE0012819	9	0	-0.79	-2.02	-4.51	-	--	-	-	-	-
UNIGENE0012922	9	0	-0.24	-0.62	-1.84	-	--	-	-	-	-
UNIGENE0013084	9	0	0.57	-1.35	-2.83	-	--	-	-	-	-
UNIGENE0013227	9	0	-0.21	-0.98	-1.74	-	--	-	-	-	-
UNIGENE0013281	9	0	0.48	-0.45	-1.86	-	--	-	-	-	-
UNIGENE0013320	9	0	0.55	-1	-1.85	-	--	-	-	-	-
UNIGENE0013412	9	0	0.61	-0.72	-1.62	-	--	-	-	-	-
UNIGENE0013450	9	0	0.2	-0.61	-0.98	-	--	-	-	-	-
UNIGENE0013507	9	0	-0.06	-1.33	-2.83	-	--	-	-	-	-
UNIGENE0013542	9	0	-0.25	-1.7	-3.18	-	--	-	-	-	-
UNIGENE0013801	9	0	0.01	-0.42	-1.51	-	--	-	-	-	-
UNIGENE0013828	9	0	-0.12	-1.24	-3.21	-	--	-	-	-	-
UNIGENE0013829	9	0	0.3	-0.99	-2.11	-	--	-	-	-	-
UNIGENE0013907	9	0	0.02	-0.91	-2.24	-	--	-	-	-	-
UNIGENE0014059	9	0	0.32	-0.96	-1.76	-	--	-	-	-	-
UNIGENE0014127	9	0	-0.54	-1.41	-3.38	-	--	-	-	-	-
UNIGENE0014291	9	0	-0.38	-1.3	-2.34	-	--	-	-	-	-
UNIGENE0014394	9	0	0.75	-1.56	-2.47	-	--	-	-	-	-
UNIGENE0014729	9	0	-0.34	-2.05	-3.79	-	--	-	-	-	-
UNIGENE0014965	9	0	0.59	-0.71	-1.25	-	--	-	-	-	-
UNIGENE0015292	9	0	0.48	-0.54	-1	-	ubquitin-like protein 1 [Carassius auratus]	-	-	-	-
UNIGENE0015382	9	0	0.74	-0.8	-2.18	-	--	-	-	-	-
UNIGENE0015428	9	0	-0.22	-1.1	-2.67	-	--	-	-	-	-
UNIGENE0015536	9	0	0.47	-1.12	-3.49	-	--	-	-	-	-
UNIGENE0015734	9	0	0.47	-0.77	-1.5	-	--	-	-	-	-
UNIGENE0015764	9	0	-0.1	-1.6	-2.29	-	--	-	-	-	-
UNIGENE0015812	9	0	-0.38	-1.49	-2.65	-	--	-	-	-	-
UNIGENE0015909	9	0	-0.01	-1.33	-4.36	-	PREDICTED: uncharacterized protein LOC109068123 [Cyprinus carpio]	-	-	-	-
UNIGENE0016134	9	0	-0.12	-1.35	-2.02	-	--	-	-	-	-
UNIGENE0016545	9	0	0.11	-0.81	-1.2	-	--	-	-	-	-
UNIGENE0016796	9	0	0.15	-1.14	-1.88	-	--	-	-	-	-
UNIGENE0016875	9	0	-0.05	-1	-1.51	-	--	-	-	-	-
UNIGENE0017156	9	0	-0.12	-1.76	-3.92	-	--	-	-	-	-
UNIGENE0017227	9	0	0.41	-0.53	-0.93	-	--	-	-	-	-
UNIGENE0017369	9	0	1.57	-1.76	-2.97	-	--	-	-	-	-
UNIGENE0017394	9	0	0.9	-0.79	-2.84	-	--	-	-	-	-
UNIGENE0017601	9	0	0.97	-3.04	-8.17	-	--	-	-	-	-
UNIGENE0017838	9	0	-0.03	-1.76	-4.63	-	--	-	-	-	-
UNIGENE0017970	9	0	0.15	-0.72	-1.26	-	--	-	-	-	-
UNIGENE0018003	9	0	0.06	-1.68	-3.57	-	--	-	-	-	-
UNIGENE0018213	9	0	0.14	-0.46	-1.28	-	--	-	-	-	-
UNIGENE0018537	9	0	0.35	-0.74	-1.35	Pak4	PREDICTED: serine/threonine-protein kinase PAK 6-like isoform X2 [Sinocyclocheilus rhinocerous]	ko04510//Focal adhesion//Cellular commiunity//Cellular Processes;ko04810//Regulation of actin cytoskeleton//Cell motility//Cellular Processes;ko04012//ErbB signaling pathway//Signal transduction//Environmental Information Processing	-	-	-
UNIGENE0018805	9	0	-0.31	-1.02	-2.36	-	--	-	-	-	-
UNIGENE0019034	9	0	-0.05	-0.83	-1.42	-	--	-	-	-	-
UNIGENE0019059	9	0	-0.17	-0.55	-1.88	-	--	-	-	-	-
UNIGENE0019064	9	0	0.32	-0.36	-1.76	foxi1e	PREDICTED: forkhead box protein I1-like [Sinocyclocheilus anshuiensis]	-	-	-	-
UNIGENE0019164	9	0	-0.22	-0.88	-2.1	-	--	-	-	-	-
UNIGENE0019412	9	0	0.8	-2.41	-8.32	CCL25	PREDICTED: C-C motif chemokine 28-like [Sinocyclocheilus grahami]	ko04060//Cytokine-cytokine receptor interaction//Signaling molecules and interaction//Environmental Information Processing;ko04672//Intestinal immune network for IgA production//Immune system//Organismal Systems	GO:0044421//extracellular region part;GO:0005576//extracellular region	GO:0005125//cytokine activity;GO:0005102//receptor binding;GO:0005515//protein binding;GO:0005488//binding	-
UNIGENE0019506	9	0	-0.54	-1.17	-2.78	-	--	-	-	-	-
UNIGENE0019811	9	0	-0.04	-1.11	-2.32	-	--	-	-	-	-
UNIGENE0019857	9	0	0.4	-0.63	-1.51	-	--	-	-	-	-
UNIGENE0019870	9	0	0.4	-1.57	-2.36	-	--	-	-	-	-
UNIGENE0019876	9	0	0.3	-0.58	-1.71	-	--	-	-	-	-
UNIGENE0019924	9	0	0.11	-0.65	-2.51	crygs	crystallin, gamma S2 [Danio rerio]	-	-	-	-
UNIGENE0020028	9	0	0.34	-1.37	-2.12	-	--	-	-	-	-
UNIGENE0020465	9	0	0.08	-0.49	-1.11	ZNF260	PREDICTED: zinc finger protein 239-like isoform X1 [Sinocyclocheilus rhinocerous]	-	-	-	-
UNIGENE0020484	9	0	-0.28	-0.55	-1.75	FAM117B	PREDICTED: protein FAM117B-like [Sinocyclocheilus rhinocerous]	-	-	-	-
UNIGENE0020629	9	0	0.13	-0.79	-1.55	-	--	-	-	-	-
UNIGENE0020844	9	0	0.36	-0.44	-0.9	si:ch211-248e11.2	PREDICTED: UPF0691 protein C9orf116 homolog [Sinocyclocheilus rhinocerous]	-	-	-	-
UNIGENE0021003	9	0	0.2	-0.36	-1.63	-	--	-	-	-	-
UNIGENE0021202	9	0	0.29	-0.39	-0.91	MORN3	PREDICTED: MORN repeat-containing protein 3 isoform X1 [Cyprinus carpio]	-	-	-	-
UNIGENE0021324	9	0	0.28	-0.54	-1.89	-	PREDICTED: retinitis pigmentosa 1-like 1 protein [Sinocyclocheilus rhinocerous]	-	-	-	-
UNIGENE0021496	9	0	-0.22	-0.88	-1.61	-	--	-	-	-	-
UNIGENE0021676	9	0	0.23	-0.65	-0.94	RAB36	PREDICTED: ras-related protein Rab-36-like isoform X2 [Cyprinus carpio]	-	-	GO:1901363//heterocyclic compound binding;GO:0003824//catalytic activity;GO:0032550//purine ribonucleoside binding;GO:0001882//nucleoside binding;GO:0036094//small molecule binding;GO:0032549//ribonucleoside binding;GO:0097367//carbohydrate derivative binding;GO:0005488//binding;GO:0001883//purine nucleoside binding;GO:0097159//organic cyclic compound binding	GO:0007165//signal transduction;GO:0050794//regulation of cellular process;GO:0044700//single organism signaling;GO:0065007//biological regulation;GO:0050896//response to stimulus;GO:0051716//cellular response to stimulus;GO:0050789//regulation of biological process;GO:0023052//signaling;GO:0007154//cell communication;GO:0009987//cellular process;GO:0044763//single-organism cellular process;GO:00…
UNIGENE0021710	9	0	-0.09	-1.21	-1.68	-	--	-	-	-	-
UNIGENE0022080	9	0	0.27	-0.62	-1.27	fam32al	PREDICTED: protein FAM32A [Sinocyclocheilus grahami]	-	GO:0043231//intracellular membrane-bounded organelle;GO:0043229//intracellular organelle;GO:0043227//membrane-bounded organelle;GO:0044464//cell part;GO:0005623//cell;GO:0043226//organelle;GO:0044424//intracellular part;GO:0005622//intracellular	-	GO:0016265//death;GO:0009987//cellular process;GO:0012501//programmed cell death;GO:0044763//single-organism cellular process;GO:0044699//single-organism process;GO:0008219//cell death
UNIGENE0022093	9	0	0.24	-0.49	-1.32	-	PREDICTED: low density lipoprotein receptor adapter protein 1-B-like isoform X1 [Sinocyclocheilus grahami]	-	-	-	-
UNIGENE0022288	9	0	-0.34	-0.94	-2.51	-	--	-	-	-	-
UNIGENE0022308	9	0	0.08	-0.86	-1.39	GM2	PREDICTED: gamma-crystallin M2-like [Sinocyclocheilus grahami]	-	-	-	-
UNIGENE0022393	9	0	-0.19	-0.65	-1.5	-	--	-	-	-	-
UNIGENE0022426	9	0	0.29	-0.21	-0.97	-	--	-	-	-	-
UNIGENE0022673	9	0	0.63	-0.68	-2.67	-	--	-	-	-	-
UNIGENE0022709	9	0	0.39	-0.68	-1.11	-	--	-	-	-	-
UNIGENE0023105	9	0	-0.16	-0.64	-2.18	-	--	-	-	-	-
UNIGENE0023221	9	0	-0.04	-0.72	-1.07	Pla2g16	retinoic acid receptor responder protein 3 [Danio rerio]	ko01100//Metabolic pathways//Global and Overview//Metabolism;ko01110//Biosynthesis of secondary metabolites//Global and Overview//Metabolism;ko00564//Glycerophospholipid metabolism//Lipid metabolism//Metabolism;ko00590//Arachidonic acid metabolism//Lipid metabolism//Metabolism;ko00565//Ether lipid metabolism//Lipid metabolism//Metabolism;ko00591//Linoleic acid metabolism//Lipid metabolism//Metabo…	-	-	-
UNIGENE0023408	9	0	-0.06	-0.75	-1.73	-	--	-	-	-	-
UNIGENE0023422	9	0	-0.05	-0.84	-1.34	myod1	myogenic differentiation 1 [Megalobrama amblycephala]	-	GO:0044424//intracellular part;GO:0043226//organelle;GO:0005622//intracellular;GO:0031981//nuclear lumen;GO:0043231//intracellular membrane-bounded organelle;GO:0043229//intracellular organelle;GO:0044464//cell part;GO:0005623//cell;GO:0043227//membrane-bounded organelle;GO:0031974//membrane-enclosed lumen;GO:0005634//nucleus;GO:0044422//organelle part;GO:0070013//intracellular organelle lumen;GO…	GO:0044212//transcription regulatory region DNA binding;GO:0000975//regulatory region DNA binding;GO:0044877//macromolecular complex binding;GO:0003676//nucleic acid binding;GO:1901363//heterocyclic compound binding;GO:0001067//regulatory region nucleic acid binding;GO:0005488//binding;GO:0097159//organic cyclic compound binding;GO:0003677//DNA binding;GO:0005515//protein binding;GO:0003682//chro…	GO:0042221//response to chemical;GO:0048513//animal organ development;GO:0043627//response to estrogen;GO:1902589//single-organism organelle organization;GO:0016570//histone modification;GO:0044249//cellular biosynthetic process;GO:0044271//cellular nitrogen compound biosynthetic process;GO:0006464//cellular protein modification process;GO:0019538//protein metabolic process;GO:0006996//organelle …
UNIGENE0023499	9	0	0.01	-0.77	-1.08	-	--	-	-	-	-
UNIGENE0023765	9	0	0.32	-0.59	-1.32	-	--	-	-	-	-
UNIGENE0023766	9	0	0.33	-0.35	-0.71	C17orf105	hypothetical protein cypCar_00013332 [Cyprinus carpio]	ko04120//Ubiquitin mediated proteolysis//Folding, sorting and degradation//Genetic Information Processing	-	-	-
UNIGENE0024001	9	0	0.31	-0.48	-0.96	-	PREDICTED: CD276 antigen-like [Ictalurus punctatus]	ko04514//Cell adhesion molecules (CAMs)//Signaling molecules and interaction//Environmental Information Processing	-	-	-
UNIGENE0024040	9	0	0.1	-0.53	-1.02	Cntd1	PREDICTED: cyclin N-terminal domain-containing protein 1 [Sinocyclocheilus anshuiensis]	-	-	-	-
UNIGENE0024374	9	0	0.68	-0.93	-1.91	-	--	-	-	-	-
UNIGENE0024581	9	0	0.07	-1.24	-2.03	-	--	-	-	-	-
UNIGENE0024789	9	0	0.69	-0.83	-1.41	-	--	-	-	-	-
UNIGENE0024870	9	0	0.21	-1.02	-1.55	-	--	-	-	-	-
UNIGENE0024917	9	0	0.31	-0.45	-0.71	tdp2	PREDICTED: tyrosyl-DNA phosphodiesterase 2 [Sinocyclocheilus rhinocerous]	-	GO:0043233//organelle lumen;GO:0044422//organelle part;GO:0044464//cell part;GO:0044446//intracellular organelle part;GO:0043231//intracellular membrane-bounded organelle;GO:0044428//nuclear part;GO:0070013//intracellular organelle lumen;GO:0005622//intracellular;GO:0043226//organelle;GO:0043227//membrane-bounded organelle;GO:0031981//nuclear lumen;GO:0044424//intracellular part;GO:0016604//nucle…	GO:0003824//catalytic activity;GO:0046914//transition metal ion binding;GO:0043167//ion binding;GO:1901363//heterocyclic compound binding;GO:0003677//DNA binding;GO:0046872//metal ion binding;GO:0070259//tyrosyl-DNA phosphodiesterase activity;GO:0043566//structure-specific DNA binding;GO:0005488//binding;GO:0016787//hydrolase activity;GO:0097159//organic cyclic compound binding;GO:0003676//nuclei…	GO:0044710//single-organism metabolic process;GO:0042221//response to chemical;GO:0007178//transmembrane receptor protein serine/threonine kinase signaling pathway;GO:0043170//macromolecule metabolic process;GO:0044700//single organism signaling;GO:0006259//DNA metabolic process;GO:0009719//response to endogenous stimulus;GO:0048598//embryonic morphogenesis;GO:0032501//multicellular organismal pr…
UNIGENE0024928	9	0	0.37	-0.75	-1.75	-	--	-	-	-	-
UNIGENE0025200	9	0	-0.42	-1.99	-3.38	-	--	-	-	-	-
UNIGENE0025287	9	0	0.21	-1.18	-2.06	-	--	-	-	-	-
UNIGENE0025345	9	0	-0.16	-1.36	-1.92	-	PREDICTED: LOW QUALITY PROTEIN: protein phosphatase 1 regulatory subunit 12A [Xiphophorus maculatus]	ko04510//Focal adhesion//Cellular commiunity//Cellular Processes;ko04810//Regulation of actin cytoskeleton//Cell motility//Cellular Processes;ko04270//Vascular smooth muscle contraction//Circulatory system//Organismal Systems	-	-	-
UNIGENE0025362	9	0	0.31	-0.31	-0.91	Bspry	PREDICTED: B box and SPRY domain-containing protein-like [Sinocyclocheilus rhinocerous]	-	-	GO:0046872//metal ion binding;GO:0005488//binding;GO:0046914//transition metal ion binding;GO:0043169//cation binding;GO:0043167//ion binding	-
UNIGENE0025400	9	0	0.23	-0.58	-1.3	-	--	-	-	-	-
UNIGENE0025428	9	0	0.29	-0.43	-1.03	Fbxo36	PREDICTED: F-box only protein 36-like [Sinocyclocheilus rhinocerous]	-	-	-	-
UNIGENE0025773	9	0	0.31	-0.64	-1.23	RTase	PREDICTED: RNA-directed DNA polymerase from mobile element jockey-like [Cyprinus carpio]	-	-	-	-
UNIGENE0025802	9	0	-0.08	-0.82	-2.08	-	--	-	-	-	-
UNIGENE0026003	9	0	0.28	-0.53	-2.2	-	--	-	-	-	-
UNIGENE0026247	9	0	-0.07	-0.6	-1.54	-	--	-	-	-	-
UNIGENE0026421	9	0	0.28	-0.41	-0.82	-	--	-	-	-	-
UNIGENE0026459	9	0	-0.28	-0.68	-1.54	Pex5l	PREDICTED: PEX5-related protein-like isoform X1 [Sinocyclocheilus anshuiensis]	ko04146//Peroxisome//Transport and catabolism//Cellular Processes	-	-	-
UNIGENE0026776	9	0	0.91	-2.11	-8.5	-	--	-	-	-	-
UNIGENE0026851	9	0	-0.15	-0.96	-1.51	-	--	-	-	-	-
UNIGENE0026969	9	0	0.5	-0.65	-2.44	-	--	-	-	-	-
UNIGENE0027018	9	0	0.27	-0.26	-0.91	MCPH1	PREDICTED: microcephalin-like [Sinocyclocheilus grahami]	-	-	-	-
UNIGENE0027059	9	0	-0.12	-0.99	-3.56	-	--	-	-	-	-
UNIGENE0027067	9	0	0.34	-0.53	-0.87	dnaaf1	PREDICTED: dynein assembly factor 1, axonemal-like [Sinocyclocheilus grahami]	-	GO:0044464//cell part;GO:0044422//organelle part;GO:0044463//cell projection part;GO:0044441//ciliary part;GO:0043226//organelle;GO:0042995//cell projection;GO:0005929//cilium;GO:0005623//cell	GO:0005515//protein binding;GO:0005488//binding	GO:0035295//tube development;GO:0072358//cardiovascular system development;GO:0030030//cell projection organization;GO:0009790//embryo development;GO:0051179//localization;GO:0035239//tube morphogenesis;GO:0048729//tissue morphogenesis;GO:0048568//embryonic organ development;GO:0009887//organ morphogenesis;GO:0044763//single-organism cellular process;GO:0001655//urogenital system development;GO:0…
UNIGENE0027076	9	0	-0.74	-1.5	-4.48	-	--	-	-	-	-
UNIGENE0027349	9	0	-0.23	-0.65	-1.47	Kcne2	potassium voltage-gated channel Isk-related subfamily member 1 [Carassius carassius]	ko04261//Adrenergic signaling in cardiomyocytes//Circulatory system//Organismal Systems	-	-	-
UNIGENE0027361	9	0	0.43	-0.91	-1.86	RP1L1	PREDICTED: retinitis pigmentosa 1-like 1 protein [Sinocyclocheilus rhinocerous]	-	-	-	-
UNIGENE0027553	9	0	-0.44	-2.02	-3.27	-	--	-	-	-	-
UNIGENE0027702	9	0	-0.13	-0.58	-1.53	-	--	-	-	-	-
UNIGENE0027778	9	0	0.08	-0.38	-1.21	-	hypothetical protein cypCar_00016605 [Cyprinus carpio]	-	-	-	-
UNIGENE0027871	9	0	0.35	-0.57	-0.94	TMEM81	PREDICTED: transmembrane protein 81 [Cyprinus carpio]	-	-	-	-
UNIGENE0027874	9	0	-0.01	-0.72	-1.58	cyp17a1	17a-hydroxylase/lyase [Gobiocypris rarus]	ko01100//Metabolic pathways//Global and Overview//Metabolism;ko00140//Steroid hormone biosynthesis//Lipid metabolism//Metabolism	-	GO:0016491//oxidoreductase activity;GO:0046872//metal ion binding;GO:0003824//catalytic activity;GO:0043169//cation binding;GO:0043167//ion binding;GO:1901363//heterocyclic compound binding;GO:0046906//tetrapyrrole binding;GO:0005488//binding;GO:0046914//transition metal ion binding;GO:0097159//organic cyclic compound binding	GO:0044699//single-organism process;GO:0044710//single-organism metabolic process;GO:0008152//metabolic process
UNIGENE0027960	9	0	0.21	-0.37	-0.94	-	PREDICTED: uncharacterized protein im:7157825 isoform X5 [Danio rerio]	-	-	-	-
UNIGENE0028085	9	0	0.39	-0.4	-1.24	-	--	-	-	-	-
UNIGENE0028101	9	0	0.28	-0.59	-1.51	-	--	-	-	-	-
UNIGENE0028155	9	0	0.4	-0.57	-2.79	-	hypothetical protein cypCar_00035464, partial [Cyprinus carpio]	-	-	-	-
UNIGENE0028166	9	0	0.53	-0.53	-1.78	-	--	-	-	-	-
UNIGENE0028392	9	0	0.27	-1.22	-1.89	-	--	-	-	-	-
UNIGENE0028471	9	0	-0.09	-0.97	-1.41	Os04g0445000	PREDICTED: potassium channel GORK-like [Sinocyclocheilus rhinocerous]	-	-	-	-
UNIGENE0028504	9	0	0	-1.07	-1.79	-	--	-	-	-	-
UNIGENE0028510	9	0	0.31	-0.43	-0.79	TTLL2	PREDICTED: probable tubulin polyglutamylase TTLL2 [Sinocyclocheilus rhinocerous]	-	-	GO:0003824//catalytic activity	-
UNIGENE0028718	9	0	-0.28	-0.99	-1.65	-	--	-	-	-	-
UNIGENE0029121	9	0	0.35	-0.63	-1.17	RNF166	PREDICTED: nuclear factor 7, ovary-like [Sinocyclocheilus grahami]	-	GO:0044464//cell part;GO:0005623//cell	GO:0043167//ion binding;GO:0005488//binding;GO:0043169//cation binding	-
UNIGENE0029157	9	0	-0.1	-0.73	-1.1	Meiob	PREDICTED: meiosis-specific with OB domain-containing protein-like [Sinocyclocheilus rhinocerous]	-	-	-	-
UNIGENE0029296	9	0	0.19	-0.62	-0.94	KCNB2	PREDICTED: potassium voltage-gated channel subfamily B member 2-like [Cyprinus carpio]	-	-	-	-
UNIGENE0029584	9	0	0.17	-0.55	-1.07	CYP11B	PREDICTED: cytochrome P450 11B, mitochondrial-like [Sinocyclocheilus anshuiensis]	ko01100//Metabolic pathways//Global and Overview//Metabolism;ko00140//Steroid hormone biosynthesis//Lipid metabolism//Metabolism	-	GO:0046914//transition metal ion binding;GO:0005488//binding;GO:1901363//heterocyclic compound binding;GO:0046872//metal ion binding;GO:0016491//oxidoreductase activity;GO:0097159//organic cyclic compound binding;GO:0003824//catalytic activity;GO:0046906//tetrapyrrole binding;GO:0043167//ion binding;GO:0043169//cation binding	GO:0044699//single-organism process;GO:0008152//metabolic process;GO:0044710//single-organism metabolic process
UNIGENE0029741	9	0	-0.06	-0.96	-2.9	-	PREDICTED: uncharacterized protein LOC109088059 [Cyprinus carpio]	-	-	-	-
UNIGENE0029997	9	0	0.25	-0.71	-1.56	-	--	-	-	-	-
UNIGENE0029998	9	0	0.21	-0.42	-0.81	-	PREDICTED: uncharacterized protein LOC107720525 [Sinocyclocheilus rhinocerous]	-	-	-	-
UNIGENE0030082	9	0	-0.35	-1.63	-4.8	-	--	-	-	-	-
UNIGENE0030135	9	0	0	-0.47	-1.13	rnasekb	PREDICTED: ribonuclease kappa-B isoform X2 [Cyprinus carpio]	-	GO:0016020//membrane;GO:0031224//intrinsic component of membrane;GO:0044425//membrane part	GO:0003824//catalytic activity;GO:0016788//hydrolase activity, acting on ester bonds;GO:0004518//nuclease activity;GO:0016787//hydrolase activity;GO:0004519//endonuclease activity	GO:0008152//metabolic process;GO:0097659//nucleic acid-templated transcription;GO:0044260//cellular macromolecule metabolic process;GO:0090305//nucleic acid phosphodiester bond hydrolysis;GO:1901360//organic cyclic compound metabolic process;GO:0043170//macromolecule metabolic process;GO:0034645//cellular macromolecule biosynthetic process;GO:0009059//macromolecule biosynthetic process;GO:1901362…
UNIGENE0030186	9	0	0.28	-0.49	-1.12	-	hypothetical protein cypCar_00014470 [Cyprinus carpio]	-	-	-	-
UNIGENE0030212	9	0	-0.08	-0.45	-1.04	-	Gig2-like protein CauD [Carassius auratus]	-	GO:0044424//intracellular part;GO:0005622//intracellular;GO:0005623//cell;GO:0044464//cell part	GO:0016740//transferase activity;GO:0016757//transferase activity, transferring glycosyl groups;GO:0016763//transferase activity, transferring pentosyl groups;GO:0003824//catalytic activity	-
UNIGENE0030452	9	0	0.44	-1.18	-1.87	-	PREDICTED: zinc finger protein 135-like isoform X1 [Esox lucius]	-	-	-	-
UNIGENE0030621	9	0	-0.15	-0.85	-1.75	star	steroidogenic acute regulator protein [Gobiocypris rarus]	-	GO:0043227//membrane-bounded organelle;GO:0044424//intracellular part;GO:0005622//intracellular;GO:0043229//intracellular organelle;GO:0005623//cell;GO:0044464//cell part;GO:0043231//intracellular membrane-bounded organelle;GO:0043226//organelle	GO:0005496//steroid binding;GO:0043178//alcohol binding;GO:0005319//lipid transporter activity;GO:0008289//lipid binding;GO:0005215//transporter activity;GO:0097159//organic cyclic compound binding;GO:0022892//substrate-specific transporter activity;GO:0036094//small molecule binding;GO:0015248//sterol transporter activity;GO:0032934//sterol binding;GO:0005488//binding	GO:0044710//single-organism metabolic process;GO:0071702//organic substance transport;GO:0016125//sterol metabolic process;GO:0033036//macromolecule localization;GO:1901615//organic hydroxy compound metabolic process;GO:0015850//organic hydroxy compound transport;GO:0044281//small molecule metabolic process;GO:0044765//single-organism transport;GO:0044699//single-organism process;GO:0008152//meta…
UNIGENE0030625	9	0	0.23	-0.84	-1.67	-	unnamed protein product [Oncorhynchus mykiss]	-	-	-	-
UNIGENE0030661	9	0	-0.22	-0.6	-1.17	-	--	-	-	-	-
UNIGENE0030967	9	0	-0.07	-0.45	-1.2	RCAN3	PREDICTED: calcipressin-3-like [Sinocyclocheilus grahami]	-	-	-	GO:0044699//single-organism process;GO:0065007//biological regulation;GO:0019932//second-messenger-mediated signaling;GO:0009987//cellular process;GO:0050896//response to stimulus;GO:0044700//single organism signaling;GO:0050794//regulation of cellular process;GO:0023052//signaling;GO:0007165//signal transduction;GO:0007154//cell communication;GO:0050789//regulation of biological process;GO:00517…
UNIGENE0031039	9	0	0.08	-0.89	-1.4	-	PREDICTED: sperm-associated antigen 8-like [Sinocyclocheilus anshuiensis]	-	-	-	-
UNIGENE0031096	9	0	0.11	-0.67	-1.04	Sept4	PREDICTED: septin-2-like [Sinocyclocheilus anshuiensis]	-	GO:0005623//cell;GO:0043232//intracellular non-membrane-bounded organelle;GO:0032156//septin cytoskeleton;GO:0005856//cytoskeleton;GO:0044464//cell part;GO:0043226//organelle;GO:0005622//intracellular;GO:0043228//non-membrane-bounded organelle;GO:0044424//intracellular part;GO:0043229//intracellular organelle	GO:0036094//small molecule binding;GO:0005488//binding	GO:0044763//single-organism cellular process;GO:0044699//single-organism process;GO:0009987//cellular process
UNIGENE0031142	9	0	0.73	-1	-1.81	-	--	-	-	-	-
UNIGENE0031177	9	0	0.2	-0.49	-0.97	Kcna2	PREDICTED: shaker-related potassium channel tsha2-like [Sinocyclocheilus grahami]	-	GO:0031226//intrinsic component of plasma membrane;GO:0044425//membrane part;GO:0016020//membrane;GO:0071944//cell periphery;GO:0044459//plasma membrane part;GO:0005623//cell;GO:0005887//integral component of plasma membrane;GO:0031224//intrinsic component of membrane;GO:0016021//integral component of membrane;GO:0005886//plasma membrane;GO:0044464//cell part	GO:0008324//cation transmembrane transporter activity;GO:0022832//voltage-gated channel activity;GO:0022836//gated channel activity;GO:0022803//passive transmembrane transporter activity;GO:0022890//inorganic cation transmembrane transporter activity;GO:0015077//monovalent inorganic cation transmembrane transporter activity;GO:0005244//voltage-gated ion channel activity;GO:0046873//metal ion tran…	GO:0055085//transmembrane transport;GO:0044699//single-organism process;GO:0071822//protein complex subunit organization;GO:0044085//cellular component biogenesis;GO:0006461//protein complex assembly;GO:0009987//cellular process;GO:0065003//macromolecular complex assembly;GO:1902578//single-organism localization;GO:0006812//cation transport;GO:0044765//single-organism transport;GO:0030001//metal …
UNIGENE0031391	9	0	0.19	-0.48	-0.83	Fam214b	PREDICTED: protein FAM214B-like isoform X2 [Sinocyclocheilus anshuiensis]	-	-	-	-
UNIGENE0031473	9	0	0	-0.88	-2.21	-	--	-	-	-	-
UNIGENE0031724	9	0	0.31	-0.74	-1.49	-	--	-	-	-	-
UNIGENE0031859	9	0	0.08	-2.71	-8.8	-	--	-	-	-	-
UNIGENE0032048	9	0	0.17	-0.73	-1.09	-	PREDICTED: proline-rich extensin-like protein EPR1 [Salmo salar]	-	-	-	-
UNIGENE0032096	9	0	0.14	-2.42	-3.92	-	--	-	-	-	-
UNIGENE0032129	9	0	0.21	-0.35	-0.97	Lmln	PREDICTED: leishmanolysin-like peptidase isoform X2 [Cyprinus carpio]	-	-	-	-
UNIGENE0032159	9	0	-0.33	-0.91	-1.87	-	--	-	-	-	-
UNIGENE0032267	9	0	0.76	-0.99	-2.33	-	--	-	-	-	-
UNIGENE0032430	9	0	0.27	-0.35	-1.58	-	--	-	-	-	-
UNIGENE0032495	9	0	0.24	-0.61	-1.56	-	--	-	-	-	-
UNIGENE0032717	9	0	0.19	-0.57	-0.86	catip	PREDICTED: ciliogenesis-associated TTC17-interacting protein-like [Sinocyclocheilus rhinocerous]	-	GO:0043232//intracellular non-membrane-bounded organelle;GO:0044424//intracellular part;GO:0043226//organelle;GO:0005622//intracellular;GO:0043228//non-membrane-bounded organelle;GO:0016020//membrane;GO:0044464//cell part;GO:0005856//cytoskeleton;GO:0005623//cell;GO:0043229//intracellular organelle	-	-
UNIGENE0032771	9	0	0.2	-0.72	-1.18	-	PREDICTED: C-C motif chemokine 20-like [Sinocyclocheilus anshuiensis]	-	-	-	-
UNIGENE0032779	9	0	0.11	-0.56	-0.92	LRRC23	PREDICTED: leucine-rich repeat-containing protein 23-like [Sinocyclocheilus anshuiensis]	-	-	-	-
UNIGENE0032860	9	0	0.24	-0.43	-1.38	-	--	-	-	-	-
UNIGENE0033405	9	0	0.26	-1.04	-1.71	-	--	-	-	-	-
UNIGENE0033457	9	0	-0.38	-1.69	-2.6	-	--	-	-	-	-
UNIGENE0033577	9	0	0.02	-0.65	-1.01	APCDD1	PREDICTED: protein APCDD1-like [Cyprinus carpio]	-	-	-	-
UNIGENE0033804	9	0	-0.33	-1.56	-3.69	-	--	-	-	-	-
UNIGENE0033861	9	0	0.07	-0.63	-1.04	LRRC48	PREDICTED: dynein regulatory complex subunit 3 [Sinocyclocheilus rhinocerous]	-	-	-	-
UNIGENE0034029	9	0	-0.06	-0.82	-1.89	-	--	-	-	-	-
UNIGENE0034179	9	0	0.4	-0.41	-0.92	-	--	-	-	-	-
UNIGENE0034200	9	0	0.28	-0.55	-0.92	ANKEF1	PREDICTED: ankyrin repeat and EF-hand domain-containing protein 1-like [Cyprinus carpio]	-	-	-	-
UNIGENE0034254	9	0	-0.07	-0.72	-1.14	CCDC152	PREDICTED: coiled-coil domain-containing protein 152-like [Sinocyclocheilus anshuiensis]	-	-	-	-
UNIGENE0034389	9	0	0.28	-0.61	-1.04	dnal1	dynein light chain 1, axonemal [Danio rerio]	-	-	-	-
UNIGENE0034495	9	0	0.11	-0.6	-0.9	F5	PREDICTED: keratin-associated protein 5-4-like [Phaethon lepturus]	-	-	-	-
UNIGENE0034759	9	0	0.69	-0.7	-1.57	-	PREDICTED: uncharacterized protein LOC109102093 isoform X1 [Cyprinus carpio]	-	-	-	-
UNIGENE0034927	9	0	0.19	-0.5	-0.91	-	--	-	-	-	-
UNIGENE0034956	9	0	-0.16	-0.83	-1.49	star	PREDICTED: steroidogenic acute regulatory protein, mitochondrial-like [Sinocyclocheilus anshuiensis]	-	-	-	-
UNIGENE0034969	9	0	-0.2	-1.15	-1.82	IQCA1	PREDICTED: IQ and AAA domain-containing protein 1-like [Sinocyclocheilus anshuiensis]	-	-	-	-
UNIGENE0035090	9	0	0.6	-0.78	-2.45	-	--	-	-	-	-
UNIGENE0035279	9	0	0.66	-0.85	-1.48	-	--	-	-	-	-
UNIGENE0035655	9	0	0.34	-0.48	-0.74	-	--	-	-	-	-
UNIGENE0035754	9	0	-0.06	-0.8	-1.22	-	--	-	-	-	-
UNIGENE0035918	9	0	-0.29	-0.78	-1.61	-	--	-	-	-	-
UNIGENE0035925	9	0	-0.14	-0.64	-1.62	-	--	-	-	-	-
UNIGENE0036018	9	0	0.12	-0.93	-1.32	Tmc7	PREDICTED: transmembrane channel-like protein 7 [Sinocyclocheilus rhinocerous]	-	-	-	-
UNIGENE0036019	9	0	0.04	-1.15	-1.87	-	--	-	-	-	-
UNIGENE0036229	9	0	0.19	-0.65	-0.98	Dnai2	PREDICTED: dynein intermediate chain 3, ciliary-like [Sinocyclocheilus rhinocerous]	-	-	-	-
UNIGENE0036240	9	0	0.15	-0.92	-2.41	-	PREDICTED: uncharacterized protein LOC107718596 isoform X1 [Sinocyclocheilus rhinocerous]	-	-	-	-
UNIGENE0036372	9	0	0.64	-1.31	-2.09	-	--	-	-	-	-
UNIGENE0036651	9	0	0.02	-0.3	-0.98	Ubxn11	PREDICTED: UBX domain-containing protein 11-like [Sinocyclocheilus rhinocerous]	-	-	-	-
UNIGENE0036669	9	0	0.14	-0.56	-1.04	nr2e1	nuclear receptor subfamily 2 group E member 1 [Danio rerio]	-	GO:0043227//membrane-bounded organelle;GO:0043226//organelle;GO:0044464//cell part;GO:0005623//cell;GO:0044424//intracellular part;GO:0005622//intracellular;GO:0043229//intracellular organelle;GO:0043231//intracellular membrane-bounded organelle	GO:0003677//DNA binding;GO:1901363//heterocyclic compound binding;GO:0060089//molecular transducer activity;GO:0004872//receptor activity;GO:0003676//nucleic acid binding;GO:0004871//signal transducer activity;GO:0043169//cation binding;GO:0038023//signaling receptor activity;GO:0046872//metal ion binding;GO:0097159//organic cyclic compound binding;GO:0043167//ion binding;GO:0005488//binding;GO:0…	GO:0065007//biological regulation;GO:1901576//organic substance biosynthetic process;GO:0071704//organic substance metabolic process;GO:0050789//regulation of biological process;GO:0018130//heterocycle biosynthetic process;GO:0007165//signal transduction;GO:0006351//transcription, DNA-templated;GO:0034645//cellular macromolecule biosynthetic process;GO:0010467//gene expression;GO:1901362//organic…
UNIGENE0036730	9	0	0.39	-0.88	-2.29	-	--	-	-	-	-
UNIGENE0037187	9	0	-0.12	-1.28	-2.17	-	--	-	-	-	-
UNIGENE0037188	9	0	-0.24	-0.86	-1.65	-	novel protein, partial [Danio rerio]	-	-	-	-
UNIGENE0037192	9	0	-0.03	-0.66	-1.07	AXDND1	PREDICTED: axonemal dynein light chain domain-containing protein 1-like [Sinocyclocheilus anshuiensis]	-	-	-	-
UNIGENE0037281	9	0	0.37	-0.61	-1.67	ALPK3	PREDICTED: alpha-protein kinase 3-like isoform X1 [Sinocyclocheilus rhinocerous]	-	-	GO:0036094//small molecule binding;GO:0016772//transferase activity, transferring phosphorus-containing groups;GO:0016740//transferase activity;GO:0001882//nucleoside binding;GO:0003824//catalytic activity;GO:0032549//ribonucleoside binding;GO:0032550//purine ribonucleoside binding;GO:0016773//phosphotransferase activity, alcohol group as acceptor;GO:0016301//kinase activity;GO:0004672//protein k…	GO:0044237//cellular metabolic process;GO:0043412//macromolecule modification;GO:0043170//macromolecule metabolic process;GO:0009987//cellular process;GO:0008152//metabolic process;GO:0044260//cellular macromolecule metabolic process;GO:0019538//protein metabolic process;GO:0044238//primary metabolic process;GO:0006464//cellular protein modification process;GO:0044267//cellular protein metabolic …
UNIGENE0037378	9	0	0.12	-0.62	-0.95	-	--	-	-	-	-
UNIGENE0037416	9	0	0.48	-0.92	-2.11	-	unnamed protein product [Oncorhynchus mykiss]	-	-	-	-
UNIGENE0037519	9	0	0.22	-0.59	-0.87	Prf1	perforin 2 [Carassius auratus langsdorfii]	-	-	-	-
UNIGENE0038127	9	0	0.17	-0.58	-0.94	plcd3a	PREDICTED: 1-phosphatidylinositol 4,5-bisphosphate phosphodiesterase delta-3-A-like [Sinocyclocheilus rhinocerous]	ko01100//Metabolic pathways//Global and Overview//Metabolism;ko04020//Calcium signaling pathway//Signal transduction//Environmental Information Processing;ko04070//Phosphatidylinositol signaling system//Signal transduction//Environmental Information Processing;ko00562//Inositol phosphate metabolism//Carbohydrate metabolism//Metabolism	-	GO:0060089//molecular transducer activity;GO:0016788//hydrolase activity, acting on ester bonds;GO:0042578//phosphoric ester hydrolase activity;GO:0004620//phospholipase activity;GO:0003824//catalytic activity;GO:0008081//phosphoric diester hydrolase activity;GO:0004629//phospholipase C activity;GO:0016298//lipase activity;GO:0016787//hydrolase activity	GO:0050794//regulation of cellular process;GO:0044700//single organism signaling;GO:0008152//metabolic process;GO:0065007//biological regulation;GO:0009653//anatomical structure morphogenesis;GO:0051716//cellular response to stimulus;GO:0007154//cell communication;GO:0050896//response to stimulus;GO:0044699//single-organism process;GO:0044763//single-organism cellular process;GO:0007165//signal t…
UNIGENE0038237	9	0	0.04	-0.63	-0.99	fos	PREDICTED: protein fosB-like [Sinocyclocheilus rhinocerous]	-	GO:0043229//intracellular organelle;GO:0043226//organelle;GO:0043231//intracellular membrane-bounded organelle;GO:0043227//membrane-bounded organelle;GO:0044464//cell part;GO:0005622//intracellular;GO:0044424//intracellular part;GO:0005623//cell	GO:0097159//organic cyclic compound binding;GO:1901363//heterocyclic compound binding;GO:0005488//binding;GO:0001071//nucleic acid binding transcription factor activity;GO:0003676//nucleic acid binding	GO:0034641//cellular nitrogen compound metabolic process;GO:0016070//RNA metabolic process;GO:0034654//nucleobase-containing compound biosynthetic process;GO:0010467//gene expression;GO:0090304//nucleic acid metabolic process;GO:0006139//nucleobase-containing compound metabolic process;GO:0009987//cellular process;GO:1901362//organic cyclic compound biosynthetic process;GO:0044238//primary metabo…
UNIGENE0038546	9	0	1	-1.41	-2.16	-	--	-	-	-	-
UNIGENE0038729	9	0	-0.22	-0.77	-2.02	-	PREDICTED: gastrula zinc finger protein XlCGF8.2DB-like [Sinocyclocheilus grahami]	-	-	-	-
UNIGENE0039018	9	0	0.38	-0.95	-1.42	-	--	-	-	-	-
UNIGENE0039019	9	0	0.26	-0.41	-0.84	-	PREDICTED: protein FAM170A-like [Sinocyclocheilus grahami]	-	-	-	-
UNIGENE0039535	9	0	0.35	-0.66	-1.23	-	--	-	-	-	-
UNIGENE0039587	9	0	0.31	-0.31	-0.72	Rsph4a	PREDICTED: radial spoke head protein 6 homolog A-like [Sinocyclocheilus grahami]	-	-	-	-
UNIGENE0039597	9	0	0.24	-0.51	-0.8	dzip1l	PREDICTED: LOW QUALITY PROTEIN: zinc finger protein DZIP1L-like [Cyprinus carpio]	-	-	-	-
UNIGENE0039644	9	0	0.3	-0.44	-0.82	-	hypothetical protein EH28_14246 [Larimichthys crocea]	-	-	-	-
UNIGENE0039741	9	0	0.21	-0.77	-1.51	-	--	-	-	-	-
UNIGENE0039752	9	0	0.26	-0.55	-1.19	ccdc89	PREDICTED: coiled-coil domain-containing protein 89 [Sinocyclocheilus anshuiensis]	-	GO:0043227//membrane-bounded organelle;GO:0043231//intracellular membrane-bounded organelle;GO:0005623//cell;GO:0044424//intracellular part;GO:0043229//intracellular organelle;GO:0044464//cell part;GO:0005622//intracellular;GO:0043226//organelle	-	-
UNIGENE0039912	9	0	0.44	-0.62	-0.98	-	PREDICTED: macrophage mannose receptor 1-like [Cyprinus carpio]	-	-	-	-
UNIGENE0040114	9	0	0.23	-0.56	-0.85	IQUB	PREDICTED: IQ and ubiquitin-like domain-containing protein [Sinocyclocheilus grahami]	-	-	-	-
UNIGENE0040203	9	0	0.28	-0.8	-2.43	-	--	-	-	-	-
UNIGENE0040853	9	0	0.19	-0.34	-1.16	ZNF345	PREDICTED: gastrula zinc finger protein XlCGF57.1-like [Sinocyclocheilus anshuiensis]	-	-	-	-
UNIGENE0041046	9	0	0.3	-0.34	-1.18	-	--	-	-	-	-
UNIGENE0041085	9	0	0.17	-0.32	-1.22	-	interferon-inducible protein Gig1 [Carassius auratus]	-	-	-	-
UNIGENE0041185	9	0	0.04	-0.34	-1.03	-	PREDICTED: probable G-protein coupled receptor 135 [Stegastes partitus]	-	-	-	-
UNIGENE0041197	9	0	0.16	-0.54	-1.1	OR2M5	PREDICTED: olfactory receptor 2M5-like [Cyprinus carpio]	-	GO:0044425//membrane part;GO:0016020//membrane;GO:0031224//intrinsic component of membrane	-	GO:0007165//signal transduction;GO:0044700//single organism signaling;GO:0050896//response to stimulus;GO:0050789//regulation of biological process;GO:0051716//cellular response to stimulus;GO:0007166//cell surface receptor signaling pathway;GO:0023052//signaling;GO:0009987//cellular process;GO:0044763//single-organism cellular process;GO:0050794//regulation of cellular process;GO:0007154//cell c…
UNIGENE0041556	9	0	0.46	-0.65	-1.2	-	--	-	-	-	-
UNIGENE0041708	9	0	0.24	-0.52	-0.99	-	--	-	-	-	-
UNIGENE0042146	9	0	-0.84	-2.23	-4.55	-	--	-	-	-	-
UNIGENE0042341	9	0	-0.16	-1.3	-2.04	INHBA	PREDICTED: inhibin beta A chain-like [Sinocyclocheilus grahami]	ko04060//Cytokine-cytokine receptor interaction//Signaling molecules and interaction//Environmental Information Processing;ko04350//TGF-beta signaling pathway//Signal transduction//Environmental Information Processing	-	-	GO:0031099//regeneration;GO:0044699//single-organism process;GO:0042246//tissue regeneration;GO:0032502//developmental process;GO:0009611//response to wounding;GO:0009888//tissue development;GO:0044767//single-organism developmental process;GO:0048856//anatomical structure development;GO:0040007//growth;GO:0050896//response to stimulus;GO:0042060//wound healing;GO:0048589//developmental growth;GO…
UNIGENE0042431	9	0	0.39	-0.64	-1.21	-	--	-	-	-	-
UNIGENE0042439	9	0	0.09	-0.48	-1.93	-	--	-	-	-	-
UNIGENE0042483	9	0	-0.06	-0.65	-1.02	Slc16a6	PREDICTED: monocarboxylate transporter 7-like [Sinocyclocheilus grahami]	-	-	-	-
UNIGENE0042622	9	0	0.19	-0.77	-1.7	-	--	-	-	-	-
UNIGENE0042653	9	0	0.44	-0.61	-1.35	NOXRED1	PREDICTED: NADP-dependent oxidoreductase domain-containing protein 1 isoform X1 [Danio rerio]	-	-	-	GO:0008152//metabolic process;GO:0044710//single-organism metabolic process;GO:0044699//single-organism process
UNIGENE0042736	9	0	0.26	-0.5	-0.74	DCUN1D5	PREDICTED: DCN1-like protein 5, partial [Sinocyclocheilus rhinocerous]	-	-	-	-
UNIGENE0042970	9	0	0.46	-0.5	-0.93	ZNF333	PREDICTED: gastrula zinc finger protein XlCGF8.2DB-like [Sinocyclocheilus rhinocerous]	-	-	-	-
UNIGENE0043006	9	0	-0.23	-0.52	-1.68	-	--	-	-	-	-
UNIGENE0043163	9	0	-0.18	-1.11	-2.22	-	--	-	-	-	-
UNIGENE0043358	9	0	0.64	-1.9	-7.29	-	--	-	-	-	-
UNIGENE0043657	9	0	0.31	-0.27	-0.91	Znf787	PREDICTED: gastrula zinc finger protein XlCGF57.1-like [Sinocyclocheilus rhinocerous]	-	-	-	-
UNIGENE0043688	9	0	0.33	-0.72	-1.47	-	--	-	-	-	-
UNIGENE0043769	9	0	0.11	-0.39	-1.05	-	--	-	-	-	-
UNIGENE0043874	9	0	0.22	-0.79	-1.53	-	--	-	-	-	-
UNIGENE0043887	9	0	0.01	-0.69	-1.51	-	--	-	-	-	-
UNIGENE0044664	9	0	0.13	-0.99	-1.59	-	--	-	-	-	-
UNIGENE0044798	9	0	0.35	-0.52	-0.79	rsph10b	PREDICTED: radial spoke head 10 homolog B-like isoform X1 [Cyprinus carpio]	-	-	-	-
UNIGENE0044802	9	0	0.3	-0.6	-1.04	-	--	-	-	-	-
UNIGENE0044949	9	0	0.42	-0.53	-2.33	-	--	-	-	-	-
UNIGENE0045164	9	0	0.75	-0.78	-2.95	-	--	-	-	-	-
UNIGENE0045205	9	0	-0.17	-0.66	-1.77	-	--	-	-	-	-
UNIGENE0045303	9	0	0.47	-0.66	-1.05	CNGA2	PREDICTED: cyclic nucleotide-gated cation channel subunit A-like isoform X1 [Cyprinus carpio]	-	-	-	-
UNIGENE0045384	9	0	0.28	-0.55	-0.89	AK9	PREDICTED: adenylate kinase 9 [Sinocyclocheilus anshuiensis]	ko01100//Metabolic pathways//Global and Overview//Metabolism;ko01110//Biosynthesis of secondary metabolites//Global and Overview//Metabolism;ko01130//Biosynthesis of antibiotics//Global and Overview//Metabolism;ko00230//Purine metabolism//Nucleotide metabolism//Metabolism;ko00240//Pyrimidine metabolism//Nucleotide metabolism//Metabolism	-	GO:0003824//catalytic activity	GO:0008152//metabolic process;GO:0044237//cellular metabolic process;GO:0009987//cellular process
UNIGENE0045636	9	0	0.27	-0.45	-0.97	-	--	-	-	-	-
UNIGENE0045950	9	0	0.42	-0.54	-1.48	-	--	-	-	-	-
UNIGENE0046109	9	0	0.19	-0.49	-0.85	-	--	-	-	-	-
UNIGENE0046175	9	0	0.54	-0.84	-1.85	-	--	-	-	-	-
UNIGENE0046367	9	0	0.23	-0.62	-0.9	-	--	-	-	-	-
UNIGENE0046479	9	0	0.01	-0.41	-1.07	-	--	-	-	-	-
UNIGENE0046507	9	0	0.3	-0.47	-0.91	-	--	-	-	-	-
UNIGENE0046512	9	0	0.14	-0.59	-0.9	-	--	-	-	-	-
UNIGENE0046649	9	0	-0.33	-1.16	-1.97	-	--	-	-	-	-
UNIGENE0046797	9	0	0.14	-2.63	-8.44	-	--	-	-	-	-
UNIGENE0047159	9	0	0.19	-0.51	-0.89	C22orf23	PREDICTED: UPF0193 protein EVG1 [Sinocyclocheilus grahami]	-	-	-	-
UNIGENE0047282	9	0	0.46	-0.73	-1.38	-	PREDICTED: uncharacterized protein LOC102081651 [Oreochromis niloticus]	-	-	-	-
UNIGENE0047340	9	0	0.16	-0.51	-0.89	-	--	-	-	-	-
UNIGENE0047474	9	0	0.24	-0.23	-0.78	-	--	-	-	-	-
UNIGENE0047615	9	0	0.26	-0.73	-2.06	-	--	-	-	-	-
UNIGENE0047756	9	0	0.25	-0.39	-0.8	spata18	PREDICTED: mitochondria-eating protein isoform X1 [Sinocyclocheilus anshuiensis]	-	GO:0043229//intracellular organelle;GO:0031975//envelope;GO:0005740//mitochondrial envelope;GO:0044444//cytoplasmic part;GO:0005622//intracellular;GO:0044424//intracellular part;GO:0044422//organelle part;GO:0031966//mitochondrial membrane;GO:0043231//intracellular membrane-bounded organelle;GO:0044446//intracellular organelle part;GO:0044464//cell part;GO:0043227//membrane-bounded organelle;GO:0…	-	GO:0044712//single-organism catabolic process;GO:0044710//single-organism metabolic process;GO:0007005//mitochondrion organization;GO:0022411//cellular component disassembly;GO:0006914//autophagy;GO:0008152//metabolic process;GO:0061726//mitochondrion disassembly;GO:0050896//response to stimulus;GO:0009987//cellular process;GO:0033554//cellular response to stress;GO:0009056//catabolic process;GO:…
UNIGENE0047965	9	0	0.01	-1.64	-2.77	-	--	-	-	-	-
UNIGENE0048091	9	0	0.3	-0.57	-1.54	-	--	-	-	-	-
UNIGENE0048282	9	0	0.34	-0.5	-0.99	-	--	-	-	-	-
UNIGENE0048542	9	0	0.32	-0.35	-0.72	-	PREDICTED: ankyrin repeat domain-containing protein 12-like [Cyprinus carpio]	ko01100//Metabolic pathways//Global and Overview//Metabolism;ko00512//Mucin type O-glycan biosynthesis//Glycan biosynthesis and metabolism//Metabolism	-	-	-
UNIGENE0048792	9	0	0.23	-0.71	-1.23	-	--	-	-	-	-
UNIGENE0049243	9	0	-0.64	-1.12	-3.17	-	--	-	-	-	-
UNIGENE0049281	9	0	0	-1.4	-2.79	-	--	-	-	-	-
UNIGENE0049431	9	0	0.16	-0.33	-1.01	-	--	-	-	-	-
UNIGENE0049441	9	0	-0.28	-1.65	-3.89	-	--	-	-	-	-
UNIGENE0049454	9	0	0.27	-0.77	-1.38	-	--	-	-	-	-
UNIGENE0049467	9	0	0.46	-2.29	-4.08	NLRC3	PREDICTED: protein NLRC3-like [Cyprinus carpio]	-	-	-	-
UNIGENE0049532	9	0	0.14	-0.47	-1.03	ZSCAN25	PREDICTED: gastrula zinc finger protein XlCGF49.1-like [Sinocyclocheilus rhinocerous]	-	-	GO:0043169//cation binding;GO:0005488//binding;GO:0097159//organic cyclic compound binding;GO:0043167//ion binding	-
UNIGENE0049685	9	0	0.22	-0.71	-1.12	CREM	PREDICTED: cAMP-responsive element modulator-like [Sinocyclocheilus rhinocerous]	ko04261//Adrenergic signaling in cardiomyocytes//Circulatory system//Organismal Systems	GO:0044424//intracellular part;GO:0044464//cell part;GO:0043231//intracellular membrane-bounded organelle;GO:0043229//intracellular organelle;GO:0043226//organelle;GO:0043227//membrane-bounded organelle;GO:0005623//cell;GO:0005622//intracellular	GO:0003677//DNA binding;GO:0003676//nucleic acid binding;GO:1901363//heterocyclic compound binding;GO:0005488//binding;GO:0097159//organic cyclic compound binding	GO:0044249//cellular biosynthetic process;GO:1901362//organic cyclic compound biosynthetic process;GO:0006351//transcription, DNA-templated;GO:0009987//cellular process;GO:0032774//RNA biosynthetic process;GO:0034654//nucleobase-containing compound biosynthetic process;GO:0006139//nucleobase-containing compound metabolic process;GO:0006725//cellular aromatic compound metabolic process;GO:1901360/…
UNIGENE0049835	9	0	0.35	-0.26	-1.36	-	--	-	-	-	-
UNIGENE0049880	9	0	0.37	-0.75	-1.26	-	PREDICTED: protein NLRC3-like [Oryzias latipes]	-	-	-	-
UNIGENE0049972	9	0	0.96	-0.94	-2.51	-	--	-	-	-	-
UNIGENE0050034	9	0	0.23	-1.43	-2.11	-	--	-	-	-	-
UNIGENE0050132	9	0	0.47	-0.55	-0.86	CCDC13	PREDICTED: coiled-coil domain-containing protein 13-like [Sinocyclocheilus rhinocerous]	-	-	-	-
UNIGENE0050241	9	0	0.63	-0.93	-1.54	-	--	-	-	-	-
UNIGENE0050594	9	0	-0.02	-0.36	-1.08	-	PREDICTED: zinc finger protein 184-like, partial [Cyprinus carpio]	-	-	-	-
UNIGENE0050675	9	0	0.14	-0.86	-1.3	-	--	-	-	-	-
UNIGENE0050739	9	0	0.67	-1.2	-1.85	-	--	-	-	-	-
UNIGENE0050803	9	0	0.31	-0.39	-1.14	ATP2A2	PREDICTED: sarcoplasmic/endoplasmic reticulum calcium ATPase 2-like [Cyprinus carpio]	ko04020//Calcium signaling pathway//Signal transduction//Environmental Information Processing	-	-	-
UNIGENE0050895	9	0	0.42	-0.57	-1.1	-	--	-	-	-	-
UNIGENE0050897	9	0	0.26	-0.58	-1.47	-	--	-	-	-	-
UNIGENE0050973	9	0	0.58	-0.81	-1.95	-	--	-	-	-	-
UNIGENE0050975	9	0	0.3	-0.79	-1.21	Ubn2	PREDICTED: ubinuclein-1-like [Sinocyclocheilus rhinocerous]	-	-	-	-
UNIGENE0051047	9	0	0.83	-0.92	-4.1	Cic	PREDICTED: protein capicua homolog isoform X4 [Cyprinus carpio]	-	-	-	-
UNIGENE0051107	9	0	0.51	-0.84	-1.26	UNC5D	PREDICTED: netrin receptor UNC5D-like isoform X1 [Sinocyclocheilus anshuiensis]	-	-	-	-
UNIGENE0051443	9	0	0.3	-0.47	-0.78	RGSL1	PREDICTED: regulator of G-protein signaling protein-like [Sinocyclocheilus anshuiensis]	-	-	-	-
UNIGENE0051875	9	0	0.36	-0.36	-1.56	-	--	-	-	-	-
UNIGENE0052571	9	0	0.35	-0.47	-1.01	-	--	-	-	-	-
UNIGENE0052629	9	0	0.07	-0.54	-1.27	-	PREDICTED: serine/threonine-protein kinase pim-2-like [Sinocyclocheilus rhinocerous]	-	-	-	-
UNIGENE0052633	9	0	-0.25	-1	-2.5	-	--	-	-	-	-
UNIGENE0052792	9	0	0.4	-0.61	-1.48	-	--	-	-	-	-
UNIGENE0053191	9	0	0.26	-0.35	-1.08	lgals3bpa	PREDICTED: galectin-3-binding protein A-like [Sinocyclocheilus rhinocerous]	-	GO:0031012//extracellular matrix	GO:0004872//receptor activity;GO:0060089//molecular transducer activity;GO:0038024//cargo receptor activity	GO:0022610//biological adhesion
UNIGENE0053200	9	0	0.18	-0.52	-1.29	-	--	-	-	-	-
UNIGENE0053355	9	0	-0.57	-2.03	-3.41	-	--	-	-	-	-
UNIGENE0053404	9	0	0.36	-0.85	-2.03	-	--	-	-	-	-
UNIGENE0053557	9	0	-0.46	-2.57	-4.8	-	PREDICTED: uncharacterized protein LOC109066904 isoform X2 [Cyprinus carpio]	-	-	-	-
UNIGENE0053744	9	0	0	-1.84	-2.98	-	--	-	-	-	-
UNIGENE0053827	9	0	0.29	-0.71	-1.1	-	--	-	-	-	-
UNIGENE0053832	9	0	0.43	-0.52	-0.87	ARFIP2	PREDICTED: arfaptin-2-like isoform X2 [Cyprinus carpio]	-	-	-	-
UNIGENE0054040	9	0	0.03	-1.15	-1.69	-	--	-	-	-	-
UNIGENE0054175	9	0	-0.26	-1.11	-2.16	-	--	-	-	-	-
UNIGENE0054331	9	0	0.21	-0.74	-1.61	-	--	-	-	-	-
UNIGENE0054441	9	0	0.31	-0.76	-1.39	-	--	-	-	-	-
UNIGENE0054464	9	0	-0.13	-2.06	-2.96	-	--	-	-	-	-
UNIGENE0054888	9	0	-0.3	-1.32	-2.21	-	--	-	-	-	-
UNIGENE0054890	9	0	-0.23	-1.62	-2.27	-	novel protein, partial [Danio rerio]	-	-	-	-
UNIGENE0054944	9	0	0.41	-0.49	-1	-	--	-	-	-	-
UNIGENE0055067	9	0	-0.24	-0.65	-1.31	-	PREDICTED: sialoadhesin-like [Sinocyclocheilus anshuiensis]	-	-	-	-
UNIGENE0055222	9	0	0.17	-0.57	-1.67	-	--	-	-	-	-
UNIGENE0055381	9	0	0.34	-0.63	-1.44	MYH6	myosin heavy chain embryonic type 3 [Cyprinus carpio]	ko04261//Adrenergic signaling in cardiomyocytes//Circulatory system//Organismal Systems;ko04530//Tight junction//Cellular commiunity//Cellular Processes;ko04260//Cardiac muscle contraction//Circulatory system//Organismal Systems	-	GO:0005488//binding	GO:0003012//muscle system process;GO:0044707//single-multicellular organism process;GO:0009653//anatomical structure morphogenesis;GO:0003008//system process;GO:0044767//single-organism developmental process;GO:0048856//anatomical structure development;GO:0003010//voluntary skeletal muscle contraction;GO:0044085//cellular component biogenesis;GO:0071840//cellular component organization or biogene…
UNIGENE0055423	9	0	0.35	-0.29	-1.08	-	--	-	-	-	-
UNIGENE0055490	9	0	0.28	-0.61	-2.08	-	--	-	-	-	-
UNIGENE0055572	9	0	1.07	-0.76	-3.46	-	--	-	-	-	-
UNIGENE0055613	9	0	0.2	-0.76	-2.04	ATP8B4	PREDICTED: phospholipid-transporting ATPase ID-like [Sinocyclocheilus grahami]	-	GO:0044425//membrane part;GO:0031224//intrinsic component of membrane;GO:0016020//membrane	GO:0097159//organic cyclic compound binding;GO:0032549//ribonucleoside binding;GO:1901363//heterocyclic compound binding;GO:0001883//purine nucleoside binding;GO:0032550//purine ribonucleoside binding;GO:0008324//cation transmembrane transporter activity;GO:0015075//ion transmembrane transporter activity;GO:0003824//catalytic activity;GO:0022892//substrate-specific transporter activity;GO:0043169…	GO:0010876//lipid localization;GO:0033036//macromolecule localization;GO:0015748//organophosphate ester transport;GO:0006869//lipid transport;GO:0071702//organic substance transport;GO:1902578//single-organism localization;GO:0015914//phospholipid transport;GO:0044699//single-organism process;GO:0044765//single-organism transport;GO:0015711//organic anion transport;GO:0006810//transport;GO:005123…
UNIGENE0055676	9	0	-0.19	-0.69	-1.69	-	--	-	-	-	-
UNIGENE0055791	9	0	-0.17	-0.94	-2.01	-	--	-	-	-	-
UNIGENE0056111	9	0	0.53	-0.59	-0.99	-	--	-	-	-	-
UNIGENE0056207	9	0	1.66	-1.44	-7.69	MYH4	Myosin heavy chain 1 [Dicentrarchus labrax]	ko04261//Adrenergic signaling in cardiomyocytes//Circulatory system//Organismal Systems;ko04530//Tight junction//Cellular commiunity//Cellular Processes;ko04260//Cardiac muscle contraction//Circulatory system//Organismal Systems	GO:0043226//organelle;GO:0044424//intracellular part;GO:0005623//cell;GO:0005622//intracellular;GO:0005856//cytoskeleton;GO:0043232//intracellular non-membrane-bounded organelle;GO:0044464//cell part;GO:0015629//actin cytoskeleton;GO:0043229//intracellular organelle;GO:0043228//non-membrane-bounded organelle	GO:1901363//heterocyclic compound binding;GO:0017111//nucleoside-triphosphatase activity;GO:0005488//binding;GO:0001882//nucleoside binding;GO:0008092//cytoskeletal protein binding;GO:0003824//catalytic activity;GO:0032549//ribonucleoside binding;GO:0016462//pyrophosphatase activity;GO:0097159//organic cyclic compound binding;GO:0016818//hydrolase activity, acting on acid anhydrides, in phosphoru…	GO:0048856//anatomical structure development;GO:0050879//multicellular organismal movement;GO:0014721//twitch skeletal muscle contraction;GO:0003008//system process;GO:0009653//anatomical structure morphogenesis;GO:0032989//cellular component morphogenesis;GO:0044767//single-organism developmental process;GO:0016043//cellular component organization;GO:0003009//skeletal muscle contraction;GO:00718…
UNIGENE0056254	9	0	-0.02	-0.43	-1.42	-	PREDICTED: 2-oxoglutarate dehydrogenase, mitochondrial-like isoform X2 [Scleropages formosus]	ko01100//Metabolic pathways//Global and Overview//Metabolism;ko01110//Biosynthesis of secondary metabolites//Global and Overview//Metabolism;ko01130//Biosynthesis of antibiotics//Global and Overview//Metabolism;ko01120//Microbial metabolism in diverse environments//Global and Overview//Metabolism;ko01200//Carbon metabolism//Global and Overview//Metabolism;ko00310//Lysine degradation//Amino acid m…	-	-	-
UNIGENE0056330	9	0	0.29	-0.28	-0.82	-	PREDICTED: RNA-directed DNA polymerase from mobile element jockey-like, partial [Larimichthys crocea]	-	-	-	-
UNIGENE0056441	9	0	1.09	-1.76	-3.07	-	PREDICTED: melanopsin-like [Sinocyclocheilus anshuiensis]	-	-	-	-
UNIGENE0056745	9	0	0.31	-0.45	-1.26	-	PREDICTED: immunoglobulin iota chain-like, partial [Sinocyclocheilus grahami]	-	-	-	-
UNIGENE0056871	9	0	0.41	-0.45	-0.85	-	--	-	-	-	-
UNIGENE0057067	9	0	0.41	-0.54	-1	-	PREDICTED: uncharacterized protein LOC107683895 [Sinocyclocheilus anshuiensis]	-	-	-	GO:0050789//regulation of biological process;GO:0048518//positive regulation of biological process;GO:0006952//defense response;GO:0044700//single organism signaling;GO:0031347//regulation of defense response;GO:0002376//immune system process;GO:0006955//immune response;GO:0051716//cellular response to stimulus;GO:0044699//single-organism process;GO:0006950//response to stress;GO:0009987//cellula…
UNIGENE0057101	9	0	0.17	-0.67	-1.24	-	Transposable element Tcb1 transposase [Salmo salar]	ko04510//Focal adhesion//Cellular commiunity//Cellular Processes;ko04810//Regulation of actin cytoskeleton//Cell motility//Cellular Processes;ko04270//Vascular smooth muscle contraction//Circulatory system//Organismal Systems	-	-	-
UNIGENE0057138	9	0	-0.53	-1.62	-3.32	-	--	-	-	-	-
UNIGENE0057223	9	0	0.03	-0.65	-2.09	-	--	-	-	-	-
UNIGENE0057310	9	0	0.35	-0.27	-1.09	-	PREDICTED: uncharacterized protein LOC107753517 [Sinocyclocheilus rhinocerous]	-	-	-	-
UNIGENE0057467	9	0	0.31	-1.35	-2.19	-	PREDICTED: G2/M phase-specific E3 ubiquitin-protein ligase-like isoform X2 [Oreochromis niloticus]	-	-	-	-
UNIGENE0057508	9	0	0.26	-0.9	-1.76	-	--	-	-	-	-
UNIGENE0057708	9	0	0.5	-0.67	-1.23	-	--	-	-	-	-
UNIGENE0057796	9	0	0.5	-0.47	-1.31	-	--	-	-	-	-
UNIGENE0057814	9	0	-0.06	-0.93	-2.24	-	--	-	-	-	-
UNIGENE0058028	9	0	-0.42	-1.27	-2.43	-	--	-	-	-	-
UNIGENE0058042	9	0	0.46	-0.52	-0.99	-	--	-	-	-	-
UNIGENE0058077	9	0	0.61	-0.85	-1.42	-	--	-	-	-	-
UNIGENE0058199	9	0	-0.14	-0.68	-1.34	-	uncharacterized protein LOC793802 [Danio rerio]	-	-	-	-
UNIGENE0058208	9	0	-0.42	-1.51	-2.89	-	--	-	-	-	-
UNIGENE0058303	9	0	0.29	-0.86	-1.63	-	--	-	-	-	-
UNIGENE0058305	9	0	0.2	-0.53	-0.91	-	PREDICTED: dCTP pyrophosphatase 1 [Gekko japonicus]	-	-	-	-
UNIGENE0058376	9	0	0.37	-0.39	-1.28	-	--	-	-	-	-
UNIGENE0058411	9	0	-0.08	-1.52	-2.21	-	--	-	-	-	-
UNIGENE0058436	9	0	0.45	-0.65	-1.19	-	--	-	-	-	-
UNIGENE0058449	9	0	0.33	-0.43	-0.83	Tti1	PREDICTED: TELO2-interacting protein 1 homolog isoform X3 [Pygocentrus nattereri]	-	-	-	-
UNIGENE0058504	9	0	0.34	-0.41	-0.98	Tf2-11	Retrovirus-related Pol polyprotein from transposon 17.6 [Salmo salar]	-	-	-	-
UNIGENE0058518	9	0	0.92	-0.96	-3.12	VMO1	PREDICTED: vitelline membrane outer layer protein 1 homolog [Sinocyclocheilus rhinocerous]	-	-	-	-
UNIGENE0058646	9	0	-0.34	-0.93	-2.14	-	--	-	-	-	-
UNIGENE0058688	9	0	-0.44	-1.14	-2.86	-	--	-	-	-	-
UNIGENE0058746	9	0	0.13	-0.25	-0.96	GORASP1	PREDICTED: Golgi reassembly-stacking protein 1 [Sinocyclocheilus anshuiensis]	-	-	-	-
UNIGENE0058872	9	0	0.17	-0.58	-0.88	PPIL6	PREDICTED: peptidyl-prolyl cis-trans isomerase-like 6 [Sinocyclocheilus rhinocerous]	-	-	GO:0003824//catalytic activity;GO:0016853//isomerase activity;GO:0016859//cis-trans isomerase activity	GO:0044260//cellular macromolecule metabolic process;GO:0044267//cellular protein metabolic process;GO:0044238//primary metabolic process;GO:0019538//protein metabolic process;GO:0071704//organic substance metabolic process;GO:0044237//cellular metabolic process;GO:0043170//macromolecule metabolic process;GO:0009987//cellular process;GO:0008152//metabolic process
UNIGENE0058875	9	0	-0.06	-1.05	-1.95	Helz2	PREDICTED: helicase with zinc finger domain 2 [Sinocyclocheilus anshuiensis]	-	-	-	-
UNIGENE0059032	9	0	0.18	-0.41	-0.91	zgc:110373	PREDICTED: cilia- and flagella-associated protein 161-like [Sinocyclocheilus rhinocerous]	-	-	-	GO:0044763//single-organism cellular process;GO:0016043//cellular component organization;GO:0032990//cell part morphogenesis;GO:0048858//cell projection morphogenesis;GO:0032502//developmental process;GO:0009987//cellular process;GO:0032989//cellular component morphogenesis;GO:0000902//cell morphogenesis;GO:0048869//cellular developmental process;GO:0044699//single-organism process;GO:0009653//an…
UNIGENE0059057	9	0	0.22	-0.61	-1.96	-	hypothetical protein cypCar_00046407 [Cyprinus carpio]	-	-	-	-
UNIGENE0059066	9	0	0.24	-0.54	-1.09	-	--	-	-	-	-
UNIGENE0059081	9	0	-0.21	-1.28	-3.7	-	--	-	-	-	-
UNIGENE0059187	9	0	0.37	-0.32	-1.41	-	--	-	-	-	-
UNIGENE0059212	9	0	-0.01	-0.6	-2.02	-	PREDICTED: uncharacterized protein K02A2.6-like [Cyprinus carpio]	-	-	-	-
UNIGENE0059241	9	0	0.44	-0.96	-1.8	-	--	-	-	-	-
UNIGENE0059272	9	0	0.14	-0.79	-1.93	-	--	-	-	-	-
UNIGENE0059355	9	0	0.56	-0.96	-1.87	-	--	-	-	-	-
UNIGENE0059455	9	0	0.19	-0.55	-1.71	-	--	-	-	-	-
UNIGENE0059472	9	0	0.46	-0.83	-1.28	-	--	-	-	-	-
UNIGENE0059701	9	0	-0.23	-0.74	-1.65	-	--	-	-	-	-
UNIGENE0059753	9	0	-0.55	-1.57	-2.97	-	--	-	-	-	-
UNIGENE0059769	9	0	0.45	-0.59	-2	-	PREDICTED: serine/threonine-protein kinase pim-2-like [Cyprinus carpio]	-	-	-	-
UNIGENE0060043	9	0	0.16	-0.78	-1.26	-	--	-	-	-	-
UNIGENE0060135	9	0	-0.11	-1.49	-2.22	-	--	-	-	-	-
UNIGENE0060233	9	0	0.65	-0.7	-1.46	-	--	-	-	-	-
UNIGENE0060558	9	0	0.15	-0.6	-2.36	-	--	-	-	-	-
UNIGENE0060573	9	0	0.34	-0.81	-1.56	-	--	-	-	-	-
UNIGENE0060903	9	0	0.52	-0.93	-2.59	-	--	-	-	-	-
UNIGENE0060922	9	0	-0.2	-1.19	-1.91	-	--	-	-	-	-
UNIGENE0061034	9	0	-0.05	-1.18	-2.32	-	--	-	-	-	-
UNIGENE0061063	9	0	0.07	-0.74	-1.95	-	--	-	-	-	-
UNIGENE0061172	9	0	0.97	-2.54	-3.73	-	--	-	-	-	-
UNIGENE0061217	9	0	-0.65	-1.16	-3.05	-	PREDICTED: epiplakin, partial [Pelodiscus sinensis]	-	-	-	-
UNIGENE0061383	9	0	-0.03	-0.76	-2.32	-	--	-	-	-	-
UNIGENE0061397	9	0	-0.45	-1.87	-3.09	-	--	-	-	-	-
UNIGENE0061430	9	0	0.06	-1.15	-3.47	-	--	-	-	-	-
UNIGENE0061575	9	0	-0.28	-1.15	-2.5	-	--	-	-	-	-
UNIGENE0061638	9	0	0.3	-0.82	-1.66	-	--	-	-	-	-
UNIGENE0061728	9	0	0.46	-0.63	-1.33	VSTM2L	PREDICTED: V-set and transmembrane domain-containing protein 2-like protein [Sinocyclocheilus anshuiensis]	-	-	-	-
UNIGENE0061958	9	0	0.67	-0.74	-1.54	-	--	-	-	-	-
UNIGENE0061974	9	0	0.58	-0.6	-1.67	-	--	-	-	-	-
UNIGENE0062303	9	0	0.35	-0.93	-1.56	-	--	-	-	-	-
UNIGENE0062334	9	0	0.2	-0.59	-1.9	-	--	-	-	-	-
UNIGENE0062375	9	0	0.64	-0.74	-2.13	-	--	-	-	-	-
UNIGENE0062380	9	0	-0.42	-1.12	-2.68	-	--	-	-	-	-
UNIGENE0062415	9	0	-0.29	-1.15	-2.78	-	--	-	-	-	-
UNIGENE0062631	9	0	-0.05	-1.04	-1.63	-	--	-	-	-	-
UNIGENE0062674	9	0	0.8	-1.07	-2.25	-	--	-	-	-	-
UNIGENE0063038	9	0	-0.88	-2.94	-9.11	-	--	-	-	-	-
UNIGENE0063179	9	0	2.21	-1.41	-8.19	-	--	-	-	-	-
UNIGENE0063360	9	0	-0.25	-1.16	-2.45	-	--	-	-	-	-
UNIGENE0063407	9	0	-0.48	-1.92	-4.95	-	PREDICTED: glutamate receptor ionotropic, delta-2-like [Cyprinus carpio]	-	-	-	-
UNIGENE0063449	9	0	-0.32	-2.22	-4.99	-	--	-	-	-	-
UNIGENE0063481	9	0	0.41	-0.48	-0.95	AIP	PREDICTED: aryl-hydrocarbon-interacting protein-like 1 isoform X2 [Sinocyclocheilus rhinocerous]	-	-	-	-
UNIGENE0063488	9	0	0.82	-0.97	-3.77	-	PREDICTED: zinc finger BED domain-containing protein 1-like isoform X1 [Esox lucius]	-	-	-	-
UNIGENE0063548	9	0	0.17	-0.85	-1.99	-	--	-	-	-	-
UNIGENE0063627	9	0	-1.1	-3.1	-9.72	-	--	-	-	-	-
UNIGENE0063663	9	0	0.1	-0.64	-1.26	-	--	-	-	-	-
UNIGENE0063836	9	0	0.43	-0.75	-2.34	-	--	-	-	-	-
UNIGENE0063896	9	0	0.46	-0.38	-1.71	-	--	-	-	-	-
UNIGENE0063983	9	0	-0.12	-1.24	-1.71	-	--	-	-	-	-
UNIGENE0064192	9	0	0.05	-0.89	-3.12	-	--	-	-	-	-
UNIGENE0064260	9	0	0.38	-0.66	-1.63	-	--	-	-	-	-
UNIGENE0064733	9	0	0.62	-2.26	-4.11	-	--	-	-	-	-
UNIGENE0064878	9	0	0.24	-1.38	-2.51	-	--	-	-	-	-
UNIGENE0065094	9	0	0.02	-1.66	-2.58	-	PREDICTED: uncharacterized protein LOC102799956 [Neolamprologus brichardi]	-	-	-	-
UNIGENE0065492	9	0	0.23	-0.73	-1.89	-	--	-	-	-	-
UNIGENE0065570	9	0	-0.19	-0.47	-1.01	-	--	-	-	-	-
UNIGENE0065786	9	0	0.32	-1.03	-1.74	-	--	-	-	-	-
UNIGENE0065929	9	0	0.13	-0.57	-1.18	-	--	-	-	-	-
UNIGENE0066105	9	0	-0.25	-1.8	-2.74	-	--	-	-	-	-
UNIGENE0066140	9	0	0.06	-0.62	-2.08	-	--	-	-	-	-
UNIGENE0066268	9	0	0.19	-0.33	-0.95	-	--	-	-	-	-
UNIGENE0066788	9	0	0.46	-2.05	-3.15	-	--	-	-	-	-
UNIGENE0067067	9	0	0.19	-0.6	-1.17	-	--	-	-	-	-
UNIGENE0067346	9	0	0.85	-1.02	-2.92	-	--	-	-	-	-
UNIGENE0067454	9	0	-0.12	-0.97	-1.71	-	--	-	-	-	-
UNIGENE0067568	9	0	0.69	-0.67	-2.34	-	--	-	-	-	-
UNIGENE0067624	9	0	0.69	-0.99	-1.75	-	--	-	-	-	-
UNIGENE0067731	9	0	0.17	-0.41	-1.15	-	--	-	-	-	-
UNIGENE0067732	9	0	0.02	-1.62	-4.34	-	--	-	-	-	-
UNIGENE0068241	9	0	0.2	-0.96	-2.38	-	--	-	-	-	-
UNIGENE0068242	9	0	0.27	-1.15	-1.82	-	--	-	-	-	-
UNIGENE0068248	9	0	0.24	-0.63	-1.37	-	--	-	-	-	-
UNIGENE0068295	9	0	-0.46	-1.35	-4.32	-	--	-	-	-	-
UNIGENE0068524	9	0	0.84	-0.7	-3.19	-	--	-	-	-	-
UNIGENE0068528	9	0	-0.71	-1.49	-4.26	-	--	-	-	-	-
UNIGENE0068729	9	0	0.44	-0.78	-2.8	-	--	-	-	-	-
UNIGENE0069021	9	0	-0.68	-1.85	-3.71	-	--	-	-	-	-
UNIGENE0069167	9	0	0.35	-0.64	-1.24	-	--	-	-	-	-
UNIGENE0069190	9	0	0.14	-1.37	-2.72	six1b	PREDICTED: homeobox protein six1a [Sinocyclocheilus anshuiensis]	-	GO:0043231//intracellular membrane-bounded organelle;GO:0044424//intracellular part;GO:0005622//intracellular;GO:0044464//cell part;GO:0043227//membrane-bounded organelle;GO:0043229//intracellular organelle;GO:0005623//cell;GO:0043226//organelle	GO:0097159//organic cyclic compound binding;GO:0005488//binding;GO:0003676//nucleic acid binding;GO:0003677//DNA binding;GO:0001071//nucleic acid binding transcription factor activity;GO:1901363//heterocyclic compound binding	GO:0046483//heterocycle metabolic process;GO:0019438//aromatic compound biosynthetic process;GO:0007519//skeletal muscle tissue development;GO:0044249//cellular biosynthetic process;GO:0006725//cellular aromatic compound metabolic process;GO:0018130//heterocycle biosynthetic process;GO:0034645//cellular macromolecule biosynthetic process;GO:0014706//striated muscle tissue development;GO:0014855//…
UNIGENE0069318	9	0	0.03	-0.57	-2.2	-	--	-	-	-	-
UNIGENE0069327	9	0	0.34	-0.93	-2.2	-	--	-	-	-	-
UNIGENE0069381	9	0	0.24	-1.15	-1.9	-	--	-	-	-	-
UNIGENE0069481	9	0	0.04	-2.65	-9.25	-	--	-	-	-	-
UNIGENE0070387	9	0	0.72	-0.87	-2.08	-	--	-	-	-	-
UNIGENE0070402	9	0	-0.11	-0.9	-1.51	-	--	-	-	-	-
UNIGENE0070608	9	0	-0.07	-0.94	-2.18	-	--	-	-	-	-
UNIGENE0070739	9	0	0.35	-0.99	-2.25	-	--	-	-	-	-
UNIGENE0070840	9	0	0.44	-0.6	-1.05	-	--	-	-	-	-
UNIGENE0071044	9	0	0.51	-1.1	-2.49	-	--	-	-	-	-
UNIGENE0071176	9	0	0.37	-0.98	-1.46	-	--	-	-	-	-
UNIGENE0071189	9	0	0.19	-0.96	-1.68	-	--	-	-	-	-
UNIGENE0071237	9	0	-0.11	-1.55	-2.47	-	--	-	-	-	-
UNIGENE0071414	9	0	0.15	-1.14	-1.99	-	--	-	-	-	-
UNIGENE0071452	9	0	0.03	-0.86	-3.3	-	PREDICTED: uncharacterized protein LOC109098126 [Cyprinus carpio]	-	-	-	-
UNIGENE0071705	9	0	0.97	-1.05	-2.09	-	--	-	-	-	-
UNIGENE0071837	9	0	-0.15	-1.46	-2.56	-	PREDICTED: solute carrier family 2, facilitated glucose transporter member 11-like [Pundamilia nyererei]	-	-	-	-
UNIGENE0071903	9	0	-0.03	-0.83	-2.11	-	--	-	-	-	-
UNIGENE0072040	9	0	0.14	-0.34	-1.29	-	--	-	-	-	-
UNIGENE0072438	9	0	-1.1	-4.99	-9.93	-	--	-	-	-	-
UNIGENE0072541	9	0	0.42	-0.47	-1.26	-	--	-	-	-	-
UNIGENE0072683	9	0	0.02	-0.86	-1.71	-	--	-	-	-	-
UNIGENE0072885	9	0	0.12	-1.35	-2.01	-	--	-	-	-	-
UNIGENE0073057	9	0	0.62	-0.76	-1.86	Pol	Dystrobrevin alpha [Larimichthys crocea]	-	-	-	-
UNIGENE0073083	9	0	-0.25	-1.09	-1.94	-	--	-	-	-	-
UNIGENE0073131	9	0	0.69	-0.68	-2.22	eng2a	PREDICTED: homeobox protein engrailed-2a isoform X2 [Sinocyclocheilus anshuiensis]	-	GO:0043229//intracellular organelle;GO:0043227//membrane-bounded organelle;GO:0005622//intracellular;GO:0043231//intracellular membrane-bounded organelle;GO:0044464//cell part;GO:0044424//intracellular part;GO:0043226//organelle;GO:0005623//cell	GO:0003677//DNA binding;GO:0097159//organic cyclic compound binding;GO:0044212//transcription regulatory region DNA binding;GO:0001071//nucleic acid binding transcription factor activity;GO:0001067//regulatory region nucleic acid binding;GO:0000975//regulatory region DNA binding;GO:0005488//binding;GO:0003676//nucleic acid binding;GO:1901363//heterocyclic compound binding	GO:0048513//animal organ development;GO:0048869//cellular developmental process;GO:1901362//organic cyclic compound biosynthetic process;GO:1901360//organic cyclic compound metabolic process;GO:0044237//cellular metabolic process;GO:0009952//anterior/posterior pattern specification;GO:0043170//macromolecule metabolic process;GO:0048731//system development;GO:0006725//cellular aromatic compound me…
UNIGENE0000093	10	0	-0.15	-1.41	-0.75	-	--	-	-	-	-
UNIGENE0000113	10	0	-0.04	-1.71	-1.07	-	--	-	-	-	-
UNIGENE0000141	10	0	0.3	-0.63	-0.91	Sertad4	PREDICTED: SERTA domain-containing protein 4-like [Mesocricetus auratus]	-	-	-	-
UNIGENE0000180	10	0	0.24	-1.38	-0.87	-	--	-	-	-	-
UNIGENE0000310	10	0	0.52	-3.31	-1.54	-	Retrovirus-related Pol polyprotein LINE-1 [Larimichthys crocea]	-	-	-	-
UNIGENE0000514	10	0	0.79	-1.15	-0.85	-	--	-	-	-	-
UNIGENE0000521	10	0	0.51	-0.84	-0.9	-	--	-	-	-	-
UNIGENE0000531	10	0	0.37	-0.8	-0.81	-	--	-	-	-	-
UNIGENE0000599	10	0	0.07	-1.19	-0.7	-	PREDICTED: serine/arginine repetitive matrix protein 2-like isoform X1 [Hippocampus comes]	-	-	-	-
UNIGENE0000638	10	0	0.88	-1.1	-0.62	prmt8b	PREDICTED: ras and EF-hand domain-containing protein homolog [Sinocyclocheilus anshuiensis]	-	GO:0044464//cell part;GO:0016020//membrane;GO:0005622//intracellular;GO:0044424//intracellular part;GO:0005623//cell	GO:0016741//transferase activity, transferring one-carbon groups;GO:0003824//catalytic activity;GO:0016273//arginine N-methyltransferase activity;GO:0016274//protein-arginine N-methyltransferase activity;GO:0008168//methyltransferase activity;GO:0016740//transferase activity;GO:0008276//protein methyltransferase activity;GO:0008757//S-adenosylmethionine-dependent methyltransferase activity;GO:000…	GO:0036211//protein modification process;GO:0044699//single-organism process;GO:0035247//peptidyl-arginine omega-N-methylation;GO:0030182//neuron differentiation;GO:0044237//cellular metabolic process;GO:0048699//generation of neurons;GO:0022008//neurogenesis;GO:0019538//protein metabolic process;GO:0048731//system development;GO:0043414//macromolecule methylation;GO:0032501//multicellular organi…
UNIGENE0000682	10	0	0.44	-1.15	-0.99	-	--	-	-	-	-
UNIGENE0000693	10	0	0.62	-0.85	-0.37	-	PREDICTED: putative nuclease HARBI1 [Cyprinus carpio]	-	-	-	-
UNIGENE0000705	10	0	0.36	-0.81	-0.97	efhc2	PREDICTED: EF-hand domain-containing family member C2-like isoform X1 [Sinocyclocheilus rhinocerous]	-	-	GO:0046872//metal ion binding;GO:0005488//binding;GO:0043169//cation binding;GO:0043167//ion binding	-
UNIGENE0000771	10	0	-0.06	-2.38	-2.24	-	--	-	-	-	-
UNIGENE0000824	10	0	0.3	-0.84	-0.4	Trim35	PREDICTED: tripartite motif-containing protein 35-like isoform X1 [Sinocyclocheilus anshuiensis]	-	-	-	-
UNIGENE0000837	10	0	0.04	-1.73	-1.97	-	--	-	-	-	-
UNIGENE0000842	10	0	0.59	-1	-0.69	-	--	-	-	-	-
UNIGENE0000861	10	0	0.13	-1.85	-1.44	-	--	-	-	-	-
UNIGENE0000867	10	0	0.37	-1.37	-0.82	-	--	-	-	-	-
UNIGENE0000927	10	0	0.62	-0.77	-1.01	-	--	-	-	-	-
UNIGENE0001051	10	0	0.91	-1.16	-1.34	-	--	-	-	-	-
UNIGENE0001117	10	0	0.37	-1	-0.89	SLC24A4	PREDICTED: sodium/potassium/calcium exchanger 4-like isoform X3 [Sinocyclocheilus anshuiensis]	-	GO:0016020//membrane;GO:0044425//membrane part;GO:0031224//intrinsic component of membrane	-	GO:0009987//cellular process;GO:0044763//single-organism cellular process;GO:0044699//single-organism process
UNIGENE0001148	10	0	0.09	-1.11	-1.31	Pol	pol-like protein [Danio rerio]	-	-	-	-
UNIGENE0001149	10	0	0.44	-1.58	-1.59	-	--	-	-	-	-
UNIGENE0001213	10	0	0.11	-0.89	-1.19	-	--	-	-	-	-
UNIGENE0001283	10	0	0.04	-0.98	-1.32	-	--	-	-	-	-
UNIGENE0001363	10	0	0.29	-0.77	-0.62	-	--	-	-	-	-
UNIGENE0001474	10	0	0.34	-0.83	-0.92	-	--	-	-	-	-
UNIGENE0001579	10	0	0.03	-1.26	-1.6	-	--	-	-	-	-
UNIGENE0001664	10	0	0.31	-0.86	-0.89	-	--	-	-	-	-
UNIGENE0001739	10	0	0.43	-0.59	-0.88	-	--	-	-	-	-
UNIGENE0001810	10	0	0.35	-0.69	-0.31	-	--	-	-	-	-
UNIGENE0001939	10	0	-0.09	-1.12	-1.37	-	PREDICTED: zinc finger BED domain-containing protein 1-like [Sinocyclocheilus anshuiensis]	-	-	-	-
UNIGENE0002054	10	0	0.43	-0.75	-0.85	ZNF679	PREDICTED: gastrula zinc finger protein XlCGF8.2DB-like [Sinocyclocheilus grahami]	-	-	-	-
UNIGENE0002173	10	0	0.25	-0.76	-0.78	-	PREDICTED: NFAT activation molecule 1 [Sinocyclocheilus anshuiensis]	-	-	-	-
UNIGENE0002195	10	0	0.48	-0.77	-0.24	-	--	-	-	-	-
UNIGENE0002222	10	0	0.16	-1	-1.11	-	PREDICTED: zinc finger protein 2-like isoform X1 [Sinocyclocheilus anshuiensis]	-	-	-	-
UNIGENE0002232	10	0	0.38	-0.58	-0.73	-	--	-	-	-	-
UNIGENE0002282	10	0	0.36	-0.83	-0.93	-	--	-	-	-	-
UNIGENE0002334	10	0	0.79	-1.21	-0.44	-	--	-	-	-	-
UNIGENE0002386	10	0	0.46	-0.58	-0.63	-	--	-	-	-	-
UNIGENE0002418	10	0	0.25	-0.83	-0.6	-	--	-	-	-	-
UNIGENE0002500	10	0	0.14	-1.07	-0.69	-	--	-	-	-	-
UNIGENE0002502	10	0	0.4	-0.77	-0.84	-	--	-	-	-	-
UNIGENE0002503	10	0	1.3	-1.89	-0.78	-	--	-	-	-	-
UNIGENE0002794	10	0	0.82	-0.83	-1.01	-	--	-	-	-	-
UNIGENE0002872	10	0	0.63	-0.99	-0.29	-	--	-	-	-	-
UNIGENE0002899	10	0	0.42	-1.22	-1.02	-	--	-	-	-	-
UNIGENE0002909	10	0	0.4	-1.27	-0.56	-	--	-	-	-	-
UNIGENE0002934	10	0	0.29	-0.68	-0.96	draxin	PREDICTED: draxin-like isoform X1 [Sinocyclocheilus grahami]	-	-	-	GO:0000902//cell morphogenesis;GO:0032501//multicellular organismal process;GO:0048812//neuron projection morphogenesis;GO:0050794//regulation of cellular process;GO:0032990//cell part morphogenesis;GO:0048583//regulation of response to stimulus;GO:0007275//multicellular organism development;GO:0048699//generation of neurons;GO:0065007//biological regulation;GO:0048856//anatomical structure devel…
UNIGENE0002943	10	0	0.14	-0.95	-0.91	ccdc103	PREDICTED: Ig-like V-type domain-containing protein FAM187A [Sinocyclocheilus anshuiensis]	-	-	-	-
UNIGENE0002949	10	0	0.34	-0.72	-0.52	-	--	-	-	-	-
UNIGENE0002952	10	0	0.24	-0.75	-0.84	Mapk15	PREDICTED: LOW QUALITY PROTEIN: extracellular signal-regulated kinase 2-like [Cyprinus carpio]	-	-	GO:1901363//heterocyclic compound binding;GO:0005488//binding;GO:0004674//protein serine/threonine kinase activity;GO:0032550//purine ribonucleoside binding;GO:0016773//phosphotransferase activity, alcohol group as acceptor;GO:0001882//nucleoside binding;GO:0003824//catalytic activity;GO:0016772//transferase activity, transferring phosphorus-containing groups;GO:0004672//protein kinase activity;G…	GO:0044267//cellular protein metabolic process;GO:0006464//cellular protein modification process;GO:0071704//organic substance metabolic process;GO:0044237//cellular metabolic process;GO:0009987//cellular process;GO:0036211//protein modification process;GO:0043412//macromolecule modification;GO:0019538//protein metabolic process;GO:0006793//phosphorus metabolic process;GO:0043170//macromolecule m…
UNIGENE0002954	10	0	0.47	-0.84	-0.92	-	--	-	-	-	-
UNIGENE0003119	10	0	0.51	-0.9	-0.99	-	--	-	-	-	-
UNIGENE0003236	10	0	-0.09	-1.19	-1.52	-	--	-	-	-	-
UNIGENE0003314	10	0	0.33	-0.68	-0.84	klhl22	PREDICTED: kelch-like protein 22 [Sinocyclocheilus rhinocerous]	-	-	-	-
UNIGENE0003479	10	0	0.14	-1.17	-1.01	ZNF585B	PREDICTED: gastrula zinc finger protein XlCGF8.2DB-like isoform X1 [Sinocyclocheilus anshuiensis]	-	-	-	-
UNIGENE0003489	10	0	0.49	-0.65	-0.7	-	--	-	-	-	-
UNIGENE0003532	10	0	1.17	-1.52	-0.83	-	--	-	-	-	-
UNIGENE0003576	10	0	0.42	-0.79	-0.52	SH2D3C	PREDICTED: SH2 domain-containing protein 3C [Sinocyclocheilus grahami]	-	GO:0005623//cell;GO:0044464//cell part	-	GO:0023052//signaling;GO:0050794//regulation of cellular process;GO:0007165//signal transduction;GO:0051716//cellular response to stimulus;GO:0044700//single organism signaling;GO:0065007//biological regulation;GO:0044699//single-organism process;GO:0009987//cellular process;GO:0035556//intracellular signal transduction;GO:0007154//cell communication;GO:0050896//response to stimulus;GO:0050789//r…
UNIGENE0003764	10	0	0.14	-0.96	-0.54	-	UDP glucuronosyltransferase 2 family polypeptide a1 isoform 3 [Danio rerio]	-	-	GO:0016740//transferase activity;GO:0016757//transferase activity, transferring glycosyl groups;GO:0003824//catalytic activity	-
UNIGENE0003820	10	0	0.71	-1	-0.73	-	PREDICTED: RNA-directed DNA polymerase from mobile element jockey-like [Cyprinus carpio]	-	-	-	-
UNIGENE0003828	10	0	0.45	-0.58	-0.83	-	PREDICTED: unconventional myosin-XVI-like isoform X1 [Sinocyclocheilus anshuiensis]	-	-	-	-
UNIGENE0004000	10	0	0.28	-0.62	-0.73	Fbxw10	PREDICTED: CMT1A duplicated region transcript 1 protein-like isoform X1 [Cyprinus carpio]	-	-	-	-
UNIGENE0004020	10	0	-1.12	-9.3	-9.3	-	PREDICTED: uncharacterized protein LOC107721799 [Sinocyclocheilus rhinocerous]	-	-	-	-
UNIGENE0004069	10	0	0.61	-0.65	-0.82	-	--	-	-	-	-
UNIGENE0004216	10	0	0.13	-1.04	-0.59	-	--	-	-	-	-
UNIGENE0004247	10	0	0.44	-0.91	-0.37	-	--	-	-	-	-
UNIGENE0004373	10	0	0.21	-1.17	-0.55	-	--	-	-	-	-
UNIGENE0004525	10	0	0.45	-0.9	-0.98	-	PREDICTED: integrin alpha-V-like [Sinocyclocheilus grahami]	-	-	-	-
UNIGENE0004570	10	0	0.3	-0.72	-1.04	-	--	-	-	-	-
UNIGENE0004754	10	0	0.74	-2.37	-2.43	-	hypothetical protein cypCar_00040181, partial [Cyprinus carpio]	-	-	-	-
UNIGENE0004765	10	0	0.19	-2.02	-2.08	-	--	-	-	-	-
UNIGENE0004889	10	0	0.41	-1.62	-1.25	-	--	-	-	-	-
UNIGENE0004985	10	0	-0.57	-3.01	-2.04	-	--	-	-	-	-
UNIGENE0005110	10	0	0.42	-3.45	-2.48	-	--	-	-	-	-
UNIGENE0005330	10	0	-0.35	-1.61	-1.62	-	--	-	-	-	-
UNIGENE0005432	10	0	0.3	-1.41	-1.43	-	--	-	-	-	-
UNIGENE0005623	10	0	0.01	-1.13	-0.71	-	TPA_exp: polyprotein [Danio rerio]	-	-	-	-
UNIGENE0005663	10	0	-0.03	-1.86	-1.19	-	--	-	-	-	-
UNIGENE0005690	10	0	0.03	-1.19	-1.39	-	reverse transcriptase [Danio rerio]	-	-	-	-
UNIGENE0006030	10	0	-0.19	-1.67	-1.7	-	--	-	-	-	-
UNIGENE0006033	10	0	0.24	-1.45	-1.06	-	--	-	-	-	-
UNIGENE0006044	10	0	0	-1.03	-0.58	slc47a1	PREDICTED: LOW QUALITY PROTEIN: multidrug and toxin extrusion protein 1-like [Cyprinus carpio]	-	GO:0044425//membrane part;GO:0016020//membrane;GO:0031224//intrinsic component of membrane	GO:0005215//transporter activity;GO:0022804//active transmembrane transporter activity;GO:0022857//transmembrane transporter activity;GO:0015291//secondary active transmembrane transporter activity	GO:0044763//single-organism cellular process;GO:0044699//single-organism process;GO:0009987//cellular process;GO:0051179//localization;GO:0051234//establishment of localization
UNIGENE0006070	10	0	-0.07	-1.2	-1.22	-	PREDICTED: uncharacterized protein LOC109084308 [Cyprinus carpio]	-	-	-	-
UNIGENE0006101	10	0	0.38	-1.11	-1.34	-	--	-	-	-	-
UNIGENE0006364	10	0	0.33	-0.89	-1.09	CCDC175	PREDICTED: myosin-11-like [Sinocyclocheilus rhinocerous]	ko04530//Tight junction//Cellular commiunity//Cellular Processes	-	-	-
UNIGENE0006373	10	0	0.84	-1.27	-0.98	-	--	-	-	-	-
UNIGENE0006428	10	0	1.14	-1.76	-1.53	Igkv7-33	immunoglobulin light chain, partial [Cyprinus carpio]	-	-	-	-
UNIGENE0006487	10	0	0.19	-0.84	-0.39	CACNA1C	PREDICTED: voltage-dependent L-type calcium channel subunit alpha-1C-like isoform X7 [Sinocyclocheilus rhinocerous]	ko04010//MAPK signaling pathway//Signal transduction//Environmental Information Processing;ko04020//Calcium signaling pathway//Signal transduction//Environmental Information Processing;ko04261//Adrenergic signaling in cardiomyocytes//Circulatory system//Organismal Systems;ko04270//Vascular smooth muscle contraction//Circulatory system//Organismal Systems;ko04260//Cardiac muscle contraction//Circu…	-	-	-
UNIGENE0006615	10	0	-0.06	-1.36	-1.25	-	PREDICTED: uncharacterized protein LOC107694444 [Sinocyclocheilus anshuiensis]	-	-	-	-
UNIGENE0006619	10	0	0.15	-1.29	-0.96	-	--	-	-	-	-
UNIGENE0006694	10	0	0.35	-0.76	-0.6	Rab7a	zgc:91909 protein [Ctenopharyngodon idella]	ko04144//Endocytosis//Transport and catabolism//Cellular Processes;ko04145//Phagosome//Transport and catabolism//Cellular Processes	-	GO:0003824//catalytic activity;GO:0036094//small molecule binding;GO:1901363//heterocyclic compound binding;GO:0001882//nucleoside binding;GO:0097367//carbohydrate derivative binding;GO:0005488//binding;GO:0097159//organic cyclic compound binding;GO:0032549//ribonucleoside binding;GO:0001883//purine nucleoside binding;GO:0032550//purine ribonucleoside binding	GO:0045184//establishment of protein localization;GO:0050789//regulation of biological process;GO:0065007//biological regulation;GO:0007165//signal transduction;GO:0044700//single organism signaling;GO:0035556//intracellular signal transduction;GO:0050794//regulation of cellular process;GO:0033036//macromolecule localization;GO:0023052//signaling;GO:0051179//localization;GO:0008104//protein local…
UNIGENE0006708	10	0	0.28	-0.91	-1.07	-	PREDICTED: cilia- and flagella-associated protein 61 [Sinocyclocheilus grahami]	-	-	-	-
UNIGENE0006726	10	0	0.65	-0.91	-0.75	-	TPA: transposase domain-containing protein [Danio rerio]	-	-	-	-
UNIGENE0006976	10	0	0.45	-0.87	-0.68	KCNMB2	PREDICTED: calcium-activated potassium channel subunit beta-2-like [Sinocyclocheilus rhinocerous]	ko04270//Vascular smooth muscle contraction//Circulatory system//Organismal Systems	-	GO:0022836//gated channel activity;GO:0022892//substrate-specific transporter activity;GO:0005215//transporter activity;GO:0022857//transmembrane transporter activity;GO:0008324//cation transmembrane transporter activity;GO:0022839//ion gated channel activity;GO:0022891//substrate-specific transmembrane transporter activity;GO:0005216//ion channel activity;GO:0022803//passive transmembrane transp…	GO:0006810//transport;GO:0051179//localization;GO:0051234//establishment of localization;GO:0044699//single-organism process;GO:0006811//ion transport;GO:0044765//single-organism transport;GO:0030001//metal ion transport;GO:1902578//single-organism localization;GO:0006812//cation transport
UNIGENE0007072	10	0	0.64	-0.69	-0.86	-	--	-	-	-	-
UNIGENE0007232	10	0	-0.49	-3.26	-3.2	-	--	-	-	-	-
UNIGENE0007494	10	0	0.13	-0.7	-0.89	-	tumor protein p53 inducible nuclear protein 2 [Danio rerio]	-	-	-	-
UNIGENE0007604	10	0	0.49	-0.77	-0.24	-	--	-	-	-	-
UNIGENE0007717	10	0	0.54	-1.46	-1.48	grhl1	PREDICTED: grainyhead-like protein 1 homolog [Sinocyclocheilus grahami]	-	GO:0044464//cell part;GO:0005623//cell;GO:0005622//intracellular;GO:0044424//intracellular part	-	GO:0044767//single-organism developmental process;GO:0030154//cell differentiation;GO:0044699//single-organism process;GO:0032502//developmental process;GO:0002064//epithelial cell development;GO:0060429//epithelium development;GO:0048468//cell development;GO:0009987//cellular process;GO:0030855//epithelial cell differentiation;GO:0009888//tissue development;GO:0044763//single-organism cellular p…
UNIGENE0007815	10	0	0.36	-1.01	-1.41	-	--	-	-	-	-
UNIGENE0007868	10	0	0.42	-0.83	-0.55	STX19	PREDICTED: syntaxin-19-like [Sinocyclocheilus anshuiensis]	ko04130//SNARE interactions in vesicular transport//Folding, sorting and degradation//Genetic Information Processing	-	-	-
UNIGENE0007869	10	0	-0.39	-1.52	-1.42	-	--	-	-	-	-
UNIGENE0007925	10	0	0.38	-1.14	-0.52	-	--	-	-	-	-
UNIGENE0008160	10	0	0.08	-0.82	-1.05	FAM47E	PREDICTED: protein FAM47E-like [Sinocyclocheilus anshuiensis]	-	-	-	-
UNIGENE0008203	10	0	1.02	-1.3	-0.48	MDN1	PREDICTED: protein IWS1 homolog [Sinocyclocheilus grahami]	-	-	-	-
UNIGENE0008239	10	0	0.37	-0.62	-0.77	Nek1	PREDICTED: serine/threonine-protein kinase Nek6-like [Sinocyclocheilus rhinocerous]	-	-	GO:0097159//organic cyclic compound binding;GO:0032550//purine ribonucleoside binding;GO:1901363//heterocyclic compound binding;GO:0016772//transferase activity, transferring phosphorus-containing groups;GO:0016773//phosphotransferase activity, alcohol group as acceptor;GO:0004672//protein kinase activity;GO:0001883//purine nucleoside binding;GO:0016301//kinase activity;GO:0032549//ribonucleoside…	GO:0019538//protein metabolic process;GO:0044237//cellular metabolic process;GO:0044260//cellular macromolecule metabolic process;GO:0071704//organic substance metabolic process;GO:0008152//metabolic process;GO:0043412//macromolecule modification;GO:0044267//cellular protein metabolic process;GO:0009987//cellular process;GO:0044238//primary metabolic process;GO:0036211//protein modification proce…
UNIGENE0008300	10	0	0.57	-0.56	-0.71	-	--	-	-	-	-
UNIGENE0008328	10	0	-0.21	-1.55	-1.29	-	--	-	-	-	-
UNIGENE0008453	10	0	0.18	-0.83	-0.4	GNN	PREDICTED: tetratricopeptide repeat protein 41-like [Sinocyclocheilus rhinocerous]	-	-	GO:1901363//heterocyclic compound binding;GO:0005488//binding;GO:0097159//organic cyclic compound binding;GO:0036094//small molecule binding	-
UNIGENE0008463	10	0	0.33	-1.99	-1.92	-	--	-	-	-	-
UNIGENE0008467	10	0	0.08	-1.66	-1.38	-	--	-	-	-	-
UNIGENE0008489	10	0	0.21	-1.33	-1.39	-	--	-	-	-	-
UNIGENE0008509	10	0	0.5	-0.79	-0.91	-	--	-	-	-	-
UNIGENE0008635	10	0	0.74	-1.45	-1.23	-	--	-	-	-	-
UNIGENE0008696	10	0	0.45	-0.66	-0.81	-	--	-	-	-	-
UNIGENE0008731	10	0	0.08	-1.06	-0.78	-	--	-	-	-	-
UNIGENE0008736	10	0	0.09	-1.13	-0.64	-	--	-	-	-	-
UNIGENE0008745	10	0	-0.05	-1.44	-1.14	-	--	-	-	-	-
UNIGENE0008789	10	0	0.03	-1.33	-0.62	-	--	-	-	-	-
UNIGENE0008809	10	0	0.8	-1.39	-0.81	-	--	-	-	-	-
UNIGENE0008871	10	0	0.49	-0.94	-0.93	-	--	-	-	-	-
UNIGENE0008879	10	0	0.01	-2.59	-1.53	-	--	-	-	-	-
UNIGENE0008882	10	0	0.05	-0.9	-0.96	-	--	-	-	-	-
UNIGENE0008883	10	0	0.06	-0.86	-0.99	-	--	-	-	-	-
UNIGENE0008944	10	0	0.33	-1.19	-0.56	-	--	-	-	-	-
UNIGENE0009197	10	0	0.72	-1.02	-1.5	-	PREDICTED: Krueppel-like factor 8 [Cyprinus carpio]	-	-	-	-
UNIGENE0009215	10	0	0.35	-1.8	-1.2	-	--	-	-	-	-
UNIGENE0009284	10	0	-0.2	-1.75	-1.55	-	--	-	-	-	-
UNIGENE0009293	10	0	0.07	-1.34	-1.14	-	--	-	-	-	-
UNIGENE0009335	10	0	0.35	-0.7	-0.64	-	--	-	-	-	-
UNIGENE0009385	10	0	-0.16	-4.31	-2.5	-	--	-	-	-	-
UNIGENE0009434	10	0	0.42	-1.19	-0.94	-	--	-	-	-	-
UNIGENE0009456	10	0	0.35	-0.62	-0.9	-	PREDICTED: uncharacterized protein LOC106528481 [Austrofundulus limnaeus]	-	-	-	-
UNIGENE0009583	10	0	0.41	-0.89	-1.24	-	--	-	-	-	-
UNIGENE0009587	10	0	0.28	-0.91	-0.89	Rpgr	PREDICTED: trichohyalin-like isoform X1 [Sinocyclocheilus anshuiensis]	-	-	-	-
UNIGENE0009718	10	0	0.01	-1.17	-1.09	-	--	-	-	-	-
UNIGENE0009804	10	0	0.07	-1.36	-1.18	-	--	-	-	-	-
UNIGENE0009961	10	0	0.27	-0.89	-0.7	DNAI1	PREDICTED: dynein intermediate chain 1, axonemal [Sinocyclocheilus anshuiensis]	-	-	-	-
UNIGENE0009980	10	0	0.19	-0.89	-0.83	-	--	-	-	-	-
UNIGENE0010039	10	0	0.39	-0.75	-0.87	Mrc2	PREDICTED: C-type mannose receptor 2-like [Cyprinus carpio]	-	-	-	-
UNIGENE0010098	10	0	0.34	-1.26	-0.95	-	--	-	-	-	-
UNIGENE0010145	10	0	0.53	-0.79	-0.65	-	--	-	-	-	-
UNIGENE0010276	10	0	0.61	-3.14	-1.68	zgc:113413	PREDICTED: natterin-like protein isoform X2 [Sinocyclocheilus anshuiensis]	-	-	-	-
UNIGENE0010402	10	0	0.5	-0.75	-0.74	-	--	-	-	-	-
UNIGENE0010537	10	0	0.71	-1.44	-0.7	-	--	-	-	-	-
UNIGENE0010622	10	0	0.07	-1.18	-0.98	-	--	-	-	-	-
UNIGENE0010654	10	0	0.14	-1.43	-1.07	-	--	-	-	-	-
UNIGENE0010678	10	0	0.7	-1.03	-1.06	-	--	-	-	-	-
UNIGENE0010715	10	0	0.45	-0.86	-0.34	ABCG2	PREDICTED: ATP-binding cassette sub-family G member 2-like [Sinocyclocheilus grahami]	ko02010//ABC transporters//Membrane transport//Environmental Information Processing	-	GO:0032549//ribonucleoside binding;GO:0016817//hydrolase activity, acting on acid anhydrides;GO:0032550//purine ribonucleoside binding;GO:0016787//hydrolase activity;GO:0005488//binding;GO:1901363//heterocyclic compound binding;GO:0003824//catalytic activity;GO:0097367//carbohydrate derivative binding;GO:0097159//organic cyclic compound binding;GO:0016462//pyrophosphatase activity;GO:0001882//nuc…	GO:0009261//ribonucleotide catabolic process;GO:0009056//catabolic process;GO:1901292//nucleoside phosphate catabolic process;GO:0009154//purine ribonucleotide catabolic process;GO:0009259//ribonucleotide metabolic process;GO:0044238//primary metabolic process;GO:0006725//cellular aromatic compound metabolic process;GO:0071704//organic substance metabolic process;GO:0044248//cellular catabolic pr…
UNIGENE0010793	10	0	0.49	-1.1	-0.71	-	--	-	-	-	-
UNIGENE0010883	10	0	1.55	-3.63	-2.86	-	PREDICTED: leucine-rich repeat extensin-like protein 5 [Danio rerio]	-	-	-	-
UNIGENE0010929	10	0	0.57	-0.85	-0.39	-	--	-	-	-	-
UNIGENE0010940	10	0	0.46	-0.48	-0.65	CCDC88A	PREDICTED: girdin-like isoform X2 [Sinocyclocheilus rhinocerous]	-	-	-	-
UNIGENE0010988	10	0	0.52	-1.39	-1.64	-	--	-	-	-	-
UNIGENE0011083	10	0	-0.33	-2.14	-2.3	-	PREDICTED: uncharacterized protein LOC109096714 isoform X4 [Cyprinus carpio]	-	-	-	-
UNIGENE0011100	10	0	0.34	-0.66	-0.92	RAP1GDS1	PREDICTED: rap1 GTPase-GDP dissociation stimulator 1-B-like isoform X2 [Sinocyclocheilus grahami]	-	-	-	-
UNIGENE0011197	10	0	0.64	-1.43	-0.69	-	--	-	-	-	-
UNIGENE0011244	10	0	0.17	-1.07	-1.09	-	--	-	-	-	-
UNIGENE0011370	10	0	0.11	-1.12	-0.52	-	PREDICTED: verrucotoxin subunit beta-like [Sinocyclocheilus grahami]	-	-	-	-
UNIGENE0011451	10	0	1	-1.65	-2.2	MDV078	PREDICTED: C-X-C motif chemokine 13-like [Sinocyclocheilus rhinocerous]	ko04060//Cytokine-cytokine receptor interaction//Signaling molecules and interaction//Environmental Information Processing	-	-	GO:0050896//response to stimulus
UNIGENE0011613	10	0	-0.18	-1.38	-1.46	-	--	-	-	-	-
UNIGENE0011717	10	0	0.08	-1.28	-0.64	Tf2-9	Pol polyprotein [Dicentrarchus labrax]	-	-	-	-
UNIGENE0011794	10	0	-0.11	-1.11	-0.61	Scrt2	PREDICTED: transcriptional repressor scratch 2-like, partial [Cyprinus carpio]	-	-	GO:0043167//ion binding;GO:0005488//binding;GO:0043169//cation binding	GO:0009987//cellular process;GO:0035556//intracellular signal transduction;GO:0044700//single organism signaling;GO:0044699//single-organism process;GO:0050794//regulation of cellular process;GO:0010941//regulation of cell death;GO:0030330//DNA damage response, signal transduction by p53 class mediator;GO:0042127//regulation of cell proliferation;GO:0044763//single-organism cellular process;GO:00…
UNIGENE0011827	10	0	0.29	-1.02	-1.09	-	--	-	-	-	-
UNIGENE0011833	10	0	0.33	-1.57	-0.86	-	--	-	-	-	-
UNIGENE0011854	10	0	0.44	-1.31	-1.01	-	--	-	-	-	-
UNIGENE0012065	10	0	0.05	-1.86	-1.78	-	--	-	-	-	-
UNIGENE0012113	10	0	0.42	-0.56	-0.58	-	--	-	-	-	-
UNIGENE0012301	10	0	0.06	-1.12	-1.31	-	--	-	-	-	-
UNIGENE0012318	10	0	0.28	-1.06	-0.65	Mtus2	PREDICTED: microtubule-associated tumor suppressor candidate 2-like isoform X1 [Danio rerio]	-	-	-	-
UNIGENE0012512	10	0	0.59	-0.99	-0.32	-	--	-	-	-	-
UNIGENE0012550	10	0	0.13	-1.15	-0.61	-	--	-	-	-	-
UNIGENE0012663	10	0	0.45	-0.9	-0.96	C22orf31	PREDICTED: integrin alpha-V-like [Sinocyclocheilus grahami]	-	-	-	-
UNIGENE0012664	10	0	0.49	-0.78	-0.4	-	PREDICTED: putative nuclease HARBI1 [Cyprinus carpio]	-	-	-	-
UNIGENE0012684	10	0	0.05	-1.84	-1.31	-	--	-	-	-	-
UNIGENE0012758	10	0	0.45	-0.83	-0.33	-	--	-	-	-	-
UNIGENE0012780	10	0	0.23	-1.85	-1.61	-	hypothetical protein cypCar_00048958 [Cyprinus carpio]	-	-	-	-
UNIGENE0012875	10	0	-0.11	-1.5	-1.83	-	--	-	-	-	-
UNIGENE0013009	10	0	0.24	-1.61	-1.46	-	--	-	-	-	-
UNIGENE0013017	10	0	0.5	-0.62	-0.55	-	--	-	-	-	-
UNIGENE0013106	10	0	-0.35	-1.61	-1.77	-	--	-	-	-	-
UNIGENE0013178	10	0	-0.52	-4.46	-2.95	-	--	-	-	-	-
UNIGENE0013183	10	0	0.32	-1.86	-0.93	-	--	-	-	-	-
UNIGENE0013240	10	0	-1.75	-10.04	-10.04	pol	PREDICTED: LOW QUALITY PROTEIN: dynein heavy chain 6, axonemal-like, partial [Pundamilia nyererei]	-	-	-	-
UNIGENE0013322	10	0	0.42	-1.01	-0.65	-	PREDICTED: X-linked retinitis pigmentosa GTPase regulator-like isoform X1 [Sinocyclocheilus grahami]	-	-	-	GO:0048856//anatomical structure development;GO:0032989//cellular component morphogenesis;GO:0007399//nervous system development;GO:0042461//photoreceptor cell development;GO:0032502//developmental process;GO:0048666//neuron development;GO:0007423//sensory organ development;GO:0007275//multicellular organism development;GO:0007018//microtubule-based movement;GO:0003351//epithelial cilium movement…
UNIGENE0013382	10	0	-0.06	-2.34	-1.76	-	--	-	-	-	-
UNIGENE0013394	10	0	0.33	-1.85	-1.6	-	--	-	-	-	-
UNIGENE0013468	10	0	-0.74	-3.28	-3.35	-	--	-	-	-	-
UNIGENE0013636	10	0	0.24	-2.49	-1.18	-	hypothetical protein cypCar_00047016 [Cyprinus carpio]	-	-	-	-
UNIGENE0013684	10	0	0.28	-2.29	-1.16	-	--	-	-	-	-
UNIGENE0013705	10	0	0.32	-1.2	-0.58	-	--	-	-	-	-
UNIGENE0013734	10	0	-0.15	-1.66	-1.74	-	--	-	-	-	-
UNIGENE0013754	10	0	0.45	-1.61	-1.7	-	--	-	-	-	-
UNIGENE0013827	10	0	0.52	-2.52	-1.93	-	--	-	-	-	-
UNIGENE0013830	10	0	-0.16	-2.51	-1.76	-	--	-	-	-	-
UNIGENE0013838	10	0	-0.13	-1.26	-1.31	Rln3	PREDICTED: relaxin-3-like [Sinocyclocheilus anshuiensis]	-	-	-	-
UNIGENE0013876	10	0	1.38	-1.42	-1.21	-	--	-	-	-	-
UNIGENE0013911	10	0	-0.15	-2.7	-1.42	-	--	-	-	-	-
UNIGENE0014102	10	0	-0.09	-2	-2.36	-	--	-	-	-	-
UNIGENE0014196	10	0	0.5	-0.58	-0.37	-	--	-	-	-	-
UNIGENE0014334	10	0	0.46	-0.97	-0.51	-	--	-	-	-	-
UNIGENE0014392	10	0	0.92	-1.88	-2.64	-	--	-	-	-	-
UNIGENE0014400	10	0	0.56	-2.89	-1.19	-	--	-	-	-	-
UNIGENE0014513	10	0	0.48	-1.15	-1.24	-	--	-	-	-	-
UNIGENE0014701	10	0	0.63	-1.06	-0.69	-	--	-	-	-	-
UNIGENE0014732	10	0	0.26	-1.72	-1.41	-	--	-	-	-	-
UNIGENE0014816	10	0	-0.39	-1.92	-2.03	-	PREDICTED: uncharacterized protein LOC107741534 isoform X1 [Sinocyclocheilus rhinocerous]	-	-	-	-
UNIGENE0014837	10	0	1	-1.41	-1.72	-	PREDICTED: epidermal differentiation-specific protein-like [Sinocyclocheilus grahami]	-	-	-	-
UNIGENE0014858	10	0	0.62	-2.41	-1.47	-	--	-	-	-	-
UNIGENE0014917	10	0	0.03	-1.44	-1.61	-	--	-	-	-	-
UNIGENE0014946	10	0	0.46	-0.9	-1.01	-	--	-	-	-	-
UNIGENE0015196	10	0	1.18	-1.46	-1.31	-	--	-	-	-	-
UNIGENE0015672	10	0	-0.19	-1.85	-1.99	-	--	-	-	-	-
UNIGENE0015802	10	0	0.44	-0.81	-0.99	-	--	-	-	-	-
UNIGENE0015814	10	0	0.85	-1.01	-1.03	-	--	-	-	-	-
UNIGENE0015858	10	0	0.45	-0.86	-0.29	Hist1h1b	PREDICTED: histone H1.4-like [Sinocyclocheilus rhinocerous]	-	-	-	-
UNIGENE0016053	10	0	0.55	-1.51	-1.12	-	--	-	-	-	-
UNIGENE0016202	10	0	1.03	-1.21	-1.05	-	--	-	-	-	-
UNIGENE0016219	10	0	0.74	-1.12	-0.37	-	--	-	-	-	-
UNIGENE0016231	10	0	0.6	-0.95	-0.54	Pkd1l2	PREDICTED: LOW QUALITY PROTEIN: polycystic kidney disease protein 1-like 2 [Cyprinus carpio]	-	-	-	-
UNIGENE0016233	10	0	0.63	-0.92	-0.54	-	PREDICTED: polycystic kidney disease protein 1-like 2 [Sinocyclocheilus grahami]	-	-	-	-
UNIGENE0016257	10	0	0.15	-1.51	-1.94	-	--	-	-	-	-
UNIGENE0016279	10	0	0.31	-0.92	-0.36	-	PREDICTED: kin of IRRE-like protein 1 [Cyprinus carpio]	-	-	-	-
UNIGENE0016367	10	0	1.41	-1.86	-1.17	-	--	-	-	-	-
UNIGENE0016397	10	0	0.99	-1	-1.3	-	--	-	-	-	-
UNIGENE0016602	10	0	0.37	-10.25	-10.25	-	PREDICTED: zinc finger protein 37-like [Nothobranchius furzeri]	-	-	-	-
UNIGENE0016735	10	0	0.07	-2.83	-1.77	Lphn1	PREDICTED: adhesion G protein-coupled receptor L1-like [Cyprinus carpio]	-	-	-	-
UNIGENE0016830	10	0	-0.32	-2.44	-1.37	-	--	-	-	-	-
UNIGENE0017117	10	0	0.03	-1.37	-0.73	-	--	-	-	-	-
UNIGENE0017188	10	0	0.16	-2.13	-1	-	--	-	-	-	-
UNIGENE0017195	10	0	0.6	-2.76	-1.61	X-element\ORF2	PREDICTED: LOW QUALITY PROTEIN: lipoxygenase homology domain-containing protein 1-like [Pundamilia nyererei]	ko04540//Gap junction//Cellular commiunity//Cellular Processes	-	-	-
UNIGENE0017388	10	0	0.36	-1.09	-0.64	Sall3	sal-like protein 3 [Danio rerio]	-	GO:0005623//cell;GO:0043231//intracellular membrane-bounded organelle;GO:0044464//cell part;GO:0044424//intracellular part;GO:0043226//organelle;GO:0043229//intracellular organelle;GO:0005622//intracellular;GO:0043227//membrane-bounded organelle	GO:0003676//nucleic acid binding;GO:0005488//binding;GO:0043167//ion binding;GO:0043169//cation binding;GO:0097159//organic cyclic compound binding;GO:1901363//heterocyclic compound binding	GO:0048699//generation of neurons;GO:0044249//cellular biosynthetic process;GO:0018130//heterocycle biosynthetic process;GO:0032502//developmental process;GO:0010467//gene expression;GO:0048856//anatomical structure development;GO:0030154//cell differentiation;GO:0021537//telencephalon development;GO:0035108//limb morphogenesis;GO:0050789//regulation of biological process;GO:0060322//head develop…
UNIGENE0017470	10	0	0.74	-1.1	-0.55	-	--	-	-	-	-
UNIGENE0017726	10	0	0.81	-1.33	-0.52	-	--	-	-	-	-
UNIGENE0017731	10	0	0.16	-1.61	-1.88	-	--	-	-	-	-
UNIGENE0017741	10	0	0.44	-0.98	-0.6	-	--	-	-	-	-
UNIGENE0017805	10	0	0.76	-1.52	-1.38	-	--	-	-	-	-
UNIGENE0017839	10	0	0.66	-1.14	-1.43	-	--	-	-	-	-
UNIGENE0017840	10	0	-0.11	-1.66	-1.87	-	--	-	-	-	-
UNIGENE0017948	10	0	0.5	-1.7	-0.94	-	--	-	-	-	-
UNIGENE0018096	10	0	0.89	-0.84	-1.11	-	--	-	-	-	-
UNIGENE0018164	10	0	-0.02	-2.42	-1.55	-	--	-	-	-	-
UNIGENE0018314	10	0	0.3	-1.47	-0.86	-	--	-	-	-	-
UNIGENE0018406	10	0	0.94	-1.53	-2.23	-	--	-	-	-	-
UNIGENE0018463	10	0	0.64	-2.79	-2.35	-	--	-	-	-	-
UNIGENE0018542	10	0	0.93	-1.04	-1.3	-	--	-	-	-	-
UNIGENE0018559	10	0	0.25	-3.17	-4.31	-	--	-	-	-	-
UNIGENE0018622	10	0	0.54	-2.44	-2.01	-	--	-	-	-	-
UNIGENE0019046	10	0	1.04	-3.4	-1.67	-	--	-	-	-	-
UNIGENE0019047	10	0	1.07	-2.8	-2.79	-	--	-	-	-	-
UNIGENE0019190	10	0	0.66	-0.95	-1.14	-	--	-	-	-	-
UNIGENE0019368	10	0	0.3	-2.22	-2.15	-	PREDICTED: LOW QUALITY PROTEIN: leucine zipper protein 4 [Panthera pardus]	-	-	-	-
UNIGENE0019505	10	0	0.3	-1.26	-0.52	-	--	-	-	-	-
UNIGENE0019608	10	0	0.32	-1.24	-0.7	-	--	-	-	-	-
UNIGENE0019624	10	0	0.04	-2.43	-1.83	-	--	-	-	-	-
UNIGENE0019813	10	0	0.51	-0.7	-0.71	IFIT1	interferon-inducible protein IFI56 [Carassius auratus]	-	-	-	-
UNIGENE0019937	10	0	-0.14	-1.95	-1.06	-	--	-	-	-	-
UNIGENE0019939	10	0	0.46	-1.76	-1.9	-	--	-	-	-	-
UNIGENE0019940	10	0	0.14	-1.32	-0.66	-	--	-	-	-	-
UNIGENE0020001	10	0	0.29	-0.9	-0.48	-	--	-	-	-	-
UNIGENE0020375	10	0	0.4	-0.58	-0.78	-	pol-like protein [Danio rerio]	-	-	-	-
UNIGENE0020412	10	0	0.37	-3.64	-2.35	-	--	-	-	-	-
UNIGENE0020516	10	0	0.59	-1.32	-1.03	-	PREDICTED: zinc finger protein 469-like [Sinocyclocheilus rhinocerous]	-	-	-	-
UNIGENE0020545	10	0	0.57	-1.33	-1.46	-	--	-	-	-	-
UNIGENE0020612	10	0	0.87	-1.28	-0.6	rasgrf2	PREDICTED: ras-specific guanine nucleotide-releasing factor 2 isoform X5 [Danio rerio]	ko04010//MAPK signaling pathway//Signal transduction//Environmental Information Processing	-	-	-
UNIGENE0020646	10	0	0.36	-0.96	-0.55	Tlr13	toll-like receptor 21 [Ctenopharyngodon idella]	-	GO:0031224//intrinsic component of membrane;GO:0044425//membrane part;GO:0016020//membrane;GO:0016021//integral component of membrane	GO:0038187//pattern recognition receptor activity;GO:0004871//signal transducer activity;GO:0008329//signaling pattern recognition receptor activity;GO:0004872//receptor activity;GO:0038023//signaling receptor activity;GO:0060089//molecular transducer activity	GO:0080134//regulation of response to stress;GO:0009605//response to external stimulus;GO:0002376//immune system process;GO:0002764//immune response-regulating signaling pathway;GO:0044699//single-organism process;GO:0052305//positive regulation by organism of innate immune response in other organism involved in symbiotic interaction;GO:0007166//cell surface receptor signaling pathway;GO:0051239/…
UNIGENE0020662	10	0	0.26	-1.28	-1.03	-	--	-	-	-	-
UNIGENE0020755	10	0	0.41	-1.03	-0.57	tc1a	transposase [Salmo salar]	-	-	-	-
UNIGENE0020958	10	0	0.7	-1.09	-0.98	-	--	-	-	-	-
UNIGENE0021053	10	0	0.31	-1.21	-0.71	-	--	-	-	-	-
UNIGENE0021161	10	0	0.19	-2.44	-2.27	-	--	-	-	-	-
UNIGENE0021321	10	0	0.62	-0.64	-0.82	-	PREDICTED: uncharacterized protein LOC107738880 [Sinocyclocheilus rhinocerous]	-	-	-	-
UNIGENE0021326	10	0	0.36	-1.62	-1.8	-	PREDICTED: LOW QUALITY PROTEIN: retinitis pigmentosa 1-like 1 protein [Sinocyclocheilus rhinocerous]	-	-	-	-
UNIGENE0021478	10	0	0.08	-1.59	-1.09	NKX1-2	PREDICTED: NK1 transcription factor-related protein 2-like [Sinocyclocheilus anshuiensis]	-	GO:0043226//organelle;GO:0043227//membrane-bounded organelle;GO:0005623//cell;GO:0043229//intracellular organelle;GO:0044424//intracellular part;GO:0005622//intracellular;GO:0044464//cell part;GO:0043231//intracellular membrane-bounded organelle	GO:0005488//binding;GO:0097159//organic cyclic compound binding;GO:0001071//nucleic acid binding transcription factor activity;GO:1901363//heterocyclic compound binding;GO:0003676//nucleic acid binding	GO:0044271//cellular nitrogen compound biosynthetic process;GO:0090304//nucleic acid metabolic process;GO:0034645//cellular macromolecule biosynthetic process;GO:0044238//primary metabolic process;GO:0097659//nucleic acid-templated transcription;GO:0018130//heterocycle biosynthetic process;GO:0006139//nucleobase-containing compound metabolic process;GO:0006351//transcription, DNA-templated;GO:000…
UNIGENE0021583	10	0	0.8	-2.95	-1.29	-	--	-	-	-	-
UNIGENE0021597	10	0	-0.1	-1.75	-1.29	ZNF350	PREDICTED: gastrula zinc finger protein XlCGF8.2DB-like [Cyprinus carpio]	-	-	-	-
UNIGENE0021629	10	0	-0.32	-1.31	-1.43	Nos1ap	PREDICTED: carboxyl-terminal PDZ ligand of neuronal nitric oxide synthase protein-like isoform X1 [Sinocyclocheilus grahami]	-	-	-	-
UNIGENE0021637	10	0	-0.42	-2.15	-2.6	-	--	-	-	-	-
UNIGENE0021661	10	0	-0.2	-1.77	-1.11	-	--	-	-	-	-
UNIGENE0022050	10	0	0.49	-0.96	-0.9	-	--	-	-	-	-
UNIGENE0022215	10	0	0.7	-1.2	-0.71	-	--	-	-	-	-
UNIGENE0022290	10	0	0.58	-0.74	-0.92	-	--	-	-	-	-
UNIGENE0022473	10	0	0.16	-0.65	-0.85	NEK2	PREDICTED: serine/threonine-protein kinase Nek2-like [Sinocyclocheilus grahami]	-	-	GO:0036094//small molecule binding;GO:0001882//nucleoside binding;GO:1901363//heterocyclic compound binding;GO:0032549//ribonucleoside binding;GO:0016773//phosphotransferase activity, alcohol group as acceptor;GO:0016740//transferase activity;GO:0001883//purine nucleoside binding;GO:0016301//kinase activity;GO:0005488//binding;GO:0016772//transferase activity, transferring phosphorus-containing g…	GO:0036211//protein modification process;GO:0032502//developmental process;GO:0030154//cell differentiation;GO:0048731//system development;GO:0043412//macromolecule modification;GO:0048869//cellular developmental process;GO:0044763//single-organism cellular process;GO:0001654//eye development;GO:0007275//multicellular organism development;GO:0006793//phosphorus metabolic process;GO:0071704//organ…
UNIGENE0022510	10	0	1.68	-4.99	-4.99	-	--	-	-	-	-
UNIGENE0022716	10	0	0.36	-1.46	-1.89	-	--	-	-	-	-
UNIGENE0022856	10	0	0.75	-0.96	-0.57	Lasp1	PREDICTED: LIM and SH3 domain protein 1-like [Pygocentrus nattereri]	-	-	-	-
UNIGENE0022863	10	0	-0.73	-4.08	-2.62	-	--	-	-	-	-
UNIGENE0022882	10	0	1.97	-4.19	-2.58	gpr54	kiss1 receptor, partial [Danio rerio]	ko04080//Neuroactive ligand-receptor interaction//Signaling molecules and interaction//Environmental Information Processing	GO:0016020//membrane;GO:0044425//membrane part;GO:0031224//intrinsic component of membrane	GO:0004871//signal transducer activity;GO:0038023//signaling receptor activity;GO:0004872//receptor activity;GO:0060089//molecular transducer activity;GO:0004888//transmembrane signaling receptor activity;GO:0099600//transmembrane receptor activity	GO:0044699//single-organism process;GO:0051716//cellular response to stimulus;GO:0050794//regulation of cellular process;GO:0007267//cell-cell signaling;GO:0044700//single organism signaling;GO:0009987//cellular process;GO:0007165//signal transduction;GO:0050896//response to stimulus;GO:0050789//regulation of biological process;GO:0007154//cell communication;GO:0044763//single-organism cellular p…
UNIGENE0022883	10	0	2.07	-3.86	-2.68	gpr54	G protein-coupled receptor a [Gobiocypris rarus]	ko04080//Neuroactive ligand-receptor interaction//Signaling molecules and interaction//Environmental Information Processing	GO:0016020//membrane;GO:0044425//membrane part;GO:0031224//intrinsic component of membrane	GO:0038023//signaling receptor activity;GO:0004871//signal transducer activity;GO:0004872//receptor activity;GO:0060089//molecular transducer activity;GO:0099600//transmembrane receptor activity;GO:0004888//transmembrane signaling receptor activity	GO:0023052//signaling;GO:0065007//biological regulation;GO:0050789//regulation of biological process;GO:0007267//cell-cell signaling;GO:0007165//signal transduction;GO:0009987//cellular process;GO:0050794//regulation of cellular process;GO:0044700//single organism signaling;GO:0007186//G-protein coupled receptor signaling pathway;GO:0007154//cell communication;GO:0044763//single-organism cellular…
UNIGENE0022891	10	0	0.5	-2.97	-3.09	-	--	-	-	-	-
UNIGENE0022921	10	0	0.67	-0.92	-0.84	-	--	-	-	-	-
UNIGENE0023183	10	0	0.05	-1.48	-0.92	-	--	-	-	-	-
UNIGENE0023437	10	0	-0.06	-1.49	-2.04	-	--	-	-	-	-
UNIGENE0023607	10	0	0.02	-1.06	-0.97	-	--	-	-	-	-
UNIGENE0023608	10	0	0.69	-1.07	-1.29	-	--	-	-	-	-
UNIGENE0023610	10	0	0.4	-0.86	-1	-	PREDICTED: uncharacterized protein LOC108264080, partial [Ictalurus punctatus]	-	-	-	-
UNIGENE0023613	10	0	0.22	-2.75	-1.34	-	--	-	-	-	-
UNIGENE0023684	10	0	0.98	-1.25	-1.52	-	PREDICTED: multidrug resistance-associated protein 1-like isoform X2 [Sinocyclocheilus rhinocerous]	-	-	-	-
UNIGENE0023686	10	0	0.54	-1.45	-0.56	-	--	-	-	-	-
UNIGENE0023759	10	0	-0.21	-1.39	-1.09	-	--	-	-	-	-
UNIGENE0023767	10	0	0.27	-3.42	-4.42	-	PREDICTED: A-kinase anchor protein 5 isoform X3 [Ficedula albicollis]	-	-	-	-
UNIGENE0023970	10	0	0.48	-0.66	-0.52	-	Histone acetyltransferase MYST3 [Macaca fascicularis]	-	-	-	-
UNIGENE0024062	10	0	-0.16	-1.33	-1.02	-	PREDICTED: nesprin-2 [Nanorana parkeri]	-	-	-	-
UNIGENE0024064	10	0	0.89	-5.52	-5.52	-	--	-	-	-	-
UNIGENE0024299	10	0	-0.15	-2.09	-1.32	-	--	-	-	-	-
UNIGENE0024464	10	0	0.51	-0.54	-0.74	-	--	-	-	-	-
UNIGENE0024514	10	0	0.3	-2.65	-1.98	-	--	-	-	-	-
UNIGENE0024660	10	0	0.36	-1.59	-2.22	-	--	-	-	-	-
UNIGENE0024694	10	0	0.52	-0.48	-0.6	-	--	-	-	-	-
UNIGENE0024803	10	0	0.73	-1.94	-0.78	-	PREDICTED: collagen alpha-1(XVII) chain-like isoform X2 [Sinocyclocheilus rhinocerous]	-	-	-	-
UNIGENE0024891	10	0	-0.57	-2.09	-2.15	-	--	-	-	-	-
UNIGENE0024900	10	0	-0.03	-1.62	-1.12	-	--	-	-	-	-
UNIGENE0024986	10	0	0.37	-1.38	-0.65	-	--	-	-	-	-
UNIGENE0025016	10	0	0.64	-0.89	-0.87	-	PREDICTED: protein IWS1 homolog [Sinocyclocheilus grahami]	-	-	-	-
UNIGENE0025017	10	0	0.39	-2.44	-2.27	-	PREDICTED: spore wall protein 2-like [Sinocyclocheilus anshuiensis]	-	-	-	-
UNIGENE0025302	10	0	0.14	-1.06	-0.73	MMP13	PREDICTED: collagenase 3 [Sinocyclocheilus rhinocerous]	-	-	GO:0003824//catalytic activity;GO:0005488//binding;GO:0043167//ion binding;GO:0046872//metal ion binding;GO:0070011//peptidase activity, acting on L-amino acid peptides;GO:0016787//hydrolase activity;GO:0043169//cation binding;GO:0008233//peptidase activity;GO:0004175//endopeptidase activity;GO:0046914//transition metal ion binding	GO:0016485//protein processing;GO:0043170//macromolecule metabolic process;GO:0010467//gene expression;GO:0019538//protein metabolic process;GO:0044238//primary metabolic process;GO:0008152//metabolic process;GO:0051604//protein maturation;GO:0071704//organic substance metabolic process;GO:0006508//proteolysis
UNIGENE0025514	10	0	-0.05	-2.06	-1.95	GNRHR2	gonadotropin releasing hormone receptor 4 [Danio rerio]	ko04080//Neuroactive ligand-receptor interaction//Signaling molecules and interaction//Environmental Information Processing;ko04912//GnRH signaling pathway//Endocrine system//Organismal Systems	GO:0016020//membrane;GO:0044425//membrane part;GO:0031224//intrinsic component of membrane	GO:0004888//transmembrane signaling receptor activity;GO:0004872//receptor activity;GO:0016500//protein-hormone receptor activity;GO:0004930//G-protein coupled receptor activity;GO:0060089//molecular transducer activity;GO:0004871//signal transducer activity;GO:0099600//transmembrane receptor activity;GO:0038023//signaling receptor activity	GO:0032870//cellular response to hormone stimulus;GO:0042221//response to chemical;GO:0071495//cellular response to endogenous stimulus;GO:0071375//cellular response to peptide hormone stimulus;GO:0009725//response to hormone;GO:1901701//cellular response to oxygen-containing compound;GO:0009719//response to endogenous stimulus;GO:1901699//cellular response to nitrogen compound;GO:1901698//respon…
UNIGENE0025575	10	0	-0.16	-2	-1.37	-	--	-	-	-	-
UNIGENE0025664	10	0	0.24	-1.47	-1.25	-	--	-	-	-	-
UNIGENE0025730	10	0	0.42	-2.34	-2.96	MME	PREDICTED: guanine nucleotide-binding protein G(i) subunit alpha-2-like [Cyprinus carpio]	-	-	GO:0016787//hydrolase activity;GO:0070011//peptidase activity, acting on L-amino acid peptides;GO:0003824//catalytic activity;GO:0008233//peptidase activity	GO:0051604//protein maturation;GO:0006508//proteolysis;GO:0008152//metabolic process;GO:0071704//organic substance metabolic process;GO:0043170//macromolecule metabolic process;GO:0016485//protein processing;GO:0044238//primary metabolic process;GO:0010467//gene expression;GO:0019538//protein metabolic process
UNIGENE0025761	10	0	0.75	-1.72	-1.79	-	--	-	-	-	-
UNIGENE0025824	10	0	0.6	-0.64	-0.48	IFIT5	interferon-inducible protein IFI58 [Carassius auratus]	-	-	-	-
UNIGENE0025868	10	0	-0.3	-1.2	-1.05	-	PREDICTED: chromobox protein homolog 7-like [Lates calcarifer]	-	-	-	-
UNIGENE0025955	10	0	1.08	-1.71	-1.77	-	--	-	-	-	-
UNIGENE0025993	10	0	0.08	-1.05	-1.07	LRFN4	PREDICTED: leucine-rich repeat and fibronectin type-III domain-containing protein 2-like [Cyprinus carpio]	-	-	-	-
UNIGENE0026023	10	0	0.54	-0.77	-0.94	-	--	-	-	-	-
UNIGENE0026034	10	0	0.61	-0.95	-1.02	-	--	-	-	-	-
UNIGENE0026129	10	0	0.04	-1.11	-1.5	-	--	-	-	-	-
UNIGENE0026215	10	0	0.06	-0.81	-1.01	cyb5d1	PREDICTED: cytochrome b5 domain-containing protein 1-like [Sinocyclocheilus rhinocerous]	-	-	GO:1901363//heterocyclic compound binding;GO:0005488//binding;GO:0043167//ion binding;GO:0043169//cation binding;GO:0046906//tetrapyrrole binding;GO:0097159//organic cyclic compound binding	-
UNIGENE0026220	10	0	0.45	-0.87	-0.63	-	PREDICTED: uncharacterized protein LOC107668254 [Sinocyclocheilus anshuiensis]	-	-	-	-
UNIGENE0026616	10	0	0.41	-0.64	-0.73	GAS8	growth arrest-specific protein 8 [Danio rerio]	-	GO:0043229//intracellular organelle;GO:0043228//non-membrane-bounded organelle;GO:0005929//cilium;GO:0044424//intracellular part;GO:0042995//cell projection;GO:0015630//microtubule cytoskeleton;GO:0043226//organelle;GO:0043232//intracellular non-membrane-bounded organelle;GO:0005856//cytoskeleton;GO:0044464//cell part;GO:0005623//cell;GO:0005622//intracellular	GO:0031267//small GTPase binding;GO:0005515//protein binding;GO:0051020//GTPase binding;GO:0019899//enzyme binding;GO:0005488//binding;GO:0017016//Ras GTPase binding	GO:0040011//locomotion;GO:0030154//cell differentiation;GO:0023052//signaling;GO:0009987//cellular process;GO:0065007//biological regulation;GO:0007154//cell communication;GO:0048856//anatomical structure development;GO:0050789//regulation of biological process;GO:0044699//single-organism process;GO:0051179//localization;GO:0007165//signal transduction;GO:0007224//smoothened signaling pathway;GO:…
UNIGENE0026727	10	0	0	-1.01	-0.79	-	PREDICTED: uncharacterized protein LOC109067041 [Cyprinus carpio]	-	-	-	-
UNIGENE0026833	10	0	0.44	-1.08	-0.5	-	--	-	-	-	-
UNIGENE0026934	10	0	0.32	-0.79	-0.7	SIX3	PREDICTED: homeobox protein SIX3-like [Sinocyclocheilus grahami]	-	GO:0043226//organelle;GO:0043229//intracellular organelle;GO:0044464//cell part;GO:0005623//cell;GO:0043227//membrane-bounded organelle;GO:0005622//intracellular;GO:0044424//intracellular part;GO:0043231//intracellular membrane-bounded organelle	GO:0003676//nucleic acid binding;GO:0003677//DNA binding;GO:0005488//binding;GO:0097159//organic cyclic compound binding;GO:1901363//heterocyclic compound binding	GO:0048856//anatomical structure development;GO:0044271//cellular nitrogen compound biosynthetic process;GO:0009888//tissue development;GO:0048513//animal organ development;GO:0034654//nucleobase-containing compound biosynthetic process;GO:0032501//multicellular organismal process;GO:0050896//response to stimulus;GO:0016070//RNA metabolic process;GO:0046483//heterocycle metabolic process;GO:00485…
UNIGENE0026946	10	0	0.91	-1.5	-1.37	-	--	-	-	-	-
UNIGENE0026954	10	0	-0.44	-2.29	-2.24	-	--	-	-	-	-
UNIGENE0026991	10	0	0.7	-0.68	-0.78	-	--	-	-	-	-
UNIGENE0027035	10	0	0	-1.43	-1.1	-	--	-	-	-	-
UNIGENE0027058	10	0	0.24	-1.87	-1.77	-	--	-	-	-	-
UNIGENE0027101	10	0	0.86	-0.98	-0.83	-	--	-	-	-	-
UNIGENE0027122	10	0	0.76	-1.88	-2.05	-	--	-	-	-	-
UNIGENE0027473	10	0	0.57	-1.21	-1.29	-	--	-	-	-	-
UNIGENE0027498	10	0	0.54	-1.01	-0.59	-	--	-	-	-	-
UNIGENE0027511	10	0	0.38	-1.11	-0.72	-	--	-	-	-	-
UNIGENE0027512	10	0	0.47	-0.94	-0.33	-	--	-	-	-	-
UNIGENE0027672	10	0	0.04	-1.07	-0.86	-	--	-	-	-	-
UNIGENE0027872	10	0	0.62	-1.26	-0.98	-	--	-	-	-	-
UNIGENE0028159	10	0	-0.02	-1.23	-0.69	-	--	-	-	-	-
UNIGENE0028263	10	0	0.63	-0.93	-0.38	-	--	-	-	-	-
UNIGENE0028310	10	0	-0.51	-2.53	-1.59	-	--	-	-	-	-
UNIGENE0028311	10	0	-0.36	-3.21	-2.03	-	--	-	-	-	-
UNIGENE0028384	10	0	0.1	-1.02	-0.57	Nol4l	PREDICTED: nucleolar protein 4-like isoform X2 [Danio rerio]	-	-	-	-
UNIGENE0028470	10	0	0.03	-1.29	-0.98	-	--	-	-	-	-
UNIGENE0028532	10	0	0.71	-1.19	-0.64	-	--	-	-	-	-
UNIGENE0028614	10	0	0.23	-0.92	-0.91	-	--	-	-	-	-
UNIGENE0028657	10	0	0.71	-1.23	-0.7	Papln	PREDICTED: papilin-like [Sinocyclocheilus anshuiensis]	-	GO:0031012//extracellular matrix	GO:0070011//peptidase activity, acting on L-amino acid peptides;GO:0046872//metal ion binding;GO:0043167//ion binding;GO:0016787//hydrolase activity;GO:0008233//peptidase activity;GO:0046914//transition metal ion binding;GO:0005488//binding;GO:0003824//catalytic activity;GO:0043169//cation binding	-
UNIGENE0028817	10	0	0.59	-0.62	-0.6	-	PREDICTED: shootin-1-like isoform X4 [Haplochromis burtoni]	-	-	-	-
UNIGENE0028850	10	0	0.17	-0.72	-0.83	-	--	-	-	-	-
UNIGENE0028865	10	0	-0.14	-2.07	-1.45	-	--	-	-	-	-
UNIGENE0029084	10	0	0.61	-6.07	-3.27	-	PREDICTED: selenocysteine-specific elongation factor [Sinocyclocheilus rhinocerous]	-	-	-	-
UNIGENE0029181	10	0	1.11	-1.26	-0.71	-	--	-	-	-	-
UNIGENE0029586	10	0	-1.3	-4.74	-4.9	Calhm1	PREDICTED: calcium homeostasis modulator protein 1-like [Sinocyclocheilus anshuiensis]	-	-	-	-
UNIGENE0029635	10	0	0.21	-0.79	-1.07	-	--	-	-	-	-
UNIGENE0029658	10	0	0.01	-1.01	-0.76	H1FX	PREDICTED: histone H1x-like [Sinocyclocheilus anshuiensis]	-	-	GO:0005488//binding;GO:0003676//nucleic acid binding;GO:1901363//heterocyclic compound binding;GO:0097159//organic cyclic compound binding;GO:0003723//RNA binding	-
UNIGENE0029675	10	0	-0.01	-1.08	-1.05	-	--	-	-	-	-
UNIGENE0030083	10	0	-0.34	-1.65	-1.75	dbo	PREDICTED: kelch-like protein diablo [Sinocyclocheilus anshuiensis]	-	-	-	-
UNIGENE0030101	10	0	0.23	-1.67	-1.05	-	--	-	-	-	-
UNIGENE0030127	10	0	0.19	-0.76	-0.86	NKX3-1	PREDICTED: homeobox protein Nkx-3.1-like [Cyprinus carpio]	-	-	-	-
UNIGENE0030130	10	0	0.58	-0.59	-0.57	-	--	-	-	-	-
UNIGENE0030350	10	0	-0.29	-6.69	-3.25	HR3	Nuclear receptor ROR-alpha [Larimichthys crocea]	ko04710//Circadian rhythm//Environmental adaptation//Organismal Systems	-	-	-
UNIGENE0030351	10	0	0.55	-0.85	-0.56	CHORDC1	PREDICTED: cysteine and histidine-rich domain-containing protein 1-like isoform X1 [Cyprinus carpio]	-	-	-	-
UNIGENE0030433	10	0	0.28	-0.74	-0.9	-	TPA_exp: replicase/helicase/endonuclease [Danio rerio]	-	-	-	-
UNIGENE0030469	10	0	0.31	-1.16	-1.24	VMO1	PREDICTED: vitelline membrane outer layer protein 1-like [Sinocyclocheilus rhinocerous]	-	-	-	-
UNIGENE0030566	10	0	0.63	-1.87	-0.74	-	--	-	-	-	-
UNIGENE0030876	10	0	0.07	-0.99	-1.19	-	--	-	-	-	-
UNIGENE0030903	10	0	0.71	-1.19	-0.57	-	--	-	-	-	-
UNIGENE0031038	10	0	0.36	-0.55	-0.82	-	PREDICTED: sperm-associated antigen 8-like [Sinocyclocheilus grahami]	-	-	-	-
UNIGENE0031092	10	0	0.52	-0.78	-0.53	-	PREDICTED: serine/threonine-protein kinase pim-1-like [Sinocyclocheilus anshuiensis]	-	-	-	-
UNIGENE0031093	10	0	0.63	-0.88	-0.31	Pim1	PREDICTED: serine/threonine-protein kinase pim-2-like [Sinocyclocheilus anshuiensis]	-	-	-	-
UNIGENE0031094	10	0	0.19	-1.14	-0.62	-	--	-	-	-	-
UNIGENE0031136	10	0	0.07	-1.23	-1.25	-	hypothetical protein cypCar_00049049 [Cyprinus carpio]	-	-	-	-
UNIGENE0031203	10	0	0.32	-0.65	-0.9	Cfap58	cilia- and flagella-associated protein 58 [Danio rerio]	-	-	-	-
UNIGENE0031209	10	0	0.44	-1.85	-1.01	-	PREDICTED: uncharacterized protein LOC109099509 [Cyprinus carpio]	-	-	-	-
UNIGENE0031413	10	0	0.24	-1.46	-0.71	-	--	-	-	-	-
UNIGENE0031696	10	0	0.17	-0.77	-1.03	IZUMO1	PREDICTED: LOW QUALITY PROTEIN: izumo sperm-egg fusion protein 1-like [Cyprinus carpio]	-	-	-	-
UNIGENE0031841	10	0	1.11	-1.24	-1.39	-	--	-	-	-	-
UNIGENE0031961	10	0	0.39	-2.08	-1.23	-	TPA: transposase domain-containing protein [Danio rerio]	-	-	-	-
UNIGENE0031962	10	0	0.87	-1.78	-0.75	-	--	-	-	-	-
UNIGENE0031963	10	0	-0.37	-2.98	-2.41	-	PREDICTED: inhibin alpha chain isoform X1 [Ictalurus punctatus]	-	-	-	-
UNIGENE0031992	10	0	0.06	-1.83	-0.9	-	--	-	-	-	-
UNIGENE0032047	10	0	0.24	-0.79	-0.88	-	--	-	-	-	-
UNIGENE0032049	10	0	0.3	-1.06	-1.33	-	PREDICTED: uncharacterized 29.1 kDa protein in cryB1 5'region-like, partial [Austrofundulus limnaeus]	-	-	-	-
UNIGENE0032192	10	0	0.42	-1.52	-0.63	-	--	-	-	-	-
UNIGENE0032239	10	0	0.37	-0.71	-0.87	UBXN10	PREDICTED: UBX domain-containing protein 10-like [Sinocyclocheilus anshuiensis]	-	-	-	-
UNIGENE0032305	10	0	0.37	-0.49	-0.68	tc1a	Transposable element Tcb1 transposase [Dicentrarchus labrax]	ko04510//Focal adhesion//Cellular commiunity//Cellular Processes;ko04810//Regulation of actin cytoskeleton//Cell motility//Cellular Processes;ko04270//Vascular smooth muscle contraction//Circulatory system//Organismal Systems	-	-	-
UNIGENE0032393	10	0	0.63	-1.66	-1.77	-	--	-	-	-	-
UNIGENE0032660	10	0	0.38	-2.79	-3.02	-	PREDICTED: uncharacterized protein LOC107709334 [Sinocyclocheilus rhinocerous]	-	-	-	-
UNIGENE0032713	10	0	0.38	-0.43	-0.64	SPAG16	PREDICTED: sperm-associated antigen 16 protein-like [Cyprinus carpio]	-	-	-	-
UNIGENE0032837	10	0	-0.11	-1.19	-1.35	-	--	-	-	-	-
UNIGENE0032910	10	0	-0.08	-1.14	-0.74	-	si:dkey-282h22.5 precursor [Danio rerio]	ko03460//Fanconi anemia pathway//Replication and repair//Genetic Information Processing	-	-	-
UNIGENE0032965	10	0	0.45	-0.47	-0.58	Fam221a	PREDICTED: protein FAM221A-like [Sinocyclocheilus rhinocerous]	-	-	-	-
UNIGENE0033145	10	0	0.42	-1.29	-1.14	-	--	-	-	-	-
UNIGENE0033199	10	0	2.33	-4.36	-2.02	TRGV3	Immunoglobulin light chain, partial [Cyprinus carpio]	-	-	-	-
UNIGENE0033311	10	0	0.9	-2.2	-2.97	-	--	-	-	-	-
UNIGENE0033449	10	0	0.14	-1.01	-0.8	-	--	-	-	-	-
UNIGENE0033506	10	0	0.22	-0.61	-0.86	dld	PREDICTED: delta-like protein D [Sinocyclocheilus anshuiensis]	ko04330//Notch signaling pathway//Signal transduction//Environmental Information Processing	GO:0044444//cytoplasmic part;GO:0044424//intracellular part;GO:0005622//intracellular;GO:0044464//cell part;GO:0031224//intrinsic component of membrane;GO:0016020//membrane;GO:0005737//cytoplasm;GO:0044425//membrane part;GO:0005623//cell	GO:0043169//cation binding;GO:0005515//protein binding;GO:0046872//metal ion binding;GO:0005488//binding;GO:0043167//ion binding;GO:0019904//protein domain specific binding	GO:0044085//cellular component biogenesis;GO:0009952//anterior/posterior pattern specification;GO:0009987//cellular process;GO:0044707//single-multicellular organism process;GO:0007154//cell communication;GO:0030154//cell differentiation;GO:0007389//pattern specification process;GO:0048731//system development;GO:0010927//cellular component assembly involved in morphogenesis;GO:0021522//spinal cor…
UNIGENE0034048	10	0	-0.03	-1.19	-0.6	-	interferon-inducible protein Gig1 [Carassius auratus]	-	-	-	-
UNIGENE0034213	10	0	0.64	-1.05	-1.09	-	--	-	-	-	-
UNIGENE0034388	10	0	-0.35	-2.58	-1.44	nrxn3b	PREDICTED: neurexin-3b-like [Sinocyclocheilus grahami]	ko04514//Cell adhesion molecules (CAMs)//Signaling molecules and interaction//Environmental Information Processing	GO:0016020//membrane	-	GO:0050808//synapse organization;GO:0007154//cell communication;GO:0044707//single-multicellular organism process;GO:0007268//synaptic transmission;GO:0044767//single-organism developmental process;GO:0007399//nervous system development;GO:0048522//positive regulation of cellular process;GO:0099536//synaptic signaling;GO:0050789//regulation of biological process;GO:0007416//synapse assembly;GO:00…
UNIGENE0034398	10	0	0.72	-1.09	-0.88	-	--	-	-	-	-
UNIGENE0034439	10	0	0.36	-1.27	-1.04	-	--	-	-	-	-
UNIGENE0034455	10	0	-0.05	-1.57	-0.87	-	--	-	-	-	-
UNIGENE0034668	10	0	0.31	-1.13	-1.43	-	PREDICTED: UMP-CMP kinase 2, mitochondrial-like isoform X2 [Sinocyclocheilus grahami]	ko01100//Metabolic pathways//Global and Overview//Metabolism;ko00240//Pyrimidine metabolism//Nucleotide metabolism//Metabolism	-	-	-
UNIGENE0034949	10	0	1.01	-1.09	-0.76	-	--	-	-	-	-
UNIGENE0034970	10	0	0.42	-0.57	-0.77	IQCA1	IQ and AAA domain-containing protein-like [Danio rerio]	-	-	-	-
UNIGENE0035089	10	0	0.84	-0.84	-0.87	GPRIN2	PREDICTED: GRIN2-like protein [Ictalurus punctatus]	-	-	-	-
UNIGENE0035158	10	0	0.29	-0.8	-0.75	-	--	-	-	-	-
UNIGENE0035437	10	0	0.37	-0.72	-0.66	FBXO15	PREDICTED: F-box only protein 15-like isoform X1 [Sinocyclocheilus anshuiensis]	-	-	-	-
UNIGENE0035506	10	0	0.3	-0.8	-0.63	-	PREDICTED: X-linked retinitis pigmentosa GTPase regulator-like [Sinocyclocheilus grahami]	-	-	-	-
UNIGENE0035514	10	0	0.28	-0.79	-0.65	-	PREDICTED: uncharacterized protein LOC107692945 isoform X1 [Sinocyclocheilus anshuiensis]	-	-	-	-
UNIGENE0035740	10	0	0.22	-0.84	-0.68	fip1l1	PREDICTED: pre-mRNA 3'-end-processing factor FIP1 isoform X2 [Danio rerio]	ko03015//mRNA surveillance pathway//Translation//Genetic Information Processing	-	-	-
UNIGENE0035889	10	0	0.23	-1.09	-0.6	-	PREDICTED: trichohyalin-like [Sinocyclocheilus grahami]	-	-	-	-
UNIGENE0035890	10	0	0.27	-1.1	-0.92	-	PREDICTED: trichohyalin-like isoform X4 [Sinocyclocheilus anshuiensis]	-	-	-	-
UNIGENE0035923	10	0	0	-0.86	-1.12	-	--	-	-	-	-
UNIGENE0036137	10	0	0.35	-0.55	-0.79	CCDC181	PREDICTED: coiled-coil domain-containing protein 181-like [Sinocyclocheilus rhinocerous]	-	-	-	-
UNIGENE0036189	10	0	0.42	-0.67	-0.33	-	--	-	-	-	-
UNIGENE0036241	10	0	0.31	-0.73	-0.98	Syce2	PREDICTED: synaptonemal complex central element protein 2-like isoform X2 [Cyprinus carpio]	-	-	-	-
UNIGENE0036414	10	0	0.62	-0.98	-0.86	-	--	-	-	-	-
UNIGENE0036416	10	0	0.28	-1.05	-1.26	-	--	-	-	-	-
UNIGENE0036495	10	0	0.56	-0.75	-0.91	Rassf8	PREDICTED: ras association domain-containing protein 8-like [Sinocyclocheilus anshuiensis]	-	-	-	-
UNIGENE0036642	10	0	0.72	-0.65	-0.63	-	--	-	-	-	-
UNIGENE0036648	10	0	0.12	-1.12	-0.53	Gm10881	PREDICTED: fibroblast growth factor receptor 4-like [Cyprinus carpio]	-	-	-	-
UNIGENE0036677	10	0	-0.02	-1.87	-2.4	-	--	-	-	-	-
UNIGENE0036949	10	0	-0.13	-1.72	-1.2	-	--	-	-	-	-
UNIGENE0037238	10	0	0.65	-2.85	-1.76	-	--	-	-	-	-
UNIGENE0037415	10	0	0.24	-0.55	-0.78	-	Si:rp71-56i13.6 protein [Danio rerio]	-	-	-	-
UNIGENE0037459	10	0	0.68	-1.21	-0.6	-	--	-	-	-	-
UNIGENE0037481	10	0	0.24	-0.83	-0.34	Elfn2	PREDICTED: protein phosphatase 1 regulatory subunit 29-like [Sinocyclocheilus anshuiensis]	-	-	-	-
UNIGENE0037512	10	0	0.54	-1.4	-0.64	-	--	-	-	-	-
UNIGENE0037832	10	0	-1.33	-8.86	-8.86	-	--	-	-	-	-
UNIGENE0037970	10	0	0.15	-0.72	-1	C11orf65	PREDICTED: uncharacterized protein C11orf65 homolog isoform X1 [Sinocyclocheilus rhinocerous]	-	-	-	-
UNIGENE0038035	10	0	0.32	-0.81	-0.89	-	--	-	-	-	-
UNIGENE0038161	10	0	0.2	-1.49	-0.88	-	PREDICTED: uncharacterized protein LOC107571528 [Sinocyclocheilus grahami]	-	-	-	GO:0050789//regulation of biological process;GO:0006950//response to stress;GO:0044763//single-organism cellular process;GO:0050896//response to stimulus;GO:0050794//regulation of cellular process;GO:0009987//cellular process;GO:0044699//single-organism process;GO:0006955//immune response;GO:0065007//biological regulation;GO:0002376//immune system process;GO:0006952//defense response
UNIGENE0038234	10	0	0.38	-1.37	-1.65	-	--	-	-	-	-
UNIGENE0038273	10	0	0.47	-0.94	-0.43	Ddr2	PREDICTED: discoidin domain-containing receptor 2-like [Sinocyclocheilus rhinocerous]	-	-	-	-
UNIGENE0038426	10	0	0.25	-1.17	-1.46	Rtp3	PREDICTED: receptor-transporting protein 2 [Danio rerio]	-	-	-	-
UNIGENE0038429	10	0	0.12	-0.91	-0.6	-	--	-	-	-	-
UNIGENE0038743	10	0	0.37	-1.08	-1.35	-	--	-	-	-	-
UNIGENE0038744	10	0	0.26	-0.55	-0.78	KCNB1	PREDICTED: potassium voltage-gated channel subfamily B member 1-like [Sinocyclocheilus anshuiensis]	-	-	-	-
UNIGENE0038849	10	0	0.14	-0.73	-0.98	ERICH2	PREDICTED: nucleolin-like isoform X1 [Sinocyclocheilus rhinocerous]	-	-	-	-
UNIGENE0038891	10	0	0.38	-0.62	-0.77	PIS2	PREDICTED: CDP-diacylglycerol--inositol 3-phosphatidyltransferase [Lepisosteus oculatus]	ko01100//Metabolic pathways//Global and Overview//Metabolism;ko04070//Phosphatidylinositol signaling system//Signal transduction//Environmental Information Processing;ko00564//Glycerophospholipid metabolism//Lipid metabolism//Metabolism;ko00562//Inositol phosphate metabolism//Carbohydrate metabolism//Metabolism	-	-	-
UNIGENE0039017	10	0	0.22	-1.77	-1.22	-	--	-	-	-	-
UNIGENE0039068	10	0	-0.03	-1.42	-0.83	-	--	-	-	-	-
UNIGENE0039073	10	0	0.22	-1.01	-0.6	-	--	-	-	-	-
UNIGENE0039416	10	0	0	-0.87	-1.05	-	PREDICTED: uncharacterized protein C1orf228 homolog isoform X1 [Danio rerio]	-	-	-	-
UNIGENE0039728	10	0	0.48	-1.8	-2.54	-	--	-	-	-	-
UNIGENE0039803	10	0	0	-1.1	-0.71	-	PREDICTED: protein pygopus-like [Cyprinus carpio]	-	-	-	-
UNIGENE0039871	10	0	0.43	-0.81	-0.9	IQCD	PREDICTED: IQ domain-containing protein D-like isoform X1 [Sinocyclocheilus anshuiensis]	-	-	-	-
UNIGENE0039879	10	0	0.66	-1.51	-1.08	-	PREDICTED: OTU domain-containing protein 6B isoform X1 [Danio rerio]	-	-	-	-
UNIGENE0039901	10	0	0.15	-0.77	-0.99	Katnal2	PREDICTED: katanin p60 ATPase-containing subunit A-like 2 isoform X1 [Sinocyclocheilus rhinocerous]	-	GO:0044464//cell part;GO:0044424//intracellular part;GO:0005856//cytoskeleton;GO:0005622//intracellular;GO:0043232//intracellular non-membrane-bounded organelle;GO:0015630//microtubule cytoskeleton;GO:0005623//cell;GO:0043226//organelle;GO:0043229//intracellular organelle;GO:0043228//non-membrane-bounded organelle	GO:1901363//heterocyclic compound binding;GO:0097367//carbohydrate derivative binding;GO:0001883//purine nucleoside binding;GO:0016887//ATPase activity;GO:0015631//tubulin binding;GO:0017111//nucleoside-triphosphatase activity;GO:0005488//binding;GO:0016818//hydrolase activity, acting on acid anhydrides, in phosphorus-containing anhydrides;GO:0032550//purine ribonucleoside binding;GO:0008092//cyt…	GO:0044699//single-organism process;GO:0044763//single-organism cellular process;GO:0007017//microtubule-based process;GO:0009987//cellular process
UNIGENE0039907	10	0	0.61	-0.81	-0.28	APOL6	PREDICTED: apolipoprotein L6-like isoform X2 [Sinocyclocheilus anshuiensis]	-	-	GO:0005488//binding	GO:0033036//macromolecule localization;GO:0051179//localization;GO:0010876//lipid localization
UNIGENE0039908	10	0	0.76	-1.23	-0.54	-	--	-	-	-	-
UNIGENE0039910	10	0	0.25	-1.31	-1.11	-	PREDICTED: DNA (cytosine-5)-methyltransferase 3B-like [Stegastes partitus]	-	-	-	-
UNIGENE0039939	10	0	0.67	-0.69	-0.85	-	RNA-directed DNA polymerase from mobile element jockey [Larimichthys crocea]	-	-	-	-
UNIGENE0040170	10	0	0.26	-0.84	-1.08	Sgms2	PREDICTED: LOW QUALITY PROTEIN: phosphatidylcholine:ceramide cholinephosphotransferase 2-like [Cyprinus carpio]	ko01100//Metabolic pathways//Global and Overview//Metabolism;ko00600//Sphingolipid metabolism//Lipid metabolism//Metabolism	-	-	-
UNIGENE0040222	10	0	0.33	-0.9	-1.09	ppp1r42	PREDICTED: protein phosphatase 1 regulatory subunit 42 [Sinocyclocheilus anshuiensis]	-	GO:0043232//intracellular non-membrane-bounded organelle;GO:0044464//cell part;GO:0043229//intracellular organelle;GO:0043228//non-membrane-bounded organelle;GO:0015630//microtubule cytoskeleton;GO:0005856//cytoskeleton;GO:0044446//intracellular organelle part;GO:0005622//intracellular;GO:0044422//organelle part;GO:0005815//microtubule organizing center;GO:0044430//cytoskeletal part;GO:0044424//i…	GO:0008092//cytoskeletal protein binding;GO:0005515//protein binding;GO:0005488//binding	-
UNIGENE0040257	10	0	0.61	-3.32	-3.57	-	--	-	-	-	-
UNIGENE0040349	10	0	0.09	-1.14	-0.71	-	--	-	-	-	-
UNIGENE0040427	10	0	0.28	-0.6	-0.79	CFAP43	PREDICTED: cilia- and flagella-associated protein 43 [Sinocyclocheilus rhinocerous]	-	-	-	-
UNIGENE0040431	10	0	0.5	-1.1	-0.78	-	--	-	-	-	-
UNIGENE0040615	10	0	0.45	-0.56	-0.64	XKR4	PREDICTED: XK-related protein 4 [Sinocyclocheilus grahami]	-	GO:0044425//membrane part;GO:0016020//membrane;GO:0031224//intrinsic component of membrane	-	-
UNIGENE0040867	10	0	0.34	-0.84	-0.66	Stat1	signal transducer and activator of transcription 1 [Carassius auratus]	ko04630//Jak-STAT signaling pathway//Signal transduction//Environmental Information Processing;ko04620//Toll-like receptor signaling pathway//Immune system//Organismal Systems	GO:0043229//intracellular organelle;GO:0043231//intracellular membrane-bounded organelle;GO:0044424//intracellular part;GO:0005623//cell;GO:0043227//membrane-bounded organelle;GO:0005622//intracellular;GO:0043226//organelle;GO:0044464//cell part	GO:0003676//nucleic acid binding;GO:0097159//organic cyclic compound binding;GO:0060089//molecular transducer activity;GO:0046872//metal ion binding;GO:0005488//binding;GO:1901363//heterocyclic compound binding;GO:0043169//cation binding;GO:0043167//ion binding	GO:0044271//cellular nitrogen compound biosynthetic process;GO:0043170//macromolecule metabolic process;GO:0048856//anatomical structure development;GO:0044249//cellular biosynthetic process;GO:0007154//cell communication;GO:0010467//gene expression;GO:0071704//organic substance metabolic process;GO:0034645//cellular macromolecule biosynthetic process;GO:0032501//multicellular organismal process;…
UNIGENE0040898	10	0	0.66	-1.56	-0.59	MYH4	PREDICTED: myosin-2-like [Sinocyclocheilus grahami]	ko04530//Tight junction//Cellular commiunity//Cellular Processes	-	GO:0016462//pyrophosphatase activity;GO:0016787//hydrolase activity;GO:0008092//cytoskeletal protein binding;GO:0005488//binding;GO:0001883//purine nucleoside binding;GO:0005515//protein binding;GO:0016818//hydrolase activity, acting on acid anhydrides, in phosphorus-containing anhydrides;GO:0097159//organic cyclic compound binding;GO:0036094//small molecule binding;GO:0032549//ribonucleoside bin…	-
UNIGENE0040912	10	0	0.24	-2.16	-1.28	-	--	-	-	-	-
UNIGENE0040979	10	0	-0.25	-1.64	-0.93	-	--	-	-	-	-
UNIGENE0041030	10	0	0.51	-0.59	-0.8	-	novel protein, partial [Danio rerio]	-	-	-	-
UNIGENE0041070	10	0	1.06	-1	-0.96	CAPN3	PREDICTED: calpain-3-like [Sinocyclocheilus anshuiensis]	-	-	-	-
UNIGENE0041314	10	0	0.17	-0.82	-0.91	TMEM232	PREDICTED: transmembrane protein 232-like [Sinocyclocheilus rhinocerous]	-	-	-	-
UNIGENE0041399	10	0	0.45	-1.22	-0.98	SIK2	PREDICTED: serine/threonine-protein kinase SIK2-like isoform X1 [Sinocyclocheilus rhinocerous]	-	-	-	-
UNIGENE0041408	10	0	0.5	-0.55	-0.8	Sgol2	PREDICTED: shugoshin-like 2 isoform X1 [Sinocyclocheilus rhinocerous]	-	-	-	-
UNIGENE0041431	10	0	0.65	-1.13	-0.54	Wipi2	WD repeat domain phosphoinositide-interacting protein 2 [Danio rerio]	-	-	-	-
UNIGENE0041468	10	0	-0.14	-1.36	-1.52	-	--	-	-	-	-
UNIGENE0041557	10	0	0.48	-0.5	-0.71	N4BP2L2	PREDICTED: NEDD4-binding protein 2-like 2 [Sinocyclocheilus rhinocerous]	ko03460//Fanconi anemia pathway//Replication and repair//Genetic Information Processing;ko03440//Homologous recombination//Replication and repair//Genetic Information Processing	-	-	-
UNIGENE0041614	10	0	0.07	-1.02	-0.69	-	--	-	-	-	-
UNIGENE0041625	10	0	0.45	-0.6	-0.86	AK7	PREDICTED: adenylate kinase 7-like isoform X2 [Cyprinus carpio]	ko01100//Metabolic pathways//Global and Overview//Metabolism;ko01110//Biosynthesis of secondary metabolites//Global and Overview//Metabolism;ko01130//Biosynthesis of antibiotics//Global and Overview//Metabolism;ko00230//Purine metabolism//Nucleotide metabolism//Metabolism	-	GO:0005488//binding;GO:0036094//small molecule binding;GO:0097159//organic cyclic compound binding;GO:0001883//purine nucleoside binding;GO:0032549//ribonucleoside binding;GO:0001882//nucleoside binding;GO:0097367//carbohydrate derivative binding;GO:0032550//purine ribonucleoside binding;GO:1901363//heterocyclic compound binding;GO:0016301//kinase activity;GO:0003824//catalytic activity;GO:001677…	GO:0009987//cellular process;GO:0008152//metabolic process;GO:0044237//cellular metabolic process;GO:0006725//cellular aromatic compound metabolic process
UNIGENE0041675	10	0	0.44	-0.97	-1.37	-	--	-	-	-	-
UNIGENE0041752	10	0	0.1	-0.94	-0.5	Slc39a8	PREDICTED: zinc transporter ZIP8-like [Sinocyclocheilus rhinocerous]	-	-	-	-
UNIGENE0041869	10	0	-0.17	-1.13	-1.38	-	PREDICTED: gastrula zinc finger protein XlCGF8.2DB-like [Sinocyclocheilus rhinocerous]	-	-	-	-
UNIGENE0042141	10	0	0.15	-0.99	-0.87	ADGRD1	PREDICTED: adhesion G-protein coupled receptor D1-like [Sinocyclocheilus rhinocerous]	-	GO:0044425//membrane part;GO:0016020//membrane;GO:0031224//intrinsic component of membrane	GO:0004888//transmembrane signaling receptor activity;GO:0099600//transmembrane receptor activity;GO:0060089//molecular transducer activity;GO:0004872//receptor activity;GO:0004871//signal transducer activity;GO:0038023//signaling receptor activity	GO:0044699//single-organism process;GO:0023052//signaling;GO:0050794//regulation of cellular process;GO:0051716//cellular response to stimulus;GO:0050896//response to stimulus;GO:0007154//cell communication;GO:0044700//single organism signaling;GO:0050789//regulation of biological process;GO:0009987//cellular process;GO:0007165//signal transduction;GO:0065007//biological regulation;GO:0007186//G-…
UNIGENE0042148	10	0	0.48	-1.67	-1.14	-	--	-	-	-	-
UNIGENE0042296	10	0	0.45	-0.83	-0.63	MTUS2	PREDICTED: microtubule-associated tumor suppressor candidate 2-like isoform X1 [Sinocyclocheilus rhinocerous]	-	-	-	-
UNIGENE0042363	10	0	0.38	-0.84	-1.21	-	hypothetical protein cypCar_00028232 [Cyprinus carpio]	-	-	-	-
UNIGENE0042467	10	0	0.02	-2.69	-1.76	-	--	-	-	-	-
UNIGENE0042582	10	0	0.42	-1.06	-1.06	-	--	-	-	-	-
UNIGENE0042600	10	0	0.15	-1.46	-0.8	-	--	-	-	-	-
UNIGENE0042713	10	0	0.53	-2.18	-1.75	-	--	-	-	-	-
UNIGENE0042965	10	0	0.1	-0.75	-1	-	--	-	-	-	-
UNIGENE0042978	10	0	-0.29	-1.29	-0.96	ZNF256	PREDICTED: gastrula zinc finger protein XlCGF49.1-like isoform X2 [Sinocyclocheilus grahami]	-	-	-	-
UNIGENE0043091	10	0	0.66	-4.07	-3.92	-	--	-	-	-	-
UNIGENE0043164	10	0	0.47	-0.67	-0.47	-	--	-	-	-	-
UNIGENE0043428	10	0	-0.02	-1.2	-1.29	-	--	-	-	-	-
UNIGENE0043467	10	0	0.06	-1.43	-0.99	-	interferon gamma [Ctenopharyngodon idella]	-	-	-	GO:0006952//defense response;GO:0002376//immune system process;GO:0043207//response to external biotic stimulus;GO:0009617//response to bacterium;GO:0051707//response to other organism;GO:0098542//defense response to other organism;GO:0051704//multi-organism process;GO:0009607//response to biotic stimulus;GO:0050896//response to stimulus;GO:0006950//response to stress;GO:0042742//defense response…
UNIGENE0043468	10	0	0.28	-1.37	-0.9	-	--	-	-	-	-
UNIGENE0043580	10	0	0.21	-0.93	-1.24	lrrc6	PREDICTED: protein tilB homolog [Cyprinus carpio]	-	GO:0005622//intracellular;GO:0044424//intracellular part;GO:0042995//cell projection;GO:0005623//cell;GO:0044464//cell part	-	GO:0060271//cilium morphogenesis;GO:0048731//system development;GO:0035239//tube morphogenesis;GO:0007275//multicellular organism development;GO:0048562//embryonic organ morphogenesis;GO:0009888//tissue development;GO:0072358//cardiovascular system development;GO:0009987//cellular process;GO:0003341//cilium movement;GO:0009653//anatomical structure morphogenesis;GO:0007018//microtubule-based move…
UNIGENE0043630	10	0	0.46	-1.3	-0.82	zyg11	PREDICTED: protein zyg-11 homolog [Sinocyclocheilus rhinocerous]	-	-	-	-
UNIGENE0043646	10	0	0.16	-1.28	-0.76	-	--	-	-	-	-
UNIGENE0043650	10	0	0.1	-0.94	-0.98	-	--	-	-	-	-
UNIGENE0043682	10	0	0.04	-1.1	-1.26	ZNF844	PREDICTED: gastrula zinc finger protein XlCGF7.1-like [Sinocyclocheilus rhinocerous]	-	-	-	-
UNIGENE0043808	10	0	0.16	-1.48	-0.86	-	--	-	-	-	-
UNIGENE0043823	10	0	0.37	-0.66	-0.84	Fam228b	PREDICTED: protein FAM228B isoform X2 [Sinocyclocheilus rhinocerous]	-	-	-	-
UNIGENE0043989	10	0	0.36	-1.37	-0.9	rasgrf2	PREDICTED: ras-specific guanine nucleotide-releasing factor 2 isoform X4 [Danio rerio]	ko04010//MAPK signaling pathway//Signal transduction//Environmental Information Processing	GO:0005623//cell;GO:0042175//nuclear outer membrane-endoplasmic reticulum membrane network;GO:0005622//intracellular;GO:0043226//organelle;GO:0043229//intracellular organelle;GO:0043227//membrane-bounded organelle;GO:0016020//membrane;GO:0044424//intracellular part;GO:0012505//endomembrane system;GO:0044464//cell part;GO:0043231//intracellular membrane-bounded organelle	GO:0005488//binding;GO:0098772//molecular function regulator;GO:0005085//guanyl-nucleotide exchange factor activity;GO:0005088//Ras guanyl-nucleotide exchange factor activity;GO:0005515//protein binding	GO:0023052//signaling;GO:0007165//signal transduction;GO:0044763//single-organism cellular process;GO:0044699//single-organism process;GO:0044700//single organism signaling;GO:0007264//small GTPase mediated signal transduction;GO:0035556//intracellular signal transduction;GO:0007154//cell communication;GO:0050789//regulation of biological process;GO:0065007//biological regulation;GO:0050896//resp…
UNIGENE0044074	10	0	0.28	-1.65	-0.97	-	--	-	-	-	-
UNIGENE0044142	10	0	0.09	-1.16	-1.38	-	--	-	-	-	-
UNIGENE0044354	10	0	0.38	-0.83	-0.66	SFMBT2	PREDICTED: scm-like with four MBT domains protein 2 isoform X1 [Sinocyclocheilus rhinocerous]	-	-	-	GO:0044260//cellular macromolecule metabolic process;GO:0009059//macromolecule biosynthetic process;GO:0009987//cellular process;GO:0044271//cellular nitrogen compound biosynthetic process;GO:0044238//primary metabolic process;GO:0044237//cellular metabolic process;GO:0010467//gene expression;GO:0071704//organic substance metabolic process;GO:0006725//cellular aromatic compound metabolic process;…
UNIGENE0044457	10	0	0.2	-1.24	-0.72	-	--	-	-	-	-
UNIGENE0044465	10	0	0.15	-0.87	-1.02	KCNT2	PREDICTED: potassium channel subfamily T member 1-like [Sinocyclocheilus anshuiensis]	-	-	-	-
UNIGENE0044549	10	0	0.36	-2.24	-1.31	-	--	-	-	-	-
UNIGENE0044582	10	0	0.26	-0.86	-0.47	-	--	-	-	-	-
UNIGENE0044583	10	0	0.12	-1.4	-1.48	-	--	-	-	-	-
UNIGENE0044587	10	0	-0.13	-1.43	-0.82	-	--	-	-	-	-
UNIGENE0044668	10	0	0.29	-0.64	-0.77	CCDC178	PREDICTED: coiled-coil domain-containing protein 178 isoform X1 [Sinocyclocheilus rhinocerous]	-	-	-	-
UNIGENE0044739	10	0	-0.02	-1.62	-0.78	PIGR	PREDICTED: polymeric immunoglobulin receptor-like [Sinocyclocheilus rhinocerous]	ko04672//Intestinal immune network for IgA production//Immune system//Organismal Systems	-	-	-
UNIGENE0044803	10	0	-0.07	-1.37	-1.44	-	--	-	-	-	-
UNIGENE0044819	10	0	0.64	-0.92	-0.27	H2-Ea	PREDICTED: mamu class II histocompatibility antigen, DR alpha chain-like [Sinocyclocheilus rhinocerous]	ko04514//Cell adhesion molecules (CAMs)//Signaling molecules and interaction//Environmental Information Processing;ko04145//Phagosome//Transport and catabolism//Cellular Processes;ko04672//Intestinal immune network for IgA production//Immune system//Organismal Systems	GO:0044425//membrane part;GO:0016020//membrane	-	GO:0002376//immune system process
UNIGENE0044856	10	0	0.2	-1.43	-0.65	-	--	-	-	-	-
UNIGENE0044858	10	0	0.51	-1.21	-0.63	-	--	-	-	-	-
UNIGENE0044915	10	0	0.37	-0.94	-0.95	-	--	-	-	-	-
UNIGENE0044948	10	0	0.19	-1.54	-1.45	-	--	-	-	-	-
UNIGENE0045093	10	0	-0.01	-2.75	-2.85	GVINP1	PREDICTED: LOW QUALITY PROTEIN: interferon-induced very large GTPase 1-like [Cyprinus carpio]	-	-	-	-
UNIGENE0045109	10	0	0.04	-1.39	-0.65	-	--	-	-	-	-
UNIGENE0045156	10	0	-0.01	-1.32	-0.72	-	--	-	-	-	-
UNIGENE0045221	10	0	1.04	-1.33	-1.19	-	PREDICTED: synaptosomal-associated protein 23-like isoform X1 [Cyprinus carpio]	-	-	-	-
UNIGENE0045347	10	0	-0.41	-1.85	-1.32	-	--	-	-	-	-
UNIGENE0045662	10	0	0.2	-0.64	-0.88	-	--	-	-	-	-
UNIGENE0046106	10	0	0.05	-1.41	-1.47	-	--	-	-	-	-
UNIGENE0046107	10	0	0.86	-1.78	-2.29	-	--	-	-	-	-
UNIGENE0046117	10	0	-0.08	-1.97	-1.65	-	--	-	-	-	-
UNIGENE0046231	10	0	0.83	-0.98	-0.71	-	PREDICTED: uncharacterized protein LOC107572457 [Sinocyclocheilus grahami]	-	-	-	-
UNIGENE0046238	10	0	0.02	-1.36	-1.35	-	--	-	-	-	-
UNIGENE0046306	10	0	0.51	-1.08	-0.51	-	--	-	-	-	-
UNIGENE0046406	10	0	0.09	-1.54	-0.94	-	--	-	-	-	-
UNIGENE0046438	10	0	0.03	-1.11	-1.14	-	PREDICTED: uncharacterized protein LOC109203249 isoform X1 [Oreochromis niloticus]	-	-	-	-
UNIGENE0046441	10	0	0.2	-1.2	-1.15	-	--	-	-	-	-
UNIGENE0046482	10	0	0.51	-1.61	-0.81	-	--	-	-	-	-
UNIGENE0046506	10	0	0.41	-0.65	-0.71	Gas2l2	PREDICTED: GAS2-like protein 2 [Sinocyclocheilus rhinocerous]	-	-	-	-
UNIGENE0046537	10	0	0.07	-0.79	-0.96	-	--	-	-	-	-
UNIGENE0046624	10	0	-0.46	-2	-1.88	-	PREDICTED: calcium-responsive transcription factor isoform X2 [Cyprinus carpio]	-	-	-	-
UNIGENE0046625	10	0	0.55	-0.82	-0.68	-	PREDICTED: calcium-responsive transcription factor [Sinocyclocheilus grahami]	-	-	-	-
UNIGENE0046627	10	0	-0.22	-1.37	-1.13	-	--	-	-	-	-
UNIGENE0046630	10	0	0.43	-0.79	-0.78	ZNF41	PREDICTED: gastrula zinc finger protein XlCGF49.1-like [Sinocyclocheilus anshuiensis]	-	-	-	-
UNIGENE0046659	10	0	0.67	-1.31	-1.02	-	--	-	-	-	-
UNIGENE0046791	10	0	0.08	-1.45	-0.67	-	--	-	-	-	-
UNIGENE0046857	10	0	0.28	-1.05	-0.94	-	--	-	-	-	-
UNIGENE0046963	10	0	-0.23	-1.75	-1.65	-	--	-	-	-	-
UNIGENE0047025	10	0	-0.13	-1.09	-1.38	-	--	-	-	-	-
UNIGENE0047076	10	0	0.16	-1.01	-1.18	-	--	-	-	-	-
UNIGENE0047141	10	0	0.32	-0.68	-0.52	-	--	-	-	-	-
UNIGENE0047185	10	0	0.56	-1.13	-1.09	-	--	-	-	-	-
UNIGENE0047186	10	0	-0.05	-2.16	-1.37	-	PREDICTED: uncharacterized protein LOC102081651 [Oreochromis niloticus]	-	-	-	-
UNIGENE0047191	10	0	0.52	-1.01	-1.27	-	--	-	-	-	-
UNIGENE0047262	10	0	0.19	-0.82	-0.69	Cacna1h	PREDICTED: voltage-dependent T-type calcium channel subunit alpha-1H-like [Sinocyclocheilus anshuiensis]	ko04010//MAPK signaling pathway//Signal transduction//Environmental Information Processing;ko04020//Calcium signaling pathway//Signal transduction//Environmental Information Processing	-	-	-
UNIGENE0047342	10	0	0.1	-0.89	-1.02	Nynrin	PREDICTED: protein NYNRIN-like [Nothobranchius furzeri]	-	-	-	-
UNIGENE0047348	10	0	0.05	-1.14	-0.79	EFCAB6	PREDICTED: EF-hand calcium-binding domain-containing protein 6-like [Sinocyclocheilus rhinocerous]	-	-	GO:0043169//cation binding;GO:0043167//ion binding;GO:0046872//metal ion binding;GO:0005488//binding	-
UNIGENE0047436	10	0	0.49	-0.61	-0.65	TTLL10	PREDICTED: protein polyglycylase TTLL10-like isoform X1 [Sinocyclocheilus anshuiensis]	-	-	-	-
UNIGENE0047586	10	0	0.45	-0.91	-0.52	Elfn2	PREDICTED: protein phosphatase 1 regulatory subunit 29-like [Sinocyclocheilus rhinocerous]	-	-	-	-
UNIGENE0047597	10	0	0.62	-1.09	-1.21	-	--	-	-	-	-
UNIGENE0047645	10	0	0.31	-0.54	-0.76	Foxm1	PREDICTED: LOW QUALITY PROTEIN: forkhead box protein M1-like [Cyprinus carpio]	-	GO:0005622//intracellular;GO:0043226//organelle;GO:0043231//intracellular membrane-bounded organelle;GO:0044424//intracellular part;GO:0005623//cell;GO:0043227//membrane-bounded organelle;GO:0044464//cell part;GO:0043229//intracellular organelle	GO:0001071//nucleic acid binding transcription factor activity;GO:0003676//nucleic acid binding;GO:0005488//binding;GO:1901363//heterocyclic compound binding;GO:0003677//DNA binding;GO:0097159//organic cyclic compound binding	GO:1903506//regulation of nucleic acid-templated transcription;GO:0019222//regulation of metabolic process;GO:0044699//single-organism process;GO:0010468//regulation of gene expression;GO:0044767//single-organism developmental process;GO:0009987//cellular process;GO:0019219//regulation of nucleobase-containing compound metabolic process;GO:0051171//regulation of nitrogen compound metabolic proces…
UNIGENE0047716	10	0	-0.06	-1.9	-1.73	-	--	-	-	-	-
UNIGENE0047745	10	0	0.34	-0.97	-0.79	-	PREDICTED: uncharacterized protein LOC107721000 isoform X1 [Sinocyclocheilus rhinocerous]	-	-	-	-
UNIGENE0047872	10	0	-0.04	-1.34	-0.97	Tor1a	PREDICTED: torsin-1A-like [Sinocyclocheilus rhinocerous]	-	-	-	GO:0006458//'de novo' protein folding;GO:0051084//'de novo' posttranslational protein folding;GO:0006457//protein folding;GO:0009987//cellular process
UNIGENE0047893	10	0	0.46	-1.08	-0.47	-	PREDICTED: zinc finger protein 554-like isoform X1 [Pygocentrus nattereri]	-	-	-	-
UNIGENE0047896	10	0	-0.21	-1.46	-1.61	-	--	-	-	-	-
UNIGENE0047936	10	0	0.2	-0.64	-0.82	CCDC114	coiled-coil domain containing 114 [Danio rerio]	-	GO:0044464//cell part;GO:0005929//cilium;GO:0043226//organelle;GO:0005623//cell;GO:0044463//cell projection part;GO:0042995//cell projection;GO:0044441//ciliary part;GO:0044422//organelle part	-	-
UNIGENE0047978	10	0	0.45	-0.72	-0.84	Trim39	PREDICTED: E3 ubiquitin-protein ligase TRIM39-like [Sinocyclocheilus anshuiensis]	-	GO:0005623//cell;GO:0044464//cell part	GO:0005488//binding;GO:0043169//cation binding;GO:0043167//ion binding	-
UNIGENE0048028	10	0	0.71	-1.59	-0.57	-	PREDICTED: RNA-directed DNA polymerase from mobile element jockey-like [Oreochromis niloticus]	-	-	-	-
UNIGENE0048057	10	0	0.55	-1.62	-1.69	-	--	-	-	-	-
UNIGENE0048160	10	0	1.86	-7.26	-7.26	-	hypothetical protein cypCar_00047134, partial [Cyprinus carpio]	-	-	-	-
UNIGENE0048165	10	0	2.1	-5.57	-5.57	-	--	-	-	-	-
UNIGENE0048238	10	0	0.73	-2.41	-1.1	-	--	-	-	-	-
UNIGENE0048263	10	0	0.49	-0.55	-0.65	spef1	PREDICTED: sperm flagellar protein 1-like isoform X1 [Cyprinus carpio]	-	-	-	-
UNIGENE0048625	10	0	0.54	-0.66	-0.44	CUBN	PREDICTED: cubilin-like [Sinocyclocheilus anshuiensis]	-	-	GO:0008233//peptidase activity;GO:0003824//catalytic activity;GO:0004175//endopeptidase activity;GO:0016787//hydrolase activity;GO:0070011//peptidase activity, acting on L-amino acid peptides	GO:0071704//organic substance metabolic process;GO:0043170//macromolecule metabolic process;GO:0006508//proteolysis;GO:0016485//protein processing;GO:0051604//protein maturation;GO:0044238//primary metabolic process;GO:0010467//gene expression;GO:0008152//metabolic process;GO:0019538//protein metabolic process
UNIGENE0048679	10	0	0.02	-1.15	-1.14	-	--	-	-	-	-
UNIGENE0048710	10	0	0.21	-0.82	-1.14	-	--	-	-	-	-
UNIGENE0048813	10	0	0.07	-0.92	-0.96	-	--	-	-	-	-
UNIGENE0048862	10	0	0.51	-0.77	-0.75	Gucy2f	PREDICTED: olfactory guanylyl cyclase GC-D isoform X2 [Danio rerio]	ko00230//Purine metabolism//Nucleotide metabolism//Metabolism;ko04744//Phototransduction//Sensory system//Organismal Systems	-	-	-
UNIGENE0048872	10	0	0.35	-0.94	-0.84	-	ORF2-encoded protein, partial [Danio rerio]	-	-	-	-
UNIGENE0048874	10	0	0.36	-0.81	-0.45	-	ORF2-encoded protein, partial [Danio rerio]	-	-	-	-
UNIGENE0048895	10	0	0.29	-1	-1.14	SYCP1	PREDICTED: LOW QUALITY PROTEIN: synaptonemal complex protein 1-like [Sinocyclocheilus rhinocerous]	-	GO:0031981//nuclear lumen;GO:0044464//cell part;GO:0044422//organelle part;GO:0005623//cell;GO:0070013//intracellular organelle lumen;GO:0005694//chromosome;GO:0043228//non-membrane-bounded organelle;GO:0000793//condensed chromosome;GO:0031974//membrane-enclosed lumen;GO:0044446//intracellular organelle part;GO:0043233//organelle lumen;GO:0043232//intracellular non-membrane-bounded organelle;GO:0…	-	-
UNIGENE0048991	10	0	-0.43	-2.02	-1.33	-	--	-	-	-	-
UNIGENE0049000	10	0	0.38	-1.5	-0.62	-	--	-	-	-	-
UNIGENE0049002	10	0	0.15	-1.17	-0.92	-	PREDICTED: RNA-directed DNA polymerase from mobile element jockey-like [Oryzias latipes]	-	-	-	-
UNIGENE0049045	10	0	0.26	-1.18	-0.91	-	--	-	-	-	-
UNIGENE0049124	10	0	0.28	-0.88	-0.73	DNAH5	PREDICTED: dynein heavy chain 5, axonemal [Danio rerio]	-	-	-	-
UNIGENE0049140	10	0	1.16	-1.02	-1.08	-	PREDICTED: keratin-associated protein 5-4-like, partial [Chlamydotis macqueenii]	-	-	-	-
UNIGENE0049217	10	0	0.33	-0.59	-0.8	Tsnaxip1	PREDICTED: translin-associated factor X-interacting protein 1-like isoform X3 [Sinocyclocheilus anshuiensis]	-	-	-	-
UNIGENE0049241	10	0	0.62	-1.09	-0.53	-	--	-	-	-	-
UNIGENE0049288	10	0	0.67	-1.72	-1.37	-	--	-	-	-	-
UNIGENE0049344	10	0	0.22	-0.6	-0.84	drc7	PREDICTED: dynein regulatory complex subunit 7 [Sinocyclocheilus anshuiensis]	-	-	-	-
UNIGENE0049367	10	0	0.78	-7.72	-3.41	-	--	-	-	-	-
UNIGENE0049370	10	0	0.57	-0.66	-0.88	KIF6	PREDICTED: kinesin-like protein KIF6 [Pygocentrus nattereri]	-	-	-	-
UNIGENE0049524	10	0	1.09	-1.09	-0.99	-	--	-	-	-	-
UNIGENE0049668	10	0	0.41	-0.53	-0.76	-	--	-	-	-	-
UNIGENE0049670	10	0	-0.38	-1.72	-1.2	-	--	-	-	-	-
UNIGENE0049689	10	0	0.26	-0.63	-0.79	-	--	-	-	-	-
UNIGENE0049760	10	0	0.38	-1.8	-1.48	Trim16	PREDICTED: tripartite motif-containing protein 16-like isoform X1 [Sinocyclocheilus rhinocerous]	-	GO:0044464//cell part;GO:0005623//cell	GO:0005488//binding;GO:0043169//cation binding;GO:0043167//ion binding	GO:0050896//response to stimulus;GO:0007165//signal transduction;GO:0044700//single organism signaling;GO:0044699//single-organism process;GO:0007154//cell communication;GO:0050794//regulation of cellular process;GO:0009987//cellular process;GO:0050789//regulation of biological process;GO:0065007//biological regulation;GO:0044763//single-organism cellular process;GO:0023052//signaling;GO:0051716/…
UNIGENE0049763	10	0	0.74	-1.35	-0.55	TRIM25	PREDICTED: E3 ubiquitin/ISG15 ligase TRIM25-like [Sinocyclocheilus anshuiensis]	-	GO:0005623//cell;GO:0044464//cell part	GO:0043167//ion binding;GO:0005488//binding;GO:0043169//cation binding	-
UNIGENE0049916	10	0	-0.21	-1.74	-1.34	-	--	-	-	-	-
UNIGENE0050017	10	0	0.48	-1.11	-0.49	-	--	-	-	-	-
UNIGENE0050082	10	0	0.56	-0.82	-1.11	-	--	-	-	-	-
UNIGENE0050092	10	0	0.84	-1.87	-0.73	-	--	-	-	-	-
UNIGENE0050134	10	0	0.28	-0.86	-0.79	WDR93	PREDICTED: WD repeat-containing protein 93-like [Sinocyclocheilus grahami]	-	-	-	-
UNIGENE0050149	10	0	0.87	-1.39	-0.72	-	reverse transcriptase [Danio rerio]	-	-	-	-
UNIGENE0050261	10	0	0.52	-0.64	-0.66	-	--	-	-	-	-
UNIGENE0050262	10	0	0.43	-1.08	-0.98	abcG23	PREDICTED: ABC transporter G family member 23-like [Sinocyclocheilus anshuiensis]	-	-	GO:0001882//nucleoside binding;GO:0015399//primary active transmembrane transporter activity;GO:0015405//P-P-bond-hydrolysis-driven transmembrane transporter activity;GO:0022857//transmembrane transporter activity;GO:0016462//pyrophosphatase activity;GO:0097367//carbohydrate derivative binding;GO:0016818//hydrolase activity, acting on acid anhydrides, in phosphorus-containing anhydrides;GO:000382…	GO:0051179//localization;GO:0051234//establishment of localization
UNIGENE0050287	10	0	0.4	-0.96	-0.84	-	--	-	-	-	-
UNIGENE0050333	10	0	0.57	-1.34	-1.18	-	--	-	-	-	-
UNIGENE0050447	10	0	0.05	-1.58	-1.08	-	--	-	-	-	-
UNIGENE0050471	10	0	0.41	-0.48	-0.72	EFCAB6	PREDICTED: EF-hand calcium-binding domain-containing protein 6 [Sinocyclocheilus anshuiensis]	-	-	-	-
UNIGENE0050509	10	0	0.47	-1.45	-1.01	-	--	-	-	-	-
UNIGENE0050512	10	0	0.42	-0.5	-0.61	-	PREDICTED: calphotin-like [Salmo salar]	-	-	-	-
UNIGENE0050576	10	0	-0.39	-1.78	-1.21	-	--	-	-	-	-
UNIGENE0050646	10	0	0.51	-0.51	-0.52	ZNF317	PREDICTED: gastrula zinc finger protein XlCGF8.2DB-like isoform X2 [Sinocyclocheilus anshuiensis]	-	-	-	-
UNIGENE0050674	10	0	0.43	-1.27	-1.7	-	--	-	-	-	-
UNIGENE0050972	10	0	0.48	-0.74	-0.68	-	PREDICTED: protein TANC1 [Stegastes partitus]	-	-	-	-
UNIGENE0050997	10	0	0.29	-0.7	-0.77	narf	PREDICTED: nuclear prelamin A recognition factor [Sinocyclocheilus rhinocerous]	-	-	-	-
UNIGENE0051115	10	0	0.39	-0.66	-0.65	NEK10	PREDICTED: serine/threonine-protein kinase Nek10-like [Sinocyclocheilus rhinocerous]	-	-	GO:0016301//kinase activity;GO:0016740//transferase activity;GO:0016773//phosphotransferase activity, alcohol group as acceptor;GO:0003824//catalytic activity;GO:0004672//protein kinase activity;GO:0016772//transferase activity, transferring phosphorus-containing groups	GO:0006793//phosphorus metabolic process;GO:0044260//cellular macromolecule metabolic process;GO:0016310//phosphorylation;GO:0009987//cellular process;GO:0044238//primary metabolic process;GO:0044267//cellular protein metabolic process;GO:0043170//macromolecule metabolic process;GO:0008152//metabolic process;GO:0036211//protein modification process;GO:0019538//protein metabolic process;GO:0044237…
UNIGENE0051197	10	0	0.54	-1.4	-0.63	-	--	-	-	-	-
UNIGENE0051246	10	0	0.61	-1.01	-0.3	ZNF391	PREDICTED: gastrula zinc finger protein XlCGF57.1-like [Sinocyclocheilus grahami]	-	-	-	-
UNIGENE0051259	10	0	0.29	-1.86	-1.31	-	--	-	-	-	-
UNIGENE0051262	10	0	0.41	-1.67	-0.96	-	--	-	-	-	-
UNIGENE0051269	10	0	0.34	-0.92	-1.2	-	--	-	-	-	-
UNIGENE0051271	10	0	0.4	-1.26	-1.3	-	--	-	-	-	-
UNIGENE0051273	10	0	0.69	-0.99	-0.92	-	--	-	-	-	-
UNIGENE0051274	10	0	0.77	-0.81	-0.74	-	--	-	-	-	-
UNIGENE0051432	10	0	0.89	-1	-1.27	-	--	-	-	-	-
UNIGENE0051472	10	0	0.51	-0.69	-0.56	-	--	-	-	-	-
UNIGENE0051818	10	0	0.63	-1.58	-1.76	IGHV3-23	immunoglobulin mu heavy chain, partial [Ctenopharyngodon idella]	-	-	-	-
UNIGENE0051887	10	0	2.21	-6.49	-6.49	-	--	-	-	-	-
UNIGENE0052018	10	0	0.74	-2.26	-1.11	-	--	-	-	-	-
UNIGENE0052019	10	0	-0.19	-1.03	-1.24	-	--	-	-	-	-
UNIGENE0052089	10	0	1.04	-2.18	-1.78	-	--	-	-	-	-
UNIGENE0052220	10	0	0.54	-0.81	-0.46	-	unnamed protein product, partial [Tetraodon nigroviridis]	-	-	-	-
UNIGENE0052228	10	0	0.31	-1.25	-1.09	-	--	-	-	-	-
UNIGENE0052386	10	0	-1.43	-7.52	-7.52	-	--	-	-	-	-
UNIGENE0052459	10	0	0.64	-0.87	-1.18	ZNF282	PREDICTED: gastrula zinc finger protein XlCGF57.1-like [Sinocyclocheilus anshuiensis]	-	-	-	-
UNIGENE0052509	10	0	0.91	-1.33	-1.11	-	--	-	-	-	-
UNIGENE0052524	10	0	0.78	-1.28	-0.54	-	PREDICTED: GTPase IMAP family member 8-like [Sinocyclocheilus grahami]	-	-	-	-
UNIGENE0052627	10	0	0.12	-0.91	-1.05	HCN1	PREDICTED: potassium/sodium hyperpolarization-activated cyclic nucleotide-gated channel 1-like [Sinocyclocheilus rhinocerous]	-	-	-	-
UNIGENE0052788	10	0	0.73	-1.16	-0.51	-	--	-	-	-	-
UNIGENE0052817	10	0	0.19	-1.31	-1.69	-	--	-	-	-	-
UNIGENE0053066	10	0	1	-2.06	-0.81	-	--	-	-	-	-
UNIGENE0053199	10	0	0.09	-1.21	-1.64	-	--	-	-	-	-
UNIGENE0053401	10	0	0.64	-1.29	-0.73	ZNF568	PREDICTED: gastrula zinc finger protein XlCGF7.1-like [Sinocyclocheilus rhinocerous]	-	-	-	-
UNIGENE0053466	10	0	0.38	-1.27	-0.55	drl	PREDICTED: gastrula zinc finger protein XlCGF57.1-like [Sinocyclocheilus rhinocerous]	-	-	-	-
UNIGENE0053613	10	0	-0.08	-1.38	-1.53	-	--	-	-	-	-
UNIGENE0053616	10	0	-0.11	-1.33	-0.75	-	--	-	-	-	-
UNIGENE0053654	10	0	0.55	-1.38	-1.73	CFAP61	PREDICTED: cilia- and flagella-associated protein 61-like [Sinocyclocheilus anshuiensis]	-	-	-	-
UNIGENE0053772	10	0	-0.35	-2.43	-1.81	-	--	-	-	-	-
UNIGENE0053776	10	0	0.81	-1.67	-0.76	-	--	-	-	-	-
UNIGENE0053830	10	0	0.44	-1.14	-1.39	ARFIP2	PREDICTED: arfaptin-2-like isoform X2 [Cyprinus carpio]	-	-	-	-
UNIGENE0053920	10	0	0.96	-1.4	-0.82	-	--	-	-	-	-
UNIGENE0053988	10	0	0.24	-1.9	-1.05	-	--	-	-	-	-
UNIGENE0054001	10	0	0.11	-0.94	-0.64	RTase	PREDICTED: RNA-directed DNA polymerase from mobile element jockey-like [Cyprinus carpio]	-	-	-	-
UNIGENE0054004	10	0	0.54	-1.59	-0.77	-	--	-	-	-	-
UNIGENE0054029	10	0	0.6	-0.99	-0.87	-	--	-	-	-	-
UNIGENE0054092	10	0	0.97	-1.13	-0.63	-	--	-	-	-	-
UNIGENE0054138	10	0	0.05	-1.39	-0.97	pol	PREDICTED: uncharacterized protein LOC109045635 [Cyprinus carpio]	-	-	-	-
UNIGENE0054215	10	0	0.28	-1.36	-1.27	-	--	-	-	-	-
UNIGENE0054278	10	0	0.65	-1.44	-0.58	-	--	-	-	-	-
UNIGENE0054343	10	0	0.14	-0.62	-0.86	Ccdc157	PREDICTED: coiled-coil domain-containing protein 157 [Sinocyclocheilus grahami]	-	-	-	-
UNIGENE0054383	10	0	-0.08	-2.18	-1.55	Pol	NAG13 [Homo sapiens]	-	-	-	-
UNIGENE0054384	10	0	-0.29	-1.75	-1.56	-	PREDICTED: uncharacterized protein LOC103908762 [Danio rerio]	-	-	-	-
UNIGENE0054386	10	0	0.58	-0.95	-0.66	-	PREDICTED: uncharacterized protein LOC109615364 [Esox lucius]	-	-	-	-
UNIGENE0054534	10	0	0.42	-0.79	-0.86	HELB	PREDICTED: DNA helicase B-like [Sinocyclocheilus rhinocerous]	-	-	GO:0016817//hydrolase activity, acting on acid anhydrides;GO:0016787//hydrolase activity;GO:0017111//nucleoside-triphosphatase activity;GO:0016462//pyrophosphatase activity;GO:0016818//hydrolase activity, acting on acid anhydrides, in phosphorus-containing anhydrides;GO:0003824//catalytic activity;GO:0003678//DNA helicase activity;GO:0004386//helicase activity	GO:0006260//DNA replication;GO:0044238//primary metabolic process;GO:1901360//organic cyclic compound metabolic process;GO:0044260//cellular macromolecule metabolic process;GO:0034641//cellular nitrogen compound metabolic process;GO:0006259//DNA metabolic process;GO:0009058//biosynthetic process;GO:0090304//nucleic acid metabolic process;GO:0044249//cellular biosynthetic process;GO:0044237//cellu…
UNIGENE0054698	10	0	-0.55	-2.69	-2.86	-	--	-	-	-	-
UNIGENE0054891	10	0	-0.17	-2.05	-1.1	-	--	-	-	-	-
UNIGENE0055140	10	0	0.14	-2.54	-1.43	-	--	-	-	-	-
UNIGENE0055315	10	0	0.49	-1.06	-0.79	-	--	-	-	-	-
UNIGENE0055339	10	0	0.33	-0.67	-0.94	-	--	-	-	-	-
UNIGENE0055362	10	0	0.02	-1.99	-1.02	-	--	-	-	-	-
UNIGENE0055380	10	0	0.49	-2.03	-0.81	Myh7	PREDICTED: myosin-6-like, partial [Sinocyclocheilus grahami]	ko04261//Adrenergic signaling in cardiomyocytes//Circulatory system//Organismal Systems;ko04530//Tight junction//Cellular commiunity//Cellular Processes;ko04260//Cardiac muscle contraction//Circulatory system//Organismal Systems	-	-	-
UNIGENE0055383	10	0	0.59	-0.92	-0.7	MYH8	PREDICTED: myosin-6-like, partial [Sinocyclocheilus grahami]	ko04261//Adrenergic signaling in cardiomyocytes//Circulatory system//Organismal Systems;ko04530//Tight junction//Cellular commiunity//Cellular Processes;ko04260//Cardiac muscle contraction//Circulatory system//Organismal Systems	-	-	-
UNIGENE0055425	10	0	0.21	-1.66	-1.96	-	--	-	-	-	-
UNIGENE0055488	10	0	0.6	-1.16	-0.43	-	MHC class I protein [Carassius auratus langsdorfii]	-	-	-	-
UNIGENE0055533	10	0	0.35	-2.1	-1.33	-	--	-	-	-	-
UNIGENE0055571	10	0	0.13	-0.79	-0.9	fam83h	PREDICTED: protein FAM83H isoform X1 [Sinocyclocheilus rhinocerous]	-	-	-	-
UNIGENE0055609	10	0	0.19	-0.84	-1.15	Atp8b5	PREDICTED: phospholipid-transporting ATPase ID-like [Sinocyclocheilus anshuiensis]	-	-	-	-
UNIGENE0055714	10	0	0.21	-0.8	-0.76	IVL	PREDICTED: keratin-associated protein 5-9-like [Rattus norvegicus]	-	-	-	-
UNIGENE0055717	10	0	0.12	-0.85	-0.95	Slc20a1	PREDICTED: sodium-dependent phosphate transporter 2-like [Equus przewalskii]	-	-	-	-
UNIGENE0055961	10	0	1.85	-3.24	-4.24	IGKV4-1	immunoglobulin light chain, partial [Cyprinus carpio]	-	-	-	-
UNIGENE0055986	10	0	0.46	-0.59	-0.7	-	PREDICTED: uncharacterized protein LOC109052746 [Cyprinus carpio]	-	-	-	-
UNIGENE0056150	10	0	0.57	-1.41	-0.56	-	--	-	-	-	-
UNIGENE0056205	10	0	0.2	-1.94	-0.94	-	--	-	-	-	-
UNIGENE0056225	10	0	0.25	-0.89	-0.38	USH2A	PREDICTED: LOW QUALITY PROTEIN: usherin [Sinocyclocheilus rhinocerous]	-	-	-	-
UNIGENE0056255	10	0	0.38	-1.11	-0.62	-	--	-	-	-	-
UNIGENE0056386	10	0	1.11	-1.08	-1.07	-	PREDICTED: inhibin alpha chain isoform X1 [Ictalurus punctatus]	-	-	-	-
UNIGENE0056603	10	0	0.38	-0.95	-0.6	-	--	-	-	-	-
UNIGENE0056646	10	0	0.17	-0.99	-0.87	-	--	-	-	-	-
UNIGENE0056723	10	0	0.29	-0.71	-0.9	-	--	-	-	-	-
UNIGENE0056765	10	0	0.65	-1.27	-0.85	-	--	-	-	-	-
UNIGENE0056817	10	0	0.5	-0.9	-0.6	-	--	-	-	-	-
UNIGENE0056872	10	0	0.09	-0.92	-0.63	-	--	-	-	-	-
UNIGENE0056909	10	0	0.69	-0.81	-1.13	-	--	-	-	-	-
UNIGENE0056994	10	0	0.26	-0.98	-0.71	GRIK5	PREDICTED: glutamate receptor ionotropic, kainate 5-like [Sinocyclocheilus grahami]	ko04080//Neuroactive ligand-receptor interaction//Signaling molecules and interaction//Environmental Information Processing	GO:0031224//intrinsic component of membrane;GO:0044464//cell part;GO:0098589//membrane region;GO:0016020//membrane;GO:0044456//synapse part;GO:0044425//membrane part;GO:0045202//synapse;GO:0005623//cell;GO:0071944//cell periphery;GO:0098805//whole membrane;GO:0005886//plasma membrane;GO:0098590//plasma membrane region;GO:0044459//plasma membrane part;GO:0097060//synaptic membrane	GO:0022834//ligand-gated channel activity;GO:0005230//extracellular ligand-gated ion channel activity;GO:0022838//substrate-specific channel activity;GO:0099600//transmembrane receptor activity;GO:0015267//channel activity;GO:0015075//ion transmembrane transporter activity;GO:0005231//excitatory extracellular ligand-gated ion channel activity;GO:0015276//ligand-gated ion channel activity;GO:00052…	GO:1902578//single-organism localization;GO:0051179//localization;GO:0050896//response to stimulus;GO:0023052//signaling;GO:0007166//cell surface receptor signaling pathway;GO:0009987//cellular process;GO:0006811//ion transport;GO:0051716//cellular response to stimulus;GO:0044699//single-organism process;GO:0007165//signal transduction;GO:0007154//cell communication;GO:0007215//glutamate receptor…
UNIGENE0057064	10	0	0.72	-0.72	-0.62	-	--	-	-	-	-
UNIGENE0057066	10	0	0.12	-2.47	-1.59	-	--	-	-	-	-
UNIGENE0057165	10	0	0.43	-1.28	-0.64	-	--	-	-	-	-
UNIGENE0057230	10	0	0.88	-1.39	-0.43	-	--	-	-	-	-
UNIGENE0057311	10	0	0.58	-0.74	-0.65	-	--	-	-	-	-
UNIGENE0057473	10	0	0.89	-1.23	-0.8	-	--	-	-	-	-
UNIGENE0057724	10	0	0.02	-1.76	-1.37	-	PREDICTED: uncharacterized protein LOC103361593 [Stegastes partitus]	-	-	-	-
UNIGENE0057743	10	0	0.31	-0.99	-0.77	Pim1	PREDICTED: serine/threonine-protein kinase pim-3-like [Sinocyclocheilus anshuiensis]	-	-	-	-
UNIGENE0057865	10	0	0.33	-0.77	-0.55	TY3B-G	Retrovirus-related Pol polyprotein from transposon 297 [Larimichthys crocea]	-	-	-	-
UNIGENE0057882	10	0	0.37	-0.68	-0.32	-	--	-	-	-	-
UNIGENE0058033	10	0	0.56	-1.22	-0.47	-	--	-	-	-	-
UNIGENE0058124	10	0	-0.24	-1.47	-1.74	-	--	-	-	-	-
UNIGENE0058130	10	0	0.3	-0.79	-1.03	-	--	-	-	-	-
UNIGENE0058375	10	0	1.82	-6.93	-6.93	-	--	-	-	-	-
UNIGENE0058382	10	0	0	-1.35	-0.95	-	--	-	-	-	-
UNIGENE0058429	10	0	0.49	-0.83	-0.54	-	--	-	-	-	-
UNIGENE0058463	10	0	-0.3	-1.91	-2.42	-	--	-	-	-	-
UNIGENE0058605	10	0	0.19	-1.04	-0.47	-	--	-	-	-	-
UNIGENE0058690	10	0	0.9	-1.56	-1.59	-	--	-	-	-	-
UNIGENE0058724	10	0	0.22	-1.05	-0.55	snai2	PREDICTED: zinc finger protein SNAI2-like isoform X1 [Sinocyclocheilus rhinocerous]	ko04520//Adherens junction//Cellular commiunity//Cellular Processes;ko04390//Hippo signaling pathway//Signal transduction//Environmental Information Processing	-	GO:0043167//ion binding;GO:0097159//organic cyclic compound binding;GO:0005488//binding;GO:0043169//cation binding	GO:0008152//metabolic process;GO:0032501//multicellular organismal process;GO:0048513//animal organ development;GO:0048729//tissue morphogenesis;GO:0044707//single-multicellular organism process;GO:0023051//regulation of signaling;GO:0051179//localization;GO:0048870//cell motility;GO:0043067//regulation of programmed cell death;GO:0044238//primary metabolic process;GO:0050896//response to stimulu…
UNIGENE0058798	10	0	0.45	-0.99	-0.45	KIAA1109	PREDICTED: LOW QUALITY PROTEIN: uncharacterized protein KIAA1109-like, partial [Cyprinus carpio]	-	-	-	-
UNIGENE0058911	10	0	1.29	-1.49	-1.21	-	--	-	-	-	-
UNIGENE0059002	10	0	0.63	-1.81	-1.35	-	--	-	-	-	-
UNIGENE0059215	10	0	0.53	-0.77	-0.31	-	--	-	-	-	-
UNIGENE0059217	10	0	-0.49	-4.55	-3.13	-	--	-	-	-	-
UNIGENE0059240	10	0	0.56	-1.37	-0.98	-	--	-	-	-	-
UNIGENE0059279	10	0	-0.37	-1.99	-1.36	-	--	-	-	-	-
UNIGENE0059373	10	0	0.35	-0.83	-0.41	ZSCAN22	PREDICTED: gastrula zinc finger protein XlCGF7.1-like [Sinocyclocheilus anshuiensis]	-	-	-	-
UNIGENE0059387	10	0	-0.09	-1.96	-0.97	-	PREDICTED: uncharacterized protein LOC107574354 [Sinocyclocheilus grahami]	-	-	-	-
UNIGENE0059424	10	0	0.72	-0.83	-0.86	-	--	-	-	-	-
UNIGENE0059440	10	0	0.16	-2.03	-1.93	-	--	-	-	-	-
UNIGENE0059530	10	0	-0.04	-1.66	-0.98	-	--	-	-	-	-
UNIGENE0059580	10	0	0.32	-1.76	-0.78	-	--	-	-	-	-
UNIGENE0059685	10	0	0.46	-0.71	-0.4	-	--	-	-	-	-
UNIGENE0059705	10	0	0.85	-2.26	-2.59	-	--	-	-	-	-
UNIGENE0059744	10	0	0.33	-1.27	-0.7	TRIM14	PREDICTED: stonustoxin subunit beta-like [Sinocyclocheilus rhinocerous]	-	-	-	-
UNIGENE0059788	10	0	0.15	-1.32	-1.07	-	--	-	-	-	-
UNIGENE0059904	10	0	0.9	-1.63	-0.66	-	--	-	-	-	-
UNIGENE0059979	10	0	0.98	-1.51	-0.65	-	--	-	-	-	-
UNIGENE0060144	10	0	0.06	-3.65	-2.04	-	--	-	-	-	-
UNIGENE0060234	10	0	0.11	-1.94	-1.39	Plp2	PREDICTED: proteolipid protein 2-like [Sinocyclocheilus rhinocerous]	-	-	-	-
UNIGENE0060305	10	0	-0.36	-1.68	-2.02	-	--	-	-	-	-
UNIGENE0060336	10	0	0.66	-0.93	-1.4	-	--	-	-	-	-
UNIGENE0060338	10	0	1.31	-1.81	-0.74	-	--	-	-	-	-
UNIGENE0060412	10	0	1.21	-1.2	-1.37	-	--	-	-	-	-
UNIGENE0060423	10	0	0.67	-2.12	-1.82	-	--	-	-	-	-
UNIGENE0060781	10	0	0.48	-4.86	-2.36	SPRY2	PREDICTED: protein sprouty homolog 2-like [Sinocyclocheilus grahami]	-	-	-	GO:0050789//regulation of biological process;GO:0072358//cardiovascular system development;GO:0072359//circulatory system development;GO:0044700//single organism signaling;GO:0048731//system development;GO:0071310//cellular response to organic substance;GO:0071495//cellular response to endogenous stimulus;GO:0071363//cellular response to growth factor stimulus;GO:0009653//anatomical structure mor…
UNIGENE0060832	10	0	0.11	-2.28	-1.98	-	--	-	-	-	-
UNIGENE0060924	10	0	0.45	-1.61	-1.21	-	PREDICTED: protocadherin Fat 3-like [Cyprinus carpio]	-	-	-	-
UNIGENE0060982	10	0	0.56	-1.19	-0.49	-	PREDICTED: receptor-type tyrosine-protein phosphatase C [Esox lucius]	-	-	-	-
UNIGENE0061019	10	0	0.37	-0.92	-0.46	-	--	-	-	-	-
UNIGENE0061028	10	0	-0.11	-2.36	-2.26	-	--	-	-	-	-
UNIGENE0061308	10	0	0.52	-1.18	-0.66	-	--	-	-	-	-
UNIGENE0061530	10	0	0.62	-1.51	-0.55	-	PREDICTED: uncharacterized protein LOC109101033 [Cyprinus carpio]	-	-	-	-
UNIGENE0061601	10	0	0.31	-1.13	-1.44	-	--	-	-	-	-
UNIGENE0061683	10	0	-0.28	-2.37	-1.62	-	--	-	-	-	-
UNIGENE0061806	10	0	0.61	-1.06	-1.38	-	--	-	-	-	-
UNIGENE0061870	10	0	0.46	-1.72	-1.09	-	--	-	-	-	-
UNIGENE0061887	10	0	-0.43	-3.63	-2.62	-	--	-	-	-	-
UNIGENE0061923	10	0	0.21	-1.23	-1.38	-	--	-	-	-	-
UNIGENE0061935	10	0	0.91	-1.59	-0.62	-	--	-	-	-	-
UNIGENE0061965	10	0	0.19	-1.9	-0.89	-	PREDICTED: CMRF35-like molecule 8 [Sinocyclocheilus anshuiensis]	-	-	-	-
UNIGENE0061979	10	0	0.35	-1.37	-0.93	-	--	-	-	-	-
UNIGENE0061987	10	0	-0.07	-1.46	-1.82	-	--	-	-	-	-
UNIGENE0062069	10	0	0.81	-1.63	-0.95	-	--	-	-	-	-
UNIGENE0062323	10	0	0.21	-2.51	-1.41	-	PREDICTED: rho GTPase-activating protein 44 isoform X4 [Danio rerio]	-	-	-	-
UNIGENE0062398	10	0	0.19	-1.37	-1.33	-	PREDICTED: uncharacterized protein LOC109078467 [Cyprinus carpio]	-	-	-	-
UNIGENE0062472	10	0	0.61	-1.48	-1.93	-	--	-	-	-	-
UNIGENE0062498	10	0	0.22	-2.16	-2.76	-	--	-	-	-	-
UNIGENE0062517	10	0	-0.13	-1.67	-0.89	myt1	PREDICTED: myelin transcription factor 1 isoform X3 [Danio rerio]	-	-	-	-
UNIGENE0062557	10	0	0.65	-1.7	-1.23	-	--	-	-	-	-
UNIGENE0062582	10	0	0.72	-1.28	-1	-	--	-	-	-	-
UNIGENE0062611	10	0	1.57	-1.46	-1.67	-	--	-	-	-	-
UNIGENE0062624	10	0	0.23	-1.06	-1.07	-	--	-	-	-	-
UNIGENE0062660	10	0	0.53	-1.42	-0.69	-	--	-	-	-	-
UNIGENE0062786	10	0	0.81	-2.45	-1.26	-	--	-	-	-	-
UNIGENE0063047	10	0	0.47	-1.15	-0.68	-	PREDICTED: integumentary mucin C.1-like [Astyanax mexicanus]	-	-	-	-
UNIGENE0063147	10	0	2.25	-7.72	-7.72	-	--	-	-	-	-
UNIGENE0063333	10	0	0.07	-1.29	-0.7	-	--	-	-	-	-
UNIGENE0063454	10	0	0.21	-1.92	-0.92	MAGI3	PREDICTED: membrane-associated guanylate kinase, WW and PDZ domain-containing protein 3-like [Sinocyclocheilus rhinocerous]	ko04530//Tight junction//Cellular commiunity//Cellular Processes	-	-	-
UNIGENE0063523	10	0	-0.2	-1.86	-2.23	-	--	-	-	-	-
UNIGENE0063760	10	0	0.44	-3.1	-1.89	-	--	-	-	-	-
UNIGENE0063822	10	0	-0.18	-1.78	-2.14	-	--	-	-	-	-
UNIGENE0063828	10	0	0	-2.14	-1.7	-	--	-	-	-	-
UNIGENE0063953	10	0	0.72	-1.73	-0.82	-	--	-	-	-	-
UNIGENE0063978	10	0	1.41	-1.69	-0.92	-	--	-	-	-	-
UNIGENE0064121	10	0	0.48	-1.18	-1.11	-	--	-	-	-	-
UNIGENE0064152	10	0	-0.18	-2.44	-2.2	-	--	-	-	-	-
UNIGENE0064399	10	0	-0.43	-2.18	-2.45	-	PREDICTED: deleted in malignant brain tumors 1 protein [Astyanax mexicanus]	-	-	-	-
UNIGENE0064505	10	0	0.52	-1.31	-1.23	-	--	-	-	-	-
UNIGENE0064521	10	0	0.84	-1.39	-0.99	-	--	-	-	-	-
UNIGENE0064545	10	0	-0.33	-2.62	-2.48	-	--	-	-	-	-
UNIGENE0064913	10	0	1.15	-2.29	-1.05	-	--	-	-	-	-
UNIGENE0065038	10	0	0.95	-1.7	-1.71	-	--	-	-	-	-
UNIGENE0065041	10	0	0.7	-2.47	-1.14	-	--	-	-	-	-
UNIGENE0065119	10	0	1.72	-2.62	-3.36	-	--	-	-	-	-
UNIGENE0065202	10	0	0.18	-1.71	-0.77	-	Retrovirus-related Pol polyprotein LINE-1 [Larimichthys crocea]	-	-	-	-
UNIGENE0065278	10	0	0.34	-1.67	-1.84	-	--	-	-	-	-
UNIGENE0065572	10	0	-0.38	-3.42	-2.6	-	--	-	-	-	-
UNIGENE0065587	10	0	0.63	-1.07	-1.03	-	--	-	-	-	-
UNIGENE0065615	10	0	0.87	-1.3	-0.54	-	--	-	-	-	-
UNIGENE0065652	10	0	-0.33	-3.06	-1.86	-	--	-	-	-	-
UNIGENE0065750	10	0	0.68	-1.86	-1.07	-	--	-	-	-	-
UNIGENE0065754	10	0	0.32	-0.69	-0.6	Nuak1	PREDICTED: NUAK family SNF1-like kinase 1 [Sinocyclocheilus anshuiensis]	-	-	-	-
UNIGENE0065756	10	0	1.23	-1.91	-0.86	-	--	-	-	-	-
UNIGENE0065769	10	0	-0.19	-3.18	-1.71	-	--	-	-	-	-
UNIGENE0065773	10	0	0.49	-2.18	-1.28	-	--	-	-	-	-
UNIGENE0065778	10	0	0.51	-1.01	-1.12	-	--	-	-	-	-
UNIGENE0066116	10	0	0.27	-2.13	-1.13	Rp1l1	PREDICTED: microtubule-associated protein futsch-like [Cyprinus carpio]	-	-	-	-
UNIGENE0066225	10	0	0.25	-2.37	-1.2	-	--	-	-	-	-
UNIGENE0066241	10	0	0.09	-1.54	-1.67	PROK1	prokineticin-2 precursor [Danio rerio]	-	-	-	-
UNIGENE0066365	10	0	1.31	-2.43	-2.68	cck	PREDICTED: cholecystokinin-like [Sinocyclocheilus anshuiensis]	ko04080//Neuroactive ligand-receptor interaction//Signaling molecules and interaction//Environmental Information Processing	-	-	-
UNIGENE0066537	10	0	0.68	-1.62	-2.13	-	--	-	-	-	-
UNIGENE0066593	10	0	0.49	-2.15	-0.94	-	--	-	-	-	-
UNIGENE0066598	10	0	0.11	-2.95	-2.52	-	--	-	-	-	-
UNIGENE0066822	10	0	0.92	-1	-1.45	-	--	-	-	-	-
UNIGENE0066899	10	0	0.73	-4.07	-1.87	-	--	-	-	-	-
UNIGENE0066973	10	0	-0.28	-1.94	-1.3	-	--	-	-	-	-
UNIGENE0067151	10	0	0.65	-0.67	-0.79	-	--	-	-	-	-
UNIGENE0067180	10	0	0.09	-2.09	-2.73	-	--	-	-	-	-
UNIGENE0067269	10	0	0.03	-1.65	-1.44	ACR	PREDICTED: plasma kallikrein-like isoform X1 [Sinocyclocheilus grahami]	-	-	-	-
UNIGENE0067330	10	0	0.84	-2.16	-1.67	-	--	-	-	-	-
UNIGENE0067476	10	0	-0.51	-2.5	-2.01	-	--	-	-	-	-
UNIGENE0067549	10	0	1.98	-6.11	-6.11	FLNB	PREDICTED: filamin-A-like [Sinocyclocheilus rhinocerous]	ko04010//MAPK signaling pathway//Signal transduction//Environmental Information Processing;ko04510//Focal adhesion//Cellular commiunity//Cellular Processes	-	-	-
UNIGENE0067563	10	0	0.26	-1.78	-1.33	-	--	-	-	-	-
UNIGENE0067704	10	0	0.92	-1.47	-0.94	-	--	-	-	-	-
UNIGENE0067741	10	0	0.01	-1.32	-1.62	ZNF614	PREDICTED: gastrula zinc finger protein XlCGF57.1-like [Sinocyclocheilus grahami]	-	-	-	-
UNIGENE0067888	10	0	-0.41	-1.9	-2.1	-	--	-	-	-	-
UNIGENE0068075	10	0	0.68	-1.13	-1.25	-	--	-	-	-	-
UNIGENE0068238	10	0	0.28	-2.14	-1.38	-	--	-	-	-	-
UNIGENE0068261	10	0	0.33	-1.13	-0.68	-	--	-	-	-	-
UNIGENE0068326	10	0	0.22	-2.52	-1.31	-	--	-	-	-	-
UNIGENE0068578	10	0	-0.31	-1.83	-1.15	-	--	-	-	-	-
UNIGENE0068678	10	0	1.88	-2.17	-1.26	-	--	-	-	-	-
UNIGENE0068813	10	0	0.68	-0.93	-0.92	-	--	-	-	-	-
UNIGENE0068874	10	0	-0.05	-2.38	-1.39	-	--	-	-	-	-
UNIGENE0069035	10	0	-1.12	-5.12	-5.24	-	--	-	-	-	-
UNIGENE0069051	10	0	0.58	-0.96	-1.05	-	--	-	-	-	-
UNIGENE0069065	10	0	1.17	-1.56	-1.45	-	--	-	-	-	-
UNIGENE0069073	10	0	-0.26	-1.47	-1.32	-	--	-	-	-	-
UNIGENE0069158	10	0	0.09	-1.7	-1.38	-	--	-	-	-	-
UNIGENE0069261	10	0	-0.37	-2.19	-2.65	-	--	-	-	-	-
UNIGENE0069280	10	0	0.62	-1.22	-0.63	-	--	-	-	-	-
UNIGENE0069412	10	0	-0.08	-1.29	-1.76	-	--	-	-	-	-
UNIGENE0069418	10	0	0.81	-3.39	-3.64	-	--	-	-	-	-
UNIGENE0069421	10	0	0.55	-1	-1.01	-	--	-	-	-	-
UNIGENE0069535	10	0	0.43	-0.87	-0.8	-	PREDICTED: ribonuclease H2 subunit B-like [Sinocyclocheilus grahami]	-	-	-	-
UNIGENE0069675	10	0	0.71	-0.68	-0.88	-	--	-	-	-	-
UNIGENE0069726	10	0	-1.71	-10.07	-10.07	-	--	-	-	-	-
UNIGENE0069768	10	0	1.17	-1.49	-1.6	-	--	-	-	-	-
UNIGENE0069882	10	0	0.01	-1.05	-1.28	-	--	-	-	-	-
UNIGENE0070138	10	0	0.54	-1.5	-0.87	-	--	-	-	-	-
UNIGENE0070273	10	0	0.06	-1.81	-0.98	-	--	-	-	-	-
UNIGENE0070279	10	0	0.1	-2.98	-3.15	-	--	-	-	-	-
UNIGENE0070354	10	0	-0.02	-3.19	-4.39	-	PREDICTED: kunitz-type serine protease inhibitor bitisilin-3-like [Sinocyclocheilus rhinocerous]	-	-	-	-
UNIGENE0070701	10	0	0.58	-2.12	-0.86	-	--	-	-	-	-
UNIGENE0070731	10	0	0.82	-0.85	-0.71	-	--	-	-	-	-
UNIGENE0070784	10	0	-0.32	-2.7	-3.17	-	--	-	-	-	-
UNIGENE0070879	10	0	0.24	-0.97	-1.36	-	--	-	-	-	-
UNIGENE0070892	10	0	-0.71	-3.22	-3.37	-	--	-	-	-	-
UNIGENE0070917	10	0	1.13	-1.49	-1.6	-	--	-	-	-	-
UNIGENE0070967	10	0	-0.23	-1.23	-0.77	SOCS1	suppressor of cytokine signaling 1 [Ctenopharyngodon idella]	ko04910//Insulin signaling pathway//Endocrine system//Organismal Systems;ko04630//Jak-STAT signaling pathway//Signal transduction//Environmental Information Processing;ko04120//Ubiquitin mediated proteolysis//Folding, sorting and degradation//Genetic Information Processing	-	-	GO:0008152//metabolic process;GO:0044238//primary metabolic process;GO:0032446//protein modification by small protein conjugation;GO:0044699//single-organism process;GO:0009653//anatomical structure morphogenesis;GO:0070647//protein modification by small protein conjugation or removal;GO:0007275//multicellular organism development;GO:0002520//immune system development;GO:0044700//single organism …
UNIGENE0071034	10	0	0.85	-2.71	-1.52	-	--	-	-	-	-
UNIGENE0071074	10	0	0.46	-2.12	-0.93	-	--	-	-	-	-
UNIGENE0071167	10	0	0.78	-1.17	-0.67	-	--	-	-	-	-
UNIGENE0071238	10	0	-0.68	-3.48	-4.35	-	--	-	-	-	-
UNIGENE0071260	10	0	0.38	-4.81	-2.17	-	--	-	-	-	-
UNIGENE0071696	10	0	1.21	-4.03	-4.19	-	--	-	-	-	-
UNIGENE0071834	10	0	1.73	-1.83	-1.88	-	--	-	-	-	-
UNIGENE0071991	10	0	0.31	-1.32	-0.69	-	--	-	-	-	-
UNIGENE0071999	10	0	-2.02	-9.39	-9.39	-	PREDICTED: sterile alpha motif domain-containing protein 3-like isoform X1 [Oreochromis niloticus]	-	-	-	-
UNIGENE0072020	10	0	0.58	-1.2	-0.78	-	--	-	-	-	-
UNIGENE0072293	10	0	-0.49	-2.31	-1.63	-	PREDICTED: zinc finger protein 2-like isoform X1 [Sinocyclocheilus anshuiensis]	-	-	-	-
UNIGENE0072322	10	0	-0.18	-2.04	-1.73	CILP	CILP protein, partial [Danio rerio]	-	-	-	-
UNIGENE0072338	10	0	0.52	-1.29	-0.6	ASPRV1	PREDICTED: retroviral-like aspartic protease 1 [Cyprinus carpio]	-	-	-	-
UNIGENE0072339	10	0	0.46	-1.68	-0.68	-	PREDICTED: uncharacterized protein LOC106512216 [Austrofundulus limnaeus]	-	-	-	-
UNIGENE0072473	10	0	0.55	-1.15	-0.48	-	--	-	-	-	-
UNIGENE0072474	10	0	0.61	-1.81	-1.16	-	--	-	-	-	-
UNIGENE0072539	10	0	0.65	-1.33	-0.51	-	--	-	-	-	-
UNIGENE0072636	10	0	0.17	-0.99	-0.5	-	PREDICTED: uncharacterized protein LOC107669411 [Sinocyclocheilus anshuiensis]	-	-	-	-
UNIGENE0072708	10	0	-0.38	-3.2	-2.63	-	--	-	-	-	-
UNIGENE0072743	10	0	-0.03	-1.74	-0.89	-	--	-	-	-	-
UNIGENE0072809	10	0	0.77	-0.87	-0.97	-	PREDICTED: zinc finger CCHC domain-containing protein 9 isoform X1 [Ictalurus punctatus]	-	-	-	-
UNIGENE0072845	10	0	0.04	-1.55	-0.72	-	--	-	-	-	-
UNIGENE0072930	10	0	-0.47	-3.61	-2	-	--	-	-	-	-
UNIGENE0073051	10	0	0.34	-1.05	-0.74	-	--	-	-	-	-
UNIGENE0073133	10	0	1.06	-1.66	-1	-	--	-	-	-	-
UNIGENE0073224	10	0	0.65	-1.1	-0.48	-	--	-	-	-	-
UNIGENE0073380	10	0	0.53	-1.65	-0.7	-	--	-	-	-	-
UNIGENE0000007	11	0	0.83	-2.9	0.87	-	--	-	-	-	-
UNIGENE0000015	11	0	-0.1	-2.29	0.25	Samsn1	PREDICTED: SAM domain-containing protein SAMSN-1-like isoform X3 [Sinocyclocheilus anshuiensis]	-	-	-	-
UNIGENE0000044	11	0	0.61	-1.27	0.1	-	--	-	-	-	-
UNIGENE0000045	11	0	1.03	-2.66	-0.51	-	--	-	-	-	-
UNIGENE0000121	11	0	0.58	-1.16	-0.01	-	--	-	-	-	-
UNIGENE0000130	11	0	-0.21	-1	0.57	-	--	-	-	-	-
UNIGENE0000167	11	0	-0.39	-5.06	0.98	Gpr87	PREDICTED: G-protein coupled receptor 87-like [Sinocyclocheilus rhinocerous]	ko04080//Neuroactive ligand-receptor interaction//Signaling molecules and interaction//Environmental Information Processing	-	-	-
UNIGENE0000184	11	0	0.39	-2.55	0.55	-	PREDICTED: uncharacterized protein LOC109112478 [Cyprinus carpio]	-	-	-	-
UNIGENE0000186	11	0	-0.21	-1.04	0.44	anxa2-a	PREDICTED: annexin A2-like [Sinocyclocheilus grahami]	-	-	GO:0043168//anion binding;GO:0098772//molecular function regulator;GO:0008289//lipid binding;GO:0043167//ion binding;GO:0030234//enzyme regulator activity;GO:0004857//enzyme inhibitor activity;GO:0005543//phospholipid binding;GO:0055102//lipase inhibitor activity;GO:0005515//protein binding;GO:0005488//binding	-
UNIGENE0000198	11	0	-0.03	-0.75	0.43	THRAP3	PREDICTED: thyroid hormone receptor-associated protein 3-like isoform X2 [Sinocyclocheilus anshuiensis]	-	-	-	-
UNIGENE0000210	11	0	0.03	-1.06	0.41	IRF1	interferon regulatory factor 1 [Carassius auratus]	-	-	GO:0097159//organic cyclic compound binding;GO:1901363//heterocyclic compound binding;GO:0005488//binding;GO:0003676//nucleic acid binding	-
UNIGENE0000224	11	0	1.01	-2.59	1.39	-	--	-	-	-	-
UNIGENE0000225	11	0	0.06	-2.9	-0.55	-	--	-	-	-	-
UNIGENE0000256	11	0	0.59	-0.99	-0.02	-	--	-	-	-	-
UNIGENE0000280	11	0	0.58	-1.62	1.18	F2RL2	PREDICTED: proteinase-activated receptor 3 [Danio rerio]	ko04080//Neuroactive ligand-receptor interaction//Signaling molecules and interaction//Environmental Information Processing	GO:0044425//membrane part;GO:0031224//intrinsic component of membrane;GO:0016020//membrane	GO:0016787//hydrolase activity;GO:0004871//signal transducer activity;GO:0008528//G-protein coupled peptide receptor activity;GO:0060089//molecular transducer activity;GO:0004930//G-protein coupled receptor activity;GO:0001653//peptide receptor activity;GO:0003824//catalytic activity;GO:0099600//transmembrane receptor activity;GO:0004888//transmembrane signaling receptor activity;GO:0004872//rece…	GO:0007186//G-protein coupled receptor signaling pathway;GO:0050789//regulation of biological process;GO:0008152//metabolic process;GO:0051604//protein maturation;GO:0051716//cellular response to stimulus;GO:0007165//signal transduction;GO:0007154//cell communication;GO:0044700//single organism signaling;GO:0010467//gene expression;GO:0043170//macromolecule metabolic process;GO:0050794//regulatio…
UNIGENE0000388	11	0	0.06	-0.66	0.55	Rasa4	PREDICTED: ras GTPase-activating protein 4-like isoform X1 [Sinocyclocheilus anshuiensis]	-	-	-	-
UNIGENE0000429	11	0	0.24	-4.77	0.46	-	PREDICTED: sorting nexin-10A-like [Cyprinus carpio]	-	-	-	-
UNIGENE0000433	11	0	0.17	-1.48	0.76	-	PREDICTED: trichohyalin-like isoform X1 [Sinocyclocheilus grahami]	-	-	-	-
UNIGENE0000488	11	0	0.4	-1.01	0.82	RGS16	PREDICTED: regulator of G-protein signaling 16-like [Cyprinus carpio]	-	-	-	GO:0065007//biological regulation;GO:0009966//regulation of signal transduction;GO:0045744//negative regulation of G-protein coupled receptor protein signaling pathway;GO:0010646//regulation of cell communication;GO:0048523//negative regulation of cellular process;GO:0009968//negative regulation of signal transduction;GO:0010648//negative regulation of cell communication;GO:0048583//regulation of…
UNIGENE0000496	11	0	0.94	-1.16	0.89	NLRC3	PREDICTED: NACHT, LRR and PYD domains-containing protein 12-like, partial [Sinocyclocheilus grahami]	ko04621//NOD-like receptor signaling pathway//Immune system//Organismal Systems	-	-	-
UNIGENE0000499	11	0	0.59	-0.84	-0.05	-	--	-	-	-	-
UNIGENE0000505	11	0	0.5	-4.58	-0.36	-	--	-	-	-	-
UNIGENE0000564	11	0	0.22	-0.77	0.66	-	PREDICTED: neuron navigator 3-like [Poecilia mexicana]	-	-	-	-
UNIGENE0000659	11	0	0.44	-0.75	-0.22	-	PREDICTED: probable GPI-anchored adhesin-like protein PGA55 isoform X1 [Stegastes partitus]	-	-	-	-
UNIGENE0000674	11	0	0.47	-1.34	0.69	-	Mucin-12, partial [Columba livia]	-	-	-	-
UNIGENE0000684	11	0	0.34	-0.93	-0.08	LIAT1	Zgc:64189 [Danio rerio]	-	-	-	-
UNIGENE0000737	11	0	0.13	-7.43	-1.24	-	PREDICTED: E3 ubiquitin-protein ligase RNF213 isoform X3 [Salmo salar]	-	-	-	-
UNIGENE0000740	11	0	0.65	-1.79	0.02	Slc26a4	PREDICTED: pendrin-like [Sinocyclocheilus rhinocerous]	-	GO:0044425//membrane part;GO:0016020//membrane;GO:0031224//intrinsic component of membrane	GO:0022857//transmembrane transporter activity;GO:0005215//transporter activity;GO:0015075//ion transmembrane transporter activity;GO:0022891//substrate-specific transmembrane transporter activity;GO:0022892//substrate-specific transporter activity;GO:0015103//inorganic anion transmembrane transporter activity;GO:0008509//anion transmembrane transporter activity	GO:0048878//chemical homeostasis;GO:0051179//localization;GO:0006811//ion transport;GO:0006820//anion transport;GO:0006950//response to stress;GO:0042592//homeostatic process;GO:0015698//inorganic anion transport;GO:0044763//single-organism cellular process;GO:0065007//biological regulation;GO:0006810//transport;GO:0044699//single-organism process;GO:0009987//cellular process;GO:0009628//response…
UNIGENE0000779	11	0	0.31	-0.82	0.61	-	--	-	-	-	-
UNIGENE0000792	11	0	0.16	-1.37	-0.36	inaW	PREDICTED: extensin-1-like [Nannospalax galili]	-	-	-	-
UNIGENE0000821	11	0	-0.15	-0.74	0.39	-	--	-	-	-	-
UNIGENE0000912	11	0	-0.18	-2.72	1.17	Mpeg1	PREDICTED: macrophage-expressed gene 1 protein-like [Cyprinus carpio]	-	-	-	-
UNIGENE0000931	11	0	-0.54	-2.48	-0.41	LUM	zgc:86661, partial [Danio rerio]	-	-	-	GO:0009987//cellular process;GO:0009790//embryo development;GO:0007600//sensory perception;GO:0071840//cellular component organization or biogenesis;GO:0050877//neurological system process;GO:0050953//sensory perception of light stimulus;GO:0032502//developmental process;GO:0007275//multicellular organism development;GO:0048513//animal organ development;GO:0044767//single-organism developmental p…
UNIGENE0000941	11	0	0.23	-1.31	0.55	PRDM1	PREDICTED: PR domain zinc finger protein 1-like isoform X3 [Cyprinus carpio]	-	-	-	-
UNIGENE0001075	11	0	1.26	-6.92	-1.17	-	--	-	-	-	-
UNIGENE0001105	11	0	-0.31	-2.26	-0.23	-	PREDICTED: small ubiquitin-related modifier 1-B-like [Clupea harengus]	-	-	-	-
UNIGENE0001127	11	0	0.1	-0.68	0.55	-	PREDICTED: myosin-IIIa-like [Sinocyclocheilus rhinocerous]	-	-	-	-
UNIGENE0001174	11	0	0.11	-1.08	-0.32	-	--	-	-	-	-
UNIGENE0001262	11	0	0.56	-8.39	-0.78	-	--	-	-	-	-
UNIGENE0001335	11	0	0.82	-1.7	0.67	IGHV3-23	immunoglobulin HY heavy chain [Ctenopharyngodon idella]	-	-	-	-
UNIGENE0001355	11	0	0.6	-1.24	0.37	NXPE3	PREDICTED: NXPE family member 3-like [Danio rerio]	-	-	-	-
UNIGENE0001374	11	0	1.63	-3.49	0.49	-	--	-	-	-	-
UNIGENE0001393	11	0	0.55	-0.65	0.05	-	PREDICTED: probable E3 ubiquitin-protein ligase RNF144A-A [Cyprinus carpio]	-	-	-	-
UNIGENE0001406	11	0	1.21	-2.61	1.17	-	PREDICTED: interferon-induced very large GTPase 1-like [Danio rerio]	-	-	-	-
UNIGENE0001409	11	0	0.66	-1.43	-0.42	-	--	-	-	-	-
UNIGENE0001424	11	0	-1.04	-2.58	0.04	WT1	PREDICTED: Wilms tumor protein homolog [Sinocyclocheilus rhinocerous]	-	-	-	-
UNIGENE0001429	11	0	0.43	-2.69	1.11	CDH26	PREDICTED: B-cadherin-like [Sinocyclocheilus anshuiensis]	-	-	-	-
UNIGENE0001431	11	0	0.48	-0.68	0.45	-	--	-	-	-	-
UNIGENE0001473	11	0	-0.12	-1.59	-0.19	-	--	-	-	-	-
UNIGENE0001515	11	0	-0.29	-1.69	-0.12	xkr8	PREDICTED: XK-related protein 8-like [Sinocyclocheilus grahami]	-	-	-	-
UNIGENE0001519	11	0	0.57	-1.26	-0.16	-	--	-	-	-	-
UNIGENE0001577	11	0	-0.29	-2.22	-0.02	-	PREDICTED: B-cell receptor CD22-like isoform X2 [Cyprinus carpio]	-	-	-	-
UNIGENE0001641	11	0	0.56	-2.4	0.73	zgc:113413	PREDICTED: natterin-like protein [Sinocyclocheilus rhinocerous]	-	-	-	-
UNIGENE0001642	11	0	-0.03	-1.66	-0.18	-	--	-	-	-	-
UNIGENE0001678	11	0	0.33	-1.96	0.18	D2	PREDICTED: acetylcholinesterase-like [Cyprinus carpio]	ko00564//Glycerophospholipid metabolism//Lipid metabolism//Metabolism	-	GO:0003824//catalytic activity	-
UNIGENE0001737	11	0	-0.57	-3.25	-0.05	-	PREDICTED: LOW QUALITY PROTEIN: T-cell surface glycoprotein CD8 beta chain-like [Danio rerio]	-	-	-	-
UNIGENE0001741	11	0	0.04	-1.25	0.05	-	--	-	-	-	-
UNIGENE0001783	11	0	0.89	-3.48	-0.19	-	--	-	-	-	-
UNIGENE0001812	11	0	0.42	-0.93	0.6	-	--	-	-	-	-
UNIGENE0001814	11	0	0.06	-1.4	-0.07	-	--	-	-	-	-
UNIGENE0001835	11	0	0.13	-1.21	-0.46	-	--	-	-	-	-
UNIGENE0001846	11	0	0.6	-1.15	0.59	-	--	-	-	-	-
UNIGENE0001874	11	0	0.66	-0.82	0.68	-	PREDICTED: junctional adhesion molecule A-like, partial [Sinocyclocheilus grahami]	-	-	-	-
UNIGENE0001918	11	0	0.5	-0.51	0.17	-	--	-	-	-	-
UNIGENE0001935	11	0	0.58	-3.19	0.57	-	--	-	-	-	-
UNIGENE0001964	11	0	0.34	-3.12	-1.3	-	hypothetical protein cypCar_00028232 [Cyprinus carpio]	-	-	-	-
UNIGENE0001970	11	0	0.32	-1.9	-0.36	-	hypothetical protein cypCar_00028232 [Cyprinus carpio]	-	-	-	-
UNIGENE0002000	11	0	0.38	-1.65	0.33	-	--	-	-	-	-
UNIGENE0002121	11	0	-0.13	-1.81	0.18	-	PREDICTED: NACHT, LRR and PYD domains-containing protein 12-like, partial [Cyprinus carpio]	-	-	-	-
UNIGENE0002156	11	0	-0.47	-1.37	-0.08	NLRP12	PREDICTED: NACHT, LRR and PYD domains-containing protein 12-like, partial [Sinocyclocheilus rhinocerous]	-	-	-	-
UNIGENE0002157	11	0	-0.5	-2.07	-0.04	NLRC3	PREDICTED: protein NLRC3-like, partial [Cyprinus carpio]	-	-	-	-
UNIGENE0002206	11	0	1.96	-5.09	1	-	PREDICTED: ATP-dependent DNA helicase Q1-like [Nothobranchius furzeri]	-	-	-	-
UNIGENE0002305	11	0	0.85	-1.79	0.39	-	--	-	-	-	-
UNIGENE0002427	11	0	0.59	-0.71	-0.04	-	--	-	-	-	-
UNIGENE0002437	11	0	0	-1.35	-0.48	-	--	-	-	-	-
UNIGENE0002471	11	0	0.51	-0.94	0.53	-	--	-	-	-	-
UNIGENE0002498	11	0	0.28	-1.07	0.01	-	hypothetical protein cypCar_00021484 [Cyprinus carpio]	-	-	-	-
UNIGENE0002554	11	0	0.73	-0.97	0.25	ZNF93	PREDICTED: gastrula zinc finger protein XlCGF7.1-like isoform X2 [Sinocyclocheilus rhinocerous]	-	-	-	-
UNIGENE0002564	11	0	1.07	-1.96	0.53	-	--	-	-	-	-
UNIGENE0002627	11	0	-0.15	-1.08	0.53	-	--	-	-	-	-
UNIGENE0002653	11	0	0.51	-0.86	-0.1	-	--	-	-	-	-
UNIGENE0002686	11	0	-0.46	-2.22	-0.12	Nlrc3	PREDICTED: protein NLRC3-like isoform X3 [Cyprinus carpio]	-	-	-	-
UNIGENE0002727	11	0	0.34	-1.89	-0.28	-	--	-	-	-	-
UNIGENE0002735	11	0	0.61	-1.69	0.28	-	hypothetical protein EH28_07025 [Larimichthys crocea]	-	-	-	-
UNIGENE0002783	11	0	-0.26	-1.5	-0.17	LY86	PREDICTED: lymphocyte antigen 86-like [Sinocyclocheilus anshuiensis]	-	-	-	-
UNIGENE0002795	11	0	1	-1.36	-0.26	-	--	-	-	-	-
UNIGENE0002901	11	0	2.96	-4.64	0.86	Trim31	PREDICTED: tripartite motif-containing protein 35-like [Sinocyclocheilus grahami]	-	GO:0044464//cell part;GO:0005623//cell	GO:0043167//ion binding;GO:0005488//binding;GO:0043169//cation binding;GO:0046914//transition metal ion binding;GO:0046872//metal ion binding	-
UNIGENE0002958	11	0	0.38	-1.63	0.2	-	--	-	-	-	-
UNIGENE0003062	11	0	-0.2	-0.9	0.49	-	PREDICTED: putative nuclease HARBI1, partial [Pygocentrus nattereri]	-	-	-	-
UNIGENE0003079	11	0	0.29	-1.22	-0.02	-	--	-	-	-	-
UNIGENE0003109	11	0	0.5	-2.59	-0.42	-	--	-	-	-	-
UNIGENE0003224	11	0	0.56	-1.09	-0.12	-	hypothetical protein cypCar_00048458, partial [Cyprinus carpio]	-	-	-	-
UNIGENE0003230	11	0	0.31	-0.89	-0.17	-	--	-	-	-	-
UNIGENE0003240	11	0	0.79	-1.02	0.42	-	--	-	-	-	-
UNIGENE0003244	11	0	0.29	-1.02	-0.37	-	--	-	-	-	-
UNIGENE0003257	11	0	0.02	-7.88	-0.66	Rnh1	PREDICTED: ribonuclease inhibitor-like, partial [Cyprinus carpio]	-	-	-	-
UNIGENE0003276	11	0	-0.06	-1.76	-0.64	-	--	-	-	-	-
UNIGENE0003317	11	0	-0.25	-2.25	-0.05	-	--	-	-	-	-
UNIGENE0003415	11	0	0.11	-0.74	0.54	-	--	-	-	-	-
UNIGENE0003456	11	0	0.78	-1.84	0.47	DFNA5	PREDICTED: non-syndromic hearing impairment protein 5-like [Sinocyclocheilus rhinocerous]	-	-	-	-
UNIGENE0003497	11	0	-0.26	-1.48	0.05	Trim16	PREDICTED: tripartite motif-containing protein 16-like [Sinocyclocheilus anshuiensis]	-	-	-	-
UNIGENE0003517	11	0	0.13	-2.08	-0.63	-	--	-	-	-	-
UNIGENE0003526	11	0	0.36	-2.39	-0.01	-	--	-	-	-	-
UNIGENE0003530	11	0	0.37	-0.71	-0.01	-	--	-	-	-	-
UNIGENE0003548	11	0	0.56	-1.06	0.26	Il2rb	PREDICTED: interleukin-2 receptor subunit beta-like [Sinocyclocheilus anshuiensis]	ko04144//Endocytosis//Transport and catabolism//Cellular Processes;ko04060//Cytokine-cytokine receptor interaction//Signaling molecules and interaction//Environmental Information Processing;ko04630//Jak-STAT signaling pathway//Signal transduction//Environmental Information Processing	-	-	-
UNIGENE0003609	11	0	1.03	-1.31	-0.07	-	PREDICTED: protein NLRC3-like [Cyprinus carpio]	-	-	GO:0005488//binding;GO:0097159//organic cyclic compound binding;GO:1901363//heterocyclic compound binding;GO:0036094//small molecule binding	-
UNIGENE0003616	11	0	0.39	-4.35	0.91	-	--	-	-	-	-
UNIGENE0003621	11	0	0.87	-0.97	0.33	-	--	-	-	-	-
UNIGENE0003646	11	0	0.52	-0.86	0.48	-	--	-	-	-	-
UNIGENE0003655	11	0	0.52	-0.64	-0.05	-	--	-	-	-	-
UNIGENE0003729	11	0	0.47	-1.45	-0.25	-	--	-	-	-	-
UNIGENE0003738	11	0	0.12	-1.12	0.1	pxn1	PREDICTED: pentraxin fusion protein-like [Sinocyclocheilus anshuiensis]	-	-	-	-
UNIGENE0003843	11	0	-0.02	-1.09	0.19	TIC214	PREDICTED: melanoma-associated antigen C1-like [Homo sapiens]	-	GO:0005623//cell;GO:0044424//intracellular part;GO:0005622//intracellular;GO:0044464//cell part	-	-
UNIGENE0003844	11	0	0.1	-1.86	-0.1	-	--	-	-	-	-
UNIGENE0003866	11	0	0.76	-3.17	1.14	SLC22A7	PREDICTED: solute carrier family 22 member 7-like isoform X2 [Sinocyclocheilus grahami]	-	-	-	-
UNIGENE0003873	11	0	-0.44	-1.48	-0.13	-	--	-	-	-	-
UNIGENE0003883	11	0	0.27	-1	-0.05	-	--	-	-	-	-
UNIGENE0003904	11	0	-0.08	-1.29	1.2	-	--	-	-	-	-
UNIGENE0003907	11	0	-0.31	-2.17	-0.59	Fcer1g	PREDICTED: high affinity immunoglobulin epsilon receptor subunit gamma-like isoform X2 [Cyprinus carpio]	-	-	-	-
UNIGENE0003923	11	0	0.5	-0.97	0.05	SMCO3	PREDICTED: single-pass membrane and coiled-coil domain-containing protein 3-like [Sinocyclocheilus rhinocerous]	-	-	-	-
UNIGENE0003963	11	0	0.47	-1.06	-0.01	-	--	-	-	-	-
UNIGENE0004042	11	0	0.83	-2.22	-0.11	-	--	-	-	-	-
UNIGENE0004072	11	0	-0.33	-2.29	0.01	Ccl19	PREDICTED: monocyte chemotactic protein 1B-like [Sinocyclocheilus anshuiensis]	ko04060//Cytokine-cytokine receptor interaction//Signaling molecules and interaction//Environmental Information Processing;ko04062//Chemokine signaling pathway//Immune system//Organismal Systems;ko04668//TNF signaling pathway//Signal transduction//Environmental Information Processing	GO:0005576//extracellular region	GO:0005125//cytokine activity;GO:0005102//receptor binding;GO:0005515//protein binding;GO:0005488//binding	GO:0007389//pattern specification process;GO:0044707//single-multicellular organism process;GO:0007275//multicellular organism development;GO:0032502//developmental process;GO:0003002//regionalization;GO:0032501//multicellular organismal process;GO:0044767//single-organism developmental process;GO:0044699//single-organism process
UNIGENE0004136	11	0	-0.07	-0.95	0.28	DLC1	PREDICTED: rho GTPase-activating protein 7-like isoform X1 [Sinocyclocheilus rhinocerous]	-	-	-	-
UNIGENE0004144	11	0	0.39	-0.78	0	-	--	-	-	-	-
UNIGENE0004153	11	0	0.09	-1.71	-0.74	-	--	-	-	-	-
UNIGENE0004156	11	0	-0.02	-0.9	0.35	HDAC4	PREDICTED: histone deacetylase 7-like [Sinocyclocheilus rhinocerous]	-	-	-	-
UNIGENE0004165	11	0	0.17	-0.91	0.63	-	--	-	-	-	-
UNIGENE0004185	11	0	0.29	-1.2	0.52	-	--	-	-	-	-
UNIGENE0004287	11	0	-0.36	-1.19	0.04	-	PREDICTED: apoptosis-associated speck-like protein containing a CARD [Sinocyclocheilus grahami]	-	-	-	-
UNIGENE0004334	11	0	0.72	-1.23	-0.32	-	--	-	-	-	-
UNIGENE0004342	11	0	-0.35	-0.95	0.3	-	--	-	-	-	-
UNIGENE0004348	11	0	-0.24	-1.34	-0.24	MED26	PREDICTED: mediator of RNA polymerase II transcription subunit 26-like [Sinocyclocheilus rhinocerous]	-	-	-	-
UNIGENE0004394	11	0	0.21	-2.08	1.9	-	--	-	-	-	-
UNIGENE0004475	11	0	0.74	-1.26	1.09	MXRA5	PREDICTED: matrix-remodeling-associated protein 5-like [Sinocyclocheilus rhinocerous]	-	-	-	-
UNIGENE0004487	11	0	0.42	-1.43	-0.25	-	PREDICTED: tripartite motif-containing protein 35-like [Sinocyclocheilus grahami]	-	-	-	-
UNIGENE0004537	11	0	1.17	-1.3	0.97	-	immunoglobulin mu heavy chain IgM [Labeo rohita]	ko04020//Calcium signaling pathway//Signal transduction//Environmental Information Processing;ko04145//Phagosome//Transport and catabolism//Cellular Processes;ko04672//Intestinal immune network for IgA production//Immune system//Organismal Systems	-	-	-
UNIGENE0004581	11	0	0.44	-0.83	0.57	-	--	-	-	-	-
UNIGENE0004607	11	0	0.3	-1.79	-0.56	-	--	-	-	-	-
UNIGENE0004690	11	0	0.79	-1.87	0.61	SMCO3	PREDICTED: single-pass membrane and coiled-coil domain-containing protein 3-like [Sinocyclocheilus anshuiensis]	-	-	-	-
UNIGENE0004696	11	0	0.6	-0.88	0.78	ARHGAP30	PREDICTED: rho GTPase-activating protein 30-like [Sinocyclocheilus anshuiensis]	-	-	-	-
UNIGENE0004723	11	0	0.4	-1.09	1.12	-	PREDICTED: CMRF35-like molecule 1 [Sinocyclocheilus grahami]	-	-	-	-
UNIGENE0004755	11	0	-0.06	-1.31	1.01	-	hypothetical protein cypCar_00037859 [Cyprinus carpio]	-	-	-	-
UNIGENE0004780	11	0	-0.21	-1.39	0.32	-	--	-	-	-	-
UNIGENE0004804	11	0	-0.14	-1.58	-0.21	c3ar1	PREDICTED: C3a anaphylatoxin chemotactic receptor-like [Sinocyclocheilus rhinocerous]	-	-	-	-
UNIGENE0004917	11	0	0.13	-0.95	0.06	Trim16	PREDICTED: tripartite motif-containing protein 16-like protein [Sinocyclocheilus grahami]	-	-	-	-
UNIGENE0004925	11	0	0.23	-1.77	-0.28	TRIM16L	PREDICTED: tripartite motif-containing protein 16-like, partial [Sinocyclocheilus rhinocerous]	-	-	-	-
UNIGENE0004928	11	0	0.3	-0.91	0.11	TRIM29	PREDICTED: tripartite motif-containing protein 16-like [Sinocyclocheilus grahami]	-	-	-	-
UNIGENE0004961	11	0	0.69	-1.03	-0.15	-	--	-	-	-	-
UNIGENE0004965	11	0	-0.27	-1.44	0.27	-	--	-	-	-	-
UNIGENE0004993	11	0	0.88	-2.27	0.04	-	--	-	-	-	-
UNIGENE0005018	11	0	-0.25	-1.43	0.66	-	--	-	-	-	-
UNIGENE0005060	11	0	-0.1	-3.21	0.23	GIMAP8	PREDICTED: GTPase IMAP family member 4-like isoform X2 [Sinocyclocheilus rhinocerous]	-	-	-	-
UNIGENE0005137	11	0	0.36	-1.09	-0.01	-	PREDICTED: stonustoxin subunit beta-like [Cyprinus carpio]	-	-	-	-
UNIGENE0005159	11	0	1.12	-1.12	0.21	-	--	-	-	-	-
UNIGENE0005163	11	0	2.6	-6.8	1.1	Lamb3	PREDICTED: laminin subunit beta-3 [Sinocyclocheilus anshuiensis]	ko04510//Focal adhesion//Cellular commiunity//Cellular Processes;ko04512//ECM-receptor interaction//Signaling molecules and interaction//Environmental Information Processing;ko04151//PI3K-Akt signaling pathway//Signal transduction//Environmental Information Processing	GO:0043256//laminin complex;GO:0005604//basement membrane;GO:0005578//proteinaceous extracellular matrix;GO:0032991//macromolecular complex;GO:0005605//basal lamina;GO:0031012//extracellular matrix;GO:0044421//extracellular region part;GO:0043234//protein complex;GO:0005576//extracellular region;GO:0044420//extracellular matrix component	GO:0005515//protein binding;GO:0005488//binding	GO:0048869//cellular developmental process;GO:0032502//developmental process;GO:0009987//cellular process;GO:0044763//single-organism cellular process;GO:0044767//single-organism developmental process;GO:0045444//fat cell differentiation;GO:0044699//single-organism process;GO:0030154//cell differentiation
UNIGENE0005171	11	0	0.42	-4.43	0.05	-	--	-	-	-	-
UNIGENE0005285	11	0	0.79	-1.7	-0.55	-	--	-	-	-	-
UNIGENE0005299	11	0	-0.25	-3.07	-0.87	-	--	-	-	-	-
UNIGENE0005311	11	0	0.51	-1.56	1.75	pyx	PREDICTED: transient receptor potential channel pyrexia-like [Sinocyclocheilus rhinocerous]	-	-	-	-
UNIGENE0005364	11	0	0.8	-0.89	0.48	-	hypothetical protein cypCar_00002341 [Cyprinus carpio]	-	-	-	-
UNIGENE0005416	11	0	0.34	-8.7	0.06	-	--	-	-	-	-
UNIGENE0005476	11	0	-0.06	-2.59	1.08	-	--	-	-	-	-
UNIGENE0005542	11	0	0.74	-1.05	-0.26	-	--	-	-	-	-
UNIGENE0005566	11	0	-0.97	-8.68	-0.58	infB	PREDICTED: circumsporozoite protein-like isoform X2 [Salmo salar]	-	-	-	-
UNIGENE0005605	11	0	0.28	-1.24	0.3	-	--	-	-	-	-
UNIGENE0005684	11	0	-0.29	-2.92	-0.12	-	--	-	-	-	-
UNIGENE0005686	11	0	0.49	-0.94	0.31	-	--	-	-	-	-
UNIGENE0005711	11	0	0.55	-0.8	0.06	-	--	-	-	-	-
UNIGENE0005762	11	0	0.19	-0.74	0.48	Malt1	PREDICTED: mucosa-associated lymphoid tissue lymphoma translocation protein 1 homolog [Sinocyclocheilus grahami]	-	-	-	GO:0010467//gene expression;GO:0019538//protein metabolic process;GO:0016485//protein processing;GO:0044238//primary metabolic process;GO:0051604//protein maturation;GO:0006508//proteolysis;GO:0008152//metabolic process;GO:0071704//organic substance metabolic process;GO:0043170//macromolecule metabolic process
UNIGENE0005807	11	0	0.1	-1.12	0.18	Htra3	PREDICTED: serine protease HTRA3-like [Sinocyclocheilus rhinocerous]	-	-	GO:0005515//protein binding;GO:0016787//hydrolase activity;GO:0070011//peptidase activity, acting on L-amino acid peptides;GO:0008233//peptidase activity;GO:0003824//catalytic activity;GO:0004175//endopeptidase activity;GO:0005488//binding;GO:0019838//growth factor binding	GO:0019538//protein metabolic process;GO:0044238//primary metabolic process;GO:0071704//organic substance metabolic process;GO:0043170//macromolecule metabolic process;GO:0051604//protein maturation;GO:0016485//protein processing;GO:0008152//metabolic process;GO:0010467//gene expression;GO:0006508//proteolysis
UNIGENE0005835	11	0	-0.64	-2.03	0.49	cryS	PREDICTED: crystal protein-like [Sinocyclocheilus grahami]	-	-	-	-
UNIGENE0005836	11	0	0.47	-1.91	-0.66	-	--	-	-	-	-
UNIGENE0005862	11	0	0.22	-3.2	1.8	-	PREDICTED: protein NLRC5-like [Sinocyclocheilus rhinocerous]	-	-	-	-
UNIGENE0005986	11	0	-0.36	-1.5	0.49	-	--	-	-	-	-
UNIGENE0006007	11	0	-0.6	-2.76	0.65	PRSS8	PREDICTED: LOW QUALITY PROTEIN: serine protease 27-like [Cyprinus carpio]	-	-	GO:0003824//catalytic activity;GO:0004175//endopeptidase activity;GO:0070011//peptidase activity, acting on L-amino acid peptides;GO:0008233//peptidase activity;GO:0016787//hydrolase activity	GO:0019538//protein metabolic process;GO:0043170//macromolecule metabolic process;GO:0051604//protein maturation;GO:0016485//protein processing;GO:0044238//primary metabolic process;GO:0071704//organic substance metabolic process;GO:0010467//gene expression;GO:0006508//proteolysis;GO:0008152//metabolic process
UNIGENE0006126	11	0	0.59	-2.87	0.03	-	--	-	-	-	-
UNIGENE0006138	11	0	0.17	-4.49	0.46	cx32.2	PREDICTED: gap junction Cx32.2 protein-like [Sinocyclocheilus rhinocerous]	-	GO:0031224//intrinsic component of membrane;GO:0016020//membrane;GO:0030054//cell junction;GO:0005911//cell-cell junction;GO:0044425//membrane part	-	GO:0044699//single-organism process;GO:0009987//cellular process;GO:0044763//single-organism cellular process
UNIGENE0006177	11	0	0.99	-1.7	1.38	-	hypothetical protein cypCar_00048268 [Cyprinus carpio]	-	-	-	-
UNIGENE0006324	11	0	0.95	-2.28	0.68	-	--	-	-	-	-
UNIGENE0006356	11	0	0.81	-1.8	0.46	-	--	-	-	-	-
UNIGENE0006399	11	0	-0.42	-1.31	0.07	HSPB1	PREDICTED: heat shock protein beta-1-like [Cyprinus carpio]	ko04010//MAPK signaling pathway//Signal transduction//Environmental Information Processing;ko04370//VEGF signaling pathway//Signal transduction//Environmental Information Processing	GO:0005622//intracellular;GO:0043231//intracellular membrane-bounded organelle;GO:0044464//cell part;GO:0044424//intracellular part;GO:0043229//intracellular organelle;GO:0043227//membrane-bounded organelle;GO:0005623//cell;GO:0043226//organelle	-	GO:0006950//response to stress;GO:0042221//response to chemical;GO:0050896//response to stimulus
UNIGENE0006429	11	0	-0.88	-2.26	-0.17	-	--	-	-	-	-
UNIGENE0006446	11	0	0.46	-0.64	0.36	-	PREDICTED: AP-3 complex subunit beta-2 [Picoides pubescens]	-	-	-	-
UNIGENE0006466	11	0	0.26	-1.12	0.28	-	--	-	-	-	-
UNIGENE0006473	11	0	0.11	-1.47	0.11	-	interleukin-10 receptor 1 [Ctenopharyngodon idella]	ko04060//Cytokine-cytokine receptor interaction//Signaling molecules and interaction//Environmental Information Processing;ko04630//Jak-STAT signaling pathway//Signal transduction//Environmental Information Processing	GO:0016020//membrane;GO:0031224//intrinsic component of membrane;GO:0044425//membrane part	GO:0038023//signaling receptor activity;GO:0004888//transmembrane signaling receptor activity;GO:0060089//molecular transducer activity;GO:0099600//transmembrane receptor activity;GO:0004872//receptor activity;GO:0004871//signal transducer activity	GO:0044699//single-organism process;GO:0050789//regulation of biological process;GO:0050794//regulation of cellular process;GO:0050896//response to stimulus;GO:0023052//signaling;GO:0065007//biological regulation;GO:0007166//cell surface receptor signaling pathway;GO:0044700//single organism signaling;GO:0044763//single-organism cellular process;GO:0007165//signal transduction;GO:0009987//cellula…
UNIGENE0006481	11	0	-0.05	-1.2	-0.45	-	PREDICTED: adhesion G protein-coupled receptor E1-like [Danio rerio]	-	-	-	-
UNIGENE0006542	11	0	-0.16	-1.74	-0.61	CD22	PREDICTED: sialoadhesin-like [Cyprinus carpio]	-	-	-	-
UNIGENE0006545	11	0	-0.04	-3.39	-0.7	-	--	-	-	-	-
UNIGENE0006572	11	0	0.69	-3.53	0.21	-	PREDICTED: neuron navigator 3-like [Poecilia mexicana]	ko03013//RNA transport//Translation//Genetic Information Processing	-	-	-
UNIGENE0006586	11	0	-0.3	-1.69	-0.04	-	RNA-directed DNA polymerase from mobile element jockey [Larimichthys crocea]	-	-	-	-
UNIGENE0006638	11	0	0.74	-0.68	0.22	ZNF185	PREDICTED: proteoglycan 4-like [Sinocyclocheilus anshuiensis]	-	-	-	-
UNIGENE0006640	11	0	0.63	-1.26	0.69	-	--	-	-	-	-
UNIGENE0006695	11	0	0.03	-2.51	-0.19	-	PREDICTED: uncharacterized protein LOC100536946 [Danio rerio]	-	-	-	-
UNIGENE0006794	11	0	0.8	-0.96	-0.07	-	--	-	-	-	-
UNIGENE0006829	11	0	0.29	-1.65	0.07	DNASE2B	PREDICTED: deoxyribonuclease-2-beta-like [Sinocyclocheilus anshuiensis]	ko04142//Lysosome//Transport and catabolism//Cellular Processes	-	-	-
UNIGENE0006840	11	0	1.6	-2.91	0.92	-	--	-	-	-	-
UNIGENE0006927	11	0	0.27	-1.58	-0.47	-	--	-	-	-	-
UNIGENE0006928	11	0	-0.11	-2.38	-0.38	-	--	-	-	-	-
UNIGENE0006933	11	0	0.07	-3.66	-0.54	-	--	-	-	-	-
UNIGENE0006949	11	0	1.01	-0.81	0.26	c3ar1	PREDICTED: C3a anaphylatoxin chemotactic receptor-like [Sinocyclocheilus grahami]	-	-	-	-
UNIGENE0006963	11	0	-0.09	-1.82	-0.12	-	--	-	-	-	-
UNIGENE0006989	11	0	0.49	-1.14	0.31	-	--	-	-	-	-
UNIGENE0007002	11	0	-0.46	-2.76	-0.71	-	--	-	-	-	-
UNIGENE0007014	11	0	0.79	-2.41	1.28	Lrrc15	PREDICTED: leucine-rich repeat-containing protein 15-like [Sinocyclocheilus rhinocerous]	-	-	-	-
UNIGENE0007053	11	0	0.2	-1.99	0.48	-	--	-	-	-	-
UNIGENE0007069	11	0	-0.31	-1.62	0.28	-	PREDICTED: NACHT, LRR and PYD domains-containing protein 3-like, partial [Sinocyclocheilus rhinocerous]	-	-	-	-
UNIGENE0007123	11	0	0.22	-0.83	-0.01	Pigr	PREDICTED: CMRF35-like molecule 1 [Sinocyclocheilus grahami]	-	-	-	-
UNIGENE0007195	11	0	0.37	-1.16	0.09	-	PREDICTED: LOW QUALITY PROTEIN: retinitis pigmentosa 1-like 1 protein [Sinocyclocheilus anshuiensis]	-	-	-	-
UNIGENE0007252	11	0	0.7	-2.58	0.75	-	--	-	-	-	-
UNIGENE0007253	11	0	-0.06	-1.13	0.56	-	--	-	-	-	-
UNIGENE0007268	11	0	0.89	-3.45	-0.69	-	immunoglobulin light chain, partial [Cyprinus carpio]	-	-	-	-
UNIGENE0007271	11	0	-0.11	-1.62	0.49	IGKV4-1	immunoglobulin light chain L3.3 [Ctenopharyngodon idella]	-	-	-	-
UNIGENE0007273	11	0	0.73	-0.83	0.06	GIMAP7	PREDICTED: GTPase IMAP family member 8-like [Sinocyclocheilus rhinocerous]	-	-	-	-
UNIGENE0007287	11	0	0.31	-0.82	0.02	DNASE1L3	PREDICTED: deoxyribonuclease gamma-like isoform X1 [Sinocyclocheilus rhinocerous]	-	-	GO:0016788//hydrolase activity, acting on ester bonds;GO:0003824//catalytic activity;GO:0004518//nuclease activity;GO:0016787//hydrolase activity	GO:0008152//metabolic process;GO:0006259//DNA metabolic process;GO:0006807//nitrogen compound metabolic process;GO:0006139//nucleobase-containing compound metabolic process;GO:1901360//organic cyclic compound metabolic process;GO:0006725//cellular aromatic compound metabolic process;GO:0044260//cellular macromolecule metabolic process;GO:0044238//primary metabolic process;GO:0090304//nucleic acid…
UNIGENE0007344	11	0	0.06	-2.08	0.04	-	--	-	-	-	-
UNIGENE0007365	11	0	0.29	-1.26	0.01	-	reverse transcriptase [Danio rerio]	-	-	-	-
UNIGENE0007398	11	0	-0.01	-2.45	0.06	CSF3R	PREDICTED: granulocyte colony-stimulating factor receptor-like [Sinocyclocheilus rhinocerous]	ko04060//Cytokine-cytokine receptor interaction//Signaling molecules and interaction//Environmental Information Processing;ko04630//Jak-STAT signaling pathway//Signal transduction//Environmental Information Processing	-	-	GO:0048869//cellular developmental process;GO:0002376//immune system process;GO:0032502//developmental process;GO:0030154//cell differentiation;GO:0044707//single-multicellular organism process;GO:0002520//immune system development;GO:0032501//multicellular organismal process;GO:0048513//animal organ development;GO:0030851//granulocyte differentiation;GO:0002573//myeloid leukocyte differentiation…
UNIGENE0007485	11	0	0.51	-0.57	-0.06	-	--	-	-	-	-
UNIGENE0007557	11	0	1.95	-3.68	3.92	-	PREDICTED: myosin-9-like [Oryzias latipes]	-	-	-	-
UNIGENE0007637	11	0	-0.4	-2.81	1.53	-	--	-	-	-	-
UNIGENE0007677	11	0	0.17	-2.3	-0.68	-	--	-	-	-	-
UNIGENE0007678	11	0	-3.29	-7.85	0.19	-	--	-	-	-	-
UNIGENE0007696	11	0	1.01	-1.09	0.73	-	--	-	-	-	-
UNIGENE0007788	11	0	0.03	-1.34	-0.09	Shisa4	PREDICTED: protein shisa-5-like [Cyprinus carpio]	ko04115//p53 signaling pathway//Cell growth and death//Cellular Processes	-	-	-
UNIGENE0007882	11	0	0.54	-1.51	-0.36	-	--	-	-	-	-
UNIGENE0007929	11	0	0.13	-1.09	0.35	TNFSF13B	TNF13b [Ctenopharyngodon idella]	ko04060//Cytokine-cytokine receptor interaction//Signaling molecules and interaction//Environmental Information Processing;ko04672//Intestinal immune network for IgA production//Immune system//Organismal Systems	GO:0005576//extracellular region;GO:0044421//extracellular region part	GO:0005126//cytokine receptor binding;GO:0005515//protein binding;GO:0032813//tumor necrosis factor receptor superfamily binding;GO:0005102//receptor binding;GO:0005488//binding	-
UNIGENE0007961	11	0	1.29	-7.23	1.63	-	--	-	-	-	-
UNIGENE0007962	11	0	2.36	-5.15	4.06	-	--	-	-	-	-
UNIGENE0007963	11	0	2.84	-7.78	3.53	-	--	-	-	-	-
UNIGENE0007987	11	0	0.41	-1.28	0.7	-	--	-	-	-	-
UNIGENE0008071	11	0	0.36	-1.18	0.89	-	--	-	-	-	-
UNIGENE0008103	11	0	0.59	-1.21	0.05	-	--	-	-	-	-
UNIGENE0008114	11	0	0.84	-1.58	1.54	SLC13A3	PREDICTED: solute carrier family 13 member 3-like [Sinocyclocheilus rhinocerous]	-	-	-	GO:0044763//single-organism cellular process;GO:0044699//single-organism process;GO:0009987//cellular process
UNIGENE0008127	11	0	-0.31	-2.58	0.89	-	PREDICTED: beta-microseminoprotein-like [Cyprinus carpio]	-	-	-	-
UNIGENE0008171	11	0	-0.82	-3.05	-0.29	Irf4	interferon regulatory factor 4-like [Ctenopharyngodon idella]	-	-	-	-
UNIGENE0008184	11	0	-0.21	-0.98	0.26	-	--	-	-	-	-
UNIGENE0008247	11	0	-0.36	-1.57	-0.39	C1ql3	PREDICTED: complement C1q-like protein 4 [Sinocyclocheilus rhinocerous]	-	-	-	-
UNIGENE0008269	11	0	0.35	-0.95	0.44	-	--	-	-	-	-
UNIGENE0008338	11	0	-0.34	-1.16	-0.04	Skor2	PREDICTED: SKI family transcriptional corepressor 2-like isoform X1 [Sinocyclocheilus rhinocerous]	-	GO:0044424//intracellular part;GO:0043229//intracellular organelle;GO:0005622//intracellular;GO:0044464//cell part;GO:0043226//organelle;GO:0043231//intracellular membrane-bounded organelle;GO:0043227//membrane-bounded organelle;GO:0005623//cell	GO:0005488//binding;GO:0005515//protein binding	GO:0044763//single-organism cellular process;GO:0071495//cellular response to endogenous stimulus;GO:0071363//cellular response to growth factor stimulus;GO:0070848//response to growth factor;GO:0007154//cell communication;GO:0065007//biological regulation;GO:0044700//single organism signaling;GO:0042221//response to chemical;GO:0019222//regulation of metabolic process;GO:0050794//regulation of c…
UNIGENE0008429	11	0	0.09	-2.34	-0.56	-	--	-	-	-	-
UNIGENE0008531	11	0	0.65	-0.63	0.04	-	PREDICTED: uncharacterized protein LOC106907987 [Poecilia mexicana]	-	-	-	-
UNIGENE0008558	11	0	0.46	-1.12	0.26	-	--	-	-	-	-
UNIGENE0008628	11	0	0.65	-1.77	0.12	-	--	-	-	-	-
UNIGENE0008636	11	0	0.51	-0.92	0.78	-	PREDICTED: uncharacterized protein LOC568178 isoform X1 [Danio rerio]	-	-	-	-
UNIGENE0008709	11	0	0.22	-0.97	0.18	IFNG	interferon gamma 2a [Ctenopharyngodon idella]	ko04060//Cytokine-cytokine receptor interaction//Signaling molecules and interaction//Environmental Information Processing;ko04630//Jak-STAT signaling pathway//Signal transduction//Environmental Information Processing;ko04350//TGF-beta signaling pathway//Signal transduction//Environmental Information Processing;ko03050//Proteasome//Folding, sorting and degradation//Genetic Information Processing;…	-	GO:0005126//cytokine receptor binding;GO:0005102//receptor binding;GO:0005515//protein binding;GO:0005488//binding	GO:0009607//response to biotic stimulus;GO:0050896//response to stimulus;GO:0009605//response to external stimulus;GO:0002376//immune system process;GO:0009617//response to bacterium;GO:0043207//response to external biotic stimulus;GO:0006955//immune response;GO:0051707//response to other organism;GO:0051704//multi-organism process
UNIGENE0008718	11	0	0.17	-2.53	-0.56	-	--	-	-	-	-
UNIGENE0008762	11	0	-0.38	-3.01	-0.55	-	--	-	-	-	-
UNIGENE0008790	11	0	-0.05	-0.97	0.26	-	--	-	-	-	-
UNIGENE0008862	11	0	0.36	-0.75	0.29	-	PREDICTED: uncharacterized protein LOC109060254 isoform X2 [Cyprinus carpio]	-	-	-	-
UNIGENE0008965	11	0	0.04	-0.87	0.33	Cd2	PREDICTED: T-cell surface antigen CD2-like isoform X2 [Sinocyclocheilus grahami]	ko04514//Cell adhesion molecules (CAMs)//Signaling molecules and interaction//Environmental Information Processing	-	-	-
UNIGENE0009017	11	0	0.33	-0.77	0.72	-	--	-	-	-	-
UNIGENE0009078	11	0	0.71	-0.91	0.69	-	PREDICTED: receptor-type tyrosine-protein phosphatase C-like [Sinocyclocheilus anshuiensis]	-	-	-	-
UNIGENE0009108	11	0	0.19	-1.69	0.93	-	--	-	-	-	-
UNIGENE0009127	11	0	-0.93	-2.48	0.22	-	--	-	-	-	-
UNIGENE0009214	11	0	0.21	-0.94	0.4	PARVG	PREDICTED: gamma-parvin isoform X1 [Sinocyclocheilus rhinocerous]	ko04510//Focal adhesion//Cellular commiunity//Cellular Processes	-	-	-
UNIGENE0009312	11	0	0.8	-3.68	-0.5	-	--	-	-	-	-
UNIGENE0009351	11	0	0.34	-1.41	0.32	-	--	-	-	-	-
UNIGENE0009370	11	0	0.32	-0.65	0.73	-	--	-	-	-	-
UNIGENE0009402	11	0	-0.12	-2.47	-0.17	CCR7	PREDICTED: C-C chemokine receptor type 7-like [Sinocyclocheilus grahami]	ko04060//Cytokine-cytokine receptor interaction//Signaling molecules and interaction//Environmental Information Processing;ko04672//Intestinal immune network for IgA production//Immune system//Organismal Systems	GO:0031224//intrinsic component of membrane;GO:0016020//membrane;GO:0044425//membrane part	GO:0008528//G-protein coupled peptide receptor activity;GO:0004872//receptor activity;GO:0001653//peptide receptor activity;GO:0038023//signaling receptor activity;GO:0004871//signal transducer activity;GO:0001637//G-protein coupled chemoattractant receptor activity;GO:0099600//transmembrane receptor activity;GO:0004888//transmembrane signaling receptor activity;GO:0004930//G-protein coupled rece…	GO:0044699//single-organism process;GO:0009987//cellular process;GO:0044763//single-organism cellular process;GO:0042221//response to chemical;GO:0050896//response to stimulus;GO:0007154//cell communication
UNIGENE0009419	11	0	0.47	-1.34	0.19	-	--	-	-	-	-
UNIGENE0009442	11	0	0.17	-2.69	-0.21	Olfm4	PREDICTED: olfactomedin-4-like [Sinocyclocheilus anshuiensis]	-	-	-	-
UNIGENE0009481	11	0	0.13	-1.1	-0.31	AFF3	PREDICTED: AF4/FMR2 family member 3-like [Sinocyclocheilus grahami]	-	-	-	-
UNIGENE0009544	11	0	0.36	-1.89	-0.26	-	--	-	-	-	-
UNIGENE0009772	11	0	0.23	-0.85	0.55	ASAP1	PREDICTED: arf-GAP with SH3 domain, ANK repeat and PH domain-containing protein 1-like isoform X3 [Sinocyclocheilus grahami]	ko04144//Endocytosis//Transport and catabolism//Cellular Processes	-	-	-
UNIGENE0009811	11	0	0.06	-1.12	-0.25	GVINP1	PREDICTED: interferon-induced very large GTPase 1-like [Sinocyclocheilus anshuiensis]	-	-	-	-
UNIGENE0009812	11	0	0.63	-0.76	0.34	GVINP1	PREDICTED: interferon-induced very large GTPase 1-like [Sinocyclocheilus grahami]	-	-	-	-
UNIGENE0009818	11	0	-0.18	-1.58	0.16	IRF8	interferon regulatory factor 8 [Ctenopharyngodon idella]	-	-	GO:0001067//regulatory region nucleic acid binding;GO:0005488//binding;GO:1901363//heterocyclic compound binding;GO:0097159//organic cyclic compound binding;GO:0003676//nucleic acid binding	GO:0046483//heterocycle metabolic process;GO:0097659//nucleic acid-templated transcription;GO:0006725//cellular aromatic compound metabolic process;GO:0002761//regulation of myeloid leukocyte differentiation;GO:0032501//multicellular organismal process;GO:0048513//animal organ development;GO:0043170//macromolecule metabolic process;GO:1902105//regulation of leukocyte differentiation;GO:0010467//g…
UNIGENE0009822	11	0	0.07	-0.94	-0.27	MCTP1	PREDICTED: multiple C2 and transmembrane domain-containing protein 1-like isoform X2 [Sinocyclocheilus rhinocerous]	-	-	-	-
UNIGENE0009855	11	0	-0.02	-1.09	0.75	-	PREDICTED: NAC-alpha domain-containing protein 1 isoform X2 [Pygocentrus nattereri]	-	-	-	-
UNIGENE0009903	11	0	-0.66	-1.78	0.6	Bnc1	PREDICTED: zinc finger protein basonuclin-1 [Cyprinus carpio]	-	-	-	-
UNIGENE0009952	11	0	0.5	-0.9	0.19	B2M	PREDICTED: zmp:0000001138 isoform X1 [Danio rerio]	ko04612//Antigen processing and presentation//Immune system//Organismal Systems	-	-	-
UNIGENE0009953	11	0	0.33	-1.14	0.32	Tgfbr1	PREDICTED: activin receptor type-1C-like isoform X2 [Sinocyclocheilus grahami]	ko04010//MAPK signaling pathway//Signal transduction//Environmental Information Processing;ko04144//Endocytosis//Transport and catabolism//Cellular Processes;ko04060//Cytokine-cytokine receptor interaction//Signaling molecules and interaction//Environmental Information Processing;ko04068//FoxO signaling pathway//Signal transduction//Environmental Information Processing;ko04520//Adherens junction/…	-	-	-
UNIGENE0009959	11	0	-0.07	-0.66	0.42	col27a1b	PREDICTED: collagen alpha-1(I) chain-like [Sinocyclocheilus rhinocerous]	-	-	-	-
UNIGENE0009986	11	0	0.53	-1	0.26	Acp5	PREDICTED: tartrate-resistant acid phosphatase type 5-like [Sinocyclocheilus anshuiensis]	ko01100//Metabolic pathways//Global and Overview//Metabolism;ko04142//Lysosome//Transport and catabolism//Cellular Processes	-	GO:0016788//hydrolase activity, acting on ester bonds;GO:0016791//phosphatase activity;GO:0042578//phosphoric ester hydrolase activity;GO:0016787//hydrolase activity;GO:0003824//catalytic activity	GO:0006793//phosphorus metabolic process;GO:0009987//cellular process;GO:0044237//cellular metabolic process;GO:0008152//metabolic process;GO:0006796//phosphate-containing compound metabolic process
UNIGENE0009987	11	0	0.21	-0.96	0.32	-	--	-	-	-	-
UNIGENE0010078	11	0	-0.37	-5.02	1.33	Itpr1	PREDICTED: inositol 1,4,5-trisphosphate receptor type 1-like [Sinocyclocheilus anshuiensis]	ko04020//Calcium signaling pathway//Signal transduction//Environmental Information Processing;ko04270//Vascular smooth muscle contraction//Circulatory system//Organismal Systems;ko04912//GnRH signaling pathway//Endocrine system//Organismal Systems;ko04540//Gap junction//Cellular commiunity//Cellular Processes;ko04114//Oocyte meiosis//Cell growth and death//Cellular Processes;ko04070//Phosphatidyl…	-	-	-
UNIGENE0010118	11	0	0.73	-1.53	-0.31	-	--	-	-	-	-
UNIGENE0010125	11	0	-0.02	-3.28	-0.47	-	hypothetical protein cypCar_00019192 [Cyprinus carpio]	-	-	-	-
UNIGENE0010165	11	0	-0.04	-1.72	-0.31	-	--	-	-	-	-
UNIGENE0010168	11	0	1.14	-1.01	0.44	TLR2-2	Toll-like receptor 2 [Megalobrama amblycephala]	ko04145//Phagosome//Transport and catabolism//Cellular Processes;ko04620//Toll-like receptor signaling pathway//Immune system//Organismal Systems	GO:0044425//membrane part;GO:0016020//membrane;GO:0031224//intrinsic component of membrane	GO:0060089//molecular transducer activity;GO:0004872//receptor activity;GO:0038023//signaling receptor activity;GO:0004871//signal transducer activity	GO:0002253//activation of immune response;GO:0050896//response to stimulus;GO:0006950//response to stress;GO:0045088//regulation of innate immune response;GO:0002682//regulation of immune system process;GO:0002757//immune response-activating signal transduction;GO:0002221//pattern recognition receptor signaling pathway;GO:0031347//regulation of defense response;GO:0002684//positive regulation of …
UNIGENE0010186	11	0	-0.01	-1.74	-0.57	-	--	-	-	-	-
UNIGENE0010334	11	0	0.95	-0.8	0.28	-	--	-	-	-	-
UNIGENE0010458	11	0	0.36	-0.75	-0.16	FLT4	PREDICTED: vascular endothelial growth factor receptor 3-like [Sinocyclocheilus anshuiensis]	-	-	-	-
UNIGENE0010505	11	0	0.87	-1.13	0.11	-	--	-	-	-	-
UNIGENE0010577	11	0	-0.48	-2.49	-0.16	iaaA	Isoaspartyl peptidase [Larimichthys crocea]	-	-	-	-
UNIGENE0010605	11	0	0.9	-1.12	0.42	-	--	-	-	-	-
UNIGENE0010633	11	0	0.56	-2.79	-0.31	-	--	-	-	-	-
UNIGENE0010643	11	0	0.1	-2.16	-0.94	MME	PREDICTED: neprilysin-like [Cyprinus carpio]	-	-	-	-
UNIGENE0010658	11	0	0.04	-1.88	0.76	-	PREDICTED: B-cell receptor CD22-like [Sinocyclocheilus grahami]	-	-	-	-
UNIGENE0010747	11	0	-0.12	-2.01	-0.81	ALDH3B1	PREDICTED: aldehyde dehydrogenase family 3 member B1 [Danio rerio]	ko01100//Metabolic pathways//Global and Overview//Metabolism;ko01110//Biosynthesis of secondary metabolites//Global and Overview//Metabolism;ko01120//Microbial metabolism in diverse environments//Global and Overview//Metabolism;ko00010//Glycolysis / Gluconeogenesis//Carbohydrate metabolism//Metabolism;ko00980//Metabolism of xenobiotics by cytochrome P450//Xenobiotics biodegradation and metabolism…	-	GO:0016491//oxidoreductase activity;GO:0016903//oxidoreductase activity, acting on the aldehyde or oxo group of donors;GO:0003824//catalytic activity	GO:0008152//metabolic process;GO:0044710//single-organism metabolic process;GO:0044699//single-organism process;GO:0044237//cellular metabolic process;GO:0009987//cellular process
UNIGENE0010838	11	0	0.21	-0.83	0.84	DTNBP1	PREDICTED: dysbindin-like [Sinocyclocheilus grahami]	-	-	-	-
UNIGENE0010851	11	0	0.34	-1.47	-0.08	-	--	-	-	-	-
UNIGENE0010880	11	0	0.47	-0.72	0.14	-	PREDICTED: mucin-5AC-like [Cyprinus carpio]	-	-	-	-
UNIGENE0010903	11	0	-0.68	-2.78	-0.74	Synpr	PREDICTED: synaptoporin [Danio rerio]	-	-	-	-
UNIGENE0010972	11	0	0.1	-1.38	-0.57	-	--	-	-	-	-
UNIGENE0011013	11	0	1.15	-1.33	0.1	-	--	-	-	-	-
UNIGENE0011039	11	0	-0.13	-1.01	0.17	PSD3	PREDICTED: PH and SEC7 domain-containing protein 1-like [Cyprinus carpio]	ko04144//Endocytosis//Transport and catabolism//Cellular Processes	-	-	-
UNIGENE0011048	11	0	0.22	-1.79	-0.23	ACAN	PREDICTED: lectin-like [Cyprinus carpio]	-	-	-	-
UNIGENE0011101	11	0	0.34	-1.08	0.43	-	--	-	-	-	-
UNIGENE0011103	11	0	-0.04	-1.15	0.55	-	PREDICTED: NACHT, LRR and PYD domains-containing protein 12-like [Sinocyclocheilus grahami]	-	-	-	-
UNIGENE0011125	11	0	0.41	-0.82	-0.03	-	--	-	-	-	-
UNIGENE0011149	11	0	0.03	-1.84	-0.31	-	--	-	-	-	-
UNIGENE0011179	11	0	-0.32	-2.43	-0.89	-	--	-	-	-	-
UNIGENE0011240	11	0	0.35	-1.54	0.23	-	--	-	-	-	-
UNIGENE0011279	11	0	-0.11	-0.97	0.73	-	PREDICTED: gypsy retrotransposon integrase-like protein 1 [Oryzias latipes]	-	-	-	-
UNIGENE0011289	11	0	-0.1	-2.28	0.45	POU2AF1	PREDICTED: POU domain class 2-associating factor 1 isoform X1 [Sinocyclocheilus anshuiensis]	-	-	-	-
UNIGENE0011398	11	0	0.53	-0.57	0.09	Serpinh1	PREDICTED: serpin H1-like [Cyprinus carpio]	-	-	-	-
UNIGENE0011399	11	0	0.83	-1.63	0.42	-	--	-	-	-	-
UNIGENE0011441	11	0	1.04	-1.39	0.05	-	PREDICTED: polymeric immunoglobulin receptor-like [Sinocyclocheilus rhinocerous]	-	-	-	-
UNIGENE0011490	11	0	0.41	-1.81	-0.44	CXCL8	PREDICTED: interleukin-8-like [Cyprinus carpio]	ko04060//Cytokine-cytokine receptor interaction//Signaling molecules and interaction//Environmental Information Processing;ko04620//Toll-like receptor signaling pathway//Immune system//Organismal Systems;ko04621//NOD-like receptor signaling pathway//Immune system//Organismal Systems;ko04622//RIG-I-like receptor signaling pathway//Immune system//Organismal Systems	-	-	-
UNIGENE0011503	11	0	1.08	-1	0.09	-	--	-	-	-	-
UNIGENE0011548	11	0	0.01	-0.56	0.45	Col11a1	PREDICTED: collagen alpha-1(XI) chain-like [Sinocyclocheilus rhinocerous]	-	-	-	-
UNIGENE0011571	11	0	0.17	-1.37	0.42	-	PREDICTED: prostaglandin E2 receptor EP2 subtype-like [Sinocyclocheilus grahami]	ko04080//Neuroactive ligand-receptor interaction//Signaling molecules and interaction//Environmental Information Processing	GO:0016020//membrane	GO:0004888//transmembrane signaling receptor activity;GO:0004955//prostaglandin receptor activity;GO:0060089//molecular transducer activity;GO:0038023//signaling receptor activity;GO:0099600//transmembrane receptor activity;GO:0004953//icosanoid receptor activity;GO:0004930//G-protein coupled receptor activity;GO:0004871//signal transducer activity;GO:0004872//receptor activity;GO:0004954//prosta…	GO:0044700//single organism signaling;GO:0023052//signaling;GO:0009987//cellular process;GO:0044763//single-organism cellular process;GO:0050896//response to stimulus;GO:0051716//cellular response to stimulus;GO:0044699//single-organism process;GO:0050794//regulation of cellular process;GO:0065007//biological regulation;GO:0007165//signal transduction;GO:0007154//cell communication;GO:0050789//re…
UNIGENE0011598	11	0	0.78	-1.35	0.96	-	--	-	-	-	-
UNIGENE0011611	11	0	-0.52	-3.86	-0.91	-	PREDICTED: B-cell receptor CD22-like, partial [Sinocyclocheilus grahami]	-	-	-	-
UNIGENE0011616	11	0	0.29	-1.75	0.06	-	--	-	-	-	-
UNIGENE0011620	11	0	0.49	-0.88	0.09	ROCK2	PREDICTED: LOW QUALITY PROTEIN: rho-associated protein kinase 2-like [Sinocyclocheilus anshuiensis]	ko04510//Focal adhesion//Cellular commiunity//Cellular Processes;ko04810//Regulation of actin cytoskeleton//Cell motility//Cellular Processes;ko04270//Vascular smooth muscle contraction//Circulatory system//Organismal Systems;ko04350//TGF-beta signaling pathway//Signal transduction//Environmental Information Processing	GO:0043231//intracellular membrane-bounded organelle;GO:0043226//organelle;GO:0005623//cell;GO:0044424//intracellular part;GO:0005622//intracellular;GO:0043229//intracellular organelle;GO:0016020//membrane;GO:0043228//non-membrane-bounded organelle;GO:0043227//membrane-bounded organelle;GO:0043232//intracellular non-membrane-bounded organelle;GO:0044464//cell part	GO:0032550//purine ribonucleoside binding;GO:0004672//protein kinase activity;GO:0031267//small GTPase binding;GO:0016772//transferase activity, transferring phosphorus-containing groups;GO:0001882//nucleoside binding;GO:0017016//Ras GTPase binding;GO:0003824//catalytic activity;GO:0043169//cation binding;GO:1901363//heterocyclic compound binding;GO:0016301//kinase activity;GO:0001883//purine nuc…	GO:0051716//cellular response to stimulus;GO:0009790//embryo development;GO:0048332//mesoderm morphogenesis;GO:0065007//biological regulation;GO:0048598//embryonic morphogenesis;GO:1901575//organic substance catabolic process;GO:0043170//macromolecule metabolic process;GO:0009057//macromolecule catabolic process;GO:0023052//signaling;GO:0050789//regulation of biological process;GO:0036211//protei…
UNIGENE0011655	11	0	-0.12	-1.03	0.25	-	PREDICTED: 101 kDa malaria antigen-like [Sinocyclocheilus rhinocerous]	-	-	-	-
UNIGENE0011697	11	0	0.95	-2.52	-0.78	-	--	-	-	-	-
UNIGENE0011713	11	0	0.09	-1.12	0.45	-	--	-	-	-	-
UNIGENE0011732	11	0	0.12	-0.49	0.6	-	PREDICTED: protein NLRC3-like [Danio rerio]	-	-	-	-
UNIGENE0011740	11	0	0.19	-0.8	0.3	FBXO2	PREDICTED: F-box only protein 2-like [Sinocyclocheilus anshuiensis]	ko04141//Protein processing in endoplasmic reticulum//Folding, sorting and degradation//Genetic Information Processing;ko04120//Ubiquitin mediated proteolysis//Folding, sorting and degradation//Genetic Information Processing	-	-	GO:0071704//organic substance metabolic process;GO:0008152//metabolic process;GO:0043170//macromolecule metabolic process;GO:0009057//macromolecule catabolic process;GO:0009056//catabolic process;GO:1901575//organic substance catabolic process
UNIGENE0011749	11	0	0.43	-1.35	-0.44	PKD1L2	PREDICTED: polycystic kidney disease protein 1-like 2 [Sinocyclocheilus rhinocerous]	-	-	-	-
UNIGENE0011761	11	0	0.43	-1.35	0.49	-	PREDICTED: RNA-directed DNA polymerase from mobile element jockey-like [Danio rerio]	-	-	-	-
UNIGENE0011819	11	0	0.49	-0.75	0.07	TRIM35	PREDICTED: nuclear factor 7, brain-like, partial [Sinocyclocheilus rhinocerous]	-	-	-	-
UNIGENE0011852	11	0	-0.09	-1.78	-0.28	-	--	-	-	-	-
UNIGENE0011942	11	0	-0.43	-1.64	0.22	SAMD9L	PREDICTED: sterile alpha motif domain-containing protein 9-like [Cyprinus carpio]	-	-	-	-
UNIGENE0011950	11	0	-0.1	-1.46	0.13	-	--	-	-	-	-
UNIGENE0011953	11	0	-0.24	-2.16	-0.55	-	--	-	-	-	-
UNIGENE0011982	11	0	0.65	-1.4	-0.14	Itgad	PREDICTED: integrin alpha-X-like [Sinocyclocheilus grahami]	ko04810//Regulation of actin cytoskeleton//Cell motility//Cellular Processes;ko04514//Cell adhesion molecules (CAMs)//Signaling molecules and interaction//Environmental Information Processing;ko04145//Phagosome//Transport and catabolism//Cellular Processes	-	-	-
UNIGENE0012008	11	0	0.57	-4.03	0.58	Mecr	PREDICTED: trans-2-enoyl-CoA reductase, mitochondrial-like [Sinocyclocheilus rhinocerous]	ko01100//Metabolic pathways//Global and Overview//Metabolism;ko01212//Fatty acid metabolism//Global and Overview//Metabolism;ko00062//Fatty acid elongation//Lipid metabolism//Metabolism	-	-	-
UNIGENE0012050	11	0	0.84	-1.17	-0.1	-	PREDICTED: beta-catenin-like protein 1 [Cyprinus carpio]	ko03040//Spliceosome//Transcription//Genetic Information Processing	-	-	-
UNIGENE0012067	11	0	0.14	-1.81	-0.07	Plac8l1	PREDICTED: cornifelin-like [Sinocyclocheilus rhinocerous]	-	-	-	-
UNIGENE0012071	11	0	0.38	-1.69	-0.06	-	PREDICTED: uncharacterized protein LOC106522266 [Austrofundulus limnaeus]	-	-	-	-
UNIGENE0012089	11	0	0.64	-1.33	0.57	-	PREDICTED: cytidine deaminase-like isoform X1 [Esox lucius]	-	-	-	-
UNIGENE0012109	11	0	0.51	-1.09	0.53	-	PREDICTED: C-X-C motif chemokine 11-like [Sinocyclocheilus anshuiensis]	ko04060//Cytokine-cytokine receptor interaction//Signaling molecules and interaction//Environmental Information Processing;ko04620//Toll-like receptor signaling pathway//Immune system//Organismal Systems;ko04062//Chemokine signaling pathway//Immune system//Organismal Systems	-	-	-
UNIGENE0012193	11	0	0.17	-0.96	-0.04	IRG1	PREDICTED: cis-aconitate decarboxylase-like isoform X1 [Cyprinus carpio]	-	-	GO:0016836//hydro-lyase activity;GO:0003824//catalytic activity;GO:0016835//carbon-oxygen lyase activity;GO:0016829//lyase activity	-
UNIGENE0012200	11	0	0.09	-1.44	1.12	-	--	-	-	-	-
UNIGENE0012266	11	0	0.29	-1.38	0.66	-	novel protein, partial [Danio rerio]	-	-	-	-
UNIGENE0012272	11	0	0.33	-0.88	0.48	POL	Retrovirus-related Pol polyprotein from transposon 412 [Larimichthys crocea]	-	-	-	-
UNIGENE0012326	11	0	0.56	-2.16	0.42	-	PREDICTED: fibrillin-1-like [Clupea harengus]	-	-	-	-
UNIGENE0012356	11	0	0.4	-1.28	-0.04	-	--	-	-	-	-
UNIGENE0012405	11	0	0.36	-2.29	0.1	-	PREDICTED: SLAM family member 9-like [Sinocyclocheilus rhinocerous]	-	-	-	-
UNIGENE0012412	11	0	0.72	-1.07	-0.23	-	PREDICTED: uncharacterized protein LOC107548845 [Sinocyclocheilus grahami]	-	-	-	-
UNIGENE0012436	11	0	0.04	-1.53	0.69	-	--	-	-	-	-
UNIGENE0012485	11	0	-0.87	-2.46	-0.04	-	--	-	-	-	-
UNIGENE0012511	11	0	0.51	-0.95	-0.12	-	--	-	-	-	-
UNIGENE0012514	11	0	-0.23	-1.77	0.01	CACNB2	PREDICTED: voltage-dependent L-type calcium channel subunit beta-4-like [Sinocyclocheilus grahami]	-	-	GO:0015267//channel activity;GO:0022857//transmembrane transporter activity;GO:0008324//cation transmembrane transporter activity;GO:0005216//ion channel activity;GO:0015085//calcium ion transmembrane transporter activity;GO:0022892//substrate-specific transporter activity;GO:0072509//divalent inorganic cation transmembrane transporter activity;GO:0005261//cation channel activity;GO:0005215//tran…	GO:0070838//divalent metal ion transport;GO:0044699//single-organism process;GO:0044765//single-organism transport;GO:1902578//single-organism localization;GO:0006811//ion transport;GO:0051179//localization;GO:0006816//calcium ion transport;GO:0072511//divalent inorganic cation transport;GO:0006810//transport;GO:0051234//establishment of localization;GO:0030001//metal ion transport;GO:0006812//ca…
UNIGENE0012522	11	0	0.08	-2.24	0.36	-	--	-	-	-	-
UNIGENE0012568	11	0	-0.17	-2.08	0.01	-	PREDICTED: myelin-associated glycoprotein-like [Sinocyclocheilus rhinocerous]	-	-	-	-
UNIGENE0012616	11	0	0.34	-1.66	0.66	Gpr132	PREDICTED: probable G-protein coupled receptor 132 [Sinocyclocheilus anshuiensis]	-	GO:0044425//membrane part;GO:0031224//intrinsic component of membrane;GO:0016020//membrane	GO:0004930//G-protein coupled receptor activity;GO:0004888//transmembrane signaling receptor activity;GO:0060089//molecular transducer activity;GO:0004871//signal transducer activity;GO:0004872//receptor activity;GO:0038023//signaling receptor activity;GO:0099600//transmembrane receptor activity	GO:0044763//single-organism cellular process;GO:0023052//signaling;GO:0009987//cellular process;GO:0065007//biological regulation;GO:0007154//cell communication;GO:0051716//cellular response to stimulus;GO:0050896//response to stimulus;GO:0050789//regulation of biological process;GO:0044700//single organism signaling;GO:0050794//regulation of cellular process;GO:0044699//single-organism process;G…
UNIGENE0012634	11	0	0.58	-0.5	0.16	FAM83G	PREDICTED: protein FAM83G-like isoform X2 [Sinocyclocheilus rhinocerous]	-	-	-	-
UNIGENE0012705	11	0	0.17	-1.95	-0.28	-	--	-	-	-	-
UNIGENE0012731	11	0	-0.79	-2.29	-0.36	CD79B	PREDICTED: B-cell antigen receptor complex-associated protein beta chain-like [Sinocyclocheilus rhinocerous]	-	-	-	-
UNIGENE0012776	11	0	-0.13	-1.28	0.73	-	zinc finger protein 831 [Danio rerio]	-	-	-	-
UNIGENE0012791	11	0	0.27	-0.68	0.83	-	--	-	-	-	-
UNIGENE0012878	11	0	-0.69	-5.46	1.15	-	--	-	-	-	-
UNIGENE0012895	11	0	0.79	-1.11	0.77	-	--	-	-	-	-
UNIGENE0012907	11	0	-0.85	-3.26	-0.92	-	--	-	-	-	-
UNIGENE0012946	11	0	-1.62	-9.31	0.03	-	--	-	-	-	-
UNIGENE0012996	11	0	-0.39	-1.99	1.34	-	--	-	-	-	-
UNIGENE0013062	11	0	0.84	-7.07	2.16	-	PREDICTED: sialoadhesin-like [Cyprinus carpio]	-	-	-	-
UNIGENE0013310	11	0	0.31	-2.23	-0.24	-	--	-	-	-	-
UNIGENE0013311	11	0	0.29	-2.01	-0.77	-	--	-	-	-	-
UNIGENE0013338	11	0	0.81	-1.36	0.57	-	--	-	-	-	-
UNIGENE0013355	11	0	0.27	-1.33	0.86	-	--	-	-	-	-
UNIGENE0013376	11	0	0.11	-1.21	0.33	-	PREDICTED: SLP adapter and CSK-interacting membrane protein-like [Sinocyclocheilus rhinocerous]	-	-	-	-
UNIGENE0013390	11	0	-0.31	-2.08	0.67	-	--	-	-	-	-
UNIGENE0013391	11	0	-0.36	-2.65	-0.68	-	PREDICTED: paired box protein Pax-3-like, partial [Sinocyclocheilus anshuiensis]	-	-	-	-
UNIGENE0013425	11	0	0.27	-1.88	0.74	-	PREDICTED: uncharacterized protein LOC109048828 [Cyprinus carpio]	-	-	-	-
UNIGENE0013473	11	0	0.99	-4.37	1.14	-	--	-	-	-	-
UNIGENE0013536	11	0	0.73	-2.19	0.9	PLAU	PREDICTED: urokinase-type plasminogen activator-like [Sinocyclocheilus anshuiensis]	-	-	GO:0004175//endopeptidase activity;GO:0008233//peptidase activity;GO:0003824//catalytic activity;GO:0016740//transferase activity;GO:0016772//transferase activity, transferring phosphorus-containing groups;GO:0070011//peptidase activity, acting on L-amino acid peptides;GO:0016787//hydrolase activity	GO:0044238//primary metabolic process;GO:0006796//phosphate-containing compound metabolic process;GO:0019538//protein metabolic process;GO:0016485//protein processing;GO:0009987//cellular process;GO:0008152//metabolic process;GO:0010467//gene expression;GO:0006508//proteolysis;GO:0043170//macromolecule metabolic process;GO:0071704//organic substance metabolic process;GO:0044237//cellular metaboli…
UNIGENE0013554	11	0	1.17	-6.07	-0.31	RXFP3	PREDICTED: relaxin-3 receptor 1-like [Sinocyclocheilus anshuiensis]	ko04080//Neuroactive ligand-receptor interaction//Signaling molecules and interaction//Environmental Information Processing	-	-	-
UNIGENE0013595	11	0	-0.14	-1.59	0.27	XCR1	PREDICTED: chemokine XC receptor 1-like [Sinocyclocheilus grahami]	ko04060//Cytokine-cytokine receptor interaction//Signaling molecules and interaction//Environmental Information Processing	-	-	-
UNIGENE0013644	11	0	0.34	-1.51	0.26	TLR1	toll-like receptor 1 [Ctenopharyngodon idella]	ko04620//Toll-like receptor signaling pathway//Immune system//Organismal Systems	GO:0016020//membrane;GO:0044425//membrane part;GO:0031224//intrinsic component of membrane	GO:0004872//receptor activity;GO:0060089//molecular transducer activity;GO:0004871//signal transducer activity;GO:0038023//signaling receptor activity	GO:0045089//positive regulation of innate immune response;GO:0007154//cell communication;GO:0042494//detection of bacterial lipoprotein;GO:0007165//signal transduction;GO:0002757//immune response-activating signal transduction;GO:0002221//pattern recognition receptor signaling pathway;GO:0048584//positive regulation of response to stimulus;GO:0002764//immune response-regulating signaling pathway;…
UNIGENE0013703	11	0	0.49	-0.53	0.28	Irf4	interferon regulatory factor 10 [Ctenopharyngodon idella]	-	-	GO:0005488//binding;GO:0003676//nucleic acid binding;GO:0001067//regulatory region nucleic acid binding;GO:1901363//heterocyclic compound binding;GO:0097159//organic cyclic compound binding	GO:0034654//nucleobase-containing compound biosynthetic process;GO:0032774//RNA biosynthetic process;GO:1901360//organic cyclic compound metabolic process;GO:0008152//metabolic process;GO:0006807//nitrogen compound metabolic process;GO:0044260//cellular macromolecule metabolic process;GO:0043170//macromolecule metabolic process;GO:1901362//organic cyclic compound biosynthetic process;GO:0071704//…
UNIGENE0013718	11	0	0.5	-1.36	-0.15	-	--	-	-	-	-
UNIGENE0013726	11	0	-0.06	-1.29	0.85	-	--	-	-	-	-
UNIGENE0013747	11	0	-0.68	-2.29	0.64	-	--	-	-	-	-
UNIGENE0013749	11	0	0.21	-1.11	0.25	-	--	-	-	-	-
UNIGENE0013753	11	0	0.81	-2.25	-0.49	-	--	-	-	-	-
UNIGENE0013762	11	0	0.24	-6.05	-0.09	-	--	-	-	-	-
UNIGENE0013790	11	0	-0.08	-8.18	0.06	-	novel protein similar to DNA polymerases [Danio rerio]	-	-	GO:0003824//catalytic activity;GO:0016787//hydrolase activity;GO:0016772//transferase activity, transferring phosphorus-containing groups;GO:0005488//binding;GO:0004518//nuclease activity;GO:0097159//organic cyclic compound binding;GO:0004527//exonuclease activity;GO:0016740//transferase activity;GO:0016779//nucleotidyltransferase activity;GO:1901363//heterocyclic compound binding;GO:0016788//hyd…	GO:0008152//metabolic process;GO:0034641//cellular nitrogen compound metabolic process;GO:0090304//nucleic acid metabolic process;GO:0044238//primary metabolic process;GO:0006139//nucleobase-containing compound metabolic process;GO:0006259//DNA metabolic process;GO:0071704//organic substance metabolic process;GO:0043170//macromolecule metabolic process;GO:0044260//cellular macromolecule metabolic…
UNIGENE0013807	11	0	-0.63	-1.47	0.09	-	PREDICTED: interferon-induced GTP-binding protein Mx-like isoform X1 [Salmo salar]	-	-	-	-
UNIGENE0013881	11	0	0.89	-1.8	1.92	-	--	-	-	-	-
UNIGENE0013904	11	0	0.47	-1.08	1.09	-	PREDICTED: versican core protein-like [Sinocyclocheilus anshuiensis]	-	-	-	-
UNIGENE0013967	11	0	0.86	-1.14	-0.1	-	--	-	-	-	-
UNIGENE0013987	11	0	-0.08	-1.84	1.15	-	PREDICTED: interphotoreceptor matrix proteoglycan 2-like isoform X1 [Sinocyclocheilus anshuiensis]	-	-	-	-
UNIGENE0014000	11	0	0.3	-1.54	1.16	-	--	-	-	-	-
UNIGENE0014048	11	0	0.63	-0.85	0.36	-	--	-	-	-	-
UNIGENE0014145	11	0	1.2	-8.77	-0.7	Cdh4	PREDICTED: desmoglein-2-like [Sinocyclocheilus grahami]	ko04514//Cell adhesion molecules (CAMs)//Signaling molecules and interaction//Environmental Information Processing	-	-	-
UNIGENE0014174	11	0	1.82	-7.22	2.82	-	PREDICTED: LOW QUALITY PROTEIN: kinesin-like calmodulin-binding protein homolog [Sinocyclocheilus rhinocerous]	-	-	-	-
UNIGENE0014186	11	0	-0.55	-2.32	-0.22	ostc	PREDICTED: oligosaccharyltransferase complex subunit OSTC [Larimichthys crocea]	-	GO:0044425//membrane part;GO:0016020//membrane;GO:0031224//intrinsic component of membrane	GO:0003824//catalytic activity	-
UNIGENE0014212	11	0	1.31	-1.69	1.02	-	--	-	-	-	-
UNIGENE0014256	11	0	-0.11	-2.89	1.25	-	colony stimulating factor 3 (granulocyte) a [Danio rerio]	ko04060//Cytokine-cytokine receptor interaction//Signaling molecules and interaction//Environmental Information Processing;ko04630//Jak-STAT signaling pathway//Signal transduction//Environmental Information Processing	-	-	-
UNIGENE0014301	11	0	1.61	-3.36	1.2	-	PREDICTED: interleukin-12 subunit beta-like [Sinocyclocheilus rhinocerous]	ko04060//Cytokine-cytokine receptor interaction//Signaling molecules and interaction//Environmental Information Processing;ko04630//Jak-STAT signaling pathway//Signal transduction//Environmental Information Processing;ko04620//Toll-like receptor signaling pathway//Immune system//Organismal Systems;ko04622//RIG-I-like receptor signaling pathway//Immune system//Organismal Systems	-	GO:0005102//receptor binding;GO:0005488//binding;GO:0005515//protein binding	-
UNIGENE0014374	11	0	-0.58	-2.08	-0.35	-	PREDICTED: T-cell-specific surface glycoprotein CD28-like isoform X1 [Ictalurus punctatus]	ko04514//Cell adhesion molecules (CAMs)//Signaling molecules and interaction//Environmental Information Processing;ko04672//Intestinal immune network for IgA production//Immune system//Organismal Systems;ko04660//T cell receptor signaling pathway//Immune system//Organismal Systems	-	-	-
UNIGENE0014377	11	0	1.49	-1.97	0.62	-	--	-	-	-	-
UNIGENE0014455	11	0	-0.62	-1.92	0.17	AIG1	PREDICTED: androgen-induced gene 1 protein-like [Cyprinus carpio]	-	-	-	-
UNIGENE0014514	11	0	1.58	-2.18	-0.05	-	hypothetical protein cypCar_00038927 [Cyprinus carpio]	-	-	-	-
UNIGENE0014589	11	0	0.51	-0.8	0.31	epd	PREDICTED: ependymin-like [Cyprinus carpio]	-	-	-	-
UNIGENE0014603	11	0	0.42	-1.31	0.59	-	--	-	-	-	-
UNIGENE0014654	11	0	-0.28	-2.52	0.12	PLA2G4F	PREDICTED: cytosolic phospholipase A2 delta-like [Cyprinus carpio]	ko01100//Metabolic pathways//Global and Overview//Metabolism;ko04010//MAPK signaling pathway//Signal transduction//Environmental Information Processing;ko01110//Biosynthesis of secondary metabolites//Global and Overview//Metabolism;ko04270//Vascular smooth muscle contraction//Circulatory system//Organismal Systems;ko04912//GnRH signaling pathway//Endocrine system//Organismal Systems;ko00564//Glyc…	-	-	-
UNIGENE0014666	11	0	-0.21	-2.38	-0.04	-	--	-	-	-	-
UNIGENE0014678	11	0	0.26	-1.81	1.05	-	--	-	-	-	-
UNIGENE0014707	11	0	0.01	-7.56	0.72	-	--	-	-	-	-
UNIGENE0014770	11	0	0.53	-1.58	0.67	-	--	-	-	-	-
UNIGENE0014787	11	0	0.72	-8.16	1.86	-	PREDICTED: homeobox protein aristaless-like 4 [Sinocyclocheilus grahami]	-	-	-	-
UNIGENE0014788	11	0	0.55	-3.02	0.93	Alx4	PREDICTED: homeobox protein aristaless-like 4 [Sinocyclocheilus anshuiensis]	-	GO:0043231//intracellular membrane-bounded organelle;GO:0043227//membrane-bounded organelle;GO:0005622//intracellular;GO:0005623//cell;GO:0044424//intracellular part;GO:0043226//organelle;GO:0044464//cell part;GO:0043229//intracellular organelle	GO:0005488//binding;GO:0003676//nucleic acid binding;GO:0097159//organic cyclic compound binding;GO:1901363//heterocyclic compound binding;GO:0001071//nucleic acid binding transcription factor activity	GO:0044707//single-multicellular organism process;GO:0043170//macromolecule metabolic process;GO:1901360//organic cyclic compound metabolic process;GO:0032774//RNA biosynthetic process;GO:0044699//single-organism process;GO:0019438//aromatic compound biosynthetic process;GO:0090304//nucleic acid metabolic process;GO:0034641//cellular nitrogen compound metabolic process;GO:0044249//cellular biosyn…
UNIGENE0014878	11	0	-0.66	-3.13	0.21	-	--	-	-	-	-
UNIGENE0014923	11	0	-0.01	-2.53	0.34	-	--	-	-	-	-
UNIGENE0014947	11	0	-0.21	-5.57	-2.05	-	--	-	-	-	-
UNIGENE0014948	11	0	-0.39	-3.39	-1.27	-	--	-	-	-	-
UNIGENE0015028	11	0	0.45	-2.64	-0.08	-	--	-	-	-	-
UNIGENE0015029	11	0	-0.71	-3.72	-0.4	-	PREDICTED: LOW QUALITY PROTEIN: fibrillin-2-like [Sinocyclocheilus grahami]	-	-	-	-
UNIGENE0015039	11	0	0.68	-0.97	0.16	-	--	-	-	-	-
UNIGENE0015041	11	0	0.55	-3.14	-0.07	Tlr8	Toll-like receptor 8a [Megalobrama amblycephala]	ko04620//Toll-like receptor signaling pathway//Immune system//Organismal Systems	-	-	-
UNIGENE0015086	11	0	-0.6	-4.59	0.16	-	--	-	-	-	-
UNIGENE0015100	11	0	1.02	-7.36	0.41	Calhm1	PREDICTED: calcium homeostasis modulator protein 1-like [Cyprinus carpio]	-	-	-	-
UNIGENE0015101	11	0	1.68	-2.07	0.04	-	PREDICTED: calcium homeostasis modulator protein 1-like [Sinocyclocheilus rhinocerous]	-	-	-	-
UNIGENE0015144	11	0	-0.19	-4.28	0.08	-	--	-	-	-	-
UNIGENE0015163	11	0	0.72	-1.68	-0.23	-	--	-	-	-	-
UNIGENE0015201	11	0	0.07	-1.62	0.69	-	--	-	-	-	-
UNIGENE0015206	11	0	-0.1	-2.3	-0.37	-	--	-	-	-	-
UNIGENE0015211	11	0	0.19	-8.55	-3.25	-	PREDICTED: uncharacterized protein LOC109080161 [Cyprinus carpio]	-	-	-	-
UNIGENE0015220	11	0	-0.15	-1.5	-0.46	CXCR5	interferon regulatory factor 5 [Ctenopharyngodon idella]	ko04060//Cytokine-cytokine receptor interaction//Signaling molecules and interaction//Environmental Information Processing	-	GO:0001637//G-protein coupled chemoattractant receptor activity;GO:0008528//G-protein coupled peptide receptor activity;GO:0004930//G-protein coupled receptor activity;GO:0001653//peptide receptor activity;GO:0004950//chemokine receptor activity;GO:0060089//molecular transducer activity;GO:0004872//receptor activity;GO:0004896//cytokine receptor activity;GO:0004871//signal transducer activity;GO:…	GO:0042221//response to chemical;GO:0044699//single-organism process;GO:0050794//regulation of cellular process;GO:0007165//signal transduction;GO:0050789//regulation of biological process;GO:0051716//cellular response to stimulus;GO:0044700//single organism signaling;GO:0065007//biological regulation;GO:0050896//response to stimulus;GO:0009987//cellular process;GO:0044763//single-organism cellul…
UNIGENE0015254	11	0	0.12	-1.84	-0.26	-	--	-	-	-	-
UNIGENE0015333	11	0	0.23	-1.44	0.77	Cx3cr1	PREDICTED: C-C chemokine receptor type 5-like [Sinocyclocheilus grahami]	ko04060//Cytokine-cytokine receptor interaction//Signaling molecules and interaction//Environmental Information Processing	-	-	-
UNIGENE0015373	11	0	0.27	-1.07	-0.32	-	--	-	-	-	-
UNIGENE0015383	11	0	-0.1	-1.03	0.33	-	--	-	-	-	-
UNIGENE0015427	11	0	-0.28	-2.38	0.36	-	--	-	-	-	-
UNIGENE0015431	11	0	0	-2.55	0.53	-	--	-	-	-	-
UNIGENE0015535	11	0	0.68	-1.23	-0.17	-	--	-	-	-	-
UNIGENE0015609	11	0	-0.68	-2.81	0.01	-	PREDICTED: protein FAM83B-like [Sinocyclocheilus rhinocerous]	-	-	-	-
UNIGENE0015632	11	0	1.22	-1.83	0.14	-	--	-	-	-	-
UNIGENE0015649	11	0	0.54	-1.97	-0.08	-	--	-	-	-	-
UNIGENE0015690	11	0	0.52	-1.36	1.07	-	PREDICTED: stromal interaction molecule 2-like [Sinocyclocheilus rhinocerous]	ko04020//Calcium signaling pathway//Signal transduction//Environmental Information Processing	-	-	-
UNIGENE0015691	11	0	0.43	-2.16	0.09	-	PREDICTED: intersectin-2-like [Kryptolebias marmoratus]	-	-	-	-
UNIGENE0015735	11	0	-0.76	-4.65	-1.73	-	--	-	-	-	-
UNIGENE0015758	11	0	-0.18	-8.27	-0.12	-	PREDICTED: zinc finger MYND domain-containing protein 12 [Oryzias latipes]	-	-	-	-
UNIGENE0015772	11	0	-0.2	-0.99	0.4	CPOX	PREDICTED: oxygen-dependent coproporphyrinogen-III oxidase, mitochondrial-like [Sinocyclocheilus anshuiensis]	ko01100//Metabolic pathways//Global and Overview//Metabolism;ko01110//Biosynthesis of secondary metabolites//Global and Overview//Metabolism;ko00860//Porphyrin and chlorophyll metabolism//Metabolism of cofactors and vitamins//Metabolism	-	GO:0003824//catalytic activity;GO:0016627//oxidoreductase activity, acting on the CH-CH group of donors;GO:0016634//oxidoreductase activity, acting on the CH-CH group of donors, oxygen as acceptor;GO:0016491//oxidoreductase activity	GO:0033013//tetrapyrrole metabolic process;GO:0006725//cellular aromatic compound metabolic process;GO:0044699//single-organism process;GO:0046483//heterocycle metabolic process;GO:0019538//protein metabolic process;GO:1901564//organonitrogen compound metabolic process;GO:0044710//single-organism metabolic process;GO:0009987//cellular process;GO:1901360//organic cyclic compound metabolic process;…
UNIGENE0015777	11	0	0.86	-0.84	0.29	-	PREDICTED: platelet endothelial cell adhesion molecule-like [Sinocyclocheilus grahami]	ko04514//Cell adhesion molecules (CAMs)//Signaling molecules and interaction//Environmental Information Processing	-	-	-
UNIGENE0015860	11	0	0.02	-1.44	0.04	-	--	-	-	-	-
UNIGENE0015895	11	0	0.5	-2.76	-0.61	-	--	-	-	-	-
UNIGENE0015947	11	0	0.14	-3.83	-0.55	-	--	-	-	-	-
UNIGENE0015953	11	0	0.76	-3.43	0.02	-	--	-	-	-	-
UNIGENE0016036	11	0	0.91	-1.31	0.39	-	--	-	-	-	-
UNIGENE0016192	11	0	0.7	-1.43	-0.28	-	PREDICTED: ATP-dependent DNA helicase PIF1-like [Cyprinus carpio]	-	-	-	GO:0006259//DNA metabolic process;GO:0043170//macromolecule metabolic process;GO:0044238//primary metabolic process;GO:0034641//cellular nitrogen compound metabolic process;GO:0090304//nucleic acid metabolic process;GO:0006807//nitrogen compound metabolic process;GO:0006139//nucleobase-containing compound metabolic process;GO:0046483//heterocycle metabolic process;GO:0071704//organic substance me…
UNIGENE0016199	11	0	0.25	-3.57	-0.11	-	--	-	-	-	-
UNIGENE0016208	11	0	0.51	-1.26	0.22	Alox5ap	PREDICTED: arachidonate 5-lipoxygenase-activating protein-like [Sinocyclocheilus anshuiensis]	-	-	-	-
UNIGENE0016232	11	0	0.71	-0.97	-0.13	-	PREDICTED: polycystic kidney disease protein 1-like 2 [Sinocyclocheilus rhinocerous]	-	-	-	-
UNIGENE0016277	11	0	0.54	-1.67	0.62	-	--	-	-	-	-
UNIGENE0016375	11	0	0.37	-2.07	0.79	Flvcr2	PREDICTED: feline leukemia virus subgroup C receptor-related protein 2 [Sinocyclocheilus rhinocerous]	-	-	-	-
UNIGENE0016383	11	0	0	-0.64	0.61	IRF4	interferon regulatory factor 4a [Ctenopharyngodon idella]	-	-	GO:0001067//regulatory region nucleic acid binding;GO:0097159//organic cyclic compound binding;GO:0005488//binding;GO:1901363//heterocyclic compound binding;GO:0003676//nucleic acid binding	GO:0044260//cellular macromolecule metabolic process;GO:0097659//nucleic acid-templated transcription;GO:0034645//cellular macromolecule biosynthetic process;GO:0019438//aromatic compound biosynthetic process;GO:0006139//nucleobase-containing compound metabolic process;GO:0044249//cellular biosynthetic process;GO:0010467//gene expression;GO:0009987//cellular process;GO:0044238//primary metabolic …
UNIGENE0016426	11	0	0.69	-0.98	-0.15	-	--	-	-	-	-
UNIGENE0016431	11	0	0.51	-1.77	0.44	KRT19	PREDICTED: keratin, type I cytoskeletal 47 kDa-like isoform X1 [Sinocyclocheilus anshuiensis]	-	-	-	-
UNIGENE0016489	11	0	-0.07	-2.19	0.12	Pol	Retrovirus-related Pol polyprotein LINE-1, partial [Larimichthys crocea]	-	-	-	-
UNIGENE0016508	11	0	0.3	-1.31	0.24	ABCG24	PREDICTED: zonadhesin-like [Danio rerio]	-	-	-	-
UNIGENE0016616	11	0	-0.11	-7.18	0.16	-	--	-	-	-	-
UNIGENE0016656	11	0	-0.27	-1.76	0.93	-	--	-	-	-	-
UNIGENE0016699	11	0	-0.16	-9.16	0.81	-	PREDICTED: agglutinin-like protein 10 [Sinocyclocheilus rhinocerous]	-	-	-	-
UNIGENE0016801	11	0	1.08	-1.05	0.37	-	--	-	-	-	-
UNIGENE0016828	11	0	-0.51	-4.36	-1.35	-	--	-	-	-	-
UNIGENE0016829	11	0	-0.56	-2.62	-0.85	Bcl11b	PREDICTED: B-cell lymphoma/leukemia 11B [Danio rerio]	-	-	-	-
UNIGENE0016831	11	0	-0.06	-2.52	-1	-	--	-	-	-	-
UNIGENE0016870	11	0	0.43	-1.65	0.25	PTPN6	PREDICTED: tyrosine-protein phosphatase non-receptor type 6-like isoform X2 [Sinocyclocheilus rhinocerous]	ko04630//Jak-STAT signaling pathway//Signal transduction//Environmental Information Processing;ko04520//Adherens junction//Cellular commiunity//Cellular Processes	GO:0005623//cell;GO:0044424//intracellular part;GO:0005622//intracellular;GO:0044464//cell part	GO:0003824//catalytic activity;GO:0042578//phosphoric ester hydrolase activity;GO:0016791//phosphatase activity;GO:0016788//hydrolase activity, acting on ester bonds;GO:0016787//hydrolase activity;GO:0004721//phosphoprotein phosphatase activity	GO:0006464//cellular protein modification process;GO:0044260//cellular macromolecule metabolic process;GO:0036211//protein modification process;GO:0044237//cellular metabolic process;GO:0044238//primary metabolic process;GO:0008152//metabolic process;GO:0009987//cellular process;GO:0071704//organic substance metabolic process;GO:0019538//protein metabolic process;GO:0044267//cellular protein meta…
UNIGENE0016897	11	0	1.11	-1.65	-0.08	-	--	-	-	-	-
UNIGENE0016921	11	0	0.47	-0.74	-0.09	Ovol2	PREDICTED: putative transcription factor Ovo-like 1 isoform X1 [Sinocyclocheilus grahami]	-	GO:0044464//cell part;GO:0043231//intracellular membrane-bounded organelle;GO:0043226//organelle;GO:0043227//membrane-bounded organelle;GO:0043229//intracellular organelle;GO:0005622//intracellular;GO:0005623//cell;GO:0044424//intracellular part	GO:0097159//organic cyclic compound binding;GO:0043167//ion binding;GO:0005488//binding;GO:0001071//nucleic acid binding transcription factor activity;GO:0043169//cation binding	GO:0033036//macromolecule localization;GO:0048856//anatomical structure development;GO:0008104//protein localization;GO:0045184//establishment of protein localization;GO:0006928//movement of cell or subcellular component;GO:0016477//cell migration;GO:0051179//localization;GO:0044699//single-organism process;GO:0001667//ameboidal-type cell migration;GO:0043170//macromolecule metabolic process;GO:0…
UNIGENE0016992	11	0	0.38	-1.06	0.01	-	--	-	-	-	-
UNIGENE0017051	11	0	-0.23	-3.91	-1.76	-	--	-	-	-	-
UNIGENE0017144	11	0	-0.77	-3.09	-0.68	-	--	-	-	-	-
UNIGENE0017154	11	0	0.4	-0.92	0.52	-	--	-	-	-	-
UNIGENE0017239	11	0	0.78	-0.6	0.23	-	--	-	-	-	-
UNIGENE0017243	11	0	0.5	-2.01	1.28	-	--	-	-	-	-
UNIGENE0017244	11	0	0.46	-1.32	1.61	-	--	-	-	-	-
UNIGENE0017263	11	0	-0.43	-1.33	0.68	hand2	dHAND [Danio rerio]	-	GO:0043231//intracellular membrane-bounded organelle;GO:0043226//organelle;GO:0043227//membrane-bounded organelle;GO:0044464//cell part;GO:0043229//intracellular organelle;GO:0005623//cell;GO:0044424//intracellular part;GO:0005622//intracellular	GO:0003676//nucleic acid binding;GO:0005488//binding;GO:0097159//organic cyclic compound binding;GO:1901363//heterocyclic compound binding;GO:0005515//protein binding	GO:0060485//mesenchyme development;GO:0044260//cellular macromolecule metabolic process;GO:0048856//anatomical structure development;GO:0071704//organic substance metabolic process;GO:0072358//cardiovascular system development;GO:0097659//nucleic acid-templated transcription;GO:0009790//embryo development;GO:0010467//gene expression;GO:0046483//heterocycle metabolic process;GO:0009059//macromolec…
UNIGENE0017298	11	0	0.53	-1.45	0.21	-	--	-	-	-	-
UNIGENE0017345	11	0	-0.69	-3.82	-1.31	-	--	-	-	-	-
UNIGENE0017352	11	0	-0.6	-4.38	-1.25	-	--	-	-	-	-
UNIGENE0017353	11	0	1.07	-1.54	-0.09	-	--	-	-	-	-
UNIGENE0017358	11	0	-0.79	-5.4	-0.52	SAA3	PREDICTED: serum amyloid A protein isoform X1 [Danio rerio]	-	GO:0005615//extracellular space;GO:0032991//macromolecular complex;GO:0005576//extracellular region;GO:0044421//extracellular region part;GO:0032994//protein-lipid complex;GO:1990777//lipoprotein particle;GO:0034358//plasma lipoprotein particle	-	GO:0006954//inflammatory response;GO:0006952//defense response;GO:0006950//response to stress;GO:0050896//response to stimulus;GO:0002526//acute inflammatory response
UNIGENE0017411	11	0	1.07	-1.3	0.62	-	--	-	-	-	-
UNIGENE0017413	11	0	0.46	-2.88	-0.16	Prdm1	PREDICTED: PR domain zinc finger protein 1-like [Sinocyclocheilus anshuiensis]	-	-	GO:0043169//cation binding;GO:0097159//organic cyclic compound binding;GO:0005488//binding;GO:0001071//nucleic acid binding transcription factor activity;GO:0043167//ion binding	GO:0009792//embryo development ending in birth or egg hatching;GO:0032774//RNA biosynthetic process;GO:0043170//macromolecule metabolic process;GO:0010467//gene expression;GO:0008152//metabolic process;GO:1901576//organic substance biosynthetic process;GO:0090304//nucleic acid metabolic process;GO:0071704//organic substance metabolic process;GO:0048568//embryonic organ development;GO:0048762//mes…
UNIGENE0017425	11	0	-0.49	-2.39	-0.23	gpr173	PREDICTED: probable G-protein coupled receptor 173 [Sinocyclocheilus anshuiensis]	-	-	GO:0038023//signaling receptor activity;GO:0004871//signal transducer activity;GO:0060089//molecular transducer activity;GO:0004888//transmembrane signaling receptor activity;GO:0099600//transmembrane receptor activity;GO:0004872//receptor activity	GO:0007165//signal transduction;GO:0050794//regulation of cellular process;GO:0050896//response to stimulus;GO:0065007//biological regulation;GO:0051716//cellular response to stimulus;GO:0044700//single organism signaling;GO:0044699//single-organism process;GO:0007166//cell surface receptor signaling pathway;GO:0009987//cellular process;GO:0023052//signaling;GO:0050789//regulation of biological p…
UNIGENE0017429	11	0	-0.29	-1.05	0.58	-	--	-	-	-	-
UNIGENE0017434	11	0	0.21	-1.14	-0.41	Gpr65	PREDICTED: psychosine receptor-like [Sinocyclocheilus grahami]	-	GO:0044425//membrane part;GO:0016020//membrane;GO:0031224//intrinsic component of membrane	GO:0060089//molecular transducer activity	GO:0007166//cell surface receptor signaling pathway;GO:0044700//single organism signaling;GO:0007165//signal transduction;GO:0007154//cell communication;GO:0044699//single-organism process;GO:0009987//cellular process;GO:0044763//single-organism cellular process;GO:0050896//response to stimulus;GO:0051716//cellular response to stimulus;GO:0050794//regulation of cellular process;GO:0065007//biolog…
UNIGENE0017446	11	0	0.17	-1.37	0.3	RYR2	ryanodine receptor 2b, partial [Danio rerio]	ko04020//Calcium signaling pathway//Signal transduction//Environmental Information Processing;ko04261//Adrenergic signaling in cardiomyocytes//Circulatory system//Organismal Systems;ko04260//Cardiac muscle contraction//Circulatory system//Organismal Systems;ko04024//cAMP signaling pathway//Signal transduction//Environmental Information Processing;ko04713//Circadian entrainment//Environmental adap…	GO:0044432//endoplasmic reticulum part;GO:0043231//intracellular membrane-bounded organelle;GO:0043292//contractile fiber;GO:0098796//membrane protein complex;GO:0043228//non-membrane-bounded organelle;GO:0019897//extrinsic component of plasma membrane;GO:0031090//organelle membrane;GO:0005886//plasma membrane;GO:0032991//macromolecular complex;GO:0005789//endoplasmic reticulum membrane;GO:004442…	GO:0004871//signal transducer activity;GO:0097159//organic cyclic compound binding;GO:0043169//cation binding;GO:0022892//substrate-specific transporter activity;GO:0015075//ion transmembrane transporter activity;GO:0099600//transmembrane receptor activity;GO:0004888//transmembrane signaling receptor activity;GO:0019900//kinase binding;GO:0015276//ligand-gated ion channel activity;GO:0060089//mol…	GO:0034613//cellular protein localization;GO:0006915//apoptotic process;GO:0006928//movement of cell or subcellular component;GO:0051050//positive regulation of transport;GO:0007275//multicellular organism development;GO:0003206//cardiac chamber morphogenesis;GO:0014074//response to purine-containing compound;GO:0033365//protein localization to organelle;GO:0009605//response to external stimulus;…
UNIGENE0017447	11	0	-0.21	-1.14	0.51	Ryr2	PREDICTED: LOW QUALITY PROTEIN: ryanodine receptor 2-like [Cyprinus carpio]	ko04020//Calcium signaling pathway//Signal transduction//Environmental Information Processing;ko04261//Adrenergic signaling in cardiomyocytes//Circulatory system//Organismal Systems;ko04260//Cardiac muscle contraction//Circulatory system//Organismal Systems;ko04024//cAMP signaling pathway//Signal transduction//Environmental Information Processing;ko04713//Circadian entrainment//Environmental adap…	GO:0016020//membrane;GO:0043226//organelle;GO:0044425//membrane part;GO:0005622//intracellular;GO:0005623//cell;GO:0044464//cell part;GO:0044424//intracellular part;GO:0043229//intracellular organelle;GO:0031224//intrinsic component of membrane;GO:0043231//intracellular membrane-bounded organelle;GO:0043227//membrane-bounded organelle	GO:0005057//receptor signaling protein activity;GO:0004872//receptor activity;GO:0022891//substrate-specific transmembrane transporter activity;GO:0046872//metal ion binding;GO:0022838//substrate-specific channel activity;GO:0005215//transporter activity;GO:0005216//ion channel activity;GO:0043167//ion binding;GO:0072509//divalent inorganic cation transmembrane transporter activity;GO:0015085//ca…	GO:0006875//cellular metal ion homeostasis;GO:0072511//divalent inorganic cation transport;GO:1902578//single-organism localization;GO:0070838//divalent metal ion transport;GO:0044699//single-organism process;GO:0055080//cation homeostasis;GO:0019725//cellular homeostasis;GO:0051234//establishment of localization;GO:0006811//ion transport;GO:0030001//metal ion transport;GO:0055065//metal ion home…
UNIGENE0017449	11	0	-0.23	-1.65	0.25	RYR2	PREDICTED: LOW QUALITY PROTEIN: ryanodine receptor 2-like [Sinocyclocheilus rhinocerous]	ko04020//Calcium signaling pathway//Signal transduction//Environmental Information Processing;ko04261//Adrenergic signaling in cardiomyocytes//Circulatory system//Organismal Systems;ko04260//Cardiac muscle contraction//Circulatory system//Organismal Systems	GO:0044425//membrane part;GO:0005623//cell;GO:0044464//cell part;GO:0016020//membrane;GO:0044424//intracellular part;GO:0031224//intrinsic component of membrane;GO:0043229//intracellular organelle;GO:0043231//intracellular membrane-bounded organelle;GO:0043227//membrane-bounded organelle;GO:0005622//intracellular;GO:0043226//organelle	GO:0005216//ion channel activity;GO:0022890//inorganic cation transmembrane transporter activity;GO:0004888//transmembrane signaling receptor activity;GO:0022836//gated channel activity;GO:0015278//calcium-release channel activity;GO:0022803//passive transmembrane transporter activity;GO:0015075//ion transmembrane transporter activity;GO:0005215//transporter activity;GO:0005262//calcium channel a…	GO:0055065//metal ion homeostasis;GO:0051179//localization;GO:0009987//cellular process;GO:0048878//chemical homeostasis;GO:0006873//cellular ion homeostasis;GO:0070838//divalent metal ion transport;GO:1902578//single-organism localization;GO:0098771//inorganic ion homeostasis;GO:0044763//single-organism cellular process;GO:0065008//regulation of biological quality;GO:0065007//biological regulati…
UNIGENE0017471	11	0	-0.03	-1.76	-0.68	-	--	-	-	-	-
UNIGENE0017482	11	0	0.88	-1.27	0.56	-	--	-	-	-	-
UNIGENE0017600	11	0	1.53	-8.22	-1.9	-	--	-	-	-	-
UNIGENE0017604	11	0	0.94	-1.22	0.41	-	--	-	-	-	-
UNIGENE0017627	11	0	-0.16	-1.53	1.04	-	PREDICTED: uncharacterized protein LOC109084816 [Cyprinus carpio]	-	-	-	-
UNIGENE0017635	11	0	-0.53	-1.94	0.98	-	PREDICTED: uncharacterized protein LOC107725866 [Sinocyclocheilus rhinocerous]	-	-	-	-
UNIGENE0017636	11	0	-0.15	-2.48	1.68	-	PREDICTED: uncharacterized protein LOC107725866 [Sinocyclocheilus rhinocerous]	-	-	-	-
UNIGENE0017679	11	0	0.14	-1.24	0.43	Dmbt1	PREDICTED: CUB and zona pellucida-like domain-containing protein 1 [Sinocyclocheilus grahami]	-	-	-	-
UNIGENE0017688	11	0	-0.1	-2.39	0.04	-	--	-	-	-	-
UNIGENE0017692	11	0	-0.59	-3.86	-0.71	-	--	-	-	-	-
UNIGENE0017697	11	0	-0.42	-1.36	0.62	SAMD9	PREDICTED: sterile alpha motif domain-containing protein 9-like isoform X1 [Sinocyclocheilus grahami]	-	-	-	-
UNIGENE0017811	11	0	0.18	-1.71	-0.63	-	--	-	-	-	-
UNIGENE0017826	11	0	0.17	-1.69	0.43	-	PREDICTED: mucin-5AC-like [Sinocyclocheilus anshuiensis]	-	-	-	-
UNIGENE0017858	11	0	0.74	-1.69	-0.52	-	--	-	-	-	-
UNIGENE0017866	11	0	-0.79	-3	-0.73	GIMAP5	PREDICTED: GTPase IMAP family member 8-like [Sinocyclocheilus anshuiensis]	-	-	-	-
UNIGENE0017878	11	0	1.26	-1.89	-0.11	-	--	-	-	-	-
UNIGENE0017956	11	0	0.58	-1.04	0.38	-	--	-	-	-	-
UNIGENE0017960	11	0	0.2	-0.71	0.68	-	Xin actin-binding repeat-containing protein 1 [Cricetulus griseus]	-	-	-	-
UNIGENE0018025	11	0	0.17	-1.94	0.31	-	--	-	-	-	-
UNIGENE0018055	11	0	-0.41	-1.19	0.49	-	--	-	-	-	-
UNIGENE0018124	11	0	-0.09	-2.72	1.04	-	PREDICTED: DELTA-actitoxin-Afr1a-like [Sinocyclocheilus grahami]	-	-	-	-
UNIGENE0018129	11	0	-0.07	-1.21	0.83	-	--	-	-	-	-
UNIGENE0018157	11	0	-0.49	-1.57	0.44	-	--	-	-	-	-
UNIGENE0018162	11	0	-0.01	-1.49	-0.35	GOLGA6L1	--	-	-	-	-
UNIGENE0018221	11	0	-0.11	-1.84	0.84	LITAF	PREDICTED: lipopolysaccharide-induced tumor necrosis factor-alpha factor homolog [Cyprinus carpio]	ko04142//Lysosome//Transport and catabolism//Cellular Processes	-	-	-
UNIGENE0018248	11	0	-0.29	-1.71	-0.03	-	PREDICTED: prefoldin subunit 4-like isoform X1 [Sinocyclocheilus rhinocerous]	-	-	-	-
UNIGENE0018280	11	0	-0.08	-1.27	-0.17	CCL25	PREDICTED: C-C motif chemokine 25-like [Sinocyclocheilus rhinocerous]	ko04060//Cytokine-cytokine receptor interaction//Signaling molecules and interaction//Environmental Information Processing;ko04672//Intestinal immune network for IgA production//Immune system//Organismal Systems	-	-	GO:0002376//immune system process
UNIGENE0018411	11	0	0.29	-1.79	-0.38	-	PREDICTED: taste receptor type 1 member 1-like [Sinocyclocheilus anshuiensis]	-	-	-	-
UNIGENE0018438	11	0	0.82	-0.78	0.24	-	--	-	-	-	-
UNIGENE0018441	11	0	-0.05	-1.11	-0.25	Stx11	PREDICTED: syntaxin-11-like [Sinocyclocheilus rhinocerous]	ko04130//SNARE interactions in vesicular transport//Folding, sorting and degradation//Genetic Information Processing	GO:0044464//cell part;GO:0044424//intracellular part;GO:0005623//cell;GO:0043226//organelle;GO:0043229//intracellular organelle;GO:0043231//intracellular membrane-bounded organelle;GO:0043227//membrane-bounded organelle;GO:0005622//intracellular	GO:0005488//binding;GO:0005515//protein binding	GO:0051234//establishment of localization;GO:0008104//protein localization;GO:0015031//protein transport;GO:0006810//transport;GO:0051179//localization;GO:0071702//organic substance transport;GO:0045184//establishment of protein localization;GO:0033036//macromolecule localization
UNIGENE0018452	11	0	0.83	-0.9	0.16	-	PREDICTED: cadherin EGF LAG seven-pass G-type receptor 1-like [Sinocyclocheilus grahami]	-	-	-	-
UNIGENE0018480	11	0	0.65	-1.41	-0.31	Ush1g	PREDICTED: Usher syndrome type-1G protein [Danio rerio]	-	-	-	-
UNIGENE0018488	11	0	0.87	-1.72	1.11	-	--	-	-	-	-
UNIGENE0018546	11	0	0.33	-2.85	0.03	-	--	-	-	-	-
UNIGENE0018594	11	0	-0.44	-2.61	0.48	-	PREDICTED: interferon-induced very large GTPase 1-like isoform X1 [Sinocyclocheilus anshuiensis]	-	-	-	-
UNIGENE0018698	11	0	-0.21	-1.77	0.34	-	--	-	-	-	-
UNIGENE0018717	11	0	-0.18	-4.67	-0.7	-	--	-	-	-	-
UNIGENE0018815	11	0	0.94	-1.64	-0.48	-	--	-	-	-	-
UNIGENE0018867	11	0	2.72	-5.71	1.76	-	--	-	-	-	-
UNIGENE0018941	11	0	-0.11	-1.46	0.81	Nptx1	PREDICTED: neuronal pentraxin-2 [Danio rerio]	-	-	-	-
UNIGENE0018993	11	0	0.57	-1.39	0.48	-	--	-	-	-	-
UNIGENE0019025	11	0	0.7	-0.96	0.96	-	--	-	-	-	-
UNIGENE0019073	11	0	0.32	-3.23	-0.75	-	--	-	-	-	-
UNIGENE0019101	11	0	0.57	-1.43	-0.25	-	--	-	-	-	-
UNIGENE0019127	11	0	0.24	-1.36	-0.21	-	--	-	-	-	-
UNIGENE0019167	11	0	-0.36	-2.04	0.65	slc4a1	PREDICTED: band 3 anion exchange protein-like [Cyprinus carpio]	-	GO:0016020//membrane;GO:0031224//intrinsic component of membrane;GO:0044425//membrane part	GO:0008509//anion transmembrane transporter activity;GO:0008514//organic anion transmembrane transporter activity;GO:0015291//secondary active transmembrane transporter activity;GO:0015301//anion:anion antiporter activity;GO:0015075//ion transmembrane transporter activity;GO:0022891//substrate-specific transmembrane transporter activity;GO:0015297//antiporter activity;GO:0022857//transmembrane tr…	GO:0006820//anion transport;GO:0015711//organic anion transport;GO:0006811//ion transport;GO:1902578//single-organism localization;GO:0044699//single-organism process;GO:0044765//single-organism transport;GO:0006810//transport;GO:0051234//establishment of localization;GO:0042221//response to chemical;GO:0050896//response to stimulus;GO:0042493//response to drug;GO:0071702//organic substance trans…
UNIGENE0019199	11	0	-0.31	-2.76	0.39	-	--	-	-	-	-
[truncated: 5,895 more rows]
